# Supplementary material for: RNA chaperones buffer deleterious mutations in E. coli
Source: eLife. 2015 Mar 25;4:e04745. doi: 10.7554/eLife.04745 (PMC4402597; doi:10.7554/eLife.04745)
Supplement: Supplementary file 1. — Mutations in the 20k strain. DOI: http://dx.doi.org/10.7554/eLife.04745.016 [file elife04745s001.xlsx]

## Sheet: 20k.eff_annot4.vcf
Supplementary file 1 - Mutations in the 20k strain compared to the reference REL606 genome
Variant_location: in relation to the REL606 reference genome (NC_012967.1)
Variant_type: SNP (Single nucleotide polymorphism), INS (insertion), DEL (deletion) [Insertion sequence variants are listed separately at the bottom of the table]
Variant_effect: as annotated by SnpEff v4.0 (http://snpeff.sourceforge.net/)
Predicted_impact: as categorized by SnpEff v4.0
Context: old codon context/new context for variants in coding sequence.
AA_change: The amino acid/nucleotide change and position within the protein/coding sequence
Gene: for variants in coding sequence, the gene affected
SNP_effect_string: full SnpEff-generated effect annotation. See SnpEff documentation
Expression_LB: Upper-quartile-normalized expression level of the gene in LB medium as computed by the Rockhopper software (http://cs.wellesley.edu/~btjaden/Rockhopper/index.html) across 3 biological replicates [NCBI Sequence Read Archive IDs: SRR794833, SRR794834, SRR794834]
Expression_Minimal: Upper-quartile-normalized expression level of the gene in minimal MOPS medium as computed by the Rockhopper software (http://cs.wellesley.edu/~btjaden/Rockhopper/index.html) across 3 biological replicates [NCBI Sequence Read Archive IDs: SRR794863, SRR794864, SRR794865]
COG(_class): the Cluster of Orthologous Group affiliation for proteins
Essential: Is the gene essential? (according to list compiled from multiple primary publications, available at http://ecoliwiki.net/colipedia/index.php/Essential_genes)
SNPs_in_gene: Summary of all variants present in the focal gene
MFE_reference(alt): Minimum free energies of WT (SNP-affected) RNA secondary structures as computed by RNAfold
MFE_freq_reference(alt): The frequency of the MFE structure in the ensembl of structures
Ensemble_diversity_reference(alt): The ensemble diversity computed by RNAfold
Dmax: Maximum local structural dissimilarity (WT versus SNP-affected structure) computed by RNAsnp
Dmax_interval: the RNA region where Dmax is found
Dmax_pval: Estimated significance of structural effect based on comparison to background distribution. See RNAsnp documentation for details
Rmin: Minimum local structural correlation (WT versus SNP-affected structure) computed by RNAsnp
Rmin_interval: the RNA region where Rmin is found
Rmin_pval: Estimated significance of structural effect based on comparison to background distribution. See RNAsnp documentation for details
Base_pairing_probability: Correlation of base pairing probabilities computed by SNPfold (http://ribosnitch.bio.unc.edu/snpfold/SNPfold.html)
Shannon_corr: Shannon correlation computed by SNPfold (http://ribosnitch.bio.unc.edu/snpfold/SNPfold.html)
RNA secondary structure and mutational effects were predicted based on coding regions of the respective genes. While mutations are listed individually, RNA secondary structures were determined using all mutations present in the relevant coding sequence.
Variant_location	Reference_allele	Variant_allele	Variant_type	Variant_effect	Predicted_impact	Context	AA_change	Gene	SNP_effect_string	Expression_LB	Expression_Minimal	COG	COG_class	Essential	Gene_start	Gene_end	Strand	SNPs_in_gene	MFE_reference	MFE_alt	MFE_freq_reference	MFE_freq_alt	Ensemble_diversity_reference	Ensemble_diversity_alt	CDS_GC_content	Dmax	Dmax_interval	Dmax_pval	Rmin	Rmin_interval	Rmin_pval	Base_pairing_probability	Shannon_corr
322	A	G	SNP	upstream_gene_variant	MODIFIER	.	.	.	EFF=upstream_gene_variant(MODIFIER||14||820|thrA|protein_coding|CODING|ACT37695||1),upstream_gene_variant(MODIFIER||2478||310|thrB|protein_coding|CODING|ACT37696||1),upstream_gene_variant(MODIFIER||3411||428|thrC|protein_coding|CODING|ACT37697||1),upstream_gene_variant(MODIFIER||4910||98|yaaX|protein_coding|CODING|ACT37698||1),downstream_gene_variant(MODIFIER||67||21|thrL|protein_coding|CODING|AC…	.	.	NA	NA	.	.	.	.	.	.	.	.	.	.	.	.	.	.	.	.	.	.	.	.
1624	T	C	SNP	missense_variant	MODERATE	aTt/aCt	p.Ile430Thr/c.1289T>C	thrA	EFF=missense_variant(MODERATE|MISSENSE|aTt/aCt|p.Ile430Thr/c.1289T>C|820|thrA|protein_coding|CODING|ACT37695|1|1),upstream_gene_variant(MODIFIER||1176||310|thrB|protein_coding|CODING|ACT37696||1),upstream_gene_variant(MODIFIER||2109||428|thrC|protein_coding|CODING|ACT37697||1),upstream_gene_variant(MODIFIER||3608||98|yaaX|protein_coding|CODING|ACT37698||1),downstream_gene_variant(MODIFIER||1369||…	221	518	COG0527	E	NO	336	2798	+	T1289C	-1036.36	-1038.95	1.03248e-28	1.05963e-28	478.13	462.53	0.5387	0.0162	1278-1346	0.7625	0.9453	1280-1329	0.7783	0.999365	0.991924
7371	C	T	SNP	missense_variant	MODERATE	gGt/gAt	p.Gly196Asp/c.587G>A	yaaJ	EFF=missense_variant(MODERATE|MISSENSE|gGt/gAt|p.Gly196Asp/c.587G>A|476|yaaJ|protein_coding|CODING|ACT37700|1|1),upstream_gene_variant(MODIFIER||865||317|talB|protein_coding|CODING|ACT37701||1),upstream_gene_variant(MODIFIER||1933||195|mogA|protein_coding|CODING|ACT37702||1),upstream_gene_variant(MODIFIER||3457||161|htgA|protein_coding|CODING|ACT37705||1),upstream_gene_variant(MODIFIER||914||258|…	5	46	COG1115	E	NO	6527	7957	-	G587A	-595.11	-595.59	5.2354e-15	8.74399e-15	417.23	412.91	0.5536	0.0204	586-684	0.7199	0.7329	600-653	0.4639	0.995533	0.992087
14264	C	T	SNP	synonymous_variant	LOW	caC/caT	p.His33His/c.99C>T	dnaJ	EFF=synonymous_variant(LOW|SILENT|caC/caT|p.His33His/c.99C>T|376|dnaJ|protein_coding|CODING|ACT37708|1|1),upstream_gene_variant(MODIFIER||1179||370|insL-1|protein_coding|CODING|ACT37709||1),upstream_gene_variant(MODIFIER||3772||188|yaaH|protein_coding|CODING|ACT37703||1),upstream_gene_variant(MODIFIER||2910||237|yaaW|protein_coding|CODING|ACT37704||1),upstream_gene_variant(MODIFIER||2480||134|yaa…	206	107	COG0484	O	NO	14166	15296	+	C99T	-480.85	-478.05	1.25023e-10	1.22903e-10	274.67	275.19	0.4983	0.0001	69-118	0.9951	0.9998	68-118	0.993	0.999983	0.999609
16966	G	GGGG	INS	upstream_gene_variant	MODIFIER	.	.	.	EFF=upstream_gene_variant(MODIFIER||521||388|nhaA|protein_coding|CODING|ACT37712||1|WARNING_TRANSCRIPT_NO_START_CODON),upstream_gene_variant(MODIFIER||1747||301|nhaR|protein_coding|CODING|ACT37713||1),upstream_gene_variant(MODIFIER||66||50|hokC|protein_coding|CODING|ACT37710||1),upstream_gene_variant(MODIFIER||9||69|mokC|protein_coding|CODING|ACT37711||1),downstream_gene_variant(MODIFIER||2890||6…	.	.	NA	NA	.	.	.	.	.	.	.	.	.	.	.	.	.	.	.	.	.	.	.	.
18220	C	T	SNP	missense_variant	MODERATE	Cgt/Tgt	p.Arg245Cys/c.733C>T	nhaA	EFF=missense_variant(MODERATE|MISSENSE|Cgt/Tgt|p.Arg245Cys/c.733C>T|388|nhaA|protein_coding|CODING|ACT37712|1|1|WARNING_TRANSCRIPT_NO_START_CODON),upstream_gene_variant(MODIFIER||494||301|nhaR|protein_coding|CODING|ACT37713||1),upstream_gene_variant(MODIFIER||1319||50|hokC|protein_coding|CODING|ACT37710||1),upstream_gene_variant(MODIFIER||1262||69|mokC|protein_coding|CODING|ACT37711||1),downstrea…	342	131	COG3004	P	NO	17488	18654	+	C733T	-513.07	-510.9	2.1503e-11	2.38965e-11	398.38	407.75	0.5436	0.1566	724-773	0.1627	0.5227	724-773	0.292	0.836649	0.839746
40541	A	G	SNP	missense_variant	MODERATE	gTg/gCg	p.Val498Ala/c.1493T>C	caiC	EFF=missense_variant(MODERATE|MISSENSE|gTg/gCg|p.Val498Ala/c.1493T>C|522|caiC|protein_coding|CODING|ACT37735|1|1),upstream_gene_variant(MODIFIER||976||196|caiE|protein_coding|CODING|ACT37733||1|WARNING_TRANSCRIPT_NO_START_CODON),upstream_gene_variant(MODIFIER||77||297|caiD|protein_coding|CODING|ACT37734||1),downstream_gene_variant(MODIFIER||2432||1073|carB|protein_coding|CODING|ACT37731||1),downs…	4	22	COG0318	IQ	NO	40465	42033	-	T1493C	-646.52	-646.49	7.82805e-17	9.67971e-17	285.02	285.79	0.426	0.0709	1479-1532	0.3756	0.7845	1474-1523	0.5202	0.993297	0.957441
50855	A	G	SNP	missense_variant	MODERATE	aAc/aGc	p.Asn285Ser/c.854A>G	yaaU	EFF=missense_variant(MODERATE|MISSENSE|aAc/aGc|p.Asn285Ser/c.854A>G|443|yaaU|protein_coding|CODING|ACT37742|1|1),upstream_gene_variant(MODIFIER||4731||504|caiT|protein_coding|CODING|ACT37737||1),upstream_gene_variant(MODIFIER||586||176|yabF|protein_coding|CODING|ACT37743||1),upstream_gene_variant(MODIFIER||1109||620|kefC|protein_coding|CODING|ACT37744||1),upstream_gene_variant(MODIFIER||3163||159…	0	55	COG0477	GEPR	NO	50002	51333	+	A854G-T1108C	-611.46	-613.56	1.95552e-14	1.8925e-14	174.31	181.37	0.5344	0.341	840-905	0.0306	0.0993	831-880	0.1036	0.941859	0.968465
51109	T	C	SNP	missense_variant	MODERATE	Tct/Cct	p.Ser370Pro/c.1108T>C	yaaU	EFF=missense_variant(MODERATE|MISSENSE|Tct/Cct|p.Ser370Pro/c.1108T>C|443|yaaU|protein_coding|CODING|ACT37742|1|1),upstream_gene_variant(MODIFIER||4985||504|caiT|protein_coding|CODING|ACT37737||1),upstream_gene_variant(MODIFIER||332||176|yabF|protein_coding|CODING|ACT37743||1),upstream_gene_variant(MODIFIER||855||620|kefC|protein_coding|CODING|ACT37744||1),upstream_gene_variant(MODIFIER||2909||159…	0	55	COG0477	GEPR	NO	50002	51333	+	A854G-T1108C	-611.46	-613.56	1.95552e-14	1.8925e-14	174.31	181.37	0.5344	0.341	840-905	0.0306	0.0993	831-880	0.1036	0.941859	0.968465
63409	A	G	SNP	missense_variant	MODERATE	aTc/aCc	p.Ile887Thr/c.2660T>C	rapA (hepA)	EFF=missense_variant(MODERATE|MISSENSE|aTc/aCc|p.Ile887Thr/c.2660T>C|968|hepA|protein_coding|CODING|ACT37754|1|1),upstream_gene_variant(MODIFIER||4512||428|surA|protein_coding|CODING|ACT37750||1),upstream_gene_variant(MODIFIER||2105||784|imp|protein_coding|CODING|ACT37751||1),upstream_gene_variant(MODIFIER||259||219|rluA|protein_coding|CODING|ACT37753||1),downstream_gene_variant(MODIFIER||2824||7…	291	56	COG0553	KL	NO	63162	66068	-	C913T-T1565C-T2660C	-1246.94	-1246.33	1.71734e-26	4.96735e-26	667.91	674.91	0.5521	0.1954	826-910	0.1124	0.2563	845-906	0.1564	0.971039
64504	A	G	SNP	missense_variant	MODERATE	gTa/gCa	p.Val522Ala/c.1565T>C	rapA (hepA)	EFF=missense_variant(MODERATE|MISSENSE|gTa/gCa|p.Val522Ala/c.1565T>C|968|hepA|protein_coding|CODING|ACT37754|1|1),upstream_gene_variant(MODIFIER||3200||784|imp|protein_coding|CODING|ACT37751||1),upstream_gene_variant(MODIFIER||1354||219|rluA|protein_coding|CODING|ACT37753||1),downstream_gene_variant(MODIFIER||1729||783|polB|protein_coding|CODING|ACT37755||1|WARNING_TRANSCRIPT_NO_START_CODON),down…	291	56	COG0553	KL	NO	63162	66068	-	C913T-T1565C-T2660C	-1246.94	-1246.33	1.71734e-26	4.96735e-26	667.91	674.91	0.5521	0.1954	826-910	0.1124	0.2563	845-906	0.1564	0.971039
65156	G	A	SNP	missense_variant	MODERATE	Cac/Tac	p.His305Tyr/c.913C>T	rapA (hepA)	EFF=missense_variant(MODERATE|MISSENSE|Cac/Tac|p.His305Tyr/c.913C>T|968|hepA|protein_coding|CODING|ACT37754|1|1),upstream_gene_variant(MODIFIER||3852||784|imp|protein_coding|CODING|ACT37751||1),upstream_gene_variant(MODIFIER||2006||219|rluA|protein_coding|CODING|ACT37753||1),downstream_gene_variant(MODIFIER||1077||783|polB|protein_coding|CODING|ACT37755||1|WARNING_TRANSCRIPT_NO_START_CODON),downs…	291	56	COG0553	KL	NO	63162	66068	-	C913T-T1565C-T2660C	-1246.94	-1246.33	1.71734e-26	4.96735e-26	667.91	674.91	0.5521	0.1954	826-910	0.1124	0.2563	845-906	0.1564	0.971039
69557	A	G	SNP	upstream_gene_variant	MODIFIER	.	.	.	EFF=upstream_gene_variant(MODIFIER||3489||968|hepA|protein_coding|CODING|ACT37754||1),upstream_gene_variant(MODIFIER||3634||292|araC|protein_coding|CODING|ACT37759||1),upstream_gene_variant(MODIFIER||973||783|polB|protein_coding|CODING|ACT37755||1|WARNING_TRANSCRIPT_NO_START_CODON),upstream_gene_variant(MODIFIER||4598||254|yabI|protein_coding|CODING|ACT37760||1),upstream_gene_variant(MODIFIER||20…	.	.	NA	NA	.	.	.	.	.	.	.	.	.	.	.	.	.	.	.	.	.	.	.	.
70867	T	C	SNP	missense_variant	MODERATE	gAc/gGc	p.Asp92Gly/c.275A>G	araA	EFF=missense_variant(MODERATE|MISSENSE|gAc/gGc|p.Asp92Gly/c.275A>G|500|araA|protein_coding|CODING|ACT37757|1|1),upstream_gene_variant(MODIFIER||4799||968|hepA|protein_coding|CODING|ACT37754||1),upstream_gene_variant(MODIFIER||2324||292|araC|protein_coding|CODING|ACT37759||1),upstream_gene_variant(MODIFIER||2283||783|polB|protein_coding|CODING|ACT37755||1|WARNING_TRANSCRIPT_NO_START_CODON),upstrea…	0	23	COG2160	G	NO	.	.	.	.	.	.	.	.	.	.	.	.	.	.	.	.	.	.	.
75888	C	T	SNP	missense_variant	MODERATE	Gtg/Atg	p.Val480Met/c.1438G>A	thiP	EFF=missense_variant(MODERATE|MISSENSE|Gtg/Atg|p.Val480Met/c.1438G>A|536|thiP|protein_coding|CODING|ACT37762|1|1),upstream_gene_variant(MODIFIER||4747||500|araA|protein_coding|CODING|ACT37757||1),upstream_gene_variant(MODIFIER||3036||566|araB|protein_coding|CODING|ACT37758||1),upstream_gene_variant(MODIFIER||4537||392|setA|protein_coding|CODING|ACT37765||1),upstream_gene_variant(MODIFIER||157||23…	18	31	COG1178	P	NO	75715	77325	-	G1143A-G1438A	-779.53	-779.53	4.15864e-17	6.5394e-17	310.04	302.48	0.559	0.0418	1432-1611	0.5488	0.8498	1341-1475	0.6058	0.978205	0.95911
76183	C	T	SNP	missense_variant	MODERATE	atG/atA	p.Met381Ile/c.1143G>A	thiP	EFF=missense_variant(MODERATE|MISSENSE|atG/atA|p.Met381Ile/c.1143G>A|536|thiP|protein_coding|CODING|ACT37762|1|1),upstream_gene_variant(MODIFIER||3331||566|araB|protein_coding|CODING|ACT37758||1),upstream_gene_variant(MODIFIER||4242||392|setA|protein_coding|CODING|ACT37765||1),upstream_gene_variant(MODIFIER||452||232|yabJ|protein_coding|CODING|ACT37761||1),downstream_gene_variant(MODIFIER||1118||…	18	31	COG1178	P	NO	75715	77325	-	G1143A-G1438A	-779.53	-779.53	4.15864e-17	6.5394e-17	310.04	302.48	0.559	0.0418	1432-1611	0.5488	0.8498	1341-1475	0.6058	0.978205	0.95911
79312	A	G	SNP	synonymous_variant	LOW	caT/caC	p.His264His/c.792T>C	yabN	EFF=synonymous_variant(LOW|SILENT|caT/caC|p.His264His/c.792T>C|551|yabN|protein_coding|CODING|ACT37764|1|1),upstream_gene_variant(MODIFIER||1113||392|setA|protein_coding|CODING|ACT37765||1),upstream_gene_variant(MODIFIER||3581||232|yabJ|protein_coding|CODING|ACT37761||1),upstream_gene_variant(MODIFIER||1987||536|thiP|protein_coding|CODING|ACT37762||1),upstream_gene_variant(MODIFIER||1028||327|tbp…	24	27	COG4533	R	NO	78448	80103	-	T792C	-709.32	-708.66	1.60787e-16	1.1887e-16	405.41	351.77	0.5362	0.0627	753-802	0.4306	0.5086	720-802	0.283	0.968004	0.971655
80586	T	C	SNP	synonymous_variant	LOW	ttT/ttC	p.Phe54Phe/c.162T>C	setA	EFF=synonymous_variant(LOW|SILENT|ttT/ttC|p.Phe54Phe/c.162T>C|392|setA|protein_coding|CODING|ACT37765|1|1),upstream_gene_variant(MODIFIER||4855||232|yabJ|protein_coding|CODING|ACT37761||1),upstream_gene_variant(MODIFIER||3261||536|thiP|protein_coding|CODING|ACT37762||1),upstream_gene_variant(MODIFIER||2302||327|tbpA|protein_coding|CODING|ACT37763||1|WARNING_TRANSCRIPT_NO_START_CODON),upstream_gen…	42	73	COG0477	GEPR	NO	80425	81603	+	T162C	-479.46	-477.84	1.00224e-13	9.56639e-14	276.83	281.43	0.4917	0.0301	33-163	0.5967	0.9563	34-162	0.7967	0.995757	0.991521
84433	C	T	SNP	synonymous_variant	LOW	ccG/ccA	p.Pro110Pro/c.330G>A	leuB	EFF=synonymous_variant(LOW|SILENT|ccG/ccA|p.Pro110Pro/c.330G>A|363|leuB|protein_coding|CODING|ACT37768|1|1),upstream_gene_variant(MODIFIER||4330||551|yabN|protein_coding|CODING|ACT37764||1),upstream_gene_variant(MODIFIER||2739||314|leuO|protein_coding|CODING|ACT37771||1),upstream_gene_variant(MODIFIER||2176||201|leuD|protein_coding|CODING|ACT37766||1),upstream_gene_variant(MODIFIER||4001||574|ilv…	7	532	COG0473	CE	NO	83671	84762	-	G330A	-453.73	-450.11	4.89562e-13	9.10251e-14	248.75	265.11	0.5711	0.0138	182-332	0.7888	0.9244	182-332	0.7325	0.889976	0.743142
89057	A	AA	INS	frameshift_variant	HIGH	ccg/Accg	p.Pro209_Val210fs/c.625_626insA	ilvI	EFF=frameshift_variant(HIGH||ccg/Accg|p.Pro209_Val210fs/c.625_626insA|574|ilvI|protein_coding|CODING|ACT37772|1|1),upstream_gene_variant(MODIFIER||4296||363|leuB|protein_coding|CODING|ACT37768||1),upstream_gene_variant(MODIFIER||1103||163|ilvH|protein_coding|CODING|ACT37773||1),upstream_gene_variant(MODIFIER||1774||334|fruR|protein_coding|CODING|ACT37774||1|WARNING_TRANSCRIPT_NO_START_CODON),upst…	6	171	COG0028	EH	NO	.	.	.	.	.	.	.	.	.	.	.	.	.	.	.	.	.	.	.
97973	A	G	SNP	missense_variant	MODERATE	Act/Gct	p.Thr174Ala/c.520A>G	murF	EFF=missense_variant(MODERATE|MISSENSE|Act/Gct|p.Thr174Ala/c.520A>G|452|murF|protein_coding|CODING|ACT37780|1|1),upstream_gene_variant(MODIFIER||833||360|mraY|protein_coding|CODING|ACT37781||1),upstream_gene_variant(MODIFIER||1918||438|murD|protein_coding|CODING|ACT37782||1),upstream_gene_variant(MODIFIER||3234||414|ftsW|protein_coding|CODING|ACT37783||1),upstream_gene_variant(MODIFIER||4475||355…	111	47	COG0770	M	NO	97454	98812	+	A520G	-589.69	-589.29	4.32408e-14	3.36786e-14	215.81	250.25	0.5486	0.3774	483-532	0.0225	-0.3037	503-568	0.027	0.97722	0.870767
101716	A	G	SNP	synonymous_variant	LOW	gaA/gaG	p.Glu170Glu/c.510A>G	ftsW	EFF=synonymous_variant(LOW|SILENT|gaA/gaG|p.Glu170Glu/c.510A>G|414|ftsW|protein_coding|CODING|ACT37783|1|1),upstream_gene_variant(MODIFIER||732||355|murG|protein_coding|CODING|ACT37784||1),upstream_gene_variant(MODIFIER||1853||491|murC|protein_coding|CODING|ACT37785||1),upstream_gene_variant(MODIFIER||3321||306|ddlB|protein_coding|CODING|ACT37786||1),upstream_gene_variant(MODIFIER||4243||276|ftsQ…	137	74	COG0772	D	YES	101207	102451	+	A510G	-555.39	-555.48	5.60259e-15	8.15158e-15	248.97	327.54	0.5312	0.0404	462-524	0.5585	0.5701	465-524	0.3244	0.936829	0.838277
108461	A	G	SNP	missense_variant	MODERATE	gAa/gGa	p.Glu118Gly/c.353A>G	ftsZ	EFF=missense_variant(MODERATE|MISSENSE|gAa/gGa|p.Glu118Gly/c.353A>G|383|ftsZ|protein_coding|CODING|ACT37789|1|1),upstream_gene_variant(MODIFIER||900||305|lpxC|protein_coding|CODING|ACT37790||1),upstream_gene_variant(MODIFIER||2048||170|yacA|protein_coding|CODING|ACT37791||1|WARNING_TRANSCRIPT_NO_START_CODON),upstream_gene_variant(MODIFIER||2622||901|secA|protein_coding|CODING|ACT37792||1),downstr…	448	455	COG0206	D	YES	108109	109260	+	A353G	-491.56	-495.11	1.68202e-14	4.75492e-14	316.37	202.13	0.5511	0.1602	310-360	0.1571	0.1988	310-359	0.1352	0.998746	0.969859
110356	TT	T	DEL	upstream_gene_variant	MODIFIER	.	.	.	EFF=upstream_gene_variant(MODIFIER||152||170|yacA|protein_coding|CODING|ACT37791||1|WARNING_TRANSCRIPT_NO_START_CODON),upstream_gene_variant(MODIFIER||726||901|secA|protein_coding|CODING|ACT37792||1),upstream_gene_variant(MODIFIER||3491||129|mutT|protein_coding|CODING|ACT37793||1),downstream_gene_variant(MODIFIER||4400||306|ddlB|protein_coding|CODING|ACT37786||1),downstream_gene_variant(MODIFIER|…	.	.	NA	NA	.	.	.	.	.	.	.	.	.	.	.	.	.	.	.	.	.	.	.	.
112909	A	G	SNP	synonymous_variant	LOW	aaA/aaG	p.Lys609Lys/c.1827A>G	secA	EFF=synonymous_variant(LOW|SILENT|aaA/aaG|p.Lys609Lys/c.1827A>G|901|secA|protein_coding|CODING|ACT37792|1|1),upstream_gene_variant(MODIFIER||939||129|mutT|protein_coding|CODING|ACT37793||1),upstream_gene_variant(MODIFIER||3339||347|guaC|protein_coding|CODING|ACT37797||1),downstream_gene_variant(MODIFIER||4861||420|ftsA|protein_coding|CODING|ACT37788||1),downstream_gene_variant(MODIFIER||3649||383…	277	96	COG0653	U	YES	111083	113788	+	A1827G-T2048C	-1093.72	-1094.06	3.84935e-28	9.4767e-29	639.31	659.86	0.5209	0.0457	2012-2063	0.5242	0.7911	2013-2062	0.5285	0.982076	0.920917
113130	T	C	SNP	missense_variant	MODERATE	gTg/gCg	p.Val683Ala/c.2048T>C	secA	EFF=missense_variant(MODERATE|MISSENSE|gTg/gCg|p.Val683Ala/c.2048T>C|901|secA|protein_coding|CODING|ACT37792|1|1),upstream_gene_variant(MODIFIER||718||129|mutT|protein_coding|CODING|ACT37793||1),upstream_gene_variant(MODIFIER||3118||347|guaC|protein_coding|CODING|ACT37797||1),downstream_gene_variant(MODIFIER||3870||383|ftsZ|protein_coding|CODING|ACT37789||1),downstream_gene_variant(MODIFIER||1323…	277	96	COG0653	U	YES	111083	113788	+	A1827G-T2048C	-1093.72	-1094.06	3.84935e-28	9.4767e-29	639.31	659.86	0.5209	0.0457	2012-2063	0.5242	0.7911	2013-2062	0.5285	0.982076	0.920917
117267	A	G	SNP	synonymous_variant	LOW	gaA/gaG	p.Glu340Glu/c.1020A>G	guaC	EFF=synonymous_variant(LOW|SILENT|gaA/gaG|p.Glu340Glu/c.1020A>G|347|guaC|protein_coding|CODING|ACT37797|1|1),upstream_gene_variant(MODIFIER||2617||65|yacG|protein_coding|CODING|ACT37794||1),upstream_gene_variant(MODIFIER||1864||247|yacF|protein_coding|CODING|ACT37795||1),upstream_gene_variant(MODIFIER||1244||206|coaE|protein_coding|CODING|ACT37796||1),upstream_gene_variant(MODIFIER||4270||183|amp…	182	256	COG0516	F	NO	116248	117291	+	A1020G	-408.97	-409.2	4.7589e-12	2.45274e-12	226.35	223.81	0.5333	0.0484	994-1043	0.4568	0.944	994-1043	0.7337	0.99036	0.984052
119487	C	T	SNP	synonymous_variant	LOW	gtG/gtA	p.Val139Val/c.417G>A	hofB	EFF=synonymous_variant(LOW|SILENT|gtG/gtA|p.Val139Val/c.417G>A|461|hofB|protein_coding|CODING|ACT37799|1|1),upstream_gene_variant(MODIFIER||4837||65|yacG|protein_coding|CODING|ACT37794||1),upstream_gene_variant(MODIFIER||4084||247|yacF|protein_coding|CODING|ACT37795||1),upstream_gene_variant(MODIFIER||3464||206|coaE|protein_coding|CODING|ACT37796||1),upstream_gene_variant(MODIFIER||2050||183|ampD…	4	27	COG2804	NU	NO	118518	119903	-	G417A	-553.26	-553.26	2.24591e-14	2.85373e-14	229.29	228.92	0.5287	0.0288	285-573	0.6451	0.8673	285-439	0.6319	0.999857	0.999643
121405	C	T	SNP	synonymous_variant	LOW	ctG/ctA	p.Leu15Leu/c.45G>A	nadC	EFF=synonymous_variant(LOW|SILENT|ctG/ctA|p.Leu15Leu/c.45G>A|297|nadC|protein_coding|CODING|ACT37801|1|1),upstream_gene_variant(MODIFIER||132||183|ampD|protein_coding|CODING|ACT37802||1),upstream_gene_variant(MODIFIER||680||284|ampE|protein_coding|CODING|ACT37803||1),upstream_gene_variant(MODIFIER||2877||400|hofC|protein_coding|CODING|ACT37798||1),upstream_gene_variant(MODIFIER||3491||254|pdhR|pr…	75	59	COG0157	H	NO	120556	121449	-	G45A	-340.79	-340.11	9.21692e-10	5.86593e-09	247.41	221.02	0.551	0.0001	44-118	0.9949	0.9996	40-167	0.9864	0.929442	0.837938
123538	A	G	SNP	missense_variant	MODERATE	gTg/gCg	p.Val273Ala/c.818T>C	aroP	EFF=missense_variant(MODERATE|MISSENSE|gTg/gCg|p.Val273Ala/c.818T>C|457|aroP|protein_coding|CODING|ACT37804|1|1),upstream_gene_variant(MODIFIER||1358||254|pdhR|protein_coding|CODING|ACT37805||1),upstream_gene_variant(MODIFIER||3635||461|hofB|protein_coding|CODING|ACT37799||1),upstream_gene_variant(MODIFIER||3185||146|ppdD|protein_coding|CODING|ACT37800||1),upstream_gene_variant(MODIFIER||2283||88…	26	201	COG1113	E	NO	122982	124355	-	G519A-T818C	-589.61	-588.33	3.39449e-15	5.61555e-16	526.77	367.05	0.53	0.075	511-595	0.3757	0.4442	517-571	0.2447	0.933972	0.920472
123837	C	T	SNP	stop_gained	HIGH	tgG/tgA	p.Trp173*/c.519G>A	aroP	EFF=stop_gained(HIGH|NONSENSE|tgG/tgA|p.Trp173*/c.519G>A|457|aroP|protein_coding|CODING|ACT37804|1|1),upstream_gene_variant(MODIFIER||1059||254|pdhR|protein_coding|CODING|ACT37805||1),upstream_gene_variant(MODIFIER||3934||461|hofB|protein_coding|CODING|ACT37799||1),upstream_gene_variant(MODIFIER||3484||146|ppdD|protein_coding|CODING|ACT37800||1),upstream_gene_variant(MODIFIER||1984||887|aceE|prot…	26	201	COG1113	E	NO	122982	124355	-	G519A-T818C	-589.61	-588.33	3.39449e-15	5.61555e-16	526.77	367.05	0.53	0.075	511-595	0.3757	0.4442	517-571	0.2447	0.933972	0.920472
126767	A	G	SNP	missense_variant	MODERATE	aAc/aGc	p.Asn316Ser/c.947A>G	aceE	EFF=missense_variant(MODERATE|MISSENSE|aAc/aGc|p.Asn316Ser/c.947A>G|887|aceE|protein_coding|CODING|ACT37806|1|1),upstream_gene_variant(MODIFIER||1732||630|aceF|protein_coding|CODING|ACT37807||1),upstream_gene_variant(MODIFIER||2412||457|aroP|protein_coding|CODING|ACT37804||1),upstream_gene_variant(MODIFIER||3949||474|lpdA|protein_coding|CODING|ACT37808||1),downstream_gene_variant(MODIFIER||4679||…	3425	447	COG2609	C	NO	125821	128484	+	A947G	-1105.57	-1105.15	7.43859e-23	2.43858e-23	351.75	365.27	0.5087	0.0186	754-954	0.7379	0.9395	763-953	0.7649	0.9922	0.969382
129628	C	T	SNP	missense_variant	MODERATE	gCa/gTa	p.Ala377Val/c.1130C>T	aceF	EFF=missense_variant(MODERATE|MISSENSE|gCa/gTa|p.Ala377Val/c.1130C>T|630|aceF|protein_coding|CODING|ACT37807|1|1),upstream_gene_variant(MODIFIER||1088||474|lpdA|protein_coding|CODING|ACT37808||1),upstream_gene_variant(MODIFIER||4791||865|acnB|protein_coding|CODING|ACT37810||1|WARNING_TRANSCRIPT_NO_START_CODON),downstream_gene_variant(MODIFIER||3968||254|pdhR|protein_coding|CODING|ACT37805||1),dow…	1855	270	COG0508	C	NO	128499	130391	+	C1130T	-853.39	-851.25	3.82859e-20	2.1047e-20	301.86	329.07	0.5362	0.0317	1102-1164	0.6214	0.9046	1068-1157	0.6944	0.995885	0.915838
141640	A	G	SNP	stop_lost	HIGH	Taa/Caa	p.Ter797Glnext*?/c.2389T>C	gcd	EFF=stop_lost(HIGH|MISSENSE|Taa/Caa|p.Ter797Glnext*?/c.2389T>C|796|gcd|protein_coding|CODING|ACT37816|1|1),upstream_gene_variant(MODIFIER||3255||264|speD|protein_coding|CODING|ACT37812||1),upstream_gene_variant(MODIFIER||2594||178|hpt|protein_coding|CODING|ACT37817||1),upstream_gene_variant(MODIFIER||2373||288|speE|protein_coding|CODING|ACT37813||1),upstream_gene_variant(MODIFIER||1920||115|yacC|…	57	47	COG4993	G	NO	141638	144028	-	G1859A-T2389C	-1045.96	-1043.01	1.97056e-24	8.14518e-25	618.26	562.73	0.5457	0.0252	1664-1778	0.6752	0.8746	1664-1778	0.6434	0.985457	0.974219
142170	C	T	SNP	missense_variant	MODERATE	cGt/cAt	p.Arg620His/c.1859G>A	gcd	EFF=missense_variant(MODERATE|MISSENSE|cGt/cAt|p.Arg620His/c.1859G>A|796|gcd|protein_coding|CODING|ACT37816|1|1),upstream_gene_variant(MODIFIER||3785||264|speD|protein_coding|CODING|ACT37812||1),upstream_gene_variant(MODIFIER||2064||178|hpt|protein_coding|CODING|ACT37817||1),upstream_gene_variant(MODIFIER||2903||288|speE|protein_coding|CODING|ACT37813||1),upstream_gene_variant(MODIFIER||2450||115…	57	47	COG4993	G	NO	141638	144028	-	G1859A-T2389C	-1045.96	-1043.01	1.97056e-24	8.14518e-25	618.26	562.73	0.5457	0.0252	1664-1778	0.6752	0.8746	1664-1778	0.6434	0.985457	0.974219
145420	C	T	SNP	synonymous_variant	LOW	ctG/ctA	p.Leu18Leu/c.54G>A	yadF	EFF=synonymous_variant(LOW|SILENT|ctG/ctA|p.Leu18Leu/c.54G>A|220|yadF|protein_coding|CODING|ACT37818|1|1),upstream_gene_variant(MODIFIER||162||308|yadG|protein_coding|CODING|ACT37819||1),upstream_gene_variant(MODIFIER||1085||256|yadH|protein_coding|CODING|ACT37820||1),upstream_gene_variant(MODIFIER||1960||146|yadI|protein_coding|CODING|ACT37821||1),upstream_gene_variant(MODIFIER||2464||409|yadE|p…	567	489	COG0288	P	YES	144811	145473	-	G54A	-242.92	-240.18	4.55328e-08	5.55585e-08	114.14	127.55	0.4803	0.2577	41-90	0.0478	-0.1318	41-90	0.0435	0.954046	0.96291
146098	C	T	SNP	missense_variant	MODERATE	Cgc/Tgc	p.Arg173Cys/c.517C>T	yadG	EFF=missense_variant(MODERATE|MISSENSE|Cgc/Tgc|p.Arg173Cys/c.517C>T|308|yadG|protein_coding|CODING|ACT37819|1|1),upstream_gene_variant(MODIFIER||407||256|yadH|protein_coding|CODING|ACT37820||1),upstream_gene_variant(MODIFIER||1282||146|yadI|protein_coding|CODING|ACT37821||1),upstream_gene_variant(MODIFIER||1786||409|yadE|protein_coding|CODING|ACT37822||1),upstream_gene_variant(MODIFIER||2070||796…	191	128	COG1131	V	NO	145582	146508	+	C517T	-332.34	-333.31	1.8489e-10	8.19141e-10	209.65	246.8	0.4913	0.071	327-537	0.326	0.2901	654-705	0.1414	0.884683	0.804787
146625	A	G	SNP	missense_variant	MODERATE	Atc/Gtc	p.Ile41Val/c.121A>G	yadH	EFF=missense_variant(MODERATE|MISSENSE|Atc/Gtc|p.Ile41Val/c.121A>G|256|yadH|protein_coding|CODING|ACT37820|1|1),upstream_gene_variant(MODIFIER||755||146|yadI|protein_coding|CODING|ACT37821||1),upstream_gene_variant(MODIFIER||1259||409|yadE|protein_coding|CODING|ACT37822||1),upstream_gene_variant(MODIFIER||2597||796|gcd|protein_coding|CODING|ACT37816||1),upstream_gene_variant(MODIFIER||3146||300|y…	86	60	COG0842	V	NO	146505	147275	+	A121G	-312.1	-314.98	7.06504e-09	1.35689e-07	90.44	133.81	0.4953	0.0648	108-157	0.3889	0.5386	111-160	0.2913	0.959165	0.953587
153477	A	G	SNP	synonymous_variant	LOW	agT/agC	p.Ser129Ser/c.387T>C	yadC	EFF=synonymous_variant(LOW|SILENT|agT/agC|p.Ser129Ser/c.387T>C|448|yadC|protein_coding|CODING|ACT37827|1|1),upstream_gene_variant(MODIFIER||3980||126|panD|protein_coding|CODING|ACT37823||1),upstream_gene_variant(MODIFIER||1879||283|panC|protein_coding|CODING|ACT37825||1|WARNING_TRANSCRIPT_NO_START_CODON),upstream_gene_variant(MODIFIER||1073||264|panB|protein_coding|CODING|ACT37826||1),downstream_…	6	27	COG3539	NU	NO	152517	153863	-	T387C	-393.83	-393.84	5.77305e-16	1.15759e-16	396.64	423.56	0.3965	0.0558	227-414	0.3859	0.8036	237-407	0.5164	0.998233	0.991964
160667	C	T	SNP	missense_variant	MODERATE	atG/atA	p.Met426Ile/c.1278G>A	pcnB	EFF=missense_variant(MODERATE|MISSENSE|atG/atA|p.Met426Ile/c.1278G>A|454|pcnB|protein_coding|CODING|ACT37835|1|1|WARNING_TRANSCRIPT_NO_START_CODON),upstream_gene_variant(MODIFIER||2397||866|htrE|protein_coding|CODING|ACT37831||1|WARNING_TRANSCRIPT_NO_START_CODON),upstream_gene_variant(MODIFIER||1622||246|ecpD|protein_coding|CODING|ACT37832||1),upstream_gene_variant(MODIFIER||933||194|yadN|protein…	283	90	COG0617	J	NO	160580	161944	-	G1278A	-576.62	-572.95	2.8147e-17	3.18212e-17	372.74	380.38	0.5764	0.1772	1087-1188	0.1332	-0.3359	1127-1181	0.0196	0.983019	0.912969
175661	C	T	SNP	missense_variant	MODERATE	gCa/gTa	p.Ala453Val/c.1358C>T	fhuB	EFF=missense_variant(MODERATE|MISSENSE|gCa/gTa|p.Ala453Val/c.1358C>T|660|fhuB|protein_coding|CODING|ACT37845|1|1|WARNING_TRANSCRIPT_NO_START_CODON),upstream_gene_variant(MODIFIER||2288||473|yadQ|protein_coding|CODING|ACT37847||1),upstream_gene_variant(MODIFIER||3791||114|yadR|protein_coding|CODING|ACT37848||1),downstream_gene_variant(MODIFIER||783||426|hemL|protein_coding|CODING|ACT37846||1),down…	31	32	COG0609	P	NO	174304	176286	+	C1358T	-1044.37	-1041.69	4.87163e-24	5.31197e-24	286.82	286.55	0.6085	0.244	1324-1373	0.0903	-0.1988	1324-1373	0.0433	0.965305	0.965885
180055	C	G	SNP	missense_variant	MODERATE	Gcc/Ccc	p.Ala138Pro/c.412G>C	yadS	EFF=missense_variant(MODERATE|MISSENSE|Gcc/Ccc|p.Ala138Pro/c.412G>C|207|yadS|protein_coding|CODING|ACT37849|1|1),upstream_gene_variant(MODIFIER||2024||505|dgt|protein_coding|CODING|ACT37852||1),upstream_gene_variant(MODIFIER||2331||426|hemL|protein_coding|CODING|ACT37846||1),upstream_gene_variant(MODIFIER||3671||474|degP|protein_coding|CODING|ACT37853||1),downstream_gene_variant(MODIFIER||449||26…	60	44	COG2860	S	NO	179843	180466	-	C238T-G412C	-278.08	-277.95	2.164e-08	1.78491e-08	167.92	144.19	0.5374	0.0367	122-464	0.584	0.7697	414-463	0.5036	0.980677	0.835722
180229	G	A	SNP	missense_variant	MODERATE	Cgc/Tgc	p.Arg80Cys/c.238C>T	yadS	EFF=missense_variant(MODERATE|MISSENSE|Cgc/Tgc|p.Arg80Cys/c.238C>T|207|yadS|protein_coding|CODING|ACT37849|1|1),upstream_gene_variant(MODIFIER||1850||505|dgt|protein_coding|CODING|ACT37852||1),upstream_gene_variant(MODIFIER||2505||426|hemL|protein_coding|CODING|ACT37846||1),upstream_gene_variant(MODIFIER||3497||474|degP|protein_coding|CODING|ACT37853||1),downstream_gene_variant(MODIFIER||275||266…	60	44	COG2860	S	NO	179843	180466	-	C238T-G412C	-278.08	-277.95	2.164e-08	1.78491e-08	167.92	144.19	0.5374	0.0367	122-464	0.584	0.7697	414-463	0.5036	0.980677	0.835722
183583	C	T	SNP	missense_variant	MODERATE	gCc/gTc	p.Ala502Val/c.1505C>T	dgt	EFF=missense_variant(MODERATE|MISSENSE|gCc/gTc|p.Ala502Val/c.1505C>T|505|dgt|protein_coding|CODING|ACT37852|1|1),upstream_gene_variant(MODIFIER||143||474|degP|protein_coding|CODING|ACT37853||1),upstream_gene_variant(MODIFIER||1722||385|cdaR|protein_coding|CODING|ACT37854||1),upstream_gene_variant(MODIFIER||3117||207|yadS|protein_coding|CODING|ACT37849||1),upstream_gene_variant(MODIFIER||2279||266…	217	122	NA	NA	NO	182079	183596	+	C1505T	-553.88	-553.62	1.20218e-17	1.87008e-17	345.72	424.87	0.4953	0.1651	1340-1511	0.0711	0.1209	1342-1391	0.0444	0.999621	0.998465
184571	A	G	SNP	synonymous_variant	LOW	gaA/gaG	p.Glu282Glu/c.846A>G	degP	EFF=synonymous_variant(LOW|SILENT|gaA/gaG|p.Glu282Glu/c.846A>G|474|degP|protein_coding|CODING|ACT37853|1|1),upstream_gene_variant(MODIFIER||734||385|cdaR|protein_coding|CODING|ACT37854||1),upstream_gene_variant(MODIFIER||4105||207|yadS|protein_coding|CODING|ACT37849||1),upstream_gene_variant(MODIFIER||3267||266|yadT|protein_coding|CODING|ACT37850||1),upstream_gene_variant(MODIFIER||2576||232|pfs|…	159	129	COG0265	O	NO	183726	185150	+	A846G	-621.62	-621.46	2.88794e-11	2.818e-11	236.31	237.75	0.5436	0.028	678-796	0.651	0.9292	709-779	0.7426	0.999233	0.995809
190450	C	T	SNP	missense_variant	MODERATE	cGt/cAt	p.Arg348His/c.1043G>A	glnD	EFF=missense_variant(MODERATE|MISSENSE|cGt/cAt|p.Arg348His/c.1043G>A|890|glnD|protein_coding|CODING|ACT37858|1|1),upstream_gene_variant(MODIFIER||3513||128|yaeH|protein_coding|CODING|ACT37855||1),upstream_gene_variant(MODIFIER||2266||241|rpsB|protein_coding|CODING|ACT37860||1),upstream_gene_variant(MODIFIER||2539||270|yaeI|protein_coding|CODING|ACT37856||1),upstream_gene_variant(MODIFIER||3249||2…	40	62	COG2844	O	NO	188820	191492	-	G1043A	-1043.26	-1041.37	7.43797e-28	2.12955e-29	659.94	481.49	0.5436	0.1176	1042-1100	0.2397	0.1744	1042-1100	0.1269	0.977863	0.969783
191867	C	T	SNP	missense_variant	MODERATE	gGc/gAc	p.Gly161Asp/c.482G>A	map	EFF=missense_variant(MODERATE|MISSENSE|gGc/gAc|p.Gly161Asp/c.482G>A|264|map|protein_coding|CODING|ACT37859|1|1),upstream_gene_variant(MODIFIER||4930||128|yaeH|protein_coding|CODING|ACT37855||1),upstream_gene_variant(MODIFIER||849||241|rpsB|protein_coding|CODING|ACT37860||1),upstream_gene_variant(MODIFIER||3956||270|yaeI|protein_coding|CODING|ACT37856||1),upstream_gene_variant(MODIFIER||1832||283|…	586	231	COG0024	J	YES	191554	192348	-	G482A	-306.95	-303.54	2.56244e-08	3.60697e-09	135.19	184.42	0.5062	0.1373	472-531	0.1968	0.5788	472-523	0.3307	0.933918	0.854396
196671	C	T	SNP	synonymous_variant	LOW	ggC/ggT	p.Gly103Gly/c.309C>T	ispC	EFF=synonymous_variant(LOW|SILENT|ggC/ggT|p.Gly103Gly/c.309C>T|398|ispC|protein_coding|CODING|ACT37864|1|1),upstream_gene_variant(MODIFIER||4323||264|map|protein_coding|CODING|ACT37859||1),upstream_gene_variant(MODIFIER||1074||253|uppS|protein_coding|CODING|ACT37865||1|WARNING_TRANSCRIPT_NO_START_CODON),upstream_gene_variant(MODIFIER||1848||285|cdsA|protein_coding|CODING|ACT37866||1),upstream_gen…	30	32	COG0743	I	YES	196363	197559	+	C309T	-478.92	-477.54	4.00048e-15	1.82011e-15	241.1	294.97	0.5037	0.0055	208-327	0.8956	0.9923	224-319	0.9308	0.964663	0.891179
203883	T	C	SNP	missense_variant	MODERATE	gTc/gCc	p.Val24Ala/c.71T>C	lpxD	EFF=missense_variant(MODERATE|MISSENSE|gTc/gCc|p.Val24Ala/c.71T>C|341|lpxD|protein_coding|CODING|ACT37870|1|1),upstream_gene_variant(MODIFIER||1060||151|fabZ|protein_coding|CODING|ACT37871||1),upstream_gene_variant(MODIFIER||1519||262|lpxA|protein_coding|CODING|ACT37872||1|WARNING_TRANSCRIPT_NO_START_CODON),upstream_gene_variant(MODIFIER||2307||382|lpxB|protein_coding|CODING|ACT37873||1),upstream…	1286	314	COG1044	M	YES	203813	204838	+	T71C	-445.47	-448.35	6.57753e-10	6.5596e-10	83.84	83.84	0.5129	0	34-83	1	1	3-255	0.9999	1	1
206354	C	T	SNP	synonymous_variant	LOW	taC/taT	p.Tyr55Tyr/c.165C>T	lpxB	EFF=synonymous_variant(LOW|SILENT|taC/taT|p.Tyr55Tyr/c.165C>T|382|lpxB|protein_coding|CODING|ACT37873|1|1),upstream_gene_variant(MODIFIER||981||198|rnhB|protein_coding|CODING|ACT37874||1),upstream_gene_variant(MODIFIER||1614||1160|dnaE|protein_coding|CODING|ACT37875||1),downstream_gene_variant(MODIFIER||3152||810|yaeT|protein_coding|CODING|ACT37868||1),downstream_gene_variant(MODIFIER||2545||161|…	422	121	COG0763	M	YES	206190	207338	+	C165T	-516.61	-514.59	9.11799e-14	9.17831e-14	121.96	121.97	0.5151	0.0021	97-240	0.9564	0.9968	96-161	0.9643	0.999999	0.99991
214151	C	T	SNP	missense_variant	MODERATE	aCc/aTc	p.Thr544Ile/c.1631C>T	ldcC	EFF=missense_variant(MODERATE|MISSENSE|aCc/aTc|p.Thr544Ile/c.1631C>T|713|ldcC|protein_coding|CODING|ACT37877|1|1),upstream_gene_variant(MODIFIER||568||129|yaeR|protein_coding|CODING|ACT37878||1),upstream_gene_variant(MODIFIER||1022||432|tilS|protein_coding|CODING|ACT37879||1),upstream_gene_variant(MODIFIER||2982||181|yaeQ|protein_coding|CODING|ACT37882||1),upstream_gene_variant(MODIFIER||3524||14…	14	74	COG1982	E	NO	212521	214662	+	C1631T	-857.78	-856.07	1.42179e-23	4.34907e-23	337.6	354.27	0.4838	0.099	1605-1654	0.2284	0.5795	1627-1693	0.2964	0.951308	0.837788
215617	A	G	SNP	missense_variant	MODERATE	Aca/Gca	p.Thr149Ala/c.445A>G	tilS	EFF=missense_variant(MODERATE|MISSENSE|Aca/Gca|p.Thr149Ala/c.445A>G|432|tilS|protein_coding|CODING|ACT37879|1|1),upstream_gene_variant(MODIFIER||1516||181|yaeQ|protein_coding|CODING|ACT37882||1),upstream_gene_variant(MODIFIER||2058||140|yaeJ|protein_coding|CODING|ACT37883||1),upstream_gene_variant(MODIFIER||2494||236|cutF|protein_coding|CODING|ACT37884||1),downstream_gene_variant(MODIFIER||4167||…	31	24	COG0037	D	YES	215173	216471	+	A445G	-626.03	-626.92	1.53894e-13	2.0193e-13	390.45	359.59	0.591	0.0005	431-480	0.9844	0.9981	436-485	0.9705	0.993231	0.96872
216497	A	G	SNP	upstream_gene_variant	MODIFIER	.	.	.	EFF=upstream_gene_variant(MODIFIER||636||181|yaeQ|protein_coding|CODING|ACT37882||1),upstream_gene_variant(MODIFIER||1178||140|yaeJ|protein_coding|CODING|ACT37883||1),upstream_gene_variant(MODIFIER||1614||236|cutF|protein_coding|CODING|ACT37884||1),downstream_gene_variant(MODIFIER||23||84|rof|protein_coding|CODING|ACT37880||1),downstream_gene_variant(MODIFIER||270||66|yaeP|protein_coding|CODING|A…	.	.	NA	NA	.	.	.	.	.	.	.	.	.	.	.	.	.	.	.	.	.	.	.	.
226319	G	A	SNP	upstream_gene_variant	MODIFIER	.	.	.	EFF=upstream_gene_variant(MODIFIER||290|||rrsH|rRNA|NON_CODING|ECB_r00001||1),upstream_gene_variant(MODIFIER||4703||572|proS|protein_coding|CODING|ACT37886||1),upstream_gene_variant(MODIFIER||3885||235|yaeB|protein_coding|CODING|ACT37887||1),upstream_gene_variant(MODIFIER||3484||134|rcsF|protein_coding|CODING|ACT37888||1),upstream_gene_variant(MODIFIER||1900|||ileV|tRNA|NON_CODING|ECB_t00001||1),…	.	.	NA	NA	.	.	.	.	.	.	.	.	.	.	.	.	.	.	.	.	.	.	.	.
233299	GG	G	DEL	frameshift_variant	HIGH	tcc/	p.Ser169fs/c.506delC	yafC	EFF=frameshift_variant(HIGH||tcc/|p.Ser169fs/c.506delC|304|yafC|protein_coding|CODING|ACT37894|1|1),upstream_gene_variant(MODIFIER||746||266|yafD|protein_coding|CODING|ACT37895||1|WARNING_TRANSCRIPT_NO_START_CODON),upstream_gene_variant(MODIFIER||1550||207|yafE|protein_coding|CODING|ACT37896||1),upstream_gene_variant(MODIFIER||4440||240|yafS|protein_coding|CODING|ACT37899||1),downstream_gene_vari…	23	38	COG0583	K	NO	.	.	.	.	.	.	.	.	.	.	.	.	.	.	.	.	.	.	.
239569	A	G	SNP	synonymous_variant	LOW	acA/acG	p.Thr193Thr/c.579A>G	dnaQ	EFF=synonymous_variant(LOW|SILENT|acA/acG|p.Thr193Thr/c.579A>G|243|dnaQ|protein_coding|CODING|ACT37901|1|1),upstream_gene_variant(MODIFIER||286|||aspV|tRNA|NON_CODING|ECB_t00004||1),upstream_gene_variant(MODIFIER||692||261|yafT|protein_coding|CODING|ACT37902||1),upstream_gene_variant(MODIFIER||1743||91|insA-2|protein_coding|CODING|ACT37903||1|WARNING_TRANSCRIPT_NO_START_CODON),upstream_gene_varia…	141	146	COG0847	L	NO	238991	239722	+	A579G	-287.79	-289.93	3.22968e-09	4.76292e-09	222.11	125.34	0.5198	0.037	573-622	0.5918	0.8334	576-625	0.5878	0.929148	0.936551
242201	GGG	G	DEL	frameshift_variant	HIGH	ggggca/	p.Gly64fs/c.192_193delGG	ECB_00212	EFF=frameshift_variant(HIGH||ggggca/|p.Gly64fs/c.192_193delGG|123|ECB_00212|protein_coding|CODING|ACT37905|1|1),upstream_gene_variant(MODIFIER||4496||251|gloB|protein_coding|CODING|ACT37898||1),upstream_gene_variant(MODIFIER||611||378|yhhI-1|protein_coding|CODING|ACT37906||1),upstream_gene_variant(MODIFIER||3276||155|rnhA|protein_coding|CODING|ACT37900||1),upstream_gene_variant(MODIFIER||2712||15…	NA	NA	NA	NA	NO	.	.	.	.	.	.	.	.	.	.	.	.	.	.	.	.	.	.	.
243531	T	C	SNP	missense_variant	MODERATE	gTt/gCt	p.Val240Ala/c.719T>C	yhhI-1	EFF=missense_variant(MODERATE|MISSENSE|gTt/gCt|p.Val240Ala/c.719T>C|378|yhhI-1|protein_coding|CODING|ACT37906|1|1),upstream_gene_variant(MODIFIER||4605||155|rnhA|protein_coding|CODING|ACT37900||1),upstream_gene_variant(MODIFIER||1383||157|ykfE|protein_coding|CODING|ACT37908||1),upstream_gene_variant(MODIFIER||4583||192|lpcA|protein_coding|CODING|ACT37910||1),downstream_gene_variant(MODIFIER||459|…	NA	NA	NA	NA	NO	242813	243949	+	T719C	-351.56	-351.56	3.83666e-13	5.82034e-13	267.34	320.11	0.4165	0.0799	657-724	0.2907	0.6349	663-721	0.3392	0.976878	0.947707
245192	A	G	SNP	synonymous_variant	LOW	caA/caG	p.Gln93Gln/c.279A>G	ykfE	EFF=synonymous_variant(LOW|SILENT|caA/caG|p.Gln93Gln/c.279A>G|157|ykfE|protein_coding|CODING|ACT37908|1|1),upstream_gene_variant(MODIFIER||2922||192|lpcA|protein_coding|CODING|ACT37910||1),upstream_gene_variant(MODIFIER||3706||255|yafJ|protein_coding|CODING|ACT37911||1),upstream_gene_variant(MODIFIER||432||256|yafV|protein_coding|CODING|ACT37907||1|WARNING_TRANSCRIPT_NO_START_CODON),downstream_ge…	59	197	NA	NA	NO	244914	245387	+	A279G	-169.21	-171.58	2.55222e-05	2.79057e-06	167.65	162.52	0.4924	0.0893	243-292	0.2721	0.7378	237-292	0.4494	0.922464	0.88125
250990	C	T	SNP	synonymous_variant	LOW	ctG/ctA	p.Leu28Leu/c.84G>A	dinJ	EFF=synonymous_variant(LOW|SILENT|ctG/ctA|p.Leu28Leu/c.84G>A|86|dinJ|protein_coding|CODING|ACT37914|1|1),upstream_gene_variant(MODIFIER||293||249|yafL|protein_coding|CODING|ACT37915||1),upstream_gene_variant(MODIFIER||1218||165|yafM|protein_coding|CODING|ACT37916||1),upstream_gene_variant(MODIFIER||3116||814|fadE|protein_coding|CODING|ACT37909||1),upstream_gene_variant(MODIFIER||614||246|yafK|pro…	187	345	COG3077	L	NO	250813	251073	-	G84A	-80.42	-80.42	0.000644348	0.000643593	87.83	88.07	0.4674	0	13-132	0.9999	1	7-116	0.999	0.999998	0.999972
268653	C	T	SNP	synonymous_variant	LOW	gcG/gcA	p.Ala86Ala/c.258G>A	yagQ	EFF=synonymous_variant(LOW|SILENT|gcG/gcA|p.Ala86Ala/c.258G>A|318|yagQ|protein_coding|CODING|ACT37933|1|1),upstream_gene_variant(MODIFIER||4061||345|phoE|protein_coding|CODING|ACT37929||1),upstream_gene_variant(MODIFIER||678||136|yagP|protein_coding|CODING|ACT37932||1),upstream_gene_variant(MODIFIER||4521||204|yagU|protein_coding|CODING|ACT37937||1),downstream_gene_variant(MODIFIER||267||732|yagR…	1	21	NA	NA	NO	267954	268910	-	G258A	-462.19	-460.56	1.11676e-09	3.37803e-10	203.26	132.96	0.6359	0.0431	255-337	0.5704	0.8817	255-337	0.6514	0.973566	0.968624
269595	T	C	SNP	synonymous_variant	LOW	ggA/ggG	p.Gly508Gly/c.1524A>G	yagR	EFF=synonymous_variant(LOW|SILENT|ggA/ggG|p.Gly508Gly/c.1524A>G|732|yagR|protein_coding|CODING|ACT37934|1|1),upstream_gene_variant(MODIFIER||1620||136|yagP|protein_coding|CODING|ACT37932||1),upstream_gene_variant(MODIFIER||3579||204|yagU|protein_coding|CODING|ACT37937||1),upstream_gene_variant(MODIFIER||685||318|yagQ|protein_coding|CODING|ACT37933||1),downstream_gene_variant(MODIFIER||3612||367|p…	1	21	NA	NA	NO	268920	271118	-	A1524G	-1007.97	-1011.48	6.53713e-23	3.33558e-22	379.86	458.19	0.5885	0.2091	1528-1581	0.0989	-0.0663	1531-1603	0.0635	0.992814	0.963176
275981	T	C	SNP	missense_variant	MODERATE	aAc/aGc	p.Asn340Ser/c.1019A>G	yagW	EFF=missense_variant(MODERATE|MISSENSE|aAc/aGc|p.Asn340Ser/c.1019A>G|547|yagW|protein_coding|CODING|ACT37940|1|1),upstream_gene_variant(MODIFIER||4863||732|yagR|protein_coding|CODING|ACT37934||1),upstream_gene_variant(MODIFIER||3910||318|yagS|protein_coding|CODING|ACT37935||1),upstream_gene_variant(MODIFIER||3224||229|yagT|protein_coding|CODING|ACT37936||1),upstream_gene_variant(MODIFIER||1617||1…	4	42	NA	NA	NO	275356	276999	-	G89A-A1019G	-628.23	-628.23	4.66723e-17	3.11131e-16	275.68	229.98	0.5103	0.128	26-76	0.224	0.299	21-70	0.1761	0.960764	0.880206
276911	C	T	SNP	stop_gained	HIGH	tGg/tAg	p.Trp30*/c.89G>A	yagW	EFF=stop_gained(HIGH|NONSENSE|tGg/tAg|p.Trp30*/c.89G>A|547|yagW|protein_coding|CODING|ACT37940|1|1),upstream_gene_variant(MODIFIER||4840||318|yagS|protein_coding|CODING|ACT37935||1),upstream_gene_variant(MODIFIER||4154||229|yagT|protein_coding|CODING|ACT37936||1),upstream_gene_variant(MODIFIER||2547||109|ykgJ|protein_coding|CODING|ACT37938||1),upstream_gene_variant(MODIFIER||1524||236|yagV|protei…	4	42	NA	NA	NO	275356	276999	-	G89A-A1019G	-628.23	-628.23	4.66723e-17	3.11131e-16	275.68	229.98	0.5103	0.128	26-76	0.224	0.299	21-70	0.1761	0.960764	0.880206
278236	C	CC	INS	frameshift_variant	HIGH	ctt/cttG	p.Leu426_Gly427fs/c.1278_1279insG	yagX	EFF=frameshift_variant(HIGH||ctt/cttG|p.Leu426_Gly427fs/c.1278_1279insG|841|yagX|protein_coding|CODING|ACT37941|1|1),upstream_gene_variant(MODIFIER||3873||109|ykgJ|protein_coding|CODING|ACT37938||1),upstream_gene_variant(MODIFIER||2850||236|yagV|protein_coding|CODING|ACT37939||1),upstream_gene_variant(MODIFIER||1238||547|yagW|protein_coding|CODING|ACT37940||1),upstream_gene_variant(MODIFIER||4055…	1	19	NA	NA	NO	.	.	.	.	.	.	.	.	.	.	.	.	.	.	.	.	.	.	.
281005	A	G	SNP	synonymous_variant	LOW	tgT/tgC	p.Cys171Cys/c.513T>C	ykgK	EFF=synonymous_variant(LOW|SILENT|tgT/tgC|p.Cys171Cys/c.513T>C|196|ykgK|protein_coding|CODING|ACT37944|1|1|WARNING_TRANSCRIPT_NO_START_CODON),upstream_gene_variant(MODIFIER||4006||547|yagW|protein_coding|CODING|ACT37940||1),upstream_gene_variant(MODIFIER||1287||75|ykgL|protein_coding|CODING|ACT37945||1),upstream_gene_variant(MODIFIER||1491||841|yagX|protein_coding|CODING|ACT37941||1),upstream_gen…	2	30	COG2771	K	NO	280927	281517	-	T513C	-178.65	-182.51	2.7434e-06	9.32004e-06	149.12	89.3	0.405	0.0269	479-529	0.6343	0.7674	473-530	0.4898	0.933394	0.855147
284330	C	CC	INS	upstream_gene_variant	MODIFIER	.	.	.	EFF=upstream_gene_variant(MODIFIER||4817||841|yagX|protein_coding|CODING|ACT37941||1),upstream_gene_variant(MODIFIER||206||1418|eaeH|protein_coding|CODING|ACT37947||1),upstream_gene_variant(MODIFIER||4123||222|yagY|protein_coding|CODING|ACT37942||1),upstream_gene_variant(MODIFIER||3430||211|yagZ|protein_coding|CODING|ACT37943||1),upstream_gene_variant(MODIFIER||2814||196|ykgK|protein_coding|CODIN…	.	.	NA	NA	.	.	.	.	.	.	.	.	.	.	.	.	.	.	.	.	.	.	.	.
292122	A	G	SNP	missense_variant	MODERATE	Ttc/Ctc	p.Phe177Leu/c.529T>C	ykgC	EFF=missense_variant(MODERATE|MISSENSE|Ttc/Ctc|p.Phe177Leu/c.529T>C|441|ykgC|protein_coding|CODING|ACT37951|1|1),upstream_gene_variant(MODIFIER||754||284|ykgD|protein_coding|CODING|ACT37952||1),upstream_gene_variant(MODIFIER||2135||239|ykgE|protein_coding|CODING|ACT37953||1|WARNING_TRANSCRIPT_NO_START_CODON),upstream_gene_variant(MODIFIER||2338||283|ykgA|protein_coding|CODING|ACT37948||1),upstrea…	2	44	COG1249	C	NO	291325	292650	-	T529C	-481.39	-476.17	2.24674e-13	4.67117e-14	247.55	301.12	0.4688	0.4092	496-551	0.0083	-0.308	464-534	0.0178	0.961842	0.875698
295780	C	T	SNP	missense_variant	MODERATE	gCa/gTa	p.Ala265Val/c.794C>T	ykgF	EFF=missense_variant(MODERATE|MISSENSE|gCa/gTa|p.Ala265Val/c.794C>T|475|ykgF|protein_coding|CODING|ACT37954|1|1),upstream_gene_variant(MODIFIER||4812||197|ykgB|protein_coding|CODING|ACT37949||1),upstream_gene_variant(MODIFIER||4564||78|ykgI|protein_coding|CODING|ACT37950||1),upstream_gene_variant(MODIFIER||627||231|ykgG|protein_coding|CODING|ACT37955||1),upstream_gene_variant(MODIFIER||3130||441|…	3	34	COG1139	C	NO	294987	296414	+	C794T	-563.39	-561.28	7.61106e-15	3.81805e-16	369.03	471.63	0.5362	0.0023	753-811	0.948	0.9877	793-858	0.9083	0.959845	0.924993
300986	T	C	SNP	missense_variant	MODERATE	Acg/Gcg	p.Thr133Ala/c.397A>G	betB	EFF=missense_variant(MODERATE|MISSENSE|Acg/Gcg|p.Thr133Ala/c.397A>G|490|betB|protein_coding|CODING|ACT37959|1|1),upstream_gene_variant(MODIFIER||1126||677|betT|protein_coding|CODING|ACT37961||1),upstream_gene_variant(MODIFIER||3717||70|ECB_00265|protein_coding|CODING|ACT37956||1),upstream_gene_variant(MODIFIER||2973||222|ykgH|protein_coding|CODING|ACT37957||1),upstream_gene_variant(MODIFIER||1090…	39	24	COG1012	C	NO	299910	301382	-	A397G	-671.98	-673.36	1.33945e-16	1.34776e-16	177.87	177.56	0.5885	0	256-396	0.9996	1	256-396	0.9978	0.999425	0.984341
305267	A	G	SNP	missense_variant	MODERATE	tAc/tGc	p.Tyr83Cys/c.248A>G	yahA	EFF=missense_variant(MODERATE|MISSENSE|tAc/tGc|p.Tyr83Cys/c.248A>G|362|yahA|protein_coding|CODING|ACT37962|1|1),upstream_gene_variant(MODIFIER||3885||490|betB|protein_coding|CODING|ACT37959||1),upstream_gene_variant(MODIFIER||3284||195|betI|protein_coding|CODING|ACT37960||1),upstream_gene_variant(MODIFIER||2662||201|yahD|protein_coding|CODING|ACT37965||1),upstream_gene_variant(MODIFIER||3307||287…	46	29	COG2771	K	NO	305020	306108	+	A248G	-411.73	-411.65	1.76968e-11	1.06089e-11	212.21	214.06	0.4638	0	224-273	0.9991	0.9999	225-274	0.9955	0.996843	0.991074
306253	T	C	SNP	missense_variant	MODERATE	cAg/cGg	p.Gln277Arg/c.830A>G	yahB	EFF=missense_variant(MODERATE|MISSENSE|cAg/cGg|p.Gln277Arg/c.830A>G|310|yahB|protein_coding|CODING|ACT37963|1|1),upstream_gene_variant(MODIFIER||4871||490|betB|protein_coding|CODING|ACT37959||1),upstream_gene_variant(MODIFIER||4270||195|betI|protein_coding|CODING|ACT37960||1),upstream_gene_variant(MODIFIER||1676||201|yahD|protein_coding|CODING|ACT37965||1),upstream_gene_variant(MODIFIER||2321||28…	8	28	COG0583	K	NO	306150	307082	-	A830G	-348.11	-350.21	1.35972e-12	2.15305e-12	206.5	230.7	0.4803	0.0291	790-846	0.612	0.8078	793-847	0.5312	0.980657	0.99072
309536	C	T	SNP	missense_variant	MODERATE	gCg/gTg	p.Ala37Val/c.110C>T	yahF	EFF=missense_variant(MODERATE|MISSENSE|gCg/gTg|p.Ala37Val/c.110C>T|515|yahF|protein_coding|CODING|ACT37967|1|1),upstream_gene_variant(MODIFIER||1438||472|yahG|protein_coding|CODING|ACT37968||1),upstream_gene_variant(MODIFIER||2454||310|yahB|protein_coding|CODING|ACT37963||1),upstream_gene_variant(MODIFIER||1865||165|yahC|protein_coding|CODING|ACT37964||1),upstream_gene_variant(MODIFIER||3278||316…	0	32	COG0074	C	NO	309427	310974	+	C110T	-671.87	-675.14	1.08686e-15	1.95944e-15	278.64	227.36	0.4903	0.046	101-150	0.4928	0.797	98-147	0.5259	0.987367	0.99698
319519	C	T	SNP	synonymous_variant	LOW	cgG/cgA	p.Arg525Arg/c.1575G>A	prpR	EFF=synonymous_variant(LOW|SILENT|cgG/cgA|p.Arg525Arg/c.1575G>A|528|prpR|protein_coding|CODING|ACT37976|1|1),upstream_gene_variant(MODIFIER||1813||296|prpB|protein_coding|CODING|ACT37977||1),upstream_gene_variant(MODIFIER||3143||389|prpC|protein_coding|CODING|ACT37978||1),upstream_gene_variant(MODIFIER||4346||483|prpD|protein_coding|CODING|ACT37979||1),upstream_gene_variant(MODIFIER||532||223|yah…	0	27	COG1221	KT	NO	319507	321093	-	T970C-G1575A	-682.27	-681.64	1.29756e-15	9.08693e-16	447.83	527.02	0.5709	0.1585	773-985	0.1599	-0.0492	822-928	0.067	0.993196	0.959881
320124	A	G	SNP	missense_variant	MODERATE	Ttt/Ctt	p.Phe324Leu/c.970T>C	prpR	EFF=missense_variant(MODERATE|MISSENSE|Ttt/Ctt|p.Phe324Leu/c.970T>C|528|prpR|protein_coding|CODING|ACT37976|1|1),upstream_gene_variant(MODIFIER||1208||296|prpB|protein_coding|CODING|ACT37977||1),upstream_gene_variant(MODIFIER||2538||389|prpC|protein_coding|CODING|ACT37978||1),upstream_gene_variant(MODIFIER||3741||483|prpD|protein_coding|CODING|ACT37979||1),upstream_gene_variant(MODIFIER||1137||22…	0	27	COG1221	KT	NO	319507	321093	-	T970C-G1575A	-682.27	-681.64	1.29756e-15	9.08693e-16	447.83	527.02	0.5709	0.1585	773-985	0.1599	-0.0492	822-928	0.067	0.993196	0.959881
324368	T	C	SNP	synonymous_variant	LOW	ggT/ggC	p.Gly168Gly/c.504T>C	prpD	EFF=synonymous_variant(LOW|SILENT|ggT/ggC|p.Gly168Gly/c.504T>C|483|prpD|protein_coding|CODING|ACT37979|1|1),upstream_gene_variant(MODIFIER||988||628|prpE|protein_coding|CODING|ACT37980||1),upstream_gene_variant(MODIFIER||3275||528|prpR|protein_coding|CODING|ACT37976||1),upstream_gene_variant(MODIFIER||3110||419|codB|protein_coding|CODING|ACT37981||1|WARNING_TRANSCRIPT_NO_START_CODON),upstream_gen…	0	23	COG2079	R	NO	323865	325316	+	T504C	-585.37	-584.43	5.85514e-15	1.4126e-14	393.74	473.85	0.6259	0.0768	305-702	0.4019	0.7843	474-702	0.5191	0.988783	0.978621
327471	G	GG	INS	upstream_gene_variant	MODIFIER	.	.	.	EFF=upstream_gene_variant(MODIFIER||6||419|codB|protein_coding|CODING|ACT37981||1|WARNING_TRANSCRIPT_NO_START_CODON),upstream_gene_variant(MODIFIER||1255||427|codA|protein_coding|CODING|ACT37982||1|WARNING_TRANSCRIPT_NO_START_CODON),upstream_gene_variant(MODIFIER||3883||219|cynT|protein_coding|CODING|ACT37984||1|WARNING_TRANSCRIPT_NO_START_CODON),upstream_gene_variant(MODIFIER||4573||156|cynS|pro…	.	.	NA	NA	.	.	.	.	.	.	.	.	.	.	.	.	.	.	.	.	.	.	.	.
339355	C	T	SNP	missense_variant	MODERATE	Gtt/Att	p.Val238Ile/c.712G>A	lacI	EFF=missense_variant(MODERATE|MISSENSE|Gtt/Att|p.Val238Ile/c.712G>A|360|lacI|protein_coding|CODING|ACT37990|1|1|WARNING_TRANSCRIPT_NO_START_CODON),upstream_gene_variant(MODIFIER||4939||203|lacA|protein_coding|CODING|ACT37987||1),upstream_gene_variant(MODIFIER||3620||417|lacY|protein_coding|CODING|ACT37988||1),upstream_gene_variant(MODIFIER||1812||554|mhpA|protein_coding|CODING|ACT37992||1),upstre…	28	40	COG1609	K	NO	338984	340066	-	G712A	-460.28	-458.47	1.78489e-10	5.37877e-11	254.32	155.82	0.5611	0.1469	551-718	0.1789	-0.0801	659-716	0.0608	0.95171	0.929083
352376	GG	G	DEL	upstream_gene_variant	MODIFIER	.	.	.	EFF=upstream_gene_variant(MODIFIER||1763||320|tauA|protein_coding|CODING|ACT38006||1),upstream_gene_variant(MODIFIER||2738||255|tauB|protein_coding|CODING|ACT38007||1),upstream_gene_variant(MODIFIER||1651||277|frmB|protein_coding|CODING|ACT38000||1),upstream_gene_variant(MODIFIER||3502||275|tauC|protein_coding|CODING|ACT38008||1),upstream_gene_variant(MODIFIER||4326||283|tauD|protein_coding|CODIN…	.	.	NA	NA	.	.	.	.	.	.	.	.	.	.	.	.	.	.	.	.	.	.	.	.
354257	C	T	SNP	stop_gained	HIGH	Cag/Tag	p.Gln40*/c.118C>T	tauA	EFF=stop_gained(HIGH|NONSENSE|Cag/Tag|p.Gln40*/c.118C>T|320|tauA|protein_coding|CODING|ACT38006|1|1),upstream_gene_variant(MODIFIER||858||255|tauB|protein_coding|CODING|ACT38007||1),upstream_gene_variant(MODIFIER||3531||277|frmB|protein_coding|CODING|ACT38000||1),upstream_gene_variant(MODIFIER||1622||275|tauC|protein_coding|CODING|ACT38008||1),upstream_gene_variant(MODIFIER||2446||283|tauD|protei…	0	22	COG4521	P	NO	354140	355102	+	C118T	-402.91	-405.97	6.21809e-10	2.92253e-10	182.22	124.08	0.5629	0.1848	114-172	0.1177	0.4322	112-170	0.2281	0.943129	0.813715
355217	C	T	SNP	missense_variant	MODERATE	Ccg/Tcg	p.Pro35Ser/c.103C>T	tauB	EFF=missense_variant(MODERATE|MISSENSE|Ccg/Tcg|p.Pro35Ser/c.103C>T|255|tauB|protein_coding|CODING|ACT38007|1|1),upstream_gene_variant(MODIFIER||4491||277|frmB|protein_coding|CODING|ACT38000||1),upstream_gene_variant(MODIFIER||662||275|tauC|protein_coding|CODING|ACT38008||1),upstream_gene_variant(MODIFIER||1486||283|tauD|protein_coding|CODING|ACT38009||1),upstream_gene_variant(MODIFIER||3289||369|…	0	23	COG4525	P	NO	355115	355882	+	C103T-A746G	-347	-344.26	7.39308e-08	3.35138e-08	304.98	281.09	0.569	0.0157	477-762	0.7919	0.9209	135-253	0.7483	0.97337	0.902389
355860	A	G	SNP	missense_variant	MODERATE	gAg/gGg	p.Glu249Gly/c.746A>G	tauB	EFF=missense_variant(MODERATE|MISSENSE|gAg/gGg|p.Glu249Gly/c.746A>G|255|tauB|protein_coding|CODING|ACT38007|1|1),upstream_gene_variant(MODIFIER||19||275|tauC|protein_coding|CODING|ACT38008||1),upstream_gene_variant(MODIFIER||843||283|tauD|protein_coding|CODING|ACT38009||1),upstream_gene_variant(MODIFIER||3932||369|frmA|protein_coding|CODING|ACT38001||1),upstream_gene_variant(MODIFIER||3622||91|fr…	0	23	COG4525	P	NO	355115	355882	+	C103T-A746G	-347	-344.26	7.39308e-08	3.35138e-08	304.98	281.09	0.569	0.0157	477-762	0.7919	0.9209	135-253	0.7483	0.97337	0.902389
358014	C	T	SNP	missense_variant	MODERATE	Gcc/Acc	p.Ala208Thr/c.622G>A	hemB	EFF=missense_variant(MODERATE|MISSENSE|Gcc/Acc|p.Ala208Thr/c.622G>A|324|hemB|protein_coding|CODING|ACT38010|1|1),upstream_gene_variant(MODIFIER||4817||257|yaiO|protein_coding|CODING|ACT38003||1),upstream_gene_variant(MODIFIER||4232||167|insB-4|protein_coding|CODING|ACT38004||1),upstream_gene_variant(MODIFIER||4038||91|insA-4|protein_coding|CODING|ACT38005||1|WARNING_TRANSCRIPT_NO_START_CODON),ups…	325	101	COG0113	H	YES	357661	358635	-	G622A	-406.06	-403.44	2.08873e-11	3.71973e-12	298.1	301.98	0.5661	0.1084	531-628	0.2634	0.5261	532-628	0.2942	0.880557	0.814272
359174	A	AA	INS	frameshift_variant	HIGH	aag/aaAg	p.Lys6_Lys7fs/c.18_19insA	yaiT	EFF=frameshift_variant(HIGH||aag/aaAg|p.Lys6_Lys7fs/c.18_19insA|968|yaiT|protein_coding|CODING|ACT38012|1|1),upstream_gene_variant(MODIFIER||2932||222|yaiV|protein_coding|CODING|ACT38013||1),upstream_gene_variant(MODIFIER||540||324|hemB|protein_coding|CODING|ACT38010||1),upstream_gene_variant(MODIFIER||153||65|ECB_00320|protein_coding|CODING|ACT38011||1|WARNING_TRANSCRIPT_NO_START_CODON),downstre…	NA	NA	NA	NA	NO	.	.	.	.	.	.	.	.	.	.	.	.	.	.	.	.	.	.	.
363703	C	T	SNP	synonymous_variant	LOW	ccG/ccA	p.Pro77Pro/c.231G>A	ampH	EFF=synonymous_variant(LOW|SILENT|ccG/ccA|p.Pro77Pro/c.231G>A|385|ampH|protein_coding|CODING|ACT38014|1|1),upstream_gene_variant(MODIFIER||4681||65|ECB_00320|protein_coding|CODING|ACT38011||1|WARNING_TRANSCRIPT_NO_START_CODON),upstream_gene_variant(MODIFIER||582||406|sbmA|protein_coding|CODING|ACT38015||1),upstream_gene_variant(MODIFIER||1815||364|yaiW|protein_coding|CODING|ACT38016||1),upstream_…	47	52	COG1680	V	NO	362776	363933	-	G231A	-497.62	-497.28	6.10881e-12	5.78034e-12	299.54	295.35	0.5561	0.0043	224-307	0.9148	0.989	226-305	0.9145	0.998412	0.977138
372726	C	T	SNP	missense_variant	MODERATE	Gcc/Acc	p.Ala189Thr/c.565G>A	proC	EFF=missense_variant(MODERATE|MISSENSE|Gcc/Acc|p.Ala189Thr/c.565G>A|269|proC|protein_coding|CODING|ACT38024|1|1),upstream_gene_variant(MODIFIER||684||152|yaiI|protein_coding|CODING|ACT38025||1),upstream_gene_variant(MODIFIER||4157||364|ddlA|protein_coding|CODING|ACT38019||1),upstream_gene_variant(MODIFIER||1325||174|aroL|protein_coding|CODING|ACT38026||1),upstream_gene_variant(MODIFIER||1899||63|…	65	82	COG0345	E	NO	372481	373290	-	G565A	-334.62	-335.14	5.5038e-10	5.6045e-10	196.37	193.4	0.5736	0.065	527-576	0.4197	0.6515	527-578	0.3879	0.997114	0.964226
379321	G	GGG	INS	frameshift_variant	HIGH	ggc/ggGGc	p.Gly252_Gly253fs/c.756_757insGG	yajF	EFF=frameshift_variant(HIGH||ggc/ggGGc|p.Gly252_Gly253fs/c.756_757insGG|302|yajF|protein_coding|CODING|ACT38034|1|1|WARNING_TRANSCRIPT_NO_START_CODON),upstream_gene_variant(MODIFIER||2055||167|insB-5|protein_coding|CODING|ACT38031||1),upstream_gene_variant(MODIFIER||1861||91|insA-5|protein_coding|CODING|ACT38032||1|WARNING_TRANSCRIPT_NO_START_CODON),upstream_gene_variant(MODIFIER||880||303|rdgC|p…	14	48	COG1940	KG	NO	.	.	.	.	.	.	.	.	.	.	.	.	.	.	.	.	.	.	.
381072	G	A	SNP	synonymous_variant	LOW	ggC/ggT	p.Gly1035Gly/c.3105C>T	sbcC	EFF=synonymous_variant(LOW|SILENT|ggC/ggT|p.Gly1035Gly/c.3105C>T|1048|sbcC|protein_coding|CODING|ACT38036|1|1),upstream_gene_variant(MODIFIER||3805||167|insB-5|protein_coding|CODING|ACT38031||1),upstream_gene_variant(MODIFIER||3611||91|insA-5|protein_coding|CODING|ACT38032||1|WARNING_TRANSCRIPT_NO_START_CODON),upstream_gene_variant(MODIFIER||2630||303|rdgC|protein_coding|CODING|ACT38033||1),upstr…	28	31	COG0419	L	NO	381030	384176	-	C3105T	-1247.72	-1248.45	1.31885e-31	4.0569e-32	596.21	559.87	0.4938	0.1104	3079-3133	0.2245	0.5428	3079-3141	0.2875	0.979876	0.952715
386225	A	G	SNP	missense_variant	MODERATE	Aca/Gca	p.Thr221Ala/c.661A>G	phoB	EFF=missense_variant(MODERATE|MISSENSE|Aca/Gca|p.Thr221Ala/c.661A>G|229|phoB|protein_coding|CODING|ACT38038|1|1),upstream_gene_variant(MODIFIER||87||431|phoR|protein_coding|CODING|ACT38039||1|WARNING_TRANSCRIPT_NO_START_CODON),upstream_gene_variant(MODIFIER||1789||439|brnQ|protein_coding|CODING|ACT38040||1),upstream_gene_variant(MODIFIER||2049||1048|sbcC|protein_coding|CODING|ACT38036||1),upstrea…	26	54	COG0745	TK	NO	385565	386254	+	A661G	-278.51	-278.51	9.14604e-09	8.73128e-09	195.44	220.5	0.5304	0.0884	466-684	0.2905	0.4701	468-542	0.2159	0.999913	0.99889
389134	C	T	SNP	missense_variant	MODERATE	cCg/cTg	p.Pro374Leu/c.1121C>T	brnQ	EFF=missense_variant(MODERATE|MISSENSE|cCg/cTg|p.Pro374Leu/c.1121C>T|439|brnQ|protein_coding|CODING|ACT38040|1|1),upstream_gene_variant(MODIFIER||4958||1048|sbcC|protein_coding|CODING|ACT38036||1),upstream_gene_variant(MODIFIER||275||457|proY|protein_coding|CODING|ACT38041||1),upstream_gene_variant(MODIFIER||3759||400|sbcD|protein_coding|CODING|ACT38037||1),upstream_gene_variant(MODIFIER||1804||6…	131	40	COG1114	E	NO	388014	389333	+	C1121T	-581.6	-586.51	4.31029e-14	2.22165e-13	320.36	256.34	0.5375	0.2618	1103-1158	0.0567	0.4307	1110-1159	0.2295	0.810751	0.743682
389923	T	C	SNP	missense_variant	MODERATE	aTc/aCc	p.Ile172Thr/c.515T>C	proY	EFF=missense_variant(MODERATE|MISSENSE|aTc/aCc|p.Ile172Thr/c.515T>C|457|proY|protein_coding|CODING|ACT38041|1|1),upstream_gene_variant(MODIFIER||4548||400|sbcD|protein_coding|CODING|ACT38037||1),upstream_gene_variant(MODIFIER||1015||605|malZ|protein_coding|CODING|ACT38042||1),upstream_gene_variant(MODIFIER||3511||356|queA|protein_coding|CODING|ACT38043||1),upstream_gene_variant(MODIFIER||4637||37…	94	39	COG1113	E	NO	389409	390782	+	T515C	-597.41	-596.96	1.38428e-15	1.98577e-14	375.3	474.95	0.5212	0.0479	515-565	0.5103	0.8922	515-564	0.6724	0.992449	0.967346
394955	C	T	SNP	synonymous_variant	LOW	taC/taT	p.Tyr132Tyr/c.396C>T	tgt	EFF=synonymous_variant(LOW|SILENT|taC/taT|p.Tyr132Tyr/c.396C>T|375|tgt|protein_coding|CODING|ACT38044|1|1),upstream_gene_variant(MODIFIER||755||110|yajC|protein_coding|CODING|ACT38045||1),upstream_gene_variant(MODIFIER||1115||615|secD|protein_coding|CODING|ACT38046||1|WARNING_TRANSCRIPT_NO_START_CODON),upstream_gene_variant(MODIFIER||2973||323|secF|protein_coding|CODING|ACT38047||1|WARNING_TRANSC…	888	352	COG0343	J	NO	394560	395687	+	C396T	-455.61	-455.39	3.83765e-13	2.82275e-13	209.11	215.43	0.5012	0.0002	332-431	0.9927	0.9995	334-430	0.9863	0.99934	0.99387
402650	A	G	SNP	synonymous_variant	LOW	gaA/gaG	p.Glu258Glu/c.774A>G	ribD	EFF=synonymous_variant(LOW|SILENT|gaA/gaG|p.Glu258Glu/c.774A>G|367|ribD|protein_coding|CODING|ACT38052|1|1|WARNING_TRANSCRIPT_NO_START_CODON),upstream_gene_variant(MODIFIER||419||156|ribH|protein_coding|CODING|ACT38053||1),upstream_gene_variant(MODIFIER||909||139|nusB|protein_coding|CODING|ACT38054||1|WARNING_TRANSCRIPT_NO_START_CODON),upstream_gene_variant(MODIFIER||1406||325|thiL|protein_coding…	144	88	COG0117	H	YES	401877	402980	+	A774G	-468.24	-471.5	4.40668e-11	1.25572e-10	412.4	433.46	0.5411	0.0666	719-786	0.4119	0.7747	709-785	0.5092	0.989898	0.970234
403036	C	CC	INS	upstream_gene_variant	MODIFIER	.	.	.	EFF=upstream_gene_variant(MODIFIER||32||156|ribH|protein_coding|CODING|ACT38053||1),upstream_gene_variant(MODIFIER||522||139|nusB|protein_coding|CODING|ACT38054||1|WARNING_TRANSCRIPT_NO_START_CODON),upstream_gene_variant(MODIFIER||1019||325|thiL|protein_coding|CODING|ACT38055||1),upstream_gene_variant(MODIFIER||1974||172|pgpA|protein_coding|CODING|ACT38056||1),upstream_gene_variant(MODIFIER||2602…	.	.	NA	NA	.	.	.	.	.	.	.	.	.	.	.	.	.	.	.	.	.	.	.	.
409646	T	C	SNP	synonymous_variant	LOW	gaA/gaG	p.Glu40Glu/c.120A>G	xseB	EFF=synonymous_variant(LOW|SILENT|gaA/gaG|p.Glu40Glu/c.120A>G|80|xseB|protein_coding|CODING|ACT38060|1|1),upstream_gene_variant(MODIFIER||325||482|thiI|protein_coding|CODING|ACT38061||1),upstream_gene_variant(MODIFIER||3089||324|yajO|protein_coding|CODING|ACT38057||1),upstream_gene_variant(MODIFIER||3459||163|yajQ|protein_coding|CODING|ACT38064||1),upstream_gene_variant(MODIFIER||1047||620|dxs|pr…	159	89	COG1722	L	NO	409523	409765	-	A120G	-84.2	-87.06	0.00270347	0.00278822	35.62	24.68	0.5514	0.3023	25-151	0.0433	-0.349	79-142	0.0214	0.615931	0.575945
422600	G	GGG	INS	upstream_gene_variant	MODIFIER	.	.	.	EFF=upstream_gene_variant(MODIFIER||4193||296|cyoE|protein_coding|CODING|ACT38069||1),upstream_gene_variant(MODIFIER||3852||109|cyoD|protein_coding|CODING|ACT38070||1),upstream_gene_variant(MODIFIER||3238||204|cyoC|protein_coding|CODING|ACT38071||1),upstream_gene_variant(MODIFIER||2576||105|bolA|protein_coding|CODING|ACT38076||1),upstream_gene_variant(MODIFIER||3237||432|tig|protein_coding|CODING…	.	.	NA	NA	.	.	.	.	.	.	.	.	.	.	.	.	.	.	.	.	.	.	.	.
427313	A	G	SNP	upstream_gene_variant	MODIFIER	.	.	.	EFF=upstream_gene_variant(MODIFIER||5000||315|cyoA|protein_coding|CODING|ACT38073||1),upstream_gene_variant(MODIFIER||69||207|clpP|protein_coding|CODING|ACT38078||1),upstream_gene_variant(MODIFIER||818||424|clpX|protein_coding|CODING|ACT38079||1),upstream_gene_variant(MODIFIER||3063||491|ampG|protein_coding|CODING|ACT38074||1),upstream_gene_variant(MODIFIER||2441||192|yajG|protein_coding|CODING|A…	.	.	NA	NA	.	.	.	.	.	.	.	.	.	.	.	.	.	.	.	.	.	.	.	.
430852	C	T	SNP	upstream_gene_variant	MODIFIER	.	.	.	EFF=upstream_gene_variant(MODIFIER||91||784|lon|protein_coding|CODING|ACT38081||1),upstream_gene_variant(MODIFIER||2654||90|hupB|protein_coding|CODING|ACT38082||1|WARNING_TRANSCRIPT_NO_START_CODON),upstream_gene_variant(MODIFIER||3118||623|ppiD|protein_coding|CODING|ACT38083||1),upstream_gene_variant(MODIFIER||65||370|insL-2|protein_coding|CODING|ACT38080||1),downstream_gene_variant(MODIFIER||371…	.	.	NA	NA	.	.	.	.	.	.	.	.	.	.	.	.	.	.	.	.	.	.	.	.
434458	A	G	SNP	synonymous_variant	LOW	caA/caG	p.Gln163Gln/c.489A>G	ppiD	EFF=synonymous_variant(LOW|SILENT|caA/caG|p.Gln163Gln/c.489A>G|623|ppiD|protein_coding|CODING|ACT38083|1|1),upstream_gene_variant(MODIFIER||3671||370|insL-2|protein_coding|CODING|ACT38080||1),upstream_gene_variant(MODIFIER||1534||123|ybaV|protein_coding|CODING|ACT38084||1),upstream_gene_variant(MODIFIER||2011||132|ybaW|protein_coding|CODING|ACT38085||1),downstream_gene_variant(MODIFIER||2461||231…	298	144	COG0760	O	NO	433970	435841	+	A489G-C708T	-743.17	-744.89	8.28476e-18	5.53508e-18	520.63	537.91	0.5323	0.0469	485-541	0.5163	0.5935	485-550	0.3415	0.983786	0.947071
434677	C	T	SNP	synonymous_variant	LOW	atC/atT	p.Ile236Ile/c.708C>T	ppiD	EFF=synonymous_variant(LOW|SILENT|atC/atT|p.Ile236Ile/c.708C>T|623|ppiD|protein_coding|CODING|ACT38083|1|1),upstream_gene_variant(MODIFIER||3890||370|insL-2|protein_coding|CODING|ACT38080||1),upstream_gene_variant(MODIFIER||1315||123|ybaV|protein_coding|CODING|ACT38084||1),upstream_gene_variant(MODIFIER||1792||132|ybaW|protein_coding|CODING|ACT38085||1),upstream_gene_variant(MODIFIER||4802||272|c…	298	144	COG0760	O	NO	433970	435841	+	A489G-C708T	-743.17	-744.89	8.28476e-18	5.53508e-18	520.63	537.91	0.5323	0.0469	485-541	0.5163	0.5935	485-550	0.3415	0.983786	0.947071
438383	G	A	SNP	stop_gained	HIGH	Cag/Tag	p.Gln333*/c.997C>T	ybaE	EFF=stop_gained(HIGH|NONSENSE|Cag/Tag|p.Gln333*/c.997C>T|566|ybaE|protein_coding|CODING|ACT38087|1|1),upstream_gene_variant(MODIFIER||1096||272|cof|protein_coding|CODING|ACT38088||1),upstream_gene_variant(MODIFIER||2067||152|ybaO|protein_coding|CODING|ACT38089||1),upstream_gene_variant(MODIFIER||2555||590|mdlA|protein_coding|CODING|ACT38090||1|WARNING_TRANSCRIPT_NO_START_CODON),upstream_gene_vari…	2	42	COG4533	R	NO	437679	439379	-	G298A-C997T	-660.54	-660.2	5.03642e-17	5.04421e-17	437.66	436.6	0.5327	0.0501	279-328	0.4976	0.7697	268-319	0.5036	0.970122	0.974158
439082	C	T	SNP	missense_variant	MODERATE	Gcc/Acc	p.Ala100Thr/c.298G>A	ybaE	EFF=missense_variant(MODERATE|MISSENSE|Gcc/Acc|p.Ala100Thr/c.298G>A|566|ybaE|protein_coding|CODING|ACT38087|1|1),upstream_gene_variant(MODIFIER||397||272|cof|protein_coding|CODING|ACT38088||1),upstream_gene_variant(MODIFIER||1368||152|ybaO|protein_coding|CODING|ACT38089||1),upstream_gene_variant(MODIFIER||1856||590|mdlA|protein_coding|CODING|ACT38090||1|WARNING_TRANSCRIPT_NO_START_CODON),upstream…	2	42	COG4533	R	NO	437679	439379	-	G298A-C997T	-660.54	-660.2	5.03642e-17	5.04421e-17	437.66	436.6	0.5327	0.0501	279-328	0.4976	0.7697	268-319	0.5036	0.970122	0.974158
444489	C	T	SNP	upstream_gene_variant	MODIFIER	.	.	.	EFF=upstream_gene_variant(MODIFIER||176||112|glnK|protein_coding|CODING|ACT38092||1),upstream_gene_variant(MODIFIER||544||428|amtB|protein_coding|CODING|ACT38093||1),upstream_gene_variant(MODIFIER||2957||190|ybaY|protein_coding|CODING|ACT38095||1),upstream_gene_variant(MODIFIER||4250||117|ybaA|protein_coding|CODING|ACT38097||1),downstream_gene_variant(MODIFIER||4192||272|cof|protein_coding|CODING…	.	.	NA	NA	.	.	.	.	.	.	.	.	.	.	.	.	.	.	.	.	.	.	.	.
444809	G	GG	INS	frameshift_variant	HIGH	gcg/gGcg	p.Ala49_Glu50fs/c.146_147insG	glnK	EFF=frameshift_variant(HIGH||gcg/gGcg|p.Ala49_Glu50fs/c.146_147insG|112|glnK|protein_coding|CODING|ACT38092|1|1),upstream_gene_variant(MODIFIER||223||428|amtB|protein_coding|CODING|ACT38093||1),upstream_gene_variant(MODIFIER||2636||190|ybaY|protein_coding|CODING|ACT38095||1),upstream_gene_variant(MODIFIER||3929||117|ybaA|protein_coding|CODING|ACT38097||1),downstream_gene_variant(MODIFIER||4513||2…	0	19	COG0347	E	NO	.	.	.	.	.	.	.	.	.	.	.	.	.	.	.	.	.	.	.
445095	G	A	SNP	missense_variant	MODERATE	atG/atA	p.Met21Ile/c.63G>A	amtB	EFF=missense_variant(MODERATE|MISSENSE|atG/atA|p.Met21Ile/c.63G>A|428|amtB|protein_coding|CODING|ACT38093|1|1),upstream_gene_variant(MODIFIER||2351||190|ybaY|protein_coding|CODING|ACT38095||1),upstream_gene_variant(MODIFIER||3644||117|ybaA|protein_coding|CODING|ACT38097||1),downstream_gene_variant(MODIFIER||4798||272|cof|protein_coding|CODING|ACT38088||1),downstream_gene_variant(MODIFIER||4187||1…	7	33	COG0004	P	NO	445033	446319	+	G63A	-600.19	-596.99	1.4335e-13	9.26571e-14	157.63	232.83	0.5209	0.003	49-235	0.9328	0.9942	49-209	0.9384	0.979867	0.980114
451211	C	T	SNP	synonymous_variant	LOW	ccG/ccA	p.Pro36Pro/c.108G>A	ylaC	EFF=synonymous_variant(LOW|SILENT|ccG/ccA|p.Pro36Pro/c.108G>A|156|ylaC|protein_coding|CODING|ACT38099|1|1),upstream_gene_variant(MODIFIER||3983||286|tesB|protein_coding|CODING|ACT38094||1),upstream_gene_variant(MODIFIER||2773||129|ybaZ|protein_coding|CODING|ACT38096||1),upstream_gene_variant(MODIFIER||527||516|ylaB|protein_coding|CODING|ACT38098||1|WARNING_TRANSCRIPT_NO_START_CODON),downstream_ge…	282	106	NA	NA	NO	450848	451318	-	G108A	-143.65	-141.51	1.04474e-06	1.60996e-06	72.64	133.81	0.4708	0.1141	43-211	0.2204	-0.1698	67-116	0.0422	0.89296	0.909627
461088	A	G	SNP	missense_variant	MODERATE	aAc/aGc	p.Asn829Ser/c.2486A>G	kefA	EFF=missense_variant(MODERATE|MISSENSE|aAc/aGc|p.Asn829Ser/c.2486A>G|1120|kefA|protein_coding|CODING|ACT38106|1|1),upstream_gene_variant(MODIFIER||4618||1049|acrB|protein_coding|CODING|ACT38103||1),upstream_gene_variant(MODIFIER||3402||397|acrA|protein_coding|CODING|ACT38104||1),upstream_gene_variant(MODIFIER||1861||125|ybaN|protein_coding|CODING|ACT38109||1),upstream_gene_variant(MODIFIER||2391|…	60	29	COG3264	M	NO	458603	461965	+	A2486G	-1418.01	-1420.9	5.44035e-35	5.98242e-35	588.45	591.61	0.5287	0.0346	2460-2509	0.5991	0.9143	2457-2506	0.7126	0.991145	0.958786
466993	C	T	SNP	synonymous_variant	LOW	ggC/ggT	p.Gly174Gly/c.522C>T	recR	EFF=synonymous_variant(LOW|SILENT|ggC/ggT|p.Gly174Gly/c.522C>T|201|recR|protein_coding|CODING|ACT38113|1|1),upstream_gene_variant(MODIFIER||194||624|htpG|protein_coding|CODING|ACT38114||1),upstream_gene_variant(MODIFIER||4655||53|ybaM|protein_coding|CODING|ACT38107||1),upstream_gene_variant(MODIFIER||4114||175|priC|protein_coding|CODING|ACT38108||1|WARNING_TRANSCRIPT_NO_START_CODON),upstream_gene…	243	89	COG0353	L	NO	466472	467077	+	C522T	-289.43	-287.33	9.59408e-05	9.71242e-05	43.79	43.62	0.5509	0	324-436	0.9998	1	325-385	0.9983	0.999999	0.999955
467322	C	T	SNP	synonymous_variant	LOW	Ctg/Ttg	p.Leu46Leu/c.136C>T	htpG	EFF=synonymous_variant(LOW|SILENT|Ctg/Ttg|p.Leu46Leu/c.136C>T|624|htpG|protein_coding|CODING|ACT38114|1|1),upstream_gene_variant(MODIFIER||4984||53|ybaM|protein_coding|CODING|ACT38107||1),upstream_gene_variant(MODIFIER||4443||175|priC|protein_coding|CODING|ACT38108||1|WARNING_TRANSCRIPT_NO_START_CODON),upstream_gene_variant(MODIFIER||1920||214|adk|protein_coding|CODING|ACT38115||1),upstream_gene_…	823	480	COG0326	O	NO	467187	469061	+	C136T	-754.78	-756.15	4.0965e-19	5.52735e-19	266.43	272.95	0.5089	0.0381	96-145	0.5619	0.9076	124-230	0.6876	0.996685	0.989209
474382	CGTCGCCAGC	C	DEL	inframe_deletion	MODERATE	gtgctggcgacg/gtg	p.Val305_Thr308del/c.915_923delGCTGGCGAC	ybaL	EFF=inframe_deletion(MODERATE||gtgctggcgacg/gtg|p.Val305_Thr308del/c.915_923delGCTGGCGAC|558|ybaL|protein_coding|CODING|ACT38119|1|1),upstream_gene_variant(MODIFIER||2598||550|ushA|protein_coding|CODING|ACT38121||1),upstream_gene_variant(MODIFIER||2343||319|aes|protein_coding|CODING|ACT38117||1),downstream_gene_variant(MODIFIER||4497||214|adk|protein_coding|CODING|ACT38115||1),downstream_gene_var…	150	97	COG4651	P	NO	.	.	.	.	.	.	.	.	.	.	.	.	.	.	.	.	.	.	.
480581	T	C	SNP	synonymous_variant	LOW	gcT/gcC	p.Ala99Ala/c.297T>C	ybaQ	EFF=synonymous_variant(LOW|SILENT|gcT/gcC|p.Ala99Ala/c.297T>C|113|ybaQ|protein_coding|CODING|ACT38124|1|1),upstream_gene_variant(MODIFIER||3818||406|fsr|protein_coding|CODING|ACT38120||1),upstream_gene_variant(MODIFIER||3228||310|ybaS|protein_coding|CODING|ACT38126||1),upstream_gene_variant(MODIFIER||1432||159|ybaK|protein_coding|CODING|ACT38122||1),upstream_gene_variant(MODIFIER||4163||430|ybaT|…	223	210	COG3093	R	NO	480285	480626	+	T297C	-98.18	-99.34	0.000113156	6.35338e-05	114.98	79.35	0.4593	0.0002	98-340	0.9888	0.9992	98-298	0.9796	0.881781	0.818691
500831	T	C	SNP	missense_variant	MODERATE	Tca/Cca	p.Ser9Pro/c.25T>C	ybbD	EFF=missense_variant(MODERATE|MISSENSE|Tca/Cca|p.Ser9Pro/c.25T>C|86|ybbD|protein_coding|CODING|ACT38141|1|1),upstream_gene_variant(MODIFIER||3786||160|allA|protein_coding|CODING|ACT38145||1),upstream_gene_variant(MODIFIER||4346||271|allR|protein_coding|CODING|ACT38146||1),downstream_gene_variant(MODIFIER||980||123|ylbG|protein_coding|CODING|ACT38142||1),downstream_gene_variant(MODIFIER||1467||364…	NA	NA	NA	NA	NO	500807	501067	+	T25C	-54.51	-55.47	0.000229975	0.00028961	95.26	75.79	0.2889	0.2233	17-83	0.0381	0.2673	17-118	0.1061	0.76225	0.715084
505744	C	T	SNP	missense_variant	MODERATE	Ccc/Tcc	p.Pro190Ser/c.568C>T	allR	EFF=missense_variant(MODERATE|MISSENSE|Ccc/Tcc|p.Pro190Ser/c.568C>T|271|allR|protein_coding|CODING|ACT38146|1|1),upstream_gene_variant(MODIFIER||338||593|gcl|protein_coding|CODING|ACT38147||1),upstream_gene_variant(MODIFIER||3562||123|ylbG|protein_coding|CODING|ACT38142||1),upstream_gene_variant(MODIFIER||2132||258|hyi|protein_coding|CODING|ACT38148||1),upstream_gene_variant(MODIFIER||2352||364|y…	146	130	COG1414	K	NO	505177	505992	+	C568T	-345.09	-350.09	1.41717e-08	8.33409e-08	244.63	122.54	0.5087	0.1474	538-606	0.178	0.2482	581-658	0.1533	0.96922	0.946753
516281	A	G	SNP	missense_variant	MODERATE	cTt/cCt	p.Leu393Pro/c.1178T>C	allC	EFF=missense_variant(MODERATE|MISSENSE|cTt/cCt|p.Leu393Pro/c.1178T>C|411|allC|protein_coding|CODING|ACT38156|1|1),upstream_gene_variant(MODIFIER||2565||555|fdrA|protein_coding|CODING|ACT38158||1),upstream_gene_variant(MODIFIER||4242||419|ylbE|protein_coding|CODING|ACT38159||1),upstream_gene_variant(MODIFIER||69||261|ylbA|protein_coding|CODING|ACT38155||1),downstream_gene_variant(MODIFIER||1199||3…	6	32	COG0624	E	NO	516223	517458	-	T1178C	-499.78	-502.47	1.66531e-12	2.02202e-12	279	227.99	0.5212	0.0014	1142-1191	0.9731	0.9982	1135-1188	0.9768	0.996728	0.973999
518801	C	T	SNP	upstream_gene_variant	MODIFIER	.	.	.	EFF=upstream_gene_variant(MODIFIER||45||555|fdrA|protein_coding|CODING|ACT38158||1),upstream_gene_variant(MODIFIER||1722||419|ylbE|protein_coding|CODING|ACT38159||1),upstream_gene_variant(MODIFIER||2589||261|ylbA|protein_coding|CODING|ACT38155||1),upstream_gene_variant(MODIFIER||3088||239|ylbF|protein_coding|CODING|ACT38160||1),upstream_gene_variant(MODIFIER||1343||411|allC|protein_coding|CODING|…	.	.	NA	NA	.	.	.	.	.	.	.	.	.	.	.	.	.	.	.	.	.	.	.	.
519553	C	T	SNP	synonymous_variant	LOW	ggC/ggT	p.Gly236Gly/c.708C>T	fdrA	EFF=synonymous_variant(LOW|SILENT|ggC/ggT|p.Gly236Gly/c.708C>T|555|fdrA|protein_coding|CODING|ACT38158|1|1),upstream_gene_variant(MODIFIER||970||419|ylbE|protein_coding|CODING|ACT38159||1),upstream_gene_variant(MODIFIER||3341||261|ylbA|protein_coding|CODING|ACT38155||1),upstream_gene_variant(MODIFIER||2336||239|ylbF|protein_coding|CODING|ACT38160||1),upstream_gene_variant(MODIFIER||2095||411|allC…	0	12	COG0074	C	NO	518846	520513	+	C708T	-766.49	-764	2.09826e-16	8.365e-17	432.29	457.1	0.5885	0.2221	594-807	0.0878	-0.1032	666-774	0.0564	0.985722	0.978241
521024	C	T	SNP	missense_variant	MODERATE	Cgc/Tgc	p.Arg168Cys/c.502C>T	ylbE	EFF=missense_variant(MODERATE|MISSENSE|Cgc/Tgc|p.Arg168Cys/c.502C>T|419|ylbE|protein_coding|CODING|ACT38159|1|1),upstream_gene_variant(MODIFIER||4812||261|ylbA|protein_coding|CODING|ACT38155||1),upstream_gene_variant(MODIFIER||865||239|ylbF|protein_coding|CODING|ACT38160||1),upstream_gene_variant(MODIFIER||3566||411|allC|protein_coding|CODING|ACT38156||1),upstream_gene_variant(MODIFIER||1581||297…	1	19	NA	NA	NO	520523	521782	+	C502T	-583.07	-583.75	3.38525e-14	7.65396e-14	419.92	411.04	0.5611	0.0589	429-538	0.4494	0.6081	408-502	0.3527	0.980952	0.982736
521830	C	T	SNP	upstream_gene_variant	MODIFIER	.	.	.	EFF=upstream_gene_variant(MODIFIER||59||239|ylbF|protein_coding|CODING|ACT38160||1),upstream_gene_variant(MODIFIER||4372||411|allC|protein_coding|CODING|ACT38156||1),upstream_gene_variant(MODIFIER||775||297|arcC|protein_coding|CODING|ACT38161||1),upstream_gene_variant(MODIFIER||3301||349|allD|protein_coding|CODING|ACT38157||1),upstream_gene_variant(MODIFIER||4889||461|cysS|protein_coding|CODING|A…	.	.	NA	NA	.	.	.	.	.	.	.	.	.	.	.	.	.	.	.	.	.	.	.	.
524602	G	A	SNP	missense_variant	MODERATE	gCt/gTt	p.Ala34Val/c.101C>T	purK	EFF=missense_variant(MODERATE|MISSENSE|gCt/gTt|p.Ala34Val/c.101C>T|355|purK|protein_coding|CODING|ACT38162|1|1),upstream_gene_variant(MODIFIER||2117||461|cysS|protein_coding|CODING|ACT38166||1),downstream_gene_variant(MODIFIER||97||169|purE|protein_coding|CODING|ACT38163||1),downstream_gene_variant(MODIFIER||724||240|ybbF|protein_coding|CODING|ACT38164||1|WARNING_TRANSCRIPT_NO_START_CODON),downst…	36	60	COG0026	F	NO	523635	524702	-	C101T	-497.57	-496.87	7.06236e-12	5.14862e-11	158.58	246.35	0.588	0.1046	66-120	0.2792	0.2219	65-115	0.1378	0.906651	0.921188
530731	T	C	SNP	missense_variant	MODERATE	Ttc/Ctc	p.Phe138Leu/c.412T>C	sfmA	EFF=missense_variant(MODERATE|MISSENSE|Ttc/Ctc|p.Phe138Leu/c.412T>C|180|sfmA|protein_coding|CODING|ACT38170|1|1),upstream_gene_variant(MODIFIER||4683||240|ybbF|protein_coding|CODING|ACT38164||1|WARNING_TRANSCRIPT_NO_START_CODON),upstream_gene_variant(MODIFIER||351||230|sfmC|protein_coding|CODING|ACT38171||1),upstream_gene_variant(MODIFIER||4186||164|ppiB|protein_coding|CODING|ACT38165||1),upstrea…	1	9	COG3539	NU	NO	530320	530862	+	T412C	-187.65	-188.38	1.79097e-06	2.10852e-06	78.25	62.38	0.4307	0.0029	385-477	0.9272	0.9753	351-411	0.8535	0.993006	0.967241
531146	A	G	SNP	missense_variant	MODERATE	cAt/cGt	p.His22Arg/c.65A>G	sfmC	EFF=missense_variant(MODERATE|MISSENSE|cAt/cGt|p.His22Arg/c.65A>G|230|sfmC|protein_coding|CODING|ACT38171|1|1),upstream_gene_variant(MODIFIER||4601||164|ppiB|protein_coding|CODING|ACT38165||1),upstream_gene_variant(MODIFIER||659||869|sfmD|protein_coding|CODING|ACT38172||1),upstream_gene_variant(MODIFIER||2485||173|ybcI|protein_coding|CODING|ACT38167||1),upstream_gene_variant(MODIFIER||2165||70|yb…	0	22	COG3121	NU	NO	531082	531774	+	A65G	-229.03	-229.03	1.06327e-07	6.58066e-08	145.85	151.54	0.4113	0	46-95	1	1	26-259	0.9993	0.99668	0.993555
534917	A	G	SNP	synonymous_variant	LOW	agA/agG	p.Arg154Arg/c.462A>G	sfmH	EFF=synonymous_variant(LOW|SILENT|agA/agG|p.Arg154Arg/c.462A>G|325|sfmH|protein_coding|CODING|ACT38173|1|1),upstream_gene_variant(MODIFIER||527||171|sfmF|protein_coding|CODING|ACT38174||1),upstream_gene_variant(MODIFIER||1920|||argU|tRNA|NON_CODING|ECB_t00007||1),downstream_gene_variant(MODIFIER||4055||180|sfmA|protein_coding|CODING|ACT38170||1),downstream_gene_variant(MODIFIER||1045||210|fimZ|pr…	1	38	COG3539	NU	NO	534456	535433	+	A462G	-362.18	-362.18	9.285e-11	3.65461e-11	155.58	148.08	0.4464	0.003	443-497	0.9214	0.9952	443-583	0.9433	0.999978	0.999548
535504	G	A	SNP	missense_variant	MODERATE	Gct/Act	p.Ala21Thr/c.61G>A	sfmF	EFF=missense_variant(MODERATE|MISSENSE|Gct/Act|p.Ala21Thr/c.61G>A|171|sfmF|protein_coding|CODING|ACT38174|1|1),upstream_gene_variant(MODIFIER||1333|||argU|tRNA|NON_CODING|ECB_t00007||1),upstream_gene_variant(MODIFIER||4448||61|renD|protein_coding|CODING|ACT38181||1),upstream_gene_variant(MODIFIER||4701||110|emrE|protein_coding|CODING|ACT38182||1),downstream_gene_variant(MODIFIER||4642||180|sfmA|p…	0	22	COG3539	NU	NO	535444	535959	+	G61A	-187.53	-187.61	3.36481e-07	3.52301e-07	124.28	112.33	0.4866	0.0006	18-67	0.9822	0.9992	11-142	0.9836	0.999993	0.999693
543928	A	G	SNP	synonymous_variant	LOW	ttA/ttG	p.Leu195Leu/c.585A>G	ybcM	EFF=synonymous_variant(LOW|SILENT|ttA/ttG|p.Leu195Leu/c.585A>G|265|ybcM|protein_coding|CODING|ACT38185|1|1),upstream_gene_variant(MODIFIER||4680||104|ECB_00489|protein_coding|CODING|ACT38179||1),upstream_gene_variant(MODIFIER||428||151|ybcN|protein_coding|CODING|ACT38186||1|WARNING_TRANSCRIPT_NO_START_CODON),upstream_gene_variant(MODIFIER||4337||121|ECB_00490|protein_coding|CODING|ACT38180||1),up…	11	68	COG2207	K	NO	543344	544141	+	A585G	-230.18	-229.41	1.96853e-08	1.05666e-08	147.8	149.2	0.3815	0.0261	583-640	0.5961	0.9327	583-640	0.7288	0.990873	0.898725
550485	G	GG	INS	upstream_gene_variant	MODIFIER	.	.	.	EFF=upstream_gene_variant(MODIFIER||820||191|nohB|protein_coding|CODING|ACT38199||1),upstream_gene_variant(MODIFIER||1355||938|ECB_00512|protein_coding|CODING|ACT38200||1|WARNING_TRANSCRIPT_NO_START_CODON),upstream_gene_variant(MODIFIER||3036||167|insB-6|protein_coding|CODING|ACT38192||1),upstream_gene_variant(MODIFIER||2842||91|insA-6|protein_coding|CODING|ACT38193||1|WARNING_TRANSCRIPT_NO_START…	.	.	NA	NA	.	.	.	.	.	.	.	.	.	.	.	.	.	.	.	.	.	.	.	.
553275	C	T	SNP	stop_gained	HIGH	Cag/Tag	p.Gln479*/c.1435C>T	ECB_00512	EFF=stop_gained(HIGH|NONSENSE|Cag/Tag|p.Gln479*/c.1435C>T|938|ECB_00512|protein_coding|CODING|ACT38200|1|1|WARNING_TRANSCRIPT_NO_START_CODON),upstream_gene_variant(MODIFIER||1441||781|ECB_00513|protein_coding|CODING|ACT38201||1),upstream_gene_variant(MODIFIER||2913||97|ybcU|protein_coding|CODING|ACT38197||1),upstream_gene_variant(MODIFIER||2358||64|ECB_00510|protein_coding|CODING|ACT38198||1),ups…	NA	NA	NA	NA	NO	551841	554657	+	C1435T	-1318.88	-1316.77	3.30112e-27	3.49624e-28	719.22	804	0.606	0.014	1586-1635	0.8034	0.9456	1558-1634	0.7744	0.999989	0.999899
561180	T	C	SNP	upstream_gene_variant	MODIFIER	.	.	.	EFF=upstream_gene_variant(MODIFIER||2733||111|ECB_00517|protein_coding|CODING|ACT38205||1|WARNING_TRANSCRIPT_NO_START_CODON),upstream_gene_variant(MODIFIER||196||317|ompT|protein_coding|CODING|ACT38207||1),downstream_gene_variant(MODIFIER||318||253|envY|protein_coding|CODING|ACT38208||1),downstream_gene_variant(MODIFIER||4119||781|ECB_00513|protein_coding|CODING|ACT38201||1),downstream_gene_varia…	.	.	NA	NA	.	.	.	.	.	.	.	.	.	.	.	.	.	.	.	.	.	.	.	.
561729	G	A	SNP	synonymous_variant	LOW	agC/agT	p.Ser177Ser/c.531C>T	envY	EFF=synonymous_variant(LOW|SILENT|agC/agT|p.Ser177Ser/c.531C>T|253|envY|protein_coding|CODING|ACT38208|1|1),upstream_gene_variant(MODIFIER||3282||111|ECB_00517|protein_coding|CODING|ACT38205||1|WARNING_TRANSCRIPT_NO_START_CODON),upstream_gene_variant(MODIFIER||745||317|ompT|protein_coding|CODING|ACT38207||1),downstream_gene_variant(MODIFIER||4668||781|ECB_00513|protein_coding|CODING|ACT38201||1),…	0	20	COG2207	K	NO	561498	562259	-	C531T	-245.76	-245.78	2.52736e-09	2.34433e-09	134.97	165.74	0.4464	0.0349	476-536	0.5368	0.8335	461-534	0.5535	0.99174	0.985913
563070	T	C	SNP	missense_variant	MODERATE	aAg/aGg	p.Lys88Arg/c.263A>G	ybcH	EFF=missense_variant(MODERATE|MISSENSE|aAg/aGg|p.Lys88Arg/c.263A>G|296|ybcH|protein_coding|CODING|ACT38209|1|1),upstream_gene_variant(MODIFIER||4623||111|ECB_00517|protein_coding|CODING|ACT38205||1|WARNING_TRANSCRIPT_NO_START_CODON),upstream_gene_variant(MODIFIER||2086||317|ompT|protein_coding|CODING|ACT38207||1),upstream_gene_variant(MODIFIER||811||253|envY|protein_coding|CODING|ACT38208||1),dow…	9	17	NA	NA	NO	562442	563332	-	A263G	-355.98	-357.63	1.66337e-09	1.78693e-09	162.1	99.8	0.5611	0.1548	181-283	0.1657	0.3699	181-286	0.206	0.985258	0.952394
571727	C	T	SNP	synonymous_variant	LOW	ggG/ggA	p.Gly104Gly/c.312G>A	ECB_00529	EFF=synonymous_variant(LOW|SILENT|ggG/ggA|p.Gly104Gly/c.312G>A|185|ECB_00529|protein_coding|CODING|ACT38216|1|1),upstream_gene_variant(MODIFIER||2905||56|ECB_00524|protein_coding|CODING|ACT38211||1),upstream_gene_variant(MODIFIER||1791||378|yhhI-2|protein_coding|CODING|ACT38212||1),upstream_gene_variant(MODIFIER||951||53|ECB_00526|protein_coding|CODING|ACT38213||1),upstream_gene_variant(MODIFIER|…	NA	NA	NA	NA	NO	571481	572038	-	G312A	-260	-258.38	1.46386e-06	1.50197e-06	118.87	103.28	0.586	0.0183	298-347	0.7407	0.8618	298-347	0.6235	0.966904	0.906773
573052	C	T	SNP	missense_variant	MODERATE	tGt/tAt	p.Cys146Tyr/c.437G>A	ECB_00530	EFF=missense_variant(MODERATE|MISSENSE|tGt/tAt|p.Cys146Tyr/c.437G>A|532|ECB_00530|protein_coding|CODING|ACT38217|1|1),upstream_gene_variant(MODIFIER||4230||56|ECB_00524|protein_coding|CODING|ACT38211||1),upstream_gene_variant(MODIFIER||3116||378|yhhI-2|protein_coding|CODING|ACT38212||1),upstream_gene_variant(MODIFIER||2276||53|ECB_00526|protein_coding|CODING|ACT38213||1),upstream_gene_variant(MOD…	NA	NA	NA	NA	NO	571890	573488	-	G437A	-702.11	-699.88	1.30122e-18	4.89669e-19	525.12	536.44	0.5561	0.0021	238-487	0.9529	0.9948	247-485	0.9455	0.978715	0.941022
593933	A	G	SNP	synonymous_variant	LOW	cgT/cgC	p.Arg423Arg/c.1269T>C	fepA	EFF=synonymous_variant(LOW|SILENT|cgT/cgC|p.Arg423Arg/c.1269T>C|746|fepA|protein_coding|CODING|ACT38236|1|1),upstream_gene_variant(MODIFIER||3860||167|insB-7|protein_coding|CODING|ACT38231||1),upstream_gene_variant(MODIFIER||3666||91|insA-7|protein_coding|CODING|ACT38232||1|WARNING_TRANSCRIPT_NO_START_CODON),upstream_gene_variant(MODIFIER||1590||374|fes|protein_coding|CODING|ACT38237||1),upstream…	6	17	COG4771	P	NO	592961	595201	-	T1269C	-927.84	-929.84	5.18973e-24	4.78311e-24	300.68	297.69	0.5162	0.0986	1346-1401	0.2917	-0.1915	1346-1401	0.0416	0.979438	0.945711
597626	G	A	SNP	synonymous_variant	LOW	gcG/gcA	p.Ala254Ala/c.762G>A	entF	EFF=synonymous_variant(LOW|SILENT|gcG/gcA|p.Ala254Ala/c.762G>A|1293|entF|protein_coding|CODING|ACT38239|1|1),upstream_gene_variant(MODIFIER||4831||209|entD|protein_coding|CODING|ACT38235||1),upstream_gene_variant(MODIFIER||2425||746|fepA|protein_coding|CODING|ACT38236||1),upstream_gene_variant(MODIFIER||3336||377|fepE|protein_coding|CODING|ACT38240||1),downstream_gene_variant(MODIFIER||979||374|f…	15	24	COG1020	Q	NO	596865	600746	+	G762A	-1822.44	-1820.77	4.10194e-37	1.16749e-37	1041.59	963.89	0.5985	0.0999	669-771	0.2877	0.5404	691-776	0.3037	0.995391	0.996608
610064	G	GG	INS	frameshift_variant	HIGH	cgc/Gcgc	p.Arg430_Glu431fs/c.1288_1289insG	entE	EFF=frameshift_variant(HIGH||cgc/Gcgc|p.Arg430_Glu431fs/c.1288_1289insG|536|entE|protein_coding|CODING|ACT38247|1|1),upstream_gene_variant(MODIFIER||337||285|entB|protein_coding|CODING|ACT38248||1),upstream_gene_variant(MODIFIER||1194||248|entA|protein_coding|CODING|ACT38249||1),upstream_gene_variant(MODIFIER||1943||137|ybdB|protein_coding|CODING|ACT38250||1),upstream_gene_variant(MODIFIER||2847|…	31	32	COG1021	Q	NO	.	.	.	.	.	.	.	.	.	.	.	.	.	.	.	.	.	.	.
628354	T	C	SNP	missense_variant	MODERATE	aAa/aGa	p.Lys93Arg/c.278A>G	citT	EFF=missense_variant(MODERATE|MISSENSE|aAa/aGa|p.Lys93Arg/c.278A>G|487|citT|protein_coding|CODING|ACT38265|1|1),upstream_gene_variant(MODIFIER||4436||142|ybdQ|protein_coding|CODING|ACT38261||1),upstream_gene_variant(MODIFIER||2336||136|rnk|protein_coding|CODING|ACT38263||1),upstream_gene_variant(MODIFIER||1300||268|rna|protein_coding|CODING|ACT38264||1),downstream_gene_variant(MODIFIER||4985||521…	0	17	COG0471	P	NO	627168	628631	-	A278G	-594.79	-594.37	4.3162e-17	2.03324e-17	382.1	382.54	0.4913	0	304-404	1	1	81-463	0.9992	1	0.999996
630826	C	T	SNP	missense_variant	MODERATE	gGc/gAc	p.Gly266Asp/c.797G>A	citF	EFF=missense_variant(MODERATE|MISSENSE|gGc/gAc|p.Gly266Asp/c.797G>A|510|citF|protein_coding|CODING|ACT38268|1|1),upstream_gene_variant(MODIFIER||4808||136|rnk|protein_coding|CODING|ACT38263||1),upstream_gene_variant(MODIFIER||3772||268|rna|protein_coding|CODING|ACT38264||1),upstream_gene_variant(MODIFIER||2195||487|citT|protein_coding|CODING|ACT38265||1),upstream_gene_variant(MODIFIER||1266||292|…	0	11	COG3051	C	NO	630090	631622	-	G797A	-669.07	-665.89	1.54981e-16	1.63847e-16	279.51	345.2	0.5461	0.077	796-886	0.3675	0.6578	796-887	0.3933	0.853638	0.880605
635256	C	T	SNP	missense_variant	MODERATE	gCg/gTg	p.Ala145Val/c.434C>T	citA	EFF=missense_variant(MODERATE|MISSENSE|gCg/gTg|p.Ala145Val/c.434C>T|552|citA|protein_coding|CODING|ACT38274|1|1),upstream_gene_variant(MODIFIER||1194||226|citB|protein_coding|CODING|ACT38275||1),upstream_gene_variant(MODIFIER||3634||510|citF|protein_coding|CODING|ACT38268||1),upstream_gene_variant(MODIFIER||2715||302|citE|protein_coding|CODING|ACT38269||1),upstream_gene_variant(MODIFIER||2422||98…	17	27	COG3290	T	NO	634823	636481	+	C434T	-657.98	-657.82	9.02885e-20	6.11325e-19	379.64	483.22	0.5087	0.0033	362-444	0.9319	0.983	489-546	0.8889	0.97206	0.872112
640130	TT	T	DEL	upstream_gene_variant	MODIFIER	.	.	.	EFF=upstream_gene_variant(MODIFIER||482||262|ybeM|protein_coding|CODING|ACT38280||1),upstream_gene_variant(MODIFIER||1399||67|tatE|protein_coding|CODING|ACT38281||1),upstream_gene_variant(MODIFIER||1575||461|dcuC|protein_coding|CODING|ACT38276||1),downstream_gene_variant(MODIFIER||6||127|ccrB|protein_coding|CODING|ACT38279||1|WARNING_TRANSCRIPT_NO_START_CODON),downstream_gene_variant(MODIFIER||36…	.	.	NA	NA	.	.	.	.	.	.	.	.	.	.	.	.	.	.	.	.	.	.	.	.
656600	A	G	SNP	synonymous_variant	LOW	tgT/tgC	p.Cys256Cys/c.768T>C	leuS	EFF=synonymous_variant(LOW|SILENT|tgT/tgC|p.Cys256Cys/c.768T>C|860|leuS|protein_coding|CODING|ACT38296|1|1),upstream_gene_variant(MODIFIER||4980||105|ybeB|protein_coding|CODING|ACT38291||1),upstream_gene_variant(MODIFIER||4109||203|phpB|protein_coding|CODING|ACT38292||1),upstream_gene_variant(MODIFIER||1002||160|ybeL|protein_coding|CODING|ACT38297||1),upstream_gene_variant(MODIFIER||3444||213|nad…	391	166	COG0495	J	YES	654785	657367	-	T768C	-1074.07	-1073.68	1.85595e-27	6.36157e-27	515.75	636.27	0.5162	0.0774	740-789	0.366	0.6258	738-787	0.3667	0.961532	0.935111
661204	C	T	SNP	missense_variant	MODERATE	Cgt/Tgt	p.Arg299Cys/c.895C>T	ybeV	EFF=missense_variant(MODERATE|MISSENSE|Cgt/Tgt|p.Arg299Cys/c.895C>T|379|ybeV|protein_coding|CODING|ACT38299|1|1),upstream_gene_variant(MODIFIER||3837||860|leuS|protein_coding|CODING|ACT38296||1),upstream_gene_variant(MODIFIER||3531||173|insJ-2|protein_coding|CODING|ACT38302||1),upstream_gene_variant(MODIFIER||4049||283|insK-2|protein_coding|CODING|ACT38303||1|WARNING_TRANSCRIPT_NO_START_CODON),do…	5	29	NA	NA	NO	660310	661449	+	C895T	-432.56	-432.65	1.0311e-12	9.70842e-13	153.25	160.89	0.4638	0.0551	843-920	0.4034	0.7187	1012-1061	0.4157	0.960359	0.904627
666342	C	T	SNP	upstream_gene_variant	MODIFIER	.	.	.	EFF=upstream_gene_variant(MODIFIER||3163||556|hscC|protein_coding|CODING|ACT38300||1),upstream_gene_variant(MODIFIER||2144||311|rihA|protein_coding|CODING|ACT38301||1),upstream_gene_variant(MODIFIER||3092||625|ECB_00624|protein_coding|CODING|ACT38307||1),downstream_gene_variant(MODIFIER||4893||379|ybeV|protein_coding|CODING|ACT38299||1),downstream_gene_variant(MODIFIER||145||224|gltK|protein_codi…	.	.	NA	NA	.	.	.	.	.	.	.	.	.	.	.	.	.	.	.	.	.	.	.	.
667369	T	C	SNP	missense_variant	MODERATE	aAc/aGc	p.Asn178Ser/c.533A>G	gltJ	EFF=missense_variant(MODERATE|MISSENSE|aAc/aGc|p.Asn178Ser/c.533A>G|246|gltJ|protein_coding|CODING|ACT38305|1|1),upstream_gene_variant(MODIFIER||4190||556|hscC|protein_coding|CODING|ACT38300||1),upstream_gene_variant(MODIFIER||3171||311|rihA|protein_coding|CODING|ACT38301||1),upstream_gene_variant(MODIFIER||2065||625|ECB_00624|protein_coding|CODING|ACT38307||1),upstream_gene_variant(MODIFIER||208…	13	47	COG0765	E	NO	667161	667901	-	A533G	-317.13	-319.73	7.69259e-08	6.52161e-08	151.28	157.58	0.5761	0.1234	490-539	0.2261	0.1012	490-539	0.1042	0.949409	0.79507
674636	T	C	SNP	missense_variant	MODERATE	Act/Gct	p.Thr293Ala/c.877A>G	ybeZ	EFF=missense_variant(MODERATE|MISSENSE|Act/Gct|p.Thr293Ala/c.877A>G|359|ybeZ|protein_coding|CODING|ACT38311|1|1),upstream_gene_variant(MODIFIER||2560||391|ubiF|protein_coding|CODING|ACT38313||1),upstream_gene_variant(MODIFIER||1660||512|lnt|protein_coding|CODING|ACT38308||1),upstream_gene_variant(MODIFIER||757||292|ybeX|protein_coding|CODING|ACT38309||1),upstream_gene_variant(MODIFIER||200||155|y…	241	192	COG1702	T	NO	674433	675512	-	A877G	-435.7	-438.87	1.89878e-11	6.23987e-11	267.48	201.15	0.5162	0.0745	865-914	0.3778	0.8199	856-905	0.5647	0.974435	0.958695
680722	T	C	SNP	missense_variant	MODERATE	cAg/cGg	p.Gln184Arg/c.551A>G	asnB	EFF=missense_variant(MODERATE|MISSENSE|cAg/cGg|p.Gln184Arg/c.551A>G|554|asnB|protein_coding|CODING|ACT38314|1|1),upstream_gene_variant(MODIFIER||3672||474|yleA|protein_coding|CODING|ACT38312||1),upstream_gene_variant(MODIFIER||2123|||glnX|tRNA|NON_CODING|ECB_t00008||1),upstream_gene_variant(MODIFIER||2011|||glnV|tRNA|NON_CODING|ECB_t00009||1),upstream_gene_variant(MODIFIER||1887|||metU|tRNA|NON_C…	40	97	COG0367	E	NO	679608	681272	-	A551G	-675.35	-674.93	3.76295e-18	2.47065e-18	357.99	363.15	0.5012	0.0214	543-594	0.7106	0.8161	543-607	0.5596	0.993861	0.991357
689295	C	T	SNP	missense_variant	MODERATE	Ccg/Tcg	p.Pro370Ser/c.1108C>T	glnS	EFF=missense_variant(MODERATE|MISSENSE|Ccg/Tcg|p.Pro370Ser/c.1108C>T|554|glnS|protein_coding|CODING|ACT38320|1|1),upstream_gene_variant(MODIFIER||4449||382|nagA|protein_coding|CODING|ACT38317||1),upstream_gene_variant(MODIFIER||1134||468|ybfM|protein_coding|CODING|ACT38321||1),upstream_gene_variant(MODIFIER||3589||266|nagB|protein_coding|CODING|ACT38318||1),upstream_gene_variant(MODIFIER||2590||1…	159	86	COG0008	J	YES	688188	689852	+	C1108T	-686.45	-684.19	5.50185e-17	7.6977e-17	350.04	368.59	0.5162	0.0838	1086-1163	0.3414	0.5225	954-1012	0.2919	0.979099	0.975709
692244	C	T	SNP	upstream_gene_variant	MODIFIER	.	.	.	EFF=upstream_gene_variant(MODIFIER||2838||181|seqA|protein_coding|CODING|ACT38327||1),upstream_gene_variant(MODIFIER||3409||546|pgm|protein_coding|CODING|ACT38328||1),downstream_gene_variant(MODIFIER||51||148|fur|protein_coding|CODING|ACT38323||1),downstream_gene_variant(MODIFIER||4259||648|nagE|protein_coding|CODING|ACT38319||1),downstream_gene_variant(MODIFIER||786||176|fldA|protein_coding|CODI…	.	.	NA	NA	.	.	.	.	.	.	.	.	.	.	.	.	.	.	.	.	.	.	.	.
694395	T	C	SNP	missense_variant	MODERATE	gAc/gGc	p.Asp168Gly/c.503A>G	ybfF	EFF=missense_variant(MODERATE|MISSENSE|gAc/gGc|p.Asp168Gly/c.503A>G|254|ybfF|protein_coding|CODING|ACT38326|1|1),upstream_gene_variant(MODIFIER||687||181|seqA|protein_coding|CODING|ACT38327||1),upstream_gene_variant(MODIFIER||1258||546|pgm|protein_coding|CODING|ACT38328||1),upstream_gene_variant(MODIFIER||3112||164|ybfP|protein_coding|CODING|ACT38329||1),upstream_gene_variant(MODIFIER||1654||148|…	51	64	COG0596	R	NO	694133	694897	-	A503G	-278.61	-284.71	1.36387e-10	2.71388e-10	122.93	159.76	0.5237	0.1694	357-679	0.1438	0.348	473-666	0.1956	0.834019	0.665661
696479	C	T	SNP	missense_variant	MODERATE	gCg/gTg	p.Ala276Val/c.827C>T	pgm	EFF=missense_variant(MODERATE|MISSENSE|gCg/gTg|p.Ala276Val/c.827C>T|546|pgm|protein_coding|CODING|ACT38328|1|1),upstream_gene_variant(MODIFIER||1028||164|ybfP|protein_coding|CODING|ACT38329||1),upstream_gene_variant(MODIFIER||3738||148|fur|protein_coding|CODING|ACT38323||1),upstream_gene_variant(MODIFIER||2919||176|fldA|protein_coding|CODING|ACT38324||1),upstream_gene_variant(MODIFIER||2486||97|y…	271	118	COG0033	G	NO	695653	697293	+	C827T	-733.52	-731.08	6.96792e-15	4.73314e-15	284.9	294.82	0.5561	0.0839	801-858	0.3411	0.6925	800-857	0.4244	0.969643	0.944529
699972	C	T	SNP	missense_variant	MODERATE	gGg/gAg	p.Gly130Glu/c.389G>A	potE	EFF=missense_variant(MODERATE|MISSENSE|gGg/gAg|p.Gly130Glu/c.389G>A|439|potE|protein_coding|CODING|ACT38331|1|1),upstream_gene_variant(MODIFIER||2706||85|ECB_00650|protein_coding|CODING|ACT38333||1),upstream_gene_variant(MODIFIER||1280||216|ybfGH|protein_coding|CODING|ACT38330||1),downstream_gene_variant(MODIFIER||385||732|speF|protein_coding|CODING|ACT38332||1),downstream_gene_variant(MODIFIER||…	2	20	COG0531	E	NO	699041	700360	-	G389A	-567.74	-568.18	7.66659e-14	7.70459e-14	209.8	209.01	0.5337	0.2264	378-439	0.0843	0.2006	388-437	0.1358	0.97801	0.932009
706212	C	T	SNP	missense_variant	MODERATE	Gcc/Acc	p.Ala101Thr/c.301G>A	kdpD	EFF=missense_variant(MODERATE|MISSENSE|Gcc/Acc|p.Ala101Thr/c.301G>A|895|kdpD|protein_coding|CODING|ACT38335|1|1),upstream_gene_variant(MODIFIER||3657||732|speF|protein_coding|CODING|ACT38332||1),upstream_gene_variant(MODIFIER||2384||225|kdpE|protein_coding|CODING|ACT38334||1|WARNING_TRANSCRIPT_NO_START_CODON),downstream_gene_variant(MODIFIER||290||190|kdpC|protein_coding|CODING|ACT38336||1),downs…	14	32	COG2205	T	NO	703825	706512	-	G301A	-1260.02	-1254.26	3.03979e-28	2.1758e-28	782.94	859.64	0.5885	0.0231	147-314	0.6944	0.942	150-303	0.7706	0.925899	0.842288
707849	G	A	SNP	missense_variant	MODERATE	gCc/gTc	p.Ala428Val/c.1283C>T	kdpB	EFF=missense_variant(MODERATE|MISSENSE|gCc/gTc|p.Ala428Val/c.1283C>T|682|kdpB|protein_coding|CODING|ACT38337|1|1),upstream_gene_variant(MODIFIER||4021||225|kdpE|protein_coding|CODING|ACT38334||1|WARNING_TRANSCRIPT_NO_START_CODON),upstream_gene_variant(MODIFIER||3380||68|ybfA|protein_coding|CODING|ACT38340||1),upstream_gene_variant(MODIFIER||1337||895|kdpD|protein_coding|CODING|ACT38335||1),upstre…	12	15	COG2216	P	NO	707083	709131	-	C1283T	-957.77	-958.33	1.11162e-21	3.46803e-22	386.04	370.38	0.5736	0.1476	1199-1312	0.1776	0.3357	1232-1302	0.1899	0.967568	0.947927
711975	G	A	SNP	synonymous_variant	LOW	ctG/ctA	p.Leu40Leu/c.120G>A	rhsC	EFF=synonymous_variant(LOW|SILENT|ctG/ctA|p.Leu40Leu/c.120G>A|554|rhsC|protein_coding|CODING|ACT38341|1|1|WARNING_TRANSCRIPT_NO_START_CODON),upstream_gene_variant(MODIFIER||4901||190|kdpC|protein_coding|CODING|ACT38336||1),upstream_gene_variant(MODIFIER||1545||108|ybfB|protein_coding|CODING|ACT38342||1),upstream_gene_variant(MODIFIER||1989||477|ybfO|protein_coding|CODING|ACT38343||1),upstream_gen…	1	16	COG3209	M	NO	711856	713520	+	G120A	-682.54	-676.9	2.65719e-17	5.26803e-18	462.54	467.87	0.6406	0.2825	113-166	0.0721	-0.1812	104-166	0.048	0.987568	0.947309
723030	A	G	SNP	synonymous_variant	LOW	taT/taC	p.Tyr104Tyr/c.312T>C	ybgH	EFF=synonymous_variant(LOW|SILENT|taT/taC|p.Tyr104Tyr/c.312T>C|493|ybgH|protein_coding|CODING|ACT38351|1|1),upstream_gene_variant(MODIFIER||582||247|ybgI|protein_coding|CODING|ACT38352||1),upstream_gene_variant(MODIFIER||1348||218|ybgJ|protein_coding|CODING|ACT38353||1|WARNING_TRANSCRIPT_NO_START_CODON),upstream_gene_variant(MODIFIER||1998||310|ybgK|protein_coding|CODING|ACT38354||1),upstream_gen…	6	34	COG3104	E	NO	721860	723341	-	T312C	-603.96	-604.17	7.53097e-18	5.47948e-18	364.65	415.63	0.5387	0.0034	249-314	0.9289	0.9749	249-312	0.86	0.99871	0.999457
724551	T	C	SNP	synonymous_variant	LOW	cgT/cgC	p.Arg58Arg/c.174T>C	ybgJ	EFF=synonymous_variant(LOW|SILENT|cgT/cgC|p.Arg58Arg/c.174T>C|218|ybgJ|protein_coding|CODING|ACT38353|1|1|WARNING_TRANSCRIPT_NO_START_CODON),upstream_gene_variant(MODIFIER||477||310|ybgK|protein_coding|CODING|ACT38354||1),upstream_gene_variant(MODIFIER||1399||244|ybgL|protein_coding|CODING|ACT38355||1),upstream_gene_variant(MODIFIER||2169||263|nei|protein_coding|CODING|ACT38356||1),upstream_gene_…	54	101	COG2049	E	NO	724378	725034	+	T174C	-311.47	-311.47	1.58502e-07	1.42215e-07	88.86	92.49	0.5695	0.0212	153-371	0.7284	0.7958	266-357	0.5444	0.990831	0.954519
725894	G	A	SNP	synonymous_variant	LOW	ctG/ctA	p.Leu289Leu/c.867G>A	ybgK	EFF=synonymous_variant(LOW|SILENT|ctG/ctA|p.Leu289Leu/c.867G>A|310|ybgK|protein_coding|CODING|ACT38354|1|1),upstream_gene_variant(MODIFIER||56||244|ybgL|protein_coding|CODING|ACT38355||1),upstream_gene_variant(MODIFIER||826||263|nei|protein_coding|CODING|ACT38356||1),upstream_gene_variant(MODIFIER||2553||493|ybgH|protein_coding|CODING|ACT38351||1),downstream_gene_variant(MODIFIER||4073||473|phrB|…	52	116	COG1984	E	NO	725028	725960	+	G867A	-418.12	-415.69	1.71964e-10	9.38308e-11	256.82	253.46	0.5094	0.0378	817-876	0.5855	0.7256	817-886	0.4518	0.857341	0.835925
726957	A	G	SNP	missense_variant	MODERATE	Acc/Gcc	p.Thr80Ala/c.238A>G	nei	EFF=missense_variant(MODERATE|MISSENSE|Acc/Gcc|p.Thr80Ala/c.238A>G|263|nei|protein_coding|CODING|ACT38356|1|1),upstream_gene_variant(MODIFIER||3616||493|ybgH|protein_coding|CODING|ACT38351||1),downstream_gene_variant(MODIFIER||551||348|abrB|protein_coding|CODING|ACT38357||1),downstream_gene_variant(MODIFIER||1749||353|ybgO|protein_coding|CODING|ACT38358||1),downstream_gene_variant(MODIFIER||2602|…	32	41	COG0266	L	NO	726720	727511	+	A238G	-332.82	-334.5	2.68913e-09	1.17397e-09	91.81	92.73	0.5012	0.0427	214-263	0.5427	0.8236	231-287	0.5695	0.984336	0.997115
730146	T	TT	INS	frameshift_variant	HIGH	gaa/gAaa	p.Glu117_Lys118fs/c.349_350insA	ybgP	EFF=frameshift_variant(HIGH||gaa/gAaa|p.Glu117_Lys118fs/c.349_350insA|243|ybgP|protein_coding|CODING|ACT38359|1|1),upstream_gene_variant(MODIFIER||1593||348|abrB|protein_coding|CODING|ACT38357||1),upstream_gene_variant(MODIFIER||380||353|ybgO|protein_coding|CODING|ACT38358||1),downstream_gene_variant(MODIFIER||363||816|ybgQ|protein_coding|CODING|ACT38360||1|WARNING_TRANSCRIPT_NO_START_CODON),down…	0	17	COG3121	NU	NO	.	.	.	.	.	.	.	.	.	.	.	.	.	.	.	.	.	.	.
732743	T	TT	INS	frameshift_variant	HIGH	caa/cAaa	p.Gln73_Lys74fs/c.217_218insA	ybgQ	EFF=frameshift_variant(HIGH||caa/cAaa|p.Gln73_Lys74fs/c.217_218insA|816|ybgQ|protein_coding|CODING|ACT38360|1|1|WARNING_TRANSCRIPT_NO_START_CODON),upstream_gene_variant(MODIFIER||4190||348|abrB|protein_coding|CODING|ACT38357||1),upstream_gene_variant(MODIFIER||2977||353|ybgO|protein_coding|CODING|ACT38358||1),upstream_gene_variant(MODIFIER||2249||243|ybgP|protein_coding|CODING|ACT38359||1),upstre…	0	23	COG3188	NU	NO	.	.	.	.	.	.	.	.	.	.	.	.	.	.	.	.	.	.	.
738676	A	G	SNP	missense_variant	MODERATE	aAc/aGc	p.Asn66Ser/c.197A>G	sdhB	EFF=missense_variant(MODERATE|MISSENSE|aAc/aGc|p.Asn66Ser/c.197A>G|238|sdhB|protein_coding|CODING|ACT38366|1|1),upstream_gene_variant(MODIFIER||821||933|sucA|protein_coding|CODING|ACT38367||1),upstream_gene_variant(MODIFIER||3417||427|gltA|protein_coding|CODING|ACT38362||1),upstream_gene_variant(MODIFIER||3637||405|sucB|protein_coding|CODING|ACT38368||1),downstream_gene_variant(MODIFIER||2319||12…	67	379	COG0479	C	NO	738480	739196	+	A197G	-288.98	-290.01	5.82619e-09	3.20284e-09	190.87	167.57	0.5164	0.0014	87-225	0.9668	0.9936	139-197	0.9393	0.988842	0.960593
741457	T	C	SNP	missense_variant	MODERATE	gTc/gCc	p.Val654Ala/c.1961T>C	sucA	EFF=missense_variant(MODERATE|MISSENSE|gTc/gCc|p.Val654Ala/c.1961T>C|933|sucA|protein_coding|CODING|ACT38367|1|1),upstream_gene_variant(MODIFIER||856||405|sucB|protein_coding|CODING|ACT38368||1),upstream_gene_variant(MODIFIER||2439||388|sucC|protein_coding|CODING|ACT38369||1),upstream_gene_variant(MODIFIER||3605||289|sucD|protein_coding|CODING|ACT38370||1),downstream_gene_variant(MODIFIER||4759||…	49	290	COG0567	C	NO	739497	742298	+	T1961C	-1192.03	-1194.91	8.25697e-28	2.51091e-27	530.19	537.66	0.5835	0.016	1941-1993	0.7648	0.9596	1944-2001	0.8145	0.998584	0.987504
755295	C	T	SNP	synonymous_variant	LOW	gaC/gaT	p.Asp35Asp/c.105C>T	ybgE	EFF=synonymous_variant(LOW|SILENT|gaC/gaT|p.Asp35Asp/c.105C>T|97|ybgE|protein_coding|CODING|ACT38377|1|1),upstream_gene_variant(MODIFIER||339||134|ybgC|protein_coding|CODING|ACT38378||1|WARNING_TRANSCRIPT_NO_START_CODON),upstream_gene_variant(MODIFIER||740||230|tolQ|protein_coding|CODING|ACT38379||1|WARNING_TRANSCRIPT_NO_START_CODON),upstream_gene_variant(MODIFIER||1436||142|tolR|protein_coding|C…	156	83	COG3790	S	NO	755191	755484	+	C105T	-119.24	-118.09	0.00442772	0.00342566	85	76.62	0.4966	0.06	66-115	0.4082	0.611	73-157	0.3418	0.928075	0.896447
756622	C	T	SNP	synonymous_variant	LOW	aaC/aaT	p.Asn196Asn/c.588C>T	tolQ	EFF=synonymous_variant(LOW|SILENT|aaC/aaT|p.Asn196Asn/c.588C>T|230|tolQ|protein_coding|CODING|ACT38379|1|1|WARNING_TRANSCRIPT_NO_START_CODON),upstream_gene_variant(MODIFIER||109||142|tolR|protein_coding|CODING|ACT38380||1),upstream_gene_variant(MODIFIER||602||421|tolA|protein_coding|CODING|ACT38381||1|WARNING_TRANSCRIPT_NO_START_CODON),upstream_gene_variant(MODIFIER||2000||430|tolB|protein_coding…	423	174	COG0811	U	NO	756035	756727	+	C588T	-257.57	-258.45	1.41345e-08	9.27412e-09	194.47	209.85	0.5327	0.1961	520-601	0.1145	0.1576	525-578	0.1114	0.919434	0.967433
762818	T	C	SNP	synonymous_variant	LOW	cgT/cgC	p.Arg35Arg/c.105T>C	nadA	EFF=synonymous_variant(LOW|SILENT|cgT/cgC|p.Arg35Arg/c.105T>C|347|nadA|protein_coding|CODING|ACT38385|1|1),upstream_gene_variant(MODIFIER||977||239|pnuC|protein_coding|CODING|ACT38386||1),upstream_gene_variant(MODIFIER||3444||350|aroG|protein_coding|CODING|ACT38389||1),downstream_gene_variant(MODIFIER||4329||421|tolA|protein_coding|CODING|ACT38381||1|WARNING_TRANSCRIPT_NO_START_CODON),downstream_…	13	244	COG0379	H	NO	762714	763757	+	T105C	-397.56	-399.55	5.06286e-12	8.50085e-11	283.5	188.63	0.4754	0.203	10-120	0.085	-0.3166	32-120	0.022	0.921177	0.768236
764309	T	C	SNP	missense_variant	MODERATE	gTg/gCg	p.Val172Ala/c.515T>C	pnuC	EFF=missense_variant(MODERATE|MISSENSE|gTg/gCg|p.Val172Ala/c.515T>C|239|pnuC|protein_coding|CODING|ACT38386|1|1),upstream_gene_variant(MODIFIER||1953||350|aroG|protein_coding|CODING|ACT38389||1),downstream_gene_variant(MODIFIER||202||313|ybgR|protein_coding|CODING|ACT38387||1),downstream_gene_variant(MODIFIER||4395||430|tolB|protein_coding|CODING|ACT38382||1),downstream_gene_variant(MODIFIER||383…	9	193	COG3201	H	NO	763795	764514	+	T515C	-286.97	-285	1.41505e-09	2.67173e-09	117.78	117.7	0.4938	0.0283	477-526	0.5929	0.8917	470-519	0.6469	0.985006	0.983226
786772	A	G	SNP	missense_variant	MODERATE	gTt/gCt	p.Val349Ala/c.1046T>C	ybhC	EFF=missense_variant(MODERATE|MISSENSE|gTt/gCt|p.Val349Ala/c.1046T>C|427|ybhC|protein_coding|CODING|ACT38407|1|1|WARNING_TRANSCRIPT_NO_START_CODON),upstream_gene_variant(MODIFIER||3472||114|ECB_00730|protein_coding|CODING|ACT38412||1),upstream_gene_variant(MODIFIER||3797||61|ECB_00731|protein_coding|CODING|ACT38413||1),upstream_gene_variant(MODIFIER||4683||183|ECB_00732|protein_coding|CODING|ACT3…	206	93	COG4677	G	NO	786534	787817	-	T1046C	-530.29	-526.81	9.68825e-16	6.70279e-16	342.13	353.36	0.5212	0.2016	1017-1087	0.106	-0.3248	1033-1082	0.0247	0.972753	0.96733
794721	CC	C	DEL	frameshift_variant	HIGH	cct/	p.Pro94fs/c.281delC	ECB_00735	EFF=frameshift_variant(HIGH||cct/|p.Pro94fs/c.281delC|152|ECB_00735|protein_coding|CODING|ACT38417|1|1|WARNING_TRANSCRIPT_NO_START_CODON),upstream_gene_variant(MODIFIER||4940||94|ECB_00727|protein_coding|CODING|ACT38409||1|WARNING_TRANSCRIPT_NO_START_CODON),upstream_gene_variant(MODIFIER||175||132|ECB_00736|protein_coding|CODING|ACT38418||1|WARNING_TRANSCRIPT_NO_START_CODON),upstream_gene_variant…	NA	NA	NA	NA	NO	.	.	.	.	.	.	.	.	.	.	.	.	.	.	.	.	.	.	.
796259	A	G	SNP	missense_variant	MODERATE	gTc/gCc	p.Val24Ala/c.71T>C	ECB_00737	EFF=missense_variant(MODERATE|MISSENSE|gTc/gCc|p.Val24Ala/c.71T>C|330|ECB_00737|protein_coding|CODING|ACT38419|1|1),upstream_gene_variant(MODIFIER||496||445|ECB_00738|protein_coding|CODING|ACT38420||1),downstream_gene_variant(MODIFIER||4253||183|ECB_00732|protein_coding|CODING|ACT38414||1),downstream_gene_variant(MODIFIER||1871||381|ECB_00739|protein_coding|CODING|ACT38421||1),downstream_gene_var…	NA	NA	NA	NA	NO	795337	796329	-	T71C	-251.76	-253.23	2.43217e-12	2.93191e-12	230.45	199.71	0.3284	0.005	17-95	0.8919	0.9846	19-94	0.8971	0.998095	0.991573
798333	AA	A	DEL	frameshift_variant	HIGH	gct/	p.Ala314fs/c.942delT	ECB_00739	EFF=frameshift_variant(HIGH||gct/|p.Ala314fs/c.942delT|381|ECB_00739|protein_coding|CODING|ACT38421|1|1),upstream_gene_variant(MODIFIER||2005||330|ECB_00737|protein_coding|CODING|ACT38419||1),upstream_gene_variant(MODIFIER||3636||346|bioB|protein_coding|CODING|ACT38424||1),upstream_gene_variant(MODIFIER||4673||384|bioF|protein_coding|CODING|ACT38425||1),downstream_gene_variant(MODIFIER||4703||540…	NA	NA	NA	NA	NO	.	.	.	.	.	.	.	.	.	.	.	.	.	.	.	.	.	.	.
804961	A	G	SNP	synonymous_variant	LOW	gcA/gcG	p.Ala22Ala/c.66A>G	bioD	EFF=synonymous_variant(LOW|SILENT|gcA/gcG|p.Ala22Ala/c.66A>G|225|bioD|protein_coding|CODING|ACT38427|1|1|WARNING_TRANSCRIPT_NO_START_CODON),upstream_gene_variant(MODIFIER||4426||158|ybhB|protein_coding|CODING|ACT38422||1),upstream_gene_variant(MODIFIER||1191||673|uvrB|protein_coding|CODING|ACT38428||1),upstream_gene_variant(MODIFIER||3078||429|bioA|protein_coding|CODING|ACT38423||1),upstream_gene…	5	89	NA	NA	NO	804896	805573	+	A66G	-277.29	-283.1	7.85026e-09	1.6226e-08	78.77	73.19	0.5489	0.0911	42-91	0.312	0.7837	42-91	0.5057	0.981261	0.929051
810906	A	G	SNP	missense_variant	MODERATE	Acg/Gcg	p.Thr76Ala/c.226A>G	moaB	EFF=missense_variant(MODERATE|MISSENSE|Acg/Gcg|p.Thr76Ala/c.226A>G|170|moaB|protein_coding|CODING|ACT38431|1|1),upstream_gene_variant(MODIFIER||290||161|moaC|protein_coding|CODING|ACT38432||1),upstream_gene_variant(MODIFIER||768||81|moaD|protein_coding|CODING|ACT38433||1),upstream_gene_variant(MODIFIER||1015||150|moaE|protein_coding|CODING|ACT38434||1),upstream_gene_variant(MODIFIER||1603||234|yb…	143	147	COG0521	H	NO	810681	811193	+	A226G	-199.98	-200.01	5.50561e-07	5.87251e-07	48.31	48.63	0.5362	0.0007	59-407	0.9797	0.9985	44-235	0.9739	0.998838	0.992013
814020	C	T	SNP	synonymous_variant	LOW	tgC/tgT	p.Cys201Cys/c.603C>T	ybhM	EFF=synonymous_variant(LOW|SILENT|tgC/tgT|p.Cys201Cys/c.603C>T|237|ybhM|protein_coding|CODING|ACT38436|1|1),upstream_gene_variant(MODIFIER||4747||302|ybhK|protein_coding|CODING|ACT38429||1),upstream_gene_variant(MODIFIER||3235||136|ybhQ|protein_coding|CODING|ACT38440||1),downstream_gene_variant(MODIFIER||147||318|ybhN|protein_coding|CODING|ACT38437||1),downstream_gene_variant(MODIFIER||1103||413|…	6	25	COG0670	R	NO	813418	814131	+	C603T	-245.28	-243.18	8.75374e-10	8.88204e-10	82.36	82.37	0.4327	0	581-630	1	1	574-642	0.9997	1	1
825171	G	A	SNP	synonymous_variant	LOW	gaC/gaT	p.Asp135Asp/c.405C>T	ybiA	EFF=synonymous_variant(LOW|SILENT|gaC/gaT|p.Asp135Asp/c.405C>T|160|ybiA|protein_coding|CODING|ACT38447|1|1),upstream_gene_variant(MODIFIER||524||716|dinG|protein_coding|CODING|ACT38448||1),upstream_gene_variant(MODIFIER||3565||578|ybhF|protein_coding|CODING|ACT38443||1),upstream_gene_variant(MODIFIER||2574||332|ybhG|protein_coding|CODING|ACT38444||1|WARNING_TRANSCRIPT_NO_START_CODON),upstream_gen…	9	53	COG3236	S	NO	825093	825575	-	C405T	-162.04	-159.94	1.81259e-06	1.50569e-06	92.68	108.14	0.5269	0.0052	339-423	0.8991	0.9866	354-406	0.8974	0.962909	0.870833
828245	C	T	SNP	synonymous_variant	LOW	Ctg/Ttg	p.Leu125Leu/c.373C>T	ybiB	EFF=synonymous_variant(LOW|SILENT|Ctg/Ttg|p.Leu125Leu/c.373C>T|320|ybiB|protein_coding|CODING|ACT38449|1|1),upstream_gene_variant(MODIFIER||4977||223|ybiH|protein_coding|CODING|ACT38445||1),upstream_gene_variant(MODIFIER||731||361|ybiC|protein_coding|CODING|ACT38450||1),upstream_gene_variant(MODIFIER||2670||160|ybiA|protein_coding|CODING|ACT38447||1),downstream_gene_variant(MODIFIER||3384||454|rh…	27	47	COG0547	E	NO	827873	828835	+	C373T	-437.34	-437.34	7.80701e-11	7.64072e-11	174.65	176.02	0.5686	0.0374	330-379	0.579	0.845	325-400	0.5988	0.993951	0.961473
830036	C	T	SNP	missense_variant	MODERATE	gCt/gTt	p.Ala354Val/c.1061C>T	ybiC	EFF=missense_variant(MODERATE|MISSENSE|gCt/gTt|p.Ala354Val/c.1061C>T|361|ybiC|protein_coding|CODING|ACT38450|1|1),upstream_gene_variant(MODIFIER||4461||160|ybiA|protein_coding|CODING|ACT38447||1),upstream_gene_variant(MODIFIER||4921||308|ybiN|protein_coding|CODING|ACT38456||1),downstream_gene_variant(MODIFIER||254||86|ybiJ|protein_coding|CODING|ACT38451||1),downstream_gene_variant(MODIFIER||779||…	32	262	COG2055	C	NO	828976	830061	+	C1061T	-488.17	-485.61	7.80133e-12	2.17647e-12	117.12	175.78	0.5752	0.1683	1001-1072	0.1186	0.5186	1001-1072	0.2304	0.982648	0.951235
834416	T	C	SNP	upstream_gene_variant	MODIFIER	.	.	.	EFF=upstream_gene_variant(MODIFIER||541||308|ybiN|protein_coding|CODING|ACT38456||1),upstream_gene_variant(MODIFIER||3866||86|ybiJ|protein_coding|CODING|ACT38451||1),upstream_gene_variant(MODIFIER||3335||88|ybiI|protein_coding|CODING|ACT38452||1),upstream_gene_variant(MODIFIER||2584||225|ybiX|protein_coding|CODING|ACT38453||1),upstream_gene_variant(MODIFIER||260||760|ybiL|protein_coding|CODING|AC…	.	.	NA	NA	.	.	.	.	.	.	.	.	.	.	.	.	.	.	.	.	.	.	.	.
834906	A	G	SNP	upstream_gene_variant	MODIFIER	.	.	.	EFF=upstream_gene_variant(MODIFIER||51||308|ybiN|protein_coding|CODING|ACT38456||1),upstream_gene_variant(MODIFIER||4356||86|ybiJ|protein_coding|CODING|ACT38451||1),upstream_gene_variant(MODIFIER||3825||88|ybiI|protein_coding|CODING|ACT38452||1),upstream_gene_variant(MODIFIER||3074||225|ybiX|protein_coding|CODING|ACT38453||1),upstream_gene_variant(MODIFIER||750||760|ybiL|protein_coding|CODING|ACT…	.	.	NA	NA	.	.	.	.	.	.	.	.	.	.	.	.	.	.	.	.	.	.	.	.
838514	A	G	SNP	missense_variant	MODERATE	gTg/gCg	p.Val192Ala/c.575T>C	glnQ	EFF=missense_variant(MODERATE|MISSENSE|gTg/gCg|p.Val192Ala/c.575T>C|240|glnQ|protein_coding|CODING|ACT38458|1|1|WARNING_TRANSCRIPT_NO_START_CODON),upstream_gene_variant(MODIFIER||4358||760|ybiL|protein_coding|CODING|ACT38454||1),upstream_gene_variant(MODIFIER||3833||86|ybiM|protein_coding|CODING|ACT38455||1),upstream_gene_variant(MODIFIER||4561||171|ompX|protein_coding|CODING|ACT38463||1),upstrea…	68	219	COG1126	E	NO	838366	839088	-	T575C	-300.38	-299.54	1.14095e-08	9.07611e-09	232.48	164.23	0.5415	0.0473	556-605	0.5288	0.8632	556-605	0.6306	0.97664	0.947679
839898	A	G	SNP	synonymous_variant	LOW	ggT/ggC	p.Gly244Gly/c.732T>C	glnH	EFF=synonymous_variant(LOW|SILENT|ggT/ggC|p.Gly244Gly/c.732T>C|248|glnH|protein_coding|CODING|ACT38460|1|1),upstream_gene_variant(MODIFIER||3177||171|ompX|protein_coding|CODING|ACT38463||1),upstream_gene_variant(MODIFIER||1793||741|ybiO|protein_coding|CODING|ACT38457||1),upstream_gene_variant(MODIFIER||810||240|glnQ|protein_coding|CODING|ACT38458||1|WARNING_TRANSCRIPT_NO_START_CODON),upstream_gen…	228	1520	COG0834	ET	NO	839883	840629	-	T732C	-266.94	-266.94	2.17553e-07	2.98404e-07	153.28	148.66	0.4907	0.0243	697-746	0.5686	0.9487	698-747	0.7151	0.997372	0.982389
844589	C	T	SNP	missense_variant	MODERATE	Gtt/Att	p.Val212Ile/c.634G>A	ybiP	EFF=missense_variant(MODERATE|MISSENSE|Gtt/Att|p.Val212Ile/c.634G>A|527|ybiP|protein_coding|CODING|ACT38464|1|1),upstream_gene_variant(MODIFIER||4845||219|glnP|protein_coding|CODING|ACT38459||1),upstream_gene_variant(MODIFIER||707||89|ECB_00783|protein_coding|CODING|ACT38465||1|WARNING_TRANSCRIPT_NO_START_CODON),upstream_gene_variant(MODIFIER||3960||248|glnH|protein_coding|CODING|ACT38460||1),ups…	42	43	COG2194	R	NO	843639	845222	-	G634A	-561.78	-562.38	1.40342e-18	9.7406e-19	383.01	388.69	0.5037	0.0331	586-636	0.6107	0.901	586-636	0.6879	0.975544	0.922864
848160	C	T	SNP	synonymous_variant	LOW	gcG/gcA	p.Ala70Ala/c.210G>A	ybiS	EFF=synonymous_variant(LOW|SILENT|gcG/gcA|p.Ala70Ala/c.210G>A|306|ybiS|protein_coding|CODING|ACT38468|1|1),upstream_gene_variant(MODIFIER||428||530|ybiT|protein_coding|CODING|ACT38469||1|WARNING_TRANSCRIPT_NO_START_CODON),upstream_gene_variant(MODIFIER||2938||527|ybiP|protein_coding|CODING|ACT38464||1),downstream_gene_variant(MODIFIER||4570||171|ompX|protein_coding|CODING|ACT38463||1),downstream_…	220	123	NA	NA	NO	847449	848369	-	G210A	-371.78	-371.78	1.41125e-10	1.57295e-10	143.92	143.09	0.5162	0.0008	174-223	0.978	0.9985	156-210	0.9744	0.999902	0.999109
851938	C	T	SNP	missense_variant	MODERATE	Gac/Aac	p.Asp215Asn/c.643G>A	ybiV	EFF=missense_variant(MODERATE|MISSENSE|Gac/Aac|p.Asp215Asn/c.643G>A|271|ybiV|protein_coding|CODING|ACT38471|1|1),upstream_gene_variant(MODIFIER||3569||306|ybiS|protein_coding|CODING|ACT38468||1),upstream_gene_variant(MODIFIER||4256||220|fsa|protein_coding|CODING|ACT38474||1),upstream_gene_variant(MODIFIER||325||421|ybiU|protein_coding|CODING|ACT38470||1),downstream_gene_variant(MODIFIER||4548||37…	71	38	COG0561	R	NO	851765	852580	-	G643A	-290.89	-287.89	1.18497e-09	1.11079e-09	126.44	128.83	0.4813	0.0232	600-649	0.6484	0.898	599-648	0.6632	0.983739	0.878698
853885	T	C	SNP	missense_variant	MODERATE	aAa/aGa	p.Lys425Arg/c.1274A>G	ybiW	EFF=missense_variant(MODERATE|MISSENSE|aAa/aGa|p.Lys425Arg/c.1274A>G|810|ybiW|protein_coding|CODING|ACT38472|1|1),upstream_gene_variant(MODIFIER||2309||220|fsa|protein_coding|CODING|ACT38474||1),upstream_gene_variant(MODIFIER||2272||421|ybiU|protein_coding|CODING|ACT38470||1),upstream_gene_variant(MODIFIER||1305||271|ybiV|protein_coding|CODING|ACT38471||1),downstream_gene_variant(MODIFIER||1279||…	0	19	COG1882	C	NO	852726	855158	-	A1274G	-1031.28	-1031.72	1.21006e-27	1.52319e-27	457.65	527.62	0.5611	0.0011	1231-1280	0.971	0.9974	1226-1284	0.9639	0.999829	0.997455
864834	C	T	SNP	synonymous_variant	LOW	ggC/ggT	p.Gly131Gly/c.393C>T	yliD	EFF=synonymous_variant(LOW|SILENT|ggC/ggT|p.Gly131Gly/c.393C>T|303|yliD|protein_coding|CODING|ACT38481|1|1),upstream_gene_variant(MODIFIER||949||698|yliE|protein_coding|CODING|ACT38482||1|WARNING_TRANSCRIPT_NO_START_CODON),upstream_gene_variant(MODIFIER||3053||442|yliF|protein_coding|CODING|ACT38483||1),downstream_gene_variant(MODIFIER||4749||321|ybiK|protein_coding|CODING|ACT38477||1),downstream…	6	55	COG1173	EP	NO	864442	865353	+	C393T	-393.6	-390.93	2.09618e-10	1.95587e-10	166.69	187.95	0.5337	0.0602	455-517	0.4431	0.8057	378-587	0.5464	0.947077	0.904008
866697	C	T	SNP	synonymous_variant	LOW	aaC/aaT	p.Asn305Asn/c.915C>T	yliE	EFF=synonymous_variant(LOW|SILENT|aaC/aaT|p.Asn305Asn/c.915C>T|698|yliE|protein_coding|CODING|ACT38482|1|1|WARNING_TRANSCRIPT_NO_START_CODON),upstream_gene_variant(MODIFIER||1190||442|yliF|protein_coding|CODING|ACT38483||1),upstream_gene_variant(MODIFIER||4103||127|yliH|protein_coding|CODING|ACT38485||1),upstream_gene_variant(MODIFIER||4597||371|yliI|protein_coding|CODING|ACT38486||1),downstream_…	39	24	COG2200	T	NO	865783	867879	+	C915T	-745.99	-745.43	6.46147e-23	7.39504e-23	292.36	298.45	0.4239	0.2091	887-936	0.0643	0.6737	887-936	0.3727	0.991802	0.988017
875785	T	C	SNP	synonymous_variant	LOW	gcA/gcG	p.Ala52Ala/c.156A>G	ybjG	EFF=synonymous_variant(LOW|SILENT|gcA/gcG|p.Ala52Ala/c.156A>G|198|ybjG|protein_coding|CODING|ACT38490|1|1),upstream_gene_variant(MODIFIER||440||410|cmr|protein_coding|CODING|ACT38491||1),upstream_gene_variant(MODIFIER||2753||208|yliJ|protein_coding|CODING|ACT38487||1),upstream_gene_variant(MODIFIER||4190||178|ybjK|protein_coding|CODING|ACT38495||1),upstream_gene_variant(MODIFIER||499||252|deoR|pr…	160	78	COG0671	I	NO	875344	875940	-	A156G	-239.06	-242.68	9.05475e-07	2.85718e-06	152.36	74.92	0.4916	0.1484	152-228	0.1598	0.3273	152-207	0.1923	0.960697	0.803573
877351	G	GGG	INS	frameshift_variant	HIGH	ggc/ggGGc	p.Gly376_Asn377fs/c.1128_1129insGG	cmr	EFF=frameshift_variant(HIGH||ggc/ggGGc|p.Gly376_Asn377fs/c.1128_1129insGG|410|cmr|protein_coding|CODING|ACT38491|1|1),upstream_gene_variant(MODIFIER||4320||208|yliJ|protein_coding|CODING|ACT38487||1),upstream_gene_variant(MODIFIER||2623||178|ybjK|protein_coding|CODING|ACT38495||1),upstream_gene_variant(MODIFIER||2066||252|deoR|protein_coding|CODING|ACT38489||1),upstream_gene_variant(MODIFIER||141…	100	49	COG0477	GEPR	NO	.	.	.	.	.	.	.	.	.	.	.	.	.	.	.	.	.	.	.
878419	A	G	SNP	missense_variant	MODERATE	Ttt/Ctt	p.Phe89Leu/c.265T>C	ybjI	EFF=missense_variant(MODERATE|MISSENSE|Ttt/Ctt|p.Phe89Leu/c.265T>C|271|ybjI|protein_coding|CODING|ACT38493|1|1),upstream_gene_variant(MODIFIER||1556||178|ybjK|protein_coding|CODING|ACT38495||1),upstream_gene_variant(MODIFIER||3133||252|deoR|protein_coding|CODING|ACT38489||1),upstream_gene_variant(MODIFIER||2479||198|ybjG|protein_coding|CODING|ACT38490||1),upstream_gene_variant(MODIFIER||637||94|y…	57	53	COG0561	R	NO	877868	878683	-	T265C	-276.74	-279.41	1.98061e-10	2.09553e-10	182.19	176.07	0.4364	0.0013	231-280	0.9607	0.9962	173-271	0.9502	0.999655	0.995003
879034	G	A	SNP	synonymous_variant	LOW	gcC/gcT	p.Ala286Ala/c.858C>T	ybjJ	EFF=synonymous_variant(LOW|SILENT|gcC/gcT|p.Ala286Ala/c.858C>T|402|ybjJ|protein_coding|CODING|ACT38494|1|1),upstream_gene_variant(MODIFIER||941||178|ybjK|protein_coding|CODING|ACT38495||1),upstream_gene_variant(MODIFIER||3748||252|deoR|protein_coding|CODING|ACT38489||1),upstream_gene_variant(MODIFIER||3094||198|ybjG|protein_coding|CODING|ACT38490||1),upstream_gene_variant(MODIFIER||1252||94|ybjH|…	45	55	COG0477	GEPR	NO	878683	879891	-	C858T	-548.41	-548.96	1.45308e-10	2.12563e-11	218.94	305.6	0.5786	0.3429	836-1049	0.0301	-0.5983	854-907	0.0056	0.853493	0.760121
880172	C	T	SNP	synonymous_variant	LOW	atC/atT	p.Ile66Ile/c.198C>T	ybjK	EFF=synonymous_variant(LOW|SILENT|atC/atT|p.Ile66Ile/c.198C>T|178|ybjK|protein_coding|CODING|ACT38495|1|1),upstream_gene_variant(MODIFIER||4886||252|deoR|protein_coding|CODING|ACT38489||1),upstream_gene_variant(MODIFIER||4232||198|ybjG|protein_coding|CODING|ACT38490||1),upstream_gene_variant(MODIFIER||2390||94|ybjH|protein_coding|CODING|ACT38492||1),upstream_gene_variant(MODIFIER||3065||73|ECB_00…	13	29	COG3226	S	NO	879975	880511	+	C198T	-196.82	-194.59	3.11759e-07	2.92417e-07	99.95	113.91	0.5	0.0026	169-277	0.9425	0.9922	159-285	0.9286	0.998174	0.98679
881060	A	G	SNP	upstream_gene_variant	MODIFIER	.	.	.	EFF=upstream_gene_variant(MODIFIER||3278||94|ybjH|protein_coding|CODING|ACT38492||1),upstream_gene_variant(MODIFIER||2177||73|ECB_00818|protein_coding|CODING|ACT38500||1),upstream_gene_variant(MODIFIER||2431||169|ECB_00819|protein_coding|CODING|ACT38501||1),upstream_gene_variant(MODIFIER||2377||271|ybjI|protein_coding|CODING|ACT38493||1),upstream_gene_variant(MODIFIER||2909||79|ECB_00820|protein_…	.	.	NA	NA	.	.	.	.	.	.	.	.	.	.	.	.	.	.	.	.	.	.	.	.
882949	C	T	SNP	missense_variant	MODERATE	Gcc/Acc	p.Ala53Thr/c.157G>A	ECB_00817	EFF=missense_variant(MODERATE|MISSENSE|Gcc/Acc|p.Ala53Thr/c.157G>A|187|ECB_00817|protein_coding|CODING|ACT38499|1|1),upstream_gene_variant(MODIFIER||288||73|ECB_00818|protein_coding|CODING|ACT38500||1),upstream_gene_variant(MODIFIER||542||169|ECB_00819|protein_coding|CODING|ACT38501||1),upstream_gene_variant(MODIFIER||4266||271|ybjI|protein_coding|CODING|ACT38493||1),upstream_gene_variant(MODIFIE…	NA	NA	NA	NA	NO	882542	883105	-	G157A	-188.1	-187.09	7.57552e-06	4.91226e-06	129.71	98.65	0.4342	0.0403	1961-09-01	0.5357	0.7174	153-202	0.4478	0.941168	0.855772
892460	T	C	SNP	missense_variant	MODERATE	tAc/tGc	p.Tyr176Cys/c.527A>G	ECB_00832	EFF=missense_variant(MODERATE|MISSENSE|tAc/tGc|p.Tyr176Cys/c.527A>G|342|ECB_00832|protein_coding|CODING|ACT38514|1|1),upstream_gene_variant(MODIFIER||3041||111|ECB_00828|protein_coding|CODING|ACT38510||1),upstream_gene_variant(MODIFIER||2432||250|ECB_00834|protein_coding|CODING|ACT38516||1),upstream_gene_variant(MODIFIER||3178||48|ECB_00835|protein_coding|CODING|ACT38517||1),upstream_gene_variant…	NA	NA	NA	NA	NO	891958	892986	-	A527G	-361.52	-367.95	3.62927e-12	1.91144e-11	239.37	214.41	0.5362	0.0554	480-552	0.468	0.4517	480-549	0.2489	0.950232	0.947433
893031	C	T	SNP	synonymous_variant	LOW	ccG/ccA	p.Pro573Pro/c.1719G>A	ECB_00833	EFF=synonymous_variant(LOW|SILENT|ccG/ccA|p.Pro573Pro/c.1719G>A|588|ECB_00833|protein_coding|CODING|ACT38515|1|1),upstream_gene_variant(MODIFIER||3612||111|ECB_00828|protein_coding|CODING|ACT38510||1),upstream_gene_variant(MODIFIER||1861||250|ECB_00834|protein_coding|CODING|ACT38516||1),upstream_gene_variant(MODIFIER||2607||48|ECB_00835|protein_coding|CODING|ACT38517||1),upstream_gene_variant(MOD…	NA	NA	NA	NA	NO	892983	894749	-	G1719A	-740.27	-737.42	4.10984e-18	5.15954e-18	441.93	484.11	0.5663	0.0597	1688-1737	0.4434	0.4426	1702-1752	0.2209	0.993503	0.982821
894875	TT	T	DEL	upstream_gene_variant	MODIFIER	.	.	.	EFF=upstream_gene_variant(MODIFIER||16||250|ECB_00834|protein_coding|CODING|ACT38516||1),upstream_gene_variant(MODIFIER||762||48|ECB_00835|protein_coding|CODING|ACT38517||1),upstream_gene_variant(MODIFIER||905||142|ECB_00836|protein_coding|CODING|ACT38518||1),upstream_gene_variant(MODIFIER||1176||96|ECB_00837|protein_coding|CODING|ACT38519||1|WARNING_TRANSCRIPT_NO_START_CODON),upstream_gene_varia…	.	.	NA	NA	.	.	.	.	.	.	.	.	.	.	.	.	.	.	.	.	.	.	.	.
894888	G	A	SNP	upstream_gene_variant	MODIFIER	.	.	.	EFF=upstream_gene_variant(MODIFIER||4||250|ECB_00834|protein_coding|CODING|ACT38516||1),upstream_gene_variant(MODIFIER||750||48|ECB_00835|protein_coding|CODING|ACT38517||1),upstream_gene_variant(MODIFIER||893||142|ECB_00836|protein_coding|CODING|ACT38518||1),upstream_gene_variant(MODIFIER||1164||96|ECB_00837|protein_coding|CODING|ACT38519||1|WARNING_TRANSCRIPT_NO_START_CODON),upstream_gene_varian…	.	.	NA	NA	.	.	.	.	.	.	.	.	.	.	.	.	.	.	.	.	.	.	.	.
901257	C	CC	INS	frameshift_variant	HIGH	act/Cact	p.Thr270_Ala271fs/c.808_809insC	ECB_00845	EFF=frameshift_variant(HIGH||act/Cact|p.Thr270_Ala271fs/c.808_809insC|540|ECB_00845|protein_coding|CODING|ACT38527|1|1),upstream_gene_variant(MODIFIER||817||145|ECB_00846|protein_coding|CODING|ACT38528||1),upstream_gene_variant(MODIFIER||3335||268|ECB_00840|protein_coding|CODING|ACT38522||1),upstream_gene_variant(MODIFIER||2398||91|ECB_00849|protein_coding|CODING|ACT38531||1),upstream_gene_varian…	NA	NA	NA	NA	NO	.	.	.	.	.	.	.	.	.	.	.	.	.	.	.	.	.	.	.
901828	G	GGG	INS	frameshift_variant	HIGH	gca/gGGca	p.Ala460_Ala461fs/c.1379_1380insGG	ECB_00845	EFF=frameshift_variant(HIGH||gca/gGGca|p.Ala460_Ala461fs/c.1379_1380insGG|540|ECB_00845|protein_coding|CODING|ACT38527|1|1),upstream_gene_variant(MODIFIER||246||145|ECB_00846|protein_coding|CODING|ACT38528||1),upstream_gene_variant(MODIFIER||3906||268|ECB_00840|protein_coding|CODING|ACT38522||1),upstream_gene_variant(MODIFIER||1827||91|ECB_00849|protein_coding|CODING|ACT38531||1),upstream_gene_va…	NA	NA	NA	NA	NO	.	.	.	.	.	.	.	.	.	.	.	.	.	.	.	.	.	.	.
902559	A	G	SNP	synonymous_variant	LOW	gaT/gaC	p.Asp176Asp/c.528T>C	tfaE	EFF=synonymous_variant(LOW|SILENT|gaT/gaC|p.Asp176Asp/c.528T>C|200|tfaE|protein_coding|CODING|ACT38529|1|1),upstream_gene_variant(MODIFIER||4636||268|ECB_00840|protein_coding|CODING|ACT38522||1),upstream_gene_variant(MODIFIER||1097||91|ECB_00849|protein_coding|CODING|ACT38531||1),upstream_gene_variant(MODIFIER||1369||122|ECB_00850|protein_coding|CODING|ACT38532||1|WARNING_TRANSCRIPT_NO_START_CODO…	2	13	NA	NA	NO	902484	903086	-	T528C	-234.38	-231.41	9.00713e-06	1.31992e-05	90.3	102.71	0.5399	0.0444	432-529	0.5342	0.7561	436-528	0.4737	0.986658	0.907573
917351	A	G	SNP	upstream_gene_variant	MODIFIER	.	.	.	EFF=upstream_gene_variant(MODIFIER||3949||107|ybjQ|protein_coding|CODING|ACT38553||1),upstream_gene_variant(MODIFIER||4269||276|ybjR|protein_coding|CODING|ACT38554||1),upstream_gene_variant(MODIFIER||69||243|artJ|protein_coding|CODING|ACT38547||1),downstream_gene_variant(MODIFIER||222||222|artM|protein_coding|CODING|ACT38548||1),downstream_gene_variant(MODIFIER||4520||377|potG|protein_coding|CODI…	.	.	NA	NA	.	.	.	.	.	.	.	.	.	.	.	.	.	.	.	.	.	.	.	.
917462	C	T	SNP	upstream_gene_variant	MODIFIER	.	.	.	EFF=upstream_gene_variant(MODIFIER||3838||107|ybjQ|protein_coding|CODING|ACT38553||1),upstream_gene_variant(MODIFIER||4158||276|ybjR|protein_coding|CODING|ACT38554||1),upstream_gene_variant(MODIFIER||180||243|artJ|protein_coding|CODING|ACT38547||1),downstream_gene_variant(MODIFIER||111||222|artM|protein_coding|CODING|ACT38548||1),downstream_gene_variant(MODIFIER||4631||377|potG|protein_coding|COD…	.	.	NA	NA	.	.	.	.	.	.	.	.	.	.	.	.	.	.	.	.	.	.	.	.
919872	C	T	SNP	synonymous_variant	LOW	acG/acA	p.Thr190Thr/c.570G>A	artP	EFF=synonymous_variant(LOW|SILENT|acG/acA|p.Thr190Thr/c.570G>A|242|artP|protein_coding|CODING|ACT38551|1|1),upstream_gene_variant(MODIFIER||1428||107|ybjQ|protein_coding|CODING|ACT38553||1),upstream_gene_variant(MODIFIER||1748||276|ybjR|protein_coding|CODING|ACT38554||1),upstream_gene_variant(MODIFIER||2590||243|artJ|protein_coding|CODING|ACT38547||1),upstream_gene_variant(MODIFIER||1631||222|art…	267	185	COG4161	E	NO	919713	920441	-	G570A	-276.58	-276.58	4.3609e-09	7.06832e-09	225.09	232.37	0.5139	0.0175	567-616	0.7385	0.9039	567-616	0.684	0.994845	0.984896
924355	A	G	SNP	missense_variant	MODERATE	gTg/gCg	p.Val212Ala/c.635T>C	ybjT	EFF=missense_variant(MODERATE|MISSENSE|gTg/gCg|p.Val212Ala/c.635T>C|476|ybjT|protein_coding|CODING|ACT38556|1|1|WARNING_TRANSCRIPT_NO_START_CODON),upstream_gene_variant(MODIFIER||4660||243|artI|protein_coding|CODING|ACT38550||1),upstream_gene_variant(MODIFIER||3914||242|artP|protein_coding|CODING|ACT38551||1),upstream_gene_variant(MODIFIER||3181||171|ybjP|protein_coding|CODING|ACT38552||1),upstre…	26	44	COG0702	MG	NO	923559	924989	-	T635C	-619.47	-620.88	5.37168e-16	9.52987e-16	462.78	256.81	0.5786	0.0641	627-694	0.4239	0.5062	636-749	0.2814	0.962223	0.857485
928323	C	T	SNP	missense_variant	MODERATE	Gct/Act	p.Ala179Thr/c.535G>A	hcr	EFF=missense_variant(MODERATE|MISSENSE|Gct/Act|p.Ala179Thr/c.535G>A|322|hcr|protein_coding|CODING|ACT38559|1|1),upstream_gene_variant(MODIFIER||4863||337|ybjS|protein_coding|CODING|ACT38555||1),upstream_gene_variant(MODIFIER||3334||476|ybjT|protein_coding|CODING|ACT38556||1|WARNING_TRANSCRIPT_NO_START_CODON),upstream_gene_variant(MODIFIER||2322||333|ltaE|protein_coding|CODING|ACT38557||1),upstrea…	0	12	COG1018	C	NO	927889	928857	-	G535A	-451.75	-449.1	1.0218e-10	6.31622e-10	165.33	291.34	0.5486	0.173	521-733	0.1389	0.478	523-709	0.2642	0.82123	0.712031
931278	T	TT	INS	frameshift_variant	HIGH	gaa/gAaa	p.Glu96_Lys97fs/c.286_287insA	ybjE	EFF=frameshift_variant(HIGH||gaa/gAaa|p.Glu96_Lys97fs/c.286_287insA|299|ybjE|protein_coding|CODING|ACT38561|1|1),upstream_gene_variant(MODIFIER||3523||572|poxB|protein_coding|CODING|ACT38558||1),upstream_gene_variant(MODIFIER||1900||552|ybjD|protein_coding|CODING|ACT38563||1),upstream_gene_variant(MODIFIER||2422||322|hcr|protein_coding|CODING|ACT38559||1),upstream_gene_variant(MODIFIER||758||550|…	43	65	COG2431	S	NO	.	.	.	.	.	.	.	.	.	.	.	.	.	.	.	.	.	.	.
939272	A	G	SNP	missense_variant	MODERATE	Ttc/Ctc	p.Phe9Leu/c.25T>C	cspD	EFF=missense_variant(MODERATE|MISSENSE|Ttc/Ctc|p.Phe9Leu/c.25T>C|74|cspD|protein_coding|CODING|ACT38567|1|1),upstream_gene_variant(MODIFIER||347||106|clpS|protein_coding|CODING|ACT38568||1),upstream_gene_variant(MODIFIER||841||710|clpA|protein_coding|CODING|ACT38569||1|WARNING_TRANSCRIPT_NO_START_CODON),upstream_gene_variant(MODIFIER||3446||330|ybjX|protein_coding|CODING|ACT38564||1),downstream_g…	91	3136	COG1278	K	NO	939072	939296	-	T25C	-73.47	-75.28	0.00570348	0.00516635	39.3	42.37	0.4844	0.0207	1959-09-01	0.6375	0.7383	1959-09-01	0.3966	0.963049	0.949662
942603	G	GG	INS	upstream_gene_variant	MODIFIER	.	.	.	EFF=upstream_gene_variant(MODIFIER||3308||74|cspD|protein_coding|CODING|ACT38567||1),downstream_gene_variant(MODIFIER||339|||serW|tRNA|NON_CODING|ECB_t00022||1),downstream_gene_variant(MODIFIER||679||72|infA|protein_coding|CODING|ACT38570||1),downstream_gene_variant(MODIFIER||1182||234|aat|protein_coding|CODING|ACT38571||1),downstream_gene_variant(MODIFIER||3605||648|macB|protein_coding|CODING|AC…	.	.	NA	NA	.	.	.	.	.	.	.	.	.	.	.	.	.	.	.	.	.	.	.	.
942709	C	CC	INS	upstream_gene_variant	MODIFIER	.	.	.	EFF=upstream_gene_variant(MODIFIER||3414||74|cspD|protein_coding|CODING|ACT38567||1),downstream_gene_variant(MODIFIER||233|||serW|tRNA|NON_CODING|ECB_t00022||1),downstream_gene_variant(MODIFIER||573||72|infA|protein_coding|CODING|ACT38570||1),downstream_gene_variant(MODIFIER||1076||234|aat|protein_coding|CODING|ACT38571||1),downstream_gene_variant(MODIFIER||3711||648|macB|protein_coding|CODING|AC…	.	.	NA	NA	.	.	.	.	.	.	.	.	.	.	.	.	.	.	.	.	.	.	.	.
942781	G	GGGG	INS	upstream_gene_variant	MODIFIER	.	.	.	EFF=upstream_gene_variant(MODIFIER||3486||74|cspD|protein_coding|CODING|ACT38567||1),downstream_gene_variant(MODIFIER||161|||serW|tRNA|NON_CODING|ECB_t00022||1),downstream_gene_variant(MODIFIER||501||72|infA|protein_coding|CODING|ACT38570||1),downstream_gene_variant(MODIFIER||1004||234|aat|protein_coding|CODING|ACT38571||1),downstream_gene_variant(MODIFIER||3783||648|macB|protein_coding|CODING|AC…	.	.	NA	NA	.	.	.	.	.	.	.	.	.	.	.	.	.	.	.	.	.	.	.	.
944236	C	T	SNP	synonymous_variant	LOW	tcG/tcA	p.Ser85Ser/c.255G>A	aat	EFF=synonymous_variant(LOW|SILENT|tcG/tcA|p.Ser85Ser/c.255G>A|234|aat|protein_coding|CODING|ACT38571|1|1),upstream_gene_variant(MODIFIER||4940||74|cspD|protein_coding|CODING|ACT38567||1),upstream_gene_variant(MODIFIER||1206|||serW|tRNA|NON_CODING|ECB_t00022||1),upstream_gene_variant(MODIFIER||735||72|infA|protein_coding|CODING|ACT38570||1),downstream_gene_variant(MODIFIER||296||573|cydC|protein_c…	56	75	COG2360	O	NO	943786	944490	-	G255A	-286.44	-287.3	4.85509e-08	7.63299e-08	138.4	133.97	0.5661	0.0132	228-277	0.7965	0.9652	232-281	0.83	0.997273	0.977234
946107	C	T	SNP	synonymous_variant	LOW	gcG/gcA	p.Ala49Ala/c.147G>A	cydC	EFF=synonymous_variant(LOW|SILENT|gcG/gcA|p.Ala49Ala/c.147G>A|573|cydC|protein_coding|CODING|ACT38572|1|1),upstream_gene_variant(MODIFIER||3077|||serW|tRNA|NON_CODING|ECB_t00022||1),upstream_gene_variant(MODIFIER||2606||72|infA|protein_coding|CODING|ACT38570||1),upstream_gene_variant(MODIFIER||1617||234|aat|protein_coding|CODING|ACT38571||1),upstream_gene_variant(MODIFIER||3546||164|lrp|protein_c…	56	51	COG4987	CO	NO	944532	946253	-	G147A	-735.14	-734.19	5.34305e-14	4.35044e-14	207.49	202.04	0.562	0.1538	115-164	0.1775	0.9108	105-168	0.7148	0.995901	0.995169
950762	A	G	SNP	missense_variant	MODERATE	Agc/Ggc	p.Ser161Gly/c.481A>G	ftsK	EFF=missense_variant(MODERATE|MISSENSE|Agc/Ggc|p.Ser161Gly/c.481A>G|1342|ftsK|protein_coding|CODING|ACT38576|1|1),upstream_gene_variant(MODIFIER||4509||573|cydC|protein_coding|CODING|ACT38572||1),upstream_gene_variant(MODIFIER||2742||588|cydD|protein_coding|CODING|ACT38573||1),upstream_gene_variant(MODIFIER||1654||321|trxB|protein_coding|CODING|ACT38574||1),upstream_gene_variant(MODIFIER||3700||2…	160	100	COG1674	D	YES	950282	954310	+	A481G	-1719.15	-1718.9	6.49676e-41	6.2063e-41	828.89	882.19	0.5062	0.0008	452-501	0.9788	0.9986	451-501	0.9749	0.97736	0.878496
954619	C	T	SNP	missense_variant	MODERATE	gCg/gTg	p.Ala53Val/c.158C>T	lolA	EFF=missense_variant(MODERATE|MISSENSE|gCg/gTg|p.Ala53Val/c.158C>T|204|lolA|protein_coding|CODING|ACT38577|1|1),upstream_gene_variant(MODIFIER||468||447|ycaJ|protein_coding|CODING|ACT38578||1|WARNING_TRANSCRIPT_NO_START_CODON),upstream_gene_variant(MODIFIER||1902||430|serS|protein_coding|CODING|ACT38579||1),upstream_gene_variant(MODIFIER||3433||814|dmsA|protein_coding|CODING|ACT38580||1),downstre…	137	96	COG2834	M	NO	954462	955076	+	C158T	-211.91	-211.53	2.60906e-08	2.5352e-08	193.86	210.88	0.5028	0.1421	88-158	0.1907	0.5219	103-157	0.2961	0.917023	0.923694
958375	T	C	SNP	synonymous_variant	LOW	cgT/cgC	p.Arg108Arg/c.324T>C	dmsA	EFF=synonymous_variant(LOW|SILENT|cgT/cgC|p.Arg108Arg/c.324T>C|814|dmsA|protein_coding|CODING|ACT38580|1|1),upstream_gene_variant(MODIFIER||2132||205|dmsB|protein_coding|CODING|ACT38581||1),upstream_gene_variant(MODIFIER||2751||287|dmsC|protein_coding|CODING|ACT38582||1),upstream_gene_variant(MODIFIER||4589||382|ycaD|protein_coding|CODING|ACT38584||1),downstream_gene_variant(MODIFIER||4065||1342|…	1	17	COG0243	C	NO	958052	960496	+	T324C	-1020.4	-1019.45	1.40873e-24	9.00023e-25	490.22	501.23	0.5511	0.186	270-338	0.1228	0.2036	260-336	0.1369	0.970824	0.937812
967288	A	G	SNP	synonymous_variant	LOW	gaA/gaG	p.Glu176Glu/c.528A>G	ycaK	EFF=synonymous_variant(LOW|SILENT|gaA/gaG|p.Glu176Glu/c.528A>G|196|ycaK|protein_coding|CODING|ACT38587|1|1),upstream_gene_variant(MODIFIER||4638||208|ycaC|protein_coding|CODING|ACT38583||1),upstream_gene_variant(MODIFIER||627||302|ycaN|protein_coding|CODING|ACT38586||1),downstream_gene_variant(MODIFIER||145||246|pflA|protein_coding|CODING|ACT38588||1),downstream_gene_variant(MODIFIER||1077||760|p…	10	66	COG2249	R	NO	966761	967351	+	A528G	-211.79	-212.6	3.28653e-07	4.25544e-07	94.42	101.15	0.4015	0.0251	527-589	0.6549	0.7439	527-591	0.4671	0.964586	0.94971
971387	C	T	SNP	missense_variant	MODERATE	gGc/gAc	p.Gly58Asp/c.173G>A	focA	EFF=missense_variant(MODERATE|MISSENSE|gGc/gAc|p.Gly58Asp/c.173G>A|285|focA|protein_coding|CODING|ACT38590|1|1|WARNING_TRANSCRIPT_NO_START_CODON),upstream_gene_variant(MODIFIER||4726||302|ycaN|protein_coding|CODING|ACT38586||1),upstream_gene_variant(MODIFIER||3214||246|pflA|protein_coding|CODING|ACT38588||1),upstream_gene_variant(MODIFIER||2467||230|ycaP|protein_coding|CODING|ACT38592||1),upstrea…	117	264	COG2116	P	NO	970702	971559	-	G173A	-320.39	-321.41	2.10821e-09	3.97823e-09	283.51	258.44	0.5013	0.0104	160-297	0.8405	0.9699	162-293	0.852	0.948381	0.952891
979996	G	A	SNP	missense_variant	MODERATE	Gta/Ata	p.Val304Ile/c.910G>A	rpsA	EFF=missense_variant(MODERATE|MISSENSE|Gta/Ata|p.Val304Ile/c.910G>A|557|rpsA|protein_coding|CODING|ACT38597|1|1),upstream_gene_variant(MODIFIER||924||94|himD|protein_coding|CODING|ACT38598||1),upstream_gene_variant(MODIFIER||1416||754|ycaI|protein_coding|CODING|ACT38599||1),upstream_gene_variant(MODIFIER||3717||582|msbA|protein_coding|CODING|ACT38600||1),downstream_gene_variant(MODIFIER||4163||36…	9436	1606	COG0539	J	YES	979087	980760	+	G910A	-665.01	-663.59	5.81172e-19	1.66044e-19	445.04	290.37	0.5187	0.1578	760-936	0.1609	0.156	848-929	0.1209	0.999216	0.977122
981105	T	C	SNP	synonymous_variant	LOW	cgT/cgC	p.Arg62Arg/c.186T>C	himD	EFF=synonymous_variant(LOW|SILENT|cgT/cgC|p.Arg62Arg/c.186T>C|94|himD|protein_coding|CODING|ACT38598|1|1),upstream_gene_variant(MODIFIER||307||754|ycaI|protein_coding|CODING|ACT38599||1),upstream_gene_variant(MODIFIER||2608||582|msbA|protein_coding|CODING|ACT38600||1),upstream_gene_variant(MODIFIER||4353||328|lpxK|protein_coding|CODING|ACT38601||1),downstream_gene_variant(MODIFIER||3918||427|aroA…	767	787	COG0776	L	NO	980920	981204	+	T186C	-88.51	-88.51	0.00228778	0.00046543	73	65.79	0.4912	0.0126	136-203	0.7692	0.9749	102-203	0.8492	0.985801	0.915435
985938	A	G	SNP	missense_variant	MODERATE	Att/Gtt	p.Ile161Val/c.481A>G	lpxK	EFF=missense_variant(MODERATE|MISSENSE|Att/Gtt|p.Ile161Val/c.481A>G|328|lpxK|protein_coding|CODING|ACT38601|1|1),upstream_gene_variant(MODIFIER||543||410|ycaQ|protein_coding|CODING|ACT38602||1),upstream_gene_variant(MODIFIER||1827||60|ycaR|protein_coding|CODING|ACT38603||1),upstream_gene_variant(MODIFIER||2006||248|kdsB|protein_coding|CODING|ACT38604||1),upstream_gene_variant(MODIFIER||2906||297|…	61	26	COG1663	M	YES	985458	986444	+	A481G	-462.43	-459.65	9.20932e-10	1.2433e-10	273.28	282.86	0.5586	0.2761	435-489	0.0539	0.6136	439-488	0.3569	0.980334	0.970643
989415	A	G	SNP	missense_variant	MODERATE	gAc/gGc	p.Asp191Gly/c.572A>G	ycbJ	EFF=missense_variant(MODERATE|MISSENSE|gAc/gGc|p.Asp191Gly/c.572A>G|297|ycbJ|protein_coding|CODING|ACT38605|1|1),upstream_gene_variant(MODIFIER||1214||261|smtA|protein_coding|CODING|ACT38607||1),upstream_gene_variant(MODIFIER||1996||440|mukF|protein_coding|CODING|ACT38608||1),upstream_gene_variant(MODIFIER||3326||225|mukE|protein_coding|CODING|ACT38609||1),upstream_gene_variant(MODIFIER||4003||14…	5	39	NA	NA	NO	988844	989737	+	A572G	-362.13	-361.11	4.8763e-11	4.32572e-11	191.34	197.24	0.5262	0.114	416-685	0.2488	0.4798	592-643	0.2653	0.999727	0.998614
990122	C	T	SNP	synonymous_variant	LOW	ctG/ctA	p.Leu124Leu/c.372G>A	ycbC	EFF=synonymous_variant(LOW|SILENT|ctG/ctA|p.Leu124Leu/c.372G>A|259|ycbC|protein_coding|CODING|ACT38606|1|1),upstream_gene_variant(MODIFIER||507||261|smtA|protein_coding|CODING|ACT38607||1),upstream_gene_variant(MODIFIER||1289||440|mukF|protein_coding|CODING|ACT38608||1),upstream_gene_variant(MODIFIER||2619||225|mukE|protein_coding|CODING|ACT38609||1),upstream_gene_variant(MODIFIER||3296||1486|muk…	23	55	COG1434	S	NO	989714	990493	-	G372A	-321.15	-319.24	5.75197e-08	4.60067e-08	202.16	179.12	0.5287	0.1558	330-379	0.1641	0.4998	330-383	0.2774	0.964437	0.970454
992050	A	G	SNP	missense_variant	MODERATE	Acg/Gcg	p.Thr214Ala/c.640A>G	mukF	EFF=missense_variant(MODERATE|MISSENSE|Acg/Gcg|p.Thr214Ala/c.640A>G|440|mukF|protein_coding|CODING|ACT38608|1|1),upstream_gene_variant(MODIFIER||691||225|mukE|protein_coding|CODING|ACT38609||1),upstream_gene_variant(MODIFIER||1368||1486|mukB|protein_coding|CODING|ACT38610||1),upstream_gene_variant(MODIFIER||1557||259|ycbC|protein_coding|CODING|ACT38606||1),downstream_gene_variant(MODIFIER||4337||…	66	37	COG3006	D	YES	991411	992733	+	A640G	-564.35	-564.43	8.12951e-12	3.19684e-12	273.63	275.9	0.5162	0.0089	599-671	0.8491	0.9458	598-697	0.7796	0.99602	0.990543
997788	A	G	SNP	synonymous_variant	LOW	gaA/gaG	p.Glu1457Glu/c.4371A>G	mukB	EFF=synonymous_variant(LOW|SILENT|gaA/gaG|p.Glu1457Glu/c.4371A>G|1486|mukB|protein_coding|CODING|ACT38610|1|1),upstream_gene_variant(MODIFIER||351||615|ycbB|protein_coding|CODING|ACT38611||1),upstream_gene_variant(MODIFIER||2379||182|ycbK|protein_coding|CODING|ACT38612||1),upstream_gene_variant(MODIFIER||2954||215|ycbL|protein_coding|CODING|ACT38613||1),downstream_gene_variant(MODIFIER||4370||225…	161	74	COG3096	D	YES	993418	997878	+	A4371G	-2010.77	-2010.77	4.59023e-41	2.94611e-42	866.03	968.28	0.5395	0.0069	4352-4401	0.8754	0.9715	4348-4404	0.845	0.995504	0.995952
998942	G	GG	INS	frameshift_variant	HIGH	ccg/Gccg	p.Pro269_Lys270fs/c.805_806insG	ycbB	EFF=frameshift_variant(HIGH||ccg/Gccg|p.Pro269_Lys270fs/c.805_806insG|615|ycbB|protein_coding|CODING|ACT38611|1|1),upstream_gene_variant(MODIFIER||1224||182|ycbK|protein_coding|CODING|ACT38612||1),upstream_gene_variant(MODIFIER||1799||215|ycbL|protein_coding|CODING|ACT38613||1),downstream_gene_variant(MODIFIER||2668||396|aspC|protein_coding|CODING|ACT38614||1),downstream_gene_variant(MODIFIER||10…	42	99	NA	NA	NO	.	.	.	.	.	.	.	.	.	.	.	.	.	.	.	.	.	.	.
1002295	A	G	SNP	synonymous_variant	LOW	gcT/gcC	p.Ala169Ala/c.507T>C	aspC	EFF=synonymous_variant(LOW|SILENT|gcT/gcC|p.Ala169Ala/c.507T>C|396|aspC|protein_coding|CODING|ACT38614|1|1),downstream_gene_variant(MODIFIER||4417||1486|mukB|protein_coding|CODING|ACT38610||1),downstream_gene_variant(MODIFIER||691||362|ompF|protein_coding|CODING|ACT38615||1),downstream_gene_variant(MODIFIER||2381||466|asnS|protein_coding|CODING|ACT38616||1),downstream_gene_variant(MODIFIER||2309|…	58	268	COG1448	E	NO	1001611	1002801	-	T507C	-471.58	-469.6	1.38972e-14	1.41741e-14	247.3	247.28	0.5237	0.0179	479-528	0.7447	0.9177	479-528	0.7192	0.995048	0.999909
1004106	A	G	SNP	upstream_gene_variant	MODIFIER	.	.	.	EFF=upstream_gene_variant(MODIFIER||3607||870|pepN|protein_coding|CODING|ACT38618||1),upstream_gene_variant(MODIFIER||1305||396|aspC|protein_coding|CODING|ACT38614||1),upstream_gene_variant(MODIFIER||32||362|ompF|protein_coding|CODING|ACT38615||1),downstream_gene_variant(MODIFIER||570||466|asnS|protein_coding|CODING|ACT38616||1),downstream_gene_variant(MODIFIER||4120||615|ycbB|protein_coding|CODI…	.	.	NA	NA	.	.	.	.	.	.	.	.	.	.	.	.	.	.	.	.	.	.	.	.
1004385	T	C	SNP	upstream_gene_variant	MODIFIER	.	.	.	EFF=upstream_gene_variant(MODIFIER||3328||870|pepN|protein_coding|CODING|ACT38618||1),upstream_gene_variant(MODIFIER||1584||396|aspC|protein_coding|CODING|ACT38614||1),upstream_gene_variant(MODIFIER||311||362|ompF|protein_coding|CODING|ACT38615||1),downstream_gene_variant(MODIFIER||291||466|asnS|protein_coding|CODING|ACT38616||1),downstream_gene_variant(MODIFIER||4399||615|ycbB|protein_coding|COD…	.	.	NA	NA	.	.	.	.	.	.	.	.	.	.	.	.	.	.	.	.	.	.	.	.
1006690	C	T	SNP	missense_variant	MODERATE	gGc/gAc	p.Gly253Asp/c.758G>A	pncB	EFF=missense_variant(MODERATE|MISSENSE|gGc/gAc|p.Gly253Asp/c.758G>A|400|pncB|protein_coding|CODING|ACT38617|1|1),upstream_gene_variant(MODIFIER||1023||870|pepN|protein_coding|CODING|ACT38618||1),upstream_gene_variant(MODIFIER||3889||396|aspC|protein_coding|CODING|ACT38614||1),upstream_gene_variant(MODIFIER||2616||362|ompF|protein_coding|CODING|ACT38615||1),upstream_gene_variant(MODIFIER||614||466…	240	238	COG1488	H	NO	1006245	1007447	-	G595A-G758A	-454.92	-452.08	2.25289e-12	3.31334e-13	292.03	245.67	0.5319	0.12	752-818	0.2341	0.1431	746-811	0.1168	0.93117	0.918037
1006853	C	T	SNP	missense_variant	MODERATE	Gtg/Atg	p.Val199Met/c.595G>A	pncB	EFF=missense_variant(MODERATE|MISSENSE|Gtg/Atg|p.Val199Met/c.595G>A|400|pncB|protein_coding|CODING|ACT38617|1|1),upstream_gene_variant(MODIFIER||860||870|pepN|protein_coding|CODING|ACT38618||1),upstream_gene_variant(MODIFIER||4052||396|aspC|protein_coding|CODING|ACT38614||1),upstream_gene_variant(MODIFIER||2779||362|ompF|protein_coding|CODING|ACT38615||1),upstream_gene_variant(MODIFIER||777||466|…	240	238	COG1488	H	NO	1006245	1007447	-	G595A-G758A	-454.92	-452.08	2.25289e-12	3.31334e-13	292.03	245.67	0.5319	0.12	752-818	0.2341	0.1431	746-811	0.1168	0.93117	0.918037
1008234	A	G	SNP	synonymous_variant	LOW	gtA/gtG	p.Val174Val/c.522A>G	pepN	EFF=synonymous_variant(LOW|SILENT|gtA/gtG|p.Val174Val/c.522A>G|870|pepN|protein_coding|CODING|ACT38618|1|1),upstream_gene_variant(MODIFIER||4160||362|ompF|protein_coding|CODING|ACT38615||1),upstream_gene_variant(MODIFIER||2158||466|asnS|protein_coding|CODING|ACT38616||1),upstream_gene_variant(MODIFIER||787||400|pncB|protein_coding|CODING|ACT38617||1),downstream_gene_variant(MODIFIER||2134||255|ss…	53	97	COG0308	E	NO	1007713	1010325	+	A522G	-1060.98	-1060.98	1.12895e-26	6.56801e-27	644.41	643.21	0.5411	0.0002	506-573	0.9945	0.9998	460-550	0.9915	0.919508	0.920077
1015936	T	C	SNP	missense_variant	MODERATE	gTc/gCc	p.Val119Ala/c.356T>C	ycbR	EFF=missense_variant(MODERATE|MISSENSE|gTc/gCc|p.Val119Ala/c.356T>C|233|ycbR|protein_coding|CODING|ACT38625|1|1),upstream_gene_variant(MODIFIER||4801||255|ssuB|protein_coding|CODING|ACT38619||1),upstream_gene_variant(MODIFIER||371||866|ycbS|protein_coding|CODING|ACT38626||1),upstream_gene_variant(MODIFIER||4013||263|ssuC|protein_coding|CODING|ACT38620||1),upstream_gene_variant(MODIFIER||2857||381…	1	61	COG3121	NU	NO	1015581	1016282	+	T356C	-222.27	-220.41	1.74721e-08	9.65332e-09	101.17	105.92	0.4613	0.0363	352-517	0.5263	0.8786	353-509	0.6238	0.951374	0.923289
1018575	G	A	SNP	missense_variant	MODERATE	Gat/Aat	p.Asp757Asn/c.2269G>A	ycbS	EFF=missense_variant(MODERATE|MISSENSE|Gat/Aat|p.Asp757Asn/c.2269G>A|866|ycbS|protein_coding|CODING|ACT38626|1|1),upstream_gene_variant(MODIFIER||323||356|ycbT|protein_coding|CODING|ACT38627||1),upstream_gene_variant(MODIFIER||4540||319|ssuA|protein_coding|CODING|ACT38622||1),upstream_gene_variant(MODIFIER||3972||191|ssuE|protein_coding|CODING|ACT38623||1),upstream_gene_variant(MODIFIER||1405||18…	2	34	COG3188	NU	NO	1016307	1018907	+	G2269A	-958.51	-956.62	1.1517e-32	1.51156e-33	535.5	540.57	0.5237	0.0112	2223-2272	0.82	0.9301	2220-2272	0.7444	0.999059	0.993566
1019368	GG	G	DEL	frameshift_variant	HIGH	gca/	p.Ala158fs/c.472delG	ycbT	EFF=frameshift_variant(HIGH||gca/|p.Ala158fs/c.472delG|356|ycbT|protein_coding|CODING|ACT38627|1|1),upstream_gene_variant(MODIFIER||4766||191|ssuE|protein_coding|CODING|ACT38623||1),upstream_gene_variant(MODIFIER||611||180|ycbU|protein_coding|CODING|ACT38628||1),upstream_gene_variant(MODIFIER||1161||171|ycbV|protein_coding|CODING|ACT38629||1),upstream_gene_variant(MODIFIER||1669||236|ycbF|protein…	3	35	COG3539	NU	NO	.	.	.	.	.	.	.	.	.	.	.	.	.	.	.	.	.	.	.
1029219	C	T	SNP	missense_variant	MODERATE	gCg/gTg	p.Ala43Val/c.128C>T	pqiA	EFF=missense_variant(MODERATE|MISSENSE|gCg/gTg|p.Ala43Val/c.128C>T|417|pqiA|protein_coding|CODING|ACT38636|1|1),upstream_gene_variant(MODIFIER||4528||369|ycbX|protein_coding|CODING|ACT38633||1|WARNING_TRANSCRIPT_NO_START_CODON),upstream_gene_variant(MODIFIER||1131||546|pqiB|protein_coding|CODING|ACT38637||1),upstream_gene_variant(MODIFIER||2783||182|ymbA|protein_coding|CODING|ACT38638||1|WARNING_…	114	58	COG2995	S	NO	1029092	1030345	+	C128T	-549.85	-547.75	1.10631e-13	7.60288e-14	328.7	333.31	0.5396	0.0262	114-163	0.6737	0.9641	116-165	0.8224	0.998242	0.990611
1030441	C	T	SNP	missense_variant	MODERATE	gCc/gTc	p.Ala31Val/c.92C>T	pqiB	EFF=missense_variant(MODERATE|MISSENSE|gCc/gTc|p.Ala31Val/c.92C>T|546|pqiB|protein_coding|CODING|ACT38637|1|1),upstream_gene_variant(MODIFIER||1561||182|ymbA|protein_coding|CODING|ACT38638||1|WARNING_TRANSCRIPT_NO_START_CODON),upstream_gene_variant(MODIFIER||2365||55|rmf|protein_coding|CODING|ACT38639||1),downstream_gene_variant(MODIFIER||3398||702|ycbY|protein_coding|CODING|ACT38634||1),downstre…	104	45	COG3008	R	NO	1030350	1031990	+	C92T	-657.66	-659.52	1.13449e-18	5.27533e-19	309.32	313.77	0.4932	0.1947	16-103	0.0855	0.1602	24-102	0.1014	0.989889	0.989162
1036526	C	T	SNP	missense_variant	MODERATE	Gca/Aca	p.Ala207Thr/c.619G>A	ompA	EFF=missense_variant(MODERATE|MISSENSE|Gca/Aca|p.Ala207Thr/c.619G>A|346|ompA|protein_coding|CODING|ACT38643|1|1),upstream_gene_variant(MODIFIER||1703||209|yccR|protein_coding|CODING|ACT38645||1),upstream_gene_variant(MODIFIER||2965||172|fabA|protein_coding|CODING|ACT38640||1),upstream_gene_variant(MODIFIER||1136||586|ycbZ|protein_coding|CODING|ACT38641||1),downstream_gene_variant(MODIFIER||4536||…	15788	10492	COG2885	M	NO	1036104	1037144	-	G619A	-424.09	-422.75	1.69686e-09	1.78693e-09	304.58	262.83	0.5611	0.0087	429-620	0.8509	0.9827	429-619	0.8879	0.890824	0.708091
1037343	A	AA	INS	upstream_gene_variant	MODIFIER	.	.	.	EFF=upstream_gene_variant(MODIFIER||885||209|yccR|protein_coding|CODING|ACT38645||1),upstream_gene_variant(MODIFIER||3783||172|fabA|protein_coding|CODING|ACT38640||1),upstream_gene_variant(MODIFIER||1954||586|ycbZ|protein_coding|CODING|ACT38641||1),upstream_gene_variant(MODIFIER||4218||684|helD|protein_coding|CODING|ACT38648||1),upstream_gene_variant(MODIFIER||200||346|ompA|protein_coding|CODING|…	.	.	NA	NA	.	.	.	.	.	.	.	.	.	.	.	.	.	.	.	.	.	.	.	.
1040587	T	C	SNP	missense_variant	MODERATE	Aca/Gca	p.Thr130Ala/c.388A>G	yccS	EFF=missense_variant(MODERATE|MISSENSE|Aca/Gca|p.Thr130Ala/c.388A>G|717|yccS|protein_coding|CODING|ACT38646|1|1),upstream_gene_variant(MODIFIER||975||684|helD|protein_coding|CODING|ACT38648||1),upstream_gene_variant(MODIFIER||3443||346|ompA|protein_coding|CODING|ACT38643||1),upstream_gene_variant(MODIFIER||2577||169|sulA|protein_coding|CODING|ACT38644||1),upstream_gene_variant(MODIFIER||4450||137…	76	28	COG1289	S	NO	1038821	1040974	-	A388G	-895.37	-895.33	5.8772e-23	4.62589e-23	465.05	464.74	0.5162	0.0004	387-455	0.989	0.9983	388-454	0.9723	0.99985	0.996676
1041051	A	G	SNP	missense_variant	MODERATE	gTa/gCa	p.Val130Ala/c.389T>C	yccF	EFF=missense_variant(MODERATE|MISSENSE|gTa/gCa|p.Val130Ala/c.389T>C|148|yccF|protein_coding|CODING|ACT38647|1|1),upstream_gene_variant(MODIFIER||511||684|helD|protein_coding|CODING|ACT38648||1),upstream_gene_variant(MODIFIER||3907||346|ompA|protein_coding|CODING|ACT38643||1),upstream_gene_variant(MODIFIER||3041||169|sulA|protein_coding|CODING|ACT38644||1),upstream_gene_variant(MODIFIER||3986||137…	167	84	COG3304	S	NO	1040993	1041439	-	T389C	-172.28	-167.58	1.98291e-06	1.17179e-06	88.61	99.09	0.4865	0.4224	315-437	0.0095	-0.4899	350-417	0.0082	0.973295	0.995476
1042439	T	C	SNP	missense_variant	MODERATE	gTc/gCc	p.Val293Ala/c.878T>C	helD	EFF=missense_variant(MODERATE|MISSENSE|gTc/gCc|p.Val293Ala/c.878T>C|684|helD|protein_coding|CODING|ACT38648|1|1),upstream_gene_variant(MODIFIER||4429||169|sulA|protein_coding|CODING|ACT38644||1),upstream_gene_variant(MODIFIER||2598||137|yccU|protein_coding|CODING|ACT38651||1),upstream_gene_variant(MODIFIER||1465||717|yccS|protein_coding|CODING|ACT38646||1),upstream_gene_variant(MODIFIER||1000||14…	41	58	COG0210	L	NO	1041562	1043616	+	T878C	-898.05	-899.19	4.89187e-20	5.41655e-20	400.48	400.03	0.5461	0.1175	853-902	0.2401	0.5307	868-923	0.2973	0.98993	0.995459
1046159	G	A	SNP	missense_variant	MODERATE	cCg/cTg	p.Pro272Leu/c.815C>T	yccW	EFF=missense_variant(MODERATE|MISSENSE|cCg/cTg|p.Pro272Leu/c.815C>T|367|yccW|protein_coding|CODING|ACT38653|1|1),upstream_gene_variant(MODIFIER||4720||148|yccF|protein_coding|CODING|ACT38647||1),upstream_gene_variant(MODIFIER||996||92|yccX|protein_coding|CODING|ACT38654||1),upstream_gene_variant(MODIFIER||2053||152|mgsA|protein_coding|CODING|ACT38649||1),upstream_gene_variant(MODIFIER||3071||372|…	279	63	COG1092	R	NO	1045870	1046973	-	C815T	-454.25	-454.34	8.94178e-13	1.04915e-12	220.11	217.03	0.4913	0.0468	762-817	0.4526	0.7939	760-811	0.5004	0.959727	0.971347
1049752	C	T	SNP	stop_gained	HIGH	Cag/Tag	p.Gln175*/c.523C>T	hyaA	EFF=stop_gained(HIGH|NONSENSE|Cag/Tag|p.Gln175*/c.523C>T|372|hyaA|protein_coding|CODING|ACT38657|1|1),upstream_gene_variant(MODIFIER||4888||220|yccT|protein_coding|CODING|ACT38650||1),upstream_gene_variant(MODIFIER||593||597|hyaB|protein_coding|CODING|ACT38658||1),upstream_gene_variant(MODIFIER||3940||105|yccV|protein_coding|CODING|ACT38652||1),upstream_gene_variant(MODIFIER||2779||367|yccW|prote…	0	39	COG1740	C	NO	1049230	1050348	+	C523T	-461.96	-461.33	1.46502e-11	6.61205e-13	351.65	276.62	0.5636	0.1377	476-526	0.196	0.137	475-524	0.1149	0.962152	0.847838
1052079	T	C	SNP	missense_variant	MODERATE	Tgt/Cgt	p.Cys579Arg/c.1735T>C	hyaB	EFF=missense_variant(MODERATE|MISSENSE|Tgt/Cgt|p.Cys579Arg/c.1735T>C|597|hyaB|protein_coding|CODING|ACT38658|1|1),upstream_gene_variant(MODIFIER||78||235|hyaC|protein_coding|CODING|ACT38659||1),upstream_gene_variant(MODIFIER||4320||109|yccK|protein_coding|CODING|ACT38655||1),upstream_gene_variant(MODIFIER||782||195|hyaD|protein_coding|CODING|ACT38660||1),upstream_gene_variant(MODIFIER||1366||132|…	0	17	COG0374	C	NO	1050345	1052138	+	T1735C	-762.74	-765.1	2.00068e-20	2.25719e-20	480.64	476.7	0.6077	0.011	1719-1768	0.8457	0.9738	1718-1768	0.8643	0.999037	0.99619
1053680	A	G	SNP	missense_variant	MODERATE	cAg/cGg	p.Gln79Arg/c.236A>G	hyaE	EFF=missense_variant(MODERATE|MISSENSE|cAg/cGg|p.Gln79Arg/c.236A>G|132|hyaE|protein_coding|CODING|ACT38661|1|1),upstream_gene_variant(MODIFIER||4877|||serT|tRNA|NON_CODING|ECB_t00023||1),upstream_gene_variant(MODIFIER||160||285|hyaF|protein_coding|CODING|ACT38662||1),upstream_gene_variant(MODIFIER||1151||514|appC|protein_coding|CODING|ACT38663||1),upstream_gene_variant(MODIFIER||2707||378|appB|pr…	1	13	COG0526	OC	NO	1053445	1053843	+	A236G	-174.74	-175.89	0.000158525	0.000502648	46.98	110.1	0.5714	0.0817	216-274	0.337	0.5627	218-267	0.3009	0.957419	0.912908
1060737	T	C	SNP	missense_variant	MODERATE	Atc/Gtc	p.Ile189Val/c.565A>G	yccC	EFF=missense_variant(MODERATE|MISSENSE|Atc/Gtc|p.Ile189Val/c.565A>G|726|yccC|protein_coding|CODING|ACT38666|1|1),downstream_gene_variant(MODIFIER||584||148|yccY|protein_coding|CODING|ACT38667||1),downstream_gene_variant(MODIFIER||4362||514|appC|protein_coding|CODING|ACT38663||1),downstream_gene_variant(MODIFIER||1018||379|yccZ|protein_coding|CODING|ACT38668||1),downstream_gene_variant(MODIFIER||3…	16	43	COG0192	H	YES	1059121	1061301	-	A565G	-906.9	-908.23	4.73665e-20	2.74124e-20	381.08	532.65	0.5037	0.1002	514-574	0.2869	0.3798	519-572	0.2108	0.99373	0.984382
1062292	C	CCC	INS	frameshift_variant	HIGH	gcg/gcGGg	p.Ala201_Gly202fs/c.602_603insGG	yccZ	EFF=frameshift_variant(HIGH||gcg/gcGGg|p.Ala201_Gly202fs/c.602_603insGG|379|yccZ|protein_coding|CODING|ACT38668|1|1),upstream_gene_variant(MODIFIER||992||726|yccC|protein_coding|CODING|ACT38666||1),upstream_gene_variant(MODIFIER||526||148|yccY|protein_coding|CODING|ACT38667||1),downstream_gene_variant(MODIFIER||4770||378|appB|protein_coding|CODING|ACT38664||1),downstream_gene_variant(MODIFIER||64…	6	20	COG1596	M	NO	.	.	.	.	.	.	.	.	.	.	.	.	.	.	.	.	.	.	.
1069806	G	GG	INS	frameshift_variant	HIGH	gcc/gCcc	p.Ala888_Pro889fs/c.2662_2663insC	torS	EFF=frameshift_variant(HIGH||gcc/gCcc|p.Ala888_Pro889fs/c.2662_2663insC|914|torS|protein_coding|CODING|ACT38678|1|1|WARNING_TRANSCRIPT_NO_START_CODON),upstream_gene_variant(MODIFIER||4771||698|ymcA|protein_coding|CODING|ACT38669||1),upstream_gene_variant(MODIFIER||4025||248|ymcB|protein_coding|CODING|ACT38670||1),upstream_gene_variant(MODIFIER||3384||214|ymcC|protein_coding|CODING|ACT38671||1|WAR…	3	20	COG0642	T	NO	.	.	.	.	.	.	.	.	.	.	.	.	.	.	.	.	.	.	.
1069908	TT	T	DEL	frameshift_variant	HIGH	aaa/	p.Lys854fs/c.2560delA	torS	EFF=frameshift_variant(HIGH||aaa/|p.Lys854fs/c.2560delA|914|torS|protein_coding|CODING|ACT38678|1|1|WARNING_TRANSCRIPT_NO_START_CODON),upstream_gene_variant(MODIFIER||4873||698|ymcA|protein_coding|CODING|ACT38669||1),upstream_gene_variant(MODIFIER||4127||248|ymcB|protein_coding|CODING|ACT38670||1),upstream_gene_variant(MODIFIER||3486||214|ymcC|protein_coding|CODING|ACT38671||1|WARNING_TRANSCRIPT_…	3	20	COG0642	T	NO	.	.	.	.	.	.	.	.	.	.	.	.	.	.	.	.	.	.	.
1072664	G	A	SNP	synonymous_variant	LOW	ccG/ccA	p.Pro38Pro/c.114G>A	torT	EFF=synonymous_variant(LOW|SILENT|ccG/ccA|p.Pro38Pro/c.114G>A|342|torT|protein_coding|CODING|ACT38679|1|1),upstream_gene_variant(MODIFIER||1710||390|torC|protein_coding|CODING|ACT38681||1),upstream_gene_variant(MODIFIER||3012||357|yccM|protein_coding|CODING|ACT38677||1),upstream_gene_variant(MODIFIER||2882||848|torA|protein_coding|CODING|ACT38682||1),upstream_gene_variant(MODIFIER||196||914|torS|…	2	21	COG1879	G	NO	1072551	1073579	+	G114A-A848G	-447.73	-446.41	4.56256e-12	8.2949e-12	224.84	221.13	0.5345	0.03	65-334	0.6458	0.8438	95-209	0.5958	0.969793	0.937216
1073398	A	G	SNP	missense_variant	MODERATE	gAa/gGa	p.Glu283Gly/c.848A>G	torT	EFF=missense_variant(MODERATE|MISSENSE|gAa/gGa|p.Glu283Gly/c.848A>G|342|torT|protein_coding|CODING|ACT38679|1|1),upstream_gene_variant(MODIFIER||976||390|torC|protein_coding|CODING|ACT38681||1),upstream_gene_variant(MODIFIER||3746||357|yccM|protein_coding|CODING|ACT38677||1),upstream_gene_variant(MODIFIER||2148||848|torA|protein_coding|CODING|ACT38682||1),upstream_gene_variant(MODIFIER||930||914|…	2	21	COG1879	G	NO	1072551	1073579	+	G114A-A848G	-447.73	-446.41	4.56256e-12	8.2949e-12	224.84	221.13	0.5345	0.03	65-334	0.6458	0.8438	95-209	0.5958	0.969793	0.937216
1075469	A	G	SNP	missense_variant	MODERATE	Acc/Gcc	p.Thr366Ala/c.1096A>G	torC	EFF=missense_variant(MODERATE|MISSENSE|Acc/Gcc|p.Thr366Ala/c.1096A>G|390|torC|protein_coding|CODING|ACT38681|1|1),upstream_gene_variant(MODIFIER||77||848|torA|protein_coding|CODING|ACT38682||1),upstream_gene_variant(MODIFIER||3001||914|torS|protein_coding|CODING|ACT38678||1|WARNING_TRANSCRIPT_NO_START_CODON),upstream_gene_variant(MODIFIER||2620||199|torD|protein_coding|CODING|ACT38683||1),upstrea…	0	35	COG3005	C	NO	1074374	1075546	+	A1096G	-434.59	-436.77	4.37493e-14	1.21485e-13	380.74	307.63	0.5072	0.0514	920-1104	0.4898	0.8052	1044-1103	0.5371	0.975217	0.953455
1075593	A	G	SNP	synonymous_variant	LOW	gcA/gcG	p.Ala16Ala/c.48A>G	torA	EFF=synonymous_variant(LOW|SILENT|gcA/gcG|p.Ala16Ala/c.48A>G|848|torA|protein_coding|CODING|ACT38682|1|1),upstream_gene_variant(MODIFIER||3125||914|torS|protein_coding|CODING|ACT38678||1|WARNING_TRANSCRIPT_NO_START_CODON),upstream_gene_variant(MODIFIER||2496||199|torD|protein_coding|CODING|ACT38683||1),upstream_gene_variant(MODIFIER||1349||230|torR|protein_coding|CODING|ACT38680||1),upstream_gene…	1	17	COG0243	C	NO	1075546	1078092	+	A48G	-1145.78	-1147.14	4.69013e-25	3.5829e-25	425.36	464.41	0.5847	0.07	38-87	0.394	0.8627	36-85	0.6152	0.989455	0.99068
1094330	A	G	SNP	synonymous_variant	LOW	ggT/ggC	p.Gly279Gly/c.837T>C	putA	EFF=synonymous_variant(LOW|SILENT|ggT/ggC|p.Gly279Gly/c.837T>C|1320|putA|protein_coding|CODING|ACT38699|1|1),upstream_gene_variant(MODIFIER||4035||382|ycdM|protein_coding|CODING|ACT38697||1),upstream_gene_variant(MODIFIER||1259||502|putP|protein_coding|CODING|ACT38700||1),upstream_gene_variant(MODIFIER||3301||279|ycdN|protein_coding|CODING|ACT38701||1|WARNING_TRANSCRIPT_NO_START_CODON),upstream_g…	16	29	COG0506	E	NO	1091204	1095166	-	T837C	-1836.88	-1836.88	2.60535e-37	2.61126e-37	678.47	678.43	0.5461	0	801-850	0.9993	1	796-853	0.9977	1	0.999997
1095512	A	G	SNP	upstream_gene_variant	MODIFIER	.	.	.	EFF=upstream_gene_variant(MODIFIER||77||502|putP|protein_coding|CODING|ACT38700||1),upstream_gene_variant(MODIFIER||2119||279|ycdN|protein_coding|CODING|ACT38701||1|WARNING_TRANSCRIPT_NO_START_CODON),upstream_gene_variant(MODIFIER||3016||375|ycdO|protein_coding|CODING|ACT38702||1),upstream_gene_variant(MODIFIER||4149||423|ycdB|protein_coding|CODING|ACT38703||1),upstream_gene_variant(MODIFIER||346…	.	.	NA	NA	.	.	.	.	.	.	.	.	.	.	.	.	.	.	.	.	.	.	.	.
1097581	A	G	SNP	upstream_gene_variant	MODIFIER	.	.	.	EFF=upstream_gene_variant(MODIFIER||50||279|ycdN|protein_coding|CODING|ACT38701||1|WARNING_TRANSCRIPT_NO_START_CODON),upstream_gene_variant(MODIFIER||947||375|ycdO|protein_coding|CODING|ACT38702||1),upstream_gene_variant(MODIFIER||2080||423|ycdB|protein_coding|CODING|ACT38703||1),upstream_gene_variant(MODIFIER||2415||1320|putA|protein_coding|CODING|ACT38699||1),upstream_gene_variant(MODIFIER||369…	.	.	NA	NA	.	.	.	.	.	.	.	.	.	.	.	.	.	.	.	.	.	.	.	.
1104019	G	A	SNP	missense_variant	MODERATE	cCg/cTg	p.Pro38Leu/c.113C>T	ycdQ	EFF=missense_variant(MODERATE|MISSENSE|cCg/cTg|p.Pro38Leu/c.113C>T|441|ycdQ|protein_coding|CODING|ACT38706|1|1),upstream_gene_variant(MODIFIER||1215||137|ycdP|protein_coding|CODING|ACT38705||1),downstream_gene_variant(MODIFIER||105||672|ycdR|protein_coding|CODING|ACT38707||1),downstream_gene_variant(MODIFIER||4364||375|ycdO|protein_coding|CODING|ACT38702||1),downstream_gene_variant(MODIFIER||3087…	2	31	COG1215	M	NO	1102806	1104131	-	C113T	-476.95	-476.95	4.9677e-15	1.06701e-14	249.63	239.33	0.4409	0.2237	69-312	0.0635	-0.2037	147-228	0.0336	0.948009	0.931524
1107746	A	G	SNP	missense_variant	MODERATE	Tac/Cac	p.Tyr277His/c.829T>C	ycdS	EFF=missense_variant(MODERATE|MISSENSE|Tac/Cac|p.Tyr277His/c.829T>C|807|ycdS|protein_coding|CODING|ACT38708|1|1),upstream_gene_variant(MODIFIER||4942||137|ycdP|protein_coding|CODING|ACT38705||1),upstream_gene_variant(MODIFIER||3615||441|ycdQ|protein_coding|CODING|ACT38706||1),upstream_gene_variant(MODIFIER||1415||452|ycdT|protein_coding|CODING|ACT38709||1),upstream_gene_variant(MODIFIER||1604||67…	6	22	COG0457	R	NO	1106151	1108574	-	G407A-T829C	-863.48	-864.28	2.31854e-23	4.03733e-23	685.58	547.23	0.4727	0.0243	783-832	0.6307	0.9061	780-829	0.674	0.997402	0.981364
1108168	C	T	SNP	missense_variant	MODERATE	cGg/cAg	p.Arg136Gln/c.407G>A	ycdS	EFF=missense_variant(MODERATE|MISSENSE|cGg/cAg|p.Arg136Gln/c.407G>A|807|ycdS|protein_coding|CODING|ACT38708|1|1),upstream_gene_variant(MODIFIER||4037||441|ycdQ|protein_coding|CODING|ACT38706||1),upstream_gene_variant(MODIFIER||993||452|ycdT|protein_coding|CODING|ACT38709||1),upstream_gene_variant(MODIFIER||2026||672|ycdR|protein_coding|CODING|ACT38707||1),upstream_gene_variant(MODIFIER||4287||312…	6	22	COG0457	R	NO	1106151	1108574	-	G407A-T829C	-863.48	-864.28	2.31854e-23	4.03733e-23	685.58	547.23	0.4727	0.0243	783-832	0.6307	0.9061	780-829	0.674	0.997402	0.981364
1111965	GG	G	DEL	upstream_gene_variant	MODIFIER	.	.	.	EFF=upstream_gene_variant(MODIFIER||489||312|ycdW|protein_coding|CODING|ACT38712||1),upstream_gene_variant(MODIFIER||1482||245|ycdX|protein_coding|CODING|ACT38713||1),upstream_gene_variant(MODIFIER||3392||807|ycdS|protein_coding|CODING|ACT38708||1),upstream_gene_variant(MODIFIER||2243||184|ycdY|protein_coding|CODING|ACT38714||1),upstream_gene_variant(MODIFIER||2899||163|ycdZ|protein_coding|CODING…	.	.	NA	NA	.	.	.	.	.	.	.	.	.	.	.	.	.	.	.	.	.	.	.	.
1112148	G	GG	INS	upstream_gene_variant	MODIFIER	.	.	.	EFF=upstream_gene_variant(MODIFIER||306||312|ycdW|protein_coding|CODING|ACT38712||1),upstream_gene_variant(MODIFIER||1299||245|ycdX|protein_coding|CODING|ACT38713||1),upstream_gene_variant(MODIFIER||3575||807|ycdS|protein_coding|CODING|ACT38708||1),upstream_gene_variant(MODIFIER||2060||184|ycdY|protein_coding|CODING|ACT38714||1),upstream_gene_variant(MODIFIER||2716||163|ycdZ|protein_coding|CODING…	.	.	NA	NA	.	.	.	.	.	.	.	.	.	.	.	.	.	.	.	.	.	.	.	.
1119395	A	G	SNP	missense_variant	MODERATE	gAc/gGc	p.Asp127Gly/c.380A>G	csgA	EFF=missense_variant(MODERATE|MISSENSE|gAc/gGc|p.Asp127Gly/c.380A>G|151|csgA|protein_coding|CODING|ACT38721|1|1),upstream_gene_variant(MODIFIER||135||110|csgC|protein_coding|CODING|ACT38722||1),upstream_gene_variant(MODIFIER||588||103|ymdA|protein_coding|CODING|ACT38723||1),upstream_gene_variant(MODIFIER||994||177|ymdB|protein_coding|CODING|ACT38724||1),upstream_gene_variant(MODIFIER||1529||473|y…	2	43	NA	NA	NO	1119016	1119471	+	A380G	-170.02	-169.52	0.000181028	0.00017927	55.5	88.9	0.509	0.0016	189-423	0.9594	0.9928	250-305	0.927	0.999128	0.99424
1138611	A	G	SNP	missense_variant	MODERATE	Tac/Cac	p.Tyr6His/c.16T>C	grxB	EFF=missense_variant(MODERATE|MISSENSE|Tac/Cac|p.Tyr6His/c.16T>C|215|grxB|protein_coding|CODING|ACT38742|1|1|WARNING_TRANSCRIPT_NO_START_CODON),upstream_gene_variant(MODIFIER||4996||188|yceJ|protein_coding|CODING|ACT38735||1),upstream_gene_variant(MODIFIER||4595||46|yceO|protein_coding|CODING|ACT38736||1),upstream_gene_variant(MODIFIER||1523||194|rimJ|protein_coding|CODING|ACT38744||1),upstream_g…	47	178	COG2999	O	NO	1137979	1138626	-	T16C	-225.92	-225.92	1.26443e-08	4.50578e-09	98.22	190.46	0.4676	0.0029	1954-01-01	0.9001	0.9925	1-111	0.9004	0.998755	0.985248
1138681	A	G	SNP	upstream_gene_variant	MODIFIER	.	.	.	EFF=upstream_gene_variant(MODIFIER||4665||46|yceO|protein_coding|CODING|ACT38736||1),upstream_gene_variant(MODIFIER||1453||194|rimJ|protein_coding|CODING|ACT38744||1),upstream_gene_variant(MODIFIER||3526||372|solA|protein_coding|CODING|ACT38737||1),upstream_gene_variant(MODIFIER||3157||84|yceP|protein_coding|CODING|ACT38738||1),upstream_gene_variant(MODIFIER||2048||215|yceH|protein_coding|CODING|…	.	.	NA	NA	.	.	.	.	.	.	.	.	.	.	.	.	.	.	.	.	.	.	.	.
1142186	C	T	SNP	missense_variant	MODERATE	gCg/gTg	p.Ala270Val/c.809C>T	mviM	EFF=missense_variant(MODERATE|MISSENSE|gCg/gTg|p.Ala270Val/c.809C>T|307|mviM|protein_coding|CODING|ACT38746|1|1|WARNING_TRANSCRIPT_NO_START_CODON),upstream_gene_variant(MODIFIER||225||511|mviN|protein_coding|CODING|ACT38747||1),upstream_gene_variant(MODIFIER||4341||186|yceB|protein_coding|CODING|ACT38741||1),upstream_gene_variant(MODIFIER||3560||215|grxB|protein_coding|CODING|ACT38742||1|WARNING_…	22	38	COG0673	R	NO	1141378	1142301	+	C809T	-416.41	-417.98	2.39879e-10	2.06212e-10	225.25	221.91	0.5791	0.1124	791-865	0.259	0.5342	799-856	0.2934	0.992227	0.958283
1148087	A	G	SNP	synonymous_variant	LOW	gtA/gtG	p.Val314Val/c.942A>G	flgE	EFF=synonymous_variant(LOW|SILENT|gtA/gtG|p.Val314Val/c.942A>G|401|flgE|protein_coding|CODING|ACT38754|1|1),upstream_gene_variant(MODIFIER||284||251|flgF|protein_coding|CODING|ACT38755||1),upstream_gene_variant(MODIFIER||1211||260|flgG|protein_coding|CODING|ACT38756||1),upstream_gene_variant(MODIFIER||3685||138|flgN|protein_coding|CODING|ACT38748||1),upstream_gene_variant(MODIFIER||3387||97|flgM|…	8	90	COG1749	N	NO	1147146	1148351	+	A942G	-449.1	-451.7	8.14156e-14	8.6011e-14	263.72	221.36	0.5312	0.0948	920-969	0.3038	0.6124	891-960	0.356	0.979212	0.944511
1155156	C	T	SNP	synonymous_variant	LOW	agC/agT	p.Ser185Ser/c.555C>T	flgL	EFF=synonymous_variant(LOW|SILENT|agC/agT|p.Ser185Ser/c.555C>T|317|flgL|protein_coding|CODING|ACT38761|1|1),upstream_gene_variant(MODIFIER||3915||106|ECB_01081|protein_coding|CODING|ACT38763||1|WARNING_TRANSCRIPT_NO_START_CODON),upstream_gene_variant(MODIFIER||4353||319|rluC|protein_coding|CODING|ACT38764||1),downstream_gene_variant(MODIFIER||595||1061|rne|protein_coding|CODING|ACT38762||1),downs…	5	59	COG1344	N	NO	1154602	1155555	+	C555T	-349.86	-347.72	6.16988e-11	1.31787e-11	298.46	284.22	0.5137	0.0037	500-633	0.9243	0.992	474-617	0.9291	0.919212	0.889261
1158096	G	A	SNP	missense_variant	MODERATE	Cgt/Tgt	p.Arg281Cys/c.841C>T	rne	EFF=missense_variant(MODERATE|MISSENSE|Cgt/Tgt|p.Arg281Cys/c.841C>T|1061|rne|protein_coding|CODING|ACT38762|1|1),upstream_gene_variant(MODIFIER||975||106|ECB_01081|protein_coding|CODING|ACT38763||1|WARNING_TRANSCRIPT_NO_START_CODON),upstream_gene_variant(MODIFIER||1413||319|rluC|protein_coding|CODING|ACT38764||1),upstream_gene_variant(MODIFIER||3267||173|yceD|protein_coding|CODING|ACT38766||1),up…	4	42	COG1530	J	YES	1155751	1158936	-	C841T	-1353.61	-1351.51	9.94331e-28	6.84673e-28	495.29	500.56	0.5561	0.0171	809-858	0.7527	0.9715	810-860	0.8491	0.999274	0.997793
1159940	C	T	SNP	synonymous_variant	LOW	gaC/gaT	p.Asp144Asp/c.432C>T	rluC	EFF=synonymous_variant(LOW|SILENT|gaC/gaT|p.Asp144Asp/c.432C>T|319|rluC|protein_coding|CODING|ACT38764|1|1),upstream_gene_variant(MODIFIER||1423||173|yceD|protein_coding|CODING|ACT38766||1),upstream_gene_variant(MODIFIER||1996||57|rpmF|protein_coding|CODING|ACT38767||1),upstream_gene_variant(MODIFIER||2250||356|plsX|protein_coding|CODING|ACT38768||1),upstream_gene_variant(MODIFIER||3388||317|fabH…	260	62	COG0564	J	NO	1159509	1160468	+	C432T	-402.72	-400.91	8.90782e-12	1.08058e-11	230.24	192.32	0.5337	0.0005	429-548	0.9865	0.9989	425-553	0.9788	0.968145	0.905779
1162586	G	A	SNP	missense_variant	MODERATE	Gta/Ata	p.Val133Ile/c.397G>A	plsX	EFF=missense_variant(MODERATE|MISSENSE|Gta/Ata|p.Val133Ile/c.397G>A|356|plsX|protein_coding|CODING|ACT38768|1|1),upstream_gene_variant(MODIFIER||742||317|fabH|protein_coding|CODING|ACT38769||1),upstream_gene_variant(MODIFIER||3650||1061|rne|protein_coding|CODING|ACT38762||1),upstream_gene_variant(MODIFIER||1711||309|fabD|protein_coding|CODING|ACT38770||1),upstream_gene_variant(MODIFIER||2653||244…	321	115	COG0416	I	NO	1162190	1163260	+	G397A	-468.24	-464.82	1.69256e-11	1.065e-11	222.19	222.39	0.5461	0.0547	371-420	0.4714	0.8373	355-405	0.588	0.98722	0.995352
1165325	C	T	SNP	synonymous_variant	LOW	ggC/ggT	p.Gly29Gly/c.87C>T	fabG	EFF=synonymous_variant(LOW|SILENT|ggC/ggT|p.Gly29Gly/c.87C>T|244|fabG|protein_coding|CODING|ACT38771|1|1),upstream_gene_variant(MODIFIER||4161||194|yceF|protein_coding|CODING|ACT38765||1),upstream_gene_variant(MODIFIER||859||78|acpP|protein_coding|CODING|ACT38772||1),upstream_gene_variant(MODIFIER||1183||413|fabF|protein_coding|CODING|ACT38773||1|WARNING_TRANSCRIPT_NO_START_CODON),upstream_gene_v…	4364	932	COG1028	IQR	YES	1165239	1165973	+	C87T-A162G	-318.28	-319.18	3.43988e-08	4.65886e-08	103.27	86	0.4724	0.1411	75-125	0.1609	0.3225	82-131	0.1684	0.968002	0.971855
1165400	A	G	SNP	synonymous_variant	LOW	aaA/aaG	p.Lys54Lys/c.162A>G	fabG	EFF=synonymous_variant(LOW|SILENT|aaA/aaG|p.Lys54Lys/c.162A>G|244|fabG|protein_coding|CODING|ACT38771|1|1),upstream_gene_variant(MODIFIER||4236||194|yceF|protein_coding|CODING|ACT38765||1),upstream_gene_variant(MODIFIER||784||78|acpP|protein_coding|CODING|ACT38772||1),upstream_gene_variant(MODIFIER||1108||413|fabF|protein_coding|CODING|ACT38773||1|WARNING_TRANSCRIPT_NO_START_CODON),upstream_gene_…	4364	932	COG1028	IQR	YES	1165239	1165973	+	C87T-A162G	-318.28	-319.18	3.43988e-08	4.65886e-08	103.27	86	0.4724	0.1411	75-125	0.1609	0.3225	82-131	0.1684	0.968002	0.971855
1166061	G	GG	INS	upstream_gene_variant	MODIFIER	.	.	.	EFF=upstream_gene_variant(MODIFIER||4898||194|yceF|protein_coding|CODING|ACT38765||1),upstream_gene_variant(MODIFIER||122||78|acpP|protein_coding|CODING|ACT38772||1),upstream_gene_variant(MODIFIER||446||413|fabF|protein_coding|CODING|ACT38773||1|WARNING_TRANSCRIPT_NO_START_CODON),upstream_gene_variant(MODIFIER||1807||269|pabC|protein_coding|CODING|ACT38774||1),upstream_gene_variant(MODIFIER||2619…	.	.	NA	NA	.	.	.	.	.	.	.	.	.	.	.	.	.	.	.	.	.	.	.	.
1197986	A	G	SNP	missense_variant	MODERATE	Tac/Cac	p.Tyr72His/c.214T>C	potD	EFF=missense_variant(MODERATE|MISSENSE|Tac/Cac|p.Tyr72His/c.214T>C|348|potD|protein_coding|CODING|ACT38802|1|1),upstream_gene_variant(MODIFIER||3228||408|pepT|protein_coding|CODING|ACT38806||1),upstream_gene_variant(MODIFIER||1348||262|ycfZ|protein_coding|CODING|ACT38800||1),upstream_gene_variant(MODIFIER||891||135|ymfA|protein_coding|CODING|ACT38801||1),downstream_gene_variant(MODIFIER||4827||41…	384	242	COG0687	E	NO	1197153	1198199	-	T214C	-390.21	-392.35	1.1559e-10	3.5436e-10	166.71	144.33	0.4988	0.0408	151-227	0.4925	0.8711	164-226	0.6111	0.986077	0.942009
1205588	A	G	SNP	missense_variant	MODERATE	gTa/gCa	p.Val77Ala/c.230T>C	phoP	EFF=missense_variant(MODERATE|MISSENSE|gTa/gCa|p.Val77Ala/c.230T>C|223|phoP|protein_coding|CODING|ACT38809|1|1),upstream_gene_variant(MODIFIER||4624||378|potA|protein_coding|CODING|ACT38805||1),upstream_gene_variant(MODIFIER||1978||373|ycfD|protein_coding|CODING|ACT38807||1),upstream_gene_variant(MODIFIER||442||486|phoQ|protein_coding|CODING|ACT38808||1),upstream_gene_variant(MODIFIER||4904||416|…	119	165	COG0745	TK	NO	1205146	1205817	-	T230C	-224.56	-226.78	1.4003e-08	6.21529e-08	223.01	206.69	0.4788	0.0773	30-425	0.3005	0.3935	160-349	0.1861	0.992314	0.981048
1208610	A	G	SNP	missense_variant	MODERATE	gTg/gCg	p.Val178Ala/c.533T>C	trmU	EFF=missense_variant(MODERATE|MISSENSE|gTg/gCg|p.Val178Ala/c.533T>C|368|trmU|protein_coding|CODING|ACT38812|1|1),upstream_gene_variant(MODIFIER||5000||373|ycfD|protein_coding|CODING|ACT38807||1),upstream_gene_variant(MODIFIER||3464||486|phoQ|protein_coding|CODING|ACT38808||1),upstream_gene_variant(MODIFIER||1882||416|icdA|protein_coding|CODING|ACT38815||1),upstream_gene_variant(MODIFIER||2793||22…	383	142	COG0482	J	NO	1208036	1209142	-	T533C	-446.08	-447.41	1.3326e-12	5.43244e-13	265.18	182.39	0.5337	0.0107	393-562	0.8253	0.9476	470-539	0.7838	0.978502	0.960984
1217055	G	A	SNP	synonymous_variant	LOW	gtG/gtA	p.Val49Val/c.147G>A	ymgC	EFF=synonymous_variant(LOW|SILENT|gtG/gtA|p.Val49Val/c.147G>A|82|ymgC|protein_coding|CODING|ACT38823|1|1),upstream_gene_variant(MODIFIER||4887||107|ycgW|protein_coding|CODING|ACT38816||1),upstream_gene_variant(MODIFIER||434||507|ycgG|protein_coding|CODING|ACT38824||1),upstream_gene_variant(MODIFIER||3787||134|ycgX|protein_coding|CODING|ACT38817||1),upstream_gene_variant(MODIFIER||2089||72|ymgF|pr…	7	29	NA	NA	NO	1216909	1217157	+	G147A	-69.52	-69.83	0.0014549	0.0018081	53.68	41.57	0.3574	0.0022	106-160	0.9458	0.9924	120-239	0.9352	0.994129	0.992506
1218578	C	T	SNP	missense_variant	MODERATE	Cgc/Tgc	p.Arg364Cys/c.1090C>T	ycgG	EFF=missense_variant(MODERATE|MISSENSE|Cgc/Tgc|p.Arg364Cys/c.1090C>T|507|ycgG|protein_coding|CODING|ACT38824|1|1),upstream_gene_variant(MODIFIER||566||72|ymgF|protein_coding|CODING|ACT38825||1),upstream_gene_variant(MODIFIER||4358||243|ycgE|protein_coding|CODING|ACT38818||1|WARNING_TRANSCRIPT_NO_START_CODON),upstream_gene_variant(MODIFIER||2942||403|ycgF|protein_coding|CODING|ACT38819||1),downstr…	1	24	COG2200	T	NO	1217489	1219012	+	C1090T	-516.05	-519.67	1.06162e-17	1.85702e-17	272.38	236.55	0.4339	0.1067	1059-1108	0.2078	0.7194	1059-1108	0.4164	0.985129	0.890282
1231530	T	C	SNP	synonymous_variant	LOW	tgT/tgC	p.Cys65Cys/c.195T>C	umuC	EFF=synonymous_variant(LOW|SILENT|tgT/tgC|p.Cys65Cys/c.195T>C|422|umuC|protein_coding|CODING|ACT38838|1|1),upstream_gene_variant(MODIFIER||3897||133|ycgK|protein_coding|CODING|ACT38833||1),upstream_gene_variant(MODIFIER||3558||239|fadR|protein_coding|CODING|ACT38841||1),downstream_gene_variant(MODIFIER||4401||122|ycgJ|protein_coding|CODING|ACT38832||1),downstream_gene_variant(MODIFIER||1120||176|…	3	41	COG0389	L	NO	1231336	1232604	+	T195C	-515.89	-514.99	2.21216e-14	1.68176e-14	274.84	300.9	0.4937	0.0513	189-238	0.4388	0.698	187-251	0.4048	0.995401	0.980995
1247830	C	T	SNP	upstream_gene_variant	MODIFIER	.	.	.	EFF=upstream_gene_variant(MODIFIER||4600||304|ldcA|protein_coding|CODING|ACT38846||1),upstream_gene_variant(MODIFIER||3153||244|ycgR|protein_coding|CODING|ACT38848||1|WARNING_TRANSCRIPT_NO_START_CODON),upstream_gene_variant(MODIFIER||3386||639|dhaR|protein_coding|CODING|ACT38855||1),upstream_gene_variant(MODIFIER||304||565|treA|protein_coding|CODING|ACT38851||1),downstream_gene_variant(MODIFIER||…	.	.	NA	NA	.	.	.	.	.	.	.	.	.	.	.	.	.	.	.	.	.	.	.	.
1251185	G	A	SNP	upstream_gene_variant	MODIFIER	.	.	.	EFF=upstream_gene_variant(MODIFIER||31||639|dhaR|protein_coding|CODING|ACT38855||1),upstream_gene_variant(MODIFIER||3659||565|treA|protein_coding|CODING|ACT38851||1),upstream_gene_variant(MODIFIER||1921||472|dhaM|protein_coding|CODING|ACT38852||1),upstream_gene_variant(MODIFIER||1278||210|dhaL|protein_coding|CODING|ACT38853||1),upstream_gene_variant(MODIFIER||197||356|dhaK|protein_coding|CODING|A…	.	.	NA	NA	.	.	.	.	.	.	.	.	.	.	.	.	.	.	.	.	.	.	.	.
1252289	C	T	SNP	synonymous_variant	LOW	ggC/ggT	p.Gly358Gly/c.1074C>T	dhaR	EFF=synonymous_variant(LOW|SILENT|ggC/ggT|p.Gly358Gly/c.1074C>T|639|dhaR|protein_coding|CODING|ACT38855|1|1),upstream_gene_variant(MODIFIER||4763||565|treA|protein_coding|CODING|ACT38851||1),upstream_gene_variant(MODIFIER||3025||472|dhaM|protein_coding|CODING|ACT38852||1),upstream_gene_variant(MODIFIER||2382||210|dhaL|protein_coding|CODING|ACT38853||1),upstream_gene_variant(MODIFIER||1301||356|dh…	16	24	COG3284	QK	NO	1251216	1253135	+	C1074T	-777.01	-774.56	3.71377e-21	2.90028e-21	407.63	407.9	0.5187	0.0519	1039-1088	0.4873	0.8617	1037-1090	0.6234	0.994692	0.969847
1253297	A	G	SNP	missense_variant	MODERATE	Tac/Cac	p.Tyr936His/c.2806T>C	ycgV	EFF=missense_variant(MODERATE|MISSENSE|Tac/Cac|p.Tyr936His/c.2806T>C|955|ycgV|protein_coding|CODING|ACT38856|1|1),upstream_gene_variant(MODIFIER||4033||472|dhaM|protein_coding|CODING|ACT38852||1),upstream_gene_variant(MODIFIER||3390||210|dhaL|protein_coding|CODING|ACT38853||1),upstream_gene_variant(MODIFIER||2309||356|dhaK|protein_coding|CODING|ACT38854||1),downstream_gene_variant(MODIFIER||3574|…	3	24	COG3468	MU	NO	1253235	1256102	-	T2806C	-1086.23	-1085.83	3.29123e-29	5.26468e-29	720.45	709.68	0.4791	0.0971	2788-2854	0.2748	0.4787	2788-2840	0.2583	0.996935	0.995572
1270124	AC	ACCCGGCCGGTGTACTGACCCCAAAAAGTTGGACAGTTAAACACGAGGCATATAGGTCTGATTCCGATATTCAATTGGAGTCAGACCTTTTAATTTCAGGCTAATTCTTCTGCTGTTGTAGTATTCAATATATTCCGTAACAGCATCCTTCAGTTCGCTTATATTACTGAACTCATCAAGATAAAAACACTCCGACTTTAAGGTTCCAAAGAAACACTCCACCACAGCATTATCCAGACAATTGCCTTTTCTGGACATGCTTTGTTTAATACCATGTTCTTTAAGGATATTTTGATATCTTCTCATACGATACTGCCATCCCTGGTCAGAGTGCAGAACAGGATGCTCGTGAGGATTAAGCTTTTTGAATGCCTGATCGAGCATATTCTCAACCATGTT…	INS	upstream_gene_variant	MODIFIER	.	.	.	EFF=upstream_gene_variant(MODIFIER||2142||76|chaB|protein_coding|CODING|ACT38874||1),upstream_gene_variant(MODIFIER||2509||238|chaC|protein_coding|CODING|ACT38875||1),upstream_gene_variant(MODIFIER||3949||417|ychP|protein_coding|CODING|ACT38877||1),upstream_gene_variant(MODIFIER||703||35|ldrA|protein_coding|CODING|ACT38870||1),upstream_gene_variant(MODIFIER||168||35|ldrB|protein_coding|CODING|ACT…	.	.	NA	NA	.	.	.	.	.	.	.	.	.	.	.	.	.	.	.	.	.	.	.	.
1275602	G	A	SNP	synonymous_variant	LOW	ggC/ggT	p.Gly126Gly/c.378C>T	narL	EFF=synonymous_variant(LOW|SILENT|ggC/ggT|p.Gly126Gly/c.378C>T|216|narL|protein_coding|CODING|ACT38878|1|1),upstream_gene_variant(MODIFIER||3604||366|chaA|protein_coding|CODING|ACT38873||1),upstream_gene_variant(MODIFIER||2505||463|narK|protein_coding|CODING|ACT38880||1),upstream_gene_variant(MODIFIER||1854||117|ychN|protein_coding|CODING|ACT38876||1),upstream_gene_variant(MODIFIER||4412||1247|na…	158	166	COG2197	TK	NO	1275329	1275979	-	T263C-C378T	-251.64	-249.31	2.06572e-07	2.11454e-07	120.77	120.99	0.5194	0.1183	347-396	0.238	0.0681	350-402	0.095	0.943138	0.958717
1275717	A	G	SNP	missense_variant	MODERATE	gTc/gCc	p.Val88Ala/c.263T>C	narL	EFF=missense_variant(MODERATE|MISSENSE|gTc/gCc|p.Val88Ala/c.263T>C|216|narL|protein_coding|CODING|ACT38878|1|1),upstream_gene_variant(MODIFIER||3719||366|chaA|protein_coding|CODING|ACT38873||1),upstream_gene_variant(MODIFIER||2390||463|narK|protein_coding|CODING|ACT38880||1),upstream_gene_variant(MODIFIER||1969||117|ychN|protein_coding|CODING|ACT38876||1),upstream_gene_variant(MODIFIER||4297||124…	158	166	COG2197	TK	NO	1275329	1275979	-	T263C-C378T	-251.64	-249.31	2.06572e-07	2.11454e-07	120.77	120.99	0.5194	0.1183	347-396	0.238	0.0681	350-402	0.095	0.943138	0.958717
1280949	C	T	SNP	synonymous_variant	LOW	caC/caT	p.His312His/c.936C>T	narG	EFF=synonymous_variant(LOW|SILENT|caC/caT|p.His312His/c.936C>T|1247|narG|protein_coding|CODING|ACT38881|1|1),upstream_gene_variant(MODIFIER||4970||216|narL|protein_coding|CODING|ACT38878||1),upstream_gene_variant(MODIFIER||3181||598|narX|protein_coding|CODING|ACT38879||1),upstream_gene_variant(MODIFIER||2805||512|narH|protein_coding|CODING|ACT38882||1),upstream_gene_variant(MODIFIER||4340||236|na…	0	14	COG5013	C	NO	1280014	1283757	+	C936T-A2311G	-1622.9	-1621.27	1.03571e-38	8.704e-39	580.16	601.04	0.5535	0.0306	2288-2337	0.6304	0.7248	2291-2340	0.4557	0.982257
1282324	A	G	SNP	missense_variant	MODERATE	Acg/Gcg	p.Thr771Ala/c.2311A>G	narG	EFF=missense_variant(MODERATE|MISSENSE|Acg/Gcg|p.Thr771Ala/c.2311A>G|1247|narG|protein_coding|CODING|ACT38881|1|1),upstream_gene_variant(MODIFIER||4556||598|narX|protein_coding|CODING|ACT38879||1),upstream_gene_variant(MODIFIER||1430||512|narH|protein_coding|CODING|ACT38882||1),upstream_gene_variant(MODIFIER||2965||236|narJ|protein_coding|CODING|ACT38883||1),upstream_gene_variant(MODIFIER||3675||…	0	14	COG5013	C	NO	1280014	1283757	+	C936T-A2311G	-1622.9	-1621.27	1.03571e-38	8.704e-39	580.16	601.04	0.5535	0.0306	2288-2337	0.6304	0.7248	2291-2340	0.4557	0.982257
1284959	A	G	SNP	synonymous_variant	LOW	gtA/gtG	p.Val402Val/c.1206A>G	narH	EFF=synonymous_variant(LOW|SILENT|gtA/gtG|p.Val402Val/c.1206A>G|512|narH|protein_coding|CODING|ACT38882|1|1),upstream_gene_variant(MODIFIER||330||236|narJ|protein_coding|CODING|ACT38883||1),upstream_gene_variant(MODIFIER||1040||225|narI|protein_coding|CODING|ACT38884||1),upstream_gene_variant(MODIFIER||4041||314|ychK|protein_coding|CODING|ACT38887||1|WARNING_TRANSCRIPT_NO_START_CODON),downstream_…	1	12	COG1140	C	NO	1283754	1285292	+	A1206G	-647.08	-648.85	5.54599e-16	1.47406e-15	228.21	329.06	0.5611	0.1	1131-1236	0.2876	0.4723	1149-1220	0.2608	0.971517	0.944388
1301056	T	C	SNP	synonymous_variant	LOW	agT/agC	p.Ser188Ser/c.564T>C	oppB	EFF=synonymous_variant(LOW|SILENT|agT/agC|p.Ser188Ser/c.564T>C|306|oppB|protein_coding|CODING|ACT38895|1|1),upstream_gene_variant(MODIFIER||372||302|oppC|protein_coding|CODING|ACT38896||1),upstream_gene_variant(MODIFIER||4142||891|adhE|protein_coding|CODING|ACT38892||1),upstream_gene_variant(MODIFIER||1292||337|oppD|protein_coding|CODING|ACT38897||1),upstream_gene_variant(MODIFIER||2302||334|oppF…	335	86	COG0601	EP	NO	1300493	1301413	+	T564C	-330.02	-331.06	1.00111e-11	1.48637e-11	158.88	210.06	0.4738	0.0075	522-576	0.8408	0.9898	521-577	0.9109	0.998987	0.985535
1311847	A	G	SNP	synonymous_variant	LOW	gcA/gcG	p.Ala78Ala/c.234A>G	yciD	EFF=synonymous_variant(LOW|SILENT|gcA/gcG|p.Ala78Ala/c.234A>G|212|yciD|protein_coding|CODING|ACT38907|1|1),upstream_gene_variant(MODIFIER||3984||417|kch|protein_coding|CODING|ACT38901||1|WARNING_TRANSCRIPT_NO_START_CODON),upstream_gene_variant(MODIFIER||3388||98|yciI|protein_coding|CODING|ACT38902||1|WARNING_TRANSCRIPT_NO_START_CODON),upstream_gene_variant(MODIFIER||2007||132|yciA|protein_coding|…	1	20	COG3047	M	NO	1311614	1312252	+	A234G	-241.07	-243.71	1.16458e-08	1.20983e-08	111.2	125.23	0.5087	0.0194	217-266	0.73	0.8945	205-254	0.6765	0.989019	0.994917
1319304	C	T	SNP	missense_variant	MODERATE	Gcc/Acc	p.Ala413Thr/c.1237G>A	trpE	EFF=missense_variant(MODERATE|MISSENSE|Gcc/Acc|p.Ala413Thr/c.1237G>A|520|trpE|protein_coding|CODING|ACT38915|1|1),upstream_gene_variant(MODIFIER||4488||268|trpA|protein_coding|CODING|ACT38911||1),upstream_gene_variant(MODIFIER||1510||293|yciV|protein_coding|CODING|ACT38917||1),upstream_gene_variant(MODIFIER||3295||397|trpB|protein_coding|CODING|ACT38912||1),upstream_gene_variant(MODIFIER||2388||2…	4	204	COG0147	EH	NO	1318978	1320540	-	G1237A	-632.61	-629.84	5.1458e-16	4.64065e-16	264.32	263.38	0.5736	0.0568	1221-1281	0.4605	0.7958	1220-1273	0.5342	0.975812	0.899715
1323909	T	C	SNP	upstream_gene_variant	MODIFIER	.	.	.	EFF=upstream_gene_variant(MODIFIER||4931||531|trpD|protein_coding|CODING|ACT38914||1),upstream_gene_variant(MODIFIER||1315||291|yciL|protein_coding|CODING|ACT38921||1),upstream_gene_variant(MODIFIER||3369||520|trpE|protein_coding|CODING|ACT38915||1),upstream_gene_variant(MODIFIER||3233||14|trpL|protein_coding|CODING|ACT38916||1),upstream_gene_variant(MODIFIER||3795||349|sohB|protein_coding|CODING…	.	.	NA	NA	.	.	.	.	.	.	.	.	.	.	.	.	.	.	.	.	.	.	.	.
1332147	TT	T	DEL	upstream_gene_variant	MODIFIER	.	.	.	EFF=upstream_gene_variant(MODIFIER||79||324|cysB|protein_coding|CODING|ACT38927||1),upstream_gene_variant(MODIFIER||4664||252|yciK|protein_coding|CODING|ACT38923||1),upstream_gene_variant(MODIFIER||3108||83|yciN|protein_coding|CODING|ACT38925||1),upstream_gene_variant(MODIFIER||2055||891|acnA|protein_coding|CODING|ACT38928||1),downstream_gene_variant(MODIFIER||3395||349|sohB|protein_coding|CODING…	.	.	NA	NA	.	.	.	.	.	.	.	.	.	.	.	.	.	.	.	.	.	.	.	.
1349565	G	GGG	INS	upstream_gene_variant	MODIFIER	.	.	.	EFF=upstream_gene_variant(MODIFIER||4454||661|yciR|protein_coding|CODING|ACT38937||1),upstream_gene_variant(MODIFIER||2285||644|rnb|protein_coding|CODING|ACT38938||1),upstream_gene_variant(MODIFIER||1090||375|yciW|protein_coding|CODING|ACT38939||1),upstream_gene_variant(MODIFIER||158||262|fabI|protein_coding|CODING|ACT38940||1),downstream_gene_variant(MODIFIER||210||117|ycjD|protein_coding|CODING…	.	.	NA	NA	.	.	.	.	.	.	.	.	.	.	.	.	.	.	.	.	.	.	.	.
1352809	C	T	SNP	missense_variant	MODERATE	Gcc/Acc	p.Ala27Thr/c.79G>A	sapC	EFF=missense_variant(MODERATE|MISSENSE|Gcc/Acc|p.Ala27Thr/c.79G>A|296|sapC|protein_coding|CODING|ACT38944|1|1),upstream_gene_variant(MODIFIER||4333||375|yciW|protein_coding|CODING|ACT38939||1),upstream_gene_variant(MODIFIER||3401||262|fabI|protein_coding|CODING|ACT38940||1),upstream_gene_variant(MODIFIER||2680||117|ycjD|protein_coding|CODING|ACT38941||1|WARNING_TRANSCRIPT_NO_START_CODON),upstream…	44	37	COG4171	V	NO	1351997	1352887	-	G79A	-408.16	-402.87	5.69035e-09	2.35923e-09	108.59	351.94	0.5627	0.0911	70-123	0.3244	0.7497	71-122	0.48	0.938174	0.770971
1354462	C	T	SNP	missense_variant	MODERATE	Gcc/Acc	p.Ala340Thr/c.1018G>A	sapA	EFF=missense_variant(MODERATE|MISSENSE|Gcc/Acc|p.Ala340Thr/c.1018G>A|547|sapA|protein_coding|CODING|ACT38946|1|1),upstream_gene_variant(MODIFIER||4333||117|ycjD|protein_coding|CODING|ACT38941||1|WARNING_TRANSCRIPT_NO_START_CODON),upstream_gene_variant(MODIFIER||3459||268|sapF|protein_coding|CODING|ACT38942||1),upstream_gene_variant(MODIFIER||2465||330|sapD|protein_coding|CODING|ACT38943||1),upstr…	58	40	COG4166	E	NO	1353836	1355479	-	G1018A	-676.06	-673.85	5.37358e-17	1.7607e-17	290.65	273.19	0.5486	0.1697	827-1113	0.1435	0.1358	882-1027	0.1145	0.984003	0.858811
1357637	G	GG	INS	upstream_gene_variant	MODIFIER	.	.	.	EFF=upstream_gene_variant(MODIFIER||4751||296|sapC|protein_coding|CODING|ACT38944||1),upstream_gene_variant(MODIFIER||3799||321|sapB|protein_coding|CODING|ACT38945||1),upstream_gene_variant(MODIFIER||1850||254|ycjL|protein_coding|CODING|ACT38950||1),upstream_gene_variant(MODIFIER||2641||185|ycjC|protein_coding|CODING|ACT38951||1),upstream_gene_variant(MODIFIER||2159||547|sapA|protein_coding|CODIN…	.	.	NA	NA	.	.	.	.	.	.	.	.	.	.	.	.	.	.	.	.	.	.	.	.
1359810	T	C	SNP	missense_variant	MODERATE	aTc/aCc	p.Ile108Thr/c.323T>C	ycjL	EFF=missense_variant(MODERATE|MISSENSE|aTc/aCc|p.Ile108Thr/c.323T>C|254|ycjL|protein_coding|CODING|ACT38950|1|1),upstream_gene_variant(MODIFIER||469||185|ycjC|protein_coding|CODING|ACT38951||1),upstream_gene_variant(MODIFIER||4331||547|sapA|protein_coding|CODING|ACT38946||1),upstream_gene_variant(MODIFIER||3774||81|ymjA|protein_coding|CODING|ACT38947||1),upstream_gene_variant(MODIFIER||1301||495|…	8	62	COG2071	R	NO	1359488	1360252	+	T323C	-314.45	-312.53	2.5358e-07	2.19082e-07	218.26	139.37	0.5362	0.2656	229-338	0.0592	0.226	241-368	0.145	0.79749	0.653598
1362825	T	C	SNP	missense_variant	MODERATE	Tcc/Ccc	p.Ser76Pro/c.226T>C	ordL	EFF=missense_variant(MODERATE|MISSENSE|Tcc/Ccc|p.Ser76Pro/c.226T>C|426|ordL|protein_coding|CODING|ACT38953|1|1),upstream_gene_variant(MODIFIER||1093||421|goaG|protein_coding|CODING|ACT38954||1),upstream_gene_variant(MODIFIER||3549||472|ycjK|protein_coding|CODING|ACT38949||1),upstream_gene_variant(MODIFIER||3622||222|pspA|protein_coding|CODING|ACT38956||1),upstream_gene_variant(MODIFIER||4344||74|…	0	36	COG0665	E	NO	1362600	1363880	+	T226C	-576.64	-576.06	5.39146e-13	2.41001e-13	318.01	296.93	0.5761	0.0092	205-254	0.8452	0.9307	205-254	0.7457	0.991102	0.988821
1368411	TT	T	DEL	upstream_gene_variant	MODIFIER	.	.	.	EFF=upstream_gene_variant(MODIFIER||172||559|ycjM|protein_coding|CODING|ACT38961||1),upstream_gene_variant(MODIFIER||1865||430|ycjN|protein_coding|CODING|ACT38962||1),upstream_gene_variant(MODIFIER||2132||325|pspF|protein_coding|CODING|ACT38955||1),upstream_gene_variant(MODIFIER||3178||293|ycjO|protein_coding|CODING|ACT38963||1),upstream_gene_variant(MODIFIER||4046||280|ycjP|protein_coding|CODING…	.	.	NA	NA	.	.	.	.	.	.	.	.	.	.	.	.	.	.	.	.	.	.	.	.
1379004	G	A	SNP	synonymous_variant	LOW	ccG/ccA	p.Pro163Pro/c.489G>A	ycjU	EFF=synonymous_variant(LOW|SILENT|ccG/ccA|p.Pro163Pro/c.489G>A|219|ycjU|protein_coding|CODING|ACT38969|1|1),upstream_gene_variant(MODIFIER||185||360|ycjV|protein_coding|CODING|ACT38970||1),upstream_gene_variant(MODIFIER||1312||301|ompG|protein_coding|CODING|ACT38971||1),upstream_gene_variant(MODIFIER||3482||465|ycjX|protein_coding|CODING|ACT38973||1),upstream_gene_variant(MODIFIER||4876||353|ycjF…	0	23	COG0637	R	NO	1378516	1379175	+	G489A	-294.22	-293.26	3.21395e-07	3.20767e-07	104.73	104.72	0.5941	0	470-519	1	1	470-643	0.9997	1	0.999994
1392293	A	G	SNP	missense_variant	MODERATE	gAt/gGt	p.Asp233Gly/c.698A>G	mppA	EFF=missense_variant(MODERATE|MISSENSE|gAt/gGt|p.Asp233Gly/c.698A>G|537|mppA|protein_coding|CODING|ACT38981|1|1),upstream_gene_variant(MODIFIER||3266||262|ycjI|protein_coding|CODING|ACT38978||1),upstream_gene_variant(MODIFIER||2242||85|ynaJ|protein_coding|CODING|ACT38983||1),upstream_gene_variant(MODIFIER||2059||310|ycjY|protein_coding|CODING|ACT38979||1),downstream_gene_variant(MODIFIER||967||34…	74	87	COG4166	E	NO	1391596	1393209	+	A698G-C908T	-596.22	-597.47	1.83677e-16	1.7347e-16	385.88	393.82	0.4812	0.2045	861-914	0.0676	0.3122	861-914	0.1502	0.968699	0.897441
1392503	C	T	SNP	missense_variant	MODERATE	cCg/cTg	p.Pro303Leu/c.908C>T	mppA	EFF=missense_variant(MODERATE|MISSENSE|cCg/cTg|p.Pro303Leu/c.908C>T|537|mppA|protein_coding|CODING|ACT38981|1|1),upstream_gene_variant(MODIFIER||3476||262|ycjI|protein_coding|CODING|ACT38978||1),upstream_gene_variant(MODIFIER||2032||85|ynaJ|protein_coding|CODING|ACT38983||1),upstream_gene_variant(MODIFIER||2269||310|ycjY|protein_coding|CODING|ACT38979||1),downstream_gene_variant(MODIFIER||757||34…	74	87	COG4166	E	NO	1391596	1393209	+	A698G-C908T	-596.22	-597.47	1.83677e-16	1.7347e-16	385.88	393.82	0.4812	0.2045	861-914	0.0676	0.3122	861-914	0.1502	0.968699	0.897441
1398178	C	T	SNP	missense_variant	MODERATE	Gaa/Aaa	p.Glu256Lys/c.766G>A	abgT	EFF=missense_variant(MODERATE|MISSENSE|Gaa/Aaa|p.Glu256Lys/c.766G>A|508|abgT|protein_coding|CODING|ACT38987|1|1),upstream_gene_variant(MODIFIER||3887||343|ynaI|protein_coding|CODING|ACT38982||1),upstream_gene_variant(MODIFIER||2386||316|ydaA|protein_coding|CODING|ACT38984||1),upstream_gene_variant(MODIFIER||1482||250|fnr|protein_coding|CODING|ACT38985||1),upstream_gene_variant(MODIFIER||3733||302…	3	43	COG2978	H	NO	1397417	1398943	-	G766A	-584.97	-585.21	3.83772e-18	3.8314e-18	293.35	293.12	0.4838	0.0006	750-799	0.9783	0.9988	756-805	0.9748	0.99956	0.99717
1412432	A	G	SNP	missense_variant	MODERATE	Tat/Cat	p.Tyr709His/c.2125T>C	recE	EFF=missense_variant(MODERATE|MISSENSE|Tat/Cat|p.Tyr709His/c.2125T>C|866|recE|protein_coding|CODING|ACT39001|1|1),upstream_gene_variant(MODIFIER||3314||311|ydaO|protein_coding|CODING|ACT38995||1),upstream_gene_variant(MODIFIER||2027||411|intR|protein_coding|CODING|ACT38996||1),upstream_gene_variant(MODIFIER||1810||71|xisR|protein_coding|CODING|ACT38997||1),upstream_gene_variant(MODIFIER||3409||16…	2	39	NA	NA	NO	1411956	1414556	-	T2125C	-908.99	-910.45	4.38379e-28	2.46275e-27	372.5	415.55	0.4638	0.0371	2110-2159	0.5195	0.9328	2097-2154	0.7304	0.992541	0.983289
1423100	G	A	SNP	missense_variant	MODERATE	tGc/tAc	p.Cys482Tyr/c.1445G>A	ECB_01342	EFF=missense_variant(MODERATE|MISSENSE|tGc/tAc|p.Cys482Tyr/c.1445G>A|741|ECB_01342|protein_coding|CODING|ACT39016|1|1),upstream_gene_variant(MODIFIER||778||92|ECB_01343|protein_coding|CODING|ACT39017||1),upstream_gene_variant(MODIFIER||1069||97|ECB_01344|protein_coding|CODING|ACT39018||1),downstream_gene_variant(MODIFIER||4576||99|rzpR|protein_coding|CODING|ACT39012||1),downstream_gene_variant(MO…	NA	NA	NA	NA	NO	1421656	1423881	+	G1445A	-816.79	-816.54	1.81067e-23	2.18159e-23	462.59	454.64	0.4539	0.0054	1315-1447	0.8758	0.9427	1316-1446	0.7538	0.973578	0.955952
1428141	T	C	SNP	missense_variant	MODERATE	tAc/tGc	p.Tyr120Cys/c.359A>G	ompN	EFF=missense_variant(MODERATE|MISSENSE|tAc/tGc|p.Tyr120Cys/c.359A>G|377|ompN|protein_coding|CODING|ACT39022|1|1),upstream_gene_variant(MODIFIER||2861||196|pinR|protein_coding|CODING|ACT39019||1),upstream_gene_variant(MODIFIER||2278||88|ynaE|protein_coding|CODING|ACT39020||1),upstream_gene_variant(MODIFIER||916||144|ynaF|protein_coding|CODING|ACT39021||1),upstream_gene_variant(MODIFIER||4523||88|y…	1	21	COG3203	M	NO	1427366	1428499	-	A359G	-409.5	-411.51	1.03408e-11	1.39311e-11	151.03	150.54	0.4663	0.0226	329-458	0.6479	0.9287	339-458	0.7209	0.991526	0.991913
1429164	T	C	SNP	missense_variant	MODERATE	tAc/tGc	p.Tyr1076Cys/c.3227A>G	ydbK	EFF=missense_variant(MODERATE|MISSENSE|tAc/tGc|p.Tyr1076Cys/c.3227A>G|1174|ydbK|protein_coding|CODING|ACT39023|1|1),upstream_gene_variant(MODIFIER||3884||196|pinR|protein_coding|CODING|ACT39019||1),upstream_gene_variant(MODIFIER||3301||88|ynaE|protein_coding|CODING|ACT39020||1),upstream_gene_variant(MODIFIER||1939||144|ynaF|protein_coding|CODING|ACT39021||1),upstream_gene_variant(MODIFIER||3500||…	101	65	NA	NA	NO	1428866	1432390	-	G642A-A3227G	-1462.2	-1458.9	3.27531e-38	1.17934e-37	830.11	870.21	0.5335	0.1351	603-652	0.201	0.4211	618-669	0.232	0.803292
1431749	C	T	SNP	synonymous_variant	LOW	acG/acA	p.Thr214Thr/c.642G>A	ydbK	EFF=synonymous_variant(LOW|SILENT|acG/acA|p.Thr214Thr/c.642G>A|1174|ydbK|protein_coding|CODING|ACT39023|1|1),upstream_gene_variant(MODIFIER||4524||144|ynaF|protein_coding|CODING|ACT39021||1),upstream_gene_variant(MODIFIER||915||88|ydbJ|protein_coding|CODING|ACT39024||1),upstream_gene_variant(MODIFIER||3250||377|ompN|protein_coding|CODING|ACT39022||1),upstream_gene_variant(MODIFIER||2908||879|ydbH…	101	65	NA	NA	NO	1428866	1432390	-	G642A-A3227G	-1462.2	-1458.9	3.27531e-38	1.17934e-37	830.11	870.21	0.5335	0.1351	603-652	0.201	0.4211	618-669	0.232	0.803292
1439249	C	T	SNP	missense_variant	MODERATE	cCg/cTg	p.Pro42Leu/c.125C>T	feaB	EFF=missense_variant(MODERATE|MISSENSE|cCg/cTg|p.Pro42Leu/c.125C>T|499|feaB|protein_coding|CODING|ACT39031|1|1),upstream_gene_variant(MODIFIER||4800||329|ldhA|protein_coding|CODING|ACT39026||1),upstream_gene_variant(MODIFIER||3443||102|insE-2|protein_coding|CODING|ACT39033||1|WARNING_TRANSCRIPT_NO_START_CODON),upstream_gene_variant(MODIFIER||3748||288|insF-2|protein_coding|CODING|ACT39034||1),ups…	4	39	COG1012	C	NO	1439125	1440624	+	C125T	-632.44	-634.31	1.82999e-14	1.55832e-14	480.6	367.12	0.5538	0.0013	90-223	0.9677	0.9973	98-223	0.9621	0.997684	0.980576
1445905	A	G	SNP	synonymous_variant	LOW	ttA/ttG	p.Leu476Leu/c.1428A>G	ydbD	EFF=synonymous_variant(LOW|SILENT|ttA/ttG|p.Leu476Leu/c.1428A>G|768|ydbD|protein_coding|CODING|ACT39036|1|1),upstream_gene_variant(MODIFIER||1050||201|ynbA|protein_coding|CODING|ACT39037||1),upstream_gene_variant(MODIFIER||3504||572|tynA|protein_coding|CODING|ACT39032||1),upstream_gene_variant(MODIFIER||1655||298|ynbB|protein_coding|CODING|ACT39038||1),upstream_gene_variant(MODIFIER||2567||585|yn…	2	29	NA	NA	NO	1444478	1446784	+	A1428G	-768.4	-767.5	2.00627e-27	1.93981e-27	451.13	452.18	0.4214	0.0179	1389-1438	0.6999	0.9568	1400-1594	0.7909	0.999668	0.99747
1451166	A	G	SNP	synonymous_variant	LOW	ttA/ttG	p.Leu308Leu/c.924A>G	ynbD	EFF=synonymous_variant(LOW|SILENT|ttA/ttG|p.Leu308Leu/c.924A>G|430|ynbD|protein_coding|CODING|ACT39040|1|1),upstream_gene_variant(MODIFIER||1283||1281|hrpA|protein_coding|CODING|ACT39042||1),downstream_gene_variant(MODIFIER||420||201|acpD|protein_coding|CODING|ACT39041||1),downstream_gene_variant(MODIFIER||4382||768|ydbD|protein_coding|CODING|ACT39036||1),downstream_gene_variant(MODIFIER||3606||2…	3	55	COG0671	I	NO	1450243	1451535	+	A924G	-531.24	-531.22	3.87033e-16	3.0033e-16	334.32	321.96	0.5486	0.133	767-1116	0.2053	0.223	776-996	0.1438	0.998769	0.989076
1458524	A	G	SNP	missense_variant	MODERATE	aAc/aGc	p.Asn321Ser/c.962A>G	aldA	EFF=missense_variant(MODERATE|MISSENSE|aAc/aGc|p.Asn321Ser/c.962A>G|479|aldA|protein_coding|CODING|ACT39044|1|1),upstream_gene_variant(MODIFIER||1691||91|insA-12|protein_coding|CODING|ACT39046||1|WARNING_TRANSCRIPT_NO_START_CODON),upstream_gene_variant(MODIFIER||1885||167|insB-12|protein_coding|CODING|ACT39047||1),upstream_gene_variant(MODIFIER||2487||176|cybB|protein_coding|CODING|ACT39048||1),u…	32	966	COG1012	C	NO	1457563	1459002	+	A962G	-568.14	-571.48	6.7722e-16	3.23005e-15	361.07	354.29	0.5112	0.1048	941-1017	0.2736	0.3705	935-1018	0.2062	0.984325	0.945294
1470372	C	T	SNP	missense_variant	MODERATE	Gac/Aac	p.Asp63Asn/c.187G>A	ydcK	EFF=missense_variant(MODERATE|MISSENSE|Gac/Aac|p.Asp63Asn/c.187G>A|326|ydcK|protein_coding|CODING|ACT39059|1|1),upstream_gene_variant(MODIFIER||310||330|tehA|protein_coding|CODING|ACT39060||1),upstream_gene_variant(MODIFIER||1299||197|tehB|protein_coding|CODING|ACT39061||1),upstream_gene_variant(MODIFIER||2195||222|ydcL|protein_coding|CODING|ACT39062||1),upstream_gene_variant(MODIFIER||1628||67|E…	4	64	COG1044	M	NO	1469578	1470558	-	G187A	-372.45	-368.81	1.00817e-08	5.24613e-09	106.74	109.43	0.4651	0.0735	169-225	0.3211	0.7321	170-224	0.4267	0.94274	0.931687
1474321	C	T	SNP	synonymous_variant	LOW	ggC/ggT	p.Gly185Gly/c.555C>T	ydcM	EFF=synonymous_variant(LOW|SILENT|ggC/ggT|p.Gly185Gly/c.555C>T|402|ydcM|protein_coding|CODING|ACT39063|1|1|WARNING_TRANSCRIPT_NO_START_CODON),upstream_gene_variant(MODIFIER||3763||326|ydcK|protein_coding|CODING|ACT39059||1),upstream_gene_variant(MODIFIER||1961||178|ydcN|protein_coding|CODING|ACT39065||1),upstream_gene_variant(MODIFIER||2570||653|ydcP|protein_coding|CODING|ACT39066||1|WARNING_TRAN…	15	40	COG0675	L	NO	1473767	1474975	+	C555T	-495.19	-491.61	4.70752e-10	1.08712e-10	94.2	131.64	0.4963	0.0001	540-608	0.9969	0.9999	380-638	0.996	0.994818	0.984515
1489586	C	T	SNP	synonymous_variant	LOW	ggC/ggT	p.Gly150Gly/c.450C>T	yncB	EFF=synonymous_variant(LOW|SILENT|ggC/ggT|p.Gly150Gly/c.450C>T|345|yncB|protein_coding|CODING|ACT39079|1|1),upstream_gene_variant(MODIFIER||786||221|yncC|protein_coding|CODING|ACT39080||1),upstream_gene_variant(MODIFIER||3831||353|yncE|protein_coding|CODING|ACT39082||1),upstream_gene_variant(MODIFIER||1145||149|ydcZ|protein_coding|CODING|ACT39077||1),upstream_gene_variant(MODIFIER||630||172|yncA|…	2	43	COG2130	R	NO	1489137	1490174	+	C450T-C502T	-437.05	-435.21	7.75256e-10	3.54269e-10	278.51	331.02	0.5386	0.0782	493-599	0.3627	0.6513	494-599	0.3877	0.744739	0.455837
1489638	C	T	SNP	stop_gained	HIGH	Caa/Taa	p.Gln168*/c.502C>T	yncB	EFF=stop_gained(HIGH|NONSENSE|Caa/Taa|p.Gln168*/c.502C>T|345|yncB|protein_coding|CODING|ACT39079|1|1),upstream_gene_variant(MODIFIER||734||221|yncC|protein_coding|CODING|ACT39080||1),upstream_gene_variant(MODIFIER||3779||353|yncE|protein_coding|CODING|ACT39082||1),upstream_gene_variant(MODIFIER||1197||149|ydcZ|protein_coding|CODING|ACT39077||1),upstream_gene_variant(MODIFIER||682||172|yncA|protei…	2	43	COG2130	R	NO	1489137	1490174	+	C450T-C502T	-437.05	-435.21	7.75256e-10	3.54269e-10	278.51	331.02	0.5386	0.0782	493-599	0.3627	0.6513	494-599	0.3877	0.744739	0.455837
1496865	G	GG	INS	frameshift_variant	HIGH	cct/Gcct	p.Pro170_Gly171fs/c.508_509insG	yncG	EFF=frameshift_variant(HIGH||cct/Gcct|p.Pro170_Gly171fs/c.508_509insG|205|yncG|protein_coding|CODING|ACT39084|1|1),upstream_gene_variant(MODIFIER||186||70|yncH|protein_coding|CODING|ACT39085||1),upstream_gene_variant(MODIFIER||1218||708|ECB_01413|protein_coding|CODING|ACT39086||1),upstream_gene_variant(MODIFIER||3691||700|yncD|protein_coding|CODING|ACT39081||1),upstream_gene_variant(MODIFIER||341…	2	35	COG0625	O	NO	.	.	.	.	.	.	.	.	.	.	.	.	.	.	.	.	.	.	.
1511018	T	C	SNP	missense_variant	MODERATE	tAc/tGc	p.Tyr148Cys/c.443A>G	narW	EFF=missense_variant(MODERATE|MISSENSE|tAc/tGc|p.Tyr148Cys/c.443A>G|231|narW|protein_coding|CODING|ACT39096|1|1),upstream_gene_variant(MODIFIER||3016||189|yddH|protein_coding|CODING|ACT39093||1),upstream_gene_variant(MODIFIER||250||226|narV|protein_coding|CODING|ACT39095||1),downstream_gene_variant(MODIFIER||4880||66|ECB_01417|protein_coding|CODING|ACT39090||1),downstream_gene_variant(MODIFIER||4…	1	19	COG2180	C	NO	1510765	1511460	-	A443G	-303.02	-303.94	6.63337e-09	6.64876e-09	129.83	131.33	0.5387	0.0412	412-461	0.5531	0.9126	410-463	0.7093	0.993157	0.996211
1516573	A	G	SNP	missense_variant	MODERATE	Tcc/Ccc	p.Ser57Pro/c.169T>C	narZ	EFF=missense_variant(MODERATE|MISSENSE|Tcc/Ccc|p.Ser57Pro/c.169T>C|1246|narZ|protein_coding|CODING|ACT39098|1|1),upstream_gene_variant(MODIFIER||3569||514|narY|protein_coding|CODING|ACT39097||1),upstream_gene_variant(MODIFIER||4978||1015|fdnG|protein_coding|CODING|ACT39104||1),downstream_gene_variant(MODIFIER||250||462|narU|protein_coding|CODING|ACT39099||1),downstream_gene_variant(MODIFIER||1962…	0	23	COG5013	C	NO	1513001	1516741	-	T169C	-1556.31	-1556.67	5.84133e-38	1.38551e-37	803.23	871.13	0.5312	0.0716	102-193	0.378	0.435	162-224	0.2243	0.994866	0.952745
1519657	T	A	SNP	missense_variant	MODERATE	gAt/gTt	p.Asp70Val/c.209A>T	yddK	EFF=missense_variant(MODERATE|MISSENSE|gAt/gTt|p.Asp70Val/c.209A>T|318|yddK|protein_coding|CODING|ACT39101|1|1),upstream_gene_variant(MODIFIER||1894||1015|fdnG|protein_coding|CODING|ACT39104||1),upstream_gene_variant(MODIFIER||2916||1246|narZ|protein_coding|CODING|ACT39098||1),upstream_gene_variant(MODIFIER||1446||462|narU|protein_coding|CODING|ACT39099||1),upstream_gene_variant(MODIFIER||787||11…	NA	NA	COG4886	S	NO	1518909	1519865	-	A209T	-190.35	-192.28	1.70296e-08	1.71109e-08	164.93	166.09	0.3441	0.0039	209-363	0.8932	0.9757	209-363	0.8478	0.994851	0.994543
1531239	G	GG	INS	frameshift_variant	HIGH	ctc/ctCc	p.Leu246_Pro247fs/c.737_738insC	yddO	EFF=frameshift_variant(HIGH||ctc/ctCc|p.Leu246_Pro247fs/c.737_738insC|308|yddO|protein_coding|CODING|ACT39113|1|1|WARNING_TRANSCRIPT_NO_START_CODON),upstream_gene_variant(MODIFIER||4542||120|yddM|protein_coding|CODING|ACT39107||1),upstream_gene_variant(MODIFIER||3464||336|adhP|protein_coding|CODING|ACT39108||1),upstream_gene_variant(MODIFIER||1633||565|sfcA|protein_coding|CODING|ACT39109||1),upst…	1	15	COG1124	EP	NO	.	.	.	.	.	.	.	.	.	.	.	.	.	.	.	.	.	.	.
1531240	A	G	SNP	missense_variant	MODERATE	cTc/cCc	p.Leu246Pro/c.737T>C	yddO	EFF=missense_variant(MODERATE|MISSENSE|cTc/cCc|p.Leu246Pro/c.737T>C|308|yddO|protein_coding|CODING|ACT39113|1|1|WARNING_TRANSCRIPT_NO_START_CODON),upstream_gene_variant(MODIFIER||4542||120|yddM|protein_coding|CODING|ACT39107||1),upstream_gene_variant(MODIFIER||3464||336|adhP|protein_coding|CODING|ACT39108||1),upstream_gene_variant(MODIFIER||1633||565|sfcA|protein_coding|CODING|ACT39109||1),upstre…	1	15	COG1124	EP	NO	.	.	.	.	.	.	.	.	.	.	.	.	.	.	.	.	.	.	.
1535678	C	T	SNP	missense_variant	MODERATE	Gac/Aac	p.Asp248Asn/c.742G>A	yddS	EFF=missense_variant(MODERATE|MISSENSE|Gac/Aac|p.Asp248Asn/c.742G>A|516|yddS|protein_coding|CODING|ACT39117|1|1),upstream_gene_variant(MODIFIER||3702||308|yddO|protein_coding|CODING|ACT39113||1|WARNING_TRANSCRIPT_NO_START_CODON),upstream_gene_variant(MODIFIER||2723||328|yddP|protein_coding|CODING|ACT39114||1),upstream_gene_variant(MODIFIER||1830||298|yddQ|protein_coding|CODING|ACT39115||1),upstre…	0	70	COG0747	E	NO	1534869	1536419	-	G742A	-580.62	-579.75	1.39559e-15	1.27005e-15	352.63	251.41	0.5162	0.0052	715-765	0.9012	0.9797	675-816	0.8766	0.999069	0.967919
1544188	G	A	SNP	missense_variant	MODERATE	Ccg/Tcg	p.Pro85Ser/c.253C>T	xasA	EFF=missense_variant(MODERATE|MISSENSE|Ccg/Tcg|p.Pro85Ser/c.253C>T|511|xasA|protein_coding|CODING|ACT39122|1|1),upstream_gene_variant(MODIFIER||4517||799|dos|protein_coding|CODING|ACT39119||1),upstream_gene_variant(MODIFIER||3449||347|yddV|protein_coding|CODING|ACT39120||1|WARNING_TRANSCRIPT_NO_START_CODON),upstream_gene_variant(MODIFIER||1414||439|yddW|protein_coding|CODING|ACT39121||1),downstre…	2	160	COG0531	E	NO	1542905	1544440	-	C253T	-607.5	-609.43	4.70607e-18	6.33023e-18	375.38	344.18	0.4863	0.0651	248-452	0.3523	0.7249	226-382	0.4221	0.989192	0.973884
1551947	A	G	SNP	synonymous_variant	LOW	tgT/tgC	p.Cys449Cys/c.1347T>C	yddA	EFF=synonymous_variant(LOW|SILENT|tgT/tgC|p.Cys449Cys/c.1347T>C|561|yddA|protein_coding|CODING|ACT39126|1|1),upstream_gene_variant(MODIFIER||2794||931|pqqL|protein_coding|CODING|ACT39124||1),upstream_gene_variant(MODIFIER||377||790|yddB|protein_coding|CODING|ACT39125||1),downstream_gene_variant(MODIFIER||1637||385|ydeM|protein_coding|CODING|ACT39127||1),downstream_gene_variant(MODIFIER||2846||560…	24	33	COG4178	R	NO	1551608	1553293	-	T1347C	-571	-569.65	3.3918e-18	4.0921e-18	332.17	335.64	0.4514	0.0143	1254-1360	0.7431	0.9346	1258-1350	0.7345	0.985651	0.904784
1559052	C	CC	INS	frameshift_variant	HIGH	atg/atGg	p.Met462_Gly463fs/c.1385_1386insG	ydeP	EFF=frameshift_variant(HIGH||atg/atGg|p.Met462_Gly463fs/c.1385_1386insG|759|ydeP|protein_coding|CODING|ACT39131|1|1),upstream_gene_variant(MODIFIER||4312||385|ydeM|protein_coding|CODING|ACT39127||1),upstream_gene_variant(MODIFIER||2578||560|ydeN|protein_coding|CODING|ACT39128||1),upstream_gene_variant(MODIFIER||1415||253|ydeO|protein_coding|CODING|ACT39129||1),upstream_gene_variant(MODIFIER||1143…	2	22	COG0243	C	NO	.	.	.	.	.	.	.	.	.	.	.	.	.	.	.	.	.	.	.
1569676	T	C	SNP	upstream_gene_variant	MODIFIER	.	.	.	EFF=upstream_gene_variant(MODIFIER||1111||265|ydeZ|protein_coding|CODING|ACT39139||1),upstream_gene_variant(MODIFIER||1920||340|yneA|protein_coding|CODING|ACT39140||1),upstream_gene_variant(MODIFIER||2573||178|yneL|protein_coding|CODING|ACT39136||1),upstream_gene_variant(MODIFIER||2969||291|yneB|protein_coding|CODING|ACT39141||1),upstream_gene_variant(MODIFIER||3868||96|yneC|protein_coding|CODING…	.	.	NA	NA	.	.	.	.	.	.	.	.	.	.	.	.	.	.	.	.	.	.	.	.
1571050	A	G	SNP	synonymous_variant	LOW	acA/acG	p.Thr88Thr/c.264A>G	ydeZ	EFF=synonymous_variant(LOW|SILENT|acA/acG|p.Thr88Thr/c.264A>G|265|ydeZ|protein_coding|CODING|ACT39139|1|1),upstream_gene_variant(MODIFIER||546||340|yneA|protein_coding|CODING|ACT39140||1),upstream_gene_variant(MODIFIER||3947||178|yneL|protein_coding|CODING|ACT39136||1),upstream_gene_variant(MODIFIER||1595||291|yneB|protein_coding|CODING|ACT39141||1),upstream_gene_variant(MODIFIER||2494||96|yneC|p…	0	24	COG1172	G	NO	1570787	1571584	+	A264G	-354.98	-357.1	7.88303e-10	1.43656e-09	219.11	204.11	0.5411	0.1274	248-297	0.2173	0.1513	253-302	0.1194	0.964541	0.970332
1604632	T	A	SNP	synonymous_variant	LOW	ggA/ggT	p.Gly417Gly/c.1251A>T	stfR	EFF=synonymous_variant(LOW|SILENT|ggA/ggT|p.Gly417Gly/c.1251A>T|792|stfR|protein_coding|CODING|ACT39175|1|1),upstream_gene_variant(MODIFIER||4580||427|ydfJ|protein_coding|CODING|ACT39169||1),upstream_gene_variant(MODIFIER||2134||97|ECB_01505|protein_coding|CODING|ACT39172||1),upstream_gene_variant(MODIFIER||3341||102|insE-3|protein_coding|CODING|ACT39178||1|WARNING_TRANSCRIPT_NO_START_CODON),upst…	1	23	NA	NA	NO	1603504	1605882	-	A1251T	-832.66	-836.97	9.61053e-27	2.41889e-26	444.58	440.91	0.4165	0.0534	1216-1265	0.4126	0.7937	1215-1264	0.5002	0.991658	0.994905
1611968	A	G	SNP	missense_variant	MODERATE	gTt/gCt	p.Val95Ala/c.284T>C	ydfQ-2	EFF=missense_variant(MODERATE|MISSENSE|gTt/gCt|p.Val95Ala/c.284T>C|177|ydfQ-2|protein_coding|CODING|ACT39186|1|1),upstream_gene_variant(MODIFIER||4036||439|ECB_01510|protein_coding|CODING|ACT39177||1),upstream_gene_variant(MODIFIER||2464||68|ybcW|protein_coding|CODING|ACT39180||1),upstream_gene_variant(MODIFIER||1995||57|gnsB|protein_coding|CODING|ACT39181||1),upstream_gene_variant(MODIFIER||1667…	0	36	NA	NA	NO	1611718	1612251	-	T284C	-218.23	-220.9	1.61645e-05	1.59524e-05	163.61	163.58	0.5112	0	251-300	1	1	207-361	0.9995	1	0.999999
1618839	G	A	SNP	missense_variant	MODERATE	Cca/Tca	p.Pro79Ser/c.235C>T	ECB_01530	EFF=missense_variant(MODERATE|MISSENSE|Cca/Tca|p.Pro79Ser/c.235C>T|92|ECB_01530|protein_coding|CODING|ACT39196|1|1),upstream_gene_variant(MODIFIER||4591||237|ECB_01522|protein_coding|CODING|ACT39189||1),upstream_gene_variant(MODIFIER||3462||240|ECB_01523|protein_coding|CODING|ACT39190||1|WARNING_TRANSCRIPT_NO_START_CODON),upstream_gene_variant(MODIFIER||711||126|ECB_01528|protein_coding|CODING|AC…	NA	NA	NA	NA	NO	1618795	1619073	-	C235T	-90.96	-90.96	0.0058645	0.00360228	15.62	15.94	0.5265	0	229-278	1	1	49-278	0.9993	0.999914	0.997753
1625053	T	C	SNP	upstream_gene_variant	MODIFIER	.	.	.	EFF=upstream_gene_variant(MODIFIER||4989||29|ECB_01533|protein_coding|CODING|ACT39199||1|WARNING_TRANSCRIPT_NO_START_CODON),upstream_gene_variant(MODIFIER||271||62|dicB|protein_coding|CODING|ACT39209||1),upstream_gene_variant(MODIFIER||456||63|ydfD|protein_coding|CODING|ACT39210||1),upstream_gene_variant(MODIFIER||741||823|ydfE|protein_coding|CODING|ACT39211||1),upstream_gene_variant(MODIFIER||38…	.	.	NA	NA	.	.	.	.	.	.	.	.	.	.	.	.	.	.	.	.	.	.	.	.
1626647	G	A	SNP	missense_variant	MODERATE	cGc/cAc	p.Arg285His/c.854G>A	ydfE	EFF=missense_variant(MODERATE|MISSENSE|cGc/cAc|p.Arg285His/c.854G>A|823|ydfE|protein_coding|CODING|ACT39211|1|1),upstream_gene_variant(MODIFIER||4900||140|ECB_01535|protein_coding|CODING|ACT39201||1|WARNING_TRANSCRIPT_NO_START_CODON),upstream_gene_variant(MODIFIER||3840||339|ECB_01536|protein_coding|CODING|ACT39202||1),upstream_gene_variant(MODIFIER||3452||153|ydfX|protein_coding|CODING|ACT39203|…	NA	NA	NA	NA	NO	1625794	1628265	+	G854A	-862.29	-860.63	4.45696e-25	2.89453e-25	506.56	490.66	0.4963	0.0059	708-1032	0.8673	0.9761	844-910	0.8521	0.997343	0.994225
1628360	T	C	SNP	missense_variant	MODERATE	gTc/gCc	p.Val8Ala/c.23T>C	ECB_01546	EFF=missense_variant(MODERATE|MISSENSE|gTc/gCc|p.Val8Ala/c.23T>C|83|ECB_01546|protein_coding|CODING|ACT39212|1|1),upstream_gene_variant(MODIFIER||4891||76|dicC|protein_coding|CODING|ACT39204||1),upstream_gene_variant(MODIFIER||3452||95|ECB_01542|protein_coding|CODING|ACT39208||1|WARNING_TRANSCRIPT_NO_START_CODON),upstream_gene_variant(MODIFIER||4643||113|ynfB|protein_coding|CODING|ACT39216||1),do…	NA	NA	NA	NA	NO	1628338	1628589	+	T23C	-66.79	-66.96	7.84076e-05	3.21337e-05	60.12	45.72	0.4395	0.0641	15-139	0.3243	0.797	13-139	0.4563	0.607622	0.644549
1640040	T	C	SNP	missense_variant	MODERATE	Tgg/Cgg	p.Trp764Arg/c.2290T>C	ynfF	EFF=missense_variant(MODERATE|MISSENSE|Tgg/Cgg|p.Trp764Arg/c.2290T>C|807|ynfF|protein_coding|CODING|ACT39221|1|1),upstream_gene_variant(MODIFIER||145||205|ynfG|protein_coding|CODING|ACT39222||1),upstream_gene_variant(MODIFIER||764||284|ynfH|protein_coding|CODING|ACT39223||1),upstream_gene_variant(MODIFIER||1661||204|ynfI|protein_coding|CODING|ACT39224||1),upstream_gene_variant(MODIFIER||2470||418…	4	24	COG0243	C	NO	1637751	1640174	+	T2290C	-924.96	-927.06	6.49647e-24	6.40542e-24	550.11	550.06	0.5343	0	2217-2360	0.9999	1	2217-2367	0.9989	1	0.999992
1641959	T	C	SNP	missense_variant	MODERATE	Tgg/Cgg	p.Trp87Arg/c.259T>C	ynfI	EFF=missense_variant(MODERATE|MISSENSE|Tgg/Cgg|p.Trp87Arg/c.259T>C|204|ynfI|protein_coding|CODING|ACT39224|1|1),upstream_gene_variant(MODIFIER||551||418|ynfJ|protein_coding|CODING|ACT39225||1),upstream_gene_variant(MODIFIER||4935||417|ynfM|protein_coding|CODING|ACT39229||1|WARNING_TRANSCRIPT_NO_START_CODON),downstream_gene_variant(MODIFIER||4269||808|ynfE|protein_coding|CODING|ACT39220||1),downst…	39	37	COG3381	R	NO	1641701	1642315	+	T259C	-275.02	-275.02	6.8898e-06	4.59883e-06	120.03	130.23	0.5586	0.0142	213-264	0.7848	0.9867	209-261	0.9041	0.998089	0.99159
1647472	G	A	SNP	synonymous_variant	LOW	ctG/ctA	p.Leu193Leu/c.579G>A	ynfM	EFF=synonymous_variant(LOW|SILENT|ctG/ctA|p.Leu193Leu/c.579G>A|417|ynfM|protein_coding|CODING|ACT39229|1|1|WARNING_TRANSCRIPT_NO_START_CODON),upstream_gene_variant(MODIFIER||1099||102|asr|protein_coding|CODING|ACT39230||1),upstream_gene_variant(MODIFIER||1683||273|ydgD|protein_coding|CODING|ACT39231||1),upstream_gene_variant(MODIFIER||3058||231|ynfK|protein_coding|CODING|ACT39226||1),upstream_gen…	11	36	COG0477	GEPR	NO	1646894	1648147	+	G579A	-520.94	-519.31	2.21499e-15	1.18535e-15	381.78	380.91	0.5062	0.0027	561-668	0.9415	0.9874	561-640	0.9073	0.98919	0.946323
1673653	AGA	A	DEL	upstream_gene_variant	MODIFIER	.	.	.	EFF=upstream_gene_variant(MODIFIER||3608||421|uidC|protein_coding|CODING|ACT39248||1),upstream_gene_variant(MODIFIER||2196||457|uidB|protein_coding|CODING|ACT39249||1),upstream_gene_variant(MODIFIER||2895||530|malX|protein_coding|CODING|ACT39254||1),upstream_gene_variant(MODIFIER||4497||390|malY|protein_coding|CODING|ACT39255||1),upstream_gene_variant(MODIFIER||388||603|uidA|protein_coding|CODING…	.	.	NA	NA	.	.	.	.	.	.	.	.	.	.	.	.	.	.	.	.	.	.	.	.
1679154	A	G	SNP	missense_variant	MODERATE	gAc/gGc	p.Asp335Gly/c.1004A>G	malY	EFF=missense_variant(MODERATE|MISSENSE|gAc/gGc|p.Asp335Gly/c.1004A>G|390|malY|protein_coding|CODING|ACT39255|1|1),upstream_gene_variant(MODIFIER||4907||196|uidR|protein_coding|CODING|ACT39251||1),upstream_gene_variant(MODIFIER||273||333|add|protein_coding|CODING|ACT39256||1),upstream_gene_variant(MODIFIER||3919||255|hdhA|protein_coding|CODING|ACT39252||1|WARNING_TRANSCRIPT_NO_START_CODON),upstrea…	23	43	COG1168	E	NO	1678151	1679323	+	A1004G	-500.63	-501.08	9.05819e-12	7.91507e-12	343.61	285.97	0.5081	0.0638	916-1052	0.4227	0.7014	924-1011	0.4274	0.998947	0.989621
1679987	GCG	G	DEL	frameshift_variant	HIGH	cgt/	p.Arg188fs/c.562_563delCG	add	EFF=frameshift_variant(HIGH||cgt/|p.Arg188fs/c.562_563delCG|333|add|protein_coding|CODING|ACT39256|1|1),upstream_gene_variant(MODIFIER||4753||255|hdhA|protein_coding|CODING|ACT39252||1|WARNING_TRANSCRIPT_NO_START_CODON),upstream_gene_variant(MODIFIER||3614||342|malI|protein_coding|CODING|ACT39253||1),upstream_gene_variant(MODIFIER||1757||41|blr|protein_coding|CODING|ACT39258||1),upstream_gene_var…	77	48	COG1057	H	NO	.	.	.	.	.	.	.	.	.	.	.	.	.	.	.	.	.	.	.
1687910	C	T	SNP	synonymous_variant	LOW	acC/acT	p.Thr171Thr/c.513C>T	rnfG	EFF=synonymous_variant(LOW|SILENT|acC/acT|p.Thr171Thr/c.513C>T|206|rnfG|protein_coding|CODING|ACT39265|1|1),upstream_gene_variant(MODIFIER||112||231|rnfE|protein_coding|CODING|ACT39266||1|WARNING_TRANSCRIPT_NO_START_CODON),upstream_gene_variant(MODIFIER||807||211|nth|protein_coding|CODING|ACT39267||1),upstream_gene_variant(MODIFIER||2053||500|ydgR|protein_coding|CODING|ACT39268||1|WARNING_TRANSCR…	95	37	COG4659	C	NO	1687398	1688018	+	C513T	-237.81	-235.45	3.63556e-07	3.58267e-07	146.41	146.99	0.5405	0.0529	504-572	0.494	0.5912	523-572	0.3421	0.982068	0.924791
1701461	G	A	SNP	missense_variant	MODERATE	gCg/gTg	p.Ala130Val/c.389C>T	sodC	EFF=missense_variant(MODERATE|MISSENSE|gCg/gTg|p.Ala130Val/c.389C>T|173|sodC|protein_coding|CODING|ACT39280|1|1),upstream_gene_variant(MODIFIER||4665||369|ydhH|protein_coding|CODING|ACT39274||1),upstream_gene_variant(MODIFIER||3443||144|slyA|protein_coding|CODING|ACT39276||1),upstream_gene_variant(MODIFIER||1840||171|ydhM|protein_coding|CODING|ACT39283||1),upstream_gene_variant(MODIFIER||2392||36…	14	93	COG2032	P	NO	.	.	.	.	.	.	.	.	.	.	.	.	.	.	.	.	.	.	.
1701672	G	GGGGGG	INS	frameshift_variant	HIGH	tta/ttaCCCCC	p.Leu59_Pro60fs/c.177_178insCCCCC	sodC	EFF=frameshift_variant(HIGH||tta/ttaCCCCC|p.Leu59_Pro60fs/c.177_178insCCCCC|173|sodC|protein_coding|CODING|ACT39280|1|1),upstream_gene_variant(MODIFIER||4877||369|ydhH|protein_coding|CODING|ACT39274||1),upstream_gene_variant(MODIFIER||3655||144|slyA|protein_coding|CODING|ACT39276||1),upstream_gene_variant(MODIFIER||1628||171|ydhM|protein_coding|CODING|ACT39283||1),upstream_gene_variant(MODIFIER||…	14	93	COG2032	P	NO	.	.	.	.	.	.	.	.	.	.	.	.	.	.	.	.	.	.	.
1709109	C	T	SNP	synonymous_variant	LOW	gaC/gaT	p.Asp943Asp/c.2829C>T	lhr	EFF=synonymous_variant(LOW|SILENT|gaC/gaT|p.Asp943Asp/c.2829C>T|1538|lhr|protein_coding|CODING|ACT39287|1|1),upstream_gene_variant(MODIFIER||2520||271|ydhO|protein_coding|CODING|ACT39289||1|WARNING_TRANSCRIPT_NO_START_CODON),upstream_gene_variant(MODIFIER||3463||193|sodB|protein_coding|CODING|ACT39290||1),downstream_gene_variant(MODIFIER||4159||365|nemA|protein_coding|CODING|ACT39284||1),downstre…	3	31	COG1201	R	NO	1706281	1710897	+	C2829T	-2055.06	-2055.06	7.914e-49	3.50424e-49	1200.46	1115	0.5686	0.0975	2793-2842	0.2952	0.7167	2748-2829	0.4476	0.985906	0.970011
1722046	G	A	SNP	synonymous_variant	LOW	cgG/cgA	p.Arg441Arg/c.1323G>A	norM	EFF=synonymous_variant(LOW|SILENT|cgG/cgA|p.Arg441Arg/c.1323G>A|457|norM|protein_coding|CODING|ACT39298|1|1|WARNING_TRANSCRIPT_NO_START_CODON),upstream_gene_variant(MODIFIER||4981||310|ydhB|protein_coding|CODING|ACT39294||1),upstream_gene_variant(MODIFIER||1656|||valV|tRNA|NON_CODING|ECB_t00027||1),upstream_gene_variant(MODIFIER||1737|||valW|tRNA|NON_CODING|ECB_t00028||1),upstream_gene_variant(MO…	26	42	COG0534	V	NO	1720724	1722097	+	G1323A	-586.43	-583.94	2.72221e-14	2.11771e-15	362.33	385.35	0.5119	0.0135	1307-1356	0.7824	0.8062	1304-1353	0.5274	0.995902	0.997519
1730806	A	AA	INS	frameshift_variant	HIGH	ggc/ggcT	p.Gly97_Phe98fs/c.291_292insT	ydhV	EFF=frameshift_variant(HIGH||ggc/ggcT|p.Gly97_Phe98fs/c.291_292insT|700|ydhV|protein_coding|CODING|ACT39306|1|1),upstream_gene_variant(MODIFIER||3981||270|ydhT|protein_coding|CODING|ACT39302||1),upstream_gene_variant(MODIFIER||3192||261|ydhU|protein_coding|CODING|ACT39303||1),upstream_gene_variant(MODIFIER||2158||470|pykF|protein_coding|CODING|ACT39309||1),upstream_gene_variant(MODIFIER||2527||22…	0	22	COG2414	C	NO	.	.	.	.	.	.	.	.	.	.	.	.	.	.	.	.	.	.	.
1733173	C	A	SNP	missense_variant	MODERATE	cCg/cAg	p.Pro70Gln/c.209C>A	pykF	EFF=missense_variant(MODERATE|MISSENSE|cCg/cAg|p.Pro70Gln/c.209C>A|470|pykF|protein_coding|CODING|ACT39309|1|1),upstream_gene_variant(MODIFIER||4893||222|ydhX|protein_coding|CODING|ACT39304||1),upstream_gene_variant(MODIFIER||4182||215|ydhW|protein_coding|CODING|ACT39305||1),upstream_gene_variant(MODIFIER||1515||78|lpp|protein_coding|CODING|ACT39310||1),upstream_gene_variant(MODIFIER||2076||700|y…	1040	422	COG0469	G	NO	1732965	1734377	+	C209A-A507G	-519.68	-524.59	1.00543e-15	1.08384e-15	229.88	214.06	0.4793	0.0337	435-514	0.5466	0.9072	435-514	0.6761	0.990272	0.986449
1733471	A	G	SNP	synonymous_variant	LOW	gcA/gcG	p.Ala169Ala/c.507A>G	pykF	EFF=synonymous_variant(LOW|SILENT|gcA/gcG|p.Ala169Ala/c.507A>G|470|pykF|protein_coding|CODING|ACT39309|1|1),upstream_gene_variant(MODIFIER||4480||215|ydhW|protein_coding|CODING|ACT39305||1),upstream_gene_variant(MODIFIER||1217||78|lpp|protein_coding|CODING|ACT39310||1),upstream_gene_variant(MODIFIER||2374||700|ydhV|protein_coding|CODING|ACT39306||1),upstream_gene_variant(MODIFIER||1727||208|ydhY|…	1040	422	COG0469	G	NO	1732965	1734377	+	C209A-A507G	-519.68	-524.59	1.00543e-15	1.08384e-15	229.88	214.06	0.4793	0.0337	435-514	0.5466	0.9072	435-514	0.6761	0.990272	0.986449
1734971	TT	T	DEL	upstream_gene_variant	MODIFIER	.	.	.	EFF=upstream_gene_variant(MODIFIER||3875||700|ydhV|protein_coding|CODING|ACT39306||1),upstream_gene_variant(MODIFIER||3228||208|ydhY|protein_coding|CODING|ACT39307||1),upstream_gene_variant(MODIFIER||2564||69|ydhZ|protein_coding|CODING|ACT39308||1),downstream_gene_variant(MODIFIER||16||334|ynhG|protein_coding|CODING|ACT39311||1),downstream_gene_variant(MODIFIER||1169||138|sufE|protein_coding|CODI…	.	.	NA	NA	.	.	.	.	.	.	.	.	.	.	.	.	.	.	.	.	.	.	.	.
1741921	A	AA	INS	upstream_gene_variant	MODIFIER	.	.	.	EFF=upstream_gene_variant(MODIFIER||4132||406|sufS|protein_coding|CODING|ACT39313||1),upstream_gene_variant(MODIFIER||2864||423|sufD|protein_coding|CODING|ACT39314||1),upstream_gene_variant(MODIFIER||2143||248|sufC|protein_coding|CODING|ACT39315||1),upstream_gene_variant(MODIFIER||646||495|sufB|protein_coding|CODING|ACT39316||1),upstream_gene_variant(MODIFIER||4419||370|ydiK|protein_coding|CODING…	.	.	NA	NA	.	.	.	.	.	.	.	.	.	.	.	.	.	.	.	.	.	.	.	.
1746745	G	GG	INS	frameshift_variant	HIGH	acg/Gacg	p.Thr136_Ala137fs/c.406_407insG	ydiK	EFF=frameshift_variant(HIGH||acg/Gacg|p.Thr136_Ala137fs/c.406_407insG|370|ydiK|protein_coding|CODING|ACT39321|1|1),upstream_gene_variant(MODIFIER||4276||89|ydiH|protein_coding|CODING|ACT39318||1|WARNING_TRANSCRIPT_NO_START_CODON),upstream_gene_variant(MODIFIER||1136||118|ydiL|protein_coding|CODING|ACT39322||1),upstream_gene_variant(MODIFIER||3847||136|ydiI|protein_coding|CODING|ACT39319||1),upstr…	71	98	COG0628	R	NO	.	.	.	.	.	.	.	.	.	.	.	.	.	.	.	.	.	.	.
1748728	C	T	SNP	upstream_gene_variant	MODIFIER	.	.	.	EFF=upstream_gene_variant(MODIFIER||1050||421|ydiN|protein_coding|CODING|ACT39323||1),upstream_gene_variant(MODIFIER||2776||1018|ydiJ|protein_coding|CODING|ACT39320||1),upstream_gene_variant(MODIFIER||2327||288|ydiB|protein_coding|CODING|ACT39324||1),upstream_gene_variant(MODIFIER||3224||252|aroD|protein_coding|CODING|ACT39325||1),upstream_gene_variant(MODIFIER||4127||531|ydiF|protein_coding|CODI…	.	.	NA	NA	.	.	.	.	.	.	.	.	.	.	.	.	.	.	.	.	.	.	.	.
1781555	G	A	SNP	upstream_gene_variant	MODIFIER	.	.	.	EFF=upstream_gene_variant(MODIFIER||4539||118|rplT|protein_coding|CODING|ACT39348||1),upstream_gene_variant(MODIFIER||4289||65|rpmI|protein_coding|CODING|ACT39349||1),upstream_gene_variant(MODIFIER||860||40|ECB_01690|protein_coding|CODING|ACT39352||1),upstream_gene_variant(MODIFIER||3758||144|infC|protein_coding|CODING|ACT39350||1|WARNING_TRANSCRIPT_NO_START_CODON),upstream_gene_variant(MODIFIER|…	.	.	NA	NA	.	.	.	.	.	.	.	.	.	.	.	.	.	.	.	.	.	.	.	.
1783102	T	C	SNP	missense_variant	MODERATE	Aac/Gac	p.Asn83Asp/c.247A>G	ydiY	EFF=missense_variant(MODERATE|MISSENSE|Aac/Gac|p.Asn83Asp/c.247A>G|252|ydiY|protein_coding|CODING|ACT39353|1|1),upstream_gene_variant(MODIFIER||533||309|pfkB|protein_coding|CODING|ACT39354||1),upstream_gene_variant(MODIFIER||1563||96|ydiZ|protein_coding|CODING|ACT39355||1),upstream_gene_variant(MODIFIER||3265||642|thrS|protein_coding|CODING|ACT39351||1),upstream_gene_variant(MODIFIER||1959||286|y…	102	59	COG3137	M	NO	1782590	1783348	-	A247G	-276.94	-276.54	2.88276e-10	2.91426e-10	168.24	168.26	0.4863	0	241-295	0.9995	1	48-298	0.9988	1	0.999966
1783664	G	A	SNP	synonymous_variant	LOW	gcG/gcA	p.Ala10Ala/c.30G>A	pfkB	EFF=synonymous_variant(LOW|SILENT|gcG/gcA|p.Ala10Ala/c.30G>A|309|pfkB|protein_coding|CODING|ACT39354|1|1),upstream_gene_variant(MODIFIER||1001||96|ydiZ|protein_coding|CODING|ACT39355||1),upstream_gene_variant(MODIFIER||3827||642|thrS|protein_coding|CODING|ACT39351||1),upstream_gene_variant(MODIFIER||1397||286|yniA|protein_coding|CODING|ACT39356||1),upstream_gene_variant(MODIFIER||2981||222|yniC|p…	29	104	COG1105	G	NO	1783635	1784564	+	G30A	-379.78	-374.02	7.00453e-09	2.73002e-09	272.93	325	0.5913	0.0435	26-90	0.4863	0.779	1951-02-01	0.4558	0.989881	0.966181
1787749	G	A	SNP	missense_variant	MODERATE	Gtt/Att	p.Val92Ile/c.274G>A	ydjM	EFF=missense_variant(MODERATE|MISSENSE|Gtt/Att|p.Val92Ile/c.274G>A|196|ydjM|protein_coding|CODING|ACT39359|1|1),upstream_gene_variant(MODIFIER||450||463|ydjN|protein_coding|CODING|ACT39360||1),upstream_gene_variant(MODIFIER||4401||252|ydiY|protein_coding|CODING|ACT39353||1),upstream_gene_variant(MODIFIER||3383||753|katE|protein_coding|CODING|ACT39363||1),upstream_gene_variant(MODIFIER||1251||178|…	34	18	COG1988	R	NO	1787476	1788066	+	G274A	-215.34	-214.73	1.62972e-08	3.12939e-08	181.38	86.97	0.5212	0.0817	229-278	0.3493	0.5906	259-322	0.3394	0.95982	0.953928
1799047	G	A	SNP	upstream_gene_variant	MODIFIER	.	.	.	EFF=upstream_gene_variant(MODIFIER||4647||249|ydjC|protein_coding|CODING|ACT39364||1),upstream_gene_variant(MODIFIER||676||275|nadE|protein_coding|CODING|ACT39371||1),upstream_gene_variant(MODIFIER||3282||450|celF|protein_coding|CODING|ACT39365||1),upstream_gene_variant(MODIFIER||1733||295|ydjQ|protein_coding|CODING|ACT39372||1|WARNING_TRANSCRIPT_NO_START_CODON),upstream_gene_variant(MODIFIER||23…	.	.	NA	NA	.	.	.	.	.	.	.	.	.	.	.	.	.	.	.	.	.	.	.	.
1804194	CC	C	DEL	frameshift_variant	HIGH	ggg/	p.Gly444fs/c.1330delG	astB	EFF=frameshift_variant(HIGH||ggg/|p.Gly444fs/c.1330delG|447|astB|protein_coding|CODING|ACT39376|1|1),upstream_gene_variant(MODIFIER||4674||112|osmE|protein_coding|CODING|ACT39370||1),upstream_gene_variant(MODIFIER||1993||191|ydjR|protein_coding|CODING|ACT39373||1),upstream_gene_variant(MODIFIER||1305||161|spy|protein_coding|CODING|ACT39374||1),upstream_gene_variant(MODIFIER||7||322|astE|protein_c…	0	30	COG3724	E	NO	.	.	.	.	.	.	.	.	.	.	.	.	.	.	.	.	.	.	.
1806006	T	C	SNP	missense_variant	MODERATE	Act/Gct	p.Thr332Ala/c.994A>G	astD	EFF=missense_variant(MODERATE|MISSENSE|Act/Gct|p.Thr332Ala/c.994A>G|492|astD|protein_coding|CODING|ACT39377|1|1),upstream_gene_variant(MODIFIER||3804||191|ydjR|protein_coding|CODING|ACT39373||1),upstream_gene_variant(MODIFIER||3116||161|spy|protein_coding|CODING|ACT39374||1),upstream_gene_variant(MODIFIER||1818||322|astE|protein_coding|CODING|ACT39375||1),upstream_gene_variant(MODIFIER||3687||268…	0	9	COG1012	C	NO	1805521	1806999	-	A994G	-711.53	-714.76	2.87359e-17	4.97403e-17	374.38	367.72	0.5761	0.0541	985-1035	0.4749	0.7647	985-1035	0.4979	0.822127	0.714414
1810973	T	C	SNP	missense_variant	MODERATE	cTg/cCg	p.Leu103Pro/c.308T>C	ydjX	EFF=missense_variant(MODERATE|MISSENSE|cTg/cCg|p.Leu103Pro/c.308T>C|236|ydjX|protein_coding|CODING|ACT39381|1|1),upstream_gene_variant(MODIFIER||3974||492|astD|protein_coding|CODING|ACT39377||1),upstream_gene_variant(MODIFIER||1063||235|ydjZ|protein_coding|CODING|ACT39382||1),upstream_gene_variant(MODIFIER||1770||182|ynjA|protein_coding|CODING|ACT39383||1),upstream_gene_variant(MODIFIER||2943||34…	3	92	COG0398	S	NO	1810666	1811376	+	T308C	-217.22	-217.13	4.47645e-07	4.48338e-07	140.49	142.55	0.4813	0.0004	115-311	0.9853	0.9987	115-311	0.9735	0.998557	0.994271
1822154	AA	A	DEL	upstream_gene_variant	MODIFIER	.	.	.	EFF=upstream_gene_variant(MODIFIER||3524||206|ynjF|protein_coding|CODING|ACT39388||1|WARNING_TRANSCRIPT_NO_START_CODON),upstream_gene_variant(MODIFIER||2792||90|ynjH|protein_coding|CODING|ACT39390||1|WARNING_TRANSCRIPT_NO_START_CODON),upstream_gene_variant(MODIFIER||3910||618|sppA|protein_coding|CODING|ACT39396||1),upstream_gene_variant(MODIFIER||56||346|ynjI|protein_coding|CODING|ACT39392||1),do…	.	.	NA	NA	.	.	.	.	.	.	.	.	.	.	.	.	.	.	.	.	.	.	.	.
1827816	G	A	SNP	synonymous_variant	LOW	ctG/ctA	p.Leu584Leu/c.1752G>A	sppA	EFF=synonymous_variant(LOW|SILENT|ctG/ctA|p.Leu584Leu/c.1752G>A|618|sppA|protein_coding|CODING|ACT39396|1|1),upstream_gene_variant(MODIFIER||272||338|ansA|protein_coding|CODING|ACT39397||1),upstream_gene_variant(MODIFIER||1299||213|pncA|protein_coding|CODING|ACT39398||1),upstream_gene_variant(MODIFIER||3628||653|topB|protein_coding|CODING|ACT39393||1),upstream_gene_variant(MODIFIER||2580||347|sel…	82	65	COG0616	OU	NO	1826065	1827921	+	G1752A	-776.64	-777.74	8.21544e-19	2.30065e-18	501.19	484.29	0.5131	0.0166	1738-1787	0.7613	0.949	1738-1789	0.7924	0.982281	0.992066
1828949	G	A	SNP	missense_variant	MODERATE	Gcc/Acc	p.Ala288Thr/c.862G>A	ansA	EFF=missense_variant(MODERATE|MISSENSE|Gcc/Acc|p.Ala288Thr/c.862G>A|338|ansA|protein_coding|CODING|ACT39397|1|1),upstream_gene_variant(MODIFIER||166||213|pncA|protein_coding|CODING|ACT39398||1),upstream_gene_variant(MODIFIER||4761||653|topB|protein_coding|CODING|ACT39393||1),upstream_gene_variant(MODIFIER||3713||347|selD|protein_coding|CODING|ACT39394||1),upstream_gene_variant(MODIFIER||3045||183…	89	46	COG0252	EJ	NO	1828088	1829104	+	G862A	-381.19	-380.5	6.40398e-11	3.88483e-11	211.16	228.18	0.5253	0.0118	832-881	0.8106	0.9476	832-881	0.782	0.99512	0.983444
1830836	C	CCC	INS	frameshift_variant	HIGH	atg/atGGg	p.Met124_Gly125fs/c.371_372insGG	ydjE	EFF=frameshift_variant(HIGH||atg/atGGg|p.Met124_Gly125fs/c.371_372insGG|452|ydjE|protein_coding|CODING|ACT39399|1|1),upstream_gene_variant(MODIFIER||4933||183|ydjA|protein_coding|CODING|ACT39395||1),downstream_gene_variant(MODIFIER||488||252|ydjF|protein_coding|CODING|ACT39400||1|WARNING_TRANSCRIPT_NO_START_CODON),downstream_gene_variant(MODIFIER||1383||326|ydjG|protein_coding|CODING|ACT39401||1)…	6	34	COG0477	GEPR	NO	.	.	.	.	.	.	.	.	.	.	.	.	.	.	.	.	.	.	.
1844432	T	C	SNP	missense_variant	MODERATE	cTg/cCg	p.Leu57Pro/c.170T>C	yeaG	EFF=missense_variant(MODERATE|MISSENSE|cTg/cCg|p.Leu57Pro/c.170T>C|602|yeaG|protein_coding|CODING|ACT39413|1|1),upstream_gene_variant(MODIFIER||4774||137|yeaA|protein_coding|CODING|ACT39408||1),upstream_gene_variant(MODIFIER||1752||427|yeaH|protein_coding|CODING|ACT39414||1),upstream_gene_variant(MODIFIER||3182||491|yeaI|protein_coding|CODING|ACT39415||1),upstream_gene_variant(MODIFIER||1567||284…	2	290	COG2766	T	NO	1844263	1846071	+	T170C	-681.45	-683.53	2.87727e-18	7.1573e-18	554.91	420.16	0.4973	0	162-211	0.9987	1	162-211	0.9976	0.999554	0.987529
1849198	G	A	SNP	upstream_gene_variant	MODIFIER	.	.	.	EFF=upstream_gene_variant(MODIFIER||72||496|yeaJ|protein_coding|CODING|ACT39416||1),upstream_gene_variant(MODIFIER||1605||167|yeaK|protein_coding|CODING|ACT39417||1),upstream_gene_variant(MODIFIER||2383||148|yeaL|protein_coding|CODING|ACT39419||1),upstream_gene_variant(MODIFIER||3704||393|yeaN|protein_coding|CODING|ACT39421||1),upstream_gene_variant(MODIFIER||4940||115|yeaO|protein_coding|CODING|…	.	.	NA	NA	.	.	.	.	.	.	.	.	.	.	.	.	.	.	.	.	.	.	.	.
1851089	C	T	SNP	missense_variant	MODERATE	cCg/cTg	p.Pro96Leu/c.287C>T	yeaK	EFF=missense_variant(MODERATE|MISSENSE|cCg/cTg|p.Pro96Leu/c.287C>T|167|yeaK|protein_coding|CODING|ACT39417|1|1),upstream_gene_variant(MODIFIER||492||148|yeaL|protein_coding|CODING|ACT39419||1),upstream_gene_variant(MODIFIER||1813||393|yeaN|protein_coding|CODING|ACT39421||1),upstream_gene_variant(MODIFIER||3049||115|yeaO|protein_coding|CODING|ACT39422||1),upstream_gene_variant(MODIFIER||3855||341|…	82	87	COG2606	S	NO	1850803	1851306	+	C287T	-181	-183.46	4.40376e-06	1.16481e-06	73.25	72.58	0.5137	0.1135	273-322	0.2501	0.6623	273-322	0.3971	0.964206	0.961956
1859307	A	G	SNP	missense_variant	MODERATE	Tgg/Cgg	p.Trp11Arg/c.31T>C	yeaS	EFF=missense_variant(MODERATE|MISSENSE|Tgg/Cgg|p.Trp11Arg/c.31T>C|212|yeaS|protein_coding|CODING|ACT39429|1|1|WARNING_TRANSCRIPT_NO_START_CODON),upstream_gene_variant(MODIFIER||4546||84|yoaF|protein_coding|CODING|ACT39423||1),upstream_gene_variant(MODIFIER||1183||361|yeaU|protein_coding|CODING|ACT39431||1),upstream_gene_variant(MODIFIER||2823||82|yeaQ|protein_coding|CODING|ACT39425||1),upstream_g…	104	49	COG1280	E	NO	1858699	1859337	-	T31C	-219.06	-221.14	1.0105e-09	1.02013e-09	125.73	123.84	0.4719	0.0001	29-203	0.9934	0.9995	30-159	0.9816	0.99133	0.988371
1869128	T	TT	INS	upstream_gene_variant	MODIFIER	.	.	.	EFF=upstream_gene_variant(MODIFIER||2560||375|rnd|protein_coding|CODING|ACT39435||1),upstream_gene_variant(MODIFIER||2816||114|yoaB|protein_coding|CODING|ACT39440||1),upstream_gene_variant(MODIFIER||3523||119|yoaC|protein_coding|CODING|ACT39441||1),upstream_gene_variant(MODIFIER||805||561|fadD|protein_coding|CODING|ACT39436||1),upstream_gene_variant(MODIFIER||4255||453|pabB|protein_coding|CODING|…	.	.	NA	NA	.	.	.	.	.	.	.	.	.	.	.	.	.	.	.	.	.	.	.	.
1872808	A	G	SNP	missense_variant	MODERATE	Atc/Gtc	p.Ile53Val/c.157A>G	yoaC	EFF=missense_variant(MODERATE|MISSENSE|Atc/Gtc|p.Ile53Val/c.157A>G|119|yoaC|protein_coding|CODING|ACT39441|1|1),upstream_gene_variant(MODIFIER||4484||561|fadD|protein_coding|CODING|ACT39436||1),upstream_gene_variant(MODIFIER||576||453|pabB|protein_coding|CODING|ACT39443||1),upstream_gene_variant(MODIFIER||3698||193|yeaY|protein_coding|CODING|ACT39437||1),upstream_gene_variant(MODIFIER||1941||192|…	21	170	NA	NA	NO	1872652	1873011	+	A157G	-97.6	-101.64	0.000211807	0.00204182	81.78	52.44	0.4146	0.0502	128-178	0.4718	0.5902	127-191	0.3371	0.95239	0.960487
1878868	T	C	SNP	missense_variant	MODERATE	Act/Gct	p.Thr433Ala/c.1297A>G	yoaE	EFF=missense_variant(MODERATE|MISSENSE|Act/Gct|p.Thr433Ala/c.1297A>G|518|yoaE|protein_coding|CODING|ACT39447|1|1),upstream_gene_variant(MODIFIER||1759||323|manX|protein_coding|CODING|ACT39448||1|WARNING_TRANSCRIPT_NO_START_CODON),upstream_gene_variant(MODIFIER||2793||266|manY|protein_coding|CODING|ACT39449||1),upstream_gene_variant(MODIFIER||3597||286|manZ|protein_coding|CODING|ACT39450||1|WARNIN…	28	44	COG0861	P	NO	1878608	1880164	-	C1133T-A1297G	-699.91	-698.17	2.90946e-18	1.76006e-18	189.94	191.57	0.5699	0.0524	933-1151	0.4841	0.7647	1078-1179	0.498	0.90889	0.924495
1879032	G	A	SNP	missense_variant	MODERATE	aCc/aTc	p.Thr378Ile/c.1133C>T	yoaE	EFF=missense_variant(MODERATE|MISSENSE|aCc/aTc|p.Thr378Ile/c.1133C>T|518|yoaE|protein_coding|CODING|ACT39447|1|1),upstream_gene_variant(MODIFIER||1595||323|manX|protein_coding|CODING|ACT39448||1|WARNING_TRANSCRIPT_NO_START_CODON),upstream_gene_variant(MODIFIER||2629||266|manY|protein_coding|CODING|ACT39449||1),upstream_gene_variant(MODIFIER||3433||286|manZ|protein_coding|CODING|ACT39450||1|WARNIN…	28	44	COG0861	P	NO	1878608	1880164	-	C1133T-A1297G	-699.91	-698.17	2.90946e-18	1.76006e-18	189.94	191.57	0.5699	0.0524	933-1151	0.4841	0.7647	1078-1179	0.498	0.90889	0.924495
1882202	G	A	SNP	missense_variant	MODERATE	gGt/gAt	p.Gly181Asp/c.542G>A	manY	EFF=missense_variant(MODERATE|MISSENSE|gGt/gAt|p.Gly181Asp/c.542G>A|266|manY|protein_coding|CODING|ACT39449|1|1),upstream_gene_variant(MODIFIER||263||286|manZ|protein_coding|CODING|ACT39450||1|WARNING_TRANSCRIPT_NO_START_CODON),upstream_gene_variant(MODIFIER||1178||152|yobD|protein_coding|CODING|ACT39451||1),upstream_gene_variant(MODIFIER||2065||188|yebN|protein_coding|CODING|ACT39452||1),upstrea…	302	857	COG3715	G	NO	1881661	1882461	+	G542A	-329.51	-329.44	1.26463e-08	6.60511e-08	130.76	120.58	0.5137	0.0554	507-564	0.468	0.7121	512-561	0.4431	0.852855	0.84136
1883365	TT	T	DEL	upstream_gene_variant	MODIFIER	.	.	.	EFF=upstream_gene_variant(MODIFIER||14||152|yobD|protein_coding|CODING|ACT39451||1),upstream_gene_variant(MODIFIER||901||188|yebN|protein_coding|CODING|ACT39452||1),upstream_gene_variant(MODIFIER||3202||518|yoaE|protein_coding|CODING|ACT39447||1),upstream_gene_variant(MODIFIER||4137||79|ECB_01797|protein_coding|CODING|ACT39458||1),downstream_gene_variant(MODIFIER||4762||532|yoaD|protein_coding|CO…	.	.	NA	NA	.	.	.	.	.	.	.	.	.	.	.	.	.	.	.	.	.	.	.	.
1884802	T	C	SNP	missense_variant	MODERATE	gTc/gCc	p.Val179Ala/c.536T>C	yebN	EFF=missense_variant(MODERATE|MISSENSE|gTc/gCc|p.Val179Ala/c.536T>C|188|yebN|protein_coding|CODING|ACT39452|1|1),upstream_gene_variant(MODIFIER||4638||518|yoaE|protein_coding|CODING|ACT39447||1),upstream_gene_variant(MODIFIER||2701||79|ECB_01797|protein_coding|CODING|ACT39458||1),upstream_gene_variant(MODIFIER||4051||457|yebQ|protein_coding|CODING|ACT39460||1),downstream_gene_variant(MODIFIER||28…	55	40	COG1971	S	NO	1884267	1884833	+	T536C	-235.99	-231.71	1.35376e-06	5.10255e-07	129.46	105.78	0.5216	0.2487	504-553	0.0668	-0.2225	515-565	0.0319	0.890957	0.770686
1887388	C	T	SNP	upstream_gene_variant	MODIFIER	.	.	.	EFF=upstream_gene_variant(MODIFIER||115||79|ECB_01797|protein_coding|CODING|ACT39458||1),upstream_gene_variant(MODIFIER||1465||457|yebQ|protein_coding|CODING|ACT39460||1),upstream_gene_variant(MODIFIER||1749||269|rrmA|protein_coding|CODING|ACT39453||1),upstream_gene_variant(MODIFIER||1374||69|cspC|protein_coding|CODING|ACT39454||1),upstream_gene_variant(MODIFIER||1218||47|yobF|protein_coding|CODI…	.	.	NA	NA	.	.	.	.	.	.	.	.	.	.	.	.	.	.	.	.	.	.	.	.
1887501	T	C	SNP	upstream_gene_variant	MODIFIER	.	.	.	EFF=upstream_gene_variant(MODIFIER||2||79|ECB_01797|protein_coding|CODING|ACT39458||1),upstream_gene_variant(MODIFIER||1352||457|yebQ|protein_coding|CODING|ACT39460||1),upstream_gene_variant(MODIFIER||1862||269|rrmA|protein_coding|CODING|ACT39453||1),upstream_gene_variant(MODIFIER||1487||69|cspC|protein_coding|CODING|ACT39454||1),upstream_gene_variant(MODIFIER||1331||47|yobF|protein_coding|CODING…	.	.	NA	NA	.	.	.	.	.	.	.	.	.	.	.	.	.	.	.	.	.	.	.	.
1889783	A	G	SNP	missense_variant	MODERATE	Aca/Gca	p.Thr311Ala/c.931A>G	yebQ	EFF=missense_variant(MODERATE|MISSENSE|Aca/Gca|p.Thr311Ala/c.931A>G|457|yebQ|protein_coding|CODING|ACT39460|1|1),upstream_gene_variant(MODIFIER||4144||269|rrmA|protein_coding|CODING|ACT39453||1),upstream_gene_variant(MODIFIER||3769||69|cspC|protein_coding|CODING|ACT39454||1),upstream_gene_variant(MODIFIER||3613||47|yobF|protein_coding|CODING|ACT39455||1),upstream_gene_variant(MODIFIER||2657||95|y…	4	25	COG0477	GEPR	NO	1888853	1890226	+	A931G	-539.24	-542.23	4.45148e-16	4.47078e-16	395.56	361.08	0.5087	0.0057	917-976	0.8928	0.9814	788-930	0.8828	0.879282	0.863895
1895222	C	CCCCC	INS	frameshift_variant	HIGH	ctc/cCCCCtc	p.Leu130_Ile131fs/c.389_390insCCCC	yebS	EFF=frameshift_variant(HIGH||ctc/cCCCCtc|p.Leu130_Ile131fs/c.389_390insCCCC|427|yebS|protein_coding|CODING|ACT39465|1|1),upstream_gene_variant(MODIFIER||864||877|yebT|protein_coding|CODING|ACT39466||1),upstream_gene_variant(MODIFIER||4070||293|htpX|protein_coding|CODING|ACT39461||1),upstream_gene_variant(MODIFIER||1830||682|prc|protein_coding|CODING|ACT39462||1),upstream_gene_variant(MODIFIER||35…	33	44	COG2995	S	NO	.	.	.	.	.	.	.	.	.	.	.	.	.	.	.	.	.	.	.
1900146	G	A	SNP	synonymous_variant	LOW	ccG/ccA	p.Pro449Pro/c.1347G>A	yebU	EFF=synonymous_variant(LOW|SILENT|ccG/ccA|p.Pro449Pro/c.1347G>A|479|yebU|protein_coding|CODING|ACT39467|1|1|WARNING_TRANSCRIPT_NO_START_CODON),upstream_gene_variant(MODIFIER||211||78|yebV|protein_coding|CODING|ACT39468||1),upstream_gene_variant(MODIFIER||552||63|yebW|protein_coding|CODING|ACT39469||1),upstream_gene_variant(MODIFIER||3538||76|holE|protein_coding|CODING|ACT39474||1),upstream_gene_v…	81	32	COG0144	J	NO	1898800	1900239	+	G1347A	-563.81	-563.96	5.87622e-17	8.23673e-17	164.85	150.88	0.5306	0.0119	1340-1389	0.8072	0.9843	1343-1392	0.8884	0.998113	0.986433
1900762	T	C	SNP	missense_variant	MODERATE	gTc/gCc	p.Val22Ala/c.65T>C	yebW	EFF=missense_variant(MODERATE|MISSENSE|gTc/gCc|p.Val22Ala/c.65T>C|63|yebW|protein_coding|CODING|ACT39469|1|1),upstream_gene_variant(MODIFIER||2922||76|holE|protein_coding|CODING|ACT39474||1),upstream_gene_variant(MODIFIER||3254||218|yobB|protein_coding|CODING|ACT39475||1),upstream_gene_variant(MODIFIER||3934||220|exoX|protein_coding|CODING|ACT39476||1),downstream_gene_variant(MODIFIER||128||218|p…	71	126	NA	NA	NO	1900698	1900889	+	T65C	-61.64	-64.97	0.0017758	0.00434028	33.14	23.48	0.4531	0.2248	40-167	0.0705	0.258	41-135	0.1461	0.629951	0.30218
1912688	C	T	SNP	missense_variant	MODERATE	Gcc/Acc	p.Ala165Thr/c.493G>A	edd	EFF=missense_variant(MODERATE|MISSENSE|Gcc/Acc|p.Ala165Thr/c.493G>A|603|edd|protein_coding|CODING|ACT39483|1|1),upstream_gene_variant(MODIFIER||4405||219|yebE|protein_coding|CODING|ACT39478||1),upstream_gene_variant(MODIFIER||3710||122|yebF|protein_coding|CODING|ACT39479||1),upstream_gene_variant(MODIFIER||3365||96|yebG|protein_coding|CODING|ACT39480||1),upstream_gene_variant(MODIFIER||2540||289|…	90	43	COG3147	S	NO	1911369	1913180	-	A138G-G493A	-758.81	-758.29	3.17942e-21	3.06272e-21	310.95	322.31	0.5296	0.0549	481-631	0.4698	0.8528	488-624	0.6042	0.719994	0.53223
1913043	T	C	SNP	synonymous_variant	LOW	gcA/gcG	p.Ala46Ala/c.138A>G	edd	EFF=synonymous_variant(LOW|SILENT|gcA/gcG|p.Ala46Ala/c.138A>G|603|edd|protein_coding|CODING|ACT39483|1|1),upstream_gene_variant(MODIFIER||4760||219|yebE|protein_coding|CODING|ACT39478||1),upstream_gene_variant(MODIFIER||4065||122|yebF|protein_coding|CODING|ACT39479||1),upstream_gene_variant(MODIFIER||3720||96|yebG|protein_coding|CODING|ACT39480||1),upstream_gene_variant(MODIFIER||2185||289|yebK|p…	90	43	COG3147	S	NO	1911369	1913180	-	A138G-G493A	-758.81	-758.29	3.17942e-21	3.06272e-21	310.95	322.31	0.5296	0.0549	481-631	0.4698	0.8528	488-624	0.6042	0.719994	0.53223
1914131	C	T	SNP	missense_variant	MODERATE	Gac/Aac	p.Asp254Asn/c.760G>A	zwf	EFF=missense_variant(MODERATE|MISSENSE|Gac/Aac|p.Asp254Asn/c.760G>A|491|zwf|protein_coding|CODING|ACT39484|1|1),upstream_gene_variant(MODIFIER||4808||96|yebG|protein_coding|CODING|ACT39480||1),upstream_gene_variant(MODIFIER||1097||289|yebK|protein_coding|CODING|ACT39485||1),upstream_gene_variant(MODIFIER||2094||480|pykA|protein_coding|CODING|ACT39486||1),upstream_gene_variant(MODIFIER||2799||213|…	NA	NA	COG0364	G	NO	1913415	1914890	-	A234G-G760A	-587.22	-587.22	7.15855e-15	7.02413e-15	283.4	288.56	0.521	0.0153	430-774	0.7723	0.9476	460-612	0.7838	0.989629	0.971475
1914657	T	C	SNP	synonymous_variant	LOW	ttA/ttG	p.Leu78Leu/c.234A>G	zwf	EFF=synonymous_variant(LOW|SILENT|ttA/ttG|p.Leu78Leu/c.234A>G|491|zwf|protein_coding|CODING|ACT39484|1|1),upstream_gene_variant(MODIFIER||571||289|yebK|protein_coding|CODING|ACT39485||1),upstream_gene_variant(MODIFIER||1568||480|pykA|protein_coding|CODING|ACT39486||1),upstream_gene_variant(MODIFIER||3325||213|eda|protein_coding|CODING|ACT39482||1),upstream_gene_variant(MODIFIER||1477||603|edd|pro…	NA	NA	COG0364	G	NO	1913415	1914890	-	A234G-G760A	-587.22	-587.22	7.15855e-15	7.02413e-15	283.4	288.56	0.521	0.0153	430-774	0.7723	0.9476	460-612	0.7838	0.989629	0.971475
1917335	T	C	SNP	missense_variant	MODERATE	Tac/Cac	p.Tyr371His/c.1111T>C	pykA	EFF=missense_variant(MODERATE|MISSENSE|Tac/Cac|p.Tyr371His/c.1111T>C|480|pykA|protein_coding|CODING|ACT39486|1|1),upstream_gene_variant(MODIFIER||4155||603|edd|protein_coding|CODING|ACT39483||1),upstream_gene_variant(MODIFIER||2445||491|zwf|protein_coding|CODING|ACT39484||1),upstream_gene_variant(MODIFIER||3903||251|znuC|protein_coding|CODING|ACT39490||1),upstream_gene_variant(MODIFIER||4655||261…	85	151	COG0469	G	NO	1916225	1917667	+	T1111C	-605.1	-607.95	2.39944e-16	4.93451e-16	305.1	244.51	0.5461	0.1209	935-986	0.2319	0.6137	996-1045	0.357	0.994065	0.975039
1925728	G	A	SNP	missense_variant	MODERATE	gCc/gTc	p.Ala140Val/c.419C>T	ruvC	EFF=missense_variant(MODERATE|MISSENSE|gCc/gTc|p.Ala140Val/c.419C>T|173|ruvC|protein_coding|CODING|ACT39495|1|1),upstream_gene_variant(MODIFIER||4569||310|znuA|protein_coding|CODING|ACT39489||1),upstream_gene_variant(MODIFIER||1602||336|ruvB|protein_coding|CODING|ACT39492||1),upstream_gene_variant(MODIFIER||3874||188|yecD|protein_coding|CODING|ACT39499||1),upstream_gene_variant(MODIFIER||982||203…	219	38	COG0817	L	NO	1925625	1926146	-	C419T	-243.19	-242.42	5.61722e-06	2.86972e-06	114.36	113.83	0.5855	0.0112	386-435	0.8231	0.9641	367-419	0.8277	0.996394	0.996984
1927374	A	G	SNP	missense_variant	MODERATE	gTt/gCt	p.Val10Ala/c.29T>C	ntpA	EFF=missense_variant(MODERATE|MISSENSE|gTt/gCt|p.Val10Ala/c.29T>C|150|ntpA|protein_coding|CODING|ACT39497|1|1|WARNING_TRANSCRIPT_NO_START_CODON),upstream_gene_variant(MODIFIER||3248||336|ruvB|protein_coding|CODING|ACT39492||1),upstream_gene_variant(MODIFIER||2228||188|yecD|protein_coding|CODING|ACT39499||1),upstream_gene_variant(MODIFIER||2628||203|ruvA|protein_coding|CODING|ACT39493||1|WARNING_T…	456	105	COG0494	LR	NO	1926950	1927402	-	T29C	-199.53	-194.92	8.39473e-06	8.13842e-06	80.94	81.27	0.524	0.0201	22-71	0.6878	0.8696	22-72	0.5898	0.986093	0.996518
1928945	G	A	SNP	synonymous_variant	LOW	aaC/aaT	p.Asn116Asn/c.348C>T	aspS	EFF=synonymous_variant(LOW|SILENT|aaC/aaT|p.Asn116Asn/c.348C>T|590|aspS|protein_coding|CODING|ACT39498|1|1),upstream_gene_variant(MODIFIER||4819||336|ruvB|protein_coding|CODING|ACT39492||1),upstream_gene_variant(MODIFIER||657||188|yecD|protein_coding|CODING|ACT39499||1),upstream_gene_variant(MODIFIER||4199||203|ruvA|protein_coding|CODING|ACT39493||1|WARNING_TRANSCRIPT_NO_START_CODON),upstream_gen…	440	125	COG0173	J	YES	1927520	1929292	-	C348T	-736.94	-736.94	1.03484e-17	1.11245e-17	337.3	336.97	0.5686	0.0007	152-382	0.9818	0.9983	158-366	0.9725	0.999723	0.997946
1929817	G	A	SNP	synonymous_variant	LOW	gcG/gcA	p.Ala72Ala/c.216G>A	yecD	EFF=synonymous_variant(LOW|SILENT|gcG/gcA|p.Ala72Ala/c.216G>A|188|yecD|protein_coding|CODING|ACT39499|1|1),upstream_gene_variant(MODIFIER||348||272|yecE|protein_coding|CODING|ACT39500||1),upstream_gene_variant(MODIFIER||1219||131|yecN|protein_coding|CODING|ACT39501||1),upstream_gene_variant(MODIFIER||3671||173|ruvC|protein_coding|CODING|ACT39495||1),upstream_gene_variant(MODIFIER||1655||247|yecO|…	68	76	COG1335	Q	NO	1929602	1930168	+	G216A	-226.07	-223.05	7.01491e-07	3.5489e-06	109.79	188.01	0.5312	0.2533	159-219	0.0661	-0.0503	143-203	0.0668	0.862081	0.744378
1937375	T	C	SNP	missense_variant	MODERATE	cAc/cGc	p.His119Arg/c.356A>G	cutC	EFF=missense_variant(MODERATE|MISSENSE|cAc/cGc|p.His119Arg/c.356A>G|146|cutC|protein_coding|CODING|ACT39506|1|1),upstream_gene_variant(MODIFIER||1457||577|argS|protein_coding|CODING|ACT39508||1|WARNING_TRANSCRIPT_NO_START_CODON),upstream_gene_variant(MODIFIER||3367||162|yecT|protein_coding|CODING|ACT39509||1|WARNING_TRANSCRIPT_NO_START_CODON),upstream_gene_variant(MODIFIER||1598||809|torZ|protein…	47	59	COG3142	P	NO	1937290	1937730	-	A356G	-165.52	-165.86	0.00010642	9.43505e-05	74.56	98.71	0.5105	0.0002	337-386	0.9935	0.9993	337-386	0.9862	0.999847	0.997205
1943000	T	A	SNP	missense_variant	MODERATE	gAt/gTt	p.Asp274Val/c.821A>T	flhA	EFF=missense_variant(MODERATE|MISSENSE|gAt/gTt|p.Asp274Val/c.821A>T|692|flhA|protein_coding|CODING|ACT39511|1|1),upstream_gene_variant(MODIFIER||4384||188|yecM|protein_coding|CODING|ACT39507||1),upstream_gene_variant(MODIFIER||1282||122|flhE|protein_coding|CODING|ACT39510||1),downstream_gene_variant(MODIFIER||813||382|flhB|protein_coding|CODING|ACT39512||1|WARNING_TRANSCRIPT_NO_START_CODON),downs…	2	28	COG1298	NU	NO	1941742	1943820	-	A821T	-911.18	-911.18	7.87152e-21	7.87719e-21	590.18	590.03	0.5786	0	797-847	1	1	721-779	0.9995	1	1
1945524	T	C	SNP	missense_variant	MODERATE	gAt/gGt	p.Asp95Gly/c.284A>G	cheZ	EFF=missense_variant(MODERATE|MISSENSE|gAt/gGt|p.Asp95Gly/c.284A>G|214|cheZ|protein_coding|CODING|ACT39513|1|1),upstream_gene_variant(MODIFIER||3806||122|flhE|protein_coding|CODING|ACT39510||1),upstream_gene_variant(MODIFIER||1704||692|flhA|protein_coding|CODING|ACT39511||1),upstream_gene_variant(MODIFIER||563||382|flhB|protein_coding|CODING|ACT39512||1|WARNING_TRANSCRIPT_NO_START_CODON),downstre…	1	31	COG3143	NT	NO	1945163	1945807	-	A284G	-273.9	-274.16	9.45171e-07	1.12619e-06	141.96	179.31	0.5536	0.0052	249-298	0.9014	0.9766	251-300	0.8657	0.993025	0.99273
1947565	T	C	SNP	synonymous_variant	LOW	ggA/ggG	p.Gly190Gly/c.570A>G	cheR	EFF=synonymous_variant(LOW|SILENT|ggA/ggG|p.Gly190Gly/c.570A>G|286|cheR|protein_coding|CODING|ACT39516|1|1),upstream_gene_variant(MODIFIER||3745||692|flhA|protein_coding|CODING|ACT39511||1),upstream_gene_variant(MODIFIER||2604||382|flhB|protein_coding|CODING|ACT39512||1|WARNING_TRANSCRIPT_NO_START_CODON),upstream_gene_variant(MODIFIER||1758||214|cheZ|protein_coding|CODING|ACT39513||1),upstream_ge…	0	28	COG1352	NT	NO	1947274	1948134	-	A570G	-356.01	-355.46	7.3334e-11	3.361e-11	255.71	277.92	0.5461	0.0001	537-586	0.9978	0.9998	537-588	0.9933	0.997097	0.979861
1950434	T	C	SNP	missense_variant	MODERATE	gAt/gGt	p.Asp343Gly/c.1028A>G	tar	EFF=missense_variant(MODERATE|MISSENSE|gAt/gGt|p.Asp343Gly/c.1028A>G|553|tar|protein_coding|CODING|ACT39518|1|1),upstream_gene_variant(MODIFIER||4627||214|cheZ|protein_coding|CODING|ACT39513||1),upstream_gene_variant(MODIFIER||4227||129|cheY|protein_coding|CODING|ACT39514||1),upstream_gene_variant(MODIFIER||3163||349|cheB|protein_coding|CODING|ACT39515||1),upstream_gene_variant(MODIFIER||2300||28…	0	35	COG0840	NT	NO	1949800	1951461	-	A1028G	-658.06	-660.5	1.17845e-18	3.00635e-18	617.95	558.98	0.596	0.384	990-1039	0.0213	0.133	990-1039	0.1137	0.972224	0.977495
1955285	T	C	SNP	missense_variant	MODERATE	Act/Gct	p.Thr209Ala/c.625A>G	motA	EFF=missense_variant(MODERATE|MISSENSE|Act/Gct|p.Thr209Ala/c.625A>G|295|motA|protein_coding|CODING|ACT39522|1|1|WARNING_TRANSCRIPT_NO_START_CODON),upstream_gene_variant(MODIFIER||3824||553|tar|protein_coding|CODING|ACT39518||1),upstream_gene_variant(MODIFIER||3176||167|cheW|protein_coding|CODING|ACT39519||1),upstream_gene_variant(MODIFIER||2462||142|yecG|protein_coding|CODING|ACT39525||1),upstrea…	0	25	COG1291	N	NO	1955022	1955909	-	A625G	-360.66	-361	2.08231e-09	2.3839e-09	202.52	193.47	0.5287	0.0164	468-669	0.7605	0.8824	580-633	0.6559	0.998902	0.992106
1959502	T	C	SNP	synonymous_variant	LOW	gcA/gcG	p.Ala35Ala/c.105A>G	otsA	EFF=synonymous_variant(LOW|SILENT|gcA/gcG|p.Ala35Ala/c.105A>G|474|otsA|protein_coding|CODING|ACT39526|1|1),upstream_gene_variant(MODIFIER||4477||308|motB|protein_coding|CODING|ACT39521||1),upstream_gene_variant(MODIFIER||3593||295|motA|protein_coding|CODING|ACT39522||1|WARNING_TRANSCRIPT_NO_START_CODON),upstream_gene_variant(MODIFIER||2888||192|flhC|protein_coding|CODING|ACT39523||1),upstream_gen…	8	173	COG0380	G	NO	1958182	1959606	-	A105G	-549.18	-551.29	1.02372e-15	8.26308e-17	279.33	277.19	0.5279	0.2044	95-269	0.1078	0.3792	98-243	0.2147	0.93515	0.933759
1961831	G	A	SNP	synonymous_variant	LOW	ggC/ggT	p.Gly411Gly/c.1233C>T	araG	EFF=synonymous_variant(LOW|SILENT|ggC/ggT|p.Gly411Gly/c.1233C>T|504|araG|protein_coding|CODING|ACT39529|1|1),upstream_gene_variant(MODIFIER||4855||119|flhD|protein_coding|CODING|ACT39524||1|WARNING_TRANSCRIPT_NO_START_CODON),upstream_gene_variant(MODIFIER||2225||474|otsA|protein_coding|CODING|ACT39526||1),upstream_gene_variant(MODIFIER||3088||167|yecI|protein_coding|CODING|ACT39531||1),upstream_g…	1	19	COG1129	G	NO	1961549	1963063	-	C1233T	-641.69	-639.88	8.8576e-18	3.21886e-18	237.46	240.67	0.5237	0.0361	1194-1243	0.5881	0.9354	1200-1249	0.7558	0.996013	0.997826
1963116	G	A	SNP	upstream_gene_variant	MODIFIER	.	.	.	EFF=upstream_gene_variant(MODIFIER||3510||474|otsA|protein_coding|CODING|ACT39526||1),upstream_gene_variant(MODIFIER||1803||167|yecI|protein_coding|CODING|ACT39531||1),upstream_gene_variant(MODIFIER||2735||266|otsB|protein_coding|CODING|ACT39527||1|WARNING_TRANSCRIPT_NO_START_CODON),upstream_gene_variant(MODIFIER||3100||107|yecR|protein_coding|CODING|ACT39533||1),upstream_gene_variant(MODIFIER||1…	.	.	NA	NA	.	.	.	.	.	.	.	.	.	.	.	.	.	.	.	.	.	.	.	.
1963597	T	C	SNP	missense_variant	MODERATE	Acg/Gcg	p.Thr176Ala/c.526A>G	araF	EFF=missense_variant(MODERATE|MISSENSE|Acg/Gcg|p.Thr176Ala/c.526A>G|329|araF|protein_coding|CODING|ACT39530|1|1),upstream_gene_variant(MODIFIER||3991||474|otsA|protein_coding|CODING|ACT39526||1),upstream_gene_variant(MODIFIER||1322||167|yecI|protein_coding|CODING|ACT39531||1),upstream_gene_variant(MODIFIER||3216||266|otsB|protein_coding|CODING|ACT39527||1|WARNING_TRANSCRIPT_NO_START_CODON),upstre…	1	36	COG1879	G	NO	1963133	1964122	-	A526G	-386.82	-388.69	7.451e-12	1.36337e-11	235.05	265.95	0.5387	0.0326	516-565	0.6141	0.8641	468-517	0.627	0.989687	0.941909
1966834	T	C	SNP	missense_variant	MODERATE	Ttc/Ctc	p.Phe42Leu/c.124T>C	ftn	EFF=missense_variant(MODERATE|MISSENSE|Ttc/Ctc|p.Phe42Leu/c.124T>C|165|ftn|protein_coding|CODING|ACT39534|1|1),upstream_gene_variant(MODIFIER||841||403|tyrP|protein_coding|CODING|ACT39536||1|WARNING_TRANSCRIPT_NO_START_CODON),upstream_gene_variant(MODIFIER||3771||504|araG|protein_coding|CODING|ACT39529||1),upstream_gene_variant(MODIFIER||2712||329|araF|protein_coding|CODING|ACT39530||1),upstream_…	294	248	COG1528	P	NO	1966711	1967208	+	T124C	-135.64	-138.27	3.95245e-07	4.06749e-07	113.65	113.05	0.4383	0	102-151	0.9986	0.9999	102-151	0.9949	0.999986	0.99962
1967365	T	C	SNP	missense_variant	MODERATE	Acc/Gcc	p.Thr41Ala/c.121A>G	yecH	EFF=missense_variant(MODERATE|MISSENSE|Acc/Gcc|p.Thr41Ala/c.121A>G|79|yecH|protein_coding|CODING|ACT39535|1|1),upstream_gene_variant(MODIFIER||310||403|tyrP|protein_coding|CODING|ACT39536||1|WARNING_TRANSCRIPT_NO_START_CODON),upstream_gene_variant(MODIFIER||4302||504|araG|protein_coding|CODING|ACT39529||1),upstream_gene_variant(MODIFIER||3243||329|araF|protein_coding|CODING|ACT39530||1),upstream_…	7	54	NA	NA	NO	1967246	1967485	-	A121G	-79.02	-80.52	0.000882959	0.000915375	59.47	83.1	0.4667	0.1054	94-238	0.2359	0.1823	79-138	0.1184	0.833871	0.761818
1967507	T	C	SNP	upstream_gene_variant	MODIFIER	.	.	.	EFF=upstream_gene_variant(MODIFIER||168||403|tyrP|protein_coding|CODING|ACT39536||1|WARNING_TRANSCRIPT_NO_START_CODON),upstream_gene_variant(MODIFIER||4444||504|araG|protein_coding|CODING|ACT39529||1),upstream_gene_variant(MODIFIER||3385||329|araF|protein_coding|CODING|ACT39530||1),upstream_gene_variant(MODIFIER||1755||83|yecJ|protein_coding|CODING|ACT39532||1),upstream_gene_variant(MODIFIER||22|…	.	.	NA	NA	.	.	.	.	.	.	.	.	.	.	.	.	.	.	.	.	.	.	.	.
1970847	C	T	SNP	upstream_gene_variant	MODIFIER	.	.	.	EFF=upstream_gene_variant(MODIFIER||3362||79|yecH|protein_coding|CODING|ACT39535||1),upstream_gene_variant(MODIFIER||2480||91|insA-13|protein_coding|CODING|ACT39541||1|WARNING_TRANSCRIPT_NO_START_CODON),upstream_gene_variant(MODIFIER||2674||167|insB-13|protein_coding|CODING|ACT39542||1),upstream_gene_variant(MODIFIER||3179||219|yedU|protein_coding|CODING|ACT39543||1),upstream_gene_variant(MODIFIE…	.	.	NA	NA	.	.	.	.	.	.	.	.	.	.	.	.	.	.	.	.	.	.	.	.
1977653	C	CC	INS	frameshift_variant	HIGH	gcc/Cgcc	p.Ala60_Gly61fs/c.178_179insC	yedY	EFF=frameshift_variant(HIGH||gcc/Cgcc|p.Ala60_Gly61fs/c.178_179insC|334|yedY|protein_coding|CODING|ACT39547|1|1),upstream_gene_variant(MODIFIER||4449||169|uvrY|protein_coding|CODING|ACT39540||1|WARNING_TRANSCRIPT_NO_START_CODON),upstream_gene_variant(MODIFIER||828||211|yedZ|protein_coding|CODING|ACT39548||1),upstream_gene_variant(MODIFIER||1720||216|yodA|protein_coding|CODING|ACT39549||1),upstrea…	5	45	COG2041	R	NO	.	.	.	.	.	.	.	.	.	.	.	.	.	.	.	.	.	.	.
1987983	G	A	SNP	missense_variant	MODERATE	Gca/Aca	p.Ala1708Thr/c.5122G>A	yeeJ	EFF=missense_variant(MODERATE|MISSENSE|Gca/Aca|p.Ala1708Thr/c.5122G>A|2383|yeeJ|protein_coding|CODING|ACT39552|1|1),upstream_gene_variant(MODIFIER||3659||438|shiA|protein_coding|CODING|ACT39553||1)	2	20	COG2931	Q	NO	1982862	1990013	+	G5122A	-2680.06	-2678.39	1.41336e-74	4.36557e-75	2041.58	1979.86	0.5087	0.0114	5074-5135	0.817	0.8727	5094-5143	0.6404	0.999138	0.997697
1990039	T	C	SNP	upstream_gene_variant	MODIFIER	.	.	.	EFF=upstream_gene_variant(MODIFIER||1603||438|shiA|protein_coding|CODING|ACT39553||1),upstream_gene_variant(MODIFIER||3021||484|amn|protein_coding|CODING|ACT39554||1),upstream_gene_variant(MODIFIER||4818||238|yeeN|protein_coding|CODING|ACT39555||1|WARNING_TRANSCRIPT_NO_START_CODON),downstream_gene_variant(MODIFIER||26||2383|yeeJ|protein_coding|CODING|ACT39552||1),intergenic_region(MODIFIER|||||||…	.	.	NA	NA	.	.	.	.	.	.	.	.	.	.	.	.	.	.	.	.	.	.	.	.
1996282	A	G	SNP	missense_variant	MODERATE	aTg/aCg	p.Met522Thr/c.1565T>C	yeeO	EFF=missense_variant(MODERATE|MISSENSE|aTg/aCg|p.Met522Thr/c.1565T>C|547|yeeO|protein_coding|CODING|ACT39556|1|1),upstream_gene_variant(MODIFIER||1569|||asnU|tRNA|NON_CODING|ECB_t00035||1),upstream_gene_variant(MODIFIER||3978|||asnV|tRNA|NON_CODING|ECB_t00036||1),upstream_gene_variant(MODIFIER||180|||asnW|tRNA|NON_CODING|ECB_t00034||1),downstream_gene_variant(MODIFIER||3324||438|shiA|protein_codi…	2	48	COG0534	V	NO	1996203	1997846	-	A451G-T1565C	-668.13	-669.94	2.5772e-20	8.95238e-21	326.34	315.28	0.4943	0.0812	440-512	0.2859	0.7136	440-512	0.4106	0.987231
1997396	T	C	SNP	missense_variant	MODERATE	Act/Gct	p.Thr151Ala/c.451A>G	yeeO	EFF=missense_variant(MODERATE|MISSENSE|Act/Gct|p.Thr151Ala/c.451A>G|547|yeeO|protein_coding|CODING|ACT39556|1|1),upstream_gene_variant(MODIFIER||455|||asnU|tRNA|NON_CODING|ECB_t00035||1),upstream_gene_variant(MODIFIER||2864|||asnV|tRNA|NON_CODING|ECB_t00036||1),upstream_gene_variant(MODIFIER||1294|||asnW|tRNA|NON_CODING|ECB_t00034||1),downstream_gene_variant(MODIFIER||4438||438|shiA|protein_codin…	2	48	COG0534	V	NO	1996203	1997846	-	A451G-T1565C	-668.13	-669.94	2.5772e-20	8.95238e-21	326.34	315.28	0.4943	0.0812	440-512	0.2859	0.7136	440-512	0.4106	0.987231
2002251	A	G	SNP	missense_variant	MODERATE	Tgg/Cgg	p.Trp73Arg/c.217T>C	cobT	EFF=missense_variant(MODERATE|MISSENSE|Tgg/Cgg|p.Trp73Arg/c.217T>C|359|cobT|protein_coding|CODING|ACT39560|1|1),upstream_gene_variant(MODIFIER||4405||547|yeeO|protein_coding|CODING|ACT39556||1),upstream_gene_variant(MODIFIER||3337||316|cbl|protein_coding|CODING|ACT39557||1|WARNING_TRANSCRIPT_NO_START_CODON),upstream_gene_variant(MODIFIER||2318||305|nac|protein_coding|CODING|ACT39558||1),upstream_…	9	40	COG2038	H	NO	2001388	2002467	-	T217C	-457.75	-456.52	1.46019e-12	6.94043e-13	124.83	143.03	0.5237	0.0237	212-296	0.6888	0.954	219-278	0.7997	0.977756	0.976545
2002826	G	A	SNP	synonymous_variant	LOW	Ctg/Ttg	p.Leu133Leu/c.397C>T	cobS	EFF=synonymous_variant(LOW|SILENT|Ctg/Ttg|p.Leu133Leu/c.397C>T|247|cobS|protein_coding|CODING|ACT39561|1|1),upstream_gene_variant(MODIFIER||4980||547|yeeO|protein_coding|CODING|ACT39556||1),upstream_gene_variant(MODIFIER||3912||316|cbl|protein_coding|CODING|ACT39557||1|WARNING_TRANSCRIPT_NO_START_CODON),upstream_gene_variant(MODIFIER||2893||305|nac|protein_coding|CODING|ACT39558||1),upstream_gene…	3	26	COG0368	H	NO	2002479	2003222	-	C397T	-324.09	-324.09	9.47932e-10	1.03388e-09	124.36	106.9	0.5362	0.0196	489-549	0.7274	0.923	492-548	0.7298	0.994164	0.960552
2003870	T	C	SNP	upstream_gene_variant	MODIFIER	.	.	.	EFF=upstream_gene_variant(MODIFIER||4956||316|cbl|protein_coding|CODING|ACT39557||1|WARNING_TRANSCRIPT_NO_START_CODON),upstream_gene_variant(MODIFIER||3937||305|nac|protein_coding|CODING|ACT39558||1),upstream_gene_variant(MODIFIER||2547||310|erfK|protein_coding|CODING|ACT39559||1),upstream_gene_variant(MODIFIER||1403||359|cobT|protein_coding|CODING|ACT39560||1),upstream_gene_variant(MODIFIER||648…	.	.	NA	NA	.	.	.	.	.	.	.	.	.	.	.	.	.	.	.	.	.	.	.	.
2017730	G	GG	INS	upstream_gene_variant	MODIFIER	.	.	.	EFF=upstream_gene_variant(MODIFIER||4741||388|dacD|protein_coding|CODING|ACT39571||1),upstream_gene_variant(MODIFIER||2835||75|yeeD|protein_coding|CODING|ACT39573||1),upstream_gene_variant(MODIFIER||2267||16|hisL|protein_coding|CODING|ACT39578||1),upstream_gene_variant(MODIFIER||2463||299|hisG|protein_coding|CODING|ACT39579||1),upstream_gene_variant(MODIFIER||1763||352|yeeE|protein_coding|CODING|…	.	.	NA	NA	.	.	.	.	.	.	.	.	.	.	.	.	.	.	.	.	.	.	.	.
2023721	C	T	SNP	synonymous_variant	LOW	ggC/ggT	p.Gly84Gly/c.252C>T	hisB	EFF=synonymous_variant(LOW|SILENT|ggC/ggT|p.Gly84Gly/c.252C>T|355|hisB|protein_coding|CODING|ACT39582|1|1),upstream_gene_variant(MODIFIER||816||196|hisH|protein_coding|CODING|ACT39583||1),upstream_gene_variant(MODIFIER||4150||274|yeeZ|protein_coding|CODING|ACT39577||1),upstream_gene_variant(MODIFIER||1406||245|hisA|protein_coding|CODING|ACT39584||1),upstream_gene_variant(MODIFIER||2125||258|hisF|…	33	151	COG0241	E	NO	2023470	2024537	+	C252T	-437.28	-435.18	9.70898e-12	4.5873e-12	176.27	187.43	0.5287	0.0352	90-255	0.5945	0.9554	91-253	0.8033	0.934013	0.892193
2031171	G	A	SNP	synonymous_variant	LOW	aaC/aaT	p.Asn33Asn/c.99C>T	gnd	EFF=synonymous_variant(LOW|SILENT|aaC/aaT|p.Asn33Asn/c.99C>T|468|gnd|protein_coding|CODING|ACT39589|1|1),upstream_gene_variant(MODIFIER||2865||327|wzzB|protein_coding|CODING|ACT39587||1),upstream_gene_variant(MODIFIER||1556||388|ugd|protein_coding|CODING|ACT39588||1),downstream_gene_variant(MODIFIER||262||454|manB|protein_coding|CODING|ACT39590||1),downstream_gene_variant(MODIFIER||4549||258|hisF…	861	396	COG0362	G	NO	2029863	2031269	-	C99T	-551.92	-550.52	7.97595e-14	3.04289e-14	205.13	218.26	0.4783	0.0444	94-194	0.5037	0.7021	86-170	0.4196	0.997481	0.968884
2031315	A	G	SNP	upstream_gene_variant	MODIFIER	.	.	.	EFF=upstream_gene_variant(MODIFIER||3009||327|wzzB|protein_coding|CODING|ACT39587||1),upstream_gene_variant(MODIFIER||1700||388|ugd|protein_coding|CODING|ACT39588||1),upstream_gene_variant(MODIFIER||46||468|gnd|protein_coding|CODING|ACT39589||1),downstream_gene_variant(MODIFIER||118||454|manB|protein_coding|CODING|ACT39590||1),downstream_gene_variant(MODIFIER||4693||258|hisF|protein_coding|CODING…	.	.	NA	NA	.	.	.	.	.	.	.	.	.	.	.	.	.	.	.	.	.	.	.	.
2055436	G	A	SNP	synonymous_variant	LOW	Ctg/Ttg	p.Leu221Leu/c.661C>T	cpsG	EFF=synonymous_variant(LOW|SILENT|Ctg/Ttg|p.Leu221Leu/c.661C>T|456|cpsG|protein_coding|CODING|ACT39612|1|1),upstream_gene_variant(MODIFIER||3801||426|wcaK|protein_coding|CODING|ACT39609||1),upstream_gene_variant(MODIFIER||2161||492|wzxC|protein_coding|CODING|ACT39610||1),upstream_gene_variant(MODIFIER||765||464|wcaJ|protein_coding|CODING|ACT39611||1),downstream_gene_variant(MODIFIER||853||478|cps…	0	14	COG1109	G	NO	2054726	2056096	-	G615A-C661T	-581.22	-581.22	1.54346e-14	2.34691e-14	332.15	287.11	0.5436	0.3025	537-669	0.0427	-0.2269	543-592	0.0365	0.959161	0.879127
2055482	C	T	SNP	synonymous_variant	LOW	gtG/gtA	p.Val205Val/c.615G>A	cpsG	EFF=synonymous_variant(LOW|SILENT|gtG/gtA|p.Val205Val/c.615G>A|456|cpsG|protein_coding|CODING|ACT39612|1|1),upstream_gene_variant(MODIFIER||3847||426|wcaK|protein_coding|CODING|ACT39609||1),upstream_gene_variant(MODIFIER||2207||492|wzxC|protein_coding|CODING|ACT39610||1),upstream_gene_variant(MODIFIER||811||464|wcaJ|protein_coding|CODING|ACT39611||1),downstream_gene_variant(MODIFIER||807||478|cps…	0	14	COG1109	G	NO	2054726	2056096	-	G615A-C661T	-581.22	-581.22	1.54346e-14	2.34691e-14	332.15	287.11	0.5436	0.3025	537-669	0.0427	-0.2269	543-592	0.0365	0.959161	0.879127
2059498	A	G	SNP	missense_variant	MODERATE	Tca/Cca	p.Ser300Pro/c.898T>C	wcaG	EFF=missense_variant(MODERATE|MISSENSE|Tca/Cca|p.Ser300Pro/c.898T>C|321|wcaG|protein_coding|CODING|ACT39616|1|1),upstream_gene_variant(MODIFIER||4827||464|wcaJ|protein_coding|CODING|ACT39611||1),upstream_gene_variant(MODIFIER||3402||456|cpsG|protein_coding|CODING|ACT39612||1),upstream_gene_variant(MODIFIER||1773||478|cpsB|protein_coding|CODING|ACT39613||1),upstream_gene_variant(MODIFIER||547||407…	99	60	COG0451	MG	NO	2059430	2060395	-	A677G-T898C	-418.89	-419.44	5.31265e-12	4.76111e-12	224.6	264.38	0.5796	0.1284	619-677	0.2149	0.195	550-602	0.1339	0.7853	0.651439
2059719	T	C	SNP	missense_variant	MODERATE	gAg/gGg	p.Glu226Gly/c.677A>G	wcaG	EFF=missense_variant(MODERATE|MISSENSE|gAg/gGg|p.Glu226Gly/c.677A>G|321|wcaG|protein_coding|CODING|ACT39616|1|1),upstream_gene_variant(MODIFIER||3623||456|cpsG|protein_coding|CODING|ACT39612||1),upstream_gene_variant(MODIFIER||1994||478|cpsB|protein_coding|CODING|ACT39613||1),upstream_gene_variant(MODIFIER||768||407|wcaI|protein_coding|CODING|ACT39614||1),upstream_gene_variant(MODIFIER||292||159|…	99	60	COG0451	MG	NO	2059430	2060395	-	A677G-T898C	-418.89	-419.44	5.31265e-12	4.76111e-12	224.6	264.38	0.5796	0.1284	619-677	0.2149	0.195	550-602	0.1339	0.7853	0.651439
2077738	C	T	SNP	synonymous_variant	LOW	Ctg/Ttg	p.Leu423Leu/c.1267C>T	yegE	EFF=synonymous_variant(LOW|SILENT|Ctg/Ttg|p.Leu423Leu/c.1267C>T|1101|yegE|protein_coding|CODING|ACT39631|1|1),upstream_gene_variant(MODIFIER||2920||617|asmA|protein_coding|CODING|ACT39628||1),upstream_gene_variant(MODIFIER||2317||193|dcd|protein_coding|CODING|ACT39629||1),upstream_gene_variant(MODIFIER||3122||450|yegD|protein_coding|CODING|ACT39633||1|WARNING_TRANSCRIPT_NO_START_CODON),upstream_g…	5	37	COG3447	T	NO	2076472	2079777	+	C1267T	-1404.36	-1404.36	2.24172e-32	2.2682e-32	1004	1001.52	0.5012	0.0104	1268-1464	0.8292	0.9503	1397-1446	0.7905	0.999545	0.997462
2082547	G	A	SNP	missense_variant	MODERATE	gCa/gTa	p.Ala540Val/c.1619C>T	yegI	EFF=missense_variant(MODERATE|MISSENSE|gCa/gTa|p.Ala540Val/c.1619C>T|646|yegI|protein_coding|CODING|ACT39634|1|1),upstream_gene_variant(MODIFIER||1821||282|alkA|protein_coding|CODING|ACT39632||1),upstream_gene_variant(MODIFIER||4577||415|yegM|protein_coding|CODING|ACT39637||1),downstream_gene_variant(MODIFIER||1615||253|yegK|protein_coding|CODING|ACT39635||1|WARNING_TRANSCRIPT_NO_START_CODON),dow…	3	23	COG4248	R	NO	2082225	2084165	-	C1619T	-815.21	-813.58	1.27427e-20	4.48609e-21	275.52	457.78	0.5362	0.0161	1577-1801	0.7633	0.949	1588-1761	0.7871	0.986832	0.957738
2099500	C	T	SNP	synonymous_variant	LOW	atC/atT	p.Ile242Ile/c.726C>T	yegQ	EFF=synonymous_variant(LOW|SILENT|atC/atT|p.Ile242Ile/c.726C>T|453|yegQ|protein_coding|CODING|ACT39644|1|1),upstream_gene_variant(MODIFIER||3270||103|ECB_01990|protein_coding|CODING|ACT39648||1|WARNING_TRANSCRIPT_NO_START_CODON),upstream_gene_variant(MODIFIER||4234||71|ECB_01992|protein_coding|CODING|ACT39650||1),upstream_gene_variant(MODIFIER||4421||372|ECB_01993|protein_coding|CODING|ACT39651||…	305	79	COG0826	O	NO	2098775	2100136	+	C726T	-557.86	-555.64	5.41756e-15	3.16842e-15	241.03	244.54	0.5362	0.0349	688-737	0.597	0.9144	693-742	0.7129	0.996275	0.976934
2103918	G	GCCAGCCAGCCAGCCAG	INS	frameshift_variant	HIGH	agg/agCCAGCCAGCCAGCCAGg	p.Arg62_Cys63fs/c.186_187insCCAGCCAGCCAGCCAG	ECB_01992	EFF=frameshift_variant(HIGH||agg/agCCAGCCAGCCAGCCAGg|p.Arg62_Cys63fs/c.186_187insCCAGCCAGCCAGCCAG|71|ECB_01992|protein_coding|CODING|ACT39650|1|1),upstream_gene_variant(MODIFIER||2||372|ECB_01993|protein_coding|CODING|ACT39651||1|WARNING_TRANSCRIPT_NO_START_CODON),upstream_gene_variant(MODIFIER||3292||72|ogrK|protein_coding|CODING|ACT39645||1),upstream_gene_variant(MODIFIER||2431||259|yegZ|protei…	NA	NA	NA	NA	NO	.	.	.	.	.	.	.	.	.	.	.	.	.	.	.	.	.	.	.
2115782	T	TT	INS	frameshift_variant	HIGH	gat/gatA	p.Asp203_Lys204fs/c.609_610insA	ECB_02003	EFF=frameshift_variant(HIGH||gat/gatA|p.Asp203_Lys204fs/c.609_610insA|405|ECB_02003|protein_coding|CODING|ACT39661|1|1),upstream_gene_variant(MODIFIER||1110||655|ECB_02001|protein_coding|CODING|ACT39659||1),upstream_gene_variant(MODIFIER||745||121|ECB_02002|protein_coding|CODING|ACT39660||1|WARNING_TRANSCRIPT_NO_START_CODON),downstream_gene_variant(MODIFIER||4379||261|ECB_01999|protein_coding|COD…	NA	NA	NA	NA	NO	.	.	.	.	.	.	.	.	.	.	.	.	.	.	.	.	.	.	.
2116047	C	CC	INS	frameshift_variant	HIGH	atg/atGg	p.Met115_Gly116fs/c.344_345insG	ECB_02003	EFF=frameshift_variant(HIGH||atg/atGg|p.Met115_Gly116fs/c.344_345insG|405|ECB_02003|protein_coding|CODING|ACT39661|1|1),upstream_gene_variant(MODIFIER||1375||655|ECB_02001|protein_coding|CODING|ACT39659||1),upstream_gene_variant(MODIFIER||1010||121|ECB_02002|protein_coding|CODING|ACT39660||1|WARNING_TRANSCRIPT_NO_START_CODON),upstream_gene_variant(MODIFIER||4799||123|ECB_02011|protein_coding|CODI…	NA	NA	NA	NA	NO	.	.	.	.	.	.	.	.	.	.	.	.	.	.	.	.	.	.	.
2116119	A	G	SNP	synonymous_variant	LOW	gcT/gcC	p.Ala91Ala/c.273T>C	ECB_02003	EFF=synonymous_variant(LOW|SILENT|gcT/gcC|p.Ala91Ala/c.273T>C|405|ECB_02003|protein_coding|CODING|ACT39661|1|1),upstream_gene_variant(MODIFIER||1446||655|ECB_02001|protein_coding|CODING|ACT39659||1),upstream_gene_variant(MODIFIER||1081||121|ECB_02002|protein_coding|CODING|ACT39660||1|WARNING_TRANSCRIPT_NO_START_CODON),upstream_gene_variant(MODIFIER||4728||123|ECB_02011|protein_coding|CODING|ACT39…	NA	NA	NA	NA	NO	.	.	.	.	.	.	.	.	.	.	.	.	.	.	.	.	.	.	.
2122547	T	C	SNP	missense_variant	MODERATE	Acg/Gcg	p.Thr27Ala/c.79A>G	ECB_02013	EFF=missense_variant(MODERATE|MISSENSE|Acg/Gcg|p.Thr27Ala/c.79A>G|71|ECB_02013|protein_coding|CODING|ACT39671|1|1),upstream_gene_variant(MODIFIER||788||299|yegS|protein_coding|CODING|ACT39673||1),upstream_gene_variant(MODIFIER||3770||763|ECB_02004|protein_coding|CODING|ACT39662||1),upstream_gene_variant(MODIFIER||3514||91|ECB_02005|protein_coding|CODING|ACT39663||1),upstream_gene_variant(MODIFIER…	NA	NA	NA	NA	NO	2122410	2122625	-	A79G	-86.83	-86.31	0.00944441	0.00950248	23.81	23.81	0.463	0	68-117	1	1	79-137	0.9998	1	1
2126468	C	CC	INS	frameshift_variant	HIGH	gcc/gccG	p.Ala390_Gly391fs/c.1170_1171insG	gatC	EFF=frameshift_variant(HIGH||gcc/gccG|p.Ala390_Gly391fs/c.1170_1171insG|451|gatC|protein_coding|CODING|ACT39676|1|1),upstream_gene_variant(MODIFIER||3844||71|ECB_02013|protein_coding|CODING|ACT39671||1),upstream_gene_variant(MODIFIER||3539||105|yegR|protein_coding|CODING|ACT39672||1),upstream_gene_variant(MODIFIER||2186||91|insA-15|protein_coding|CODING|ACT39679||1|WARNING_TRANSCRIPT_NO_START_COD…	NA	NA	COG3775	G	NO	.	.	.	.	.	.	.	.	.	.	.	.	.	.	.	.	.	.	.
2134392	G	A	SNP	missense_variant	MODERATE	Gcc/Acc	p.Ala57Thr/c.169G>A	yegU	EFF=missense_variant(MODERATE|MISSENSE|Gcc/Acc|p.Ala57Thr/c.169G>A|334|yegU|protein_coding|CODING|ACT39684|1|1),upstream_gene_variant(MODIFIER||833||321|yegV|protein_coding|CODING|ACT39685||1),upstream_gene_variant(MODIFIER||3051||284|gatY|protein_coding|CODING|ACT39681||1),upstream_gene_variant(MODIFIER||1699||350|fbaB|protein_coding|CODING|ACT39682||1),downstream_gene_variant(MODIFIER||1772||24…	9	21	COG1397	O	NO	2134224	2135228	+	G169A	-439.11	-438.9	2.91306e-10	2.97753e-10	255.42	254.74	0.5312	0.0776	24-81	0.3532	0.5865	25-76	0.321	0.999421	0.994148
2140562	T	C	SNP	upstream_gene_variant	MODIFIER	.	.	.	EFF=upstream_gene_variant(MODIFIER||3652||248|yegW|protein_coding|CODING|ACT39686||1),upstream_gene_variant(MODIFIER||1823||132|ECB_02038|protein_coding|CODING|ACT39695||1),upstream_gene_variant(MODIFIER||2782||272|yegX|protein_coding|CODING|ACT39687||1),upstream_gene_variant(MODIFIER||1917||266|thiD|protein_coding|CODING|ACT39688||1),upstream_gene_variant(MODIFIER||1132||262|thiM|protein_coding|…	.	.	NA	NA	.	.	.	.	.	.	.	.	.	.	.	.	.	.	.	.	.	.	.	.
2161669	C	CC	INS	frameshift_variant	HIGH	gcc/Cgcc	p.Ala459_Cys460fs/c.1375_1376insC	yehQ	EFF=frameshift_variant(HIGH||gcc/Cgcc|p.Ala459_Cys460fs/c.1375_1376insC|666|yehQ|protein_coding|CODING|ACT39708|1|1),upstream_gene_variant(MODIFIER||751||153|yehR|protein_coding|CODING|ACT39709||1),upstream_gene_variant(MODIFIER||4393||243|yehV|protein_coding|CODING|ACT39713||1),downstream_gene_variant(MODIFIER||4790||362|yehL|protein_coding|CODING|ACT39705||1),downstream_gene_variant(MODIFIER||1…	NA	NA	NA	NA	NO	.	.	.	.	.	.	.	.	.	.	.	.	.	.	.	.	.	.	.
2163736	G	A	SNP	missense_variant	MODERATE	Cat/Tat	p.His142Tyr/c.424C>T	yehT	EFF=missense_variant(MODERATE|MISSENSE|Cat/Tat|p.His142Tyr/c.424C>T|239|yehT|protein_coding|CODING|ACT39711|1|1),upstream_gene_variant(MODIFIER||2327||243|yehV|protein_coding|CODING|ACT39713||1),upstream_gene_variant(MODIFIER||3118||35|ECB_02057|protein_coding|CODING|ACT39714||1),upstream_gene_variant(MODIFIER||343||156|yehS|protein_coding|CODING|ACT39710||1),downstream_gene_variant(MODIFIER||420…	40	50	COG3279	KT	NO	2163440	2164159	-	C424T	-272.1	-274.73	7.71278e-09	8.19399e-09	185.18	109.7	0.4763	0.1005	400-449	0.2244	0.8558	400-452	0.5866	0.989145	0.935267
2167350	C	T	SNP	synonymous_variant	LOW	ccG/ccA	p.Pro108Pro/c.324G>A	yehW	EFF=synonymous_variant(LOW|SILENT|ccG/ccA|p.Pro108Pro/c.324G>A|243|yehW|protein_coding|CODING|ACT39715|1|1),upstream_gene_variant(MODIFIER||3957||156|yehS|protein_coding|CODING|ACT39710||1),upstream_gene_variant(MODIFIER||3191||239|yehT|protein_coding|CODING|ACT39711||1),upstream_gene_variant(MODIFIER||1509||561|yehU|protein_coding|CODING|ACT39712||1),downstream_gene_variant(MODIFIER||328||308|ye…	1	30	COG1174	E	NO	2166942	2167673	-	G324A	-348.55	-348.42	8.51416e-08	1.48779e-07	207.71	70.13	0.586	0.1807	301-355	0.1292	-0.2683	299-348	0.0311	0.683887	0.63209
2175716	G	A	SNP	synonymous_variant	LOW	agC/agT	p.Ser131Ser/c.393C>T	pbpG	EFF=synonymous_variant(LOW|SILENT|agC/agT|p.Ser131Ser/c.393C>T|310|pbpG|protein_coding|CODING|ACT39721|1|1),upstream_gene_variant(MODIFIER||1323||192|yohD|protein_coding|CODING|ACT39723||1),upstream_gene_variant(MODIFIER||2489||765|bglX|protein_coding|CODING|ACT39719||1),downstream_gene_variant(MODIFIER||566||195|yohC|protein_coding|CODING|ACT39722||1),downstream_gene_variant(MODIFIER||2031||253|…	92	69	COG1686	M	NO	2175176	2176108	-	C393T	-366.18	-362.43	3.39374e-09	2.0698e-09	150.81	193.38	0.4938	0.2132	193-245	0.0615	-0.1945	523-588	0.0291	0.920999	0.884745
2176585	A	G	SNP	synonymous_variant	LOW	cgT/cgC	p.Arg95Arg/c.285T>C	yohC	EFF=synonymous_variant(LOW|SILENT|cgT/cgC|p.Arg95Arg/c.285T>C|195|yohC|protein_coding|CODING|ACT39722|1|1),upstream_gene_variant(MODIFIER||454||192|yohD|protein_coding|CODING|ACT39723||1),upstream_gene_variant(MODIFIER||3358||765|bglX|protein_coding|CODING|ACT39719||1),upstream_gene_variant(MODIFIER||477||310|pbpG|protein_coding|CODING|ACT39721||1),downstream_gene_variant(MODIFIER||1162||253|yohF…	1	68	COG0628	R	NO	2176282	2176869	-	T285C	-240.4	-242.22	8.03155e-07	9.63159e-07	149.19	130.96	0.5536	0.1244	293-342	0.2238	0.1454	283-340	0.1175	0.922534	0.936435
2184745	G	A	SNP	synonymous_variant	LOW	ccG/ccA	p.Pro210Pro/c.630G>A	sanA	EFF=synonymous_variant(LOW|SILENT|ccG/ccA|p.Pro210Pro/c.630G>A|239|sanA|protein_coding|CODING|ACT39730|1|1),upstream_gene_variant(MODIFIER||93||79|yeiS|protein_coding|CODING|ACT39731||1),upstream_gene_variant(MODIFIER||4820||454|yohGH|protein_coding|CODING|ACT39725||1),upstream_gene_variant(MODIFIER||526||412|yeiT|protein_coding|CODING|ACT39732||1),upstream_gene_variant(MODIFIER||1758||411|yeiA|p…	71	69	COG2949	S	NO	2184116	2184835	+	G630A	-258.46	-254.35	8.1675e-08	1.24633e-08	132.75	141.15	0.4948	0.1587	626-694	0.1384	0.472	621-670	0.2511	0.776324	0.687117
2185531	T	C	SNP	synonymous_variant	LOW	tgT/tgC	p.Cys87Cys/c.261T>C	yeiT	EFF=synonymous_variant(LOW|SILENT|tgT/tgC|p.Cys87Cys/c.261T>C|412|yeiT|protein_coding|CODING|ACT39732|1|1),upstream_gene_variant(MODIFIER||972||411|yeiA|protein_coding|CODING|ACT39733||1),upstream_gene_variant(MODIFIER||3907||315|yohI|protein_coding|CODING|ACT39726||1),downstream_gene_variant(MODIFIER||3271||132|yohJ|protein_coding|CODING|ACT39727||1),downstream_gene_variant(MODIFIER||2579||231|y…	2	25	COG0493	ER	NO	2185271	2186509	+	T261C	-492.42	-490.99	3.37655e-14	1.33279e-14	327.95	176.03	0.4988	0.079	241-371	0.2938	0.6622	254-307	0.3624	0.948166	0.894683
2192942	G	A	SNP	upstream_gene_variant	MODIFIER	.	.	.	EFF=upstream_gene_variant(MODIFIER||3951||336|mglC|protein_coding|CODING|ACT39734||1),upstream_gene_variant(MODIFIER||2206||278|yeiG|protein_coding|CODING|ACT39740||1),upstream_gene_variant(MODIFIER||2415||506|mglA|protein_coding|CODING|ACT39735||1),upstream_gene_variant(MODIFIER||1356||332|mglB|protein_coding|CODING|ACT39736||1),upstream_gene_variant(MODIFIER||36||346|galS|protein_coding|CODING|…	.	.	NA	NA	.	.	.	.	.	.	.	.	.	.	.	.	.	.	.	.	.	.	.	.
2193337	G	A	SNP	missense_variant	MODERATE	cCg/cTg	p.Pro290Leu/c.869C>T	yeiB	EFF=missense_variant(MODERATE|MISSENSE|cCg/cTg|p.Pro290Leu/c.869C>T|385|yeiB|protein_coding|CODING|ACT39738|1|1),upstream_gene_variant(MODIFIER||4346||336|mglC|protein_coding|CODING|ACT39734||1),upstream_gene_variant(MODIFIER||1811||278|yeiG|protein_coding|CODING|ACT39740||1),upstream_gene_variant(MODIFIER||2810||506|mglA|protein_coding|CODING|ACT39735||1),upstream_gene_variant(MODIFIER||1751||33…	19	56	COG2311	S	NO	2193048	2194205	-	T684C-C869T	-528.67	-529.51	1.23517e-12	2.3131e-12	262.91	399.72	0.5392	0.1002	652-737	0.2869	0.7225	661-728	0.4533	0.955942	0.966691
2193522	A	G	SNP	synonymous_variant	LOW	cgT/cgC	p.Arg228Arg/c.684T>C	yeiB	EFF=synonymous_variant(LOW|SILENT|cgT/cgC|p.Arg228Arg/c.684T>C|385|yeiB|protein_coding|CODING|ACT39738|1|1),upstream_gene_variant(MODIFIER||4531||336|mglC|protein_coding|CODING|ACT39734||1),upstream_gene_variant(MODIFIER||1626||278|yeiG|protein_coding|CODING|ACT39740||1),upstream_gene_variant(MODIFIER||2995||506|mglA|protein_coding|CODING|ACT39735||1),upstream_gene_variant(MODIFIER||1936||332|mgl…	19	56	COG2311	S	NO	2193048	2194205	-	T684C-C869T	-528.67	-529.51	1.23517e-12	2.3131e-12	262.91	399.72	0.5392	0.1002	652-737	0.2869	0.7225	661-728	0.4533	0.955942	0.966691
2195068	A	G	SNP	upstream_gene_variant	MODIFIER	.	.	.	EFF=upstream_gene_variant(MODIFIER||80||278|yeiG|protein_coding|CODING|ACT39740||1),upstream_gene_variant(MODIFIER||4541||506|mglA|protein_coding|CODING|ACT39735||1),upstream_gene_variant(MODIFIER||3482||332|mglB|protein_coding|CODING|ACT39736||1),upstream_gene_variant(MODIFIER||2162||346|galS|protein_coding|CODING|ACT39737||1),upstream_gene_variant(MODIFIER||863||385|yeiB|protein_coding|CODING|A…	.	.	NA	NA	.	.	.	.	.	.	.	.	.	.	.	.	.	.	.	.	.	.	.	.
2195256	CC	C	DEL	frameshift_variant	HIGH	cct/	p.Pro37fs/c.110delC	yeiG	EFF=frameshift_variant(HIGH||cct/|p.Pro37fs/c.110delC|278|yeiG|protein_coding|CODING|ACT39740|1|1),upstream_gene_variant(MODIFIER||4730||506|mglA|protein_coding|CODING|ACT39735||1),upstream_gene_variant(MODIFIER||3671||332|mglB|protein_coding|CODING|ACT39736||1),upstream_gene_variant(MODIFIER||2351||346|galS|protein_coding|CODING|ACT39737||1),upstream_gene_variant(MODIFIER||1052||385|yeiB|protein…	22	91	COG0627	R	NO	.	.	.	.	.	.	.	.	.	.	.	.	.	.	.	.	.	.	.
2198780	T	C	SNP	missense_variant	MODERATE	Aaa/Gaa	p.Lys331Glu/c.991A>G	lysP	EFF=missense_variant(MODERATE|MISSENSE|Aaa/Gaa|p.Lys331Glu/c.991A>G|489|lysP|protein_coding|CODING|ACT39742|1|1),upstream_gene_variant(MODIFIER||4575||385|yeiB|protein_coding|CODING|ACT39738||1),upstream_gene_variant(MODIFIER||3890||222|folE|protein_coding|CODING|ACT39739||1),upstream_gene_variant(MODIFIER||2175||349|yeiH|protein_coding|CODING|ACT39744||1),upstream_gene_variant(MODIFIER||3298||28…	159	101	COG0833	E	NO	2198301	2199770	-	A67G-A991G	-648.99	-649.43	1.08368e-14	1.63647e-14	322.96	450.52	0.5458	0.0907	62-114	0.3153	0.6573	61-113	0.3824	0.942708
2199704	T	C	SNP	missense_variant	MODERATE	Acg/Gcg	p.Thr23Ala/c.67A>G	lysP	EFF=missense_variant(MODERATE|MISSENSE|Acg/Gcg|p.Thr23Ala/c.67A>G|489|lysP|protein_coding|CODING|ACT39742|1|1),upstream_gene_variant(MODIFIER||4814||222|folE|protein_coding|CODING|ACT39739||1),upstream_gene_variant(MODIFIER||1251||349|yeiH|protein_coding|CODING|ACT39744||1),upstream_gene_variant(MODIFIER||2374||285|nfo|protein_coding|CODING|ACT39745||1),upstream_gene_variant(MODIFIER||3234||362|y…	159	101	COG0833	E	NO	2198301	2199770	-	A67G-A991G	-648.99	-649.43	1.08368e-14	1.63647e-14	322.96	450.52	0.5458	0.0907	62-114	0.3153	0.6573	61-113	0.3824	0.942708
2205685	T	C	SNP	missense_variant	MODERATE	aAc/aGc	p.Asn230Ser/c.689A>G	rihB	EFF=missense_variant(MODERATE|MISSENSE|aAc/aGc|p.Asn230Ser/c.689A>G|313|rihB|protein_coding|CODING|ACT39748|1|1),upstream_gene_variant(MODIFIER||4829||293|yeiE|protein_coding|CODING|ACT39743||1),upstream_gene_variant(MODIFIER||857||219|yeiL|protein_coding|CODING|ACT39749||1),upstream_gene_variant(MODIFIER||353||416|yeiJ|protein_coding|CODING|ACT39747||1),downstream_gene_variant(MODIFIER||3681||34…	0	22	COG1957	F	NO	2205432	2206373	-	A689G	-374.91	-374.91	7.10071e-11	6.43108e-11	250.48	260.74	0.5636	0.0012	677-855	0.9697	0.9952	501-574	0.9476	0.993531	0.978866
2216530	T	C	SNP	upstream_gene_variant	MODIFIER	.	.	.	EFF=upstream_gene_variant(MODIFIER||108||190|yeiP|protein_coding|CODING|ACT39758||1),upstream_gene_variant(MODIFIER||903||488|yeiQ|protein_coding|CODING|ACT39759||1),upstream_gene_variant(MODIFIER||3932||563|fruA|protein_coding|CODING|ACT39753||1),upstream_gene_variant(MODIFIER||2977||312|fruK|protein_coding|CODING|ACT39754||1),upstream_gene_variant(MODIFIER||2487||328|yeiR|protein_coding|CODING|…	.	.	NA	NA	.	.	.	.	.	.	.	.	.	.	.	.	.	.	.	.	.	.	.	.
2219619	G	A	SNP	synonymous_variant	LOW	ttG/ttA	p.Leu201Leu/c.603G>A	yeiR	EFF=synonymous_variant(LOW|SILENT|ttG/ttA|p.Leu201Leu/c.603G>A|328|yeiR|protein_coding|CODING|ACT39760|1|1|WARNING_TRANSCRIPT_NO_START_CODON),upstream_gene_variant(MODIFIER||4936||376|fruB|protein_coding|CODING|ACT39755||1),upstream_gene_variant(MODIFIER||423||237|yeiU|protein_coding|CODING|ACT39761||1),upstream_gene_variant(MODIFIER||1548||188|spr|protein_coding|CODING|ACT39762||1),upstream_gene…	73	24	COG0523	R	NO	2219017	2220003	+	G603A	-428.21	-427.7	1.15936e-10	2.34433e-09	120.54	103.76	0.5511	0.0553	506-606	0.4683	0.6976	507-604	0.4292	0.998692	0.929279
2223263	G	A	SNP	synonymous_variant	LOW	acG/acA	p.Thr450Thr/c.1350G>A	rtn	EFF=synonymous_variant(LOW|SILENT|acG/acA|p.Thr450Thr/c.1350G>A|518|rtn|protein_coding|CODING|ACT39763|1|1),upstream_gene_variant(MODIFIER||289||604|yejA|protein_coding|CODING|ACT39764||1),upstream_gene_variant(MODIFIER||2104||364|yejB|protein_coding|CODING|ACT39765||1),upstream_gene_variant(MODIFIER||3198||341|yejE|protein_coding|CODING|ACT39766||1),upstream_gene_variant(MODIFIER||4225||529|yejF…	19	37	COG2200	T	NO	2221914	2223470	+	G1350A	-572.86	-572.43	1.20802e-17	1.82159e-17	298.96	282.66	0.5262	0.0099	1330-1379	0.8355	0.9537	1324-1373	0.799	0.997733	0.999071
2226947	G	GG	INS	frameshift_variant	HIGH	gcg/gGcg	p.Ala163_Leu164fs/c.488_489insG	yejE	EFF=frameshift_variant(HIGH||gcg/gGcg|p.Ala163_Leu164fs/c.488_489insG|341|yejE|protein_coding|CODING|ACT39766|1|1),upstream_gene_variant(MODIFIER||540||529|yejF|protein_coding|CODING|ACT39767||1),upstream_gene_variant(MODIFIER||4872||586|yejH|protein_coding|CODING|ACT39771||1),downstream_gene_variant(MODIFIER||3478||518|rtn|protein_coding|CODING|ACT39763||1),downstream_gene_variant(MODIFIER||2133…	10	36	COG4239	R	NO	.	.	.	.	.	.	.	.	.	.	.	.	.	.	.	.	.	.	.
2233371	G	A	SNP	missense_variant	MODERATE	Gcc/Acc	p.Ala518Thr/c.1552G>A	yejH	EFF=missense_variant(MODERATE|MISSENSE|Gcc/Acc|p.Ala518Thr/c.1552G>A|586|yejH|protein_coding|CODING|ACT39771|1|1),upstream_gene_variant(MODIFIER||334||94|rplY|protein_coding|CODING|ACT39772||1),upstream_gene_variant(MODIFIER||3946||114|yejG|protein_coding|CODING|ACT39768||1|WARNING_TRANSCRIPT_NO_START_CODON),upstream_gene_variant(MODIFIER||1946||75|yejL|protein_coding|CODING|ACT39774||1),upstream…	18	31	COG1061	KL	NO	2231820	2233580	+	G1552A	-707.97	-704.53	7.8284e-18	5.83606e-18	221.34	241.98	0.5561	0.0349	1523-1612	0.5969	0.6522	1545-1604	0.3885	0.980684	0.908284
2234429	G	A	SNP	missense_variant	MODERATE	gCa/gTa	p.Ala236Val/c.707C>T	yejK	EFF=missense_variant(MODERATE|MISSENSE|gCa/gTa|p.Ala236Val/c.707C>T|335|yejK|protein_coding|CODING|ACT39773|1|1),upstream_gene_variant(MODIFIER||888||75|yejL|protein_coding|CODING|ACT39774||1),upstream_gene_variant(MODIFIER||1135||586|yejM|protein_coding|CODING|ACT39775||1),upstream_gene_variant(MODIFIER||3481||396|bcr|protein_coding|CODING|ACT39769||1|WARNING_TRANSCRIPT_NO_START_CODON),upstream_…	240	88	COG3081	R	NO	2234128	2235135	-	A227G-C707T	-422.89	-421.87	1.18526e-11	8.29832e-12	260.58	278.54	0.5221	0.046	217-296	0.522	0.8119	217-280	0.5543	0.982497	0.969812
2234909	T	C	SNP	missense_variant	MODERATE	gAc/gGc	p.Asp76Gly/c.227A>G	yejK	EFF=missense_variant(MODERATE|MISSENSE|gAc/gGc|p.Asp76Gly/c.227A>G|335|yejK|protein_coding|CODING|ACT39773|1|1),upstream_gene_variant(MODIFIER||408||75|yejL|protein_coding|CODING|ACT39774||1),upstream_gene_variant(MODIFIER||655||586|yejM|protein_coding|CODING|ACT39775||1),upstream_gene_variant(MODIFIER||3961||396|bcr|protein_coding|CODING|ACT39769||1|WARNING_TRANSCRIPT_NO_START_CODON),upstream_ge…	240	88	COG3081	R	NO	2234128	2235135	-	A227G-C707T	-422.89	-421.87	1.18526e-11	8.29832e-12	260.58	278.54	0.5221	0.046	217-296	0.522	0.8119	217-280	0.5543	0.982497	0.969812
2243409	T	C	SNP	synonymous_variant	LOW	gcA/gcG	p.Ala495Ala/c.1485A>G	ccmF	EFF=synonymous_variant(LOW|SILENT|gcA/gcG|p.Ala495Ala/c.1485A>G|647|ccmF|protein_coding|CODING|ACT39780|1|1),upstream_gene_variant(MODIFIER||3321||836|yejO|protein_coding|CODING|ACT39776||1),upstream_gene_variant(MODIFIER||1010||350|ccmH|protein_coding|CODING|ACT39778||1),upstream_gene_variant(MODIFIER||456||185|ccmG|protein_coding|CODING|ACT39779||1),downstream_gene_variant(MODIFIER||1481||159|c…	8	34	COG1138	O	NO	2242950	2244893	-	A796G-A1485G	-931.42	-932.33	7.94202e-20	7.04529e-20	463.68	469.81	0.5743	0.0034	786-849	0.9287	0.9787	786-849	0.873	0.887528	0.789339
2244098	T	C	SNP	missense_variant	MODERATE	Act/Gct	p.Thr266Ala/c.796A>G	ccmF	EFF=missense_variant(MODERATE|MISSENSE|Act/Gct|p.Thr266Ala/c.796A>G|647|ccmF|protein_coding|CODING|ACT39780|1|1),upstream_gene_variant(MODIFIER||4010||836|yejO|protein_coding|CODING|ACT39776||1),upstream_gene_variant(MODIFIER||1699||350|ccmH|protein_coding|CODING|ACT39778||1),upstream_gene_variant(MODIFIER||1145||185|ccmG|protein_coding|CODING|ACT39779||1),downstream_gene_variant(MODIFIER||792||1…	8	34	COG1138	O	NO	2242950	2244893	-	A796G-A1485G	-931.42	-932.33	7.94202e-20	7.04529e-20	463.68	469.81	0.5743	0.0034	786-849	0.9287	0.9787	786-849	0.873	0.887528	0.789339
2245571	G	GG	INS	frameshift_variant	HIGH	acc/aCcc	p.Thr2_Pro3fs/c.4_5insC	ccmD	EFF=frameshift_variant(HIGH||acc/aCcc|p.Thr2_Pro3fs/c.4_5insC|69|ccmD|protein_coding|CODING|ACT39782|1|1),frameshift_variant(HIGH||tga/tgaC|c.738_739insC|245|ccmC|protein_coding|CODING|ACT39783|1|1),upstream_gene_variant(MODIFIER||3173||350|ccmH|protein_coding|CODING|ACT39778||1),upstream_gene_variant(MODIFIER||2619||185|ccmG|protein_coding|CODING|ACT39779||1),upstream_gene_variant(MODIFIER||679|…	19	32	COG3114	U	NO	.	.	.	.	.	.	.	.	.	.	.	.	.	.	.	.	.	.	.
2249525	T	TT	INS	frameshift_variant	HIGH	gag/gagA	p.Glu14_Lys15fs/c.42_43insA	napH	EFF=frameshift_variant(HIGH||gag/gagA|p.Glu14_Lys15fs/c.42_43insA|287|napH|protein_coding|CODING|ACT39788|1|1),upstream_gene_variant(MODIFIER||4633||647|ccmF|protein_coding|CODING|ACT39780||1),upstream_gene_variant(MODIFIER||4157||159|ccmE|protein_coding|CODING|ACT39781||1),upstream_gene_variant(MODIFIER||3951||69|ccmD|protein_coding|CODING|ACT39782||1),upstream_gene_variant(MODIFIER||3217||245|c…	10	25	COG0348	C	NO	.	.	.	.	.	.	.	.	.	.	.	.	.	.	.	.	.	.	.
2264231	T	C	SNP	synonymous_variant	LOW	gtA/gtG	p.Val766Val/c.2298A>G	rcsC	EFF=synonymous_variant(LOW|SILENT|gtA/gtG|p.Val766Val/c.2298A>G|933|rcsC|protein_coding|CODING|ACT39802|1|1),upstream_gene_variant(MODIFIER||4786||216|alkB|protein_coding|CODING|ACT39796||1),upstream_gene_variant(MODIFIER||3722||354|ada|protein_coding|CODING|ACT39797||1),upstream_gene_variant(MODIFIER||2593||351|yojL|protein_coding|CODING|ACT39798||1),upstream_gene_variant(MODIFIER||2512||608|ato…	48	51	COG0642	T	NO	2263727	2266528	-	A2298G	-1166.24	-1166.69	1.68074e-28	4.59153e-29	894.31	795.58	0.5337	0.0349	2287-2336	0.597	0.8313	2268-2330	0.5798	0.98007	0.983645
2273410	T	C	SNP	missense_variant	MODERATE	gTc/gCc	p.Val201Ala/c.602T>C	atoB	EFF=missense_variant(MODERATE|MISSENSE|gTc/gCc|p.Val201Ala/c.602T>C|394|atoB|protein_coding|CODING|ACT39808|1|1),downstream_gene_variant(MODIFIER||4841||608|atoS|protein_coding|CODING|ACT39803||1),downstream_gene_variant(MODIFIER||657||258|yfaP|protein_coding|CODING|ACT39809||1),downstream_gene_variant(MODIFIER||1438||549|yfaQ|protein_coding|CODING|ACT39810||1|WARNING_TRANSCRIPT_NO_START_CODON),d…	0	21	COG0183	I	NO	2272809	2273993	+	T602C	-485.59	-488.47	1.31446e-13	1.75866e-13	258.82	154.22	0.5262	0.0047	696-796	0.909	0.9752	506-619	0.8608	0.999604	0.989675
2283334	T	TT	INS	frameshift_variant	HIGH	gaa/gAaa	p.Glu4_Lys5fs/c.10_11insA	yfaA	EFF=frameshift_variant(HIGH||gaa/gAaa|p.Glu4_Lys5fs/c.10_11insA|562|yfaA|protein_coding|CODING|ACT39813|1|1),upstream_gene_variant(MODIFIER||2233||1534|yfaS|protein_coding|CODING|ACT39811||1),upstream_gene_variant(MODIFIER||2932||240|ubiG|protein_coding|CODING|ACT39815||1),upstream_gene_variant(MODIFIER||1676||207|yfaT|protein_coding|CODING|ACT39812||1),downstream_gene_variant(MODIFIER||158||875|…	3	42	COG4685	S	NO	.	.	.	.	.	.	.	.	.	.	.	.	.	.	.	.	.	.	.
2283364	A	G	SNP	upstream_gene_variant	MODIFIER	.	.	.	EFF=upstream_gene_variant(MODIFIER||2262||1534|yfaS|protein_coding|CODING|ACT39811||1),upstream_gene_variant(MODIFIER||2903||240|ubiG|protein_coding|CODING|ACT39815||1),upstream_gene_variant(MODIFIER||1705||207|yfaT|protein_coding|CODING|ACT39812||1),upstream_gene_variant(MODIFIER||20||562|yfaA|protein_coding|CODING|ACT39813||1),downstream_gene_variant(MODIFIER||129||875|gyrA|protein_coding|CODIN…	.	.	NA	NA	.	.	.	.	.	.	.	.	.	.	.	.	.	.	.	.	.	.	.	.
2288493	C	T	SNP	missense_variant	MODERATE	Ggc/Agc	p.Gly793Ser/c.2377G>A	yfaL	EFF=missense_variant(MODERATE|MISSENSE|Ggc/Agc|p.Gly793Ser/c.2377G>A|1250|yfaL|protein_coding|CODING|ACT39816|1|1),upstream_gene_variant(MODIFIER||2373||875|gyrA|protein_coding|CODING|ACT39814||1),upstream_gene_variant(MODIFIER||3072||761|nrdA|protein_coding|CODING|ACT39817||1),downstream_gene_variant(MODIFIER||1504||240|ubiG|protein_coding|CODING|ACT39815||1)	2	25	COG3468	MU	NO	.	.	.	.	.	.	.	.	.	.	.	.	.	.	.	.	.	.	.
2288953	C	CC	INS	frameshift_variant	HIGH	gcg/gcGg	p.Ala639_Gly640fs/c.1916_1917insG	yfaL	EFF=frameshift_variant(HIGH||gcg/gcGg|p.Ala639_Gly640fs/c.1916_1917insG|1250|yfaL|protein_coding|CODING|ACT39816|1|1),upstream_gene_variant(MODIFIER||2834||875|gyrA|protein_coding|CODING|ACT39814||1),upstream_gene_variant(MODIFIER||2611||761|nrdA|protein_coding|CODING|ACT39817||1),downstream_gene_variant(MODIFIER||1965||240|ubiG|protein_coding|CODING|ACT39815||1)	2	25	COG3468	MU	NO	.	.	.	.	.	.	.	.	.	.	.	.	.	.	.	.	.	.	.
2293568	G	A	SNP	synonymous_variant	LOW	ctG/ctA	p.Leu668Leu/c.2004G>A	nrdA	EFF=synonymous_variant(LOW|SILENT|ctG/ctA|p.Leu668Leu/c.2004G>A|761|nrdA|protein_coding|CODING|ACT39817|1|1),upstream_gene_variant(MODIFIER||524||376|nrdB|protein_coding|CODING|ACT39818||1),upstream_gene_variant(MODIFIER||1654||84|yfaE|protein_coding|CODING|ACT39819||1),upstream_gene_variant(MODIFIER||2699||1250|yfaL|protein_coding|CODING|ACT39816||1),upstream_gene_variant(MODIFIER||2827||68|yfaH…	515	282	COG0209	F	YES	2291565	2293850	+	G2004A	-922.48	-917.81	2.1143e-25	4.8249e-25	420.91	576.46	0.5312	0.0802	1833-2061	0.355	0.5851	1916-2039	0.3353	0.913636	0.900562
2303231	A	G	SNP	missense_variant	MODERATE	Act/Gct	p.Thr335Ala/c.1003A>G	glpC	EFF=missense_variant(MODERATE|MISSENSE|Act/Gct|p.Thr335Ala/c.1003A>G|396|glpC|protein_coding|CODING|ACT39826|1|1),upstream_gene_variant(MODIFIER||381||300|yfaD|protein_coding|CODING|ACT39827||1),upstream_gene_variant(MODIFIER||4149||452|glpT|protein_coding|CODING|ACT39823||1),downstream_gene_variant(MODIFIER||1324||267|yfaU|protein_coding|CODING|ACT39828||1),downstream_gene_variant(MODIFIER||2145…	1	81	COG0247	C	NO	2302229	2303419	+	A1003G	-467.29	-468.97	3.94066e-11	4.95505e-11	191.95	163.2	0.545	0.0622	991-1040	0.4133	0.7361	993-1042	0.4509	0.978992	0.957014
2311391	G	A	SNP	missense_variant	MODERATE	Gaa/Aaa	p.Glu109Lys/c.325G>A	yfaO	EFF=missense_variant(MODERATE|MISSENSE|Gaa/Aaa|p.Glu109Lys/c.325G>A|141|yfaO|protein_coding|CODING|ACT39834|1|1|WARNING_TRANSCRIPT_NO_START_CODON),upstream_gene_variant(MODIFIER||4726||429|yfaV|protein_coding|CODING|ACT39829||1),upstream_gene_variant(MODIFIER||1032||385|yfbE|protein_coding|CODING|ACT39836||1),upstream_gene_variant(MODIFIER||3452||405|yfaW|protein_coding|CODING|ACT39830||1),upstre…	31	28	COG0494	LR	NO	2311067	2311492	+	G325A	-149.58	-149.58	9.75667e-07	1.26386e-06	94.19	93.03	0.4536	0.0005	313-411	0.9848	0.9975	307-411	0.9642	0.995876	0.980582
2314923	T	C	SNP	synonymous_variant	LOW	ggT/ggC	p.Gly124Gly/c.372T>C	yfbG	EFF=synonymous_variant(LOW|SILENT|ggT/ggC|p.Gly124Gly/c.372T>C|660|yfbG|protein_coding|CODING|ACT39838|1|1),upstream_gene_variant(MODIFIER||4777||400|yfaY|protein_coding|CODING|ACT39832||1),upstream_gene_variant(MODIFIER||4135||180|yfaZ|protein_coding|CODING|ACT39833||1),upstream_gene_variant(MODIFIER||1608||296|yfbH|protein_coding|CODING|ACT39839||1),upstream_gene_variant(MODIFIER||2790||200|ais…	2	110	COG0223	J	NO	2314552	2316534	+	T372C	-780.17	-778.72	4.40796e-22	4.8066e-23	407.87	531.24	0.5187	0.0168	172-389	0.7558	0.9105	344-425	0.7054	0.981645	0.962476
2320663	C	T	SNP	missense_variant	MODERATE	gGc/gAc	p.Gly285Asp/c.854G>A	menE	EFF=missense_variant(MODERATE|MISSENSE|gGc/gAc|p.Gly285Asp/c.854G>A|451|menE|protein_coding|CODING|ACT39844|1|1),upstream_gene_variant(MODIFIER||612||88|pmrD|protein_coding|CODING|ACT39843||1),downstream_gene_variant(MODIFIER||850||320|menC|protein_coding|CODING|ACT39845||1),downstream_gene_variant(MODIFIER||4129||660|yfbG|protein_coding|CODING|ACT39838||1),downstream_gene_variant(MODIFIER||3242|…	49	27	COG0318	IQ	NO	2320161	2321516	-	G854A	-627.47	-628.15	7.71755e-17	7.62352e-17	284.43	284.33	0.5661	0.0013	661-941	0.9668	0.9969	929-978	0.9598	0.999994	0.99986
2326756	T	C	SNP	missense_variant	MODERATE	cAg/cGg	p.Gln134Arg/c.401A>G	menF	EFF=missense_variant(MODERATE|MISSENSE|cAg/cGg|p.Gln134Arg/c.401A>G|431|menF|protein_coding|CODING|ACT39849|1|1|WARNING_TRANSCRIPT_NO_START_CODON),upstream_gene_variant(MODIFIER||4281||320|menC|protein_coding|CODING|ACT39845||1),upstream_gene_variant(MODIFIER||1365||305|elaC|protein_coding|CODING|ACT39852||1),upstream_gene_variant(MODIFIER||3424||285|menB|protein_coding|CODING|ACT39846||1),upstre…	55	33	COG1169	HQ	NO	2325861	2327156	-	A401G	-524.19	-527.29	1.63933e-14	2.14537e-15	353.48	241.74	0.5511	0.1783	549-598	0.1321	-0.2294	537-586	0.0362	0.872781	0.669265
2334251	T	C	SNP	missense_variant	MODERATE	tAc/tGc	p.Tyr200Cys/c.599A>G	nuoN	EFF=missense_variant(MODERATE|MISSENSE|tAc/tGc|p.Tyr200Cys/c.599A>G|425|nuoN|protein_coding|CODING|ACT39857|1|1),downstream_gene_variant(MODIFIER||785||509|nuoM|protein_coding|CODING|ACT39858||1),downstream_gene_variant(MODIFIER||3814||403|elaD|protein_coding|CODING|ACT39853||1),downstream_gene_variant(MODIFIER||2545||613|nuoL|protein_coding|CODING|ACT39859||1),downstream_gene_variant(MODIFIER||2…	90	148	COG1007	C	NO	2333572	2334849	-	A599G	-603.18	-602.58	2.74276e-14	1.21684e-14	200.87	209.19	0.5786	0.0361	494-604	0.5881	0.8898	495-601	0.6684	0.992241	0.990281
2335475	T	C	SNP	missense_variant	MODERATE	gAa/gGa	p.Glu364Gly/c.1091A>G	nuoM	EFF=missense_variant(MODERATE|MISSENSE|gAa/gGa|p.Glu364Gly/c.1091A>G|509|nuoM|protein_coding|CODING|ACT39858|1|1),upstream_gene_variant(MODIFIER||626||425|nuoN|protein_coding|CODING|ACT39857||1),downstream_gene_variant(MODIFIER||1321||613|nuoL|protein_coding|CODING|ACT39859||1),downstream_gene_variant(MODIFIER||3415||167|yfbM|protein_coding|CODING|ACT39854||1),downstream_gene_variant(MODIFIER||28…	54	113	COG1008	C	NO	2335036	2336565	-	A1091G	-689.7	-692.5	1.55612e-17	2.60327e-17	524.88	473.25	0.5486	0.2757	1039-1116	0.0541	-0.4328	1074-1136	0.015	0.9466	0.904938
2337827	C	T	SNP	missense_variant	MODERATE	Ggc/Agc	p.Gly271Ser/c.811G>A	nuoL	EFF=missense_variant(MODERATE|MISSENSE|Ggc/Agc|p.Gly271Ser/c.811G>A|613|nuoL|protein_coding|CODING|ACT39859|1|1),upstream_gene_variant(MODIFIER||2978||425|nuoN|protein_coding|CODING|ACT39857||1),upstream_gene_variant(MODIFIER||1262||509|nuoM|protein_coding|CODING|ACT39858||1),downstream_gene_variant(MODIFIER||4323||279|ECB_02200|protein_coding|CODING|ACT39856||1|WARNING_TRANSCRIPT_NO_START_CODON)…	48	126	COG1009	CP	NO	2336796	2338637	-	G811A	-858.51	-857.95	2.91336e-18	1.0187e-18	287.56	239.45	0.6035	0.0018	810-907	0.962	0.9902	858-907	0.9163	0.997618	0.986893
2343676	G	A	SNP	synonymous_variant	LOW	ggC/ggT	p.Gly29Gly/c.87C>T	nuoG	EFF=synonymous_variant(LOW|SILENT|ggC/ggT|p.Gly29Gly/c.87C>T|910|nuoG|protein_coding|CODING|ACT39864|1|1),upstream_gene_variant(MODIFIER||4740||100|nuoK|protein_coding|CODING|ACT39860||1),upstream_gene_variant(MODIFIER||4189||184|nuoJ|protein_coding|CODING|ACT39861||1),upstream_gene_variant(MODIFIER||3635||180|nuoI|protein_coding|CODING|ACT39862||1),upstream_gene_variant(MODIFIER||2643||325|nuoH|…	92	155	COG1034	C	NO	2341030	2343762	-	C87T	-1264.07	-1258.57	5.16263e-29	2.74264e-29	367.09	368.7	0.5331	0.0211	41-90	0.7198	0.9386	40-90	0.7603	0.998784	0.997608
2346864	T	C	SNP	synonymous_variant	LOW	gaA/gaG	p.Glu195Glu/c.585A>G	nuoC	EFF=synonymous_variant(LOW|SILENT|gaA/gaG|p.Glu195Glu/c.585A>G|600|nuoC|protein_coding|CODING|ACT39867|1|1),upstream_gene_variant(MODIFIER||3102||910|nuoG|protein_coding|CODING|ACT39864||1),upstream_gene_variant(MODIFIER||1718||445|nuoF|protein_coding|CODING|ACT39865||1),upstream_gene_variant(MODIFIER||1221||166|nuoE|protein_coding|CODING|ACT39866||1),upstream_gene_variant(MODIFIER||4288||405|yfb…	304	328	COG0852	C	NO	2345646	2347448	-	A585G	-770.84	-770.52	1.66703e-20	8.18155e-21	290.95	297.73	0.5586	0.0222	533-586	0.703	0.884	533-583	0.6586	0.993256	0.981709
2354459	T	C	SNP	missense_variant	MODERATE	aAc/aGc	p.Asn162Ser/c.485A>G	yfbS	EFF=missense_variant(MODERATE|MISSENSE|aAc/aGc|p.Asn162Ser/c.485A>G|610|yfbS|protein_coding|CODING|ACT39873|1|1|WARNING_TRANSCRIPT_NO_START_CODON),upstream_gene_variant(MODIFIER||4227||312|lrhA|protein_coding|CODING|ACT39870||1),upstream_gene_variant(MODIFIER||2603||400|ackA|protein_coding|CODING|ACT39877||1),upstream_gene_variant(MODIFIER||3880||714|pta|protein_coding|CODING|ACT39878||1|WARNING_…	3	22	COG0471	P	NO	2353111	2354943	-	C470T-A485G	-823.75	-825.02	5.68533e-18	4.54388e-17	534.45	615.52	0.5264	0.2678	469-521	0.058	0.0103	472-523	0.0803	0.881527	0.757156
2354474	G	A	SNP	missense_variant	MODERATE	cCg/cTg	p.Pro157Leu/c.470C>T	yfbS	EFF=missense_variant(MODERATE|MISSENSE|cCg/cTg|p.Pro157Leu/c.470C>T|610|yfbS|protein_coding|CODING|ACT39873|1|1|WARNING_TRANSCRIPT_NO_START_CODON),upstream_gene_variant(MODIFIER||4242||312|lrhA|protein_coding|CODING|ACT39870||1),upstream_gene_variant(MODIFIER||2588||400|ackA|protein_coding|CODING|ACT39877||1),upstream_gene_variant(MODIFIER||3865||714|pta|protein_coding|CODING|ACT39878||1|WARNING_…	3	22	COG0471	P	NO	2353111	2354943	-	C470T-A485G	-823.75	-825.02	5.68533e-18	4.54388e-17	534.45	615.52	0.5264	0.2678	469-521	0.058	0.0103	472-523	0.0803	0.881527	0.757156
2358596	G	A	SNP	synonymous_variant	LOW	gtG/gtA	p.Val86Val/c.258G>A	pta	EFF=synonymous_variant(LOW|SILENT|gtG/gtA|p.Val86Val/c.258G>A|714|pta|protein_coding|CODING|ACT39878|1|1|WARNING_TRANSCRIPT_NO_START_CODON),upstream_gene_variant(MODIFIER||3653||610|yfbS|protein_coding|CODING|ACT39873||1|WARNING_TRANSCRIPT_NO_START_CODON),upstream_gene_variant(MODIFIER||2077||506|yfcC|protein_coding|CODING|ACT39879||1),upstream_gene_variant(MODIFIER||2916||216|yfbT|protein_coding…	6	38	COG1859	J	NO	2358339	2360483	+	G258A	-899.9	-899.56	8.71667e-21	1.0925e-20	576.14	519.22	0.5337	0.0044	192-261	0.9136	0.9914	208-260	0.926	0.97953	0.944447
2360814	T	C	SNP	missense_variant	MODERATE	Tat/Cat	p.Tyr48His/c.142T>C	yfcC	EFF=missense_variant(MODERATE|MISSENSE|Tat/Cat|p.Tyr48His/c.142T>C|506|yfcC|protein_coding|CODING|ACT39879|1|1),upstream_gene_variant(MODIFIER||4629||164|yfbU|protein_coding|CODING|ACT39875||1),upstream_gene_variant(MODIFIER||4091||151|yfbV|protein_coding|CODING|ACT39876||1),upstream_gene_variant(MODIFIER||3399||215|yfcG|protein_coding|CODING|ACT39883||1),upstream_gene_variant(MODIFIER||4103||120…	2	19	COG1288	S	NO	2360673	2362193	+	T142C-A1187G	-665.76	-666.19	1.62744e-17	1.24375e-17	314.17	320.83	0.5177	0.1683	1164-1300	0.142	0.4753	1183-1273	0.2531	0.949662
2361859	A	G	SNP	missense_variant	MODERATE	gAc/gGc	p.Asp396Gly/c.1187A>G	yfcC	EFF=missense_variant(MODERATE|MISSENSE|gAc/gGc|p.Asp396Gly/c.1187A>G|506|yfcC|protein_coding|CODING|ACT39879|1|1),upstream_gene_variant(MODIFIER||2354||215|yfcG|protein_coding|CODING|ACT39883||1),upstream_gene_variant(MODIFIER||3058||120|folX|protein_coding|CODING|ACT39884||1),upstream_gene_variant(MODIFIER||3441||297|yfcH|protein_coding|CODING|ACT39885||1),downstream_gene_variant(MODIFIER||367||…	2	19	COG1288	S	NO	2360673	2362193	+	T142C-A1187G	-665.76	-666.19	1.62744e-17	1.24375e-17	314.17	320.83	0.5177	0.1683	1164-1300	0.142	0.4753	1183-1273	0.2531	0.949662
2363811	T	C	SNP	synonymous_variant	LOW	gaA/gaG	p.Glu89Glu/c.267A>G	yfcF	EFF=synonymous_variant(LOW|SILENT|gaA/gaG|p.Glu89Glu/c.267A>G|214|yfcF|protein_coding|CODING|ACT39882|1|1),upstream_gene_variant(MODIFIER||402||215|yfcG|protein_coding|CODING|ACT39883||1),upstream_gene_variant(MODIFIER||1106||120|folX|protein_coding|CODING|ACT39884||1),upstream_gene_variant(MODIFIER||1489||297|yfcH|protein_coding|CODING|ACT39885||1),upstream_gene_variant(MODIFIER||1043||180|yfcD|…	15	126	COG0625	O	NO	2363433	2364077	-	A267G	-264.93	-266.6	2.34229e-08	4.42268e-08	146.74	151.63	0.5312	0.1213	265-314	0.231	0.5854	259-308	0.3355	0.937217	0.95095
2364833	A	G	SNP	synonymous_variant	LOW	caA/caG	p.Gln207Gln/c.621A>G	yfcG	EFF=synonymous_variant(LOW|SILENT|caA/caG|p.Gln207Gln/c.621A>G|215|yfcG|protein_coding|CODING|ACT39883|1|1),upstream_gene_variant(MODIFIER||84||120|folX|protein_coding|CODING|ACT39884||1),upstream_gene_variant(MODIFIER||467||297|yfcH|protein_coding|CODING|ACT39885||1),upstream_gene_variant(MODIFIER||2065||180|yfcD|protein_coding|CODING|ACT39880||1),upstream_gene_variant(MODIFIER||1453||184|yfcE|p…	1	50	COG0625	O	NO	2364213	2364860	+	A621G	-251.13	-251.05	1.77321e-06	1.52438e-06	103.62	126.32	0.5614	0.0206	585-634	0.677	0.9023	585-634	0.6378	0.942022	0.853095
2367023	G	A	SNP	missense_variant	MODERATE	Cgc/Tgc	p.Arg37Cys/c.109C>T	yfcI	EFF=missense_variant(MODERATE|MISSENSE|Cgc/Tgc|p.Arg37Cys/c.109C>T|296|yfcI|protein_coding|CODING|ACT39886|1|1),upstream_gene_variant(MODIFIER||4255||180|yfcD|protein_coding|CODING|ACT39880||1),upstream_gene_variant(MODIFIER||3643||184|yfcE|protein_coding|CODING|ACT39881||1|WARNING_TRANSCRIPT_NO_START_CODON),upstream_gene_variant(MODIFIER||2946||214|yfcF|protein_coding|CODING|ACT39882||1),downstr…	6	35	COG1196	D	NO	2366241	2367131	-	C109T	-314.6	-316	4.99094e-10	3.35844e-09	142.31	136.67	0.4434	0.0857	31-127	0.2957	0.6214	31-127	0.3426	0.982639	0.986562
2381855	A	G	SNP	missense_variant	MODERATE	gAg/gGg	p.Glu105Gly/c.314A>G	flk	EFF=missense_variant(MODERATE|MISSENSE|gAg/gGg|p.Glu105Gly/c.314A>G|331|flk|protein_coding|CODING|ACT39902|1|1),upstream_gene_variant(MODIFIER||4337||304|accD|protein_coding|CODING|ACT39897||1),upstream_gene_variant(MODIFIER||3522||219|dedA|protein_coding|CODING|ACT39898||1),upstream_gene_variant(MODIFIER||2627||270|truA|protein_coding|CODING|ACT39899||1),upstream_gene_variant(MODIFIER||1614||337…	299	177	COG0330	O	NO	2381542	2382537	+	A314G-G903A	-396.63	-396.04	1.47618e-08	4.87084e-09	276.54	307.53	0.5164	0.0733	813-971	0.3825	0.7208	371-474	0.4517	0.856025	0.82397
2382444	G	A	SNP	synonymous_variant	LOW	ccG/ccA	p.Pro301Pro/c.903G>A	flk	EFF=synonymous_variant(LOW|SILENT|ccG/ccA|p.Pro301Pro/c.903G>A|331|flk|protein_coding|CODING|ACT39902|1|1),upstream_gene_variant(MODIFIER||4926||304|accD|protein_coding|CODING|ACT39897||1),upstream_gene_variant(MODIFIER||4111||219|dedA|protein_coding|CODING|ACT39898||1),upstream_gene_variant(MODIFIER||3216||270|truA|protein_coding|CODING|ACT39899||1),upstream_gene_variant(MODIFIER||2203||337|usg|…	299	177	COG0330	O	NO	2381542	2382537	+	A314G-G903A	-396.63	-396.04	1.47618e-08	4.87084e-09	276.54	307.53	0.5164	0.0733	813-971	0.3825	0.7208	371-474	0.4517	0.856025	0.82397
2384114	C	T	SNP	missense_variant	MODERATE	Gaa/Aaa	p.Glu362Lys/c.1084G>A	fabB	EFF=missense_variant(MODERATE|MISSENSE|Gaa/Aaa|p.Glu362Lys/c.1084G>A|406|fabB|protein_coding|CODING|ACT39904|1|1),upstream_gene_variant(MODIFIER||4886||270|truA|protein_coding|CODING|ACT39899||1),upstream_gene_variant(MODIFIER||3873||337|usg|protein_coding|CODING|ACT39900||1),upstream_gene_variant(MODIFIER||1242||668|yfcK|protein_coding|CODING|ACT39905||1|WARNING_TRANSCRIPT_NO_START_CODON),upstre…	232	139	COG0304	IQ	YES	2383977	2385197	-	G1084A	-530.7	-530.39	5.31293e-12	6.14478e-12	237.13	208.99	0.5621	0.0149	1037-1086	0.7807	0.9355	1036-1088	0.7496	0.989784	0.982082
2388454	T	C	SNP	synonymous_variant	LOW	aaA/aaG	p.Lys233Lys/c.699A>G	yfcA	EFF=synonymous_variant(LOW|SILENT|aaA/aaG|p.Lys233Lys/c.699A>G|269|yfcA|protein_coding|CODING|ACT39908|1|1),upstream_gene_variant(MODIFIER||4742||392|yfcJ|protein_coding|CODING|ACT39903||1),upstream_gene_variant(MODIFIER||3257||406|fabB|protein_coding|CODING|ACT39904||1),upstream_gene_variant(MODIFIER||3744||183|yfcN|protein_coding|CODING|ACT39912||1),upstream_gene_variant(MODIFIER||693||92|yfcL|…	76	51	COG0730	R	NO	2388343	2389152	-	A699G	-345.64	-350.18	8.72993e-09	1.07622e-08	216.88	90.23	0.5481	0.0026	657-711	0.9428	0.9947	655-711	0.9458	0.980221	0.94687
2397507	CC	C	DEL	frameshift_variant	HIGH	gag/	p.Glu386fs/c.1158delG	yfcTU	EFF=frameshift_variant(HIGH||gag/|p.Glu386fs/c.1158delG|881|yfcTU|protein_coding|CODING|ACT39918|1|1),upstream_gene_variant(MODIFIER||3836||265|yfcO|protein_coding|CODING|ACT39913||1),upstream_gene_variant(MODIFIER||3256||183|yfcP|protein_coding|CODING|ACT39914||1),upstream_gene_variant(MODIFIER||2780||159|yfcQ|protein_coding|CODING|ACT39915||1),upstream_gene_variant(MODIFIER||2277||168|yfcR|prot…	NA	NA	COG3188	NU	NO	.	.	.	.	.	.	.	.	.	.	.	.	.	.	.	.	.	.	.
2400324	G	A	SNP	synonymous_variant	LOW	agC/agT	p.Ser51Ser/c.153C>T	sixA	EFF=synonymous_variant(LOW|SILENT|agC/agT|p.Ser51Ser/c.153C>T|161|sixA|protein_coding|CODING|ACT39920|1|1),upstream_gene_variant(MODIFIER||4324||250|yfcS|protein_coding|CODING|ACT39917||1),upstream_gene_variant(MODIFIER||1659||881|yfcTU|protein_coding|CODING|ACT39918||1),upstream_gene_variant(MODIFIER||1013||187|yfcV|protein_coding|CODING|ACT39919||1),upstream_gene_variant(MODIFIER||4640||448|fad…	176	159	COG2062	T	NO	2399991	2400476	-	C153T	-207.64	-203.37	0.000160907	5.41302e-05	51.08	59.95	0.5382	0.0921	124-173	0.3185	0.5505	109-159	0.3113	0.951813	0.864931
2402439	T	C	SNP	missense_variant	MODERATE	Act/Gct	p.Thr129Ala/c.385A>G	yfcX	EFF=missense_variant(MODERATE|MISSENSE|Act/Gct|p.Thr129Ala/c.385A>G|714|yfcX|protein_coding|CODING|ACT39921|1|1),upstream_gene_variant(MODIFIER||3774||881|yfcTU|protein_coding|CODING|ACT39918||1),upstream_gene_variant(MODIFIER||3128||187|yfcV|protein_coding|CODING|ACT39919||1),upstream_gene_variant(MODIFIER||2525||448|fadL|protein_coding|CODING|ACT39924||1),upstream_gene_variant(MODIFIER||1963||1…	5	57	COG1024	I	NO	2400679	2402823	-	A385G	-915.42	-922.41	1.46603e-24	1.62479e-22	513.06	341.3	0.5586	0.2472	346-489	0.0698	-0.1826	386-454	0.043	0.938519	0.873775
2403765	G	A	SNP	synonymous_variant	LOW	gcC/gcT	p.Ala123Ala/c.369C>T	yfcY	EFF=synonymous_variant(LOW|SILENT|gcC/gcT|p.Ala123Ala/c.369C>T|436|yfcY|protein_coding|CODING|ACT39922|1|1),upstream_gene_variant(MODIFIER||4454||187|yfcV|protein_coding|CODING|ACT39919||1),upstream_gene_variant(MODIFIER||1199||448|fadL|protein_coding|CODING|ACT39924||1),upstream_gene_variant(MODIFIER||3289||161|sixA|protein_coding|CODING|ACT39920||1),upstream_gene_variant(MODIFIER||942||714|yfcX…	2	43	COG0183	I	NO	2402823	2404133	-	C369T	-573.27	-570.37	9.29014e-13	1.20494e-13	377.76	420.58	0.5411	0.1826	299-398	0.1268	0.0915	324-394	0.1014	0.879079	0.74158
2404152	AA	A	DEL	upstream_gene_variant	MODIFIER	.	.	.	EFF=upstream_gene_variant(MODIFIER||4842||187|yfcV|protein_coding|CODING|ACT39919||1),upstream_gene_variant(MODIFIER||811||448|fadL|protein_coding|CODING|ACT39924||1),upstream_gene_variant(MODIFIER||3677||161|sixA|protein_coding|CODING|ACT39920||1),upstream_gene_variant(MODIFIER||1330||714|yfcX|protein_coding|CODING|ACT39921||1),upstream_gene_variant(MODIFIER||20||436|yfcY|protein_coding|CODING|A…	.	.	NA	NA	.	.	.	.	.	.	.	.	.	.	.	.	.	.	.	.	.	.	.	.
2404859	T	C	SNP	upstream_gene_variant	MODIFIER	.	.	.	EFF=upstream_gene_variant(MODIFIER||105||448|fadL|protein_coding|CODING|ACT39924||1),upstream_gene_variant(MODIFIER||4383||161|sixA|protein_coding|CODING|ACT39920||1),upstream_gene_variant(MODIFIER||2036||714|yfcX|protein_coding|CODING|ACT39921||1),upstream_gene_variant(MODIFIER||726||436|yfcY|protein_coding|CODING|ACT39922||1),upstream_gene_variant(MODIFIER||261||94|yfcZ|protein_coding|CODING|AC…	.	.	NA	NA	.	.	.	.	.	.	.	.	.	.	.	.	.	.	.	.	.	.	.	.
2406553	C	CC	INS	upstream_gene_variant	MODIFIER	.	.	.	EFF=upstream_gene_variant(MODIFIER||3731||714|yfcX|protein_coding|CODING|ACT39921||1),upstream_gene_variant(MODIFIER||2421||436|yfcY|protein_coding|CODING|ACT39922||1),upstream_gene_variant(MODIFIER||1956||94|yfcZ|protein_coding|CODING|ACT39923||1),upstream_gene_variant(MODIFIER||3189||310|yfdC|protein_coding|CODING|ACT39928||1),upstream_gene_variant(MODIFIER||4197|||argW|tRNA|NON_CODING|ECB_t000…	.	.	NA	NA	.	.	.	.	.	.	.	.	.	.	.	.	.	.	.	.	.	.	.	.
2413836	A	G	SNP	synonymous_variant	LOW	gaA/gaG	p.Glu136Glu/c.408A>G	dsdA	EFF=synonymous_variant(LOW|SILENT|gaA/gaG|p.Glu136Glu/c.408A>G|442|dsdA|protein_coding|CODING|ACT39931|1|1),upstream_gene_variant(MODIFIER||4387||251|vacJ|protein_coding|CODING|ACT39927||1),upstream_gene_variant(MODIFIER||1980||311|dsdC|protein_coding|CODING|ACT39929||1),upstream_gene_variant(MODIFIER||4146||204|evgA|protein_coding|CODING|ACT39934||1),upstream_gene_variant(MODIFIER||4765||1197|ev…	11	25	COG3048	E	NO	2413429	2414757	+	A408G	-522.74	-523.98	3.82834e-14	2.52448e-14	396.45	400.76	0.4913	0.045	405-454	0.464	0.9029	405-455	0.6677	0.993668	0.992871
2416245	G	A	SNP	synonymous_variant	LOW	gaC/gaT	p.Asp53Asp/c.159C>T	emrY	EFF=synonymous_variant(LOW|SILENT|gaC/gaT|p.Asp53Asp/c.159C>T|512|emrY|protein_coding|CODING|ACT39932|1|1),upstream_gene_variant(MODIFIER||4389||311|dsdC|protein_coding|CODING|ACT39929||1),upstream_gene_variant(MODIFIER||1737||204|evgA|protein_coding|CODING|ACT39934||1),upstream_gene_variant(MODIFIER||2356||1197|evgS|protein_coding|CODING|ACT39935||1),downstream_gene_variant(MODIFIER||158||387|em…	2	50	COG0477	GEPR	NO	2414865	2416403	-	C159T	-518.51	-519.27	2.66663e-18	1.59547e-18	323.44	325.5	0.4262	0.0445	131-180	0.5208	0.2487	131-181	0.1452	0.986156	0.949688
2417704	A	AA	INS	upstream_gene_variant	MODIFIER	.	.	.	EFF=upstream_gene_variant(MODIFIER||277||204|evgA|protein_coding|CODING|ACT39934||1),upstream_gene_variant(MODIFIER||896||1197|evgS|protein_coding|CODING|ACT39935||1),upstream_gene_variant(MODIFIER||1302||512|emrY|protein_coding|CODING|ACT39932||1),upstream_gene_variant(MODIFIER||139||387|emrK|protein_coding|CODING|ACT39933||1|WARNING_TRANSCRIPT_NO_START_CODON),downstream_gene_variant(MODIFIER||4…	.	.	NA	NA	.	.	.	.	.	.	.	.	.	.	.	.	.	.	.	.	.	.	.	.
2419541	CC	C	DEL	frameshift_variant	HIGH	ccc/	p.Pro314fs/c.942delC	evgS	EFF=frameshift_variant(HIGH||ccc/|p.Pro314fs/c.942delC|1197|evgS|protein_coding|CODING|ACT39935|1|1),upstream_gene_variant(MODIFIER||3139||512|emrY|protein_coding|CODING|ACT39932||1),upstream_gene_variant(MODIFIER||1976||387|emrK|protein_coding|CODING|ACT39933||1|WARNING_TRANSCRIPT_NO_START_CODON),downstream_gene_variant(MODIFIER||4785||442|dsdA|protein_coding|CODING|ACT39931||1),downstream_gene_…	19	31	COG0834	ET	NO	.	.	.	.	.	.	.	.	.	.	.	.	.	.	.	.	.	.	.
2422367	T	C	SNP	synonymous_variant	LOW	ggA/ggG	p.Gly343Gly/c.1029A>G	yfdE	EFF=synonymous_variant(LOW|SILENT|ggA/ggG|p.Gly343Gly/c.1029A>G|381|yfdE|protein_coding|CODING|ACT39936|1|1),upstream_gene_variant(MODIFIER||4801||387|emrK|protein_coding|CODING|ACT39933||1|WARNING_TRANSCRIPT_NO_START_CODON),downstream_gene_variant(MODIFIER||1102||314|yfdV|protein_coding|CODING|ACT39937||1),downstream_gene_variant(MODIFIER||3771||204|evgA|protein_coding|CODING|ACT39934||1),downst…	0	15	COG1804	C	NO	2422250	2423395	-	A1029G	-396.15	-396.77	6.39767e-12	6.40427e-12	177.94	184.64	0.4748	0.002	966-1029	0.9521	0.9806	971-1027	0.8778	0.994177	0.983648
2429200	T	C	SNP	upstream_gene_variant	MODIFIER	.	.	.	EFF=upstream_gene_variant(MODIFIER||4787||314|yfdV|protein_coding|CODING|ACT39937||1),upstream_gene_variant(MODIFIER||669||306|ddg|protein_coding|CODING|ACT39943||1),upstream_gene_variant(MODIFIER||3023||564|yfdU|protein_coding|CODING|ACT39938||1),upstream_gene_variant(MODIFIER||1719||416|yfdW|protein_coding|CODING|ACT39939||1),upstream_gene_variant(MODIFIER||3696||565|ypdA|protein_coding|CODING|…	.	.	NA	NA	.	.	.	.	.	.	.	.	.	.	.	.	.	.	.	.	.	.	.	.
2438845	C	T	SNP	missense_variant	MODERATE	Gcc/Acc	p.Ala310Thr/c.928G>A	ypdE	EFF=missense_variant(MODERATE|MISSENSE|Gcc/Acc|p.Ala310Thr/c.928G>A|345|ypdE|protein_coding|CODING|ACT39949|1|1),upstream_gene_variant(MODIFIER||135||831|ypdD|protein_coding|CODING|ACT39948||1),downstream_gene_variant(MODIFIER||4252||565|ypdA|protein_coding|CODING|ACT39945||1|WARNING_TRANSCRIPT_NO_START_CODON),downstream_gene_variant(MODIFIER||927||361|ypdF|protein_coding|CODING|ACT39950||1),down…	0	12	COG1363	G	NO	2438735	2439772	-	G928A	-489.02	-485.67	7.39827e-11	5.42468e-11	189.35	290.18	0.5756	0.0821	926-978	0.3514	0.4617	925-978	0.2497	0.932264	0.901187
2445096	CC	C	DEL	frameshift_variant	HIGH	cac/	p.His415fs/c.1243delC	yfeO	EFF=frameshift_variant(HIGH||cac/|p.His415fs/c.1243delC|418|yfeO|protein_coding|CODING|ACT39954|1|1),upstream_gene_variant(MODIFIER||129||108|ypeC|protein_coding|CODING|ACT39955||1),upstream_gene_variant(MODIFIER||4240||361|ypdF|protein_coding|CODING|ACT39950||1),upstream_gene_variant(MODIFIER||2978||415|ypdG|protein_coding|CODING|ACT39951||1),upstream_gene_variant(MODIFIER||2170||400|nupC|protei…	3	33	COG0038	P	NO	.	.	.	.	.	.	.	.	.	.	.	.	.	.	.	.	.	.	.
2446452	T	C	SNP	synonymous_variant	LOW	ttA/ttG	p.Leu160Leu/c.480A>G	mntH	EFF=synonymous_variant(LOW|SILENT|ttA/ttG|p.Leu160Leu/c.480A>G|412|mntH|protein_coding|CODING|ACT39956|1|1),upstream_gene_variant(MODIFIER||4333||415|ypdG|protein_coding|CODING|ACT39951||1),upstream_gene_variant(MODIFIER||815||400|nupC|protein_coding|CODING|ACT39957||1),upstream_gene_variant(MODIFIER||3985||108|ypdH|protein_coding|CODING|ACT39952||1),upstream_gene_variant(MODIFIER||2801||321|glk|…	16	43	COG1914	P	NO	2445693	2446931	-	A480G	-539.28	-542.91	2.62608e-14	2.32778e-13	165.75	405.81	0.5087	0.058	463-512	0.4541	0.9188	467-517	0.7213	0.989255	0.916507
2446985	A	G	SNP	upstream_gene_variant	MODIFIER	.	.	.	EFF=upstream_gene_variant(MODIFIER||4866||415|ypdG|protein_coding|CODING|ACT39951||1),upstream_gene_variant(MODIFIER||282||400|nupC|protein_coding|CODING|ACT39957||1),upstream_gene_variant(MODIFIER||4518||108|ypdH|protein_coding|CODING|ACT39952||1),upstream_gene_variant(MODIFIER||3334||321|glk|protein_coding|CODING|ACT39953||1),upstream_gene_variant(MODIFIER||4358||114|yfeC|protein_coding|CODING|…	.	.	NA	NA	.	.	.	.	.	.	.	.	.	.	.	.	.	.	.	.	.	.	.	.
2451870	A	G	SNP	missense_variant	MODERATE	aAc/aGc	p.Asn61Ser/c.182A>G	yfeD	EFF=missense_variant(MODERATE|MISSENSE|aAc/aGc|p.Asn61Ser/c.182A>G|130|yfeD|protein_coding|CODING|ACT39960|1|1),upstream_gene_variant(MODIFIER||4939||412|mntH|protein_coding|CODING|ACT39956||1),upstream_gene_variant(MODIFIER||1937|||valU|tRNA|NON_CODING|ECB_t00041||1),upstream_gene_variant(MODIFIER||2057|||valX|tRNA|NON_CODING|ECB_t00042||1),upstream_gene_variant(MODIFIER||2179|||valY|tRNA|NON_CO…	25	48	COG1396	K	NO	2451689	2452081	+	A182G	-131.56	-132.4	4.84844e-05	7.95773e-05	58.63	66.75	0.4634	0.0056	152-276	0.8844	0.9762	176-279	0.8619	0.993009	0.970204
2457419	T	C	SNP	missense_variant	MODERATE	aAc/aGc	p.Asn495Ser/c.1484A>G	ligA	EFF=missense_variant(MODERATE|MISSENSE|aAc/aGc|p.Asn495Ser/c.1484A>G|671|ligA|protein_coding|CODING|ACT39966|1|1),upstream_gene_variant(MODIFIER||3871||471|gltX|protein_coding|CODING|ACT39961||1),upstream_gene_variant(MODIFIER||2770||253|cysZ|protein_coding|CODING|ACT39968||1),upstream_gene_variant(MODIFIER||1837||308|yfeR|protein_coding|CODING|ACT39963||1),upstream_gene_variant(MODIFIER||3716||3…	127	76	COG0272	L	YES	2456887	2458902	-	A1484G	-885.61	-887.93	2.14232e-20	1.25564e-20	385.72	406.85	0.5337	0.1798	1518-1567	0.1303	0.3858	1321-1371	0.2138	0.985635	0.962455
2461608	T	C	SNP	synonymous_variant	LOW	ggT/ggC	p.Gly158Gly/c.474T>C	cysK	EFF=synonymous_variant(LOW|SILENT|ggT/ggC|p.Gly158Gly/c.474T>C|323|cysK|protein_coding|CODING|ACT39969|1|1),upstream_gene_variant(MODIFIER||4723||72|ypeB|protein_coding|CODING|ACT39965||1),upstream_gene_variant(MODIFIER||882||85|ptsH|protein_coding|CODING|ACT39970||1),upstream_gene_variant(MODIFIER||1184||575|ptsI|protein_coding|CODING|ACT39971||1),upstream_gene_variant(MODIFIER||2706||671|ligA|p…	275	3808	COG0031	E	NO	2461135	2462106	+	T474C	-376.19	-377.01	2.51621e-12	4.30347e-12	208.53	208.02	0.5162	0.0995	438-491	0.289	0.1583	444-493	0.1216	0.974038	0.986985
2485272	T	C	SNP	synonymous_variant	LOW	gcA/gcG	p.Ala309Ala/c.927A>G	eutB	EFF=synonymous_variant(LOW|SILENT|gcA/gcG|p.Ala309Ala/c.927A>G|453|eutB|protein_coding|CODING|ACT39996|1|1),upstream_gene_variant(MODIFIER||2571||350|yfeG|protein_coding|CODING|ACT39992||1),upstream_gene_variant(MODIFIER||2025||166|yffI|protein_coding|CODING|ACT39993||1),upstream_gene_variant(MODIFIER||1353||219|eutL|protein_coding|CODING|ACT39994||1),upstream_gene_variant(MODIFIER||456||295|eutC…	17	34	NA	NA	NO	2484837	2486198	-	C37T-C788T-A927G	-571.14	-573.78	1.56089e-14	3.38735e-14	262.03	179.39	0.5528	0.2505	902-980	0.0596	-0.0941	919-979	0.0435	0.922637	0.866878
2485411	G	A	SNP	missense_variant	MODERATE	gCg/gTg	p.Ala263Val/c.788C>T	eutB	EFF=missense_variant(MODERATE|MISSENSE|gCg/gTg|p.Ala263Val/c.788C>T|453|eutB|protein_coding|CODING|ACT39996|1|1),upstream_gene_variant(MODIFIER||2710||350|yfeG|protein_coding|CODING|ACT39992||1),upstream_gene_variant(MODIFIER||2164||166|yffI|protein_coding|CODING|ACT39993||1),upstream_gene_variant(MODIFIER||1492||219|eutL|protein_coding|CODING|ACT39994||1),upstream_gene_variant(MODIFIER||595||295…	17	34	NA	NA	NO	2484837	2486198	-	C37T-C788T-A927G	-571.14	-573.78	1.56089e-14	3.38735e-14	262.03	179.39	0.5528	0.2505	902-980	0.0596	-0.0941	919-979	0.0435	0.922637	0.866878
2486162	G	A	SNP	stop_gained	HIGH	Cag/Tag	p.Gln13*/c.37C>T	eutB	EFF=stop_gained(HIGH|NONSENSE|Cag/Tag|p.Gln13*/c.37C>T|453|eutB|protein_coding|CODING|ACT39996|1|1),upstream_gene_variant(MODIFIER||3461||350|yfeG|protein_coding|CODING|ACT39992||1),upstream_gene_variant(MODIFIER||2915||166|yffI|protein_coding|CODING|ACT39993||1),upstream_gene_variant(MODIFIER||2243||219|eutL|protein_coding|CODING|ACT39994||1),upstream_gene_variant(MODIFIER||1346||295|eutC|protei…	17	34	NA	NA	NO	2484837	2486198	-	C37T-C788T-A927G	-571.14	-573.78	1.56089e-14	3.38735e-14	262.03	179.39	0.5528	0.2505	902-980	0.0596	-0.0941	919-979	0.0435	0.922637	0.866878
2488604	G	A	SNP	missense_variant	MODERATE	cCg/cTg	p.Pro78Leu/c.233C>T	eutH	EFF=missense_variant(MODERATE|MISSENSE|cCg/cTg|p.Pro78Leu/c.233C>T|408|eutH|protein_coding|CODING|ACT39998|1|1),upstream_gene_variant(MODIFIER||4685||219|eutL|protein_coding|CODING|ACT39994||1),upstream_gene_variant(MODIFIER||3788||295|eutC|protein_coding|CODING|ACT39995||1),upstream_gene_variant(MODIFIER||2406||453|eutB|protein_coding|CODING|ACT39996||1),upstream_gene_variant(MODIFIER||991||467|…	0	25	COG3192	E	NO	2487610	2488836	-	C233T	-548.07	-545.37	2.96403e-12	2.92159e-12	274.15	274.61	0.5711	0.0132	207-399	0.7965	0.9501	212-377	0.7899	0.997492	0.991226
2491898	G	A	SNP	missense_variant	MODERATE	aCc/aTc	p.Thr228Ile/c.683C>T	eutE	EFF=missense_variant(MODERATE|MISSENSE|aCc/aTc|p.Thr228Ile/c.683C>T|467|eutE|protein_coding|CODING|ACT40001|1|1),upstream_gene_variant(MODIFIER||4285||467|eutA|protein_coding|CODING|ACT39997||1|WARNING_TRANSCRIPT_NO_START_CODON),upstream_gene_variant(MODIFIER||3062||408|eutH|protein_coding|CODING|ACT39998||1),upstream_gene_variant(MODIFIER||1558||395|eutG|protein_coding|CODING|ACT39999||1),upstre…	0	7	COG1012	C	NO	2491177	2492580	-	C683T	-656.07	-656.07	2.13174e-13	3.59168e-13	279.69	307.03	0.5761	0.0036	659-708	0.9268	0.9855	650-699	0.8991	0.987256	0.98269
2493000	TA	T	DEL	frameshift_variant	HIGH	gat/	p.Asp93fs/c.279delT	cchA	EFF=frameshift_variant(HIGH||gat/|p.Asp93fs/c.279delT|97|cchA|protein_coding|CODING|ACT40003|1|1),upstream_gene_variant(MODIFIER||4165||408|eutH|protein_coding|CODING|ACT39998||1),upstream_gene_variant(MODIFIER||2661||395|eutG|protein_coding|CODING|ACT39999||1),upstream_gene_variant(MODIFIER||1835||278|eutJ|protein_coding|CODING|ACT40000||1),upstream_gene_variant(MODIFIER||421||467|eutE|protein_c…	0	25	COG4577	QC	NO	.	.	.	.	.	.	.	.	.	.	.	.	.	.	.	.	.	.	.
2495620	C	T	SNP	missense_variant	MODERATE	cGc/cAc	p.Arg71His/c.212G>A	eutQ	EFF=missense_variant(MODERATE|MISSENSE|cGc/cAc|p.Arg71His/c.212G>A|233|eutQ|protein_coding|CODING|ACT40006|1|1|WARNING_TRANSCRIPT_NO_START_CODON),upstream_gene_variant(MODIFIER||4454||278|eutJ|protein_coding|CODING|ACT40000||1),upstream_gene_variant(MODIFIER||3040||467|eutE|protein_coding|CODING|ACT40001||1),upstream_gene_variant(MODIFIER||2741||95|cchB|protein_coding|CODING|ACT40002||1),upstream…	0	17	COG4766	E	NO	2495130	2495831	-	G212A	-284.48	-282.77	6.81103e-08	9.03559e-08	108.97	101.75	0.5611	0.021	190-411	0.7144	0.9302	199-400	0.7447	0.989013	0.990173
2499099	G	A	SNP	missense_variant	MODERATE	gCg/gTg	p.Ala36Val/c.107C>T	maeB	EFF=missense_variant(MODERATE|MISSENSE|gCg/gTg|p.Ala36Val/c.107C>T|759|maeB|protein_coding|CODING|ACT40009|1|1),upstream_gene_variant(MODIFIER||4765||338|eutI|protein_coding|CODING|ACT40004||1),upstream_gene_variant(MODIFIER||395||316|talA|protein_coding|CODING|ACT40010||1),upstream_gene_variant(MODIFIER||3966||269|eutT|protein_coding|CODING|ACT40005||1),upstream_gene_variant(MODIFIER||1365||667|…	24	132	COG0281	C	NO	2496926	2499205	-	C107T	-982.4	-980.1	6.97834e-23	6.29913e-23	515.57	654.09	0.5277	0.0099	94-270	0.8469	0.967	43-111	0.8396	0.999997	0.999904
2506607	T	TT	INS	frameshift_variant	HIGH	tac/tTac	p.Tyr17_Ile18fs/c.50_51insT	narQ	EFF=frameshift_variant(HIGH||tac/tTac|p.Tyr17_Ile18fs/c.50_51insT|566|narQ|protein_coding|CODING|ACT40015|1|1|WARNING_TRANSCRIPT_NO_START_CODON),upstream_gene_variant(MODIFIER||1815||1037|acrD|protein_coding|CODING|ACT40016||1),upstream_gene_variant(MODIFIER||3003||347|ypfG|protein_coding|CODING|ACT40012||1),upstream_gene_variant(MODIFIER||2302||191|yffH|protein_coding|CODING|ACT40013||1),upstrea…	16	34	COG3850	T	NO	.	.	.	.	.	.	.	.	.	.	.	.	.	.	.	.	.	.	.
2510817	T	C	SNP	missense_variant	MODERATE	Ttc/Ctc	p.Phe799Leu/c.2395T>C	acrD	EFF=missense_variant(MODERATE|MISSENSE|Ttc/Ctc|p.Phe799Leu/c.2395T>C|1037|acrD|protein_coding|CODING|ACT40016|1|1),upstream_gene_variant(MODIFIER||4464||659|aegA|protein_coding|CODING|ACT40014||1),upstream_gene_variant(MODIFIER||1258||118|yffB|protein_coding|CODING|ACT40017||1),upstream_gene_variant(MODIFIER||1618||375|dapE|protein_coding|CODING|ACT40018||1),upstream_gene_variant(MODIFIER||2773||…	5	25	COG0841	V	NO	2508423	2511536	+	T2395C	-1377.44	-1379.07	9.52846e-31	7.34531e-31	806.89	837.32	0.5486	0.0084	2334-2395	0.8554	0.9593	2334-2407	0.8137	0.999119	0.996586
2511663	T	C	SNP	upstream_gene_variant	MODIFIER	.	.	.	EFF=upstream_gene_variant(MODIFIER||412||118|yffB|protein_coding|CODING|ACT40017||1),upstream_gene_variant(MODIFIER||772||375|dapE|protein_coding|CODING|ACT40018||1),upstream_gene_variant(MODIFIER||1927||66|ECB_02364|protein_coding|CODING|ACT40019||1),downstream_gene_variant(MODIFIER||3404||566|narQ|protein_coding|CODING|ACT40015||1|WARNING_TRANSCRIPT_NO_START_CODON),downstream_gene_variant(MODIF…	.	.	NA	NA	.	.	.	.	.	.	.	.	.	.	.	.	.	.	.	.	.	.	.	.
2519004	T	C	SNP	synonymous_variant	LOW	gtA/gtG	p.Val230Val/c.690A>G	nlpB	EFF=synonymous_variant(LOW|SILENT|gtA/gtG|p.Val230Val/c.690A>G|344|nlpB|protein_coding|CODING|ACT40024|1|1),upstream_gene_variant(MODIFIER||4406||232|ypfH|protein_coding|CODING|ACT40020||1),upstream_gene_variant(MODIFIER||1730||190|gcvR|protein_coding|CODING|ACT40026||1),upstream_gene_variant(MODIFIER||2302||156|bcp|protein_coding|CODING|ACT40027||1),upstream_gene_variant(MODIFIER||2317||671|ypfI…	228	177	COG3317	M	NO	2518659	2519693	-	A690G	-474.24	-474.11	5.97876e-10	1.37885e-10	262.14	291.99	0.5711	0.0698	689-739	0.3975	0.7985	689-739	0.5375	0.977877	0.894031
2519957	G	A	SNP	missense_variant	MODERATE	gCg/gTg	p.Ala211Val/c.632C>T	dapA	EFF=missense_variant(MODERATE|MISSENSE|gCg/gTg|p.Ala211Val/c.632C>T|292|dapA|protein_coding|CODING|ACT40025|1|1),upstream_gene_variant(MODIFIER||777||190|gcvR|protein_coding|CODING|ACT40026||1),upstream_gene_variant(MODIFIER||1349||156|bcp|protein_coding|CODING|ACT40027||1),upstream_gene_variant(MODIFIER||3270||671|ypfI|protein_coding|CODING|ACT40021||1),upstream_gene_variant(MODIFIER||2072||205|…	865	547	COG0329	EM	YES	2519710	2520588	-	C632T	-349.98	-348.48	3.89109e-09	4.28166e-09	201.91	208.85	0.5112	0.3166	569-654	0.0378	-0.0021	574-638	0.0774	0.890094	0.90825
2522213	T	C	SNP	missense_variant	MODERATE	gTc/gCc	p.Val62Ala/c.185T>C	hyfA	EFF=missense_variant(MODERATE|MISSENSE|gTc/gCc|p.Val62Ala/c.185T>C|205|hyfA|protein_coding|CODING|ACT40028|1|1),upstream_gene_variant(MODIFIER||4648||287|ypfJ|protein_coding|CODING|ACT40022||1),upstream_gene_variant(MODIFIER||433||672|hyfB|protein_coding|CODING|ACT40029||1),upstream_gene_variant(MODIFIER||3767||237|purC|protein_coding|CODING|ACT40023||1),upstream_gene_variant(MODIFIER||2520||344|…	0	13	COG1142	C	NO	2522029	2522646	+	T185C	-240.69	-242.5	1.05227e-07	3.15832e-07	186.12	187.77	0.5558	0.0074	152-260	0.8635	0.9749	105-261	0.8518	0.96996	0.953391
2526883	T	C	SNP	missense_variant	MODERATE	aTg/aCg	p.Met387Thr/c.1160T>C	hyfD	EFF=missense_variant(MODERATE|MISSENSE|aTg/aCg|p.Met387Thr/c.1160T>C|449|hyfD|protein_coding|CODING|ACT40030|1|1),upstream_gene_variant(MODIFIER||205||216|hyfE|protein_coding|CODING|ACT40031||1),upstream_gene_variant(MODIFIER||860||526|hyfF|protein_coding|CODING|ACT40032||1),upstream_gene_variant(MODIFIER||2430||555|hyfG|protein_coding|CODING|ACT40033||1|WARNING_TRANSCRIPT_NO_START_CODON),upstrea…	0	25	COG1009	CP	NO	2525724	2527073	+	T1160C	-626.53	-626.53	8.3544e-14	8.42614e-14	199.67	199.84	0.5934	0	1125-1175	0.9999	1	1125-1175	0.9991	0.854858	0.889344
2528828	G	A	SNP	synonymous_variant	LOW	ctG/ctA	p.Leu362Leu/c.1086G>A	hyfF	EFF=synonymous_variant(LOW|SILENT|ctG/ctA|p.Leu362Leu/c.1086G>A|526|hyfF|protein_coding|CODING|ACT40032|1|1),upstream_gene_variant(MODIFIER||485||555|hyfG|protein_coding|CODING|ACT40033||1|WARNING_TRANSCRIPT_NO_START_CODON),upstream_gene_variant(MODIFIER||2162||179|hyfH|protein_coding|CODING|ACT40034||1),upstream_gene_variant(MODIFIER||2698||252|hyfI|protein_coding|CODING|ACT40035||1),upstream_ge…	1	40	COG0651	CP	NO	2527743	2529323	+	G1086A-G1549A	-690.62	-687.97	3.96644e-14	4.89256e-14	350.6	366.56	0.5647	0.0616	904-1094	0.4359	0.6923	904-968	0.4242	0.966841	0.906963
2529291	G	A	SNP	missense_variant	MODERATE	Gca/Aca	p.Ala517Thr/c.1549G>A	hyfF	EFF=missense_variant(MODERATE|MISSENSE|Gca/Aca|p.Ala517Thr/c.1549G>A|526|hyfF|protein_coding|CODING|ACT40032|1|1),upstream_gene_variant(MODIFIER||22||555|hyfG|protein_coding|CODING|ACT40033||1|WARNING_TRANSCRIPT_NO_START_CODON),upstream_gene_variant(MODIFIER||1699||179|hyfH|protein_coding|CODING|ACT40034||1),upstream_gene_variant(MODIFIER||2235||252|hyfI|protein_coding|CODING|ACT40035||1),upstrea…	1	40	COG0651	CP	NO	2527743	2529323	+	G1086A-G1549A	-690.62	-687.97	3.96644e-14	4.89256e-14	350.6	366.56	0.5647	0.0616	904-1094	0.4359	0.6923	904-968	0.4242	0.966841	0.906963
2529765	G	A	SNP	synonymous_variant	LOW	ctG/ctA	p.Leu151Leu/c.453G>A	hyfG	EFF=synonymous_variant(LOW|SILENT|ctG/ctA|p.Leu151Leu/c.453G>A|555|hyfG|protein_coding|CODING|ACT40033|1|1|WARNING_TRANSCRIPT_NO_START_CODON),upstream_gene_variant(MODIFIER||1225||179|hyfH|protein_coding|CODING|ACT40034||1),upstream_gene_variant(MODIFIER||1761||252|hyfI|protein_coding|CODING|ACT40035||1),upstream_gene_variant(MODIFIER||2512||137|hyfJ|protein_coding|CODING|ACT40036||1),upstream_ge…	1	29	COG3262	C	NO	2529313	2530980	+	G453A	-703.43	-703.43	1.08009e-18	1.56455e-18	281.41	280.14	0.581	0.0254	296-453	0.6734	0.8712	407-463	0.638	0.999563	0.997602
2531806	G	A	SNP	missense_variant	MODERATE	cGg/cAg	p.Arg94Gln/c.281G>A	hyfI	EFF=missense_variant(MODERATE|MISSENSE|cGg/cAg|p.Arg94Gln/c.281G>A|252|hyfI|protein_coding|CODING|ACT40035|1|1),upstream_gene_variant(MODIFIER||471||137|hyfJ|protein_coding|CODING|ACT40036||1),upstream_gene_variant(MODIFIER||920||668|hyfR|protein_coding|CODING|ACT40037||1),upstream_gene_variant(MODIFIER||2948||282|focB|protein_coding|CODING|ACT40038||1),downstream_gene_variant(MODIFIER||4733||449…	1	25	COG3260	C	NO	2531526	2532284	+	G281A	-312.47	-313.27	9.19653e-10	9.52092e-10	240.91	240.57	0.5661	0.0001	252-301	0.9977	0.9999	368-420	0.9946	0.999991	0.999989
2541088	T	C	SNP	missense_variant	MODERATE	gAc/gGc	p.Asp202Gly/c.605A>G	upp	EFF=missense_variant(MODERATE|MISSENSE|gAc/gGc|p.Asp202Gly/c.605A>G|208|upp|protein_coding|CODING|ACT40044|1|1),upstream_gene_variant(MODIFIER||4387||353|perM|protein_coding|CODING|ACT40039||1),upstream_gene_variant(MODIFIER||929||345|purM|protein_coding|CODING|ACT40045||1|WARNING_TRANSCRIPT_NO_START_CODON),upstream_gene_variant(MODIFIER||1966||212|purN|protein_coding|CODING|ACT40046||1),upstream…	929	491	COG0035	F	NO	2541066	2541692	-	A605G	-257.49	-262.33	1.1442e-06	8.89945e-06	175.48	102.37	0.5426	0.194	443-492	0.0807	0.3983	450-499	0.1508	0.957163	0.861787
2542634	T	C	SNP	synonymous_variant	LOW	tgT/tgC	p.Cys206Cys/c.618T>C	purM	EFF=synonymous_variant(LOW|SILENT|tgT/tgC|p.Cys206Cys/c.618T>C|345|purM|protein_coding|CODING|ACT40045|1|1|WARNING_TRANSCRIPT_NO_START_CODON),upstream_gene_variant(MODIFIER||420||212|purN|protein_coding|CODING|ACT40046||1),upstream_gene_variant(MODIFIER||1229||688|ppk|protein_coding|CODING|ACT40047||1),upstream_gene_variant(MODIFIER||2993||248|hda|protein_coding|CODING|ACT40042||1|WARNING_TRANSCR…	37	187	COG0150	F	NO	2542017	2543054	+	T618C	-439.83	-441.28	1.74299e-11	6.78075e-12	162.05	128.76	0.5312	0.0257	605-654	0.6706	0.9069	605-659	0.6986	0.863397	0.678967
2545210	G	A	SNP	missense_variant	MODERATE	Gtc/Atc	p.Val450Ile/c.1348G>A	ppk	EFF=missense_variant(MODERATE|MISSENSE|Gtc/Atc|p.Val450Ile/c.1348G>A|688|ppk|protein_coding|CODING|ACT40047|1|1),upstream_gene_variant(MODIFIER||724||513|ppx|protein_coding|CODING|ACT40048||1),upstream_gene_variant(MODIFIER||4230||429|uraA|protein_coding|CODING|ACT40043||1),upstream_gene_variant(MODIFIER||3518||208|upp|protein_coding|CODING|ACT40044||1),upstream_gene_variant(MODIFIER||4899||63|yf…	67	79	COG0855	P	NO	2543863	2545929	+	G1348A	-770.67	-769.04	5.21606e-22	2.69084e-22	576.49	588.46	0.5012	0.245	1312-1377	0.0712	-0.009	1319-1371	0.0758	0.906834	0.802278
2551346	G	A	SNP	missense_variant	MODERATE	Gcc/Acc	p.Ala68Thr/c.202G>A	yfgI	EFF=missense_variant(MODERATE|MISSENSE|Gcc/Acc|p.Ala68Thr/c.202G>A|179|yfgI|protein_coding|CODING|ACT40052|1|1),upstream_gene_variant(MODIFIER||1589||747|yfgF|protein_coding|CODING|ACT40049||1),upstream_gene_variant(MODIFIER||3705||456|xseA|protein_coding|CODING|ACT40055||1),downstream_gene_variant(MODIFIER||431||525|guaA|protein_coding|CODING|ACT40053||1),downstream_gene_variant(MODIFIER||3871||…	4	26	NA	NA	NO	2551145	2551684	+	G202A	-180.56	-176.32	1.09886e-06	1.21375e-06	59.32	58.07	0.4988	0.0168	185-234	0.713	0.9148	196-246	0.6914	0.991367	0.989921
2557594	G	A	SNP	synonymous_variant	LOW	gaC/gaT	p.Asp194Asp/c.582C>T	yfgK	EFF=synonymous_variant(LOW|SILENT|gaC/gaT|p.Asp194Asp/c.582C>T|490|yfgK|protein_coding|CODING|ACT40057|1|1),upstream_gene_variant(MODIFIER||4240||525|guaA|protein_coding|CODING|ACT40053||1),upstream_gene_variant(MODIFIER||2705||488|guaB|protein_coding|CODING|ACT40054||1),upstream_gene_variant(MODIFIER||961||71|yfgJ|protein_coding|CODING|ACT40056||1),downstream_gene_variant(MODIFIER||699||392|yfgL…	465	184	COG3539	NU	YES	2556703	2558175	-	C582T	-586.12	-584.38	1.02334e-16	9.39094e-17	262.61	264.99	0.5362	0.0082	571-620	0.8584	0.9569	529-588	0.8072	0.985924	0.979182
2559473	G	A	SNP	upstream_gene_variant	MODIFIER	.	.	.	EFF=upstream_gene_variant(MODIFIER||4584||488|guaB|protein_coding|CODING|ACT40054||1),upstream_gene_variant(MODIFIER||2840||71|yfgJ|protein_coding|CODING|ACT40056||1),upstream_gene_variant(MODIFIER||1298||490|yfgK|protein_coding|CODING|ACT40057||1),upstream_gene_variant(MODIFIER||2||392|yfgL|protein_coding|CODING|ACT40058||1),downstream_gene_variant(MODIFIER||9||206|yfgM|protein_coding|CODING|ACT…	.	.	NA	NA	.	.	.	.	.	.	.	.	.	.	.	.	.	.	.	.	.	.	.	.
2560516	T	C	SNP	synonymous_variant	LOW	gaA/gaG	p.Glu293Glu/c.879A>G	hisS	EFF=synonymous_variant(LOW|SILENT|gaA/gaG|p.Glu293Glu/c.879A>G|424|hisS|protein_coding|CODING|ACT40060|1|1|WARNING_TRANSCRIPT_NO_START_CODON),upstream_gene_variant(MODIFIER||3883||71|yfgJ|protein_coding|CODING|ACT40056||1),upstream_gene_variant(MODIFIER||2341||490|yfgK|protein_coding|CODING|ACT40057||1),upstream_gene_variant(MODIFIER||1045||392|yfgL|protein_coding|CODING|ACT40058||1),upstream_gen…	630	262	COG0124	J	YES	2560120	2561394	-	A879G	-562.14	-567.44	6.53254e-12	1.70719e-11	261.05	197.25	0.5362	0.0091	830-908	0.8468	0.9844	774-898	0.8946	0.991806	0.918357
2575915	T	C	SNP	missense_variant	MODERATE	atA/atG	p.Ile421Met/c.1263A>G	pepB	EFF=missense_variant(MODERATE|MISSENSE|atA/atG|p.Ile421Met/c.1263A>G|427|pepB|protein_coding|CODING|ACT40069|1|1),upstream_gene_variant(MODIFIER||2809||1653|yfhM|protein_coding|CODING|ACT40066||1),upstream_gene_variant(MODIFIER||163||258|sseB|protein_coding|CODING|ACT40068||1),downstream_gene_variant(MODIFIER||1320||66|yfhJ|protein_coding|CODING|ACT40070||1),downstream_gene_variant(MODIFIER||1532…	65	60	COG0260	E	NO	2575894	2577177	-	A1263G	-576.13	-575.93	2.87734e-14	1.74242e-14	269.32	297.98	0.5856	0.1406	1203-1283	0.1485	0.2168	1213-1283	0.0968	0.994618	0.952718
2579289	T	C	SNP	missense_variant	MODERATE	Atg/Gtg	p.Met116Val/c.346A>G	hscA	EFF=missense_variant(MODERATE|MISSENSE|Atg/Gtg|p.Met116Val/c.346A>G|616|hscA|protein_coding|CODING|ACT40072|1|1),upstream_gene_variant(MODIFIER||3537||258|sseB|protein_coding|CODING|ACT40068||1),upstream_gene_variant(MODIFIER||2112||427|pepB|protein_coding|CODING|ACT40069||1),upstream_gene_variant(MODIFIER||1854||66|yfhJ|protein_coding|CODING|ACT40070||1),upstream_gene_variant(MODIFIER||1507||111…	164	47	COG0443	O	NO	2577784	2579634	-	A346G	-897.91	-899.11	1.05105e-19	1.02834e-19	243.13	297.13	0.591	0.1556	274-414	0.1643	0.27	322-412	0.1619	0.974924	0.916652
2583226	T	C	SNP	upstream_gene_variant	MODIFIER	.	.	.	EFF=upstream_gene_variant(MODIFIER||915||267|suhB|protein_coding|CODING|ACT40079||1),upstream_gene_variant(MODIFIER||3592||616|hscA|protein_coding|CODING|ACT40072||1),upstream_gene_variant(MODIFIER||1836||293|yfhR|protein_coding|CODING|ACT40080||1),upstream_gene_variant(MODIFIER||3060||171|hscB|protein_coding|CODING|ACT40073||1),upstream_gene_variant(MODIFIER||2641||107|iscA|protein_coding|CODING…	.	.	NA	NA	.	.	.	.	.	.	.	.	.	.	.	.	.	.	.	.	.	.	.	.
2590473	C	T	SNP	missense_variant	MODERATE	aCc/aTc	p.Thr248Ile/c.743C>T	hcaE	EFF=missense_variant(MODERATE|MISSENSE|aCc/aTc|p.Thr248Ile/c.743C>T|453|hcaE|protein_coding|CODING|ACT40084|1|1),upstream_gene_variant(MODIFIER||616||172|hcaF|protein_coding|CODING|ACT40085||1),upstream_gene_variant(MODIFIER||1134||106|hcaC|protein_coding|CODING|ACT40086||1),upstream_gene_variant(MODIFIER||1451||270|hcaB|protein_coding|CODING|ACT40087||1),upstream_gene_variant(MODIFIER||2273||400…	4	37	COG4638	PR	NO	2589731	2591092	+	C743T	-544	-544.92	1.06856e-13	4.02927e-13	411.65	367.23	0.5387	0.0677	743-897	0.4072	0.7879	743-838	0.5247	0.997755	0.991387
2596834	C	T	SNP	missense_variant	MODERATE	Gga/Aga	p.Gly231Arg/c.691G>A	yphD	EFF=missense_variant(MODERATE|MISSENSE|Gga/Aga|p.Gly231Arg/c.691G>A|332|yphD|protein_coding|CODING|ACT40092|1|1),upstream_gene_variant(MODIFIER||1447||290|yphB|protein_coding|CODING|ACT40090||1),upstream_gene_variant(MODIFIER||374||353|yphC|protein_coding|CODING|ACT40091||1),downstream_gene_variant(MODIFIER||4907||106|hcaC|protein_coding|CODING|ACT40086||1),downstream_gene_variant(MODIFIER||715||…	1	28	COG1172	G	NO	2596526	2597524	-	G691A	-469.17	-469.85	2.42022e-13	5.09159e-13	135.86	128.67	0.586	0.0924	645-694	0.3114	0.4858	646-695	0.2688	0.906255	0.758707
2599177	T	C	SNP	missense_variant	MODERATE	gAc/gGc	p.Asp297Gly/c.890A>G	yphF	EFF=missense_variant(MODERATE|MISSENSE|gAc/gGc|p.Asp297Gly/c.890A>G|327|yphF|protein_coding|CODING|ACT40094|1|1),upstream_gene_variant(MODIFIER||3790||290|yphB|protein_coding|CODING|ACT40090||1),upstream_gene_variant(MODIFIER||2717||353|yphC|protein_coding|CODING|ACT40091||1),upstream_gene_variant(MODIFIER||1653||332|yphD|protein_coding|CODING|ACT40092||1),upstream_gene_variant(MODIFIER||4385||39…	2	26	COG1879	G	NO	2599083	2600066	-	C145T-A890G	-351.63	-350.1	2.12749e-11	3.70045e-11	263.19	299.5	0.4593	0.0618	92-146	0.3962	0.5723	281-441	0.3131	0.95094	0.918935
2599922	G	A	SNP	stop_gained	HIGH	Cag/Tag	p.Gln49*/c.145C>T	yphF	EFF=stop_gained(HIGH|NONSENSE|Cag/Tag|p.Gln49*/c.145C>T|327|yphF|protein_coding|CODING|ACT40094|1|1),upstream_gene_variant(MODIFIER||4535||290|yphB|protein_coding|CODING|ACT40090||1),upstream_gene_variant(MODIFIER||3462||353|yphC|protein_coding|CODING|ACT40091||1),upstream_gene_variant(MODIFIER||2398||332|yphD|protein_coding|CODING|ACT40092||1),upstream_gene_variant(MODIFIER||3640||397|yphH|prote…	2	26	COG1879	G	NO	2599083	2600066	-	C145T-A890G	-351.63	-350.1	2.12749e-11	3.70045e-11	263.19	299.5	0.4593	0.0618	92-146	0.3962	0.5723	281-441	0.3131	0.95094	0.918935
2612628	T	C	SNP	synonymous_variant	LOW	gcA/gcG	p.Ala1211Ala/c.3633A>G	purL	EFF=synonymous_variant(LOW|SILENT|gcA/gcG|p.Ala1211Ala/c.3633A>G|1295|purL|protein_coding|CODING|ACT40103|1|1),upstream_gene_variant(MODIFIER||4521||112|glnB|protein_coding|CODING|ACT40099||1),upstream_gene_variant(MODIFIER||3126||444|yfhA|protein_coding|CODING|ACT40100||1),upstream_gene_variant(MODIFIER||2423||237|yfhG|protein_coding|CODING|ACT40101||1),upstream_gene_variant(MODIFIER||831||475|y…	45	192	COG0046	F	NO	2612373	2616260	-	A3633G	-1763.6	-1762.74	4.34837e-40	2.09901e-40	852.08	972.39	0.5586	0.0378	3633-3705	0.5761	0.8861	3633-3686	0.6622	0.994522	0.969299
2618689	C	T	SNP	missense_variant	MODERATE	Cgg/Tgg	p.Arg138Trp/c.412C>T	insB-19	EFF=missense_variant(MODERATE|MISSENSE|Cgg/Tgg|p.Arg138Trp/c.412C>T|167|insB-19|protein_coding|CODING|ACT40105|1|1),upstream_gene_variant(MODIFIER||1562||282|yfhH|protein_coding|CODING|ACT40108||1),upstream_gene_variant(MODIFIER||2466||86|yfhL|protein_coding|CODING|ACT40109||1),upstream_gene_variant(MODIFIER||2429||1295|purL|protein_coding|CODING|ACT40103||1),downstream_gene_variant(MODIFIER||157…	NA	NA	NA	NA	NO	2618278	2618781	+	C412T-A485G	-211.87	-209.85	2.94969e-05	2.86671e-05	83.31	85.99	0.5256	0.0185	436-485	0.742	0.9547	436-485	0.7974	0.975118	0.945442
2618762	A	G	SNP	missense_variant	MODERATE	aAc/aGc	p.Asn162Ser/c.485A>G	insB-19	EFF=missense_variant(MODERATE|MISSENSE|aAc/aGc|p.Asn162Ser/c.485A>G|167|insB-19|protein_coding|CODING|ACT40105|1|1),upstream_gene_variant(MODIFIER||1489||282|yfhH|protein_coding|CODING|ACT40108||1),upstream_gene_variant(MODIFIER||2393||86|yfhL|protein_coding|CODING|ACT40109||1),upstream_gene_variant(MODIFIER||2502||1295|purL|protein_coding|CODING|ACT40103||1),downstream_gene_variant(MODIFIER||84|…	NA	NA	NA	NA	NO	2618278	2618781	+	C412T-A485G	-211.87	-209.85	2.94969e-05	2.86671e-05	83.31	85.99	0.5256	0.0185	436-485	0.742	0.9547	436-485	0.7974	0.975118	0.945442
2619961	G	A	SNP	missense_variant	MODERATE	Cgc/Tgc	p.Arg7Cys/c.19C>T	yfhB	EFF=missense_variant(MODERATE|MISSENSE|Cgc/Tgc|p.Arg7Cys/c.19C>T|190|yfhB|protein_coding|CODING|ACT40107|1|1),upstream_gene_variant(MODIFIER||290||282|yfhH|protein_coding|CODING|ACT40108||1),upstream_gene_variant(MODIFIER||1194||86|yfhL|protein_coding|CODING|ACT40109||1),upstream_gene_variant(MODIFIER||3701||1295|purL|protein_coding|CODING|ACT40103||1),upstream_gene_variant(MODIFIER||579||178|tad…	47	69	COG0560	E	NO	2619407	2619979	-	C19T	-248.6	-246.5	7.12805e-06	7.23272e-06	128.66	128.66	0.516	0.0592	1966-06-01	0.375	0.4863	1952-03-01	0.1984	1	1
2620050	T	C	SNP	upstream_gene_variant	MODIFIER	.	.	.	EFF=upstream_gene_variant(MODIFIER||201||282|yfhH|protein_coding|CODING|ACT40108||1),upstream_gene_variant(MODIFIER||1105||86|yfhL|protein_coding|CODING|ACT40109||1),upstream_gene_variant(MODIFIER||3790||1295|purL|protein_coding|CODING|ACT40103||1),upstream_gene_variant(MODIFIER||668||178|tadA|protein_coding|CODING|ACT40106||1),upstream_gene_variant(MODIFIER||71||190|yfhB|protein_coding|CODING|AC…	.	.	NA	NA	.	.	.	.	.	.	.	.	.	.	.	.	.	.	.	.	.	.	.	.
2625265	T	C	SNP	synonymous_variant	LOW	ggA/ggG	p.Gly97Gly/c.291A>G	rncS	EFF=synonymous_variant(LOW|SILENT|ggA/ggG|p.Gly97Gly/c.291A>G|226|rncS|protein_coding|CODING|ACT40114|1|1),upstream_gene_variant(MODIFIER||2775||126|acpS|protein_coding|CODING|ACT40110||1),upstream_gene_variant(MODIFIER||2044||243|pdxJ|protein_coding|CODING|ACT40111||1),upstream_gene_variant(MODIFIER||1304||242|recO|protein_coding|CODING|ACT40112||1),upstream_gene_variant(MODIFIER||387||301|era|p…	2	171	COG0571	K	NO	2624875	2625555	-	A291G	-269.31	-269.19	2.87388e-09	8.80257e-10	190.54	178.16	0.4863	0.0185	261-310	0.6924	0.9147	261-310	0.691	0.998543	0.964247
2637119	C	G	SNP	missense_variant	MODERATE	gaC/gaG	p.Asp68Glu/c.204C>G	yfiK	EFF=missense_variant(MODERATE|MISSENSE|gaC/gaG|p.Asp68Glu/c.204C>G|195|yfiK|protein_coding|CODING|ACT40125|1|1|WARNING_TRANSCRIPT_NO_START_CODON),upstream_gene_variant(MODIFIER||1128||229|ung|protein_coding|CODING|ACT40127||1),upstream_gene_variant(MODIFIER||2862||245|yfiC|protein_coding|CODING|ACT40122||1),upstream_gene_variant(MODIFIER||3109||139|trxC|protein_coding|CODING|ACT40129||1),upstream…	4	35	COG1280	E	NO	2636916	2637503	+	C204G	-230.55	-233.74	2.58311e-08	1.07897e-07	162.1	153.14	0.5037	0.2376	165-214	0.0761	0.5478	165-215	0.3088	0.956206	0.965099
2658960	G	A	SNP	upstream_gene_variant	MODIFIER	.	.	.	EFF=upstream_gene_variant(MODIFIER||47||15|pheL|protein_coding|CODING|ACT40140||1),upstream_gene_variant(MODIFIER||192||386|pheA|protein_coding|CODING|ACT40141||1),upstream_gene_variant(MODIFIER||3379||857|clpB|protein_coding|CODING|ACT40135||1),upstream_gene_variant(MODIFIER||2518||243|yfiH|protein_coding|CODING|ACT40136||1),upstream_gene_variant(MODIFIER||1541||326|rluD|protein_coding|CODING|AC…	.	.	NA	NA	.	.	.	.	.	.	.	.	.	.	.	.	.	.	.	.	.	.	.	.
2668503	G	A	SNP	synonymous_variant	LOW	caC/caT	p.His196His/c.588C>T	ffh	EFF=synonymous_variant(LOW|SILENT|caC/caT|p.His196His/c.588C>T|453|ffh|protein_coding|CODING|ACT40152|1|1),upstream_gene_variant(MODIFIER||679||288|ypjD|protein_coding|CODING|ACT40153||1),upstream_gene_variant(MODIFIER||1656||398|yfjD|protein_coding|CODING|ACT40154||1),upstream_gene_variant(MODIFIER||2566||115|rplS|protein_coding|CODING|ACT40148||1),upstream_gene_variant(MODIFIER||1757||255|trmD|…	44	91	COG0494	LR	NO	2667729	2669090	-	C588T	-586.71	-584.69	4.68298e-14	1.72528e-14	242.93	267.23	0.5461	0.1194	520-597	0.2356	0.1682	547-597	0.1248	0.995305	0.96266
2681961	G	A	SNP	synonymous_variant	LOW	ccG/ccA	p.Pro198Pro/c.594G>A	ECB_02512	EFF=synonymous_variant(LOW|SILENT|ccG/ccA|p.Pro198Pro/c.594G>A|298|ECB_02512|protein_coding|CODING|ACT40165|1|1),upstream_gene_variant(MODIFIER||702||91|insA-20|protein_coding|CODING|ACT40166||1|WARNING_TRANSCRIPT_NO_START_CODON),upstream_gene_variant(MODIFIER||896||167|insB-20|protein_coding|CODING|ACT40167||1),upstream_gene_variant(MODIFIER||1705||325|csiD|protein_coding|CODING|ACT40168||1),ups…	NA	NA	NA	NA	NO	2681368	2682264	+	G594A	-226.32	-226.55	2.60728e-10	2.61737e-10	140.27	140.01	0.3392	0.0739	403-751	0.3031	0.6088	578-628	0.3262	0.999862	0.997766
2690229	G	A	SNP	stop_gained	HIGH	tgG/tgA	p.Trp408*/c.1224G>A	gabP	EFF=stop_gained(HIGH|NONSENSE|tgG/tgA|p.Trp408*/c.1224G>A|466|gabP|protein_coding|CODING|ACT40172|1|1),upstream_gene_variant(MODIFIER||198||220|ygaE|protein_coding|CODING|ACT40173||1),upstream_gene_variant(MODIFIER||1735||99|ygaV|protein_coding|CODING|ACT40176||1),upstream_gene_variant(MODIFIER||2044||174|ygaP|protein_coding|CODING|ACT40177||1),upstream_gene_variant(MODIFIER||3687||149|ygaW|prote…	1	46	COG1113	E	NO	2689006	2690406	+	G1224A	-579.72	-576.16	2.54523e-15	4.78089e-16	250.02	290.64	0.4894	0.075	1223-1273	0.3344	0.7561	1223-1273	0.4725	0.904509	0.822511
2692997	T	C	SNP	synonymous_variant	LOW	ccA/ccG	p.Pro84Pro/c.252A>G	stpA	EFF=synonymous_variant(LOW|SILENT|ccA/ccG|p.Pro84Pro/c.252A>G|134|stpA|protein_coding|CODING|ACT40178|1|1),upstream_gene_variant(MODIFIER||919||149|ygaW|protein_coding|CODING|ACT40179||1),upstream_gene_variant(MODIFIER||1889||113|ygaM|protein_coding|CODING|ACT40181||1),upstream_gene_variant(MODIFIER||2478||81|nrdH|protein_coding|CODING|ACT40182||1),upstream_gene_variant(MODIFIER||2720||136|nrdI|p…	747	132	COG2916	R	NO	2692844	2693248	-	A158G-A252G	-144.37	-146.64	0.000888124	0.000729473	35.19	45.04	0.4765	0.1141	151-217	0.2195	0.7655	153-217	0.493	0.947839	0.945458
2693091	T	C	SNP	missense_variant	MODERATE	gAg/gGg	p.Glu53Gly/c.158A>G	stpA	EFF=missense_variant(MODERATE|MISSENSE|gAg/gGg|p.Glu53Gly/c.158A>G|134|stpA|protein_coding|CODING|ACT40178|1|1),upstream_gene_variant(MODIFIER||825||149|ygaW|protein_coding|CODING|ACT40179||1),upstream_gene_variant(MODIFIER||1795||113|ygaM|protein_coding|CODING|ACT40181||1),upstream_gene_variant(MODIFIER||2384||81|nrdH|protein_coding|CODING|ACT40182||1),upstream_gene_variant(MODIFIER||2626||136|n…	747	132	COG2916	R	NO	2692844	2693248	-	A158G-A252G	-144.37	-146.64	0.000888124	0.000729473	35.19	45.04	0.4765	0.1141	151-217	0.2195	0.7655	153-217	0.493	0.947839	0.945458
2712032	T	C	SNP	missense_variant	MODERATE	Agt/Ggt	p.Ser111Gly/c.331A>G	yqaB	EFF=missense_variant(MODERATE|MISSENSE|Agt/Ggt|p.Ser111Gly/c.331A>G|188|yqaB|protein_coding|CODING|ACT40198|1|1),upstream_gene_variant(MODIFIER||2440||171|ygaG|protein_coding|CODING|ACT40195||1),upstream_gene_variant(MODIFIER||734||518|gshA|protein_coding|CODING|ACT40196||1),upstream_gene_variant(MODIFIER||233||142|yqaA|protein_coding|CODING|ACT40197||1|WARNING_TRANSCRIPT_NO_START_CODON),downstre…	129	75	COG0637	R	NO	2711796	2712362	-	A331G	-245.62	-246	2.0731e-05	2.47391e-05	80.14	78.58	0.5461	0.0113	321-370	0.8187	0.9862	321-370	0.9018	0.998091	0.999085
2716283	G	C	SNP	synonymous_variant	LOW	ggC/ggG	p.Gly196Gly/c.588C>G	alaS	EFF=synonymous_variant(LOW|SILENT|ggC/ggG|p.Gly196Gly/c.588C>G|876|alaS|protein_coding|CODING|ACT40200|1|1),upstream_gene_variant(MODIFIER||4985||518|gshA|protein_coding|CODING|ACT40196||1),upstream_gene_variant(MODIFIER||4484||142|yqaA|protein_coding|CODING|ACT40197||1|WARNING_TRANSCRIPT_NO_START_CODON),upstream_gene_variant(MODIFIER||3921||188|yqaB|protein_coding|CODING|ACT40198||1),upstream_ge…	764	247	COG0013	J	NO	2714240	2716870	-	C588G	-1139.78	-1139.56	5.69526e-27	5.84385e-27	618.52	617.1	0.5586	0.0187	578-695	0.7365	0.8928	574-695	0.6735	0.992122	0.968194
2722289	G	A	SNP	synonymous_variant	LOW	caG/caA	p.Gln23Gln/c.69G>A	srlB	EFF=synonymous_variant(LOW|SILENT|caG/caA|p.Gln23Gln/c.69G>A|123|srlB|protein_coding|CODING|ACT40207|1|1),upstream_gene_variant(MODIFIER||4791||166|recX|protein_coding|CODING|ACT40201||1),upstream_gene_variant(MODIFIER||307||259|srlD|protein_coding|CODING|ACT40208||1),upstream_gene_variant(MODIFIER||1192||119|gutM|protein_coding|CODING|ACT40209||1),upstream_gene_variant(MODIFIER||3661||353|recA|p…	9	41	COG3731	G	NO	2722221	2722592	+	G69A-T317C	-147.86	-146.05	0.000192918	0.000179113	57.61	76.94	0.5538	0.021	51-100	0.7292	0.8912	56-123	0.6756	0.962838	0.912893
2722537	T	C	SNP	missense_variant	MODERATE	gTa/gCa	p.Val106Ala/c.317T>C	srlB	EFF=missense_variant(MODERATE|MISSENSE|gTa/gCa|p.Val106Ala/c.317T>C|123|srlB|protein_coding|CODING|ACT40207|1|1),upstream_gene_variant(MODIFIER||59||259|srlD|protein_coding|CODING|ACT40208||1),upstream_gene_variant(MODIFIER||944||119|gutM|protein_coding|CODING|ACT40209||1),upstream_gene_variant(MODIFIER||3909||353|recA|protein_coding|CODING|ACT40202||1),upstream_gene_variant(MODIFIER||1370||257|s…	9	41	COG3731	G	NO	2722221	2722592	+	G69A-T317C	-147.86	-146.05	0.000192918	0.000179113	57.61	76.94	0.5538	0.021	51-100	0.7292	0.8912	56-123	0.6756	0.962838	0.912893
2725311	G	A	SNP	synonymous_variant	LOW	gcG/gcA	p.Ala213Ala/c.639G>A	gutQ	EFF=synonymous_variant(LOW|SILENT|gcG/gcA|p.Ala213Ala/c.639G>A|321|gutQ|protein_coding|CODING|ACT40211|1|1),upstream_gene_variant(MODIFIER||4876||361|mltB|protein_coding|CODING|ACT40204||1),upstream_gene_variant(MODIFIER||2025||479|norV|protein_coding|CODING|ACT40213||1),upstream_gene_variant(MODIFIER||3461||377|ygbD|protein_coding|CODING|ACT40214||1),downstream_gene_variant(MODIFIER||324||504|yg…	29	38	COG0794	M	NO	2724673	2725638	+	G639A	-430.53	-431.13	1.04156e-12	1.09774e-12	213.72	210.83	0.6135	0.0002	593-642	0.9946	0.9997	593-642	0.989	0.999947	0.998868
2725878	G	A	SNP	synonymous_variant	LOW	ggC/ggT	p.Gly424Gly/c.1272C>T	ygaA	EFF=synonymous_variant(LOW|SILENT|ggC/ggT|p.Gly424Gly/c.1272C>T|504|ygaA|protein_coding|CODING|ACT40212|1|1),upstream_gene_variant(MODIFIER||1458||479|norV|protein_coding|CODING|ACT40213||1),upstream_gene_variant(MODIFIER||2894||377|ygbD|protein_coding|CODING|ACT40214||1),downstream_gene_variant(MODIFIER||4624||187|srlA|protein_coding|CODING|ACT40205||1),downstream_gene_variant(MODIFIER||3668||31…	19	31	COG3604	KT	NO	2725635	2727149	-	C1272T	-723.89	-726.65	4.27354e-16	5.51409e-16	270.23	264.4	0.5736	0.256	1211-1363	0.0645	-0.258	1224-1314	0.0324	0.930999	0.903094
2739783	T	C	SNP	missense_variant	MODERATE	Acc/Gcc	p.Thr517Ala/c.1549A>G	hycE	EFF=missense_variant(MODERATE|MISSENSE|Acc/Gcc|p.Thr517Ala/c.1549A>G|569|hycE|protein_coding|CODING|ACT40224|1|1),upstream_gene_variant(MODIFIER||1880||156|hycI|protein_coding|CODING|ACT40220||1|WARNING_TRANSCRIPT_NO_START_CODON),upstream_gene_variant(MODIFIER||1477||136|hycH|protein_coding|CODING|ACT40221||1),upstream_gene_variant(MODIFIER||713||255|hycG|protein_coding|CODING|ACT40222||1),upstre…	0	15	COG3262	C	NO	2739622	2741331	-	A1549G	-747.77	-747.77	4.33224e-17	1.57353e-17	502.76	585.08	0.5856	0.1693	1408-1583	0.1401	0.4526	1434-1574	0.2397	0.980319	0.959134
2748226	A	G	SNP	missense_variant	MODERATE	cAg/cGg	p.Gln24Arg/c.71A>G	hypE	EFF=missense_variant(MODERATE|MISSENSE|cAg/cGg|p.Gln24Arg/c.71A>G|322|hypE|protein_coding|CODING|ACT40233|1|1),upstream_gene_variant(MODIFIER||4125||608|hycC|protein_coding|CODING|ACT40226||1),upstream_gene_variant(MODIFIER||972||692|fhlA|protein_coding|CODING|ACT40234||1),upstream_gene_variant(MODIFIER||3517||203|hycB|protein_coding|CODING|ACT40227||1|WARNING_TRANSCRIPT_NO_START_CODON),upstream_…	5	16	COG0309	O	NO	2748156	2749124	+	A71G	-474.93	-474.37	5.01058e-08	4.45492e-08	172.42	178.98	0.5535	0.0008	40-90	0.9801	0.9978	66-141	0.9708	0.998435	0.977502
2752473	A	AG	INS	frameshift_variant	HIGH	aat/aaGt	p.Asn174_Pro175fs/c.522_523insG	mutS	EFF=frameshift_variant(HIGH||aat/aaGt|p.Asn174_Pro175fs/c.522_523insG|853|mutS|protein_coding|CODING|ACT40236|1|1),upstream_gene_variant(MODIFIER||2146||218|pphB|protein_coding|CODING|ACT40237||1),upstream_gene_variant(MODIFIER||3816||302|ygbJ|protein_coding|CODING|ACT40239||1),upstream_gene_variant(MODIFIER||808||117|ygbA|protein_coding|CODING|ACT40235||1),upstream_gene_variant(MODIFIER||4721||4…	98	42	COG0249	L	NO	.	.	.	.	.	.	.	.	.	.	.	.	.	.	.	.	.	.	.
2756389	G	A	SNP	missense_variant	MODERATE	Ggc/Agc	p.Gly34Ser/c.100G>A	ygbJ	EFF=missense_variant(MODERATE|MISSENSE|Ggc/Agc|p.Gly34Ser/c.100G>A|302|ygbJ|protein_coding|CODING|ACT40239|1|1),upstream_gene_variant(MODIFIER||4723||117|ygbA|protein_coding|CODING|ACT40235||1),upstream_gene_variant(MODIFIER||806||420|ygbK|protein_coding|CODING|ACT40240||1),upstream_gene_variant(MODIFIER||2065||212|ygbL|protein_coding|CODING|ACT40241||1),upstream_gene_variant(MODIFIER||2708||258|…	1	16	COG2084	I	NO	2756290	2757198	+	G100A-G460A	-397.29	-391.28	1.57639e-07	1.16489e-07	162.97	184.39	0.5379	0.0098	100-224	0.855	0.9453	460-543	0.7934	0.978768	0.817612
2756749	G	A	SNP	missense_variant	MODERATE	Gca/Aca	p.Ala154Thr/c.460G>A	ygbJ	EFF=missense_variant(MODERATE|MISSENSE|Gca/Aca|p.Ala154Thr/c.460G>A|302|ygbJ|protein_coding|CODING|ACT40239|1|1),upstream_gene_variant(MODIFIER||446||420|ygbK|protein_coding|CODING|ACT40240||1),upstream_gene_variant(MODIFIER||1705||212|ygbL|protein_coding|CODING|ACT40241||1),upstream_gene_variant(MODIFIER||2348||258|ygbM|protein_coding|CODING|ACT40242||1),upstream_gene_variant(MODIFIER||3213||454…	1	16	COG2084	I	NO	2756290	2757198	+	G100A-G460A	-397.29	-391.28	1.57639e-07	1.16489e-07	162.97	184.39	0.5379	0.0098	100-224	0.855	0.9453	460-543	0.7934	0.978768	0.817612
2759916	T	C	SNP	upstream_gene_variant	MODIFIER	.	.	.	EFF=upstream_gene_variant(MODIFIER||46||454|ygbN|protein_coding|CODING|ACT40243||1),upstream_gene_variant(MODIFIER||3792||265|ygbI|protein_coding|CODING|ACT40238||1),downstream_gene_variant(MODIFIER||4640||218|pphB|protein_coding|CODING|ACT40237||1),downstream_gene_variant(MODIFIER||1504||330|rpoS|protein_coding|CODING|ACT40244||1),downstream_gene_variant(MODIFIER||2718||302|ygbJ|protein_coding|C…	.	.	NA	NA	.	.	.	.	.	.	.	.	.	.	.	.	.	.	.	.	.	.	.	.
2764385	T	C	SNP	missense_variant	MODERATE	Acg/Gcg	p.Thr251Ala/c.751A>G	surE	EFF=missense_variant(MODERATE|MISSENSE|Acg/Gcg|p.Thr251Ala/c.751A>G|253|surE|protein_coding|CODING|ACT40247|1|1),upstream_gene_variant(MODIFIER||1973||330|rpoS|protein_coding|CODING|ACT40244||1),upstream_gene_variant(MODIFIER||771||379|nlpD|protein_coding|CODING|ACT40245||1),upstream_gene_variant(MODIFIER||5||208|pcm|protein_coding|CODING|ACT40246||1),downstream_gene_variant(MODIFIER||4512||258|y…	178	105	NA	NA	NO	2764374	2765135	-	A751G	-333.42	-333.87	2.05165e-09	7.88226e-09	158	229.1	0.566	0.0222	705-754	0.6167	0.9103	705-754	0.6177	0.869503	0.806553
2801595	G	A	SNP	missense_variant	MODERATE	Ccg/Tcg	p.Pro329Ser/c.985C>T	relA	EFF=missense_variant(MODERATE|MISSENSE|Ccg/Tcg|p.Pro329Ser/c.985C>T|744|relA|protein_coding|CODING|ACT40282|1|1),upstream_gene_variant(MODIFIER||4726||432|eno|protein_coding|CODING|ACT40277||1),upstream_gene_variant(MODIFIER||3001||545|pyrG|protein_coding|CODING|ACT40278||1),upstream_gene_variant(MODIFIER||2390||918|barA|protein_coding|CODING|ACT40284||1),upstream_gene_variant(MODIFIER||1982||263…	24	42	COG0317	TK	NO	2800345	2802579	-	C985T	-973.55	-974.45	4.19313e-22	3.52603e-22	446.95	448.16	0.5287	0.0434	938-987	0.5385	0.9129	936-985	0.7099	0.96501	0.93365
2813243	G	A	SNP	upstream_gene_variant	MODIFIER	.	.	.	EFF=upstream_gene_variant(MODIFIER||4929||446|gudD|protein_coding|CODING|ACT40285||1),upstream_gene_variant(MODIFIER||1034||282|yqcD|protein_coding|CODING|ACT40292||1),upstream_gene_variant(MODIFIER||3568||446|gudX|protein_coding|CODING|ACT40286||1),upstream_gene_variant(MODIFIER||1994||454|ygdH|protein_coding|CODING|ACT40293||1),upstream_gene_variant(MODIFIER||2214||450|gudP|protein_coding|CODIN…	.	.	NA	NA	.	.	.	.	.	.	.	.	.	.	.	.	.	.	.	.	.	.	.	.
2815688	T	C	SNP	missense_variant	MODERATE	gTg/gCg	p.Val151Ala/c.452T>C	ygdH	EFF=missense_variant(MODERATE|MISSENSE|gTg/gCg|p.Val151Ala/c.452T>C|454|ygdH|protein_coding|CODING|ACT40293|1|1),upstream_gene_variant(MODIFIER||4659||450|gudP|protein_coding|CODING|ACT40287||1),upstream_gene_variant(MODIFIER||3775||149|yqcA|protein_coding|CODING|ACT40288||1),upstream_gene_variant(MODIFIER||1470||429|sdaC|protein_coding|CODING|ACT40294||1),upstream_gene_variant(MODIFIER||2975||26…	61	92	COG1611	R	NO	2815237	2816601	+	T452C	-517.63	-514.07	4.11837e-16	8.73448e-16	346.31	412.05	0.5436	0.1474	382-455	0.1781	0.6091	396-453	0.3535	0.954613	0.761837
2820540	G	A	SNP	missense_variant	MODERATE	gGa/gAa	p.Gly216Glu/c.647G>A	xni	EFF=missense_variant(MODERATE|MISSENSE|gGa/gAa|p.Gly216Glu/c.647G>A|281|xni|protein_coding|CODING|ACT40296|1|1),downstream_gene_variant(MODIFIER||254||383|fucO|protein_coding|CODING|ACT40297||1),downstream_gene_variant(MODIFIER||3939||454|ygdH|protein_coding|CODING|ACT40293||1),downstream_gene_variant(MODIFIER||1662||167|insB-21|protein_coding|CODING|ACT40298||1),downstream_gene_variant(MODIFIER|…	24	17	COG0258	L	NO	2819894	2820739	+	G647A	-352.97	-352.71	5.11854e-09	8.42033e-09	159.65	163.03	0.4825	0.0917	772-840	0.2586	0.3664	777-835	0.1867	0.945556	0.960251
2826025	G	A	SNP	missense_variant	MODERATE	tCg/tTg	p.Ser65Leu/c.194C>T	ECB_02649	EFF=missense_variant(MODERATE|MISSENSE|tCg/tTg|p.Ser65Leu/c.194C>T|542|ECB_02649|protein_coding|CODING|ACT40301|1|1),upstream_gene_variant(MODIFIER||4080||383|fucO|protein_coding|CODING|ACT40297||1),upstream_gene_variant(MODIFIER||3320||167|insB-21|protein_coding|CODING|ACT40298||1),upstream_gene_variant(MODIFIER||3126||91|insA-21|protein_coding|CODING|ACT40299||1|WARNING_TRANSCRIPT_NO_START_CODO…	NA	NA	NA	NA	NO	2824590	2826218	-	C194T	-686.93	-687.17	1.44749e-16	2.18653e-16	347.82	359.12	0.5406	0.0235	170-219	0.6798	0.9714	173-222	0.8422	0.986655	0.958531
2831557	C	T	SNP	missense_variant	MODERATE	aCc/aTc	p.Thr452Ile/c.1355C>T	fucI	EFF=missense_variant(MODERATE|MISSENSE|aCc/aTc|p.Thr452Ile/c.1355C>T|591|fucI|protein_coding|CODING|ACT40305|1|1),upstream_gene_variant(MODIFIER||500||482|fucK|protein_coding|CODING|ACT40306||1),upstream_gene_variant(MODIFIER||4261||357|ECB_02650|protein_coding|CODING|ACT40302||1),upstream_gene_variant(MODIFIER||3327||327|ECB_02651|protein_coding|CODING|ACT40303||1),upstream_gene_variant(MODIFIER…	1	13	COG2407	G	NO	2830203	2831978	+	C1355T	-735.68	-735.68	2.78049e-20	2.84775e-20	270.93	269.77	0.5711	0	1304-1514	0.9996	0.9999	1273-1373	0.9961	0.999847	0.997809
2837254	T	TT	INS	upstream_gene_variant	MODIFIER	.	.	.	EFF=upstream_gene_variant(MODIFIER||701||401|csdA|protein_coding|CODING|ACT40313||1),upstream_gene_variant(MODIFIER||1906||147|ygdK|protein_coding|CODING|ACT40314||1),upstream_gene_variant(MODIFIER||1393||366|ygdE|protein_coding|CODING|ACT40309||1),upstream_gene_variant(MODIFIER||1005||131|ygdD|protein_coding|CODING|ACT40310||1),upstream_gene_variant(MODIFIER||4751|||metZ|tRNA|NON_CODING|ECB_t000…	.	.	NA	NA	.	.	.	.	.	.	.	.	.	.	.	.	.	.	.	.	.	.	.	.
2840600	G	A	SNP	upstream_gene_variant	MODIFIER	.	.	.	EFF=upstream_gene_variant(MODIFIER||4738||366|ygdE|protein_coding|CODING|ACT40309||1),upstream_gene_variant(MODIFIER||4350||131|ygdD|protein_coding|CODING|ACT40310||1),upstream_gene_variant(MODIFIER||1406|||metZ|tRNA|NON_CODING|ECB_t00051||1),upstream_gene_variant(MODIFIER||1516|||metW|tRNA|NON_CODING|ECB_t00052||1),upstream_gene_variant(MODIFIER||3414||305|gcvA|protein_coding|CODING|ACT40311||1)…	.	.	NA	NA	.	.	.	.	.	.	.	.	.	.	.	.	.	.	.	.	.	.	.	.
2841962	A	AA	INS	upstream_gene_variant	MODIFIER	.	.	.	EFF=upstream_gene_variant(MODIFIER||43|||metZ|tRNA|NON_CODING|ECB_t00051||1),upstream_gene_variant(MODIFIER||153|||metW|tRNA|NON_CODING|ECB_t00052||1),upstream_gene_variant(MODIFIER||4777||305|gcvA|protein_coding|CODING|ACT40311||1),upstream_gene_variant(MODIFIER||263|||metV|tRNA|NON_CODING|ECB_t00053||1),upstream_gene_variant(MODIFIER||4199||75|ygdI|protein_coding|CODING|ACT40312||1),upstream_ge…	.	.	NA	NA	.	.	.	.	.	.	.	.	.	.	.	.	.	.	.	.	.	.	.	.
2843545	T	C	SNP	missense_variant	MODERATE	Agc/Ggc	p.Ser29Gly/c.85A>G	amiC	EFF=missense_variant(MODERATE|MISSENSE|Agc/Ggc|p.Ser29Gly/c.85A>G|417|amiC|protein_coding|CODING|ACT40317|1|1),upstream_gene_variant(MODIFIER||316||443|argA|protein_coding|CODING|ACT40318||1|WARNING_TRANSCRIPT_NO_START_CODON),upstream_gene_variant(MODIFIER||3084||268|ygdL|protein_coding|CODING|ACT40315||1),upstream_gene_variant(MODIFIER||1748||365|mltA|protein_coding|CODING|ACT40316||1),downstrea…	90	34	COG0860	M	NO	2842376	2843629	-	A85G	-528.43	-528.43	2.22863e-14	2.2117e-14	229.05	230.45	0.5614	0.0108	55-113	0.8365	0.9816	58-110	0.8837	0.998867	0.970169
2845159	T	C	SNP	synonymous_variant	LOW	cgT/cgC	p.Arg433Arg/c.1299T>C	argA	EFF=synonymous_variant(LOW|SILENT|cgT/cgC|p.Arg433Arg/c.1299T>C|443|argA|protein_coding|CODING|ACT40318|1|1|WARNING_TRANSCRIPT_NO_START_CODON),upstream_gene_variant(MODIFIER||4698||268|ygdL|protein_coding|CODING|ACT40315||1),upstream_gene_variant(MODIFIER||3362||365|mltA|protein_coding|CODING|ACT40316||1),upstream_gene_variant(MODIFIER||1530||417|amiC|protein_coding|CODING|ACT40317||1),downstream…	14	187	COG0548	E	NO	2843861	2845192	+	T1299C	-560.36	-560.41	6.0002e-14	8.33377e-14	467.33	469.53	0.5085	0.3387	1191-1306	0.0228	0.0546	1208-1257	0.0566	0.923811	0.984174
2847052	A	G	SNP	missense_variant	MODERATE	gTt/gCt	p.Val10Ala/c.29T>C	recD	EFF=missense_variant(MODERATE|MISSENSE|gTt/gCt|p.Val10Ala/c.29T>C|608|recD|protein_coding|CODING|ACT40319|1|1),upstream_gene_variant(MODIFIER||3423||417|amiC|protein_coding|CODING|ACT40317||1),downstream_gene_variant(MODIFIER||28||1180|recB|protein_coding|CODING|ACT40320||1),downstream_gene_variant(MODIFIER||4970|||metZ|tRNA|NON_CODING|ECB_t00051||1),downstream_gene_variant(MODIFIER||4860|||metW|…	24	29	COG0507	L	NO	.	.	.	.	.	.	.	.	.	.	.	.	.	.	.	.	.	.	.
2849520	T	C	SNP	missense_variant	MODERATE	gAg/gGg	p.Glu368Gly/c.1103A>G	recB	EFF=missense_variant(MODERATE|MISSENSE|gAg/gGg|p.Glu368Gly/c.1103A>G|1180|recB|protein_coding|CODING|ACT40320|1|1),upstream_gene_variant(MODIFIER||2440||608|recD|protein_coding|CODING|ACT40319||1),downstream_gene_variant(MODIFIER||4328||443|argA|protein_coding|CODING|ACT40318||1|WARNING_TRANSCRIPT_NO_START_CODON),downstream_gene_variant(MODIFIER||1095||962|ptr|protein_coding|CODING|ACT40321||1),d…	43	39	COG1074	L	NO	2847080	2850622	-	A1103G	-1539.38	-1539.15	6.39825e-38	5.18125e-38	864.51	870.19	0.5561	0.0127	1101-1197	0.8016	0.9502	1199-1267	0.7901	0.988414	0.971379
2852530	T	C	SNP	missense_variant	MODERATE	gAc/gGc	p.Asp325Gly/c.974A>G	ptr	EFF=missense_variant(MODERATE|MISSENSE|gAc/gGc|p.Asp325Gly/c.974A>G|962|ptr|protein_coding|CODING|ACT40321|1|1),upstream_gene_variant(MODIFIER||1908||1180|recB|protein_coding|CODING|ACT40320||1),downstream_gene_variant(MODIFIER||1149||1122|recC|protein_coding|CODING|ACT40322||1),downstream_gene_variant(MODIFIER||4530||107|ppdC|protein_coding|CODING|ACT40323||1),downstream_gene_variant(MODIFIER||4…	22	32	COG1025	O	NO	2850615	2853503	-	A974G	-1174.29	-1174.45	1.81976e-29	5.06644e-30	678.32	812.81	0.4813	0.2532	941-990	0.0401	0.5386	937-986	0.2682	0.989638	0.971233
2854977	G	A	SNP	missense_variant	MODERATE	Cca/Tca	p.Pro691Ser/c.2071C>T	recC	EFF=missense_variant(MODERATE|MISSENSE|Cca/Tca|p.Pro691Ser/c.2071C>T|1122|recC|protein_coding|CODING|ACT40322|1|1),upstream_gene_variant(MODIFIER||4355||1180|recB|protein_coding|CODING|ACT40320||1),upstream_gene_variant(MODIFIER||1474||962|ptr|protein_coding|CODING|ACT40321||1),downstream_gene_variant(MODIFIER||2083||107|ppdC|protein_coding|CODING|ACT40323||1),downstream_gene_variant(MODIFIER||23…	44	28	COG1330	L	NO	2853679	2857047	-	C2071T	-1467.3	-1468.41	8.77394e-36	2.92131e-35	605.52	473.26	0.5362	0.0288	2062-2111	0.6447	0.86	2063-2112	0.6208	0.9832	0.971673
2864346	A	G	SNP	missense_variant	MODERATE	cAg/cGg	p.Gln22Arg/c.65A>G	mutH	EFF=missense_variant(MODERATE|MISSENSE|cAg/cGg|p.Gln22Arg/c.65A>G|229|mutH|protein_coding|CODING|ACT40331|1|1),upstream_gene_variant(MODIFIER||4571||264|thyA|protein_coding|CODING|ACT40327||1),upstream_gene_variant(MODIFIER||694||237|ygdQ|protein_coding|CODING|ACT40332||1),upstream_gene_variant(MODIFIER||3689||291|lgt|protein_coding|CODING|ACT40328||1),upstream_gene_variant(MODIFIER||1545||72|ygd…	32	39	COG3066	L	NO	2864282	2864971	+	A65G	-296.58	-296.88	1.45334e-06	1.60252e-06	65.85	65.81	0.5132	0	31-80	0.9986	0.9999	35-85	0.9927	0.999987	0.99997
2871837	T	C	SNP	synonymous_variant	LOW	ggT/ggC	p.Gly206Gly/c.618T>C	galR	EFF=synonymous_variant(LOW|SILENT|ggT/ggC|p.Gly206Gly/c.618T>C|343|galR|protein_coding|CODING|ACT40337|1|1),upstream_gene_variant(MODIFIER||3355||397|ygeD|protein_coding|CODING|ACT40335||1),upstream_gene_variant(MODIFIER||1805||311|lysR|protein_coding|CODING|ACT40339||1),upstream_gene_variant(MODIFIER||1203||719|aas|protein_coding|CODING|ACT40336||1),downstream_gene_variant(MODIFIER||4580||346|ta…	56	66	COG1609	K	NO	2871220	2872251	+	T618C	-421.72	-423.86	5.43923e-11	5.63892e-11	148.8	144.68	0.5012	0.0383	529-618	0.5729	0.8014	531-625	0.541	0.909463	0.914323
2877972	G	A	SNP	synonymous_variant	LOW	ggC/ggT	p.Gly258Gly/c.774C>T	kduI	EFF=synonymous_variant(LOW|SILENT|ggC/ggT|p.Gly258Gly/c.774C>T|278|kduI|protein_coding|CODING|ACT40343|1|1|WARNING_TRANSCRIPT_NO_START_CODON),upstream_gene_variant(MODIFIER||4452||420|lysA|protein_coding|CODING|ACT40338||1),upstream_gene_variant(MODIFIER||2716||230|ygeA|protein_coding|CODING|ACT40340||1),upstream_gene_variant(MODIFIER||2497||409|yqeG|protein_coding|CODING|ACT40345||1),upstream_ge…	4	47	COG3717	G	NO	2877909	2878745	-	A14G-C774T	-314.5	-314.5	1.30485e-09	8.04091e-10	198.18	196.57	0.497	0.2198	539-590	0.0488	-0.0856	754-824	0.0288	0.816835	0.883064
2878732	T	C	SNP	missense_variant	MODERATE	cAg/cGg	p.Gln5Arg/c.14A>G	kduI	EFF=missense_variant(MODERATE|MISSENSE|cAg/cGg|p.Gln5Arg/c.14A>G|278|kduI|protein_coding|CODING|ACT40343|1|1|WARNING_TRANSCRIPT_NO_START_CODON),upstream_gene_variant(MODIFIER||3476||230|ygeA|protein_coding|CODING|ACT40340||1),upstream_gene_variant(MODIFIER||1737||409|yqeG|protein_coding|CODING|ACT40345||1),upstream_gene_variant(MODIFIER||1929||472|araE|protein_coding|CODING|ACT40341||1),upstream_…	4	47	COG3717	G	NO	2877909	2878745	-	A14G-C774T	-314.5	-314.5	1.30485e-09	8.04091e-10	198.18	196.57	0.497	0.2198	539-590	0.0488	-0.0856	754-824	0.0288	0.816835	0.883064
2885435	G	GG	INS	frameshift_variant	HIGH	tcc/tCcc	p.Ser71_Pro72fs/c.211_212insC	ygeR	EFF=frameshift_variant(HIGH||tcc/tCcc|p.Ser71_Pro72fs/c.211_212insC|251|ygeR|protein_coding|CODING|ACT40350|1|1),upstream_gene_variant(MODIFIER||664||752|xdhA|protein_coding|CODING|ACT40351||1),upstream_gene_variant(MODIFIER||2933||292|xdhB|protein_coding|CODING|ACT40352||1),upstream_gene_variant(MODIFIER||3808||159|xdhC|protein_coding|CODING|ACT40353||1),upstream_gene_variant(MODIFIER||935||183|…	36	39	COG0739	M	NO	.	.	.	.	.	.	.	.	.	.	.	.	.	.	.	.	.	.	.
2892689	G	A	SNP	missense_variant	MODERATE	Gcc/Acc	p.Ala225Thr/c.673G>A	ygeW	EFF=missense_variant(MODERATE|MISSENSE|Gcc/Acc|p.Ala225Thr/c.673G>A|396|ygeW|protein_coding|CODING|ACT40355|1|1),upstream_gene_variant(MODIFIER||576||398|ygeX|protein_coding|CODING|ACT40356||1),upstream_gene_variant(MODIFIER||1830||403|ygeY|protein_coding|CODING|ACT40357||1),upstream_gene_variant(MODIFIER||3094||461|ygeZ|protein_coding|CODING|ACT40358||1),upstream_gene_variant(MODIFIER||1148||592…	0	32	COG0078	E	NO	2892017	2893207	+	G673A	-416.08	-416.48	3.43875e-11	3.44761e-11	209.5	209.46	0.5162	0.0047	663-743	0.909	0.9922	663-720	0.93	0.999839	0.998582
2894205	A	G	SNP	missense_variant	MODERATE	gAc/gGc	p.Asp314Gly/c.941A>G	ygeX	EFF=missense_variant(MODERATE|MISSENSE|gAc/gGc|p.Asp314Gly/c.941A>G|398|ygeX|protein_coding|CODING|ACT40356|1|1),upstream_gene_variant(MODIFIER||314||403|ygeY|protein_coding|CODING|ACT40357||1),upstream_gene_variant(MODIFIER||1578||461|ygeZ|protein_coding|CODING|ACT40358||1),upstream_gene_variant(MODIFIER||2664||592|ygeV|protein_coding|CODING|ACT40354||1),upstream_gene_variant(MODIFIER||3011||310…	0	10	COG1171	E	NO	2893265	2894461	+	A941G-C1035T	-476.31	-481.1	7.91991e-13	8.76259e-13	304.28	250.54	0.5558	0.1646	1027-1076	0.1507	-0.2889	1029-1087	0.0287	0.909437	0.86936
2894299	C	T	SNP	synonymous_variant	LOW	ggC/ggT	p.Gly345Gly/c.1035C>T	ygeX	EFF=synonymous_variant(LOW|SILENT|ggC/ggT|p.Gly345Gly/c.1035C>T|398|ygeX|protein_coding|CODING|ACT40356|1|1),upstream_gene_variant(MODIFIER||220||403|ygeY|protein_coding|CODING|ACT40357||1),upstream_gene_variant(MODIFIER||1484||461|ygeZ|protein_coding|CODING|ACT40358||1),upstream_gene_variant(MODIFIER||2758||592|ygeV|protein_coding|CODING|ACT40354||1),upstream_gene_variant(MODIFIER||2917||310|yqe…	0	10	COG1171	E	NO	2893265	2894461	+	A941G-C1035T	-476.31	-481.1	7.91991e-13	8.76259e-13	304.28	250.54	0.5558	0.1646	1027-1076	0.1507	-0.2889	1029-1087	0.0287	0.909437	0.86936
2895508	T	C	SNP	synonymous_variant	LOW	aaT/aaC	p.Asn330Asn/c.990T>C	ygeY	EFF=synonymous_variant(LOW|SILENT|aaT/aaC|p.Asn330Asn/c.990T>C|403|ygeY|protein_coding|CODING|ACT40357|1|1),upstream_gene_variant(MODIFIER||275||461|ygeZ|protein_coding|CODING|ACT40358||1),upstream_gene_variant(MODIFIER||3967||592|ygeV|protein_coding|CODING|ACT40354||1),upstream_gene_variant(MODIFIER||1708||310|yqeA|protein_coding|CODING|ACT40359||1),downstream_gene_variant(MODIFIER||2301||396|yg…	2	23	COG0624	E	NO	2894519	2895730	+	T990C-C1126T	-468.65	-465.43	4.67099e-12	2.95093e-12	183.7	210.21	0.5485	0.1561	1117-1178	0.1636	0.1772	1120-1169	0.1278	0.954159	0.919562
2895644	C	T	SNP	missense_variant	MODERATE	Cct/Tct	p.Pro376Ser/c.1126C>T	ygeY	EFF=missense_variant(MODERATE|MISSENSE|Cct/Tct|p.Pro376Ser/c.1126C>T|403|ygeY|protein_coding|CODING|ACT40357|1|1),upstream_gene_variant(MODIFIER||139||461|ygeZ|protein_coding|CODING|ACT40358||1),upstream_gene_variant(MODIFIER||4103||592|ygeV|protein_coding|CODING|ACT40354||1),upstream_gene_variant(MODIFIER||1572||310|yqeA|protein_coding|CODING|ACT40359||1),downstream_gene_variant(MODIFIER||2437||…	2	23	COG0624	E	NO	2894519	2895730	+	T990C-C1126T	-468.65	-465.43	4.67099e-12	2.95093e-12	183.7	210.21	0.5485	0.1561	1117-1178	0.1636	0.1772	1120-1169	0.1278	0.954159	0.919562
2899661	CC	C	DEL	frameshift_variant	HIGH	gcg/	p.Ala111fs/c.333delG	yqeB	EFF=frameshift_variant(HIGH||gcg/|p.Ala111fs/c.333delG|541|yqeB|protein_coding|CODING|ACT40360|1|1),upstream_gene_variant(MODIFIER||1253||192|ygfJ|protein_coding|CODING|ACT40362||1),upstream_gene_variant(MODIFIER||2152||1032|ygfK|protein_coding|CODING|ACT40363||1),downstream_gene_variant(MODIFIER||380||256|yqeC|protein_coding|CODING|ACT40361||1|WARNING_TRANSCRIPT_NO_START_CODON),downstream_gene_v…	2	38	COG1975	O	NO	.	.	.	.	.	.	.	.	.	.	.	.	.	.	.	.	.	.	.
2900727	CC	C	DEL	frameshift_variant	HIGH	ggg/	p.Gly29fs/c.85delG	yqeC	EFF=frameshift_variant(HIGH||ggg/|p.Gly29fs/c.85delG|256|yqeC|protein_coding|CODING|ACT40361|1|1|WARNING_TRANSCRIPT_NO_START_CODON),upstream_gene_variant(MODIFIER||187||192|ygfJ|protein_coding|CODING|ACT40362||1),upstream_gene_variant(MODIFIER||1086||1032|ygfK|protein_coding|CODING|ACT40363||1),upstream_gene_variant(MODIFIER||4187||442|ssnA|protein_coding|CODING|ACT40364||1),upstream_gene_variant…	2	35	COG0552	U	NO	.	.	.	.	.	.	.	.	.	.	.	.	.	.	.	.	.	.	.
2902748	G	A	SNP	missense_variant	MODERATE	gGc/gAc	p.Gly312Asp/c.935G>A	ygfK	EFF=missense_variant(MODERATE|MISSENSE|gGc/gAc|p.Gly312Asp/c.935G>A|1032|ygfK|protein_coding|CODING|ACT40363|1|1),upstream_gene_variant(MODIFIER||2167||442|ssnA|protein_coding|CODING|ACT40364||1),upstream_gene_variant(MODIFIER||2754||541|yqeB|protein_coding|CODING|ACT40360||1),upstream_gene_variant(MODIFIER||1936||256|yqeC|protein_coding|CODING|ACT40361||1|WARNING_TRANSCRIPT_NO_START_CODON),upstr…	0	19	COG0493	ER	NO	2901814	2904912	+	G935A	-1210.79	-1208.53	3.69255e-31	8.72729e-32	885.99	724.04	0.4988	0.2174	927-1026	0.0587	0.4835	927-1018	0.2339	0.972193	0.990523
2905544	G	A	SNP	synonymous_variant	LOW	ctG/ctA	p.Leu210Leu/c.630G>A	ssnA	EFF=synonymous_variant(LOW|SILENT|ctG/ctA|p.Leu210Leu/c.630G>A|442|ssnA|protein_coding|CODING|ACT40364|1|1),upstream_gene_variant(MODIFIER||4732||256|yqeC|protein_coding|CODING|ACT40361||1|WARNING_TRANSCRIPT_NO_START_CODON),upstream_gene_variant(MODIFIER||750||259|ygfM|protein_coding|CODING|ACT40365||1),upstream_gene_variant(MODIFIER||1526||956|xdhD|protein_coding|CODING|ACT40366||1),upstream_gen…	1	18	COG0402	FR	NO	2904915	2906243	+	G630A	-534.15	-533.29	1.29997e-15	2.8843e-15	309.86	324.36	0.5287	0.1833	595-644	0.126	0.0396	587-636	0.0875	0.954253	0.941463
2908406	G	A	SNP	missense_variant	MODERATE	gGt/gAt	p.Gly446Asp/c.1337G>A	xdhD	EFF=missense_variant(MODERATE|MISSENSE|gGt/gAt|p.Gly446Asp/c.1337G>A|956|xdhD|protein_coding|CODING|ACT40366|1|1),upstream_gene_variant(MODIFIER||1699||466|ygfO|protein_coding|CODING|ACT40367||1),upstream_gene_variant(MODIFIER||3114||439|guaD|protein_coding|CODING|ACT40368||1),upstream_gene_variant(MODIFIER||4469||455|ygfQ|protein_coding|CODING|ACT40369||1),downstream_gene_variant(MODIFIER||3494|…	3	25	COG2080	C	NO	2907070	2909940	+	G1337A	-1197.8	-1197.31	5.11621e-32	1.69166e-30	507.54	569.19	0.5511	0.0072	1184-1397	0.8723	0.9772	1205-1378	0.8676	0.999311	0.992225
2917064	A	G	SNP	upstream_gene_variant	MODIFIER	.	.	.	EFF=upstream_gene_variant(MODIFIER||57||482|ygfU|protein_coding|CODING|ACT40372||1),upstream_gene_variant(MODIFIER||1755||182|idi|protein_coding|CODING|ACT40373||1),upstream_gene_variant(MODIFIER||2454||110|ygfS|protein_coding|CODING|ACT40370||1|WARNING_TRANSCRIPT_NO_START_CODON),upstream_gene_variant(MODIFIER||379||639|ygfT|protein_coding|CODING|ACT40371||1),downstream_gene_variant(MODIFIER||422…	.	.	NA	NA	.	.	.	.	.	.	.	.	.	.	.	.	.	.	.	.	.	.	.	.
2917462	G	A	SNP	synonymous_variant	LOW	ccG/ccA	p.Pro114Pro/c.342G>A	ygfU	EFF=synonymous_variant(LOW|SILENT|ccG/ccA|p.Pro114Pro/c.342G>A|482|ygfU|protein_coding|CODING|ACT40372|1|1),upstream_gene_variant(MODIFIER||1357||182|idi|protein_coding|CODING|ACT40373||1),upstream_gene_variant(MODIFIER||2852||110|ygfS|protein_coding|CODING|ACT40370||1|WARNING_TRANSCRIPT_NO_START_CODON),upstream_gene_variant(MODIFIER||777||639|ygfT|protein_coding|CODING|ACT40371||1),downstream_ge…	0	19	COG2233	F	NO	2917121	2918569	+	G342A	-563.85	-561.55	2.34618e-14	5.72276e-15	271.63	329.01	0.5062	0.1651	333-393	0.1498	0.4157	342-393	0.2292	0.991731	0.965276
2934432	T	C	SNP	missense_variant	MODERATE	cAg/cGg	p.Gln121Arg/c.362A>G	gcvP	EFF=missense_variant(MODERATE|MISSENSE|cAg/cGg|p.Gln121Arg/c.362A>G|957|gcvP|protein_coding|CODING|ACT40387|1|1),upstream_gene_variant(MODIFIER||2778||247|ygfF|protein_coding|CODING|ACT40386||1),downstream_gene_variant(MODIFIER||480||129|gcvH|protein_coding|CODING|ACT40388||1),downstream_gene_variant(MODIFIER||893||364|gcvT|protein_coding|CODING|ACT40389||1),downstream_gene_variant(MODIFIER||3578…	5	32	COG0403	E	NO	2931920	2934793	-	A362G	-1240.88	-1242.93	4.85206e-33	4.25265e-33	562.92	552.52	0.5736	0.0862	315-364	0.3326	0.5403	316-365	0.3037	0.994917	0.989708
2936659	G	A	SNP	upstream_gene_variant	MODIFIER	.	.	.	EFF=upstream_gene_variant(MODIFIER||1866||957|gcvP|protein_coding|CODING|ACT40387||1),upstream_gene_variant(MODIFIER||1358||129|gcvH|protein_coding|CODING|ACT40388||1),upstream_gene_variant(MODIFIER||4704||109|ygfE|protein_coding|CODING|ACT40394||1),upstream_gene_variant(MODIFIER||240||364|gcvT|protein_coding|CODING|ACT40389||1),downstream_gene_variant(MODIFIER||207||400|visC|protein_coding|CODIN…	.	.	NA	NA	.	.	.	.	.	.	.	.	.	.	.	.	.	.	.	.	.	.	.	.
2947003	G	A	SNP	missense_variant	MODERATE	Gtg/Atg	p.Val135Met/c.403G>A	sbm	EFF=missense_variant(MODERATE|MISSENSE|Gtg/Atg|p.Val135Met/c.403G>A|714|sbm|protein_coding|CODING|ACT40400|1|1),upstream_gene_variant(MODIFIER||1735||331|argK|protein_coding|CODING|ACT40401||1),upstream_gene_variant(MODIFIER||2842||410|serA|protein_coding|CODING|ACT40396||1),upstream_gene_variant(MODIFIER||2741||261|ygfG|protein_coding|CODING|ACT40402||1),upstream_gene_variant(MODIFIER||1927||219…	1	30	COG1884	I	NO	2946601	2948745	+	G403A	-885.09	-882.37	1.25619e-23	1.06926e-23	341.28	339.67	0.5287	0.1984	354-406	0.1092	0.4648	354-403	0.2564	0.982517	0.989238
2952039	T	C	SNP	missense_variant	MODERATE	Acg/Gcg	p.Thr296Ala/c.886A>G	ygfI	EFF=missense_variant(MODERATE|MISSENSE|Acg/Gcg|p.Thr296Ala/c.886A>G|298|ygfI|protein_coding|CODING|ACT40404|1|1),downstream_gene_variant(MODIFIER||1052||246|yggE|protein_coding|CODING|ACT40405||1|WARNING_TRANSCRIPT_NO_START_CODON),downstream_gene_variant(MODIFIER||3294||714|sbm|protein_coding|CODING|ACT40400||1),downstream_gene_variant(MODIFIER||1885||211|yggA|protein_coding|CODING|ACT40406||1|WA…	7	32	COG0583	K	NO	2952028	2952924	-	C767T-A886G	-304.78	-306.99	3.44229e-11	1.25423e-10	216.12	172.7	0.4804	0.0973	567-616	0.2568	0.2943	577-635	0.1542	0.905799	0.772002
2952158	G	A	SNP	missense_variant	MODERATE	aCg/aTg	p.Thr256Met/c.767C>T	ygfI	EFF=missense_variant(MODERATE|MISSENSE|aCg/aTg|p.Thr256Met/c.767C>T|298|ygfI|protein_coding|CODING|ACT40404|1|1),downstream_gene_variant(MODIFIER||933||246|yggE|protein_coding|CODING|ACT40405||1|WARNING_TRANSCRIPT_NO_START_CODON),downstream_gene_variant(MODIFIER||3413||714|sbm|protein_coding|CODING|ACT40400||1),downstream_gene_variant(MODIFIER||1766||211|yggA|protein_coding|CODING|ACT40406||1|WAR…	7	32	COG0583	K	NO	2952028	2952924	-	C767T-A886G	-304.78	-306.99	3.44229e-11	1.25423e-10	216.12	172.7	0.4804	0.0973	567-616	0.2568	0.2943	577-635	0.1542	0.905799	0.772002
2960413	G	A	SNP	synonymous_variant	LOW	Ctg/Ttg	p.Leu10Leu/c.28C>T	yggC	EFF=synonymous_variant(LOW|SILENT|Ctg/Ttg|p.Leu10Leu/c.28C>T|237|yggC|protein_coding|CODING|ACT40411|1|1|WARNING_TRANSCRIPT_NO_START_CODON),upstream_gene_variant(MODIFIER||4855||286|yggB|protein_coding|CODING|ACT40407||1),upstream_gene_variant(MODIFIER||3418||359|fbaA|protein_coding|CODING|ACT40408||1),upstream_gene_variant(MODIFIER||2040||387|pgk|protein_coding|CODING|ACT40409||1),upstream_gene_…	42	68	COG1072	H	NO	2959727	2960440	-	C28T	-262.18	-259.53	4.42995e-09	4.18442e-09	154.18	161.35	0.5044	0.1448	116-225	0.1423	0.0739	116-165	0.0623	0.955072	0.92862
2964681	G	A	SNP	missense_variant	MODERATE	gCa/gTa	p.Ala134Val/c.401C>T	cmtB	EFF=missense_variant(MODERATE|MISSENSE|gCa/gTa|p.Ala134Val/c.401C>T|138|cmtB|protein_coding|CODING|ACT40416|1|1),upstream_gene_variant(MODIFIER||4241||237|yggC|protein_coding|CODING|ACT40411||1|WARNING_TRANSCRIPT_NO_START_CODON),upstream_gene_variant(MODIFIER||3735||169|yggD|protein_coding|CODING|ACT40412||1),upstream_gene_variant(MODIFIER||2748||321|yggF|protein_coding|CODING|ACT40413||1),upstre…	0	36	COG1762	GT	NO	2964665	2965081	-	C401T	-123.19	-121.44	1.63551e-05	5.42667e-06	81.07	91.57	0.4424	0.0765	356-406	0.2618	0.2522	356-406	0.0939	0.964521	0.958935
2979244	A	G	SNP	missense_variant	MODERATE	cAc/cGc	p.His186Arg/c.557A>G	yqgE	EFF=missense_variant(MODERATE|MISSENSE|cAc/cGc|p.His186Arg/c.557A>G|187|yqgE|protein_coding|CODING|ACT40430|1|1),upstream_gene_variant(MODIFIER||7||138|yqgF|protein_coding|CODING|ACT40431||1),upstream_gene_variant(MODIFIER||1605||234|yggS|protein_coding|CODING|ACT40433||1),upstream_gene_variant(MODIFIER||2327||188|yggT|protein_coding|CODING|ACT40434||1),upstream_gene_variant(MODIFIER||2890||96|yg…	152	126	COG1678	K	NO	2978688	2979251	+	A557G	-216.66	-216.14	2.29413e-07	2.30692e-07	73.53	73.54	0.5529	0	375-561	0.9997	1	375-561	0.9976	0.999999	0.999914
2988534	A	G	SNP	upstream_gene_variant	MODIFIER	.	.	.	EFF=upstream_gene_variant(MODIFIER||140||350|mutY|protein_coding|CODING|ACT40443||1),upstream_gene_variant(MODIFIER||1220||91|yggX|protein_coding|CODING|ACT40444||1),upstream_gene_variant(MODIFIER||1560||359|mltC|protein_coding|CODING|ACT40445||1),upstream_gene_variant(MODIFIER||3308||335|yggM|protein_coding|CODING|ACT40438||1|WARNING_TRANSCRIPT_NO_START_CODON),upstream_gene_variant(MODIFIER||284…	.	.	NA	NA	.	.	.	.	.	.	.	.	.	.	.	.	.	.	.	.	.	.	.	.
2996343	C	T	SNP	upstream_gene_variant	MODIFIER	.	.	.	EFF=upstream_gene_variant(MODIFIER||26||294|ECB_02797|protein_coding|CODING|ACT40449||1),upstream_gene_variant(MODIFIER||990||300|ECB_02798|protein_coding|CODING|ACT40450||1),upstream_gene_variant(MODIFIER||3221||948|flu|protein_coding|CODING|ACT40451||1),upstream_gene_variant(MODIFIER||1528||711|speC|protein_coding|CODING|ACT40447||1),downstream_gene_variant(MODIFIER||3712||418|nupG|protein_codi…	.	.	NA	NA	.	.	.	.	.	.	.	.	.	.	.	.	.	.	.	.	.	.	.	.
2997462	AA	A	DEL	frameshift_variant	HIGH	aac/	p.Asn44fs/c.131delA	ECB_02798	EFF=frameshift_variant(HIGH||aac/|p.Asn44fs/c.131delA|300|ECB_02798|protein_coding|CODING|ACT40450|1|1),upstream_gene_variant(MODIFIER||2101||948|flu|protein_coding|CODING|ACT40451||1),upstream_gene_variant(MODIFIER||2648||711|speC|protein_coding|CODING|ACT40447||1),downstream_gene_variant(MODIFIER||4832||418|nupG|protein_coding|CODING|ACT40446||1),downstream_gene_variant(MODIFIER||1548||235|yqgA…	NA	NA	NA	NA	NO	.	.	.	.	.	.	.	.	.	.	.	.	.	.	.	.	.	.	.
3000264	T	C	SNP	missense_variant	MODERATE	gTg/gCg	p.Val234Ala/c.701T>C	flu	EFF=missense_variant(MODERATE|MISSENSE|gTg/gCg|p.Val234Ala/c.701T>C|948|flu|protein_coding|CODING|ACT40451|1|1),upstream_gene_variant(MODIFIER||2267||838|yeeR|protein_coding|CODING|ACT40452||1),upstream_gene_variant(MODIFIER||4860||151|ECB_02802|protein_coding|CODING|ACT40453||1),downstream_gene_variant(MODIFIER||4349||235|yqgA|protein_coding|CODING|ACT40448||1|WARNING_TRANSCRIPT_NO_START_CODON),…	3	237	COG3468	MU	NO	.	.	.	.	.	.	.	.	.	.	.	.	.	.	.	.	.	.	.
3000987	T	C	SNP	missense_variant	MODERATE	aTt/aCt	p.Ile475Thr/c.1424T>C	flu	EFF=missense_variant(MODERATE|MISSENSE|aTt/aCt|p.Ile475Thr/c.1424T>C|948|flu|protein_coding|CODING|ACT40451|1|1),upstream_gene_variant(MODIFIER||1544||838|yeeR|protein_coding|CODING|ACT40452||1),upstream_gene_variant(MODIFIER||4137||151|ECB_02802|protein_coding|CODING|ACT40453||1),downstream_gene_variant(MODIFIER||4891|||pheV|tRNA|NON_CODING|ECB_t00055||1),downstream_gene_variant(MODIFIER||3734||…	3	237	COG3468	MU	NO	.	.	.	.	.	.	.	.	.	.	.	.	.	.	.	.	.	.	.
3001675	GG	G	DEL	frameshift_variant	HIGH	gta/	p.Val705fs/c.2113delG	flu	EFF=frameshift_variant(HIGH||gta/|p.Val705fs/c.2113delG|948|flu|protein_coding|CODING|ACT40451|1|1),upstream_gene_variant(MODIFIER||855||838|yeeR|protein_coding|CODING|ACT40452||1),upstream_gene_variant(MODIFIER||3448||151|ECB_02802|protein_coding|CODING|ACT40453||1),upstream_gene_variant(MODIFIER||4315||272|yafZ|protein_coding|CODING|ACT40454||1),downstream_gene_variant(MODIFIER||4423||294|ECB_0…	3	237	COG3468	MU	NO	.	.	.	.	.	.	.	.	.	.	.	.	.	.	.	.	.	.	.
3006462	G	GG	INS	frameshift_variant	HIGH	gtt/gGtt	p.Val158_Phe159fs/c.473_474insG	yafZ	EFF=frameshift_variant(HIGH||gtt/gGtt|p.Val158_Phe159fs/c.473_474insG|272|yafZ|protein_coding|CODING|ACT40454|1|1),upstream_gene_variant(MODIFIER||932||148|yeeS|protein_coding|CODING|ACT40456||1),upstream_gene_variant(MODIFIER||1441||73|yeeT|protein_coding|CODING|ACT40457||1),upstream_gene_variant(MODIFIER||1681||353|yeeU|protein_coding|CODING|ACT40458||1),upstream_gene_variant(MODIFIER||2832||12…	1	22	NA	NA	NO	.	.	.	.	.	.	.	.	.	.	.	.	.	.	.	.	.	.	.
3008391	A	G	SNP	missense_variant	MODERATE	gAc/gGc	p.Asp83Gly/c.248A>G	yeeU	EFF=missense_variant(MODERATE|MISSENSE|gAc/gGc|p.Asp83Gly/c.248A>G|353|yeeU|protein_coding|CODING|ACT40458|1|1),upstream_gene_variant(MODIFIER||904||124|yeeV|protein_coding|CODING|ACT40459||1),upstream_gene_variant(MODIFIER||1275||162|yeeW|protein_coding|CODING|ACT40460||1),upstream_gene_variant(MODIFIER||1775||65|ECB_02810|protein_coding|CODING|ACT40461||1),upstream_gene_variant(MODIFIER||2069||…	0	16	NA	NA	NO	.	.	.	.	.	.	.	.	.	.	.	.	.	.	.	.	.	.	.
3008394	G	A	SNP	missense_variant	MODERATE	gGa/gAa	p.Gly84Glu/c.251G>A	yeeU	EFF=missense_variant(MODERATE|MISSENSE|gGa/gAa|p.Gly84Glu/c.251G>A|353|yeeU|protein_coding|CODING|ACT40458|1|1),upstream_gene_variant(MODIFIER||901||124|yeeV|protein_coding|CODING|ACT40459||1),upstream_gene_variant(MODIFIER||1272||162|yeeW|protein_coding|CODING|ACT40460||1),upstream_gene_variant(MODIFIER||1772||65|ECB_02810|protein_coding|CODING|ACT40461||1),upstream_gene_variant(MODIFIER||2066||…	0	16	NA	NA	NO	.	.	.	.	.	.	.	.	.	.	.	.	.	.	.	.	.	.	.
3008431	G	GCCC	INS	inframe_insertion	MODERATE	gcc/CCCgcc	p.Ala97_Pro98insProAla/c.289_290insCCC	yeeU	EFF=inframe_insertion(MODERATE||gcc/CCCgcc|p.Ala97_Pro98insProAla/c.289_290insCCC|353|yeeU|protein_coding|CODING|ACT40458|1|1),upstream_gene_variant(MODIFIER||863||124|yeeV|protein_coding|CODING|ACT40459||1),upstream_gene_variant(MODIFIER||1234||162|yeeW|protein_coding|CODING|ACT40460||1),upstream_gene_variant(MODIFIER||1734||65|ECB_02810|protein_coding|CODING|ACT40461||1),upstream_gene_variant(M…	0	16	NA	NA	NO	.	.	.	.	.	.	.	.	.	.	.	.	.	.	.	.	.	.	.
3008432	G	C	SNP	missense_variant	MODERATE	Gcc/Ccc	p.Ala97Pro/c.289G>C	yeeU	EFF=missense_variant(MODERATE|MISSENSE|Gcc/Ccc|p.Ala97Pro/c.289G>C|353|yeeU|protein_coding|CODING|ACT40458|1|1),upstream_gene_variant(MODIFIER||863||124|yeeV|protein_coding|CODING|ACT40459||1),upstream_gene_variant(MODIFIER||1234||162|yeeW|protein_coding|CODING|ACT40460||1),upstream_gene_variant(MODIFIER||1734||65|ECB_02810|protein_coding|CODING|ACT40461||1),upstream_gene_variant(MODIFIER||2028||…	0	16	NA	NA	NO	.	.	.	.	.	.	.	.	.	.	.	.	.	.	.	.	.	.	.
3012005	T	A	SNP	upstream_gene_variant	MODIFIER	.	.	.	EFF=upstream_gene_variant(MODIFIER||129||51|ECB_02813|protein_coding|CODING|ACT40464||1),upstream_gene_variant(MODIFIER||312||339|ECB_02814|protein_coding|CODING|ACT40465||1|WARNING_TRANSCRIPT_NO_START_CODON),upstream_gene_variant(MODIFIER||4176||303|ECB_02804|protein_coding|CODING|ACT40455||1),upstream_gene_variant(MODIFIER||1415||378|ECB_02815|protein_coding|CODING|ACT40466||1|WARNING_TRANSCRIP…	.	.	NA	NA	.	.	.	.	.	.	.	.	.	.	.	.	.	.	.	.	.	.	.	.
3012482	C	T	SNP	stop_gained	HIGH	Cag/Tag	p.Gln56*/c.166C>T	ECB_02814	EFF=stop_gained(HIGH|NONSENSE|Cag/Tag|p.Gln56*/c.166C>T|339|ECB_02814|protein_coding|CODING|ACT40465|1|1|WARNING_TRANSCRIPT_NO_START_CODON),upstream_gene_variant(MODIFIER||4653||303|ECB_02804|protein_coding|CODING|ACT40455||1),upstream_gene_variant(MODIFIER||938||378|ECB_02815|protein_coding|CODING|ACT40466||1|WARNING_TRANSCRIPT_NO_START_CODON),upstream_gene_variant(MODIFIER||2098||558|ECB_02816|…	NA	NA	NA	NA	NO	3012317	3013336	+	C166T	-379.05	-380.81	6.39475e-11	1.12843e-10	127.01	160.59	0.4508	0.0427	76-166	0.5044	0.8907	76-166	0.6623	0.939512	0.821658
3014964	G	A	SNP	missense_variant	MODERATE	Gtg/Atg	p.Val129Met/c.385G>A	ECB_02816	EFF=missense_variant(MODERATE|MISSENSE|Gtg/Atg|p.Val129Met/c.385G>A|558|ECB_02816|protein_coding|CODING|ACT40467|1|1),upstream_gene_variant(MODIFIER||1302||246|ECB_02817|protein_coding|CODING|ACT40468||1),upstream_gene_variant(MODIFIER||3404||97|ECB_02812|protein_coding|CODING|ACT40463||1),upstream_gene_variant(MODIFIER||2039||675|ECB_02818|protein_coding|CODING|ACT40469||1),upstream_gene_variant…	NA	NA	NA	NA	NO	3014580	3016256	+	G385A	-689	-688.96	1.99579e-16	6.59351e-17	416.38	350.94	0.4863	0.0741	350-399	0.3134	0.8886	349-399	0.6412	0.966521	0.910767
3021895	TT	T	DEL	frameshift_variant	HIGH	aga/	p.Arg263fs/c.789delA	ECB_02821	EFF=frameshift_variant(HIGH||aga/|p.Arg263fs/c.789delA|379|ECB_02821|protein_coding|CODING|ACT40472|1|1),upstream_gene_variant(MODIFIER||413||310|ECB_02820|protein_coding|CODING|ACT40471||1),downstream_gene_variant(MODIFIER||4890||246|ECB_02817|protein_coding|CODING|ACT40468||1),downstream_gene_variant(MODIFIER||1362||154|ECB_02822|protein_coding|CODING|ACT40473||1),downstream_gene_variant(MODIFI…	NA	NA	NA	NA	NO	.	.	.	.	.	.	.	.	.	.	.	.	.	.	.	.	.	.	.
3027096	T	C	SNP	missense_variant	MODERATE	aAt/aGt	p.Asn192Ser/c.575A>G	ECB_02827	EFF=missense_variant(MODERATE|MISSENSE|aAt/aGt|p.Asn192Ser/c.575A>G|219|ECB_02827|protein_coding|CODING|ACT40478|1|1),upstream_gene_variant(MODIFIER||4412||379|ECB_02821|protein_coding|CODING|ACT40472||1),upstream_gene_variant(MODIFIER||3374||154|ECB_02822|protein_coding|CODING|ACT40473||1),upstream_gene_variant(MODIFIER||2633||167|insB-22|protein_coding|CODING|ACT40474||1),upstream_gene_variant(…	NA	NA	NA	NA	NO	3027011	3027670	-	A575G	-212.52	-213.79	1.3388e-07	1.48446e-07	154.99	178.46	0.3497	0.002	434-589	0.9377	0.9877	509-559	0.8988	0.982504	0.973514
3033139	G	A	SNP	missense_variant	MODERATE	gCg/gTg	p.Ala15Val/c.44C>T	ECB_02833	EFF=missense_variant(MODERATE|MISSENSE|gCg/gTg|p.Ala15Val/c.44C>T|123|ECB_02833|protein_coding|CODING|ACT40483|1|1),upstream_gene_variant(MODIFIER||4678||258|ECB_02828|protein_coding|CODING|ACT40479||1),upstream_gene_variant(MODIFIER||3081||178|yghD|protein_coding|CODING|ACT40480||1),upstream_gene_variant(MODIFIER||969||311|ECB_02831|protein_coding|CODING|ACT40481||1|WARNING_TRANSCRIPT_NO_START_C…	NA	NA	NA	NA	NO	3032811	3033182	-	C44T	-183.66	-182.7	0.000492347	3.03234e-05	87.02	48.23	0.6025	0.2356	38-88	0.0913	-0.0544	1968-05-01	0.0552	0.933995	0.720959
3034721	G	A	SNP	stop_gained	HIGH	Caa/Taa	p.Gln241*/c.721C>T	ECB_02836	EFF=stop_gained(HIGH|NONSENSE|Caa/Taa|p.Gln241*/c.721C>T|407|ECB_02836|protein_coding|CODING|ACT40486|1|1),upstream_gene_variant(MODIFIER||4663||178|yghD|protein_coding|CODING|ACT40480||1),upstream_gene_variant(MODIFIER||2551||311|ECB_02831|protein_coding|CODING|ACT40481||1|WARNING_TRANSCRIPT_NO_START_CODON),upstream_gene_variant(MODIFIER||1949||187|ECB_02832|protein_coding|CODING|ACT40482||1|WAR…	NA	NA	NA	NA	NO	.	.	.	.	.	.	.	.	.	.	.	.	.	.	.	.	.	.	.
3035291	C	CC	INS	frameshift_variant	HIGH	gca/gcaG	p.Ala50_Gly51fs/c.150_151insG	ECB_02836	EFF=frameshift_variant(HIGH||gca/gcaG|p.Ala50_Gly51fs/c.150_151insG|407|ECB_02836|protein_coding|CODING|ACT40486|1|1),upstream_gene_variant(MODIFIER||3122||311|ECB_02831|protein_coding|CODING|ACT40481||1|WARNING_TRANSCRIPT_NO_START_CODON),upstream_gene_variant(MODIFIER||2520||187|ECB_02832|protein_coding|CODING|ACT40482||1|WARNING_TRANSCRIPT_NO_START_CODON),upstream_gene_variant(MODIFIER||2110||1…	NA	NA	NA	NA	NO	.	.	.	.	.	.	.	.	.	.	.	.	.	.	.	.	.	.	.
3038156	C	T	SNP	missense_variant	MODERATE	cGc/cAc	p.Arg280His/c.839G>A	ECB_02838	EFF=missense_variant(MODERATE|MISSENSE|cGc/cAc|p.Arg280His/c.839G>A|686|ECB_02838|protein_coding|CODING|ACT40488|1|1|WARNING_TRANSCRIPT_NO_START_CODON),upstream_gene_variant(MODIFIER||4974||123|ECB_02833|protein_coding|CODING|ACT40483||1),upstream_gene_variant(MODIFIER||4414||187|ECB_02834|protein_coding|CODING|ACT40484||1|WARNING_TRANSCRIPT_NO_START_CODON),upstream_gene_variant(MODIFIER||3955||1…	NA	NA	NA	NA	NO	3036934	3038994	-	G839A	-882.34	-882.03	1.87747e-20	1.08857e-20	670.57	381.81	0.581	0.0378	800-849	0.5759	0.8626	781-839	0.6246	0.992911	0.935329
3040066	T	C	SNP	missense_variant	MODERATE	Aca/Gca	p.Thr116Ala/c.346A>G	yghG	EFF=missense_variant(MODERATE|MISSENSE|Aca/Gca|p.Thr116Ala/c.346A>G|136|yghG|protein_coding|CODING|ACT40490|1|1),upstream_gene_variant(MODIFIER||4625||407|ECB_02836|protein_coding|CODING|ACT40486||1),upstream_gene_variant(MODIFIER||3132||497|ECB_02837|protein_coding|CODING|ACT40487||1),upstream_gene_variant(MODIFIER||1072||686|ECB_02838|protein_coding|CODING|ACT40488||1|WARNING_TRANSCRIPT_NO_STAR…	269	36	NA	NA	NO	3040001	3040411	-	A346G	-129.31	-129.31	8.62556e-05	3.57737e-05	68.13	73.56	0.4549	0.0642	298-347	0.3849	0.6377	298-347	0.3559	0.973755	0.968351
3041502	T	C	SNP	missense_variant	MODERATE	cAg/cGg	p.Gln1501Arg/c.4502A>G	yghJ	EFF=missense_variant(MODERATE|MISSENSE|cAg/cGg|p.Gln1501Arg/c.4502A>G|1517|yghJ|protein_coding|CODING|ACT40492|1|1),upstream_gene_variant(MODIFIER||4568||497|ECB_02837|protein_coding|CODING|ACT40487||1),upstream_gene_variant(MODIFIER||2508||686|ECB_02838|protein_coding|CODING|ACT40488||1|WARNING_TRANSCRIPT_NO_START_CODON),upstream_gene_variant(MODIFIER||1648||276|yghF|protein_coding|CODING|ACT404…	221	28	NA	NA	NO	3041450	3046003	-	A4502G	-1910.69	-1909.89	2.36748e-43	2.23154e-43	694.6	695.72	0.5731	0.1483	4485-4543	0.1844	0.6404	4487-4541	0.3655	1	0.999994
3048262	A	G	SNP	upstream_gene_variant	MODIFIER	.	.	.	EFF=upstream_gene_variant(MODIFIER||2259||1517|yghJ|protein_coding|CODING|ACT40492||1),upstream_gene_variant(MODIFIER||91||560|yghK|protein_coding|CODING|ACT40493||1),downstream_gene_variant(MODIFIER||264||723|glcB|protein_coding|CODING|ACT40494||1),downstream_gene_variant(MODIFIER||2457||134|glcG|protein_coding|CODING|ACT40495||1),downstream_gene_variant(MODIFIER||2866||407|glcF|protein_coding|C…	.	.	NA	NA	.	.	.	.	.	.	.	.	.	.	.	.	.	.	.	.	.	.	.	.
3049944	C	T	SNP	missense_variant	MODERATE	Gat/Aat	p.Asp252Asn/c.754G>A	glcB	EFF=missense_variant(MODERATE|MISSENSE|Gat/Aat|p.Asp252Asn/c.754G>A|723|glcB|protein_coding|CODING|ACT40494|1|1),upstream_gene_variant(MODIFIER||3941||1517|yghJ|protein_coding|CODING|ACT40492||1),upstream_gene_variant(MODIFIER||1773||560|yghK|protein_coding|CODING|ACT40493||1),downstream_gene_variant(MODIFIER||775||134|glcG|protein_coding|CODING|ACT40495||1),downstream_gene_variant(MODIFIER||1184…	10	168	COG2225	C	NO	3048526	3050697	-	G754A	-897.32	-897.56	1.2547e-24	1.34838e-24	521.6	518.33	0.4988	0.0033	719-768	0.9152	0.9899	725-774	0.9115	0.999966	0.998914
3054827	G	A	SNP	synonymous_variant	LOW	gtC/gtT	p.Val29Val/c.87C>T	glcD	EFF=synonymous_variant(LOW|SILENT|gtC/gtT|p.Val29Val/c.87C>T|499|glcD|protein_coding|CODING|ACT40498|1|1),upstream_gene_variant(MODIFIER||337||254|glcC|protein_coding|CODING|ACT40499||1),upstream_gene_variant(MODIFIER||4130||723|glcB|protein_coding|CODING|ACT40494||1),upstream_gene_variant(MODIFIER||3704||134|glcG|protein_coding|CODING|ACT40495||1),upstream_gene_variant(MODIFIER||2476||407|glcF|p…	0	45	COG0277	C	NO	3053414	3054913	-	C87T	-669.03	-670.48	1.13189e-15	1.40222e-15	306.53	349.74	0.5645	0.0152	173-222	0.7794	0.9258	165-222	0.7326	0.969552	0.910375
3067578	T	C	SNP	missense_variant	MODERATE	cAg/cGg	p.Gln156Arg/c.467A>G	yghS	EFF=missense_variant(MODERATE|MISSENSE|cAg/cGg|p.Gln156Arg/c.467A>G|237|yghS|protein_coding|CODING|ACT40511|1|1|WARNING_TRANSCRIPT_NO_START_CODON),upstream_gene_variant(MODIFIER||4845||386|ECB_02855|protein_coding|CODING|ACT40505||1|WARNING_TRANSCRIPT_NO_START_CODON),upstream_gene_variant(MODIFIER||640||230|yghT|protein_coding|CODING|ACT40512||1),upstream_gene_variant(MODIFIER||3859||356|ECB_0285…	4	23	COG0125	F	NO	3067331	3068044	-	A467G	-252.55	-256.51	5.31043e-09	1.41688e-08	178.9	105.05	0.5112	0.0883	456-641	0.3252	0.6474	456-628	0.3844	0.935962	0.915734
3069224	T	C	SNP	missense_variant	MODERATE	aAg/aGg	p.Lys412Arg/c.1235A>G	pitB	EFF=missense_variant(MODERATE|MISSENSE|aAg/aGg|p.Lys412Arg/c.1235A>G|499|pitB|protein_coding|CODING|ACT40513|1|1),upstream_gene_variant(MODIFIER||4914||186|ECB_02857|protein_coding|CODING|ACT40507||1),upstream_gene_variant(MODIFIER||4078||274|ECB_02858|protein_coding|CODING|ACT40508||1),upstream_gene_variant(MODIFIER||2729||449|yghQ|protein_coding|CODING|ACT40509||1),upstream_gene_variant(MODIFIE…	1	18	COG0306	P	NO	3068959	3070458	-	A1235G	-640.76	-640.67	3.09437e-16	3.07689e-16	220.73	220.77	0.5536	0	1202-1251	0.9998	1	1207-1257	0.9988	1	0.999991
3071345	T	C	SNP	missense_variant	MODERATE	gAt/gGt	p.Asp422Gly/c.1265A>G	gss	EFF=missense_variant(MODERATE|MISSENSE|gAt/gGt|p.Asp422Gly/c.1265A>G|619|gss|protein_coding|CODING|ACT40514|1|1),upstream_gene_variant(MODIFIER||4850||449|yghQ|protein_coding|CODING|ACT40509||1),upstream_gene_variant(MODIFIER||4046||252|yghR|protein_coding|CODING|ACT40510||1),upstream_gene_variant(MODIFIER||1469||288|yghU|protein_coding|CODING|ACT40515||1),upstream_gene_variant(MODIFIER||3301||23…	52	62	COG0754	E	NO	3070750	3072609	-	A1265G	-760.42	-760.76	8.79566e-20	5.60295e-21	505.97	234.62	0.5486	0.1139	1071-1130	0.2491	0.6815	1069-1131	0.4143	0.761577	0.771793
3079219	T	C	SNP	synonymous_variant	LOW	agA/agG	p.Arg3Arg/c.9A>G	hybA	EFF=synonymous_variant(LOW|SILENT|agA/agG|p.Arg3Arg/c.9A>G|328|hybA|protein_coding|CODING|ACT40522|1|1|WARNING_TRANSCRIPT_NO_START_CODON),upstream_gene_variant(MODIFIER||4814||113|hybF|protein_coding|CODING|ACT40517||1),upstream_gene_variant(MODIFIER||4333||162|hybE|protein_coding|CODING|ACT40518||1),upstream_gene_variant(MODIFIER||3846||164|hybD|protein_coding|CODING|ACT40519||1),upstream_gene_v…	7	20	COG0437	C	NO	3078241	3079227	-	A9G	-407.88	-409.9	1.15274e-11	1.86611e-11	244.04	192.79	0.5694	0.0753	8-208	0.2728	0.6859	8-107	0.3127	0.952562	0.932937
3079250	C	T	SNP	upstream_gene_variant	MODIFIER	.	.	.	EFF=upstream_gene_variant(MODIFIER||4845||113|hybF|protein_coding|CODING|ACT40517||1),upstream_gene_variant(MODIFIER||4364||162|hybE|protein_coding|CODING|ACT40518||1),upstream_gene_variant(MODIFIER||3877||164|hybD|protein_coding|CODING|ACT40519||1),upstream_gene_variant(MODIFIER||2819||346|yghZ|protein_coding|CODING|ACT40525||1),upstream_gene_variant(MODIFIER||2174||567|hybC|protein_coding|CODIN…	.	.	NA	NA	.	.	.	.	.	.	.	.	.	.	.	.	.	.	.	.	.	.	.	.
3080023	T	C	SNP	upstream_gene_variant	MODIFIER	.	.	.	EFF=upstream_gene_variant(MODIFIER||4650||164|hybD|protein_coding|CODING|ACT40519||1),upstream_gene_variant(MODIFIER||2046||346|yghZ|protein_coding|CODING|ACT40525||1),upstream_gene_variant(MODIFIER||2947||567|hybC|protein_coding|CODING|ACT40520||1),upstream_gene_variant(MODIFIER||1772||392|hybB|protein_coding|CODING|ACT40521||1),upstream_gene_variant(MODIFIER||3811||294|yghA|protein_coding|CODIN…	.	.	NA	NA	.	.	.	.	.	.	.	.	.	.	.	.	.	.	.	.	.	.	.	.
3082285	G	A	SNP	missense_variant	MODERATE	Gca/Aca	p.Ala73Thr/c.217G>A	yghZ	EFF=missense_variant(MODERATE|MISSENSE|Gca/Aca|p.Ala73Thr/c.217G>A|346|yghZ|protein_coding|CODING|ACT40525|1|1),upstream_gene_variant(MODIFIER||4034||392|hybB|protein_coding|CODING|ACT40521||1),upstream_gene_variant(MODIFIER||1549||294|yghA|protein_coding|CODING|ACT40527||1),upstream_gene_variant(MODIFIER||3058||328|hybA|protein_coding|CODING|ACT40522||1|WARNING_TRANSCRIPT_NO_START_CODON),upstrea…	4	68	COG0667	C	NO	3082069	3083109	+	G217A	-417.43	-417.08	3.95179e-13	4.96495e-13	302.64	307.43	0.5287	0.0162	30-82	0.7623	0.8768	31-82	0.6469	0.980626	0.969431
3088378	AA	A	DEL	frameshift_variant	HIGH	aaa/	p.Lys215fs/c.645delA	yghB	EFF=frameshift_variant(HIGH||aaa/|p.Lys215fs/c.645delA|219|yghB|protein_coding|CODING|ACT40531|1|1),upstream_gene_variant(MODIFIER||4736||164|yqhA|protein_coding|CODING|ACT40526||1),upstream_gene_variant(MODIFIER||1148||387|yqhD|protein_coding|CODING|ACT40533||1),upstream_gene_variant(MODIFIER||2964||141|exbD|protein_coding|CODING|ACT40528||1),upstream_gene_variant(MODIFIER||2416||275|dkgA|protei…	45	57	COG0586	S	NO	.	.	.	.	.	.	.	.	.	.	.	.	.	.	.	.	.	.	.
3099686	G	A	SNP	missense_variant	MODERATE	Ccg/Tcg	p.Pro154Ser/c.460C>T	parC	EFF=missense_variant(MODERATE|MISSENSE|Ccg/Tcg|p.Pro154Ser/c.460C>T|752|parC|protein_coding|CODING|ACT40540|1|1),upstream_gene_variant(MODIFIER||4368||739|ygiQ|protein_coding|CODING|ACT40537||1),upstream_gene_variant(MODIFIER||2845||470|sufI|protein_coding|CODING|ACT40538||1),upstream_gene_variant(MODIFIER||2033||245|plsC|protein_coding|CODING|ACT40539||1),upstream_gene_variant(MODIFIER||4314||21…	173	58	COG0188	L	YES	3097887	3100145	-	C460T	-1001.76	-998.88	1.03603e-22	2.14747e-23	464.05	458.08	0.5761	0.0933	390-625	0.3085	0.5588	456-598	0.3164	0.992075	0.976458
3106990	G	A	SNP	missense_variant	MODERATE	Gat/Aat	p.Asp97Asn/c.289G>A	mdaB	EFF=missense_variant(MODERATE|MISSENSE|Gat/Aat|p.Asp97Asn/c.289G>A|193|mdaB|protein_coding|CODING|ACT40549|1|1),upstream_gene_variant(MODIFIER||324||104|ygiN|protein_coding|CODING|ACT40550||1),upstream_gene_variant(MODIFIER||4572||131|ygiT|protein_coding|CODING|ACT40542||1),upstream_gene_variant(MODIFIER||4274||98|ygiU|protein_coding|CODING|ACT40543||1),upstream_gene_variant(MODIFIER||3587||160|y…	77	83	COG2249	R	NO	3106702	3107283	+	G289A	-220.91	-220.91	1.0445e-06	1.02265e-06	104.46	103.48	0.5237	0.0009	201-442	0.9756	0.9974	210-289	0.9639	0.999373	0.98976
3112834	A	G	SNP	missense_variant	MODERATE	tAc/tGc	p.Tyr183Cys/c.548A>G	tolC	EFF=missense_variant(MODERATE|MISSENSE|tAc/tGc|p.Tyr183Cys/c.548A>G|493|tolC|protein_coding|CODING|ACT40556|1|1),upstream_gene_variant(MODIFIER||934||86|ygiA|protein_coding|CODING|ACT40557||1),upstream_gene_variant(MODIFIER||1178||191|ygiB|protein_coding|CODING|ACT40558||1),upstream_gene_variant(MODIFIER||3266||630|parE|protein_coding|CODING|ACT40551||1),upstream_gene_variant(MODIFIER||1759||386|…	532	353	COG1538	MU	NO	3112287	3113768	+	A548G	-556.26	-555.44	2.42357e-14	2.43859e-14	454.07	454.25	0.5137	0	528-577	0.9999	1	349-704	0.9994	0.999996	0.999883
3114766	G	A	SNP	missense_variant	MODERATE	atG/atA	p.Met58Ile/c.174G>A	ygiC	EFF=missense_variant(MODERATE|MISSENSE|atG/atA|p.Met58Ile/c.174G>A|386|ygiC|protein_coding|CODING|ACT40559|1|1),upstream_gene_variant(MODIFIER||4588||193|yqiA|protein_coding|CODING|ACT40552||1),upstream_gene_variant(MODIFIER||3761||275|cpdA|protein_coding|CODING|ACT40553||1),upstream_gene_variant(MODIFIER||3314||140|yqiB|protein_coding|CODING|ACT40554||1),upstream_gene_variant(MODIFIER||1956||257…	199	256	COG0754	E	NO	3114593	3115753	+	G174A	-485.51	-487.36	3.21507e-09	1.01982e-08	123.3	96.76	0.5134	0.3476	157-321	0.0226	-0.2685	211-286	0.0245	0.991897	0.896126
3117242	C	T	SNP	missense_variant	MODERATE	gCg/gTg	p.Ala174Val/c.521C>T	ygiE	EFF=missense_variant(MODERATE|MISSENSE|gCg/gTg|p.Ala174Val/c.521C>T|257|ygiE|protein_coding|CODING|ACT40561|1|1),upstream_gene_variant(MODIFIER||1770||96|yqiC|protein_coding|CODING|ACT40563||1),upstream_gene_variant(MODIFIER||2344||183|ygiL|protein_coding|CODING|ACT40564||1),upstream_gene_variant(MODIFIER||2991||822|yqiG|protein_coding|CODING|ACT40565||1),upstream_gene_variant(MODIFIER||636||271|…	61	92	COG0428	P	NO	3116722	3117495	+	C521T	-331.27	-331.76	1.51369e-07	2.51279e-07	259.08	182.1	0.5536	0.0106	502-712	0.8268	0.9703	576-685	0.8454	0.912309	0.842607
3124652	T	C	SNP	missense_variant	MODERATE	Aga/Gga	p.Arg42Gly/c.124A>G	glgS	EFF=missense_variant(MODERATE|MISSENSE|Aga/Gga|p.Arg42Gly/c.124A>G|66|glgS|protein_coding|CODING|ACT40568|1|1),upstream_gene_variant(MODIFIER||392||209|yqiJ|protein_coding|CODING|ACT40569||1),upstream_gene_variant(MODIFIER||1048||553|yqiK|protein_coding|CODING|ACT40570||1),downstream_gene_variant(MODIFIER||4515||183|ygiL|protein_coding|CODING|ACT40564||1),downstream_gene_variant(MODIFIER||1951||8…	39	259	NA	NA	NO	3124575	3124775	-	A124G	-62.04	-63.75	0.00377831	0.000740147	49.11	47.47	0.4527	0.1511	80-132	0.1445	0.2276	84-135	0.1352	0.84098	0.60485
3127955	C	T	SNP	upstream_gene_variant	MODIFIER	.	.	.	EFF=upstream_gene_variant(MODIFIER||3180||66|glgS|protein_coding|CODING|ACT40568||1),downstream_gene_variant(MODIFIER||199||477|rfaE|protein_coding|CODING|ACT40571||1),downstream_gene_variant(MODIFIER||4489||249|yqiH|protein_coding|CODING|ACT40566||1),downstream_gene_variant(MODIFIER||3423||354|yqiI|protein_coding|CODING|ACT40567||1),downstream_gene_variant(MODIFIER||1680||946|glnE|protein_coding…	.	.	NA	NA	.	.	.	.	.	.	.	.	.	.	.	.	.	.	.	.	.	.	.	.
[truncated: 247 more rows]
