# Supplementary material for: RNA chaperones buffer deleterious mutations in E. coli
Source: eLife. 2015 Mar 25;4:e04745. doi: 10.7554/eLife.04745 (PMC4402597; doi:10.7554/eLife.04745)
Supplement: Supplementary file 2. — Mutations in the 40k strain. DOI: http://dx.doi.org/10.7554/eLife.04745.017 [file elife04745s002.xlsx]

## Sheet: 40k.eff_annot4_w_header.txt
Supplementary file 2 - Mutations in the 40k strain compared to the reference REL606 genome
Variant_location: in relation to the REL606 reference genome (NC_012967.1)
Variant_type: SNP (Single nucleotide polymorphism), INS (insertion), DEL (deletion) [Insertion sequence variants are listed separately at the bottom of the table]
Variant_effect: as annotated by SnpEff v4.0 (http://snpeff.sourceforge.net/)
Predicted_impact: as categorized by SnpEff v4.0
Context: old codon context/new context for variants in coding sequence.
AA_change: The amino acid/nucleotide change and position within the protein/coding sequence
Gene: for variants in coding sequence, the gene affected
SNP_effect_string: full SnpEff-generated effect annotation. See SnpEff documentation
Expression_LB: Upper-quartile-normalized expression level of the gene in LB medium as computed by the Rockhopper software (http://cs.wellesley.edu/~btjaden/Rockhopper/index.html) across 3 biological replicates [NCBI Sequence Read Archive IDs: SRR794833, SRR794834, SRR794834]
Expression_Minimal: Upper-quartile-normalized expression level of the gene in minimal MOPS medium as computed by the Rockhopper software (http://cs.wellesley.edu/~btjaden/Rockhopper/index.html) across 3 biological replicates [NCBI Sequence Read Archive IDs: SRR794863, SRR794864, SRR794865]
COG(_class): the Cluster of Orthologous Group affiliation for proteins
Essential: Is the gene essential? (according to list compiled from multiple primary publications, available at http://ecoliwiki.net/colipedia/index.php/Essential_genes)
SNPs_in_gene: Summary of all variants present in the focal gene
MFE_reference(alt): Minimum free energies of WT (SNP-affected) RNA secondary structures as computed by RNAfold
MFE_freq_reference(alt): The frequency of the MFE structure in the ensembl of structures
Ensemble_diversity_reference(alt): The ensemble diversity computed by RNAfold
Dmax: Maximum local structural dissimilarity (WT versus SNP-affected structure) computed by RNAsnp
Dmax_interval: the RNA region where Dmax is found
Dmax_pval: Estimated significance of structural effect based on comparison to background distribution. See RNAsnp documentation for details
Rmin: Minimum local structural correlation (WT versus SNP-affected structure) computed by RNAsnp
Rmin_interval: the RNA region where Rmin is found
Rmin_pval: Estimated significance of structural effect based on comparison to background distribution. See RNAsnp documentation for details
Base_pairing_probability: Correlation of base pairing probabilities computed by SNPfold (http://ribosnitch.bio.unc.edu/snpfold/SNPfold.html)
Shannon_corr: Shannon correlation computed by SNPfold (http://ribosnitch.bio.unc.edu/snpfold/SNPfold.html)
RNA secondary structure and mutational effects were predicted based on coding regions of the respective genes. While mutations are listed individually, RNA secondary structures were determined using all mutations present in the relevant coding sequence.
Variant_location	Reference_allele	Variant_allele	Variant_type	Variant_effect	Predicted_impact	Context	AA_change	Gene	SNP_effect_string	Expression_LB	Expression_Minimal	COG	COG_class	Essential	Gene_start	Gene_end	Strand	SNPs_in_gene	MFE_reference	MFE_alt	MFE_freq_reference	MFE_freq_alt	Ensemble_diversity_reference	Ensemble_diversity_alt	CDS_GC_content	Dmax	Dmax_interval	Dmax_pval	Rmin	Rmin_interval	Rmin_pval	Base_pairing_probability	Shannon_corr
322	A	G	SNP	upstream_gene_variant	MODIFIER	.	.	.	EFF=upstream_gene_variant(MODIFIER||14||820|thrA|protein_coding|CODING|ACT37695||1),upstream_gene_variant(MODIFIER||2478||310|thrB|protein_coding|CODING|ACT37696||1),upstream_gene_variant(MODIFIER||3411||428|thrC|protein_coding|CODING|ACT37697||1),upstream_gene_variant(MODIFIER||4910||98|yaaX|protein_coding|CODING|ACT37698||1),downstream_gene_variant(MODIFIER||67||21|thrL|protein_coding|CODING|AC…	.	.	NA	NA	.	.	.	.	.	.	.	.	.	.	.	.	.	.	.	.	.	.	.	.
1624	T	C	SNP	missense_variant	MODERATE	aTt/aCt	p.Ile430Thr/c.1289T>C	thrA	EFF=missense_variant(MODERATE|MISSENSE|aTt/aCt|p.Ile430Thr/c.1289T>C|820|thrA|protein_coding|CODING|ACT37695|1|1),upstream_gene_variant(MODIFIER||1176||310|thrB|protein_coding|CODING|ACT37696||1),upstream_gene_variant(MODIFIER||2109||428|thrC|protein_coding|CODING|ACT37697||1),upstream_gene_variant(MODIFIER||3608||98|yaaX|protein_coding|CODING|ACT37698||1),downstream_gene_variant(MODIFIER||1369||…	221	518	COG0527	E	NO	336	2798	+	T1289C	-1036.36	-1038.95	1.03e-28	1.06e-28	478.13	462.53	0.5387	0.0162	1278-1346	0.7625	0.9453	1280-1329	0.7783	0.999365	0.991924
6701	C	T	SNP	missense_variant	MODERATE	atG/atA	p.Met419Ile/c.1257G>A	yaaJ	EFF=missense_variant(MODERATE|MISSENSE|atG/atA|p.Met419Ile/c.1257G>A|476|yaaJ|protein_coding|CODING|ACT37700|1|1),upstream_gene_variant(MODIFIER||1535||317|talB|protein_coding|CODING|ACT37701||1),upstream_gene_variant(MODIFIER||2603||195|mogA|protein_coding|CODING|ACT37702||1),upstream_gene_variant(MODIFIER||4127||161|htgA|protein_coding|CODING|ACT37705||1),upstream_gene_variant(MODIFIER||244||25…	5	46	COG1115	E	NO	6527	7957	-	G1257A	-595.11	-589.83	5.24e-15	4.81e-15	417.23	459.64	0.5147	0.0778	1232-1281	0.3469	0.6516	1232-1281	0.3624	0.995164	0.997405
9897	T	TC	INS	upstream_gene_variant	MODIFIER	.	.	.	EFF=upstream_gene_variant(MODIFIER||930||161|htgA|protein_coding|CODING|ACT37705||1),upstream_gene_variant(MODIFIER||3441||258|yaaA|protein_coding|CODING|ACT37699||1),upstream_gene_variant(MODIFIER||2263||638|dnaK|protein_coding|CODING|ACT37707||1),upstream_gene_variant(MODIFIER||1941||476|yaaJ|protein_coding|CODING|ACT37700||1),upstream_gene_variant(MODIFIER||4268||376|dnaJ|protein_coding|CODING…	.	.	NA	NA	.	.	.	.	.	.	.	.	.	.	.	.	.	.	.	.	.	.	.	.
16961	A	AGG	INS	upstream_gene_variant	MODIFIER	.	.	.	EFF=upstream_gene_variant(MODIFIER||526||388|nhaA|protein_coding|CODING|ACT37712||1|WARNING_TRANSCRIPT_NO_START_CODON),upstream_gene_variant(MODIFIER||1752||301|nhaR|protein_coding|CODING|ACT37713||1),upstream_gene_variant(MODIFIER||61||50|hokC|protein_coding|CODING|ACT37710||1),upstream_gene_variant(MODIFIER||4||69|mokC|protein_coding|CODING|ACT37711||1),downstream_gene_variant(MODIFIER||2885||6…	.	.	NA	NA	.	.	.	.	.	.	.	.	.	.	.	.	.	.	.	.	.	.	.	.
16967	C	G	SNP	upstream_gene_variant	MODIFIER	.	.	.	EFF=upstream_gene_variant(MODIFIER||521||388|nhaA|protein_coding|CODING|ACT37712||1|WARNING_TRANSCRIPT_NO_START_CODON),upstream_gene_variant(MODIFIER||1747||301|nhaR|protein_coding|CODING|ACT37713||1),upstream_gene_variant(MODIFIER||66||50|hokC|protein_coding|CODING|ACT37710||1),upstream_gene_variant(MODIFIER||9||69|mokC|protein_coding|CODING|ACT37711||1),downstream_gene_variant(MODIFIER||2890||6…	.	.	NA	NA	.	.	.	.	.	.	.	.	.	.	.	.	.	.	.	.	.	.	.	.
18220	C	T	SNP	missense_variant	MODERATE	Cgt/Tgt	p.Arg245Cys/c.733C>T	nhaA	EFF=missense_variant(MODERATE|MISSENSE|Cgt/Tgt|p.Arg245Cys/c.733C>T|388|nhaA|protein_coding|CODING|ACT37712|1|1|WARNING_TRANSCRIPT_NO_START_CODON),upstream_gene_variant(MODIFIER||494||301|nhaR|protein_coding|CODING|ACT37713||1),upstream_gene_variant(MODIFIER||1319||50|hokC|protein_coding|CODING|ACT37710||1),upstream_gene_variant(MODIFIER||1262||69|mokC|protein_coding|CODING|ACT37711||1),downstrea…	342	131	COG3004	P	NO	17488	18654	+	C733T	-513.07	-510.9	2.15e-11	2.39e-11	398.38	407.75	0.5436	0.1566	724-773	0.1627	0.5227	724-773	0.292	0.836649	0.839746
33754	C	T	SNP	synonymous_variant	LOW	gaC/gaT	p.Asp11Asp/c.33C>T	carA	EFF=synonymous_variant(LOW|SILENT|gaC/gaT|p.Asp11Asp/c.33C>T|382|carA|protein_coding|CODING|ACT37730|1|1),upstream_gene_variant(MODIFIER||1134||1073|carB|protein_coding|CODING|ACT37731||1),upstream_gene_variant(MODIFIER||4617||131|caiF|protein_coding|CODING|ACT37732||1),downstream_gene_variant(MODIFIER||4475||938|ileS|protein_coding|CODING|ACT37724||1),downstream_gene_variant(MODIFIER||3981||164|…	36	335	COG0505	EF	NO	33722	34870	+	C33T	-477.96	-475.44	1.51e-11	2.22e-11	110.64	125.85	0.4721	0.0177	20-227	0.7044	0.8886	33-144	0.6234	0.981665	0.954808
35916	T	C	SNP	synonymous_variant	LOW	cgT/cgC	p.Arg343Arg/c.1029T>C	carB	EFF=synonymous_variant(LOW|SILENT|cgT/cgC|p.Arg343Arg/c.1029T>C|1073|carB|protein_coding|CODING|ACT37731|1|1),upstream_gene_variant(MODIFIER||2455||131|caiF|protein_coding|CODING|ACT37732||1),downstream_gene_variant(MODIFIER||4617||316|ispH|protein_coding|CODING|ACT37727||1),downstream_gene_variant(MODIFIER||3637||304|rihC|protein_coding|CODING|ACT37728||1),downstream_gene_variant(MODIFIER||2649|…	21	156	COG0458	EF	NO	34888	38109	+	T1029C	-1432.32	-1432.32	2.71e-29	2.45e-29	524.13	560.26	0.5561	0.0105	1013-1064	0.8282	0.9264	1004-1057	0.7367	0.924774	0.781224
40541	A	G	SNP	missense_variant	MODERATE	gTg/gCg	p.Val498Ala/c.1493T>C	caiC	EFF=missense_variant(MODERATE|MISSENSE|gTg/gCg|p.Val498Ala/c.1493T>C|522|caiC|protein_coding|CODING|ACT37735|1|1),upstream_gene_variant(MODIFIER||976||196|caiE|protein_coding|CODING|ACT37733||1|WARNING_TRANSCRIPT_NO_START_CODON),upstream_gene_variant(MODIFIER||77||297|caiD|protein_coding|CODING|ACT37734||1),downstream_gene_variant(MODIFIER||2432||1073|carB|protein_coding|CODING|ACT37731||1),downs…	4	22	COG0318	IQ	NO	40465	42033	-	T1493C	-646.52	-646.49	7.83e-17	9.68e-17	285.02	285.79	0.426	0.0709	1479-1532	0.3756	0.7845	1474-1523	0.5202	0.993297	0.957441
44252	T	C	SNP	missense_variant	MODERATE	Atg/Gtg	p.Met110Val/c.328A>G	caiA	EFF=missense_variant(MODERATE|MISSENSE|Atg/Gtg|p.Met110Val/c.328A>G|380|caiA|protein_coding|CODING|ACT37736|1|1),upstream_gene_variant(MODIFIER||4687||196|caiE|protein_coding|CODING|ACT37733||1|WARNING_TRANSCRIPT_NO_START_CODON),upstream_gene_variant(MODIFIER||3788||297|caiD|protein_coding|CODING|ACT37734||1),upstream_gene_variant(MODIFIER||2346||256|fixA|protein_coding|CODING|ACT37738||1),upstre…	10	18	COG1960	I	NO	43437	44579	-	A328G	-497.63	-504.4	5.27e-12	3.74e-11	282.13	176.56	0.5636	0.0355	292-341	0.5925	0.8417	292-341	0.5942	0.986341	0.947498
45616	C	T	SNP	missense_variant	MODERATE	cGc/cAc	p.Arg170His/c.509G>A	caiT	EFF=missense_variant(MODERATE|MISSENSE|cGc/cAc|p.Arg170His/c.509G>A|504|caiT|protein_coding|CODING|ACT37737|1|1),upstream_gene_variant(MODIFIER||982||256|fixA|protein_coding|CODING|ACT37738||1),upstream_gene_variant(MODIFIER||3583||522|caiC|protein_coding|CODING|ACT37735||1),upstream_gene_variant(MODIFIER||1767||313|fixB|protein_coding|CODING|ACT37739||1),upstream_gene_variant(MODIFIER||2759||428…	0	26	COG1292	M	NO	44610	46124	-	G509A	-630.88	-630.88	7.61e-16	1.07e-15	202.98	209.01	0.5387	0.0162	504-553	0.7627	0.9579	474-543	0.8098	0.967333	0.861077
50855	A	G	SNP	missense_variant	MODERATE	aAc/aGc	p.Asn285Ser/c.854A>G	yaaU	EFF=missense_variant(MODERATE|MISSENSE|aAc/aGc|p.Asn285Ser/c.854A>G|443|yaaU|protein_coding|CODING|ACT37742|1|1),upstream_gene_variant(MODIFIER||4731||504|caiT|protein_coding|CODING|ACT37737||1),upstream_gene_variant(MODIFIER||586||176|yabF|protein_coding|CODING|ACT37743||1),upstream_gene_variant(MODIFIER||1109||620|kefC|protein_coding|CODING|ACT37744||1),upstream_gene_variant(MODIFIER||3163||159…	0	55	COG0477	GEPR	NO	50002	51333	+	A854G-T1108C	-611.46	-613.56	1.96e-14	1.89e-14	174.31	181.37	0.5344	0.341	840-905	0.0306	0.0993	831-880	0.1036	0.941859	0.968465
51109	T	C	SNP	missense_variant	MODERATE	Tct/Cct	p.Ser370Pro/c.1108T>C	yaaU	EFF=missense_variant(MODERATE|MISSENSE|Tct/Cct|p.Ser370Pro/c.1108T>C|443|yaaU|protein_coding|CODING|ACT37742|1|1),upstream_gene_variant(MODIFIER||4985||504|caiT|protein_coding|CODING|ACT37737||1),upstream_gene_variant(MODIFIER||332||176|yabF|protein_coding|CODING|ACT37743||1),upstream_gene_variant(MODIFIER||855||620|kefC|protein_coding|CODING|ACT37744||1),upstream_gene_variant(MODIFIER||2909||159…	0	55	COG0477	GEPR	NO	50002	51333	+	A854G-T1108C	-611.46	-613.56	1.96e-14	1.89e-14	174.31	181.37	0.5344	0.341	840-905	0.0306	0.0993	831-880	0.1036	0.941859	0.968465
60901	A	G	SNP	missense_variant	MODERATE	gTc/gCc	p.Val135Ala/c.404T>C	imp	EFF=missense_variant(MODERATE|MISSENSE|gTc/gCc|p.Val135Ala/c.404T>C|784|imp|protein_coding|CODING|ACT37751|1|1),upstream_gene_variant(MODIFIER||658||271|djlA|protein_coding|CODING|ACT37752||1),upstream_gene_variant(MODIFIER||4276||273|ksgA|protein_coding|CODING|ACT37748||1),upstream_gene_variant(MODIFIER||3290||329|pdxA|protein_coding|CODING|ACT37749||1),upstream_gene_variant(MODIFIER||2004||428|…	374	230	COG1452	M	NO	58950	61304	-	T404C	-903.17	-900.76	3.6e-27	2.01e-27	407.28	456.82	0.5411	0.2021	398-496	0.1056	-0.0114	398-467	0.0753	0.963736	0.943218
63409	A	G	SNP	missense_variant	MODERATE	aTc/aCc	p.Ile887Thr/c.2660T>C	rapA (hepA)	EFF=missense_variant(MODERATE|MISSENSE|aTc/aCc|p.Ile887Thr/c.2660T>C|968|hepA|protein_coding|CODING|ACT37754|1|1),upstream_gene_variant(MODIFIER||4512||428|surA|protein_coding|CODING|ACT37750||1),upstream_gene_variant(MODIFIER||2105||784|imp|protein_coding|CODING|ACT37751||1),upstream_gene_variant(MODIFIER||259||219|rluA|protein_coding|CODING|ACT37753||1),downstream_gene_variant(MODIFIER||2824||7…	291	56	COG0553	KL	NO	63162	66068	-	T2660C	-1246.94	-1249.6	1.72e-26	3.53e-26	667.91	644.83	0.5561	0.0302	2645-2694	0.6335	0.9336	2658-2707	0.7519	0.998156	0.984779
67239	T	C	SNP	missense_variant	MODERATE	cAc/cGc	p.His449Arg/c.1346A>G	polB	EFF=missense_variant(MODERATE|MISSENSE|cAc/cGc|p.His449Arg/c.1346A>G|783|polB|protein_coding|CODING|ACT37755|1|1|WARNING_TRANSCRIPT_NO_START_CODON),upstream_gene_variant(MODIFIER||4089||219|rluA|protein_coding|CODING|ACT37753||1),upstream_gene_variant(MODIFIER||1171||968|hepA|protein_coding|CODING|ACT37754||1),downstream_gene_variant(MODIFIER||4865||271|djlA|protein_coding|CODING|ACT37752||1),dow…	11	28	COG0417	L	NO	66233	68584	-	A1346G	-1018.13	-1018.13	1.55e-25	4.4e-26	419.59	398.2	0.581	0.0003	1248-1347	0.9892	0.9995	1250-1418	0.9867	0.999975	0.9994
73693	A	G	SNP	missense_variant	MODERATE	aAc/aGc	p.Asn168Ser/c.503A>G	araC	EFF=missense_variant(MODERATE|MISSENSE|aAc/aGc|p.Asn168Ser/c.503A>G|292|araC|protein_coding|CODING|ACT37759|1|1),upstream_gene_variant(MODIFIER||462||254|yabI|protein_coding|CODING|ACT37760||1),upstream_gene_variant(MODIFIER||4339||231|araD|protein_coding|CODING|ACT37756||1),upstream_gene_variant(MODIFIER||2552||500|araA|protein_coding|CODING|ACT37757||1),upstream_gene_variant(MODIFIER||841||566|…	27	87	COG2207	K	NO	73191	74069	+	A503G	-370.52	-370.52	4.67e-10	4.67e-10	232.07	232.07	0.5461	0	485-534	1	1	363-650	0.9995	1	1
75888	C	T	SNP	missense_variant	MODERATE	Gtg/Atg	p.Val480Met/c.1438G>A	thiP	EFF=missense_variant(MODERATE|MISSENSE|Gtg/Atg|p.Val480Met/c.1438G>A|536|thiP|protein_coding|CODING|ACT37762|1|1),upstream_gene_variant(MODIFIER||4747||500|araA|protein_coding|CODING|ACT37757||1),upstream_gene_variant(MODIFIER||3036||566|araB|protein_coding|CODING|ACT37758||1),upstream_gene_variant(MODIFIER||4537||392|setA|protein_coding|CODING|ACT37765||1),upstream_gene_variant(MODIFIER||157||23…	18	31	COG1178	P	NO	75715	77325	-	T1026C-G1143A-G1438A	-779.53	-779.53	4.16e-17	4.44e-17	310.04	318.39	0.5674	0.2018	991-1049	0.1059	-0.3639	999-1048	0.0208	0.977432	0.947612
76183	C	T	SNP	missense_variant	MODERATE	atG/atA	p.Met381Ile/c.1143G>A	thiP	EFF=missense_variant(MODERATE|MISSENSE|atG/atA|p.Met381Ile/c.1143G>A|536|thiP|protein_coding|CODING|ACT37762|1|1),upstream_gene_variant(MODIFIER||3331||566|araB|protein_coding|CODING|ACT37758||1),upstream_gene_variant(MODIFIER||4242||392|setA|protein_coding|CODING|ACT37765||1),upstream_gene_variant(MODIFIER||452||232|yabJ|protein_coding|CODING|ACT37761||1),downstream_gene_variant(MODIFIER||1118||…	18	31	COG1178	P	NO	75715	77325	-	T1026C-G1143A-G1438A	-779.53	-779.53	4.16e-17	4.44e-17	310.04	318.39	0.5674	0.2018	991-1049	0.1059	-0.3639	999-1048	0.0208	0.977432	0.947612
76300	A	G	SNP	synonymous_variant	LOW	ggT/ggC	p.Gly342Gly/c.1026T>C	thiP	EFF=synonymous_variant(LOW|SILENT|ggT/ggC|p.Gly342Gly/c.1026T>C|536|thiP|protein_coding|CODING|ACT37762|1|1),upstream_gene_variant(MODIFIER||3448||566|araB|protein_coding|CODING|ACT37758||1),upstream_gene_variant(MODIFIER||4125||392|setA|protein_coding|CODING|ACT37765||1),upstream_gene_variant(MODIFIER||569||232|yabJ|protein_coding|CODING|ACT37761||1),downstream_gene_variant(MODIFIER||1001||327|t…	18	31	COG1178	P	NO	75715	77325	-	T1026C-G1143A-G1438A	-779.53	-779.53	4.16e-17	4.44e-17	310.04	318.39	0.5674	0.2018	991-1049	0.1059	-0.3639	999-1048	0.0208	0.977432	0.947612
77649	T	C	SNP	synonymous_variant	LOW	gtA/gtG	p.Val212Val/c.636A>G	tbpA	EFF=synonymous_variant(LOW|SILENT|gtA/gtG|p.Val212Val/c.636A>G|327|tbpA|protein_coding|CODING|ACT37763|1|1|WARNING_TRANSCRIPT_NO_START_CODON),upstream_gene_variant(MODIFIER||4797||566|araB|protein_coding|CODING|ACT37758||1),upstream_gene_variant(MODIFIER||2776||392|setA|protein_coding|CODING|ACT37765||1),upstream_gene_variant(MODIFIER||1918||232|yabJ|protein_coding|CODING|ACT37761||1),upstream_ge…	85	110	COG4143	H	NO	77301	78284	-	A636G	-388.39	-391.18	6.85e-12	1.36e-11	188.14	197.68	0.5436	0.089	598-649	0.323	0.6396	569-688	0.3779	0.957824	0.904864
80523	T	C	SNP	synonymous_variant	LOW	gcT/gcC	p.Ala33Ala/c.99T>C	setA	EFF=synonymous_variant(LOW|SILENT|gcT/gcC|p.Ala33Ala/c.99T>C|392|setA|protein_coding|CODING|ACT37765|1|1),upstream_gene_variant(MODIFIER||4792||232|yabJ|protein_coding|CODING|ACT37761||1),upstream_gene_variant(MODIFIER||3198||536|thiP|protein_coding|CODING|ACT37762||1),upstream_gene_variant(MODIFIER||2239||327|tbpA|protein_coding|CODING|ACT37763||1|WARNING_TRANSCRIPT_NO_START_CODON),upstream_gene…	42	73	COG0477	GEPR	NO	.	.	.	.	.	.	.	.	.	.	.	.	.	.	.	.	.	.	.
80737	A	G	SNP	missense_variant	MODERATE	Acg/Gcg	p.Thr105Ala/c.313A>G	setA	EFF=missense_variant(MODERATE|MISSENSE|Acg/Gcg|p.Thr105Ala/c.313A>G|392|setA|protein_coding|CODING|ACT37765|1|1),upstream_gene_variant(MODIFIER||3412||536|thiP|protein_coding|CODING|ACT37762||1),upstream_gene_variant(MODIFIER||2453||327|tbpA|protein_coding|CODING|ACT37763||1|WARNING_TRANSCRIPT_NO_START_CODON),upstream_gene_variant(MODIFIER||634||551|yabN|protein_coding|CODING|ACT37764||1),downstr…	42	73	COG0477	GEPR	NO	.	.	.	.	.	.	.	.	.	.	.	.	.	.	.	.	.	.	.
81434	C	CG	INS	frameshift_variant	HIGH	gcg/gcGg	p.Ala337_Gly338fs/c.1011_1012insG	setA	EFF=frameshift_variant(HIGH||gcg/gcGg|p.Ala337_Gly338fs/c.1011_1012insG|392|setA|protein_coding|CODING|ACT37765|1|1),upstream_gene_variant(MODIFIER||4110||536|thiP|protein_coding|CODING|ACT37762||1),upstream_gene_variant(MODIFIER||3151||327|tbpA|protein_coding|CODING|ACT37763||1|WARNING_TRANSCRIPT_NO_START_CODON),upstream_gene_variant(MODIFIER||1332||551|yabN|protein_coding|CODING|ACT37764||1),do…	42	73	COG0477	GEPR	NO	.	.	.	.	.	.	.	.	.	.	.	.	.	.	.	.	.	.	.
83320	C	T	SNP	missense_variant	MODERATE	Gtc/Atc	p.Val117Ile/c.349G>A	leuC	EFF=missense_variant(MODERATE|MISSENSE|Gtc/Atc|p.Val117Ile/c.349G>A|466|leuC|protein_coding|CODING|ACT37767|1|1),upstream_gene_variant(MODIFIER||3217||551|yabN|protein_coding|CODING|ACT37764||1),upstream_gene_variant(MODIFIER||3852||314|leuO|protein_coding|CODING|ACT37771||1),upstream_gene_variant(MODIFIER||1063||201|leuD|protein_coding|CODING|ACT37766||1),downstream_gene_variant(MODIFIER||351||3…	9	594	COG0065	E	NO	82268	83668	-	G349A	-602.85	-600.07	1.03e-12	4.41e-13	106.83	122.49	0.5486	0.0011	276-388	0.9725	0.9908	332-383	0.9232	0.99326	0.977785
90295	T	C	SNP	synonymous_variant	LOW	cgT/cgC	p.Arg45Arg/c.135T>C	ilvH	EFF=synonymous_variant(LOW|SILENT|cgT/cgC|p.Arg45Arg/c.135T>C|163|ilvH|protein_coding|CODING|ACT37773|1|1),upstream_gene_variant(MODIFIER||537||334|fruR|protein_coding|CODING|ACT37774||1|WARNING_TRANSCRIPT_NO_START_CODON),upstream_gene_variant(MODIFIER||3962||523|leuA|protein_coding|CODING|ACT37769||1),upstream_gene_variant(MODIFIER||3783||28|leuL|protein_coding|CODING|ACT37770||1),upstream_gene_…	7	120	COG0440	E	NO	90161	90652	+	T135C	-199.7	-201.84	1.24e-05	1.31e-05	45.14	45.04	0.5045	0.0001	132-216	0.9973	0.9996	136-212	0.9878	0.999949	0.999726
90699	CT	C	DEL	upstream_gene_variant	MODIFIER	.	.	.	EFF=upstream_gene_variant(MODIFIER||132||334|fruR|protein_coding|CODING|ACT37774||1|WARNING_TRANSCRIPT_NO_START_CODON),upstream_gene_variant(MODIFIER||4367||523|leuA|protein_coding|CODING|ACT37769||1),upstream_gene_variant(MODIFIER||4188||28|leuL|protein_coding|CODING|ACT37770||1),upstream_gene_variant(MODIFIER||1738||152|yabB|protein_coding|CODING|ACT37775||1),upstream_gene_variant(MODIFIER||219…	.	.	NA	NA	.	.	.	.	.	.	.	.	.	.	.	.	.	.	.	.	.	.	.	.
94739	A	G	SNP	missense_variant	MODERATE	Act/Gct	p.Thr175Ala/c.523A>G	ftsI	EFF=missense_variant(MODERATE|MISSENSE|Act/Gct|p.Thr175Ala/c.523A>G|588|ftsI|protein_coding|CODING|ACT37778|1|1),upstream_gene_variant(MODIFIER||1231||495|murE|protein_coding|CODING|ACT37779||1|WARNING_TRANSCRIPT_NO_START_CODON),upstream_gene_variant(MODIFIER||2715||452|murF|protein_coding|CODING|ACT37780||1),upstream_gene_variant(MODIFIER||4067||360|mraY|protein_coding|CODING|ACT37781||1),downst…	117	72	COG0768	M	YES	94217	95983	+	A523G	-793.07	-794.48	3.76e-15	7.55e-15	252.95	364.09	0.5237	0.023	520-575	0.6948	0.6798	520-579	0.4127	0.996465	0.937705
96225	T	C	SNP	missense_variant	MODERATE	Tat/Cat	p.Tyr86His/c.256T>C	murE	EFF=missense_variant(MODERATE|MISSENSE|Tat/Cat|p.Tyr86His/c.256T>C|495|murE|protein_coding|CODING|ACT37779|1|1|WARNING_TRANSCRIPT_NO_START_CODON),upstream_gene_variant(MODIFIER||1229||452|murF|protein_coding|CODING|ACT37780||1),upstream_gene_variant(MODIFIER||2581||360|mraY|protein_coding|CODING|ACT37781||1),upstream_gene_variant(MODIFIER||3666||438|murD|protein_coding|CODING|ACT37782||1),upstrea…	143	79	COG0769	M	YES	95970	97457	+	T256C-C1115T	-696.46	-698.61	9.47e-17	1.68e-16	387.02	381.72	0.5667	0.1721	1073-1122	0.1402	0.4238	1074-1123	0.2335	0.949041
97084	C	T	SNP	missense_variant	MODERATE	gCg/gTg	p.Ala372Val/c.1115C>T	murE	EFF=missense_variant(MODERATE|MISSENSE|gCg/gTg|p.Ala372Val/c.1115C>T|495|murE|protein_coding|CODING|ACT37779|1|1|WARNING_TRANSCRIPT_NO_START_CODON),upstream_gene_variant(MODIFIER||370||452|murF|protein_coding|CODING|ACT37780||1),upstream_gene_variant(MODIFIER||1722||360|mraY|protein_coding|CODING|ACT37781||1),upstream_gene_variant(MODIFIER||2807||438|murD|protein_coding|CODING|ACT37782||1),upstre…	143	79	COG0769	M	YES	95970	97457	+	T256C-C1115T	-696.46	-698.61	9.47e-17	1.68e-16	387.02	381.72	0.5667	0.1721	1073-1122	0.1402	0.4238	1074-1123	0.2335	0.949041
97973	A	G	SNP	missense_variant	MODERATE	Act/Gct	p.Thr174Ala/c.520A>G	murF	EFF=missense_variant(MODERATE|MISSENSE|Act/Gct|p.Thr174Ala/c.520A>G|452|murF|protein_coding|CODING|ACT37780|1|1),upstream_gene_variant(MODIFIER||833||360|mraY|protein_coding|CODING|ACT37781||1),upstream_gene_variant(MODIFIER||1918||438|murD|protein_coding|CODING|ACT37782||1),upstream_gene_variant(MODIFIER||3234||414|ftsW|protein_coding|CODING|ACT37783||1),upstream_gene_variant(MODIFIER||4475||355…	111	47	COG0770	M	NO	97454	98812	+	A520G	-589.69	-589.29	4.32e-14	3.37e-14	215.81	250.25	0.5486	0.3774	483-532	0.0225	-0.3037	503-568	0.027	0.97722	0.870767
100466	A	G	SNP	synonymous_variant	LOW	ttA/ttG	p.Leu192Leu/c.576A>G	murD	EFF=synonymous_variant(LOW|SILENT|ttA/ttG|p.Leu192Leu/c.576A>G|438|murD|protein_coding|CODING|ACT37782|1|1),upstream_gene_variant(MODIFIER||741||414|ftsW|protein_coding|CODING|ACT37783||1),upstream_gene_variant(MODIFIER||1982||355|murG|protein_coding|CODING|ACT37784||1),upstream_gene_variant(MODIFIER||3103||491|murC|protein_coding|CODING|ACT37785||1),upstream_gene_variant(MODIFIER||4571||306|ddlB…	73	42	COG0771	M	YES	99891	101207	+	A576G	-588.37	-589.25	1.86e-15	1.07e-15	309.68	276.89	0.5162	0.0077	569-661	0.8654	0.9647	570-661	0.8286	0.996108	0.993771
101716	A	G	SNP	synonymous_variant	LOW	gaA/gaG	p.Glu170Glu/c.510A>G	ftsW	EFF=synonymous_variant(LOW|SILENT|gaA/gaG|p.Glu170Glu/c.510A>G|414|ftsW|protein_coding|CODING|ACT37783|1|1),upstream_gene_variant(MODIFIER||732||355|murG|protein_coding|CODING|ACT37784||1),upstream_gene_variant(MODIFIER||1853||491|murC|protein_coding|CODING|ACT37785||1),upstream_gene_variant(MODIFIER||3321||306|ddlB|protein_coding|CODING|ACT37786||1),upstream_gene_variant(MODIFIER||4243||276|ftsQ…	137	74	COG0772	D	YES	101207	102451	+	A510G	-555.39	-555.48	5.6e-15	8.15e-15	248.97	327.54	0.5312	0.0404	462-524	0.5585	0.5701	465-524	0.3244	0.936829	0.838277
104024	C	T	SNP	synonymous_variant	LOW	aaC/aaT	p.Asn152Asn/c.456C>T	murC	EFF=synonymous_variant(LOW|SILENT|aaC/aaT|p.Asn152Asn/c.456C>T|491|murC|protein_coding|CODING|ACT37785|1|1),upstream_gene_variant(MODIFIER||1013||306|ddlB|protein_coding|CODING|ACT37786||1),upstream_gene_variant(MODIFIER||1935||276|ftsQ|protein_coding|CODING|ACT37787||1),upstream_gene_variant(MODIFIER||2762||420|ftsA|protein_coding|CODING|ACT37788||1),upstream_gene_variant(MODIFIER||4085||383|fts…	145	63	COG0773	M	YES	103569	105044	+	C456T	-643.71	-642.9	6.99e-13	4.16e-13	468.37	469.73	0.5312	0.0259	415-464	0.6695	0.8912	415-464	0.6708	0.98069	0.951679
108461	A	G	SNP	missense_variant	MODERATE	gAa/gGa	p.Glu118Gly/c.353A>G	ftsZ	EFF=missense_variant(MODERATE|MISSENSE|gAa/gGa|p.Glu118Gly/c.353A>G|383|ftsZ|protein_coding|CODING|ACT37789|1|1),upstream_gene_variant(MODIFIER||900||305|lpxC|protein_coding|CODING|ACT37790||1),upstream_gene_variant(MODIFIER||2048||170|yacA|protein_coding|CODING|ACT37791||1|WARNING_TRANSCRIPT_NO_START_CODON),upstream_gene_variant(MODIFIER||2622||901|secA|protein_coding|CODING|ACT37792||1),downstr…	448	455	COG0206	D	YES	108109	109260	+	A353G	-491.56	-495.11	1.68e-14	4.75e-14	316.37	202.13	0.5511	0.1602	310-360	0.1571	0.1988	310-359	0.1352	0.998746	0.969859
112327	C	T	SNP	synonymous_variant	LOW	aaC/aaT	p.Asn415Asn/c.1245C>T	secA	EFF=synonymous_variant(LOW|SILENT|aaC/aaT|p.Asn415Asn/c.1245C>T|901|secA|protein_coding|CODING|ACT37792|1|1),upstream_gene_variant(MODIFIER||1521||129|mutT|protein_coding|CODING|ACT37793||1),upstream_gene_variant(MODIFIER||3921||347|guaC|protein_coding|CODING|ACT37797||1),downstream_gene_variant(MODIFIER||4279||420|ftsA|protein_coding|CODING|ACT37788||1),downstream_gene_variant(MODIFIER||3067||38…	277	96	COG0653	U	YES	111083	113788	+	C1245T-A1827G-T2048C-A2200G	-1093.72	-1093.72	3.85e-28	3.33e-28	639.31	658.09	0.5192	0.1238	1775-1835	0.2252	0.6905	1775-1835	0.4225	0.912931
112909	A	G	SNP	synonymous_variant	LOW	aaA/aaG	p.Lys609Lys/c.1827A>G	secA	EFF=synonymous_variant(LOW|SILENT|aaA/aaG|p.Lys609Lys/c.1827A>G|901|secA|protein_coding|CODING|ACT37792|1|1),upstream_gene_variant(MODIFIER||939||129|mutT|protein_coding|CODING|ACT37793||1),upstream_gene_variant(MODIFIER||3339||347|guaC|protein_coding|CODING|ACT37797||1),downstream_gene_variant(MODIFIER||4861||420|ftsA|protein_coding|CODING|ACT37788||1),downstream_gene_variant(MODIFIER||3649||383…	277	96	COG0653	U	YES	111083	113788	+	C1245T-A1827G-T2048C-A2200G	-1093.72	-1093.72	3.85e-28	3.33e-28	639.31	658.09	0.5192	0.1238	1775-1835	0.2252	0.6905	1775-1835	0.4225	0.912931
113130	T	C	SNP	missense_variant	MODERATE	gTg/gCg	p.Val683Ala/c.2048T>C	secA	EFF=missense_variant(MODERATE|MISSENSE|gTg/gCg|p.Val683Ala/c.2048T>C|901|secA|protein_coding|CODING|ACT37792|1|1),upstream_gene_variant(MODIFIER||718||129|mutT|protein_coding|CODING|ACT37793||1),upstream_gene_variant(MODIFIER||3118||347|guaC|protein_coding|CODING|ACT37797||1),downstream_gene_variant(MODIFIER||3870||383|ftsZ|protein_coding|CODING|ACT37789||1),downstream_gene_variant(MODIFIER||1323…	277	96	COG0653	U	YES	111083	113788	+	C1245T-A1827G-T2048C-A2200G	-1093.72	-1093.72	3.85e-28	3.33e-28	639.31	658.09	0.5192	0.1238	1775-1835	0.2252	0.6905	1775-1835	0.4225	0.912931
113282	A	G	SNP	missense_variant	MODERATE	Acg/Gcg	p.Thr734Ala/c.2200A>G	secA	EFF=missense_variant(MODERATE|MISSENSE|Acg/Gcg|p.Thr734Ala/c.2200A>G|901|secA|protein_coding|CODING|ACT37792|1|1),upstream_gene_variant(MODIFIER||566||129|mutT|protein_coding|CODING|ACT37793||1),upstream_gene_variant(MODIFIER||2966||347|guaC|protein_coding|CODING|ACT37797||1),downstream_gene_variant(MODIFIER||4022||383|ftsZ|protein_coding|CODING|ACT37789||1),downstream_gene_variant(MODIFIER||1171…	277	96	COG0653	U	YES	111083	113788	+	C1245T-A1827G-T2048C-A2200G	-1093.72	-1093.72	3.85e-28	3.33e-28	639.31	658.09	0.5192	0.1238	1775-1835	0.2252	0.6905	1775-1835	0.4225	0.912931
117337	C	T	SNP	missense_variant	MODERATE	Ggg/Agg	p.Gly398Arg/c.1192G>A	hofC	EFF=missense_variant(MODERATE|MISSENSE|Ggg/Agg|p.Gly398Arg/c.1192G>A|400|hofC|protein_coding|CODING|ACT37798|1|1),upstream_gene_variant(MODIFIER||2687||65|yacG|protein_coding|CODING|ACT37794||1),upstream_gene_variant(MODIFIER||1934||247|yacF|protein_coding|CODING|ACT37795||1),upstream_gene_variant(MODIFIER||1314||206|coaE|protein_coding|CODING|ACT37796||1),upstream_gene_variant(MODIFIER||4200||18…	6	25	COG1459	NU	NO	117326	118528	-	G1192A	-489.83	-486.64	1.04e-12	1e-12	348.48	417.29	0.5142	0.0738	1038-1199	0.2889	0.8483	1044-1196	0.5049	0.977875	0.906978
118961	T	C	SNP	missense_variant	MODERATE	Acc/Gcc	p.Thr315Ala/c.943A>G	hofB	EFF=missense_variant(MODERATE|MISSENSE|Acc/Gcc|p.Thr315Ala/c.943A>G|461|hofB|protein_coding|CODING|ACT37799|1|1),upstream_gene_variant(MODIFIER||4311||65|yacG|protein_coding|CODING|ACT37794||1),upstream_gene_variant(MODIFIER||3558||247|yacF|protein_coding|CODING|ACT37795||1),upstream_gene_variant(MODIFIER||2938||206|coaE|protein_coding|CODING|ACT37796||1),upstream_gene_variant(MODIFIER||2576||183…	4	27	COG2804	NU	NO	118518	119903	-	A943G	-553.26	-553.59	2.25e-14	1.64e-14	229.29	245.65	0.5636	0.0422	916-967	0.5465	0.7336	868-967	0.4647	0.952951	0.916994
121405	C	T	SNP	synonymous_variant	LOW	ctG/ctA	p.Leu15Leu/c.45G>A	nadC	EFF=synonymous_variant(LOW|SILENT|ctG/ctA|p.Leu15Leu/c.45G>A|297|nadC|protein_coding|CODING|ACT37801|1|1),upstream_gene_variant(MODIFIER||132||183|ampD|protein_coding|CODING|ACT37802||1),upstream_gene_variant(MODIFIER||680||284|ampE|protein_coding|CODING|ACT37803||1),upstream_gene_variant(MODIFIER||2877||400|hofC|protein_coding|CODING|ACT37798||1),upstream_gene_variant(MODIFIER||3491||254|pdhR|pr…	75	59	COG0157	H	NO	120556	121449	-	G45A	-340.79	-340.11	9.22e-10	5.87e-09	247.41	221.02	0.551	0.0001	44-118	0.9949	0.9996	40-167	0.9864	0.929442	0.837938
123538	A	G	SNP	missense_variant	MODERATE	gTg/gCg	p.Val273Ala/c.818T>C	aroP	EFF=missense_variant(MODERATE|MISSENSE|gTg/gCg|p.Val273Ala/c.818T>C|457|aroP|protein_coding|CODING|ACT37804|1|1),upstream_gene_variant(MODIFIER||1358||254|pdhR|protein_coding|CODING|ACT37805||1),upstream_gene_variant(MODIFIER||3635||461|hofB|protein_coding|CODING|ACT37799||1),upstream_gene_variant(MODIFIER||3185||146|ppdD|protein_coding|CODING|ACT37800||1),upstream_gene_variant(MODIFIER||2283||88…	26	201	COG1113	E	NO	122982	124355	-	G519A-T818C	-589.61	-588.33	3.39e-15	5.62e-16	526.77	367.05	0.53	0.075	511-595	0.3757	0.4442	517-571	0.2447	0.933972	0.920472
123837	C	T	SNP	stop_gained	HIGH	tgG/tgA	p.Trp173*/c.519G>A	aroP	EFF=stop_gained(HIGH|NONSENSE|tgG/tgA|p.Trp173*/c.519G>A|457|aroP|protein_coding|CODING|ACT37804|1|1),upstream_gene_variant(MODIFIER||1059||254|pdhR|protein_coding|CODING|ACT37805||1),upstream_gene_variant(MODIFIER||3934||461|hofB|protein_coding|CODING|ACT37799||1),upstream_gene_variant(MODIFIER||3484||146|ppdD|protein_coding|CODING|ACT37800||1),upstream_gene_variant(MODIFIER||1984||887|aceE|prot…	26	201	COG1113	E	NO	122982	124355	-	G519A-T818C	-589.61	-588.33	3.39e-15	5.62e-16	526.77	367.05	0.53	0.075	511-595	0.3757	0.4442	517-571	0.2447	0.933972	0.920472
130398	G	A	SNP	upstream_gene_variant	MODIFIER	.	.	.	EFF=upstream_gene_variant(MODIFIER||318||474|lpdA|protein_coding|CODING|ACT37808||1),upstream_gene_variant(MODIFIER||4021||865|acnB|protein_coding|CODING|ACT37810||1|WARNING_TRANSCRIPT_NO_START_CODON),downstream_gene_variant(MODIFIER||4738||254|pdhR|protein_coding|CODING|ACT37805||1),downstream_gene_variant(MODIFIER||1813||617|yacH|protein_coding|CODING|ACT37809||1),downstream_gene_variant(MODIFI…	.	.	NA	NA	.	.	.	.	.	.	.	.	.	.	.	.	.	.	.	.	.	.	.	.
133599	A	G	SNP	missense_variant	MODERATE	Tgg/Cgg	p.Trp156Arg/c.466T>C	yacH	EFF=missense_variant(MODERATE|MISSENSE|Tgg/Cgg|p.Trp156Arg/c.466T>C|617|yacH|protein_coding|CODING|ACT37809|1|1),upstream_gene_variant(MODIFIER||820||865|acnB|protein_coding|CODING|ACT37810||1|WARNING_TRANSCRIPT_NO_START_CODON),upstream_gene_variant(MODIFIER||3592||120|yacL|protein_coding|CODING|ACT37811||1),downstream_gene_variant(MODIFIER||3208||630|aceF|protein_coding|CODING|ACT37807||1),downs…	0	34	NA	NA	NO	132211	134064	-	T191C-T466C	-689.14	-687.94	6.73e-18	1.6e-18	312.09	285.14	0.536	0.0322	38-208	0.6139	0.811	57-194	0.5521	0.987199	0.976987
133874	A	G	SNP	missense_variant	MODERATE	gTa/gCa	p.Val64Ala/c.191T>C	yacH	EFF=missense_variant(MODERATE|MISSENSE|gTa/gCa|p.Val64Ala/c.191T>C|617|yacH|protein_coding|CODING|ACT37809|1|1),upstream_gene_variant(MODIFIER||545||865|acnB|protein_coding|CODING|ACT37810||1|WARNING_TRANSCRIPT_NO_START_CODON),upstream_gene_variant(MODIFIER||3317||120|yacL|protein_coding|CODING|ACT37811||1),downstream_gene_variant(MODIFIER||3483||630|aceF|protein_coding|CODING|ACT37807||1),downst…	0	34	NA	NA	NO	132211	134064	-	T191C-T466C	-689.14	-687.94	6.73e-18	1.6e-18	312.09	285.14	0.536	0.0322	38-208	0.6139	0.811	57-194	0.5521	0.987199	0.976987
138456	G	A	SNP	missense_variant	MODERATE	gCa/gTa	p.Ala271Val/c.812C>T	speE	EFF=missense_variant(MODERATE|MISSENSE|gCa/gTa|p.Ala271Val/c.812C>T|288|speE|protein_coding|CODING|ACT37813|1|1),upstream_gene_variant(MODIFIER||4392||617|yacH|protein_coding|CODING|ACT37809||1),upstream_gene_variant(MODIFIER||1430||516|cueO|protein_coding|CODING|ACT37815||1),upstream_gene_variant(MODIFIER||71||264|speD|protein_coding|CODING|ACT37812||1),downstream_gene_variant(MODIFIER||917||115…	755	219	COG0421	E	NO	138401	139267	-	C812T	-313.79	-313.16	3.46e-09	1.14e-09	251.83	266.99	0.5156	0.0589	809-858	0.4538	0.7938	809-858	0.5231	0.999816	0.998258
142170	C	T	SNP	missense_variant	MODERATE	cGt/cAt	p.Arg620His/c.1859G>A	gcd	EFF=missense_variant(MODERATE|MISSENSE|cGt/cAt|p.Arg620His/c.1859G>A|796|gcd|protein_coding|CODING|ACT37816|1|1),upstream_gene_variant(MODIFIER||3785||264|speD|protein_coding|CODING|ACT37812||1),upstream_gene_variant(MODIFIER||2064||178|hpt|protein_coding|CODING|ACT37817||1),upstream_gene_variant(MODIFIER||2903||288|speE|protein_coding|CODING|ACT37813||1),upstream_gene_variant(MODIFIER||2450||115…	57	47	COG4993	G	NO	141638	144028	-	G1859A	-1045.96	-1043.01	1.97e-24	8.15e-25	618.26	562.73	0.5436	0.0484	1732-1883	0.5075	0.7924	1859-1924	0.5301	0.988246	0.977208
145420	C	T	SNP	synonymous_variant	LOW	ctG/ctA	p.Leu18Leu/c.54G>A	yadF	EFF=synonymous_variant(LOW|SILENT|ctG/ctA|p.Leu18Leu/c.54G>A|220|yadF|protein_coding|CODING|ACT37818|1|1),upstream_gene_variant(MODIFIER||162||308|yadG|protein_coding|CODING|ACT37819||1),upstream_gene_variant(MODIFIER||1085||256|yadH|protein_coding|CODING|ACT37820||1),upstream_gene_variant(MODIFIER||1960||146|yadI|protein_coding|CODING|ACT37821||1),upstream_gene_variant(MODIFIER||2464||409|yadE|p…	567	489	COG0288	P	YES	144811	145473	-	G54A	-242.92	-240.18	4.55e-08	5.56e-08	114.14	127.55	0.4803	0.2577	41-90	0.0478	-0.1318	41-90	0.0435	0.954046	0.96291
146580	C	T	SNP	stop_gained	HIGH	Cag/Tag	p.Gln26*/c.76C>T	yadH	EFF=stop_gained(HIGH|NONSENSE|Cag/Tag|p.Gln26*/c.76C>T|256|yadH|protein_coding|CODING|ACT37820|1|1),upstream_gene_variant(MODIFIER||800||146|yadI|protein_coding|CODING|ACT37821||1),upstream_gene_variant(MODIFIER||1304||409|yadE|protein_coding|CODING|ACT37822||1),upstream_gene_variant(MODIFIER||2552||796|gcd|protein_coding|CODING|ACT37816||1),upstream_gene_variant(MODIFIER||3191||300|yadD|protein_…	86	60	COG0842	V	NO	146505	147275	+	C76T-A121G	-312.1	-310.04	7.07e-09	6.94e-09	90.44	92.95	0.4953	0.2832	18-92	0.0379	-0.2195	221-318	0.0299	0.964995	0.946758
146625	A	G	SNP	missense_variant	MODERATE	Atc/Gtc	p.Ile41Val/c.121A>G	yadH	EFF=missense_variant(MODERATE|MISSENSE|Atc/Gtc|p.Ile41Val/c.121A>G|256|yadH|protein_coding|CODING|ACT37820|1|1),upstream_gene_variant(MODIFIER||755||146|yadI|protein_coding|CODING|ACT37821||1),upstream_gene_variant(MODIFIER||1259||409|yadE|protein_coding|CODING|ACT37822||1),upstream_gene_variant(MODIFIER||2597||796|gcd|protein_coding|CODING|ACT37816||1),upstream_gene_variant(MODIFIER||3146||300|y…	86	60	COG0842	V	NO	146505	147275	+	C76T-A121G	-312.1	-310.04	7.07e-09	6.94e-09	90.44	92.95	0.4953	0.2832	18-92	0.0379	-0.2195	221-318	0.0299	0.964995	0.946758
151709	A	G	SNP	synonymous_variant	LOW	aaT/aaC	p.Asn232Asn/c.696T>C	panB	EFF=synonymous_variant(LOW|SILENT|aaT/aaC|p.Asn232Asn/c.696T>C|264|panB|protein_coding|CODING|ACT37826|1|1),upstream_gene_variant(MODIFIER||2212||126|panD|protein_coding|CODING|ACT37823||1),upstream_gene_variant(MODIFIER||111||283|panC|protein_coding|CODING|ACT37825||1|WARNING_TRANSCRIPT_NO_START_CODON),downstream_gene_variant(MODIFIER||4434||256|yadH|protein_coding|CODING|ACT37820||1),downstream…	199	170	COG0413	H	NO	151610	152404	-	T696C	-331.43	-331.43	3.29e-08	4.54e-08	196.89	208.99	0.5467	0.0184	676-757	0.7632	0.9206	685-792	0.74	0.991644	0.988664
153477	A	G	SNP	synonymous_variant	LOW	agT/agC	p.Ser129Ser/c.387T>C	yadC	EFF=synonymous_variant(LOW|SILENT|agT/agC|p.Ser129Ser/c.387T>C|448|yadC|protein_coding|CODING|ACT37827|1|1),upstream_gene_variant(MODIFIER||3980||126|panD|protein_coding|CODING|ACT37823||1),upstream_gene_variant(MODIFIER||1879||283|panC|protein_coding|CODING|ACT37825||1|WARNING_TRANSCRIPT_NO_START_CODON),upstream_gene_variant(MODIFIER||1073||264|panB|protein_coding|CODING|ACT37826||1),downstream_…	6	27	COG3539	NU	NO	152517	153863	-	T387C	-393.83	-393.84	5.77e-16	1.16e-16	396.64	423.56	0.3965	0.0558	227-414	0.3859	0.8036	237-407	0.5164	0.998233	0.991964
156366	C	T	SNP	synonymous_variant	LOW	acG/acA	p.Thr635Thr/c.1905G>A	htrE	EFF=synonymous_variant(LOW|SILENT|acG/acA|p.Thr635Thr/c.1905G>A|866|htrE|protein_coding|CODING|ACT37831|1|1|WARNING_TRANSCRIPT_NO_START_CODON),upstream_gene_variant(MODIFIER||4768||283|panC|protein_coding|CODING|ACT37825||1|WARNING_TRANSCRIPT_NO_START_CODON),upstream_gene_variant(MODIFIER||3962||264|panB|protein_coding|CODING|ACT37826||1),upstream_gene_variant(MODIFIER||2503||448|yadC|protein_cod…	2	17	COG3188	NU	NO	155670	158270	-	T735C-G1905A	-903.87	-902.62	2.9e-29	2.68e-29	452.86	455.5	0.443	0.0305	722-781	0.5738	0.8386	722-781	0.5608	0.972291
157536	A	G	SNP	synonymous_variant	LOW	cgT/cgC	p.Arg245Arg/c.735T>C	htrE	EFF=synonymous_variant(LOW|SILENT|cgT/cgC|p.Arg245Arg/c.735T>C|866|htrE|protein_coding|CODING|ACT37831|1|1|WARNING_TRANSCRIPT_NO_START_CODON),upstream_gene_variant(MODIFIER||3673||448|yadC|protein_coding|CODING|ACT37827||1),upstream_gene_variant(MODIFIER||3096||198|yadK|protein_coding|CODING|ACT37828||1),upstream_gene_variant(MODIFIER||2467||200|yadL|protein_coding|CODING|ACT37829||1),upstream_ge…	2	17	COG3188	NU	NO	155670	158270	-	T735C-G1905A	-903.87	-902.62	2.9e-29	2.68e-29	452.86	455.5	0.443	0.0305	722-781	0.5738	0.8386	722-781	0.5608	0.972291
160667	C	T	SNP	missense_variant	MODERATE	atG/atA	p.Met426Ile/c.1278G>A	pcnB	EFF=missense_variant(MODERATE|MISSENSE|atG/atA|p.Met426Ile/c.1278G>A|454|pcnB|protein_coding|CODING|ACT37835|1|1|WARNING_TRANSCRIPT_NO_START_CODON),upstream_gene_variant(MODIFIER||2397||866|htrE|protein_coding|CODING|ACT37831||1|WARNING_TRANSCRIPT_NO_START_CODON),upstream_gene_variant(MODIFIER||1622||246|ecpD|protein_coding|CODING|ACT37832||1),upstream_gene_variant(MODIFIER||933||194|yadN|protein…	283	90	COG0617	J	NO	160580	161944	-	G1129A-G1278A	-576.62	-574.99	2.81e-17	5.22e-17	372.74	380.17	0.5789	0.2022	1126-1175	0.1055	0.1052	1064-1141	0.1054	0.941653	0.833895
160816	C	T	SNP	missense_variant	MODERATE	Gca/Aca	p.Ala377Thr/c.1129G>A	pcnB	EFF=missense_variant(MODERATE|MISSENSE|Gca/Aca|p.Ala377Thr/c.1129G>A|454|pcnB|protein_coding|CODING|ACT37835|1|1|WARNING_TRANSCRIPT_NO_START_CODON),upstream_gene_variant(MODIFIER||2546||866|htrE|protein_coding|CODING|ACT37831||1|WARNING_TRANSCRIPT_NO_START_CODON),upstream_gene_variant(MODIFIER||1771||246|ecpD|protein_coding|CODING|ACT37832||1),upstream_gene_variant(MODIFIER||1082||194|yadN|protei…	283	90	COG0617	J	NO	160580	161944	-	G1129A-G1278A	-576.62	-574.99	2.81e-17	5.22e-17	372.74	380.17	0.5789	0.2022	1126-1175	0.1055	0.1052	1064-1141	0.1054	0.941653	0.833895
163841	C	T	SNP	missense_variant	MODERATE	aGc/aAc	p.Ser166Asn/c.497G>A	sfsA	EFF=missense_variant(MODERATE|MISSENSE|aGc/aAc|p.Ser166Asn/c.497G>A|234|sfsA|protein_coding|CODING|ACT37838|1|1),upstream_gene_variant(MODIFIER||4796||246|ecpD|protein_coding|CODING|ACT37832||1),upstream_gene_variant(MODIFIER||4107||194|yadN|protein_coding|CODING|ACT37833||1),upstream_gene_variant(MODIFIER||1115||809|hrpB|protein_coding|CODING|ACT37840||1|WARNING_TRANSCRIPT_NO_START_CODON),upstre…	62	86	COG1489	R	NO	163633	164337	-	G497A	-269.18	-267.89	6.18e-08	7.73e-08	113.75	103.01	0.4963	0.0062	496-607	0.8623	0.9687	497-559	0.8269	0.989001	0.964645
168951	C	T	SNP	synonymous_variant	LOW	ggC/ggT	p.Gly457Gly/c.1371C>T	mrcB	EFF=synonymous_variant(LOW|SILENT|ggC/ggT|p.Gly457Gly/c.1371C>T|841|mrcB|protein_coding|CODING|ACT37841|1|1),upstream_gene_variant(MODIFIER||4614||234|sfsA|protein_coding|CODING|ACT37838||1),upstream_gene_variant(MODIFIER||4069||176|ligT|protein_coding|CODING|ACT37839||1),upstream_gene_variant(MODIFIER||1375||747|fhuA|protein_coding|CODING|ACT37842||1),upstream_gene_variant(MODIFIER||3669||265|fh…	70	47	COG0744	M	NO	167581	170106	+	C1371T-C2109T-A2191G	-1132.3	-1133.61	3.72e-24	9e-24	574.02	567.52	0.5651	0.0258	2076-2194	0.6702	0.9467	2076-2194	0.7816	0.792222
169689	C	T	SNP	synonymous_variant	LOW	aaC/aaT	p.Asn703Asn/c.2109C>T	mrcB	EFF=synonymous_variant(LOW|SILENT|aaC/aaT|p.Asn703Asn/c.2109C>T|841|mrcB|protein_coding|CODING|ACT37841|1|1),upstream_gene_variant(MODIFIER||4807||176|ligT|protein_coding|CODING|ACT37839||1),upstream_gene_variant(MODIFIER||637||747|fhuA|protein_coding|CODING|ACT37842||1),upstream_gene_variant(MODIFIER||2931||265|fhuC|protein_coding|CODING|ACT37843||1),upstream_gene_variant(MODIFIER||3728||296|fhu…	70	47	COG0744	M	NO	167581	170106	+	C1371T-C2109T-A2191G	-1132.3	-1133.61	3.72e-24	9e-24	574.02	567.52	0.5651	0.0258	2076-2194	0.6702	0.9467	2076-2194	0.7816	0.792222
169771	A	G	SNP	missense_variant	MODERATE	Acc/Gcc	p.Thr731Ala/c.2191A>G	mrcB	EFF=missense_variant(MODERATE|MISSENSE|Acc/Gcc|p.Thr731Ala/c.2191A>G|841|mrcB|protein_coding|CODING|ACT37841|1|1),upstream_gene_variant(MODIFIER||4889||176|ligT|protein_coding|CODING|ACT37839||1),upstream_gene_variant(MODIFIER||555||747|fhuA|protein_coding|CODING|ACT37842||1),upstream_gene_variant(MODIFIER||2849||265|fhuC|protein_coding|CODING|ACT37843||1),upstream_gene_variant(MODIFIER||3646||29…	70	47	COG0744	M	NO	167581	170106	+	C1371T-C2109T-A2191G	-1132.3	-1133.61	3.72e-24	9e-24	574.02	567.52	0.5651	0.0258	2076-2194	0.6702	0.9467	2076-2194	0.7816	0.792222
170898	C	T	SNP	synonymous_variant	LOW	acC/acT	p.Thr191Thr/c.573C>T	fhuA	EFF=synonymous_variant(LOW|SILENT|acC/acT|p.Thr191Thr/c.573C>T|747|fhuA|protein_coding|CODING|ACT37842|1|1),upstream_gene_variant(MODIFIER||1722||265|fhuC|protein_coding|CODING|ACT37843||1),upstream_gene_variant(MODIFIER||2519||296|fhuD|protein_coding|CODING|ACT37844||1),upstream_gene_variant(MODIFIER||3406||660|fhuB|protein_coding|CODING|ACT37845||1|WARNING_TRANSCRIPT_NO_START_CODON),downstream_…	453	178	COG1629	P	NO	170326	172569	+	C573T	-907.37	-910.23	5.75e-24	2.34e-24	483.06	369.02	0.5262	0.1768	546-595	0.134	0.3298	536-595	0.1873	0.925798	0.833661
178040	C	A	SNP	missense_variant	MODERATE	aCc/aAc	p.Thr31Asn/c.92C>A	yadQ	EFF=missense_variant(MODERATE|MISSENSE|aCc/aAc|p.Thr31Asn/c.92C>A|473|yadQ|protein_coding|CODING|ACT37847|1|1),upstream_gene_variant(MODIFIER||1412||114|yadR|protein_coding|CODING|ACT37848||1),upstream_gene_variant(MODIFIER||4039||505|dgt|protein_coding|CODING|ACT37852||1),upstream_gene_variant(MODIFIER||316||426|hemL|protein_coding|CODING|ACT37846||1),downstream_gene_variant(MODIFIER||4623||265|…	34	37	COG0038	P	NO	177949	179370	+	C92A	-636.95	-636.95	3.04e-14	3.08e-14	200.34	199.59	0.5308	0.0459	72-263	0.5254	0.7798	122-240	0.5149	0.998964	0.986667
180055	C	G	SNP	missense_variant	MODERATE	Gcc/Ccc	p.Ala138Pro/c.412G>C	yadS	EFF=missense_variant(MODERATE|MISSENSE|Gcc/Ccc|p.Ala138Pro/c.412G>C|207|yadS|protein_coding|CODING|ACT37849|1|1),upstream_gene_variant(MODIFIER||2024||505|dgt|protein_coding|CODING|ACT37852||1),upstream_gene_variant(MODIFIER||2331||426|hemL|protein_coding|CODING|ACT37846||1),upstream_gene_variant(MODIFIER||3671||474|degP|protein_coding|CODING|ACT37853||1),downstream_gene_variant(MODIFIER||449||26…	60	44	COG2860	S	NO	179843	180466	-	G412C	-278.08	-277.37	2.16e-08	5.27e-08	167.92	224.06	0.5337	0.2258	384-433	0.0848	0.6124	385-436	0.356	0.988934	0.920726
183125	A	G	SNP	synonymous_variant	LOW	gcA/gcG	p.Ala349Ala/c.1047A>G	dgt	EFF=synonymous_variant(LOW|SILENT|gcA/gcG|p.Ala349Ala/c.1047A>G|505|dgt|protein_coding|CODING|ACT37852|1|1),upstream_gene_variant(MODIFIER||601||474|degP|protein_coding|CODING|ACT37853||1),upstream_gene_variant(MODIFIER||2180||385|cdaR|protein_coding|CODING|ACT37854||1),upstream_gene_variant(MODIFIER||2659||207|yadS|protein_coding|CODING|ACT37849||1),upstream_gene_variant(MODIFIER||1821||266|yadT…	217	122	NA	NA	NO	182079	183596	+	A1047G	-553.88	-555.13	1.2e-17	9.81e-18	345.72	343.99	0.419	0.075	863-1047	0.3095	0.4372	862-1002	0.2081	0.998402	0.98651
183799	C	T	SNP	missense_variant	MODERATE	aCg/aTg	p.Thr25Met/c.74C>T	degP	EFF=missense_variant(MODERATE|MISSENSE|aCg/aTg|p.Thr25Met/c.74C>T|474|degP|protein_coding|CODING|ACT37853|1|1),upstream_gene_variant(MODIFIER||1506||385|cdaR|protein_coding|CODING|ACT37854||1),upstream_gene_variant(MODIFIER||3333||207|yadS|protein_coding|CODING|ACT37849||1),upstream_gene_variant(MODIFIER||2495||266|yadT|protein_coding|CODING|ACT37850||1),upstream_gene_variant(MODIFIER||1804||232|…	159	129	COG0265	O	NO	183726	185150	+	C74T-A118G-A846G	-621.62	-621.3	2.89e-11	4.06e-11	236.31	238.03	0.5392	0.2394	796-845	0.0742	0.1339	755-846	0.1037	0.976957	0.952093
183843	A	G	SNP	missense_variant	MODERATE	Agc/Ggc	p.Ser40Gly/c.118A>G	degP	EFF=missense_variant(MODERATE|MISSENSE|Agc/Ggc|p.Ser40Gly/c.118A>G|474|degP|protein_coding|CODING|ACT37853|1|1),upstream_gene_variant(MODIFIER||1462||385|cdaR|protein_coding|CODING|ACT37854||1),upstream_gene_variant(MODIFIER||3377||207|yadS|protein_coding|CODING|ACT37849||1),upstream_gene_variant(MODIFIER||2539||266|yadT|protein_coding|CODING|ACT37850||1),upstream_gene_variant(MODIFIER||1848||232…	159	129	COG0265	O	NO	183726	185150	+	C74T-A118G-A846G	-621.62	-621.3	2.89e-11	4.06e-11	236.31	238.03	0.5392	0.2394	796-845	0.0742	0.1339	755-846	0.1037	0.976957	0.952093
184571	A	G	SNP	synonymous_variant	LOW	gaA/gaG	p.Glu282Glu/c.846A>G	degP	EFF=synonymous_variant(LOW|SILENT|gaA/gaG|p.Glu282Glu/c.846A>G|474|degP|protein_coding|CODING|ACT37853|1|1),upstream_gene_variant(MODIFIER||734||385|cdaR|protein_coding|CODING|ACT37854||1),upstream_gene_variant(MODIFIER||4105||207|yadS|protein_coding|CODING|ACT37849||1),upstream_gene_variant(MODIFIER||3267||266|yadT|protein_coding|CODING|ACT37850||1),upstream_gene_variant(MODIFIER||2576||232|pfs|…	159	129	COG0265	O	NO	183726	185150	+	C74T-A118G-A846G	-621.62	-621.3	2.89e-11	4.06e-11	236.31	238.03	0.5392	0.2394	796-845	0.0742	0.1339	755-846	0.1037	0.976957	0.952093
191867	C	T	SNP	missense_variant	MODERATE	gGc/gAc	p.Gly161Asp/c.482G>A	map	EFF=missense_variant(MODERATE|MISSENSE|gGc/gAc|p.Gly161Asp/c.482G>A|264|map|protein_coding|CODING|ACT37859|1|1),upstream_gene_variant(MODIFIER||4930||128|yaeH|protein_coding|CODING|ACT37855||1),upstream_gene_variant(MODIFIER||849||241|rpsB|protein_coding|CODING|ACT37860||1),upstream_gene_variant(MODIFIER||3956||270|yaeI|protein_coding|CODING|ACT37856||1),upstream_gene_variant(MODIFIER||1832||283|…	586	231	COG0024	J	YES	191554	192348	-	G482A	-306.95	-303.54	2.56e-08	3.61e-09	135.19	184.42	0.5062	0.1373	472-531	0.1968	0.5788	472-523	0.3307	0.933918	0.854396
196671	C	T	SNP	synonymous_variant	LOW	ggC/ggT	p.Gly103Gly/c.309C>T	ispC	EFF=synonymous_variant(LOW|SILENT|ggC/ggT|p.Gly103Gly/c.309C>T|398|ispC|protein_coding|CODING|ACT37864|1|1),upstream_gene_variant(MODIFIER||4323||264|map|protein_coding|CODING|ACT37859||1),upstream_gene_variant(MODIFIER||1074||253|uppS|protein_coding|CODING|ACT37865||1|WARNING_TRANSCRIPT_NO_START_CODON),upstream_gene_variant(MODIFIER||1848||285|cdsA|protein_coding|CODING|ACT37866||1),upstream_gen…	30	32	COG0743	I	YES	196363	197559	+	C309T	-478.92	-477.54	4e-15	1.82e-15	241.1	294.97	0.5037	0.0055	208-327	0.8956	0.9923	224-319	0.9308	0.964663	0.891179
198400	T	C	SNP	missense_variant	MODERATE	gTt/gCt	p.Val219Ala/c.656T>C	uppS	EFF=missense_variant(MODERATE|MISSENSE|gTt/gCt|p.Val219Ala/c.656T>C|253|uppS|protein_coding|CODING|ACT37865|1|1|WARNING_TRANSCRIPT_NO_START_CODON),upstream_gene_variant(MODIFIER||119||285|cdsA|protein_coding|CODING|ACT37866||1),upstream_gene_variant(MODIFIER||988||450|yaeL|protein_coding|CODING|ACT37867||1),upstream_gene_variant(MODIFIER||2370||810|yaeT|protein_coding|CODING|ACT37868||1),upstream…	426	203	COG0020	I	YES	197745	198506	+	T656C	-303.81	-306.48	1.47e-08	1.47e-08	76.52	75.67	0.4853	0.0001	523-592	0.9965	0.9998	562-659	0.992	0.999995	0.999883
201403	C	T	SNP	missense_variant	MODERATE	Cgt/Tgt	p.Arg212Cys/c.634C>T	yaeT	EFF=missense_variant(MODERATE|MISSENSE|Cgt/Tgt|p.Arg212Cys/c.634C>T|810|yaeT|protein_coding|CODING|ACT37868|1|1),upstream_gene_variant(MODIFIER||1921||161|hlpA|protein_coding|CODING|ACT37869||1|WARNING_TRANSCRIPT_NO_START_CODON),upstream_gene_variant(MODIFIER||2410||341|lpxD|protein_coding|CODING|ACT37870||1),upstream_gene_variant(MODIFIER||3540||151|fabZ|protein_coding|CODING|ACT37871||1),upstre…	453	233	COG4775	M	NO	200770	203202	+	C634T	-1019.69	-1017.78	3.73e-25	2.37e-25	512.26	494.9	0.5112	0.0485	576-813	0.5068	0.6521	571-620	0.3884	0.968452	0.96699
203883	T	C	SNP	missense_variant	MODERATE	gTc/gCc	p.Val24Ala/c.71T>C	lpxD	EFF=missense_variant(MODERATE|MISSENSE|gTc/gCc|p.Val24Ala/c.71T>C|341|lpxD|protein_coding|CODING|ACT37870|1|1),upstream_gene_variant(MODIFIER||1060||151|fabZ|protein_coding|CODING|ACT37871||1),upstream_gene_variant(MODIFIER||1519||262|lpxA|protein_coding|CODING|ACT37872||1|WARNING_TRANSCRIPT_NO_START_CODON),upstream_gene_variant(MODIFIER||2307||382|lpxB|protein_coding|CODING|ACT37873||1),upstream…	1286	314	COG1044	M	YES	203813	204838	+	T71C	-445.47	-448.35	6.58e-10	6.56e-10	83.84	83.84	0.5129	0	34-83	1	1	3-255	0.9999	1	1
205155	A	G	SNP	synonymous_variant	LOW	gcA/gcG	p.Ala71Ala/c.213A>G	fabZ	EFF=synonymous_variant(LOW|SILENT|gcA/gcG|p.Ala71Ala/c.213A>G|151|fabZ|protein_coding|CODING|ACT37871|1|1),upstream_gene_variant(MODIFIER||247||262|lpxA|protein_coding|CODING|ACT37872||1|WARNING_TRANSCRIPT_NO_START_CODON),upstream_gene_variant(MODIFIER||1035||382|lpxB|protein_coding|CODING|ACT37873||1),upstream_gene_variant(MODIFIER||2180||198|rnhB|protein_coding|CODING|ACT37874||1),upstream_gene…	5028	1254	COG0764	I	YES	204943	205398	+	A213G	-173.23	-173.39	2.72e-06	1.02e-06	128.49	119.26	0.5012	0.0035	213-324	0.9276	0.9692	260-320	0.8418	0.989072	0.981295
206299	G	A	SNP	missense_variant	MODERATE	cGc/cAc	p.Arg37His/c.110G>A	lpxB	EFF=missense_variant(MODERATE|MISSENSE|cGc/cAc|p.Arg37His/c.110G>A|382|lpxB|protein_coding|CODING|ACT37873|1|1),upstream_gene_variant(MODIFIER||1036||198|rnhB|protein_coding|CODING|ACT37874||1),upstream_gene_variant(MODIFIER||1669||1160|dnaE|protein_coding|CODING|ACT37875||1),downstream_gene_variant(MODIFIER||3097||810|yaeT|protein_coding|CODING|ACT37868||1),downstream_gene_variant(MODIFIER||2490…	422	121	COG0763	M	YES	206190	207338	+	G110A	-516.61	-512.29	9.12e-14	7.09e-14	121.96	135.37	0.5387	0.0013	93-240	0.9677	0.9958	94-161	0.9483	0.924655	0.782901
214151	C	T	SNP	missense_variant	MODERATE	aCc/aTc	p.Thr544Ile/c.1631C>T	ldcC	EFF=missense_variant(MODERATE|MISSENSE|aCc/aTc|p.Thr544Ile/c.1631C>T|713|ldcC|protein_coding|CODING|ACT37877|1|1),upstream_gene_variant(MODIFIER||568||129|yaeR|protein_coding|CODING|ACT37878||1),upstream_gene_variant(MODIFIER||1022||432|tilS|protein_coding|CODING|ACT37879||1),upstream_gene_variant(MODIFIER||2982||181|yaeQ|protein_coding|CODING|ACT37882||1),upstream_gene_variant(MODIFIER||3524||14…	14	74	COG1982	E	NO	212521	214662	+	C1631T	-857.78	-856.07	1.42e-23	4.35e-23	337.6	354.27	0.4838	0.099	1605-1654	0.2284	0.5795	1627-1693	0.2964	0.951308	0.837788
215617	A	G	SNP	missense_variant	MODERATE	Aca/Gca	p.Thr149Ala/c.445A>G	tilS	EFF=missense_variant(MODERATE|MISSENSE|Aca/Gca|p.Thr149Ala/c.445A>G|432|tilS|protein_coding|CODING|ACT37879|1|1),upstream_gene_variant(MODIFIER||1516||181|yaeQ|protein_coding|CODING|ACT37882||1),upstream_gene_variant(MODIFIER||2058||140|yaeJ|protein_coding|CODING|ACT37883||1),upstream_gene_variant(MODIFIER||2494||236|cutF|protein_coding|CODING|ACT37884||1),downstream_gene_variant(MODIFIER||4167||…	31	24	COG0037	D	YES	215173	216471	+	A445G-A718G	-626.03	-626.92	1.54e-13	2.02e-13	390.45	359.59	0.5979	0.2469	598-744	0.07	-0.1085	641-694	0.0554	0.953018	0.730633
215890	A	G	SNP	missense_variant	MODERATE	Acg/Gcg	p.Thr240Ala/c.718A>G	tilS	EFF=missense_variant(MODERATE|MISSENSE|Acg/Gcg|p.Thr240Ala/c.718A>G|432|tilS|protein_coding|CODING|ACT37879|1|1),upstream_gene_variant(MODIFIER||1243||181|yaeQ|protein_coding|CODING|ACT37882||1),upstream_gene_variant(MODIFIER||1785||140|yaeJ|protein_coding|CODING|ACT37883||1),upstream_gene_variant(MODIFIER||2221||236|cutF|protein_coding|CODING|ACT37884||1),downstream_gene_variant(MODIFIER||4440||…	31	24	COG0037	D	YES	215173	216471	+	A445G-A718G	-626.03	-626.92	1.54e-13	2.02e-13	390.45	359.59	0.5979	0.2469	598-744	0.07	-0.1085	641-694	0.0554	0.953018	0.730633
216497	A	G	SNP	upstream_gene_variant	MODIFIER	.	.	.	EFF=upstream_gene_variant(MODIFIER||636||181|yaeQ|protein_coding|CODING|ACT37882||1),upstream_gene_variant(MODIFIER||1178||140|yaeJ|protein_coding|CODING|ACT37883||1),upstream_gene_variant(MODIFIER||1614||236|cutF|protein_coding|CODING|ACT37884||1),downstream_gene_variant(MODIFIER||23||84|rof|protein_coding|CODING|ACT37880||1),downstream_gene_variant(MODIFIER||270||66|yaeP|protein_coding|CODING|A…	.	.	NA	NA	.	.	.	.	.	.	.	.	.	.	.	.	.	.	.	.	.	.	.	.
219608	A	G	SNP	missense_variant	MODERATE	Tca/Cca	p.Ser80Pro/c.238T>C	yaeF	EFF=missense_variant(MODERATE|MISSENSE|Tca/Cca|p.Ser80Pro/c.238T>C|274|yaeF|protein_coding|CODING|ACT37885|1|1),upstream_gene_variant(MODIFIER||2834||84|rof|protein_coding|CODING|ACT37880||1),upstream_gene_variant(MODIFIER||2641||66|yaeP|protein_coding|CODING|ACT37881||1|WARNING_TRANSCRIPT_NO_START_CODON),downstream_gene_variant(MODIFIER||4946||713|ldcC|protein_coding|CODING|ACT37877||1),downstre…	5	62	COG0791	M	NO	219021	219845	-	T238C	-306.49	-306.86	3.12e-09	1.5e-09	112.4	112.72	0.4913	0.0687	216-265	0.3362	0.5033	222-271	0.2458	0.971741	0.963778
226319	G	A	SNP	upstream_gene_variant	MODIFIER	.	.	.	EFF=upstream_gene_variant(MODIFIER||290|||rrsH|rRNA|NON_CODING|ECB_r00001||1),upstream_gene_variant(MODIFIER||4703||572|proS|protein_coding|CODING|ACT37886||1),upstream_gene_variant(MODIFIER||3885||235|yaeB|protein_coding|CODING|ACT37887||1),upstream_gene_variant(MODIFIER||3484||134|rcsF|protein_coding|CODING|ACT37888||1),upstream_gene_variant(MODIFIER||1900|||ileV|tRNA|NON_CODING|ECB_t00001||1),…	.	.	NA	NA	.	.	.	.	.	.	.	.	.	.	.	.	.	.	.	.	.	.	.	.
233538	T	C	SNP	missense_variant	MODERATE	Aca/Gca	p.Thr90Ala/c.268A>G	yafC	EFF=missense_variant(MODERATE|MISSENSE|Aca/Gca|p.Thr90Ala/c.268A>G|304|yafC|protein_coding|CODING|ACT37894|1|1),upstream_gene_variant(MODIFIER||508||266|yafD|protein_coding|CODING|ACT37895||1|WARNING_TRANSCRIPT_NO_START_CODON),upstream_gene_variant(MODIFIER||1312||207|yafE|protein_coding|CODING|ACT37896||1),upstream_gene_variant(MODIFIER||4202||240|yafS|protein_coding|CODING|ACT37899||1),downstre…	23	38	COG0583	K	NO	232891	233805	-	A268G	-350.97	-350.97	1.62e-09	1.19e-09	158.17	168.78	0.5037	0.0222	265-314	0.7024	0.912	264-313	0.7083	0.99393	0.98673
235475	T	TA	INS	upstream_gene_variant	MODIFIER	.	.	.	EFF=upstream_gene_variant(MODIFIER||2264||240|yafS|protein_coding|CODING|ACT37899||1),upstream_gene_variant(MODIFIER||1671||304|yafC|protein_coding|CODING|ACT37894||1),upstream_gene_variant(MODIFIER||3515||243|dnaQ|protein_coding|CODING|ACT37901||1),upstream_gene_variant(MODIFIER||4379|||aspV|tRNA|NON_CODING|ECB_t00004||1),upstream_gene_variant(MODIFIER||4785||261|yafT|protein_coding|CODING|ACT37…	.	.	NA	NA	.	.	.	.	.	.	.	.	.	.	.	.	.	.	.	.	.	.	.	.
236932	C	T	SNP	upstream_gene_variant	MODIFIER	.	.	.	EFF=upstream_gene_variant(MODIFIER||808||240|yafS|protein_coding|CODING|ACT37899||1),upstream_gene_variant(MODIFIER||3127||304|yafC|protein_coding|CODING|ACT37894||1),upstream_gene_variant(MODIFIER||2059||243|dnaQ|protein_coding|CODING|ACT37901||1),upstream_gene_variant(MODIFIER||2923|||aspV|tRNA|NON_CODING|ECB_t00004||1),upstream_gene_variant(MODIFIER||3329||261|yafT|protein_coding|CODING|ACT379…	.	.	NA	NA	.	.	.	.	.	.	.	.	.	.	.	.	.	.	.	.	.	.	.	.
242196	AGG	A	DEL	frameshift_variant	HIGH	ggg/	p.Gly63fs/c.187_188delGG	ECB_00212	EFF=frameshift_variant(HIGH||ggg/|p.Gly63fs/c.187_188delGG|123|ECB_00212|protein_coding|CODING|ACT37905|1|1),upstream_gene_variant(MODIFIER||4491||251|gloB|protein_coding|CODING|ACT37898||1),upstream_gene_variant(MODIFIER||616||378|yhhI-1|protein_coding|CODING|ACT37906||1),upstream_gene_variant(MODIFIER||3271||155|rnhA|protein_coding|CODING|ACT37900||1),upstream_gene_variant(MODIFIER||2717||157|y…	NA	NA	NA	NA	NO	.	.	.	.	.	.	.	.	.	.	.	.	.	.	.	.	.	.	.
243531	T	C	SNP	missense_variant	MODERATE	gTt/gCt	p.Val240Ala/c.719T>C	yhhI-1	EFF=missense_variant(MODERATE|MISSENSE|gTt/gCt|p.Val240Ala/c.719T>C|378|yhhI-1|protein_coding|CODING|ACT37906|1|1),upstream_gene_variant(MODIFIER||4605||155|rnhA|protein_coding|CODING|ACT37900||1),upstream_gene_variant(MODIFIER||1383||157|ykfE|protein_coding|CODING|ACT37908||1),upstream_gene_variant(MODIFIER||4583||192|lpcA|protein_coding|CODING|ACT37910||1),downstream_gene_variant(MODIFIER||459|…	NA	NA	NA	NA	NO	242813	243949	+	T719C-C942T	-351.56	-351.56	3.84e-13	5.82e-13	267.34	320.11	0.4313	0.1079	931-980	0.2048	0.4864	926-975	0.2356	0.953917	0.903615
243754	C	T	SNP	synonymous_variant	LOW	gaC/gaT	p.Asp314Asp/c.942C>T	yhhI-1	EFF=synonymous_variant(LOW|SILENT|gaC/gaT|p.Asp314Asp/c.942C>T|378|yhhI-1|protein_coding|CODING|ACT37906|1|1),upstream_gene_variant(MODIFIER||4828||155|rnhA|protein_coding|CODING|ACT37900||1),upstream_gene_variant(MODIFIER||1160||157|ykfE|protein_coding|CODING|ACT37908||1),upstream_gene_variant(MODIFIER||4360||192|lpcA|protein_coding|CODING|ACT37910||1),downstream_gene_variant(MODIFIER||236||256|…	NA	NA	NA	NA	NO	242813	243949	+	T719C-C942T	-351.56	-351.56	3.84e-13	5.82e-13	267.34	320.11	0.4313	0.1079	931-980	0.2048	0.4864	926-975	0.2356	0.953917	0.903615
244951	C	T	SNP	missense_variant	MODERATE	gCa/gTa	p.Ala13Val/c.38C>T	ykfE	EFF=missense_variant(MODERATE|MISSENSE|gCa/gTa|p.Ala13Val/c.38C>T|157|ykfE|protein_coding|CODING|ACT37908|1|1),upstream_gene_variant(MODIFIER||3163||192|lpcA|protein_coding|CODING|ACT37910||1),upstream_gene_variant(MODIFIER||3947||255|yafJ|protein_coding|CODING|ACT37911||1),upstream_gene_variant(MODIFIER||191||256|yafV|protein_coding|CODING|ACT37907||1|WARNING_TRANSCRIPT_NO_START_CODON),downstrea…	59	197	NA	NA	NO	244914	245387	+	C38T	-169.21	-167.15	2.55e-05	6.82e-06	167.65	179.32	0.5084	0.0072	19-151	0.8678	0.9557	18-141	0.7927	0.972416	0.958135
246183	G	A	SNP	synonymous_variant	LOW	agC/agT	p.Ser564Ser/c.1692C>T	fadE	EFF=synonymous_variant(LOW|SILENT|agC/agT|p.Ser564Ser/c.1692C>T|814|fadE|protein_coding|CODING|ACT37909|1|1),upstream_gene_variant(MODIFIER||1931||192|lpcA|protein_coding|CODING|ACT37910||1),upstream_gene_variant(MODIFIER||2715||255|yafJ|protein_coding|CODING|ACT37911||1),upstream_gene_variant(MODIFIER||1423||256|yafV|protein_coding|CODING|ACT37907||1|WARNING_TRANSCRIPT_NO_START_CODON),downstream…	2	52	COG1960	I	NO	245430	247874	-	C1692T	-1115.73	-1117.87	2.39e-24	8.61e-24	356	346.93	0.5686	0.0624	1656-1752	0.4322	0.765	1667-1716	0.4983	0.920033	0.840902
250990	C	T	SNP	synonymous_variant	LOW	ctG/ctA	p.Leu28Leu/c.84G>A	dinJ	EFF=synonymous_variant(LOW|SILENT|ctG/ctA|p.Leu28Leu/c.84G>A|86|dinJ|protein_coding|CODING|ACT37914|1|1),upstream_gene_variant(MODIFIER||293||249|yafL|protein_coding|CODING|ACT37915||1),upstream_gene_variant(MODIFIER||1218||165|yafM|protein_coding|CODING|ACT37916||1),upstream_gene_variant(MODIFIER||3116||814|fadE|protein_coding|CODING|ACT37909||1),upstream_gene_variant(MODIFIER||614||246|yafK|pro…	187	345	COG3077	L	NO	250813	251073	-	G84A	-80.42	-80.42	0.000644348	0.000643593	87.83	88.07	0.4674	0	13-132	0.9999	1	7-116	0.999	0.999998	0.999972
255649	C	T	SNP	synonymous_variant	LOW	ctC/ctT	p.Leu63Leu/c.189C>T	dinB	EFF=synonymous_variant(LOW|SILENT|ctC/ctT|p.Leu63Leu/c.189C>T|351|dinB|protein_coding|CODING|ACT37917|1|1),upstream_gene_variant(MODIFIER||4839||92|yafQ|protein_coding|CODING|ACT37913||1),upstream_gene_variant(MODIFIER||4576||86|dinJ|protein_coding|CODING|ACT37914||1),upstream_gene_variant(MODIFIER||919||97|yafN|protein_coding|CODING|ACT37918||1),upstream_gene_variant(MODIFIER||1215||132|yafO|pro…	10	23	COG0389	L	NO	255461	256516	+	C189T	-440.05	-440.85	1.14e-10	1.82e-10	244.33	243.18	0.5527	0.0005	150-199	0.9845	0.9978	150-199	0.9651	0.999837	0.999252
259161	A	G	SNP	synonymous_variant	LOW	ggT/ggC	p.Gly349Gly/c.1047T>C	pepD	EFF=synonymous_variant(LOW|SILENT|ggT/ggC|p.Gly349Gly/c.1047T>C|485|pepD|protein_coding|CODING|ACT37923|1|1|WARNING_TRANSCRIPT_NO_START_CODON),upstream_gene_variant(MODIFIER||1307||152|gpt|protein_coding|CODING|ACT37924||1),upstream_gene_variant(MODIFIER||1857||414|yafA|protein_coding|CODING|ACT37925||1),upstream_gene_variant(MODIFIER||3159||133|crl|protein_coding|CODING|ACT37926||1),upstream_gen…	618	294	COG2195	E	NO	258750	260207	-	T1047C	-567.59	-567.46	1.95e-15	1.12e-15	392.8	323.03	0.5187	0.0924	996-1065	0.3114	0.5368	1004-1059	0.3013	0.985588	0.949336
261109	C	T	SNP	missense_variant	MODERATE	gCa/gTa	p.Ala31Val/c.92C>T	yafA	EFF=missense_variant(MODERATE|MISSENSE|gCa/gTa|p.Ala31Val/c.92C>T|414|yafA|protein_coding|CODING|ACT37925|1|1),upstream_gene_variant(MODIFIER||1211||133|crl|protein_coding|CODING|ACT37926||1),upstream_gene_variant(MODIFIER||1738||91|insA-3|protein_coding|CODING|ACT37927||1|WARNING_TRANSCRIPT_NO_START_CODON),upstream_gene_variant(MODIFIER||1932||167|insB-3|protein_coding|CODING|ACT37928||1),upstre…	72	68	COG1073	R	NO	261018	262262	+	C92T	-510.55	-510.87	2.58e-12	3.73e-12	382.04	374.04	0.5205	0.0982	67-116	0.2962	0.4908	71-120	0.2688	0.999062	0.989643
265732	A	G	SNP	missense_variant	MODERATE	Act/Gct	p.Thr285Ala/c.853A>G	proB	EFF=missense_variant(MODERATE|MISSENSE|Act/Gct|p.Thr285Ala/c.853A>G|367|proB|protein_coding|CODING|ACT37930|1|1),upstream_gene_variant(MODIFIER||263||417|proA|protein_coding|CODING|ACT37931||1),upstream_gene_variant(MODIFIER||1631|||thrW|tRNA|NON_CODING|ECB_t00005||1),upstream_gene_variant(MODIFIER||1140||345|phoE|protein_coding|CODING|ACT37929||1),downstream_gene_variant(MODIFIER||4806||152|gpt|…	137	92	COG0263	E	NO	264880	265983	+	A853G	-488.24	-494.55	1.83e-13	4.26e-13	342.24	260.35	0.5736	0.0839	846-895	0.3411	0.7645	847-918	0.4977	0.657865	0.595708
268501	A	G	SNP	missense_variant	MODERATE	cTg/cCg	p.Leu137Pro/c.410T>C	yagQ	EFF=missense_variant(MODERATE|MISSENSE|cTg/cCg|p.Leu137Pro/c.410T>C|318|yagQ|protein_coding|CODING|ACT37933|1|1),upstream_gene_variant(MODIFIER||3909||345|phoE|protein_coding|CODING|ACT37929||1),upstream_gene_variant(MODIFIER||526||136|yagP|protein_coding|CODING|ACT37932||1),upstream_gene_variant(MODIFIER||4673||204|yagU|protein_coding|CODING|ACT37937||1),downstream_gene_variant(MODIFIER||4957||1…	1	21	NA	NA	NO	267954	268910	-	G258A-T410C	-462.19	-460.56	1.12e-09	3.38e-10	203.26	132.96	0.6239	0.0433	255-337	0.5689	0.8809	255-337	0.6502	0.965375	0.95661
268653	C	T	SNP	synonymous_variant	LOW	gcG/gcA	p.Ala86Ala/c.258G>A	yagQ	EFF=synonymous_variant(LOW|SILENT|gcG/gcA|p.Ala86Ala/c.258G>A|318|yagQ|protein_coding|CODING|ACT37933|1|1),upstream_gene_variant(MODIFIER||4061||345|phoE|protein_coding|CODING|ACT37929||1),upstream_gene_variant(MODIFIER||678||136|yagP|protein_coding|CODING|ACT37932||1),upstream_gene_variant(MODIFIER||4521||204|yagU|protein_coding|CODING|ACT37937||1),downstream_gene_variant(MODIFIER||267||732|yagR…	1	21	NA	NA	NO	267954	268910	-	G258A-T410C	-462.19	-460.56	1.12e-09	3.38e-10	203.26	132.96	0.6239	0.0433	255-337	0.5689	0.8809	255-337	0.6502	0.965375	0.95661
269595	T	C	SNP	synonymous_variant	LOW	ggA/ggG	p.Gly508Gly/c.1524A>G	yagR	EFF=synonymous_variant(LOW|SILENT|ggA/ggG|p.Gly508Gly/c.1524A>G|732|yagR|protein_coding|CODING|ACT37934|1|1),upstream_gene_variant(MODIFIER||1620||136|yagP|protein_coding|CODING|ACT37932||1),upstream_gene_variant(MODIFIER||3579||204|yagU|protein_coding|CODING|ACT37937||1),upstream_gene_variant(MODIFIER||685||318|yagQ|protein_coding|CODING|ACT37933||1),downstream_gene_variant(MODIFIER||3612||367|p…	1	21	NA	NA	NO	268920	271118	-	A1524G	-1007.97	-1011.48	6.54e-23	3.34e-22	379.86	458.19	0.5885	0.2091	1528-1581	0.0989	-0.0663	1531-1603	0.0635	0.992814	0.963176
275981	T	C	SNP	missense_variant	MODERATE	aAc/aGc	p.Asn340Ser/c.1019A>G	yagW	EFF=missense_variant(MODERATE|MISSENSE|aAc/aGc|p.Asn340Ser/c.1019A>G|547|yagW|protein_coding|CODING|ACT37940|1|1),upstream_gene_variant(MODIFIER||4863||732|yagR|protein_coding|CODING|ACT37934||1),upstream_gene_variant(MODIFIER||3910||318|yagS|protein_coding|CODING|ACT37935||1),upstream_gene_variant(MODIFIER||3224||229|yagT|protein_coding|CODING|ACT37936||1),upstream_gene_variant(MODIFIER||1617||1…	4	42	NA	NA	NO	275356	276999	-	G402A-A1019G	-628.23	-624.43	4.67e-17	7.11e-19	275.68	282.73	0.5029	0.2778	397-452	0.0531	0.0618	395-452	0.0933	0.877281	0.785713
276598	C	T	SNP	synonymous_variant	LOW	ccG/ccA	p.Pro134Pro/c.402G>A	yagW	EFF=synonymous_variant(LOW|SILENT|ccG/ccA|p.Pro134Pro/c.402G>A|547|yagW|protein_coding|CODING|ACT37940|1|1),upstream_gene_variant(MODIFIER||4527||318|yagS|protein_coding|CODING|ACT37935||1),upstream_gene_variant(MODIFIER||3841||229|yagT|protein_coding|CODING|ACT37936||1),upstream_gene_variant(MODIFIER||2234||109|ykgJ|protein_coding|CODING|ACT37938||1),upstream_gene_variant(MODIFIER||1211||236|yag…	4	42	NA	NA	NO	275356	276999	-	G402A-A1019G	-628.23	-624.43	4.67e-17	7.11e-19	275.68	282.73	0.5029	0.2778	397-452	0.0531	0.0618	395-452	0.0933	0.877281	0.785713
278229	G	GCC	INS	frameshift_variant	HIGH	gcg/gGGcg	p.Ala429_Ile430fs/c.1285_1286insGG	yagX	EFF=frameshift_variant(HIGH||gcg/gGGcg|p.Ala429_Ile430fs/c.1285_1286insGG|841|yagX|protein_coding|CODING|ACT37941|1|1),upstream_gene_variant(MODIFIER||3866||109|ykgJ|protein_coding|CODING|ACT37938||1),upstream_gene_variant(MODIFIER||2843||236|yagV|protein_coding|CODING|ACT37939||1),upstream_gene_variant(MODIFIER||1231||547|yagW|protein_coding|CODING|ACT37940||1),upstream_gene_variant(MODIFIER||40…	1	19	NA	NA	NO	.	.	.	.	.	.	.	.	.	.	.	.	.	.	.	.	.	.	.
279685	C	T	SNP	missense_variant	MODERATE	tGc/tAc	p.Cys175Tyr/c.524G>A	yagY	EFF=missense_variant(MODERATE|MISSENSE|tGc/tAc|p.Cys175Tyr/c.524G>A|222|yagY|protein_coding|CODING|ACT37942|1|1),upstream_gene_variant(MODIFIER||4298||236|yagV|protein_coding|CODING|ACT37939||1),upstream_gene_variant(MODIFIER||2686||547|yagW|protein_coding|CODING|ACT37940||1),upstream_gene_variant(MODIFIER||2607||75|ykgL|protein_coding|CODING|ACT37945||1),upstream_gene_variant(MODIFIER||171||841|…	0	25	NA	NA	NO	279540	280208	-	G524A	-246.55	-245.01	5.46e-07	5.05e-08	161.87	118.11	0.5723	0.1044	403-664	0.2705	0.4451	501-574	0.2365	0.844641	0.852647
281005	A	G	SNP	synonymous_variant	LOW	tgT/tgC	p.Cys171Cys/c.513T>C	ykgK	EFF=synonymous_variant(LOW|SILENT|tgT/tgC|p.Cys171Cys/c.513T>C|196|ykgK|protein_coding|CODING|ACT37944|1|1|WARNING_TRANSCRIPT_NO_START_CODON),upstream_gene_variant(MODIFIER||4006||547|yagW|protein_coding|CODING|ACT37940||1),upstream_gene_variant(MODIFIER||1287||75|ykgL|protein_coding|CODING|ACT37945||1),upstream_gene_variant(MODIFIER||1491||841|yagX|protein_coding|CODING|ACT37941||1),upstream_gen…	2	30	COG2771	K	NO	280927	281517	-	T513C	-178.65	-182.51	2.74e-06	9.32e-06	149.12	89.3	0.405	0.0269	479-529	0.6343	0.7674	473-530	0.4898	0.933394	0.855147
282480	T	C	SNP	synonymous_variant	LOW	ggT/ggC	p.Gly63Gly/c.189T>C	ykgL	EFF=synonymous_variant(LOW|SILENT|ggT/ggC|p.Gly63Gly/c.189T>C|75|ykgL|protein_coding|CODING|ACT37945|1|1),upstream_gene_variant(MODIFIER||2966||841|yagX|protein_coding|CODING|ACT37941||1),upstream_gene_variant(MODIFIER||2057||1418|eaeH|protein_coding|CODING|ACT37947||1),upstream_gene_variant(MODIFIER||2272||222|yagY|protein_coding|CODING|ACT37942||1),upstream_gene_variant(MODIFIER||1579||211|yagZ…	8	20	NA	NA	NO	282292	282519	+	T189C	-75.46	-71.28	0.014645	0.0139889	35.42	36.03	0.4386	0.0204	171-220	0.6746	0.8892	171-220	0.6478	0.970834	0.995868
284324	T	TC	INS	upstream_gene_variant	MODIFIER	.	.	.	EFF=upstream_gene_variant(MODIFIER||4811||841|yagX|protein_coding|CODING|ACT37941||1),upstream_gene_variant(MODIFIER||212||1418|eaeH|protein_coding|CODING|ACT37947||1),upstream_gene_variant(MODIFIER||4117||222|yagY|protein_coding|CODING|ACT37942||1),upstream_gene_variant(MODIFIER||3424||211|yagZ|protein_coding|CODING|ACT37943||1),upstream_gene_variant(MODIFIER||2808||196|ykgK|protein_coding|CODIN…	.	.	NA	NA	.	.	.	.	.	.	.	.	.	.	.	.	.	.	.	.	.	.	.	.
288694	C	T	SNP	synonymous_variant	LOW	ttC/ttT	p.Phe1386Phe/c.4158C>T	eaeH	EFF=synonymous_variant(LOW|SILENT|ttC/ttT|p.Phe1386Phe/c.4158C>T|1418|eaeH|protein_coding|CODING|ACT37947|1|1),upstream_gene_variant(MODIFIER||4182||284|ykgD|protein_coding|CODING|ACT37952||1),downstream_gene_variant(MODIFIER||239||283|ykgA|protein_coding|CODING|ACT37948||1),downstream_gene_variant(MODIFIER||1681||197|ykgB|protein_coding|CODING|ACT37949||1),downstream_gene_variant(MODIFIER||2286|…	NA	NA	NA	NA	NO	284537	288793	+	C4158T	-1780.51	-1780.29	4e-42	3.74e-42	665.11	665.59	0.5067	0.0001	4128-4177	0.9975	0.9997	4124-4173	0.9934	0.999974	0.999768
289518	G	A	SNP	synonymous_variant	LOW	agC/agT	p.Ser89Ser/c.267C>T	ykgA	EFF=synonymous_variant(LOW|SILENT|agC/agT|p.Ser89Ser/c.267C>T|283|ykgA|protein_coding|CODING|ACT37948|1|1),upstream_gene_variant(MODIFIER||3358||284|ykgD|protein_coding|CODING|ACT37952||1),upstream_gene_variant(MODIFIER||4739||239|ykgE|protein_coding|CODING|ACT37953||1|WARNING_TRANSCRIPT_NO_START_CODON),downstream_gene_variant(MODIFIER||857||197|ykgB|protein_coding|CODING|ACT37949||1),downstream_…	NA	NA	COG2207	K	NO	288933	289784	-	C267T	-267.56	-264.68	2.35e-09	1.06e-09	191.31	224.65	0.4289	0.1726	246-295	0.0963	0.32	264-329	0.1533	0.962861	0.923281
290333	C	T	SNP	upstream_gene_variant	MODIFIER	.	.	.	EFF=upstream_gene_variant(MODIFIER||2543||284|ykgD|protein_coding|CODING|ACT37952||1),upstream_gene_variant(MODIFIER||3924||239|ykgE|protein_coding|CODING|ACT37953||1|WARNING_TRANSCRIPT_NO_START_CODON),upstream_gene_variant(MODIFIER||549||283|ykgA|protein_coding|CODING|ACT37948||1),upstream_gene_variant(MODIFIER||4654||475|ykgF|protein_coding|CODING|ACT37954||1),downstream_gene_variant(MODIFIER||…	.	.	NA	NA	.	.	.	.	.	.	.	.	.	.	.	.	.	.	.	.	.	.	.	.
292387	A	G	SNP	synonymous_variant	LOW	gaT/gaC	p.Asp88Asp/c.264T>C	ykgC	EFF=synonymous_variant(LOW|SILENT|gaT/gaC|p.Asp88Asp/c.264T>C|441|ykgC|protein_coding|CODING|ACT37951|1|1),upstream_gene_variant(MODIFIER||489||284|ykgD|protein_coding|CODING|ACT37952||1),upstream_gene_variant(MODIFIER||1870||239|ykgE|protein_coding|CODING|ACT37953||1|WARNING_TRANSCRIPT_NO_START_CODON),upstream_gene_variant(MODIFIER||2603||283|ykgA|protein_coding|CODING|ACT37948||1),upstream_gene…	2	44	COG1249	C	NO	291325	292650	-	T264C	-481.39	-478.76	2.25e-13	3.63e-14	247.55	268.48	0.4414	0.0623	254-319	0.3658	0.5077	254-319	0.2485	0.980976	0.982734
294679	C	T	SNP	synonymous_variant	LOW	gcC/gcT	p.Ala141Ala/c.423C>T	ykgE	EFF=synonymous_variant(LOW|SILENT|gcC/gcT|p.Ala141Ala/c.423C>T|239|ykgE|protein_coding|CODING|ACT37953|1|1|WARNING_TRANSCRIPT_NO_START_CODON),upstream_gene_variant(MODIFIER||4895||283|ykgA|protein_coding|CODING|ACT37948||1),upstream_gene_variant(MODIFIER||308||475|ykgF|protein_coding|CODING|ACT37954||1),upstream_gene_variant(MODIFIER||3711||197|ykgB|protein_coding|CODING|ACT37949||1),upstream_gen…	5	48	COG0247	C	NO	294257	294976	+	C423T	-272.87	-271.58	3.49e-09	2.56e-10	190.47	169.4	0.5237	0.1372	373-504	0.197	0.1273	373-436	0.1119	0.903369	0.915698
295780	C	T	SNP	missense_variant	MODERATE	gCa/gTa	p.Ala265Val/c.794C>T	ykgF	EFF=missense_variant(MODERATE|MISSENSE|gCa/gTa|p.Ala265Val/c.794C>T|475|ykgF|protein_coding|CODING|ACT37954|1|1),upstream_gene_variant(MODIFIER||4812||197|ykgB|protein_coding|CODING|ACT37949||1),upstream_gene_variant(MODIFIER||4564||78|ykgI|protein_coding|CODING|ACT37950||1),upstream_gene_variant(MODIFIER||627||231|ykgG|protein_coding|CODING|ACT37955||1),upstream_gene_variant(MODIFIER||3130||441|…	3	34	COG1139	C	NO	294987	296414	+	C794T	-563.39	-561.28	7.61e-15	3.82e-16	369.03	471.63	0.5362	0.0023	753-811	0.948	0.9877	793-858	0.9083	0.959845	0.924993
297263	C	T	SNP	missense_variant	MODERATE	Gcc/Acc	p.Ala3Thr/c.7G>A	ECB_00265	EFF=missense_variant(MODERATE|MISSENSE|Gcc/Acc|p.Ala3Thr/c.7G>A|70|ECB_00265|protein_coding|CODING|ACT37956|1|1),upstream_gene_variant(MODIFIER||4613||441|ykgC|protein_coding|CODING|ACT37951||1),upstream_gene_variant(MODIFIER||4849||677|betT|protein_coding|CODING|ACT37961||1),downstream_gene_variant(MODIFIER||82||222|ykgH|protein_coding|CODING|ACT37957||1),downstream_gene_variant(MODIFIER||963||5…	NA	NA	NA	NA	NO	297057	297269	-	G7A	-66.01	-63.4	0.0026565	0.00187492	31.08	45.41	0.4251	0.0632	70-148	0.264	0.6723	79-145	0.2707	0.919411	0.84496
298862	T	C	SNP	synonymous_variant	LOW	gcA/gcG	p.Ala345Ala/c.1035A>G	betA	EFF=synonymous_variant(LOW|SILENT|gcA/gcG|p.Ala345Ala/c.1035A>G|556|betA|protein_coding|CODING|ACT37958|1|1),upstream_gene_variant(MODIFIER||3250||677|betT|protein_coding|CODING|ACT37961||1),upstream_gene_variant(MODIFIER||1593||70|ECB_00265|protein_coding|CODING|ACT37956||1),upstream_gene_variant(MODIFIER||849||222|ykgH|protein_coding|CODING|ACT37957||1),downstream_gene_variant(MODIFIER||1048||4…	25	20	COG2303	E	NO	298226	299896	-	A1035G	-746.83	-752.11	5.34e-19	8.16e-19	432.7	429.52	0.5436	0.1114	983-1040	0.2556	0.1272	988-1037	0.1119	0.962855	0.971673
301012	T	C	SNP	missense_variant	MODERATE	gAa/gGa	p.Glu124Gly/c.371A>G	betB	EFF=missense_variant(MODERATE|MISSENSE|gAa/gGa|p.Glu124Gly/c.371A>G|490|betB|protein_coding|CODING|ACT37959|1|1),upstream_gene_variant(MODIFIER||1100||677|betT|protein_coding|CODING|ACT37961||1),upstream_gene_variant(MODIFIER||3743||70|ECB_00265|protein_coding|CODING|ACT37956||1),upstream_gene_variant(MODIFIER||2999||222|ykgH|protein_coding|CODING|ACT37957||1),upstream_gene_variant(MODIFIER||1116…	39	24	COG1012	C	NO	299910	301382	-	A371G	-671.98	-673.23	1.34e-16	4.03e-16	177.87	176.35	0.581	0.0071	332-381	0.8729	0.9817	334-383	0.8839	0.989534	0.921856
302161	T	C	SNP	missense_variant	MODERATE	gTg/gCg	p.Val17Ala/c.50T>C	betT	EFF=missense_variant(MODERATE|MISSENSE|gTg/gCg|p.Val17Ala/c.50T>C|677|betT|protein_coding|CODING|ACT37961|1|1),upstream_gene_variant(MODIFIER||4892||70|ECB_00265|protein_coding|CODING|ACT37956||1),upstream_gene_variant(MODIFIER||4148||222|ykgH|protein_coding|CODING|ACT37957||1),upstream_gene_variant(MODIFIER||2265||556|betA|protein_coding|CODING|ACT37958||1),upstream_gene_variant(MODIFIER||2859||…	41	53	COG1292	M	NO	302112	304145	+	T50C-C401T	-925.85	-925.62	4.34e-21	9.38e-21	549.83	546.24	0.5408	0.185	384-433	0.1269	0.3702	384-433	0.2032	0.908618	0.778689
302512	C	T	SNP	missense_variant	MODERATE	gCc/gTc	p.Ala134Val/c.401C>T	betT	EFF=missense_variant(MODERATE|MISSENSE|gCc/gTc|p.Ala134Val/c.401C>T|677|betT|protein_coding|CODING|ACT37961|1|1),upstream_gene_variant(MODIFIER||4499||222|ykgH|protein_coding|CODING|ACT37957||1),upstream_gene_variant(MODIFIER||2616||556|betA|protein_coding|CODING|ACT37958||1),upstream_gene_variant(MODIFIER||2508||362|yahA|protein_coding|CODING|ACT37962||1),upstream_gene_variant(MODIFIER||1130||49…	41	53	COG1292	M	NO	302112	304145	+	T50C-C401T	-925.85	-925.62	4.34e-21	9.38e-21	549.83	546.24	0.5408	0.185	384-433	0.1269	0.3702	384-433	0.2032	0.908618	0.778689
305267	A	G	SNP	missense_variant	MODERATE	tAc/tGc	p.Tyr83Cys/c.248A>G	yahA	EFF=missense_variant(MODERATE|MISSENSE|tAc/tGc|p.Tyr83Cys/c.248A>G|362|yahA|protein_coding|CODING|ACT37962|1|1),upstream_gene_variant(MODIFIER||3885||490|betB|protein_coding|CODING|ACT37959||1),upstream_gene_variant(MODIFIER||3284||195|betI|protein_coding|CODING|ACT37960||1),upstream_gene_variant(MODIFIER||2662||201|yahD|protein_coding|CODING|ACT37965||1),upstream_gene_variant(MODIFIER||3307||287…	46	29	COG2771	K	NO	305020	306108	+	A248G	-411.73	-411.65	1.77e-11	1.06e-11	212.21	214.06	0.4638	0	224-273	0.9991	0.9999	225-274	0.9955	0.996843	0.991074
306253	T	C	SNP	missense_variant	MODERATE	cAg/cGg	p.Gln277Arg/c.830A>G	yahB	EFF=missense_variant(MODERATE|MISSENSE|cAg/cGg|p.Gln277Arg/c.830A>G|310|yahB|protein_coding|CODING|ACT37963|1|1),upstream_gene_variant(MODIFIER||4871||490|betB|protein_coding|CODING|ACT37959||1),upstream_gene_variant(MODIFIER||4270||195|betI|protein_coding|CODING|ACT37960||1),upstream_gene_variant(MODIFIER||1676||201|yahD|protein_coding|CODING|ACT37965||1),upstream_gene_variant(MODIFIER||2321||28…	8	28	COG0583	K	NO	306150	307082	-	A830G	-348.11	-350.21	1.36e-12	2.15e-12	206.5	230.7	0.4803	0.0291	790-846	0.612	0.8078	793-847	0.5312	0.980657	0.99072
308193	C	T	SNP	stop_gained	HIGH	Cga/Tga	p.Arg89*/c.265C>T	yahD	EFF=stop_gained(HIGH|NONSENSE|Cga/Tga|p.Arg89*/c.265C>T|201|yahD|protein_coding|CODING|ACT37965|1|1),upstream_gene_variant(MODIFIER||381||287|yahE|protein_coding|CODING|ACT37966||1|WARNING_TRANSCRIPT_NO_START_CODON),upstream_gene_variant(MODIFIER||1234||515|yahF|protein_coding|CODING|ACT37967||1),upstream_gene_variant(MODIFIER||2781||472|yahG|protein_coding|CODING|ACT37968||1),upstream_gene_varia…	6	33	COG0666	R	NO	307929	308534	+	C265T	-206.17	-207.5	2.18e-07	1.43e-07	231.09	210.53	0.4339	0.0196	234-283	0.6799	0.9102	233-284	0.682	0.993215	0.986918
309536	C	T	SNP	missense_variant	MODERATE	gCg/gTg	p.Ala37Val/c.110C>T	yahF	EFF=missense_variant(MODERATE|MISSENSE|gCg/gTg|p.Ala37Val/c.110C>T|515|yahF|protein_coding|CODING|ACT37967|1|1),upstream_gene_variant(MODIFIER||1438||472|yahG|protein_coding|CODING|ACT37968||1),upstream_gene_variant(MODIFIER||2454||310|yahB|protein_coding|CODING|ACT37963||1),upstream_gene_variant(MODIFIER||1865||165|yahC|protein_coding|CODING|ACT37964||1),upstream_gene_variant(MODIFIER||3278||316…	0	32	COG0074	C	NO	309427	310974	+	C110T-T1526C	-671.87	-675.14	1.09e-15	1.96e-15	278.64	227.36	0.5543	0.103	1477-1535	0.2762	0.6303	1476-1535	0.3598	0.991478
310952	T	C	SNP	missense_variant	MODERATE	aTc/aCc	p.Ile509Thr/c.1526T>C	yahF	EFF=missense_variant(MODERATE|MISSENSE|aTc/aCc|p.Ile509Thr/c.1526T>C|515|yahF|protein_coding|CODING|ACT37967|1|1),upstream_gene_variant(MODIFIER||22||472|yahG|protein_coding|CODING|ACT37968||1),upstream_gene_variant(MODIFIER||3870||310|yahB|protein_coding|CODING|ACT37963||1),upstream_gene_variant(MODIFIER||3281||165|yahC|protein_coding|CODING|ACT37964||1),upstream_gene_variant(MODIFIER||1862||316…	0	32	COG0074	C	NO	309427	310974	+	C110T-T1526C	-671.87	-675.14	1.09e-15	1.96e-15	278.64	227.36	0.5543	0.103	1477-1535	0.2762	0.6303	1476-1535	0.3598	0.991478
312215	C	T	SNP	synonymous_variant	LOW	ggC/ggT	p.Gly414Gly/c.1242C>T	yahG	EFF=synonymous_variant(LOW|SILENT|ggC/ggT|p.Gly414Gly/c.1242C>T|472|yahG|protein_coding|CODING|ACT37968|1|1),upstream_gene_variant(MODIFIER||4544||165|yahC|protein_coding|CODING|ACT37964||1),upstream_gene_variant(MODIFIER||599||316|yahI|protein_coding|CODING|ACT37969||1),upstream_gene_variant(MODIFIER||1559||460|yahJ|protein_coding|CODING|ACT37970||1),upstream_gene_variant(MODIFIER||3318||349|yah…	0	8	NA	NA	NO	310974	312392	+	C1242T	-683.28	-683.28	1.51e-17	9.83e-18	192.11	179.18	0.5926	0.2472	1222-1335	0.0676	-0.0696	1236-1285	0.0601	0.878535	0.727777
314484	CG	C	DEL	frameshift_variant	HIGH	ggg/	p.Gly238fs/c.712delG	yahJ	EFF=frameshift_variant(HIGH||ggg/|p.Gly238fs/c.712delG|460|yahJ|protein_coding|CODING|ACT37970|1|1),upstream_gene_variant(MODIFIER||1048||349|yahK|protein_coding|CODING|ACT37971||1),upstream_gene_variant(MODIFIER||2341||271|yahL|protein_coding|CODING|ACT37972||1),upstream_gene_variant(MODIFIER||3569||81|yahM|protein_coding|CODING|ACT37973||1),upstream_gene_variant(MODIFIER||4649||91|yahO|protein_…	12	27	COG0402	FR	NO	.	.	.	.	.	.	.	.	.	.	.	.	.	.	.	.	.	.	.
314679	C	CA	INS	frameshift_variant	HIGH	aag/Aaag	p.Lys303_Leu304fs/c.907_908insA	yahJ	EFF=frameshift_variant(HIGH||aag/Aaag|p.Lys303_Leu304fs/c.907_908insA|460|yahJ|protein_coding|CODING|ACT37970|1|1),upstream_gene_variant(MODIFIER||853||349|yahK|protein_coding|CODING|ACT37971||1),upstream_gene_variant(MODIFIER||2146||271|yahL|protein_coding|CODING|ACT37972||1),upstream_gene_variant(MODIFIER||3374||81|yahM|protein_coding|CODING|ACT37973||1),upstream_gene_variant(MODIFIER||4454||91…	12	27	COG0402	FR	NO	.	.	.	.	.	.	.	.	.	.	.	.	.	.	.	.	.	.	.
318026	G	A	SNP	upstream_gene_variant	MODIFIER	.	.	.	EFF=upstream_gene_variant(MODIFIER||28||81|yahM|protein_coding|CODING|ACT37973||1),upstream_gene_variant(MODIFIER||1108||91|yahO|protein_coding|CODING|ACT37975||1),upstream_gene_variant(MODIFIER||3306||296|prpB|protein_coding|CODING|ACT37977||1),upstream_gene_variant(MODIFIER||4636||389|prpC|protein_coding|CODING|ACT37978||1),downstream_gene_variant(MODIFIER||290||223|yahN|protein_coding|CODING|A…	.	.	NA	NA	.	.	.	.	.	.	.	.	.	.	.	.	.	.	.	.	.	.	.	.
326134	C	T	SNP	missense_variant	MODERATE	gCg/gTg	p.Ala260Val/c.779C>T	prpE	EFF=missense_variant(MODERATE|MISSENSE|gCg/gTg|p.Ala260Val/c.779C>T|628|prpE|protein_coding|CODING|ACT37980|1|1),upstream_gene_variant(MODIFIER||1344||419|codB|protein_coding|CODING|ACT37981||1|WARNING_TRANSCRIPT_NO_START_CODON),upstream_gene_variant(MODIFIER||2593||427|codA|protein_coding|CODING|ACT37982||1|WARNING_TRANSCRIPT_NO_START_CODON),downstream_gene_variant(MODIFIER||3912||296|prpB|prote…	0	27	COG0365	I	NO	325356	327242	+	C779T	-928.29	-926.57	1.33e-18	2.16e-19	483.09	318.57	0.611	0.2502	620-799	0.0858	0.3159	612-661	0.185	0.951316	0.874379
327467	GGGG	GGGGGGGG	INS	upstream_gene_variant	MODIFIER	.	.	.	EFF=upstream_gene_variant(MODIFIER||7||419|codB|protein_coding|CODING|ACT37981||1|WARNING_TRANSCRIPT_NO_START_CODON),upstream_gene_variant(MODIFIER||1256||427|codA|protein_coding|CODING|ACT37982||1|WARNING_TRANSCRIPT_NO_START_CODON),upstream_gene_variant(MODIFIER||3884||219|cynT|protein_coding|CODING|ACT37984||1|WARNING_TRANSCRIPT_NO_START_CODON),upstream_gene_variant(MODIFIER||4574||156|cynS|pro…	.	.	NA	NA	.	.	.	.	.	.	.	.	.	.	.	.	.	.	.	.	.	.	.	.
327897	C	T	SNP	synonymous_variant	LOW	acC/acT	p.Thr140Thr/c.420C>T	codB	EFF=synonymous_variant(LOW|SILENT|acC/acT|p.Thr140Thr/c.420C>T|419|codB|protein_coding|CODING|ACT37981|1|1|WARNING_TRANSCRIPT_NO_START_CODON),upstream_gene_variant(MODIFIER||830||427|codA|protein_coding|CODING|ACT37982||1|WARNING_TRANSCRIPT_NO_START_CODON),upstream_gene_variant(MODIFIER||3458||219|cynT|protein_coding|CODING|ACT37984||1|WARNING_TRANSCRIPT_NO_START_CODON),upstream_gene_variant(MODI…	35	204	COG1457	F	NO	327478	328737	+	C420T	-553.48	-551.12	9.71e-14	9.35e-14	319.03	327.03	0.5561	0.0009	334-591	0.9758	0.9981	338-387	0.9697	0.909846	0.886002
331856	C	T	SNP	synonymous_variant	LOW	Ctg/Ttg	p.Leu168Leu/c.502C>T	cynT	EFF=synonymous_variant(LOW|SILENT|Ctg/Ttg|p.Leu168Leu/c.502C>T|219|cynT|protein_coding|CODING|ACT37984|1|1|WARNING_TRANSCRIPT_NO_START_CODON),upstream_gene_variant(MODIFIER||189||156|cynS|protein_coding|CODING|ACT37985||1),upstream_gene_variant(MODIFIER||692||384|cynX|protein_coding|CODING|ACT37986||1),upstream_gene_variant(MODIFIER||610||299|cynR|protein_coding|CODING|ACT37983||1),downstream_gen…	1	14	COG0288	P	NO	331355	332014	+	C502T	-272.07	-273	8.94e-09	1.12e-08	236.58	139.44	0.5961	0.0894	352-582	0.3069	0.6009	425-530	0.3332	0.996506	0.976453
335549	A	G	SNP	missense_variant	MODERATE	Ttt/Ctt	p.Phe63Leu/c.187T>C	lacY	EFF=missense_variant(MODERATE|MISSENSE|Ttt/Ctt|p.Phe63Leu/c.187T>C|417|lacY|protein_coding|CODING|ACT37988|1|1),upstream_gene_variant(MODIFIER||4303||299|cynR|protein_coding|CODING|ACT37983||1),upstream_gene_variant(MODIFIER||1133||203|lacA|protein_coding|CODING|ACT37987||1),downstream_gene_variant(MODIFIER||238||1024|lacZ|protein_coding|CODING|ACT37989||1),downstream_gene_variant(MODIFIER||3535|…	3	32	COG0477	GEPR	NO	334482	335735	-	T187C	-430.5	-431.27	8.65e-15	4.65e-15	234.42	275.59	0.3953	0.1737	169-218	0.0923	0.5121	161-210	0.2651	0.976966	0.989963
338804	G	A	SNP	missense_variant	MODERATE	Cct/Tct	p.Pro20Ser/c.58C>T	lacZ	EFF=missense_variant(MODERATE|MISSENSE|Cct/Tct|p.Pro20Ser/c.58C>T|1024|lacZ|protein_coding|CODING|ACT37989|1|1),upstream_gene_variant(MODIFIER||4388||203|lacA|protein_coding|CODING|ACT37987||1),upstream_gene_variant(MODIFIER||3069||417|lacY|protein_coding|CODING|ACT37988||1),upstream_gene_variant(MODIFIER||2363||554|mhpA|protein_coding|CODING|ACT37992||1),upstream_gene_variant(MODIFIER||4029||314…	2	18	COG3250	G	NO	335787	338861	-	C58T	-1386.56	-1385.31	9.43e-29	1.83e-29	932.07	799.45	0.5775	0.022	44-96	0.7051	0.9021	44-95	0.6847	0.947071	0.926083
339355	C	T	SNP	missense_variant	MODERATE	Gtt/Att	p.Val238Ile/c.712G>A	lacI	EFF=missense_variant(MODERATE|MISSENSE|Gtt/Att|p.Val238Ile/c.712G>A|360|lacI|protein_coding|CODING|ACT37990|1|1|WARNING_TRANSCRIPT_NO_START_CODON),upstream_gene_variant(MODIFIER||4939||203|lacA|protein_coding|CODING|ACT37987||1),upstream_gene_variant(MODIFIER||3620||417|lacY|protein_coding|CODING|ACT37988||1),upstream_gene_variant(MODIFIER||1812||554|mhpA|protein_coding|CODING|ACT37992||1),upstre…	28	40	COG1609	K	NO	338984	340066	-	G712A	-460.28	-458.47	1.78e-10	5.38e-11	254.32	155.82	0.5611	0.1469	551-718	0.1789	-0.0801	659-716	0.0608	0.95171	0.929083
340398	TGC	T	DEL	frameshift_variant	HIGH	cgc/	p.Arg231fs/c.691_692delGC	mhpR	EFF=frameshift_variant(HIGH||cgc/|p.Arg231fs/c.691_692delGC|315|mhpR|protein_coding|CODING|ACT37991|1|1),upstream_gene_variant(MODIFIER||4664||417|lacY|protein_coding|CODING|ACT37988||1),upstream_gene_variant(MODIFIER||768||554|mhpA|protein_coding|CODING|ACT37992||1),upstream_gene_variant(MODIFIER||2434||314|mhpB|protein_coding|CODING|ACT37993||1),upstream_gene_variant(MODIFIER||3381||293|mhpC|pr…	10	78	COG1414	K	NO	.	.	.	.	.	.	.	.	.	.	.	.	.	.	.	.	.	.	.
344780	C	T	SNP	missense_variant	MODERATE	gCg/gTg	p.Ala37Val/c.110C>T	mhpD	EFF=missense_variant(MODERATE|MISSENSE|gCg/gTg|p.Ala37Val/c.110C>T|269|mhpD|protein_coding|CODING|ACT37995|1|1),upstream_gene_variant(MODIFIER||4714||360|lacI|protein_coding|CODING|ACT37990||1|WARNING_TRANSCRIPT_NO_START_CODON),upstream_gene_variant(MODIFIER||697||316|mhpF|protein_coding|CODING|ACT37996||1),upstream_gene_variant(MODIFIER||3690||315|mhpR|protein_coding|CODING|ACT37991||1),upstream…	1	19	COG3971	Q	NO	344671	345480	+	C110T	-356.16	-357.87	7.45e-11	3.75e-11	214.81	213.88	0.5484	0.0416	90-139	0.5474	0.8829	92-141	0.6456	0.990848	0.978702
349473	C	T	SNP	missense_variant	MODERATE	Cgt/Tgt	p.Arg116Cys/c.346C>T	yaiL	EFF=missense_variant(MODERATE|MISSENSE|Cgt/Tgt|p.Arg116Cys/c.346C>T|179|yaiL|protein_coding|CODING|ACT37999|1|1),upstream_gene_variant(MODIFIER||4667||320|tauA|protein_coding|CODING|ACT38006||1),downstream_gene_variant(MODIFIER||4812||293|mhpC|protein_coding|CODING|ACT37994||1),downstream_gene_variant(MODIFIER||420||277|frmB|protein_coding|CODING|ACT38000||1),downstream_gene_variant(MODIFIER||399…	26	35	COG3122	S	NO	349128	349667	+	C346T	-191.05	-189.15	2.18e-07	1.44e-07	106.85	115.05	0.4734	0.0066	147-218	0.86	0.9784	147-207	0.8654	0.991909	0.982488
351006	A	G	SNP	missense_variant	MODERATE	gTa/gCa	p.Val308Ala/c.923T>C	frmA	EFF=missense_variant(MODERATE|MISSENSE|gTa/gCa|p.Val308Ala/c.923T>C|369|frmA|protein_coding|CODING|ACT38001|1|1),upstream_gene_variant(MODIFIER||3134||320|tauA|protein_coding|CODING|ACT38006||1),upstream_gene_variant(MODIFIER||4109||255|tauB|protein_coding|CODING|ACT38007||1),upstream_gene_variant(MODIFIER||280||277|frmB|protein_coding|CODING|ACT38000||1),upstream_gene_variant(MODIFIER||4873||275…	103	33	COG1062	C	NO	350819	351928	-	T923C	-470.82	-470.82	1.76e-12	1.75e-12	245.05	230.15	0.5206	0.0166	919-1027	0.7567	0.724	920-1016	0.4457	0.932197	0.829755
352272	A	AG	INS	upstream_gene_variant	MODIFIER	.	.	.	EFF=upstream_gene_variant(MODIFIER||1867||320|tauA|protein_coding|CODING|ACT38006||1),upstream_gene_variant(MODIFIER||2842||255|tauB|protein_coding|CODING|ACT38007||1),upstream_gene_variant(MODIFIER||1547||277|frmB|protein_coding|CODING|ACT38000||1),upstream_gene_variant(MODIFIER||3606||275|tauC|protein_coding|CODING|ACT38008||1),upstream_gene_variant(MODIFIER||4430||283|tauD|protein_coding|CODIN…	.	.	NA	NA	.	.	.	.	.	.	.	.	.	.	.	.	.	.	.	.	.	.	.	.
352369	A	AAG	INS	upstream_gene_variant	MODIFIER	.	.	.	EFF=upstream_gene_variant(MODIFIER||1770||320|tauA|protein_coding|CODING|ACT38006||1),upstream_gene_variant(MODIFIER||2745||255|tauB|protein_coding|CODING|ACT38007||1),upstream_gene_variant(MODIFIER||1644||277|frmB|protein_coding|CODING|ACT38000||1),upstream_gene_variant(MODIFIER||3509||275|tauC|protein_coding|CODING|ACT38008||1),upstream_gene_variant(MODIFIER||4333||283|tauD|protein_coding|CODIN…	.	.	NA	NA	.	.	.	.	.	.	.	.	.	.	.	.	.	.	.	.	.	.	.	.
354257	C	T	SNP	stop_gained	HIGH	Cag/Tag	p.Gln40*/c.118C>T	tauA	EFF=stop_gained(HIGH|NONSENSE|Cag/Tag|p.Gln40*/c.118C>T|320|tauA|protein_coding|CODING|ACT38006|1|1),upstream_gene_variant(MODIFIER||858||255|tauB|protein_coding|CODING|ACT38007||1),upstream_gene_variant(MODIFIER||3531||277|frmB|protein_coding|CODING|ACT38000||1),upstream_gene_variant(MODIFIER||1622||275|tauC|protein_coding|CODING|ACT38008||1),upstream_gene_variant(MODIFIER||2446||283|tauD|protei…	0	22	COG4521	P	NO	354140	355102	+	C118T	-402.91	-405.97	6.22e-10	2.92e-10	182.22	124.08	0.5629	0.1848	114-172	0.1177	0.4322	112-170	0.2281	0.943129	0.813715
355217	C	T	SNP	missense_variant	MODERATE	Ccg/Tcg	p.Pro35Ser/c.103C>T	tauB	EFF=missense_variant(MODERATE|MISSENSE|Ccg/Tcg|p.Pro35Ser/c.103C>T|255|tauB|protein_coding|CODING|ACT38007|1|1),upstream_gene_variant(MODIFIER||4491||277|frmB|protein_coding|CODING|ACT38000||1),upstream_gene_variant(MODIFIER||662||275|tauC|protein_coding|CODING|ACT38008||1),upstream_gene_variant(MODIFIER||1486||283|tauD|protein_coding|CODING|ACT38009||1),upstream_gene_variant(MODIFIER||3289||369|…	0	23	COG4525	P	NO	355115	355882	+	C103T	-347	-344.26	7.39e-08	3.35e-08	304.98	281.09	0.5644	0	82-131	0.9996	1	82-131	0.9981	0.998922	0.989591
356589	C	T	SNP	synonymous_variant	LOW	ctC/ctT	p.Leu237Leu/c.711C>T	tauC	EFF=synonymous_variant(LOW|SILENT|ctC/ctT|p.Leu237Leu/c.711C>T|275|tauC|protein_coding|CODING|ACT38008|1|1),upstream_gene_variant(MODIFIER||114||283|tauD|protein_coding|CODING|ACT38009||1),upstream_gene_variant(MODIFIER||4661||369|frmA|protein_coding|CODING|ACT38001||1),upstream_gene_variant(MODIFIER||4351||91|frmR|protein_coding|CODING|ACT38002||1),upstream_gene_variant(MODIFIER||3392||257|yaiO|…	0	29	COG0600	P	NO	355879	356706	+	C711T	-421.37	-419.46	3.12e-09	3.14e-09	211.55	211.63	0.6132	0	679-728	0.9997	1	679-728	0.9976	0.999999	0.99996
358014	C	T	SNP	missense_variant	MODERATE	Gcc/Acc	p.Ala208Thr/c.622G>A	hemB	EFF=missense_variant(MODERATE|MISSENSE|Gcc/Acc|p.Ala208Thr/c.622G>A|324|hemB|protein_coding|CODING|ACT38010|1|1),upstream_gene_variant(MODIFIER||4817||257|yaiO|protein_coding|CODING|ACT38003||1),upstream_gene_variant(MODIFIER||4232||167|insB-4|protein_coding|CODING|ACT38004||1),upstream_gene_variant(MODIFIER||4038||91|insA-4|protein_coding|CODING|ACT38005||1|WARNING_TRANSCRIPT_NO_START_CODON),ups…	325	101	COG0113	H	YES	357661	358635	-	G622A	-406.06	-403.44	2.09e-11	3.72e-12	298.1	301.98	0.5661	0.1084	531-628	0.2634	0.5261	532-628	0.2942	0.880557	0.814272
359169	G	GA	INS	frameshift_variant	HIGH	aaa/Aaaa	p.Lys5_Lys6fs/c.13_14insA	yaiT	EFF=frameshift_variant(HIGH||aaa/Aaaa|p.Lys5_Lys6fs/c.13_14insA|968|yaiT|protein_coding|CODING|ACT38012|1|1),upstream_gene_variant(MODIFIER||2937||222|yaiV|protein_coding|CODING|ACT38013||1),upstream_gene_variant(MODIFIER||535||324|hemB|protein_coding|CODING|ACT38010||1),upstream_gene_variant(MODIFIER||148||65|ECB_00320|protein_coding|CODING|ACT38011||1|WARNING_TRANSCRIPT_NO_START_CODON),downstre…	NA	NA	NA	NA	NO	.	.	.	.	.	.	.	.	.	.	.	.	.	.	.	.	.	.	.
363703	C	T	SNP	synonymous_variant	LOW	ccG/ccA	p.Pro77Pro/c.231G>A	ampH	EFF=synonymous_variant(LOW|SILENT|ccG/ccA|p.Pro77Pro/c.231G>A|385|ampH|protein_coding|CODING|ACT38014|1|1),upstream_gene_variant(MODIFIER||4681||65|ECB_00320|protein_coding|CODING|ACT38011||1|WARNING_TRANSCRIPT_NO_START_CODON),upstream_gene_variant(MODIFIER||582||406|sbmA|protein_coding|CODING|ACT38015||1),upstream_gene_variant(MODIFIER||1815||364|yaiW|protein_coding|CODING|ACT38016||1),upstream_…	47	52	COG1680	V	NO	362776	363933	-	G231A	-497.62	-497.28	6.11e-12	5.78e-12	299.54	295.35	0.5561	0.0043	224-307	0.9148	0.989	226-305	0.9145	0.998412	0.977138
365543	C	T	SNP	missense_variant	MODERATE	tCg/tTg	p.Ser9Leu/c.26C>T	yaiW	EFF=missense_variant(MODERATE|MISSENSE|tCg/tTg|p.Ser9Leu/c.26C>T|364|yaiW|protein_coding|CODING|ACT38016|1|1),upstream_gene_variant(MODIFIER||1696||70|yaiZ|protein_coding|CODING|ACT38018||1),upstream_gene_variant(MODIFIER||1610||385|ampH|protein_coding|CODING|ACT38014||1),upstream_gene_variant(MODIFIER||3489||86|yaiB|protein_coding|CODING|ACT38020||1),upstream_gene_variant(MODIFIER||3850||471|pho…	29	38	NA	NA	NO	365518	366612	+	C26T	-463.3	-461.11	1.62e-10	1.48e-10	153.5	164.59	0.5664	0.066	4-118	0.3639	0.7839	3-118	0.4621	0.998593	0.969939
370643	C	T	SNP	synonymous_variant	LOW	ggC/ggT	p.Gly417Gly/c.1251C>T	phoA	EFF=synonymous_variant(LOW|SILENT|ggC/ggT|p.Gly417Gly/c.1251C>T|471|phoA|protein_coding|CODING|ACT38021|1|1|WARNING_TRANSCRIPT_NO_START_CODON),upstream_gene_variant(MODIFIER||284||106|psiF|protein_coding|CODING|ACT38022||1),upstream_gene_variant(MODIFIER||706||371|yaiC|protein_coding|CODING|ACT38023||1),upstream_gene_variant(MODIFIER||3664||102|yaiY|protein_coding|CODING|ACT38017||1),upstream_gen…	4	38	COG1785	P	NO	369393	370808	+	C1251T	-570.91	-572.25	1.08e-14	5e-15	375.16	393.54	0.5656	0.0325	1196-1263	0.6101	0.851	1193-1263	0.6004	0.9958	0.99647
371146	C	T	SNP	stop_gained	HIGH	Cag/Tag	p.Gln74*/c.220C>T	psiF	EFF=stop_gained(HIGH|NONSENSE|Cag/Tag|p.Gln74*/c.220C>T|106|psiF|protein_coding|CODING|ACT38022|1|1),upstream_gene_variant(MODIFIER||203||371|yaiC|protein_coding|CODING|ACT38023||1),upstream_gene_variant(MODIFIER||4167||102|yaiY|protein_coding|CODING|ACT38017||1),upstream_gene_variant(MODIFIER||2264||152|yaiI|protein_coding|CODING|ACT38025||1),upstream_gene_variant(MODIFIER||2577||364|ddlA|protei…	3	197	NA	NA	NO	370927	371247	+	C220T	-96.32	-94.82	0.000468629	0.000177453	43.41	50.21	0.4901	0.0254	218-267	0.6466	0.8804	202-254	0.6406	0.985778	0.987315
373774	C	T	SNP	missense_variant	MODERATE	aCc/aTc	p.Thr122Ile/c.365C>T	yaiI	EFF=missense_variant(MODERATE|MISSENSE|aCc/aTc|p.Thr122Ile/c.365C>T|152|yaiI|protein_coding|CODING|ACT38025|1|1),upstream_gene_variant(MODIFIER||277||174|aroL|protein_coding|CODING|ACT38026||1),upstream_gene_variant(MODIFIER||851||63|yaiA|protein_coding|CODING|ACT38027||1),upstream_gene_variant(MODIFIER||1300||225|aroM|protein_coding|CODING|ACT38028||1),upstream_gene_variant(MODIFIER||2049||94|ya…	63	38	COG1671	S	NO	373410	373868	+	C365T	-191.56	-193.99	2.27e-06	3.1e-06	105.5	92.44	0.5797	0.1078	312-376	0.2746	0.3904	308-376	0.2122	0.922011	0.876585
374240	G	A	SNP	missense_variant	MODERATE	Gcg/Acg	p.Ala64Thr/c.190G>A	aroL	EFF=missense_variant(MODERATE|MISSENSE|Gcg/Acg|p.Ala64Thr/c.190G>A|174|aroL|protein_coding|CODING|ACT38026|1|1),upstream_gene_variant(MODIFIER||385||63|yaiA|protein_coding|CODING|ACT38027||1),upstream_gene_variant(MODIFIER||834||225|aroM|protein_coding|CODING|ACT38028||1),upstream_gene_variant(MODIFIER||1583||94|yaiE|protein_coding|CODING|ACT38029||1),upstream_gene_variant(MODIFIER||2075||93|ykiA…	137	121	COG0703	E	NO	374051	374575	+	G190A	-194.15	-191.16	1.03e-07	9.65e-08	128.74	129.04	0.5308	0.1237	157-306	0.2223	0.6016	270-340	0.3501	0.969651	0.852514
379177	C	T	SNP	missense_variant	MODERATE	gCg/gTg	p.Ala204Val/c.611C>T	yajF	EFF=missense_variant(MODERATE|MISSENSE|gCg/gTg|p.Ala204Val/c.611C>T|302|yajF|protein_coding|CODING|ACT38034|1|1|WARNING_TRANSCRIPT_NO_START_CODON),upstream_gene_variant(MODIFIER||1910||167|insB-5|protein_coding|CODING|ACT38031||1),upstream_gene_variant(MODIFIER||1716||91|insA-5|protein_coding|CODING|ACT38032||1|WARNING_TRANSCRIPT_NO_START_CODON),upstream_gene_variant(MODIFIER||735||303|rdgC|prote…	14	48	COG1940	KG	NO	378567	379475	+	C611T	-393.32	-390.96	6.35e-12	2.42e-12	212.1	202.76	0.5262	0.0801	597-646	0.3553	0.8657	606-655	0.6295	0.991515	0.988323
379315	T	TGG	INS	frameshift_variant	HIGH	ctg/ctGGg	p.Leu250_Gly251fs/c.750_751insGG	yajF	EFF=frameshift_variant(HIGH||ctg/ctGGg|p.Leu250_Gly251fs/c.750_751insGG|302|yajF|protein_coding|CODING|ACT38034|1|1|WARNING_TRANSCRIPT_NO_START_CODON),upstream_gene_variant(MODIFIER||2049||167|insB-5|protein_coding|CODING|ACT38031||1),upstream_gene_variant(MODIFIER||1855||91|insA-5|protein_coding|CODING|ACT38032||1|WARNING_TRANSCRIPT_NO_START_CODON),upstream_gene_variant(MODIFIER||874||303|rdgC|p…	14	48	COG1940	KG	NO	.	.	.	.	.	.	.	.	.	.	.	.	.	.	.	.	.	.	.
381072	G	A	SNP	synonymous_variant	LOW	ggC/ggT	p.Gly1035Gly/c.3105C>T	sbcC	EFF=synonymous_variant(LOW|SILENT|ggC/ggT|p.Gly1035Gly/c.3105C>T|1048|sbcC|protein_coding|CODING|ACT38036|1|1),upstream_gene_variant(MODIFIER||3805||167|insB-5|protein_coding|CODING|ACT38031||1),upstream_gene_variant(MODIFIER||3611||91|insA-5|protein_coding|CODING|ACT38032||1|WARNING_TRANSCRIPT_NO_START_CODON),upstream_gene_variant(MODIFIER||2630||303|rdgC|protein_coding|CODING|ACT38033||1),upstr…	28	31	COG0419	L	NO	381030	384176	-	C1247T-C3105T	-1247.72	-1245.62	1.32e-31	8.63e-33	596.21	550.71	0.5326	0.2478	2978-3111	0.0694	-0.0528	1178-1252	0.0663	0.938644
382930	G	A	SNP	missense_variant	MODERATE	gCg/gTg	p.Ala416Val/c.1247C>T	sbcC	EFF=missense_variant(MODERATE|MISSENSE|gCg/gTg|p.Ala416Val/c.1247C>T|1048|sbcC|protein_coding|CODING|ACT38036|1|1),upstream_gene_variant(MODIFIER||4488||303|rdgC|protein_coding|CODING|ACT38033||1),upstream_gene_variant(MODIFIER||2635||229|phoB|protein_coding|CODING|ACT38038||1),upstream_gene_variant(MODIFIER||2026||394|araJ|protein_coding|CODING|ACT38035||1),upstream_gene_variant(MODIFIER||3382||…	28	31	COG0419	L	NO	381030	384176	-	C1247T-C3105T	-1247.72	-1245.62	1.32e-31	8.63e-33	596.21	550.71	0.5326	0.2478	2978-3111	0.0694	-0.0528	1178-1252	0.0663	0.938644
386225	A	G	SNP	missense_variant	MODERATE	Aca/Gca	p.Thr221Ala/c.661A>G	phoB	EFF=missense_variant(MODERATE|MISSENSE|Aca/Gca|p.Thr221Ala/c.661A>G|229|phoB|protein_coding|CODING|ACT38038|1|1),upstream_gene_variant(MODIFIER||87||431|phoR|protein_coding|CODING|ACT38039||1|WARNING_TRANSCRIPT_NO_START_CODON),upstream_gene_variant(MODIFIER||1789||439|brnQ|protein_coding|CODING|ACT38040||1),upstream_gene_variant(MODIFIER||2049||1048|sbcC|protein_coding|CODING|ACT38036||1),upstrea…	26	54	COG0745	TK	NO	385565	386254	+	A661G	-278.51	-278.51	9.15e-09	8.73e-09	195.44	220.5	0.5304	0.0884	466-684	0.2905	0.4701	468-542	0.2159	0.999913	0.99889
387543	T	C	SNP	missense_variant	MODERATE	gTa/gCa	p.Val411Ala/c.1232T>C	phoR	EFF=missense_variant(MODERATE|MISSENSE|gTa/gCa|p.Val411Ala/c.1232T>C|431|phoR|protein_coding|CODING|ACT38039|1|1|WARNING_TRANSCRIPT_NO_START_CODON),upstream_gene_variant(MODIFIER||471||439|brnQ|protein_coding|CODING|ACT38040||1),upstream_gene_variant(MODIFIER||3367||1048|sbcC|protein_coding|CODING|ACT38036||1),upstream_gene_variant(MODIFIER||1866||457|proY|protein_coding|CODING|ACT38041||1),upstr…	29	49	COG0642	T	NO	386312	387607	+	T1232C	-557.89	-557.78	2.74e-15	1.77e-15	171.22	179.45	0.5019	0.1812	1192-1241	0.1264	0.4525	1189-1238	0.2328	0.98158	0.96031
387740	G	T	SNP	upstream_gene_variant	MODIFIER	.	.	.	EFF=upstream_gene_variant(MODIFIER||274||439|brnQ|protein_coding|CODING|ACT38040||1),upstream_gene_variant(MODIFIER||3564||1048|sbcC|protein_coding|CODING|ACT38036||1),upstream_gene_variant(MODIFIER||1669||457|proY|protein_coding|CODING|ACT38041||1),upstream_gene_variant(MODIFIER||2365||400|sbcD|protein_coding|CODING|ACT38037||1),upstream_gene_variant(MODIFIER||3198||605|malZ|protein_coding|CODIN…	.	.	NA	NA	.	.	.	.	.	.	.	.	.	.	.	.	.	.	.	.	.	.	.	.
389134	C	T	SNP	missense_variant	MODERATE	cCg/cTg	p.Pro374Leu/c.1121C>T	brnQ	EFF=missense_variant(MODERATE|MISSENSE|cCg/cTg|p.Pro374Leu/c.1121C>T|439|brnQ|protein_coding|CODING|ACT38040|1|1),upstream_gene_variant(MODIFIER||4958||1048|sbcC|protein_coding|CODING|ACT38036||1),upstream_gene_variant(MODIFIER||275||457|proY|protein_coding|CODING|ACT38041||1),upstream_gene_variant(MODIFIER||3759||400|sbcD|protein_coding|CODING|ACT38037||1),upstream_gene_variant(MODIFIER||1804||6…	131	40	COG1114	E	NO	388014	389333	+	C1121T	-581.6	-586.51	4.31e-14	2.22e-13	320.36	256.34	0.5375	0.2618	1103-1158	0.0567	0.4307	1110-1159	0.2295	0.810751	0.743682
390845	G	GC	INS	upstream_gene_variant	MODIFIER	.	.	.	EFF=upstream_gene_variant(MODIFIER||92||605|malZ|protein_coding|CODING|ACT38042||1),upstream_gene_variant(MODIFIER||2588||356|queA|protein_coding|CODING|ACT38043||1),upstream_gene_variant(MODIFIER||3714||375|tgt|protein_coding|CODING|ACT38044||1),upstream_gene_variant(MODIFIER||4864||110|yajC|protein_coding|CODING|ACT38045||1),downstream_gene_variant(MODIFIER||4592||229|phoB|protein_coding|CODING…	.	.	NA	NA	.	.	.	.	.	.	.	.	.	.	.	.	.	.	.	.	.	.	.	.
393918	G	A	SNP	missense_variant	MODERATE	cGc/cAc	p.Arg162His/c.485G>A	queA	EFF=missense_variant(MODERATE|MISSENSE|cGc/cAc|p.Arg162His/c.485G>A|356|queA|protein_coding|CODING|ACT38043|1|1),upstream_gene_variant(MODIFIER||642||375|tgt|protein_coding|CODING|ACT38044||1),upstream_gene_variant(MODIFIER||1792||110|yajC|protein_coding|CODING|ACT38045||1),upstream_gene_variant(MODIFIER||2152||615|secD|protein_coding|CODING|ACT38046||1|WARNING_TRANSCRIPT_NO_START_CODON),upstream…	234	57	COG0809	J	NO	393434	394504	+	G485A	-437.63	-431.87	1.78e-11	1.67e-11	166.26	174.44	0.5611	0.002	468-517	0.9537	0.998	437-509	0.9688	0.901971	0.828384
402650	A	G	SNP	synonymous_variant	LOW	gaA/gaG	p.Glu258Glu/c.774A>G	ribD	EFF=synonymous_variant(LOW|SILENT|gaA/gaG|p.Glu258Glu/c.774A>G|367|ribD|protein_coding|CODING|ACT38052|1|1|WARNING_TRANSCRIPT_NO_START_CODON),upstream_gene_variant(MODIFIER||419||156|ribH|protein_coding|CODING|ACT38053||1),upstream_gene_variant(MODIFIER||909||139|nusB|protein_coding|CODING|ACT38054||1|WARNING_TRANSCRIPT_NO_START_CODON),upstream_gene_variant(MODIFIER||1406||325|thiL|protein_coding…	144	88	COG0117	H	YES	401877	402980	+	A774G	-468.24	-471.5	4.41e-11	1.26e-10	412.4	433.46	0.5411	0.0666	719-786	0.4119	0.7747	709-785	0.5092	0.989898	0.970234
403030	G	GC	INS	upstream_gene_variant	MODIFIER	.	.	.	EFF=upstream_gene_variant(MODIFIER||38||156|ribH|protein_coding|CODING|ACT38053||1),upstream_gene_variant(MODIFIER||528||139|nusB|protein_coding|CODING|ACT38054||1|WARNING_TRANSCRIPT_NO_START_CODON),upstream_gene_variant(MODIFIER||1025||325|thiL|protein_coding|CODING|ACT38055||1),upstream_gene_variant(MODIFIER||1980||172|pgpA|protein_coding|CODING|ACT38056||1),upstream_gene_variant(MODIFIER||2596…	.	.	NA	NA	.	.	.	.	.	.	.	.	.	.	.	.	.	.	.	.	.	.	.	.
403191	C	T	SNP	synonymous_variant	LOW	atC/atT	p.Ile41Ile/c.123C>T	ribH	EFF=synonymous_variant(LOW|SILENT|atC/atT|p.Ile41Ile/c.123C>T|156|ribH|protein_coding|CODING|ACT38053|1|1),upstream_gene_variant(MODIFIER||368||139|nusB|protein_coding|CODING|ACT38054||1|WARNING_TRANSCRIPT_NO_START_CODON),upstream_gene_variant(MODIFIER||865||325|thiL|protein_coding|CODING|ACT38055||1),upstream_gene_variant(MODIFIER||1820||172|pgpA|protein_coding|CODING|ACT38056||1),upstream_gene_…	662	294	COG0054	H	YES	403069	403539	+	C123T	-180.85	-178.84	1e-05	3.65e-06	79.78	89.46	0.5387	0.0243	47-163	0.6989	0.8499	56-151	0.614	0.971601	0.964487
405125	A	G	SNP	missense_variant	MODERATE	Acg/Gcg	p.Thr39Ala/c.115A>G	pgpA	EFF=missense_variant(MODERATE|MISSENSE|Acg/Gcg|p.Thr39Ala/c.115A>G|172|pgpA|protein_coding|CODING|ACT38056|1|1),upstream_gene_variant(MODIFIER||4690||257|tsx|protein_coding|CODING|ACT38049||1),upstream_gene_variant(MODIFIER||3852||179|yajI|protein_coding|CODING|ACT38050||1),upstream_gene_variant(MODIFIER||4846||482|thiI|protein_coding|CODING|ACT38061||1),downstream_gene_variant(MODIFIER||458||324…	107	111	COG1267	I	NO	405011	405529	+	A115G	-221.65	-221.25	7.78e-07	7.79e-07	95.01	95.59	0.5238	0	91-140	0.999	0.9999	91-140	0.9956	0.999993	0.999975
408816	T	C	SNP	synonymous_variant	LOW	ggA/ggG	p.Gly236Gly/c.708A>G	ispA	EFF=synonymous_variant(LOW|SILENT|ggA/ggG|p.Gly236Gly/c.708A>G|299|ispA|protein_coding|CODING|ACT38059|1|1),upstream_gene_variant(MODIFIER||1155||482|thiI|protein_coding|CODING|ACT38061||1),upstream_gene_variant(MODIFIER||2259||324|yajO|protein_coding|CODING|ACT38057||1),upstream_gene_variant(MODIFIER||4289||163|yajQ|protein_coding|CODING|ACT38064||1),upstream_gene_variant(MODIFIER||217||620|dxs|…	152	83	COG0142	H	YES	408624	409523	-	A708G	-390.74	-394.01	8.02e-08	2.78e-08	163.1	116.34	0.5471	0.1321	656-709	0.1907	0.1509	662-711	0.1094	0.945648	0.939685
409646	T	C	SNP	synonymous_variant	LOW	gaA/gaG	p.Glu40Glu/c.120A>G	xseB	EFF=synonymous_variant(LOW|SILENT|gaA/gaG|p.Glu40Glu/c.120A>G|80|xseB|protein_coding|CODING|ACT38060|1|1),upstream_gene_variant(MODIFIER||325||482|thiI|protein_coding|CODING|ACT38061||1),upstream_gene_variant(MODIFIER||3089||324|yajO|protein_coding|CODING|ACT38057||1),upstream_gene_variant(MODIFIER||3459||163|yajQ|protein_coding|CODING|ACT38064||1),upstream_gene_variant(MODIFIER||1047||620|dxs|pr…	159	89	COG1722	L	NO	409523	409765	-	A120G	-84.2	-87.06	0.00270347	0.00278822	35.62	24.68	0.5514	0.3023	25-151	0.0433	-0.349	79-142	0.0214	0.615931	0.575945
413485	C	T	SNP	synonymous_variant	LOW	ggC/ggT	p.Gly127Gly/c.381C>T	yajQ	EFF=synonymous_variant(LOW|SILENT|ggC/ggT|p.Gly127Gly/c.381C>T|163|yajQ|protein_coding|CODING|ACT38064|1|1),upstream_gene_variant(MODIFIER||4886||620|dxs|protein_coding|CODING|ACT38058||1),upstream_gene_variant(MODIFIER||3962||299|ispA|protein_coding|CODING|ACT38059||1),upstream_gene_variant(MODIFIER||3720||80|xseB|protein_coding|CODING|ACT38060||1),upstream_gene_variant(MODIFIER||2020||311|ECB_0…	730	259	COG1666	S	NO	413105	413596	+	C381T	-179.65	-179.78	3.99e-06	2.06e-06	121.17	129.29	0.4968	0.052	374-423	0.4558	0.7856	379-428	0.5115	0.980212	0.965808
416535	T	C	SNP	synonymous_variant	LOW	gtA/gtG	p.Val168Val/c.504A>G	ECB_00377	EFF=synonymous_variant(LOW|SILENT|gtA/gtG|p.Val168Val/c.504A>G|180|ECB_00377|protein_coding|CODING|ACT38067|1|1),upstream_gene_variant(MODIFIER||4472||196|thiJ|protein_coding|CODING|ACT38062||1),upstream_gene_variant(MODIFIER||3598||303|apbA|protein_coding|CODING|ACT38063||1),upstream_gene_variant(MODIFIER||1447||454|yajR|protein_coding|CODING|ACT38065||1),downstream_gene_variant(MODIFIER||487||1…	NA	NA	NA	NA	NO	416496	417038	-	T134C-A504G	-172.16	-172.16	9.45e-07	9.21e-07	121.62	128.41	0.4309	0.1147	448-540	0.2108	0.5054	306-420	0.2605	0.826322	0.880196
416905	A	G	SNP	missense_variant	MODERATE	cTa/cCa	p.Leu45Pro/c.134T>C	ECB_00377	EFF=missense_variant(MODERATE|MISSENSE|cTa/cCa|p.Leu45Pro/c.134T>C|180|ECB_00377|protein_coding|CODING|ACT38067|1|1),upstream_gene_variant(MODIFIER||4842||196|thiJ|protein_coding|CODING|ACT38062||1),upstream_gene_variant(MODIFIER||3968||303|apbA|protein_coding|CODING|ACT38063||1),upstream_gene_variant(MODIFIER||1817||454|yajR|protein_coding|CODING|ACT38065||1),downstream_gene_variant(MODIFIER||11…	NA	NA	NA	NA	NO	416496	417038	-	T134C-A504G	-172.16	-172.16	9.45e-07	9.21e-07	121.62	128.41	0.4309	0.1147	448-540	0.2108	0.5054	306-420	0.2605	0.826322	0.880196
427313	A	G	SNP	upstream_gene_variant	MODIFIER	.	.	.	EFF=upstream_gene_variant(MODIFIER||5000||315|cyoA|protein_coding|CODING|ACT38073||1),upstream_gene_variant(MODIFIER||69||207|clpP|protein_coding|CODING|ACT38078||1),upstream_gene_variant(MODIFIER||818||424|clpX|protein_coding|CODING|ACT38079||1),upstream_gene_variant(MODIFIER||3063||491|ampG|protein_coding|CODING|ACT38074||1),upstream_gene_variant(MODIFIER||2441||192|yajG|protein_coding|CODING|A…	.	.	NA	NA	.	.	.	.	.	.	.	.	.	.	.	.	.	.	.	.	.	.	.	.
427447	A	G	SNP	synonymous_variant	LOW	gaA/gaG	p.Glu22Glu/c.66A>G	clpP	EFF=synonymous_variant(LOW|SILENT|gaA/gaG|p.Glu22Glu/c.66A>G|207|clpP|protein_coding|CODING|ACT38078|1|1),upstream_gene_variant(MODIFIER||684||424|clpX|protein_coding|CODING|ACT38079||1),upstream_gene_variant(MODIFIER||3197||491|ampG|protein_coding|CODING|ACT38074||1),upstream_gene_variant(MODIFIER||2575||192|yajG|protein_coding|CODING|ACT38075||1),upstream_gene_variant(MODIFIER||3496||784|lon|pr…	665	399	COG0740	OU	NO	427382	428005	+	A66G	-243.26	-245.46	5.95e-07	3.62e-06	152.73	145.12	0.5038	0.0108	36-89	0.815	0.9831	33-82	0.8797	0.995607	0.956367
428840	A	G	SNP	missense_variant	MODERATE	cAg/cGg	p.Gln237Arg/c.710A>G	clpX	EFF=missense_variant(MODERATE|MISSENSE|cAg/cGg|p.Gln237Arg/c.710A>G|424|clpX|protein_coding|CODING|ACT38079|1|1),upstream_gene_variant(MODIFIER||4590||491|ampG|protein_coding|CODING|ACT38074||1),upstream_gene_variant(MODIFIER||3968||192|yajG|protein_coding|CODING|ACT38075||1),upstream_gene_variant(MODIFIER||2103||784|lon|protein_coding|CODING|ACT38081||1),upstream_gene_variant(MODIFIER||4666||90|…	591	403	COG1219	O	NO	428131	429405	+	A710G	-548.18	-548.24	8.81e-14	8.7e-14	231.89	231.96	0.5137	0.0001	692-741	0.9978	0.9999	691-743	0.9949	0.999996	0.999947
430835	C	T	SNP	upstream_gene_variant	MODIFIER	.	.	.	EFF=upstream_gene_variant(MODIFIER||108||784|lon|protein_coding|CODING|ACT38081||1),upstream_gene_variant(MODIFIER||2671||90|hupB|protein_coding|CODING|ACT38082||1|WARNING_TRANSCRIPT_NO_START_CODON),upstream_gene_variant(MODIFIER||3135||623|ppiD|protein_coding|CODING|ACT38083||1),upstream_gene_variant(MODIFIER||48||370|insL-2|protein_coding|CODING|ACT38080||1),downstream_gene_variant(MODIFIER||36…	.	.	NA	NA	.	.	.	.	.	.	.	.	.	.	.	.	.	.	.	.	.	.	.	.
430852	C	T	SNP	upstream_gene_variant	MODIFIER	.	.	.	EFF=upstream_gene_variant(MODIFIER||91||784|lon|protein_coding|CODING|ACT38081||1),upstream_gene_variant(MODIFIER||2654||90|hupB|protein_coding|CODING|ACT38082||1|WARNING_TRANSCRIPT_NO_START_CODON),upstream_gene_variant(MODIFIER||3118||623|ppiD|protein_coding|CODING|ACT38083||1),upstream_gene_variant(MODIFIER||65||370|insL-2|protein_coding|CODING|ACT38080||1),downstream_gene_variant(MODIFIER||371…	.	.	NA	NA	.	.	.	.	.	.	.	.	.	.	.	.	.	.	.	.	.	.	.	.
439082	C	T	SNP	missense_variant	MODERATE	Gcc/Acc	p.Ala100Thr/c.298G>A	ybaE	EFF=missense_variant(MODERATE|MISSENSE|Gcc/Acc|p.Ala100Thr/c.298G>A|566|ybaE|protein_coding|CODING|ACT38087|1|1),upstream_gene_variant(MODIFIER||397||272|cof|protein_coding|CODING|ACT38088||1),upstream_gene_variant(MODIFIER||1368||152|ybaO|protein_coding|CODING|ACT38089||1),upstream_gene_variant(MODIFIER||1856||590|mdlA|protein_coding|CODING|ACT38090||1|WARNING_TRANSCRIPT_NO_START_CODON),upstream…	2	42	COG4533	R	NO	437679	439379	-	G298A	-660.54	-660.2	5.04e-17	5.04e-17	437.66	436.6	0.581	0.0861	279-328	0.3332	0.4939	279-328	0.2738	0.999784	0.99868
440331	GT	G	DEL	upstream_gene_variant	MODIFIER	.	.	.	EFF=upstream_gene_variant(MODIFIER||118||152|ybaO|protein_coding|CODING|ACT38089||1),upstream_gene_variant(MODIFIER||606||590|mdlA|protein_coding|CODING|ACT38090||1|WARNING_TRANSCRIPT_NO_START_CODON),upstream_gene_variant(MODIFIER||2718||231|ybaX|protein_coding|CODING|ACT38086||1),upstream_gene_variant(MODIFIER||2371||593|mdlB|protein_coding|CODING|ACT38091||1),upstream_gene_variant(MODIFIER||953…	.	.	NA	NA	.	.	.	.	.	.	.	.	.	.	.	.	.	.	.	.	.	.	.	.
444489	C	T	SNP	upstream_gene_variant	MODIFIER	.	.	.	EFF=upstream_gene_variant(MODIFIER||176||112|glnK|protein_coding|CODING|ACT38092||1),upstream_gene_variant(MODIFIER||544||428|amtB|protein_coding|CODING|ACT38093||1),upstream_gene_variant(MODIFIER||2957||190|ybaY|protein_coding|CODING|ACT38095||1),upstream_gene_variant(MODIFIER||4250||117|ybaA|protein_coding|CODING|ACT38097||1),downstream_gene_variant(MODIFIER||4192||272|cof|protein_coding|CODING…	.	.	NA	NA	.	.	.	.	.	.	.	.	.	.	.	.	.	.	.	.	.	.	.	.
444803	C	CG	INS	frameshift_variant	HIGH	cgg/cGgg	p.Arg47_Gly48fs/c.140_141insG	glnK	EFF=frameshift_variant(HIGH||cgg/cGgg|p.Arg47_Gly48fs/c.140_141insG|112|glnK|protein_coding|CODING|ACT38092|1|1),upstream_gene_variant(MODIFIER||229||428|amtB|protein_coding|CODING|ACT38093||1),upstream_gene_variant(MODIFIER||2642||190|ybaY|protein_coding|CODING|ACT38095||1),upstream_gene_variant(MODIFIER||3935||117|ybaA|protein_coding|CODING|ACT38097||1),downstream_gene_variant(MODIFIER||4507||2…	0	19	COG0347	E	NO	.	.	.	.	.	.	.	.	.	.	.	.	.	.	.	.	.	.	.
445095	G	A	SNP	missense_variant	MODERATE	atG/atA	p.Met21Ile/c.63G>A	amtB	EFF=missense_variant(MODERATE|MISSENSE|atG/atA|p.Met21Ile/c.63G>A|428|amtB|protein_coding|CODING|ACT38093|1|1),upstream_gene_variant(MODIFIER||2351||190|ybaY|protein_coding|CODING|ACT38095||1),upstream_gene_variant(MODIFIER||3644||117|ybaA|protein_coding|CODING|ACT38097||1),downstream_gene_variant(MODIFIER||4798||272|cof|protein_coding|CODING|ACT38088||1),downstream_gene_variant(MODIFIER||4187||1…	7	33	COG0004	P	NO	445033	446319	+	G63A	-600.19	-596.99	1.43e-13	9.27e-14	157.63	232.83	0.5209	0.003	49-235	0.9328	0.9942	49-209	0.9384	0.979867	0.980114
448006	T	C	SNP	synonymous_variant	LOW	ccT/ccC	p.Pro187Pro/c.561T>C	ybaY	EFF=synonymous_variant(LOW|SILENT|ccT/ccC|p.Pro187Pro/c.561T>C|190|ybaY|protein_coding|CODING|ACT38095|1|1),upstream_gene_variant(MODIFIER||733||117|ybaA|protein_coding|CODING|ACT38097||1),upstream_gene_variant(MODIFIER||778||286|tesB|protein_coding|CODING|ACT38094||1),downstream_gene_variant(MODIFIER||43||129|ybaZ|protein_coding|CODING|ACT38096||1),downstream_gene_variant(MODIFIER||1128||516|yla…	8	89	COG3126	S	NO	447446	448018	+	T561C	-245.82	-244.28	1.68e-05	1.09e-05	47.71	64.24	0.5352	0.0056	422-561	0.8457	0.984	422-561	0.845	0.919757	0.84057
451211	C	T	SNP	synonymous_variant	LOW	ccG/ccA	p.Pro36Pro/c.108G>A	ylaC	EFF=synonymous_variant(LOW|SILENT|ccG/ccA|p.Pro36Pro/c.108G>A|156|ylaC|protein_coding|CODING|ACT38099|1|1),upstream_gene_variant(MODIFIER||3983||286|tesB|protein_coding|CODING|ACT38094||1),upstream_gene_variant(MODIFIER||2773||129|ybaZ|protein_coding|CODING|ACT38096||1),upstream_gene_variant(MODIFIER||527||516|ylaB|protein_coding|CODING|ACT38098||1|WARNING_TRANSCRIPT_NO_START_CODON),downstream_ge…	282	106	NA	NA	NO	450848	451318	-	G108A	-143.65	-141.51	1.04e-06	1.61e-06	72.64	133.81	0.4708	0.1141	43-211	0.2204	-0.1698	67-116	0.0422	0.89296	0.909627
457701	T	C	SNP	upstream_gene_variant	MODIFIER	.	.	.	EFF=upstream_gene_variant(MODIFIER||4926||124|ybaJ|protein_coding|CODING|ACT38102||1),upstream_gene_variant(MODIFIER||127||215|acrR|protein_coding|CODING|ACT38105||1),upstream_gene_variant(MODIFIER||902||1120|kefA|protein_coding|CODING|ACT38106||1),upstream_gene_variant(MODIFIER||1231||1049|acrB|protein_coding|CODING|ACT38103||1),upstream_gene_variant(MODIFIER||15||397|acrA|protein_coding|CODING|…	.	.	NA	NA	.	.	.	.	.	.	.	.	.	.	.	.	.	.	.	.	.	.	.	.
465802	C	T	SNP	synonymous_variant	LOW	agC/agT	p.Ser548Ser/c.1644C>T	dnaX	EFF=synonymous_variant(LOW|SILENT|agC/agT|p.Ser548Ser/c.1644C>T|643|dnaX|protein_coding|CODING|ACT38111|1|1),upstream_gene_variant(MODIFIER||341||109|ybaB|protein_coding|CODING|ACT38112||1),upstream_gene_variant(MODIFIER||670||201|recR|protein_coding|CODING|ACT38113||1),upstream_gene_variant(MODIFIER||1385||624|htpG|protein_coding|CODING|ACT38114||1),upstream_gene_variant(MODIFIER||3464||53|ybaM|…	186	57	COG2812	L	YES	464159	466090	+	C1644T	-907.24	-904.8	1.91e-18	1.76e-18	250.89	251.82	0.5486	0.0047	1630-1679	0.9089	0.9927	1631-1681	0.9332	0.999705	0.99839
466993	C	T	SNP	synonymous_variant	LOW	ggC/ggT	p.Gly174Gly/c.522C>T	recR	EFF=synonymous_variant(LOW|SILENT|ggC/ggT|p.Gly174Gly/c.522C>T|201|recR|protein_coding|CODING|ACT38113|1|1),upstream_gene_variant(MODIFIER||194||624|htpG|protein_coding|CODING|ACT38114||1),upstream_gene_variant(MODIFIER||4655||53|ybaM|protein_coding|CODING|ACT38107||1),upstream_gene_variant(MODIFIER||4114||175|priC|protein_coding|CODING|ACT38108||1|WARNING_TRANSCRIPT_NO_START_CODON),upstream_gene…	243	89	COG0353	L	NO	466472	467077	+	C522T	-289.43	-287.33	9.59e-05	9.71e-05	43.79	43.62	0.5509	0	324-436	0.9998	1	325-385	0.9983	0.999999	0.999955
467322	C	T	SNP	synonymous_variant	LOW	Ctg/Ttg	p.Leu46Leu/c.136C>T	htpG	EFF=synonymous_variant(LOW|SILENT|Ctg/Ttg|p.Leu46Leu/c.136C>T|624|htpG|protein_coding|CODING|ACT38114|1|1),upstream_gene_variant(MODIFIER||4984||53|ybaM|protein_coding|CODING|ACT38107||1),upstream_gene_variant(MODIFIER||4443||175|priC|protein_coding|CODING|ACT38108||1|WARNING_TRANSCRIPT_NO_START_CODON),upstream_gene_variant(MODIFIER||1920||214|adk|protein_coding|CODING|ACT38115||1),upstream_gene_…	823	480	COG0326	O	NO	467187	469061	+	C136T	-754.78	-756.15	4.1e-19	5.53e-19	266.43	272.95	0.5089	0.0381	96-145	0.5619	0.9076	124-230	0.6876	0.996685	0.989209
469535	A	G	SNP	synonymous_variant	LOW	gaA/gaG	p.Glu98Glu/c.294A>G	adk	EFF=synonymous_variant(LOW|SILENT|gaA/gaG|p.Glu98Glu/c.294A>G|214|adk|protein_coding|CODING|ACT38115|1|1),upstream_gene_variant(MODIFIER||587||320|hemH|protein_coding|CODING|ACT38116||1),upstream_gene_variant(MODIFIER||2657||434|gsk|protein_coding|CODING|ACT38118||1),downstream_gene_variant(MODIFIER||1546||319|aes|protein_coding|CODING|ACT38117||1),downstream_gene_variant(MODIFIER||3445||643|dnaX…	2216	481	COG0563	F	YES	469242	469886	+	A294G	-240.26	-244.7	3.55e-08	2.47e-08	123.48	122.08	0.5237	0.119	386-480	0.2364	0.2709	223-378	0.1622	0.98925	0.991219
472991	C	T	SNP	missense_variant	MODERATE	cCg/cTg	p.Pro267Leu/c.800C>T	gsk	EFF=missense_variant(MODERATE|MISSENSE|cCg/cTg|p.Pro267Leu/c.800C>T|434|gsk|protein_coding|CODING|ACT38118|1|1),upstream_gene_variant(MODIFIER||3990||550|ushA|protein_coding|CODING|ACT38121||1),upstream_gene_variant(MODIFIER||951||319|aes|protein_coding|CODING|ACT38117||1),downstream_gene_variant(MODIFIER||638||558|ybaL|protein_coding|CODING|ACT38119||1),downstream_gene_variant(MODIFIER||3930||62…	203	64	COG0524	G	NO	472192	473496	+	C800T	-529.83	-529.5	6.01e-12	2.86e-11	336.91	265.3	0.5511	0.0493	672-999	0.5021	0.7539	674-849	0.4861	0.924564	0.891045
474383	CGTCGCCAGC	C	DEL	disruptive_inframe_deletion	MODERATE	gtgctggcgacg/gcg	p.Val305_Thr308del/c.914_922delGCTGGCGAC	ybaL	EFF=disruptive_inframe_deletion(MODERATE||gtgctggcgacg/gcg|p.Val305_Thr308del/c.914_922delGCTGGCGAC|558|ybaL|protein_coding|CODING|ACT38119|1|1),upstream_gene_variant(MODIFIER||2597||550|ushA|protein_coding|CODING|ACT38121||1),upstream_gene_variant(MODIFIER||2344||319|aes|protein_coding|CODING|ACT38117||1),downstream_gene_variant(MODIFIER||4498||214|adk|protein_coding|CODING|ACT38115||1),downstre…	150	97	COG4651	P	NO	.	.	.	.	.	.	.	.	.	.	.	.	.	.	.	.	.	.	.
476401	C	T	SNP	synonymous_variant	LOW	gcG/gcA	p.Ala121Ala/c.363G>A	fsr	EFF=synonymous_variant(LOW|SILENT|gcG/gcA|p.Ala121Ala/c.363G>A|406|fsr|protein_coding|CODING|ACT38120|1|1),upstream_gene_variant(MODIFIER||580||550|ushA|protein_coding|CODING|ACT38121||1),upstream_gene_variant(MODIFIER||4361||319|aes|protein_coding|CODING|ACT38117||1),upstream_gene_variant(MODIFIER||3884||113|ybaQ|protein_coding|CODING|ACT38124||1),upstream_gene_variant(MODIFIER||1096||558|ybaL|p…	26	51	COG0477	GEPR	NO	475543	476763	-	G363A	-501.96	-500.47	2.84e-14	1.1e-13	344.79	347.07	0.5736	0.1095	202-372	0.2605	0.5878	222-290	0.3373	0.957417	0.956433
479731	A	G	SNP	synonymous_variant	LOW	ggT/ggC	p.Gly139Gly/c.417T>C	ybaP	EFF=synonymous_variant(LOW|SILENT|ggT/ggC|p.Gly139Gly/c.417T>C|264|ybaP|protein_coding|CODING|ACT38123|1|1),upstream_gene_variant(MODIFIER||554||113|ybaQ|protein_coding|CODING|ACT38124||1),upstream_gene_variant(MODIFIER||4426||558|ybaL|protein_coding|CODING|ACT38119||1),upstream_gene_variant(MODIFIER||2968||406|fsr|protein_coding|CODING|ACT38120||1),upstream_gene_variant(MODIFIER||4078||310|ybaS|…	28	59	COG3735	S	NO	479353	480147	-	T417C	-302.5	-304.28	7.39e-09	1.4e-08	225.31	198.5	0.5486	0.0308	217-616	0.6287	0.6578	560-616	0.3933	0.973585	0.972212
484853	A	G	SNP	missense_variant	MODERATE	cAg/cGg	p.Gln37Arg/c.110A>G	ybaT	EFF=missense_variant(MODERATE|MISSENSE|cAg/cGg|p.Gln37Arg/c.110A>G|430|ybaT|protein_coding|CODING|ACT38127|1|1),upstream_gene_variant(MODIFIER||4706||264|ybaP|protein_coding|CODING|ACT38123||1),upstream_gene_variant(MODIFIER||1308||135|cueR|protein_coding|CODING|ACT38128||1),upstream_gene_variant(MODIFIER||3234||225|ybbL|protein_coding|CODING|ACT38131||1),upstream_gene_variant(MODIFIER||1306||834…	2	29	COG0531	E	NO	484744	486036	+	A110G	-583.51	-586.21	3.87e-12	1.04e-11	250.77	179.1	0.5645	0.1331	55-162	0.203	0.4941	57-150	0.2649	0.985713	0.842057
493326	C	T	SNP	missense_variant	MODERATE	gCg/gTg	p.Ala248Val/c.743C>T	ybbP	EFF=missense_variant(MODERATE|MISSENSE|gCg/gTg|p.Ala248Val/c.743C>T|804|ybbP|protein_coding|CODING|ACT38137|1|1),upstream_gene_variant(MODIFIER||2102||1426|rhsD|protein_coding|CODING|ACT38138||1),upstream_gene_variant(MODIFIER||2879||284|ybbN|protein_coding|CODING|ACT38133||1),upstream_gene_variant(MODIFIER||2009||269|ybbO|protein_coding|CODING|ACT38134||1),upstream_gene_variant(MODIFIER||1393||2…	3	30	COG3127	Q	NO	492584	494998	+	C743T	-1170.4	-1168.3	4.88e-24	4.94e-24	559.11	559.17	0.5786	0.0025	730-847	0.945	0.9924	733-849	0.9314	0.99982	0.996181
499252	T	C	SNP	synonymous_variant	LOW	tgT/tgC	p.Cys1275Cys/c.3825T>C	rhsD	EFF=synonymous_variant(LOW|SILENT|tgT/tgC|p.Cys1275Cys/c.3825T>C|1426|rhsD|protein_coding|CODING|ACT38138|1|1),upstream_gene_variant(MODIFIER||496||122|ybbC|protein_coding|CODING|ACT38139||1),upstream_gene_variant(MODIFIER||864||236|ylbH|protein_coding|CODING|ACT38140||1),upstream_gene_variant(MODIFIER||1555||86|ybbD|protein_coding|CODING|ACT38141||1),downstream_gene_variant(MODIFIER||4254||804|y…	2	20	COG3209	M	NO	.	.	.	.	.	.	.	.	.	.	.	.	.	.	.	.	.	.	.
500831	T	C	SNP	missense_variant	MODERATE	Tca/Cca	p.Ser9Pro/c.25T>C	ybbD	EFF=missense_variant(MODERATE|MISSENSE|Tca/Cca|p.Ser9Pro/c.25T>C|86|ybbD|protein_coding|CODING|ACT38141|1|1),upstream_gene_variant(MODIFIER||3786||160|allA|protein_coding|CODING|ACT38145||1),upstream_gene_variant(MODIFIER||4346||271|allR|protein_coding|CODING|ACT38146||1),downstream_gene_variant(MODIFIER||980||123|ylbG|protein_coding|CODING|ACT38142||1),downstream_gene_variant(MODIFIER||1467||364…	NA	NA	NA	NA	NO	500807	501067	+	T25C-A250G	-54.51	-55.47	0.000229975	0.00028961	95.26	75.79	0.2797	0.1197	17-83	0.1333	0.469	35-145	0.1891	0.861057	0.855696
501056	A	G	SNP	missense_variant	MODERATE	Att/Gtt	p.Ile84Val/c.250A>G	ybbD	EFF=missense_variant(MODERATE|MISSENSE|Att/Gtt|p.Ile84Val/c.250A>G|86|ybbD|protein_coding|CODING|ACT38141|1|1),upstream_gene_variant(MODIFIER||3561||160|allA|protein_coding|CODING|ACT38145||1),upstream_gene_variant(MODIFIER||4121||271|allR|protein_coding|CODING|ACT38146||1),downstream_gene_variant(MODIFIER||755||123|ylbG|protein_coding|CODING|ACT38142||1),downstream_gene_variant(MODIFIER||1242||3…	NA	NA	NA	NA	NO	500807	501067	+	T25C-A250G	-54.51	-55.47	0.000229975	0.00028961	95.26	75.79	0.2797	0.1197	17-83	0.1333	0.469	35-145	0.1891	0.861057	0.855696
505744	C	T	SNP	missense_variant	MODERATE	Ccc/Tcc	p.Pro190Ser/c.568C>T	allR	EFF=missense_variant(MODERATE|MISSENSE|Ccc/Tcc|p.Pro190Ser/c.568C>T|271|allR|protein_coding|CODING|ACT38146|1|1),upstream_gene_variant(MODIFIER||338||593|gcl|protein_coding|CODING|ACT38147||1),upstream_gene_variant(MODIFIER||3562||123|ylbG|protein_coding|CODING|ACT38142||1),upstream_gene_variant(MODIFIER||2132||258|hyi|protein_coding|CODING|ACT38148||1),upstream_gene_variant(MODIFIER||2352||364|y…	146	130	COG1414	K	NO	505177	505992	+	C568T-A769G	-345.09	-350.09	1.42e-08	8.33e-08	244.63	122.54	0.5145	0.2623	757-806	0.0609	-0.2569	583-660	0.0325	0.88275	0.760282
505945	A	G	SNP	missense_variant	MODERATE	Acc/Gcc	p.Thr257Ala/c.769A>G	allR	EFF=missense_variant(MODERATE|MISSENSE|Acc/Gcc|p.Thr257Ala/c.769A>G|271|allR|protein_coding|CODING|ACT38146|1|1),upstream_gene_variant(MODIFIER||137||593|gcl|protein_coding|CODING|ACT38147||1),upstream_gene_variant(MODIFIER||3763||123|ylbG|protein_coding|CODING|ACT38142||1),upstream_gene_variant(MODIFIER||1931||258|hyi|protein_coding|CODING|ACT38148||1),upstream_gene_variant(MODIFIER||2553||364|y…	146	130	COG1414	K	NO	505177	505992	+	C568T-A769G	-345.09	-350.09	1.42e-08	8.33e-08	244.63	122.54	0.5145	0.2623	757-806	0.0609	-0.2569	583-660	0.0325	0.88275	0.760282
506098	C	T	SNP	missense_variant	MODERATE	gCc/gTc	p.Ala6Val/c.17C>T	gcl	EFF=missense_variant(MODERATE|MISSENSE|gCc/gTc|p.Ala6Val/c.17C>T|593|gcl|protein_coding|CODING|ACT38147|1|1),upstream_gene_variant(MODIFIER||3916||123|ylbG|protein_coding|CODING|ACT38142||1),upstream_gene_variant(MODIFIER||1778||258|hyi|protein_coding|CODING|ACT38148||1),upstream_gene_variant(MODIFIER||2706||364|ybbB|protein_coding|CODING|ACT38143||1),upstream_gene_variant(MODIFIER||2654||292|glx…	0	21	COG3960	R	NO	506082	507863	+	C17T	-739.58	-736.18	6.99e-20	4.17e-20	394.77	400.86	0.5438	0.078	16-212	0.2936	0.708	94-211	0.369	0.997382	0.987413
510712	A	G	SNP	missense_variant	MODERATE	gAc/gGc	p.Asp305Gly/c.914A>G	allP	EFF=missense_variant(MODERATE|MISSENSE|gAc/gGc|p.Asp305Gly/c.914A>G|484|allP|protein_coding|CODING|ACT38151|1|1),upstream_gene_variant(MODIFIER||601||453|allB|protein_coding|CODING|ACT38152||1),upstream_gene_variant(MODIFIER||2019||433|ybbY|protein_coding|CODING|ACT38153||1),upstream_gene_variant(MODIFIER||3342||381|glxK|protein_coding|CODING|ACT38154||1),downstream_gene_variant(MODIFIER||4720||2…	0	30	COG1953	FH	NO	509799	511253	+	A914G	-550.1	-550.64	6.7e-16	5.71e-16	258.52	267.78	0.5162	0.0298	870-919	0.6367	0.8013	883-971	0.5409	0.986703	0.98397
513279	A	G	SNP	synonymous_variant	LOW	gtA/gtG	p.Val183Val/c.549A>G	ybbY	EFF=synonymous_variant(LOW|SILENT|gtA/gtG|p.Val183Val/c.549A>G|433|ybbY|protein_coding|CODING|ACT38153|1|1),upstream_gene_variant(MODIFIER||775||381|glxK|protein_coding|CODING|ACT38154||1),downstream_gene_variant(MODIFIER||4627||258|hyi|protein_coding|CODING|ACT38148||1),downstream_gene_variant(MODIFIER||3649||292|glxR|protein_coding|CODING|ACT38149||1),downstream_gene_variant(MODIFIER||3339||92|…	0	35	COG2233	F	NO	512731	514032	+	A549G	-541.13	-546.08	1.51e-13	3.8e-13	365.86	347.09	0.5387	0.0954	651-700	0.3017	0.6712	520-667	0.405	0.967309	0.967632
516281	A	G	SNP	missense_variant	MODERATE	cTt/cCt	p.Leu393Pro/c.1178T>C	allC	EFF=missense_variant(MODERATE|MISSENSE|cTt/cCt|p.Leu393Pro/c.1178T>C|411|allC|protein_coding|CODING|ACT38156|1|1),upstream_gene_variant(MODIFIER||2565||555|fdrA|protein_coding|CODING|ACT38158||1),upstream_gene_variant(MODIFIER||4242||419|ylbE|protein_coding|CODING|ACT38159||1),upstream_gene_variant(MODIFIER||69||261|ylbA|protein_coding|CODING|ACT38155||1),downstream_gene_variant(MODIFIER||1199||3…	6	32	COG0624	E	NO	516223	517458	-	T1178C	-499.78	-502.47	1.67e-12	2.02e-12	279	227.99	0.5212	0.0014	1142-1191	0.9731	0.9982	1135-1188	0.9768	0.996728	0.973999
518801	C	T	SNP	upstream_gene_variant	MODIFIER	.	.	.	EFF=upstream_gene_variant(MODIFIER||45||555|fdrA|protein_coding|CODING|ACT38158||1),upstream_gene_variant(MODIFIER||1722||419|ylbE|protein_coding|CODING|ACT38159||1),upstream_gene_variant(MODIFIER||2589||261|ylbA|protein_coding|CODING|ACT38155||1),upstream_gene_variant(MODIFIER||3088||239|ylbF|protein_coding|CODING|ACT38160||1),upstream_gene_variant(MODIFIER||1343||411|allC|protein_coding|CODING|…	.	.	NA	NA	.	.	.	.	.	.	.	.	.	.	.	.	.	.	.	.	.	.	.	.
519553	C	T	SNP	synonymous_variant	LOW	ggC/ggT	p.Gly236Gly/c.708C>T	fdrA	EFF=synonymous_variant(LOW|SILENT|ggC/ggT|p.Gly236Gly/c.708C>T|555|fdrA|protein_coding|CODING|ACT38158|1|1),upstream_gene_variant(MODIFIER||970||419|ylbE|protein_coding|CODING|ACT38159||1),upstream_gene_variant(MODIFIER||3341||261|ylbA|protein_coding|CODING|ACT38155||1),upstream_gene_variant(MODIFIER||2336||239|ylbF|protein_coding|CODING|ACT38160||1),upstream_gene_variant(MODIFIER||2095||411|allC…	0	12	COG0074	C	NO	518846	520513	+	C708T	-766.49	-764	2.1e-16	8.37e-17	432.29	457.1	0.5885	0.2221	594-807	0.0878	-0.1032	666-774	0.0564	0.985722	0.978241
521024	C	T	SNP	missense_variant	MODERATE	Cgc/Tgc	p.Arg168Cys/c.502C>T	ylbE	EFF=missense_variant(MODERATE|MISSENSE|Cgc/Tgc|p.Arg168Cys/c.502C>T|419|ylbE|protein_coding|CODING|ACT38159|1|1),upstream_gene_variant(MODIFIER||4812||261|ylbA|protein_coding|CODING|ACT38155||1),upstream_gene_variant(MODIFIER||865||239|ylbF|protein_coding|CODING|ACT38160||1),upstream_gene_variant(MODIFIER||3566||411|allC|protein_coding|CODING|ACT38156||1),upstream_gene_variant(MODIFIER||1581||297…	1	19	NA	NA	NO	520523	521782	+	C502T	-583.07	-583.75	3.39e-14	7.65e-14	419.92	411.04	0.5611	0.0589	429-538	0.4494	0.6081	408-502	0.3527	0.980952	0.982736
524602	G	A	SNP	missense_variant	MODERATE	gCt/gTt	p.Ala34Val/c.101C>T	purK	EFF=missense_variant(MODERATE|MISSENSE|gCt/gTt|p.Ala34Val/c.101C>T|355|purK|protein_coding|CODING|ACT38162|1|1),upstream_gene_variant(MODIFIER||2117||461|cysS|protein_coding|CODING|ACT38166||1),downstream_gene_variant(MODIFIER||97||169|purE|protein_coding|CODING|ACT38163||1),downstream_gene_variant(MODIFIER||724||240|ybbF|protein_coding|CODING|ACT38164||1|WARNING_TRANSCRIPT_NO_START_CODON),downst…	36	60	COG0026	F	NO	523635	524702	-	C101T	-497.57	-496.87	7.06e-12	5.15e-11	158.58	246.35	0.588	0.1046	66-120	0.2792	0.2219	65-115	0.1378	0.906651	0.921188
525467	T	C	SNP	synonymous_variant	LOW	ggA/ggG	p.Gly194Gly/c.582A>G	ybbF	EFF=synonymous_variant(LOW|SILENT|ggA/ggG|p.Gly194Gly/c.582A>G|240|ybbF|protein_coding|CODING|ACT38164|1|1|WARNING_TRANSCRIPT_NO_START_CODON),upstream_gene_variant(MODIFIER||1252||461|cysS|protein_coding|CODING|ACT38166||1),upstream_gene_variant(MODIFIER||765||355|purK|protein_coding|CODING|ACT38162||1),upstream_gene_variant(MODIFIER||259||169|purE|protein_coding|CODING|ACT38163||1),upstream_gene…	55	39	COG2908	S	YES	525326	526048	-	A582G	-295.13	-295.08	1.53e-09	3.28e-10	110.08	252.54	0.5263	0.063	537-718	0.433	0.8054	579-678	0.5398	0.763773	0.819403
530731	T	C	SNP	missense_variant	MODERATE	Ttc/Ctc	p.Phe138Leu/c.412T>C	sfmA	EFF=missense_variant(MODERATE|MISSENSE|Ttc/Ctc|p.Phe138Leu/c.412T>C|180|sfmA|protein_coding|CODING|ACT38170|1|1),upstream_gene_variant(MODIFIER||4683||240|ybbF|protein_coding|CODING|ACT38164||1|WARNING_TRANSCRIPT_NO_START_CODON),upstream_gene_variant(MODIFIER||351||230|sfmC|protein_coding|CODING|ACT38171||1),upstream_gene_variant(MODIFIER||4186||164|ppiB|protein_coding|CODING|ACT38165||1),upstrea…	1	9	COG3539	NU	NO	530320	530862	+	T412C	-187.65	-188.38	1.79e-06	2.11e-06	78.25	62.38	0.4307	0.0029	385-477	0.9272	0.9753	351-411	0.8535	0.993006	0.967241
531146	A	G	SNP	missense_variant	MODERATE	cAt/cGt	p.His22Arg/c.65A>G	sfmC	EFF=missense_variant(MODERATE|MISSENSE|cAt/cGt|p.His22Arg/c.65A>G|230|sfmC|protein_coding|CODING|ACT38171|1|1),upstream_gene_variant(MODIFIER||4601||164|ppiB|protein_coding|CODING|ACT38165||1),upstream_gene_variant(MODIFIER||659||869|sfmD|protein_coding|CODING|ACT38172||1),upstream_gene_variant(MODIFIER||2485||173|ybcI|protein_coding|CODING|ACT38167||1),upstream_gene_variant(MODIFIER||2165||70|yb…	0	22	COG3121	NU	NO	531082	531774	+	A65G	-229.03	-229.03	1.06e-07	6.58e-08	145.85	151.54	0.4113	0	46-95	1	1	26-259	0.9993	0.99668	0.993555
534917	A	G	SNP	synonymous_variant	LOW	agA/agG	p.Arg154Arg/c.462A>G	sfmH	EFF=synonymous_variant(LOW|SILENT|agA/agG|p.Arg154Arg/c.462A>G|325|sfmH|protein_coding|CODING|ACT38173|1|1),upstream_gene_variant(MODIFIER||527||171|sfmF|protein_coding|CODING|ACT38174||1),upstream_gene_variant(MODIFIER||1920|||argU|tRNA|NON_CODING|ECB_t00007||1),downstream_gene_variant(MODIFIER||4055||180|sfmA|protein_coding|CODING|ACT38170||1),downstream_gene_variant(MODIFIER||1045||210|fimZ|pr…	1	38	COG3539	NU	NO	534456	535433	+	A462G	-362.18	-362.18	9.29e-11	3.65e-11	155.58	148.08	0.4464	0.003	443-497	0.9214	0.9952	443-583	0.9433	0.999978	0.999548
535504	G	A	SNP	missense_variant	MODERATE	Gct/Act	p.Ala21Thr/c.61G>A	sfmF	EFF=missense_variant(MODERATE|MISSENSE|Gct/Act|p.Ala21Thr/c.61G>A|171|sfmF|protein_coding|CODING|ACT38174|1|1),upstream_gene_variant(MODIFIER||1333|||argU|tRNA|NON_CODING|ECB_t00007||1),upstream_gene_variant(MODIFIER||4448||61|renD|protein_coding|CODING|ACT38181||1),upstream_gene_variant(MODIFIER||4701||110|emrE|protein_coding|CODING|ACT38182||1),downstream_gene_variant(MODIFIER||4642||180|sfmA|p…	0	22	COG3539	NU	NO	535444	535959	+	G61A	-187.53	-187.61	3.36e-07	3.52e-07	124.28	112.33	0.4866	0.0006	18-67	0.9822	0.9992	11-142	0.9836	0.999993	0.999693
536615	C	T	SNP	upstream_gene_variant	MODIFIER	.	.	.	EFF=upstream_gene_variant(MODIFIER||222|||argU|tRNA|NON_CODING|ECB_t00007||1),upstream_gene_variant(MODIFIER||3337||61|renD|protein_coding|CODING|ACT38181||1),upstream_gene_variant(MODIFIER||3590||110|emrE|protein_coding|CODING|ACT38182||1),upstream_gene_variant(MODIFIER||4177||508|ybcK|protein_coding|CODING|ACT38183||1),upstream_gene_variant(MODIFIER||21||210|fimZ|protein_coding|CODING|ACT38175|…	.	.	NA	NA	.	.	.	.	.	.	.	.	.	.	.	.	.	.	.	.	.	.	.	.
539111	G	A	SNP	synonymous_variant	LOW	gcC/gcT	p.Ala46Ala/c.138C>T	ECB_00489	EFF=synonymous_variant(LOW|SILENT|gcC/gcT|p.Ala46Ala/c.138C>T|104|ECB_00489|protein_coding|CODING|ACT38179|1|1),upstream_gene_variant(MODIFIER||841||61|renD|protein_coding|CODING|ACT38181||1),upstream_gene_variant(MODIFIER||1094||110|emrE|protein_coding|CODING|ACT38182||1),upstream_gene_variant(MODIFIER||1681||508|ybcK|protein_coding|CODING|ACT38183||1),upstream_gene_variant(MODIFIER||2517||210|f…	NA	NA	NA	NA	NO	538934	539248	-	C138T	-108	-106.47	0.00124813	0.000481543	51.34	83.48	0.5048	0.065	21-70	0.4178	0.7371	23-72	0.4599	0.947026	0.888569
543928	A	G	SNP	synonymous_variant	LOW	ttA/ttG	p.Leu195Leu/c.585A>G	ybcM	EFF=synonymous_variant(LOW|SILENT|ttA/ttG|p.Leu195Leu/c.585A>G|265|ybcM|protein_coding|CODING|ACT38185|1|1),upstream_gene_variant(MODIFIER||4680||104|ECB_00489|protein_coding|CODING|ACT38179||1),upstream_gene_variant(MODIFIER||428||151|ybcN|protein_coding|CODING|ACT38186||1|WARNING_TRANSCRIPT_NO_START_CODON),upstream_gene_variant(MODIFIER||4337||121|ECB_00490|protein_coding|CODING|ACT38180||1),up…	11	68	COG2207	K	NO	543344	544141	+	A585G	-230.18	-229.41	1.97e-08	1.06e-08	147.8	149.2	0.3815	0.0261	583-640	0.5961	0.9327	583-640	0.7288	0.990873	0.898725
545142	T	C	SNP	missense_variant	MODERATE	Tgt/Cgt	p.Cys57Arg/c.169T>C	ybcO	EFF=missense_variant(MODERATE|MISSENSE|Tgt/Cgt|p.Cys57Arg/c.169T>C|96|ybcO|protein_coding|CODING|ACT38188|1|1),upstream_gene_variant(MODIFIER||119||120|rus|protein_coding|CODING|ACT38189||1|WARNING_TRANSCRIPT_NO_START_CODON),upstream_gene_variant(MODIFIER||478||46|ylcG|protein_coding|CODING|ACT38190||1),upstream_gene_variant(MODIFIER||704||127|ybcQ|protein_coding|CODING|ACT38191||1),upstream_gene…	0	17	NA	NA	NO	544974	545264	+	T169C	-114.65	-114.65	0.000188896	0.00015106	51.73	35.56	0.5258	0.008	163-212	0.8577	0.9579	166-279	0.8061	0.983939	0.966201
593933	A	G	SNP	synonymous_variant	LOW	cgT/cgC	p.Arg423Arg/c.1269T>C	fepA	EFF=synonymous_variant(LOW|SILENT|cgT/cgC|p.Arg423Arg/c.1269T>C|746|fepA|protein_coding|CODING|ACT38236|1|1),upstream_gene_variant(MODIFIER||3860||167|insB-7|protein_coding|CODING|ACT38231||1),upstream_gene_variant(MODIFIER||3666||91|insA-7|protein_coding|CODING|ACT38232||1|WARNING_TRANSCRIPT_NO_START_CODON),upstream_gene_variant(MODIFIER||1590||374|fes|protein_coding|CODING|ACT38237||1),upstream…	6	17	COG4771	P	NO	592961	595201	-	G1104A-T1269C	-927.84	-925.04	5.19e-24	2.26e-24	300.68	307.99	0.53	0.101	1346-1401	0.2844	-0.1641	1346-1401	0.0459	0.975836	0.955093
594098	C	T	SNP	missense_variant	MODERATE	atG/atA	p.Met368Ile/c.1104G>A	fepA	EFF=missense_variant(MODERATE|MISSENSE|atG/atA|p.Met368Ile/c.1104G>A|746|fepA|protein_coding|CODING|ACT38236|1|1),upstream_gene_variant(MODIFIER||4025||167|insB-7|protein_coding|CODING|ACT38231||1),upstream_gene_variant(MODIFIER||3831||91|insA-7|protein_coding|CODING|ACT38232||1|WARNING_TRANSCRIPT_NO_START_CODON),upstream_gene_variant(MODIFIER||1425||374|fes|protein_coding|CODING|ACT38237||1),ups…	6	17	COG4771	P	NO	592961	595201	-	G1104A-T1269C	-927.84	-925.04	5.19e-24	2.26e-24	300.68	307.99	0.53	0.101	1346-1401	0.2844	-0.1641	1346-1401	0.0459	0.975836	0.955093
595288	T	C	SNP	upstream_gene_variant	MODIFIER	.	.	.	EFF=upstream_gene_variant(MODIFIER||235||374|fes|protein_coding|CODING|ACT38237||1),upstream_gene_variant(MODIFIER||1362||72|ybdZ|protein_coding|CODING|ACT38238||1),upstream_gene_variant(MODIFIER||1577||1293|entF|protein_coding|CODING|ACT38239||1),upstream_gene_variant(MODIFIER||2493||209|entD|protein_coding|CODING|ACT38235||1),upstream_gene_variant(MODIFIER||87||746|fepA|protein_coding|CODING|AC…	.	.	NA	NA	.	.	.	.	.	.	.	.	.	.	.	.	.	.	.	.	.	.	.	.
596115	T	C	SNP	missense_variant	MODERATE	cTt/cCt	p.Leu198Pro/c.593T>C	fes	EFF=missense_variant(MODERATE|MISSENSE|cTt/cCt|p.Leu198Pro/c.593T>C|374|fes|protein_coding|CODING|ACT38237|1|1),upstream_gene_variant(MODIFIER||535||72|ybdZ|protein_coding|CODING|ACT38238||1),upstream_gene_variant(MODIFIER||750||1293|entF|protein_coding|CODING|ACT38239||1),upstream_gene_variant(MODIFIER||3320||209|entD|protein_coding|CODING|ACT38235||1),upstream_gene_variant(MODIFIER||914||746|fe…	14	26	COG2382	P	NO	595523	596647	+	T593C	-459.13	-458.67	3.34e-11	2.1e-11	465.6	490.32	0.5486	0.0057	467-596	0.8926	0.9589	496-589	0.8125	0.993129	0.993877
597401	A	G	SNP	synonymous_variant	LOW	gaA/gaG	p.Glu179Glu/c.537A>G	entF	EFF=synonymous_variant(LOW|SILENT|gaA/gaG|p.Glu179Glu/c.537A>G|1293|entF|protein_coding|CODING|ACT38239|1|1),upstream_gene_variant(MODIFIER||4606||209|entD|protein_coding|CODING|ACT38235||1),upstream_gene_variant(MODIFIER||2200||746|fepA|protein_coding|CODING|ACT38236||1),upstream_gene_variant(MODIFIER||3561||377|fepE|protein_coding|CODING|ACT38240||1),downstream_gene_variant(MODIFIER||754||374|f…	15	24	COG1020	Q	NO	596865	600746	+	A537G-C1589T	-1822.44	-1822.08	4.1e-37	1.84e-37	1041.59	1048.75	0.5657	0.125	1562-1632	0.2224	0.3604	1572-1630	0.2014	0.982546
598453	C	T	SNP	missense_variant	MODERATE	gCg/gTg	p.Ala530Val/c.1589C>T	entF	EFF=missense_variant(MODERATE|MISSENSE|gCg/gTg|p.Ala530Val/c.1589C>T|1293|entF|protein_coding|CODING|ACT38239|1|1),upstream_gene_variant(MODIFIER||3252||746|fepA|protein_coding|CODING|ACT38236||1),upstream_gene_variant(MODIFIER||2509||377|fepE|protein_coding|CODING|ACT38240||1),downstream_gene_variant(MODIFIER||1806||374|fes|protein_coding|CODING|ACT38237||1),downstream_gene_variant(MODIFIER||158…	15	24	COG1020	Q	NO	596865	600746	+	A537G-C1589T	-1822.44	-1822.08	4.1e-37	1.84e-37	1041.59	1048.75	0.5657	0.125	1562-1632	0.2224	0.3604	1572-1630	0.2014	0.982546
601755	A	G	SNP	missense_variant	MODERATE	gAt/gGt	p.Asp265Gly/c.794A>G	fepE	EFF=missense_variant(MODERATE|MISSENSE|gAt/gGt|p.Asp265Gly/c.794A>G|377|fepE|protein_coding|CODING|ACT38240|1|1),upstream_gene_variant(MODIFIER||3253||416|ybdA|protein_coding|CODING|ACT38244||1),downstream_gene_variant(MODIFIER||4887||72|ybdZ|protein_coding|CODING|ACT38238||1),downstream_gene_variant(MODIFIER||337||271|fepC|protein_coding|CODING|ACT38241||1),downstream_gene_variant(MODIFIER||1149…	1	16	COG3765	M	NO	600962	602095	+	A794G	-399.09	-402.32	4.96e-13	3.89e-13	149.56	149.06	0.419	0.0172	792-867	0.7072	0.9242	794-866	0.7111	0.970937	0.911369
602272	G	A	SNP	synonymous_variant	LOW	agC/agT	p.Ser212Ser/c.636C>T	fepC	EFF=synonymous_variant(LOW|SILENT|agC/agT|p.Ser212Ser/c.636C>T|271|fepC|protein_coding|CODING|ACT38241|1|1),upstream_gene_variant(MODIFIER||2736||416|ybdA|protein_coding|CODING|ACT38244||1),downstream_gene_variant(MODIFIER||632||330|fepG|protein_coding|CODING|ACT38242||1),downstream_gene_variant(MODIFIER||1621||334|fepD|protein_coding|CODING|ACT38243||1),downstream_gene_variant(MODIFIER||1526||12…	45	35	COG1120	PH	NO	602092	602907	-	C636T	-322.57	-327.97	1.98e-09	4.63e-08	279.31	109.1	0.5407	0.2119	610-659	0.0863	0.1709	609-658	0.1169	0.938775	0.806472
603390	C	T	SNP	synonymous_variant	LOW	gcG/gcA	p.Ala169Ala/c.507G>A	fepG	EFF=synonymous_variant(LOW|SILENT|gcG/gcA|p.Ala169Ala/c.507G>A|330|fepG|protein_coding|CODING|ACT38242|1|1),upstream_gene_variant(MODIFIER||1618||416|ybdA|protein_coding|CODING|ACT38244||1),upstream_gene_variant(MODIFIER||4203||391|entC|protein_coding|CODING|ACT38246||1),upstream_gene_variant(MODIFIER||483||271|fepC|protein_coding|CODING|ACT38241||1),downstream_gene_variant(MODIFIER||503||334|fep…	25	17	COG4779	P	NO	602904	603896	-	G507A	-492.7	-491.28	6.36e-12	6.59e-11	275.07	300.63	0.5835	0.3115	485-534	0.0395	-0.2099	485-534	0.0389	0.932153	0.946896
607324	A	G	SNP	upstream_gene_variant	MODIFIER	.	.	.	EFF=upstream_gene_variant(MODIFIER||269||391|entC|protein_coding|CODING|ACT38246||1),upstream_gene_variant(MODIFIER||4417||271|fepC|protein_coding|CODING|ACT38241||1),upstream_gene_variant(MODIFIER||1454||536|entE|protein_coding|CODING|ACT38247||1),upstream_gene_variant(MODIFIER||3428||330|fepG|protein_coding|CODING|ACT38242||1),upstream_gene_variant(MODIFIER||2427||334|fepD|protein_coding|CODING…	.	.	NA	NA	.	.	.	.	.	.	.	.	.	.	.	.	.	.	.	.	.	.	.	.
608677	C	T	SNP	missense_variant	MODERATE	gCg/gTg	p.Ala362Val/c.1085C>T	entC	EFF=missense_variant(MODERATE|MISSENSE|gCg/gTg|p.Ala362Val/c.1085C>T|391|entC|protein_coding|CODING|ACT38246|1|1),upstream_gene_variant(MODIFIER||101||536|entE|protein_coding|CODING|ACT38247||1),upstream_gene_variant(MODIFIER||4781||330|fepG|protein_coding|CODING|ACT38242||1),upstream_gene_variant(MODIFIER||3780||334|fepD|protein_coding|CODING|ACT38243||1),upstream_gene_variant(MODIFIER||1725||28…	54	37	COG1169	HQ	NO	607593	608768	+	C1085T	-509	-506.9	4.35e-12	3.73e-12	228.87	231.6	0.5788	0.0032	902-1089	0.9337	0.9818	906-1000	0.8823	0.999758	0.997702
610876	A	G	SNP	missense_variant	MODERATE	Acc/Gcc	p.Thr159Ala/c.475A>G	entB	EFF=missense_variant(MODERATE|MISSENSE|Acc/Gcc|p.Thr159Ala/c.475A>G|285|entB|protein_coding|CODING|ACT38248|1|1),upstream_gene_variant(MODIFIER||383||248|entA|protein_coding|CODING|ACT38249||1),upstream_gene_variant(MODIFIER||1132||137|ybdB|protein_coding|CODING|ACT38250||1),upstream_gene_variant(MODIFIER||3658||318|fepB|protein_coding|CODING|ACT38245||1|WARNING_TRANSCRIPT_NO_START_CODON),upstrea…	22	21	COG1535	Q	NO	610402	611259	+	A475G	-355.66	-356.49	6.68e-12	5.01e-12	217.25	218.61	0.5661	0.0139	464-513	0.788	0.895	467-521	0.6773	0.992701	0.994754
611841	C	T	SNP	missense_variant	MODERATE	Cgt/Tgt	p.Arg195Cys/c.583C>T	entA	EFF=missense_variant(MODERATE|MISSENSE|Cgt/Tgt|p.Arg195Cys/c.583C>T|248|entA|protein_coding|CODING|ACT38249|1|1),upstream_gene_variant(MODIFIER||167||137|ybdB|protein_coding|CODING|ACT38250||1),upstream_gene_variant(MODIFIER||4623||318|fepB|protein_coding|CODING|ACT38245||1|WARNING_TRANSCRIPT_NO_START_CODON),upstream_gene_variant(MODIFIER||3038||65|ybdD|protein_coding|CODING|ACT38251||1),upstream…	12	16	COG1028	IQR	NO	611259	612005	+	C583T	-338.81	-336.71	6.53e-09	6.48e-09	119.15	128.85	0.5945	0	560-609	0.9995	1	560-610	0.9976	0.999967	0.999083
615264	C	T	SNP	missense_variant	MODERATE	cGt/cAt	p.Arg304His/c.911G>A	ybdH	EFF=missense_variant(MODERATE|MISSENSE|cGt/cAt|p.Arg304His/c.911G>A|362|ybdH|protein_coding|CODING|ACT38252|1|1),upstream_gene_variant(MODIFIER||1019||386|ybdL|protein_coding|CODING|ACT38253||1),downstream_gene_variant(MODIFIER||4876||536|entE|protein_coding|CODING|ACT38247||1),downstream_gene_variant(MODIFIER||4005||285|entB|protein_coding|CODING|ACT38248||1),downstream_gene_variant(MODIFIER||32…	32	87	COG0371	C	NO	615086	616174	-	G911A	-464.49	-467.56	5.05e-13	1.67e-12	277.5	255.66	0.5462	0.1044	875-947	0.2605	0.4496	884-951	0.2352	0.979816	0.876866
617896	G	A	SNP	missense_variant	MODERATE	Ccg/Tcg	p.Pro60Ser/c.178C>T	ybdM	EFF=missense_variant(MODERATE|MISSENSE|Ccg/Tcg|p.Pro60Ser/c.178C>T|209|ybdM|protein_coding|CODING|ACT38254|1|1),upstream_gene_variant(MODIFIER||3100||187|ahpC|protein_coding|CODING|ACT38259||1),upstream_gene_variant(MODIFIER||1722||362|ybdH|protein_coding|CODING|ACT38252||1),upstream_gene_variant(MODIFIER||3908||521|ahpF|protein_coding|CODING|ACT38260||1),downstream_gene_variant(MODIFIER||150||35…	2	36	COG1475	K	NO	617444	618073	-	C178T	-207.1	-204.22	1.56e-06	1.04e-06	42.17	74.79	0.4339	0.1266	165-214	0.1821	0.23	155-205	0.1275	0.93512	0.741544
623755	A	G	SNP	missense_variant	MODERATE	gTg/gCg	p.Val55Ala/c.164T>C	ybdQ	EFF=missense_variant(MODERATE|MISSENSE|gTg/gCg|p.Val55Ala/c.164T>C|142|ybdQ|protein_coding|CODING|ACT38261|1|1),upstream_gene_variant(MODIFIER||4648||353|ybdN|protein_coding|CODING|ACT38255||1),upstream_gene_variant(MODIFIER||384||412|ybdR|protein_coding|CODING|ACT38262||1),upstream_gene_variant(MODIFIER||4120||167|insB-8|protein_coding|CODING|ACT38256||1),upstream_gene_variant(MODIFIER||3926||91…	93	120	COG0589	T	NO	623490	623918	-	T164C	-147.36	-145.36	5.26e-06	2.34e-06	49.13	42.15	0.4835	0.2769	162-211	0.0375	-0.0001	162-211	0.0673	0.922675	0.924153
627975	A	G	SNP	synonymous_variant	LOW	ggT/ggC	p.Gly219Gly/c.657T>C	citT	EFF=synonymous_variant(LOW|SILENT|ggT/ggC|p.Gly219Gly/c.657T>C|487|citT|protein_coding|CODING|ACT38265|1|1),upstream_gene_variant(MODIFIER||4057||142|ybdQ|protein_coding|CODING|ACT38261||1),upstream_gene_variant(MODIFIER||1957||136|rnk|protein_coding|CODING|ACT38263||1),upstream_gene_variant(MODIFIER||921||268|rna|protein_coding|CODING|ACT38264||1),downstream_gene_variant(MODIFIER||4606||521|ahpF…	0	17	COG0471	P	NO	627168	628631	-	A278G-T657C	-594.79	-594.37	4.32e-17	2.03e-17	382.1	382.54	0.5128	0.0629	555-693	0.4294	0.5777	566-693	0.3299	0.999704	0.998351
628354	T	C	SNP	missense_variant	MODERATE	aAa/aGa	p.Lys93Arg/c.278A>G	citT	EFF=missense_variant(MODERATE|MISSENSE|aAa/aGa|p.Lys93Arg/c.278A>G|487|citT|protein_coding|CODING|ACT38265|1|1),upstream_gene_variant(MODIFIER||4436||142|ybdQ|protein_coding|CODING|ACT38261||1),upstream_gene_variant(MODIFIER||2336||136|rnk|protein_coding|CODING|ACT38263||1),upstream_gene_variant(MODIFIER||1300||268|rna|protein_coding|CODING|ACT38264||1),downstream_gene_variant(MODIFIER||4985||521…	0	17	COG0471	P	NO	627168	628631	-	A278G-T657C	-594.79	-594.37	4.32e-17	2.03e-17	382.1	382.54	0.5128	0.0629	555-693	0.4294	0.5777	566-693	0.3299	0.999704	0.998351
630767	T	G	SNP	missense_variant	MODERATE	Acc/Ccc	p.Thr286Pro/c.856A>C	citF	EFF=missense_variant(MODERATE|MISSENSE|Acc/Ccc|p.Thr286Pro/c.856A>C|510|citF|protein_coding|CODING|ACT38268|1|1),upstream_gene_variant(MODIFIER||4749||136|rnk|protein_coding|CODING|ACT38263||1),upstream_gene_variant(MODIFIER||3713||268|rna|protein_coding|CODING|ACT38264||1),upstream_gene_variant(MODIFIER||2136||487|citT|protein_coding|CODING|ACT38265||1),upstream_gene_variant(MODIFIER||1207||292|…	0	11	COG3051	C	NO	630090	631622	-	G797A-A856C	-669.07	-665.89	1.55e-16	1.64e-16	279.51	345.2	0.5478	0.332	679-798	0.0331	-0.1798	692-746	0.0434	0.895195	0.833437
630826	C	T	SNP	missense_variant	MODERATE	gGc/gAc	p.Gly266Asp/c.797G>A	citF	EFF=missense_variant(MODERATE|MISSENSE|gGc/gAc|p.Gly266Asp/c.797G>A|510|citF|protein_coding|CODING|ACT38268|1|1),upstream_gene_variant(MODIFIER||4808||136|rnk|protein_coding|CODING|ACT38263||1),upstream_gene_variant(MODIFIER||3772||268|rna|protein_coding|CODING|ACT38264||1),upstream_gene_variant(MODIFIER||2195||487|citT|protein_coding|CODING|ACT38265||1),upstream_gene_variant(MODIFIER||1266||292|…	0	11	COG3051	C	NO	630090	631622	-	G797A-A856C	-669.07	-665.89	1.55e-16	1.64e-16	279.51	345.2	0.5478	0.332	679-798	0.0331	-0.1798	692-746	0.0434	0.895195	0.833437
637833	C	T	SNP	missense_variant	MODERATE	Gct/Act	p.Ala242Thr/c.724G>A	dcuC	EFF=missense_variant(MODERATE|MISSENSE|Gct/Act|p.Ala242Thr/c.724G>A|461|dcuC|protein_coding|CODING|ACT38276|1|1),upstream_gene_variant(MODIFIER||4999||98|citD|protein_coding|CODING|ACT38270||1),upstream_gene_variant(MODIFIER||3926||352|citC|protein_coding|CODING|ACT38271||1),upstream_gene_variant(MODIFIER||1311||186|crcA|protein_coding|CODING|ACT38277||1),upstream_gene_variant(MODIFIER||3337||167…	2	23	COG3069	C	NO	637171	638556	-	G724A	-588.12	-584.62	3.21e-15	2.56e-15	224.16	243.07	0.4813	0.0824	681-739	0.2814	0.6229	675-730	0.3294	0.985543	0.959306
640122	G	GT	INS	upstream_gene_variant	MODIFIER	.	.	.	EFF=upstream_gene_variant(MODIFIER||490||262|ybeM|protein_coding|CODING|ACT38280||1),upstream_gene_variant(MODIFIER||1407||67|tatE|protein_coding|CODING|ACT38281||1),upstream_gene_variant(MODIFIER||1567||461|dcuC|protein_coding|CODING|ACT38276||1),downstream_gene_variant(MODIFIER||14||127|ccrB|protein_coding|CODING|ACT38279||1|WARNING_TRANSCRIPT_NO_START_CODON),downstream_gene_variant(MODIFIER||3…	.	.	NA	NA	.	.	.	.	.	.	.	.	.	.	.	.	.	.	.	.	.	.	.	.
651962	C	T	SNP	missense_variant	MODERATE	tGt/tAt	p.Cys177Tyr/c.530G>A	phpB	EFF=missense_variant(MODERATE|MISSENSE|tGt/tAt|p.Cys177Tyr/c.530G>A|203|phpB|protein_coding|CODING|ACT38292|1|1),upstream_gene_variant(MODIFIER||4188||362|rlpA|protein_coding|CODING|ACT38287||1),upstream_gene_variant(MODIFIER||3065||370|mrdB|protein_coding|CODING|ACT38288||1),upstream_gene_variant(MODIFIER||1161||633|mrdA|protein_coding|CODING|ACT38289||1),upstream_gene_variant(MODIFIER||663||155…	31	44	COG0406	G	NO	651880	652491	-	G530A	-224.44	-221.62	3.21e-08	6.02e-08	152.26	145.56	0.4912	0.0523	508-607	0.4558	0.8594	517-580	0.6145	0.990144	0.974421
654043	T	C	SNP	synonymous_variant	LOW	gaA/gaG	p.Glu49Glu/c.147A>G	holA	EFF=synonymous_variant(LOW|SILENT|gaA/gaG|p.Glu49Glu/c.147A>G|343|holA|protein_coding|CODING|ACT38294|1|1),upstream_gene_variant(MODIFIER||3242||633|mrdA|protein_coding|CODING|ACT38289||1),upstream_gene_variant(MODIFIER||2744||155|ybeA|protein_coding|CODING|ACT38290||1|WARNING_TRANSCRIPT_NO_START_CODON),upstream_gene_variant(MODIFIER||2423||105|ybeB|protein_coding|CODING|ACT38291||1),upstream_gen…	119	59	COG1466	L	YES	653158	654189	-	A147G	-429.41	-433.79	3.45e-13	9.77e-13	151.34	146.39	0.5043	0.0489	142-206	0.5185	0.9655	142-206	0.8367	0.954266	0.845551
655217	G	A	SNP	synonymous_variant	LOW	ggC/ggT	p.Gly717Gly/c.2151C>T	leuS	EFF=synonymous_variant(LOW|SILENT|ggC/ggT|p.Gly717Gly/c.2151C>T|860|leuS|protein_coding|CODING|ACT38296|1|1),upstream_gene_variant(MODIFIER||4416||633|mrdA|protein_coding|CODING|ACT38289||1),upstream_gene_variant(MODIFIER||3918||155|ybeA|protein_coding|CODING|ACT38290||1|WARNING_TRANSCRIPT_NO_START_CODON),upstream_gene_variant(MODIFIER||3597||105|ybeB|protein_coding|CODING|ACT38291||1),upstream_g…	391	166	COG0495	J	YES	654785	657367	-	C2151T	-1074.07	-1079.17	1.86e-27	4.25e-27	515.75	497.37	0.5411	0.0588	2104-2153	0.45	0.7827	2109-2158	0.5185	0.993592	0.97422
661204	C	T	SNP	missense_variant	MODERATE	Cgt/Tgt	p.Arg299Cys/c.895C>T	ybeV	EFF=missense_variant(MODERATE|MISSENSE|Cgt/Tgt|p.Arg299Cys/c.895C>T|379|ybeV|protein_coding|CODING|ACT38299|1|1),upstream_gene_variant(MODIFIER||3837||860|leuS|protein_coding|CODING|ACT38296||1),upstream_gene_variant(MODIFIER||3531||173|insJ-2|protein_coding|CODING|ACT38302||1),upstream_gene_variant(MODIFIER||4049||283|insK-2|protein_coding|CODING|ACT38303||1|WARNING_TRANSCRIPT_NO_START_CODON),do…	5	29	NA	NA	NO	660310	661449	+	C895T	-432.56	-432.65	1.03e-12	9.71e-13	153.25	160.89	0.4638	0.0551	843-920	0.4034	0.7187	1012-1061	0.4157	0.960359	0.904627
666342	C	T	SNP	upstream_gene_variant	MODIFIER	.	.	.	EFF=upstream_gene_variant(MODIFIER||3163||556|hscC|protein_coding|CODING|ACT38300||1),upstream_gene_variant(MODIFIER||2144||311|rihA|protein_coding|CODING|ACT38301||1),upstream_gene_variant(MODIFIER||3092||625|ECB_00624|protein_coding|CODING|ACT38307||1),downstream_gene_variant(MODIFIER||4893||379|ybeV|protein_coding|CODING|ACT38299||1),downstream_gene_variant(MODIFIER||145||224|gltK|protein_codi…	.	.	NA	NA	.	.	.	.	.	.	.	.	.	.	.	.	.	.	.	.	.	.	.	.
667369	T	C	SNP	missense_variant	MODERATE	aAc/aGc	p.Asn178Ser/c.533A>G	gltJ	EFF=missense_variant(MODERATE|MISSENSE|aAc/aGc|p.Asn178Ser/c.533A>G|246|gltJ|protein_coding|CODING|ACT38305|1|1),upstream_gene_variant(MODIFIER||4190||556|hscC|protein_coding|CODING|ACT38300||1),upstream_gene_variant(MODIFIER||3171||311|rihA|protein_coding|CODING|ACT38301||1),upstream_gene_variant(MODIFIER||2065||625|ECB_00624|protein_coding|CODING|ACT38307||1),upstream_gene_variant(MODIFIER||208…	13	47	COG0765	E	NO	667161	667901	-	A533G	-317.13	-319.73	7.69e-08	6.52e-08	151.28	157.58	0.5761	0.1234	490-539	0.2261	0.1012	490-539	0.1042	0.949409	0.79507
673141	A	G	SNP	missense_variant	MODERATE	Ttt/Ctt	p.Phe247Leu/c.739T>C	ybeX	EFF=missense_variant(MODERATE|MISSENSE|Ttt/Ctt|p.Phe247Leu/c.739T>C|292|ybeX|protein_coding|CODING|ACT38309|1|1),upstream_gene_variant(MODIFIER||4162||302|gltI|protein_coding|CODING|ACT38306||1),upstream_gene_variant(MODIFIER||4055||391|ubiF|protein_coding|CODING|ACT38313||1),upstream_gene_variant(MODIFIER||165||512|lnt|protein_coding|CODING|ACT38308||1),downstream_gene_variant(MODIFIER||828||155…	300	245	COG4535	P	NO	673001	673879	-	T739C	-337.42	-339.44	1.14e-10	1.46e-10	160.9	154.07	0.5161	0.0407	720-769	0.5533	0.9053	720-769	0.6836	0.993529	0.97911
674636	T	C	SNP	missense_variant	MODERATE	Act/Gct	p.Thr293Ala/c.877A>G	ybeZ	EFF=missense_variant(MODERATE|MISSENSE|Act/Gct|p.Thr293Ala/c.877A>G|359|ybeZ|protein_coding|CODING|ACT38311|1|1),upstream_gene_variant(MODIFIER||2560||391|ubiF|protein_coding|CODING|ACT38313||1),upstream_gene_variant(MODIFIER||1660||512|lnt|protein_coding|CODING|ACT38308||1),upstream_gene_variant(MODIFIER||757||292|ybeX|protein_coding|CODING|ACT38309||1),upstream_gene_variant(MODIFIER||200||155|y…	241	192	COG1702	T	NO	674433	675512	-	A877G	-435.7	-438.87	1.9e-11	6.24e-11	267.48	201.15	0.5162	0.0745	865-914	0.3778	0.8199	856-905	0.5647	0.974435	0.958695
676010	G	A	SNP	synonymous_variant	LOW	gcC/gcT	p.Ala347Ala/c.1041C>T	yleA	EFF=synonymous_variant(LOW|SILENT|gcC/gcT|p.Ala347Ala/c.1041C>T|474|yleA|protein_coding|CODING|ACT38312|1|1),upstream_gene_variant(MODIFIER||1186||391|ubiF|protein_coding|CODING|ACT38313||1),upstream_gene_variant(MODIFIER||3034||512|lnt|protein_coding|CODING|ACT38308||1),upstream_gene_variant(MODIFIER||2131||292|ybeX|protein_coding|CODING|ACT38309||1),upstream_gene_variant(MODIFIER||1574||155|ybe…	197	61	COG0621	J	NO	675626	677050	-	C1041T	-604.76	-604.3	1.58e-14	1.36e-14	169.56	171.6	0.5312	0.0222	1015-1064	0.7031	0.9636	1017-1066	0.8255	0.997644	0.988343
677088	G	A	SNP	upstream_gene_variant	MODIFIER	.	.	.	EFF=upstream_gene_variant(MODIFIER||108||391|ubiF|protein_coding|CODING|ACT38313||1),upstream_gene_variant(MODIFIER||4112||512|lnt|protein_coding|CODING|ACT38308||1),upstream_gene_variant(MODIFIER||3209||292|ybeX|protein_coding|CODING|ACT38309||1),upstream_gene_variant(MODIFIER||2652||155|ybeY|protein_coding|CODING|ACT38310||1),upstream_gene_variant(MODIFIER||1576||359|ybeZ|protein_coding|CODING|…	.	.	NA	NA	.	.	.	.	.	.	.	.	.	.	.	.	.	.	.	.	.	.	.	.
680722	T	C	SNP	missense_variant	MODERATE	cAg/cGg	p.Gln184Arg/c.551A>G	asnB	EFF=missense_variant(MODERATE|MISSENSE|cAg/cGg|p.Gln184Arg/c.551A>G|554|asnB|protein_coding|CODING|ACT38314|1|1),upstream_gene_variant(MODIFIER||3672||474|yleA|protein_coding|CODING|ACT38312||1),upstream_gene_variant(MODIFIER||2123|||glnX|tRNA|NON_CODING|ECB_t00008||1),upstream_gene_variant(MODIFIER||2011|||glnV|tRNA|NON_CODING|ECB_t00009||1),upstream_gene_variant(MODIFIER||1887|||metU|tRNA|NON_C…	40	97	COG0367	E	NO	679608	681272	-	A551G	-675.35	-674.93	3.76e-18	2.47e-18	357.99	363.15	0.5012	0.0214	543-594	0.7106	0.8161	543-607	0.5596	0.993861	0.991357
682876	C	T	SNP	missense_variant	MODERATE	Gct/Act	p.Ala272Thr/c.814G>A	nagC	EFF=missense_variant(MODERATE|MISSENSE|Gct/Act|p.Ala272Thr/c.814G>A|406|nagC|protein_coding|CODING|ACT38316|1|1),upstream_gene_variant(MODIFIER||4277|||glnX|tRNA|NON_CODING|ECB_t00008||1),upstream_gene_variant(MODIFIER||4165|||glnV|tRNA|NON_CODING|ECB_t00009||1),upstream_gene_variant(MODIFIER||4041|||metU|tRNA|NON_CODING|ECB_t00010||1),upstream_gene_variant(MODIFIER||3951|||glnW|tRNA|NON_CODING|E…	126	71	COG1940	KG	NO	682469	683689	-	G814A	-494.09	-493.14	8.49e-13	6.49e-12	411.77	401.72	0.5287	0.1001	800-926	0.2871	0.5574	785-863	0.3154	0.972776	0.962809
686537	G	A	SNP	missense_variant	MODERATE	Gtt/Att	p.Val167Ile/c.499G>A	nagE	EFF=missense_variant(MODERATE|MISSENSE|Gtt/Att|p.Val167Ile/c.499G>A|648|nagE|protein_coding|CODING|ACT38319|1|1),upstream_gene_variant(MODIFIER||4116||250|nagD|protein_coding|CODING|ACT38315||1),upstream_gene_variant(MODIFIER||1651||554|glnS|protein_coding|CODING|ACT38320||1),upstream_gene_variant(MODIFIER||2848||406|nagC|protein_coding|CODING|ACT38316||1),upstream_gene_variant(MODIFIER||1691||38…	98	121	COG1263	G	NO	686039	687985	+	G499A-C1589T	-886.16	-882.63	1.25e-21	8.76e-22	298.43	626.88	0.5594	0.0566	1580-1629	0.4612	0.7036	564-617	0.4349	0.984434
687627	C	T	SNP	missense_variant	MODERATE	gCg/gTg	p.Ala530Val/c.1589C>T	nagE	EFF=missense_variant(MODERATE|MISSENSE|gCg/gTg|p.Ala530Val/c.1589C>T|648|nagE|protein_coding|CODING|ACT38319|1|1),upstream_gene_variant(MODIFIER||561||554|glnS|protein_coding|CODING|ACT38320||1),upstream_gene_variant(MODIFIER||3938||406|nagC|protein_coding|CODING|ACT38316||1),upstream_gene_variant(MODIFIER||2781||382|nagA|protein_coding|CODING|ACT38317||1),upstream_gene_variant(MODIFIER||2802||46…	98	121	COG1263	G	NO	686039	687985	+	G499A-C1589T	-886.16	-882.63	1.25e-21	8.76e-22	298.43	626.88	0.5594	0.0566	1580-1629	0.4612	0.7036	564-617	0.4349	0.984434
688703	C	T	SNP	synonymous_variant	LOW	tgC/tgT	p.Cys172Cys/c.516C>T	glnS	EFF=synonymous_variant(LOW|SILENT|tgC/tgT|p.Cys172Cys/c.516C>T|554|glnS|protein_coding|CODING|ACT38320|1|1),upstream_gene_variant(MODIFIER||3857||382|nagA|protein_coding|CODING|ACT38317||1),upstream_gene_variant(MODIFIER||1726||468|ybfM|protein_coding|CODING|ACT38321||1),upstream_gene_variant(MODIFIER||2997||266|nagB|protein_coding|CODING|ACT38318||1),upstream_gene_variant(MODIFIER||3182||108|ybf…	159	86	COG0008	J	YES	688188	689852	+	C516T	-686.45	-684.57	5.5e-17	8.23e-18	350.04	326.51	0.5436	0.282	482-545	0.0511	-0.2768	470-522	0.0301	0.89018	0.819751
692244	C	T	SNP	upstream_gene_variant	MODIFIER	.	.	.	EFF=upstream_gene_variant(MODIFIER||2838||181|seqA|protein_coding|CODING|ACT38327||1),upstream_gene_variant(MODIFIER||3409||546|pgm|protein_coding|CODING|ACT38328||1),downstream_gene_variant(MODIFIER||51||148|fur|protein_coding|CODING|ACT38323||1),downstream_gene_variant(MODIFIER||4259||648|nagE|protein_coding|CODING|ACT38319||1),downstream_gene_variant(MODIFIER||786||176|fldA|protein_coding|CODI…	.	.	NA	NA	.	.	.	.	.	.	.	.	.	.	.	.	.	.	.	.	.	.	.	.
694546	C	T	SNP	missense_variant	MODERATE	Gac/Aac	p.Asp118Asn/c.352G>A	ybfF	EFF=missense_variant(MODERATE|MISSENSE|Gac/Aac|p.Asp118Asn/c.352G>A|254|ybfF|protein_coding|CODING|ACT38326|1|1),upstream_gene_variant(MODIFIER||536||181|seqA|protein_coding|CODING|ACT38327||1),upstream_gene_variant(MODIFIER||1107||546|pgm|protein_coding|CODING|ACT38328||1),upstream_gene_variant(MODIFIER||2961||164|ybfP|protein_coding|CODING|ACT38329||1),upstream_gene_variant(MODIFIER||1805||148|…	51	64	COG0596	R	NO	694133	694897	-	G352A	-278.61	-275.05	1.36e-10	4.27e-11	122.93	163.39	0.5162	0.0154	351-411	0.7715	0.886	350-411	0.662	0.927559	0.853576
696479	C	T	SNP	missense_variant	MODERATE	gCg/gTg	p.Ala276Val/c.827C>T	pgm	EFF=missense_variant(MODERATE|MISSENSE|gCg/gTg|p.Ala276Val/c.827C>T|546|pgm|protein_coding|CODING|ACT38328|1|1),upstream_gene_variant(MODIFIER||1028||164|ybfP|protein_coding|CODING|ACT38329||1),upstream_gene_variant(MODIFIER||3738||148|fur|protein_coding|CODING|ACT38323||1),upstream_gene_variant(MODIFIER||2919||176|fldA|protein_coding|CODING|ACT38324||1),upstream_gene_variant(MODIFIER||2486||97|y…	271	118	COG0033	G	NO	695653	697293	+	C827T	-733.52	-731.08	6.97e-15	4.73e-15	284.9	294.82	0.5561	0.0839	801-858	0.3411	0.6925	800-857	0.4244	0.969643	0.944529
699970	AC	A	DEL	frameshift_variant	HIGH	ggg/	p.Gly130fs/c.390delG	potE	EFF=frameshift_variant(HIGH||ggg/|p.Gly130fs/c.390delG|439|potE|protein_coding|CODING|ACT38331|1|1),upstream_gene_variant(MODIFIER||2707||85|ECB_00650|protein_coding|CODING|ACT38333||1),upstream_gene_variant(MODIFIER||1279||216|ybfGH|protein_coding|CODING|ACT38330||1),downstream_gene_variant(MODIFIER||386||732|speF|protein_coding|CODING|ACT38332||1),downstream_gene_variant(MODIFIER||4344||181|seq…	2	20	COG0531	E	NO	.	.	.	.	.	.	.	.	.	.	.	.	.	.	.	.	.	.	.
705616	GT	G	DEL	frameshift_variant	HIGH	aaa/	p.Lys299fs/c.896delA	kdpD	EFF=frameshift_variant(HIGH||aaa/|p.Lys299fs/c.896delA|895|kdpD|protein_coding|CODING|ACT38335|1|1),upstream_gene_variant(MODIFIER||3062||732|speF|protein_coding|CODING|ACT38332||1),upstream_gene_variant(MODIFIER||1789||225|kdpE|protein_coding|CODING|ACT38334||1|WARNING_TRANSCRIPT_NO_START_CODON),downstream_gene_variant(MODIFIER||885||190|kdpC|protein_coding|CODING|ACT38336||1),downstream_gene_va…	14	32	COG2205	T	NO	.	.	.	.	.	.	.	.	.	.	.	.	.	.	.	.	.	.	.
706212	C	T	SNP	missense_variant	MODERATE	Gcc/Acc	p.Ala101Thr/c.301G>A	kdpD	EFF=missense_variant(MODERATE|MISSENSE|Gcc/Acc|p.Ala101Thr/c.301G>A|895|kdpD|protein_coding|CODING|ACT38335|1|1),upstream_gene_variant(MODIFIER||3657||732|speF|protein_coding|CODING|ACT38332||1),upstream_gene_variant(MODIFIER||2384||225|kdpE|protein_coding|CODING|ACT38334||1|WARNING_TRANSCRIPT_NO_START_CODON),downstream_gene_variant(MODIFIER||290||190|kdpC|protein_coding|CODING|ACT38336||1),downs…	14	32	COG2205	T	NO	.	.	.	.	.	.	.	.	.	.	.	.	.	.	.	.	.	.	.
707034	A	G	SNP	missense_variant	MODERATE	cTg/cCg	p.Leu14Pro/c.41T>C	kdpC	EFF=missense_variant(MODERATE|MISSENSE|cTg/cCg|p.Leu14Pro/c.41T>C|190|kdpC|protein_coding|CODING|ACT38336|1|1),upstream_gene_variant(MODIFIER||4479||732|speF|protein_coding|CODING|ACT38332||1),upstream_gene_variant(MODIFIER||3206||225|kdpE|protein_coding|CODING|ACT38334||1|WARNING_TRANSCRIPT_NO_START_CODON),upstream_gene_variant(MODIFIER||4195||68|ybfA|protein_coding|CODING|ACT38340||1),upstream_…	17	26	COG2156	P	NO	706502	707074	-	T41C	-230.58	-232.59	1.31e-06	7.49e-06	162.19	163.45	0.5394	0.0306	1-241	0.6057	0.8893	39-241	0.6414	0.948556	0.915576
707849	G	A	SNP	missense_variant	MODERATE	gCc/gTc	p.Ala428Val/c.1283C>T	kdpB	EFF=missense_variant(MODERATE|MISSENSE|gCc/gTc|p.Ala428Val/c.1283C>T|682|kdpB|protein_coding|CODING|ACT38337|1|1),upstream_gene_variant(MODIFIER||4021||225|kdpE|protein_coding|CODING|ACT38334||1|WARNING_TRANSCRIPT_NO_START_CODON),upstream_gene_variant(MODIFIER||3380||68|ybfA|protein_coding|CODING|ACT38340||1),upstream_gene_variant(MODIFIER||1337||895|kdpD|protein_coding|CODING|ACT38335||1),upstre…	12	15	COG2216	P	NO	707083	709131	-	T309C-C1283T	-957.77	-959.28	1.11e-21	1.27e-21	386.04	381.38	0.5767	0.1272	1224-1312	0.2176	0.2592	1237-1310	0.1576	0.935302
708823	A	G	SNP	synonymous_variant	LOW	acT/acC	p.Thr103Thr/c.309T>C	kdpB	EFF=synonymous_variant(LOW|SILENT|acT/acC|p.Thr103Thr/c.309T>C|682|kdpB|protein_coding|CODING|ACT38337|1|1),upstream_gene_variant(MODIFIER||4995||225|kdpE|protein_coding|CODING|ACT38334||1|WARNING_TRANSCRIPT_NO_START_CODON),upstream_gene_variant(MODIFIER||2406||68|ybfA|protein_coding|CODING|ACT38340||1),upstream_gene_variant(MODIFIER||2311||895|kdpD|protein_coding|CODING|ACT38335||1),upstream_gen…	12	15	COG2216	P	NO	707083	709131	-	T309C-C1283T	-957.77	-959.28	1.11e-21	1.27e-21	386.04	381.38	0.5767	0.1272	1224-1312	0.2176	0.2592	1237-1310	0.1576	0.935302
711975	G	A	SNP	synonymous_variant	LOW	ctG/ctA	p.Leu40Leu/c.120G>A	rhsC	EFF=synonymous_variant(LOW|SILENT|ctG/ctA|p.Leu40Leu/c.120G>A|554|rhsC|protein_coding|CODING|ACT38341|1|1|WARNING_TRANSCRIPT_NO_START_CODON),upstream_gene_variant(MODIFIER||4901||190|kdpC|protein_coding|CODING|ACT38336||1),upstream_gene_variant(MODIFIER||1545||108|ybfB|protein_coding|CODING|ACT38342||1),upstream_gene_variant(MODIFIER||1989||477|ybfO|protein_coding|CODING|ACT38343||1),upstream_gen…	1	16	COG3209	M	NO	711856	713520	+	G120A	-682.54	-676.9	2.66e-17	5.27e-18	462.54	467.87	0.6406	0.2825	113-166	0.0721	-0.1812	104-166	0.048	0.987568	0.947309
723030	A	G	SNP	synonymous_variant	LOW	taT/taC	p.Tyr104Tyr/c.312T>C	ybgH	EFF=synonymous_variant(LOW|SILENT|taT/taC|p.Tyr104Tyr/c.312T>C|493|ybgH|protein_coding|CODING|ACT38351|1|1),upstream_gene_variant(MODIFIER||582||247|ybgI|protein_coding|CODING|ACT38352||1),upstream_gene_variant(MODIFIER||1348||218|ybgJ|protein_coding|CODING|ACT38353||1|WARNING_TRANSCRIPT_NO_START_CODON),upstream_gene_variant(MODIFIER||1998||310|ybgK|protein_coding|CODING|ACT38354||1),upstream_gen…	6	34	COG3104	E	NO	721860	723341	-	T312C	-603.96	-604.17	7.53e-18	5.48e-18	364.65	415.63	0.5387	0.0034	249-314	0.9289	0.9749	249-312	0.86	0.99871	0.999457
724551	T	C	SNP	synonymous_variant	LOW	cgT/cgC	p.Arg58Arg/c.174T>C	ybgJ	EFF=synonymous_variant(LOW|SILENT|cgT/cgC|p.Arg58Arg/c.174T>C|218|ybgJ|protein_coding|CODING|ACT38353|1|1|WARNING_TRANSCRIPT_NO_START_CODON),upstream_gene_variant(MODIFIER||477||310|ybgK|protein_coding|CODING|ACT38354||1),upstream_gene_variant(MODIFIER||1399||244|ybgL|protein_coding|CODING|ACT38355||1),upstream_gene_variant(MODIFIER||2169||263|nei|protein_coding|CODING|ACT38356||1),upstream_gene_…	54	101	COG2049	E	NO	724378	725034	+	T174C	-311.47	-311.47	1.59e-07	1.42e-07	88.86	92.49	0.5695	0.0212	153-371	0.7284	0.7958	266-357	0.5444	0.990831	0.954519
725894	G	A	SNP	synonymous_variant	LOW	ctG/ctA	p.Leu289Leu/c.867G>A	ybgK	EFF=synonymous_variant(LOW|SILENT|ctG/ctA|p.Leu289Leu/c.867G>A|310|ybgK|protein_coding|CODING|ACT38354|1|1),upstream_gene_variant(MODIFIER||56||244|ybgL|protein_coding|CODING|ACT38355||1),upstream_gene_variant(MODIFIER||826||263|nei|protein_coding|CODING|ACT38356||1),upstream_gene_variant(MODIFIER||2553||493|ybgH|protein_coding|CODING|ACT38351||1),downstream_gene_variant(MODIFIER||4073||473|phrB|…	52	116	COG1984	E	NO	725028	725960	+	G867A	-418.12	-415.69	1.72e-10	9.38e-11	256.82	253.46	0.5094	0.0378	817-876	0.5855	0.7256	817-886	0.4518	0.857341	0.835925
726957	A	G	SNP	missense_variant	MODERATE	Acc/Gcc	p.Thr80Ala/c.238A>G	nei	EFF=missense_variant(MODERATE|MISSENSE|Acc/Gcc|p.Thr80Ala/c.238A>G|263|nei|protein_coding|CODING|ACT38356|1|1),upstream_gene_variant(MODIFIER||3616||493|ybgH|protein_coding|CODING|ACT38351||1),downstream_gene_variant(MODIFIER||551||348|abrB|protein_coding|CODING|ACT38357||1),downstream_gene_variant(MODIFIER||1749||353|ybgO|protein_coding|CODING|ACT38358||1),downstream_gene_variant(MODIFIER||2602|…	32	41	COG0266	L	NO	726720	727511	+	A238G	-332.82	-334.5	2.69e-09	1.17e-09	91.81	92.73	0.5012	0.0427	214-263	0.5427	0.8236	231-287	0.5695	0.984336	0.997115
730139	G	GT	INS	frameshift_variant	HIGH	aac/aaAc	p.Asn119_Ser120fs/c.356_357insA	ybgP	EFF=frameshift_variant(HIGH||aac/aaAc|p.Asn119_Ser120fs/c.356_357insA|243|ybgP|protein_coding|CODING|ACT38359|1|1),upstream_gene_variant(MODIFIER||1586||348|abrB|protein_coding|CODING|ACT38357||1),upstream_gene_variant(MODIFIER||373||353|ybgO|protein_coding|CODING|ACT38358||1),downstream_gene_variant(MODIFIER||370||816|ybgQ|protein_coding|CODING|ACT38360||1|WARNING_TRANSCRIPT_NO_START_CODON),down…	0	17	COG3121	NU	NO	.	.	.	.	.	.	.	.	.	.	.	.	.	.	.	.	.	.	.
730622	A	G	SNP	missense_variant	MODERATE	gTc/gCc	p.Val780Ala/c.2339T>C	ybgQ	EFF=missense_variant(MODERATE|MISSENSE|gTc/gCc|p.Val780Ala/c.2339T>C|816|ybgQ|protein_coding|CODING|ACT38360|1|1|WARNING_TRANSCRIPT_NO_START_CODON),upstream_gene_variant(MODIFIER||2068||348|abrB|protein_coding|CODING|ACT38357||1),upstream_gene_variant(MODIFIER||855||353|ybgO|protein_coding|CODING|ACT38358||1),upstream_gene_variant(MODIFIER||127||243|ybgP|protein_coding|CODING|ACT38359||1),downstr…	0	23	COG3188	NU	NO	730510	732960	-	T198C-G1810A-T2339C	-918.9	-920.91	8.12e-24	1.46e-23	474.58	469.67	0.4961	0.041	184-288	0.5094	0.803	2340-2396	0.5277	0.911325
731151	C	T	SNP	missense_variant	MODERATE	Gcc/Acc	p.Ala604Thr/c.1810G>A	ybgQ	EFF=missense_variant(MODERATE|MISSENSE|Gcc/Acc|p.Ala604Thr/c.1810G>A|816|ybgQ|protein_coding|CODING|ACT38360|1|1|WARNING_TRANSCRIPT_NO_START_CODON),upstream_gene_variant(MODIFIER||2597||348|abrB|protein_coding|CODING|ACT38357||1),upstream_gene_variant(MODIFIER||1384||353|ybgO|protein_coding|CODING|ACT38358||1),upstream_gene_variant(MODIFIER||656||243|ybgP|protein_coding|CODING|ACT38359||1),upstre…	0	23	COG3188	NU	NO	730510	732960	-	T198C-G1810A-T2339C	-918.9	-920.91	8.12e-24	1.46e-23	474.58	469.67	0.4961	0.041	184-288	0.5094	0.803	2340-2396	0.5277	0.911325
732763	A	G	SNP	synonymous_variant	LOW	aaT/aaC	p.Asn66Asn/c.198T>C	ybgQ	EFF=synonymous_variant(LOW|SILENT|aaT/aaC|p.Asn66Asn/c.198T>C|816|ybgQ|protein_coding|CODING|ACT38360|1|1|WARNING_TRANSCRIPT_NO_START_CODON),upstream_gene_variant(MODIFIER||4209||348|abrB|protein_coding|CODING|ACT38357||1),upstream_gene_variant(MODIFIER||2996||353|ybgO|protein_coding|CODING|ACT38358||1),upstream_gene_variant(MODIFIER||2268||243|ybgP|protein_coding|CODING|ACT38359||1),upstream_gen…	0	23	COG3188	NU	NO	730510	732960	-	T198C-G1810A-T2339C	-918.9	-920.91	8.12e-24	1.46e-23	474.58	469.67	0.4961	0.041	184-288	0.5094	0.803	2340-2396	0.5277	0.911325
738676	A	G	SNP	missense_variant	MODERATE	aAc/aGc	p.Asn66Ser/c.197A>G	sdhB	EFF=missense_variant(MODERATE|MISSENSE|aAc/aGc|p.Asn66Ser/c.197A>G|238|sdhB|protein_coding|CODING|ACT38366|1|1),upstream_gene_variant(MODIFIER||821||933|sucA|protein_coding|CODING|ACT38367||1),upstream_gene_variant(MODIFIER||3417||427|gltA|protein_coding|CODING|ACT38362||1),upstream_gene_variant(MODIFIER||3637||405|sucB|protein_coding|CODING|ACT38368||1),downstream_gene_variant(MODIFIER||2319||12…	67	379	COG0479	C	NO	738480	739196	+	A197G-T535C	-288.98	-290.01	5.83e-09	3.2e-09	190.87	167.57	0.5202	0.0376	177-226	0.5675	0.8569	522-572	0.612	0.979906	0.931555
739014	T	C	SNP	missense_variant	MODERATE	Tat/Cat	p.Tyr179His/c.535T>C	sdhB	EFF=missense_variant(MODERATE|MISSENSE|Tat/Cat|p.Tyr179His/c.535T>C|238|sdhB|protein_coding|CODING|ACT38366|1|1),upstream_gene_variant(MODIFIER||483||933|sucA|protein_coding|CODING|ACT38367||1),upstream_gene_variant(MODIFIER||3755||427|gltA|protein_coding|CODING|ACT38362||1),upstream_gene_variant(MODIFIER||3299||405|sucB|protein_coding|CODING|ACT38368||1),upstream_gene_variant(MODIFIER||4882||388…	67	379	COG0479	C	NO	738480	739196	+	A197G-T535C	-288.98	-290.01	5.83e-09	3.2e-09	190.87	167.57	0.5202	0.0376	177-226	0.5675	0.8569	522-572	0.612	0.979906	0.931555
740553	A	G	SNP	missense_variant	MODERATE	Acc/Gcc	p.Thr353Ala/c.1057A>G	sucA	EFF=missense_variant(MODERATE|MISSENSE|Acc/Gcc|p.Thr353Ala/c.1057A>G|933|sucA|protein_coding|CODING|ACT38367|1|1),upstream_gene_variant(MODIFIER||1760||405|sucB|protein_coding|CODING|ACT38368||1),upstream_gene_variant(MODIFIER||3343||388|sucC|protein_coding|CODING|ACT38369||1),upstream_gene_variant(MODIFIER||4509||289|sucD|protein_coding|CODING|ACT38370||1),downstream_gene_variant(MODIFIER||4196|…	49	290	COG0567	C	NO	739497	742298	+	A1057G-A2468G	-1192.03	-1191.58	8.26e-28	5.26e-28	530.19	516.71	0.5629	0.1221	2307-2362	0.229	0.2538	2309-2359	0.1555	0.936783
741964	A	G	SNP	missense_variant	MODERATE	aAg/aGg	p.Lys823Arg/c.2468A>G	sucA	EFF=missense_variant(MODERATE|MISSENSE|aAg/aGg|p.Lys823Arg/c.2468A>G|933|sucA|protein_coding|CODING|ACT38367|1|1),upstream_gene_variant(MODIFIER||349||405|sucB|protein_coding|CODING|ACT38368||1),upstream_gene_variant(MODIFIER||1932||388|sucC|protein_coding|CODING|ACT38369||1),upstream_gene_variant(MODIFIER||3098||289|sucD|protein_coding|CODING|ACT38370||1),upstream_gene_variant(MODIFIER||4902||65…	49	290	COG0567	C	NO	739497	742298	+	A1057G-A2468G	-1192.03	-1191.58	8.26e-28	5.26e-28	530.19	516.71	0.5629	0.1221	2307-2362	0.229	0.2538	2309-2359	0.1555	0.936783
742473	A	G	SNP	missense_variant	MODERATE	gAc/gGc	p.Asp54Gly/c.161A>G	sucB	EFF=missense_variant(MODERATE|MISSENSE|gAc/gGc|p.Asp54Gly/c.161A>G|405|sucB|protein_coding|CODING|ACT38368|1|1),upstream_gene_variant(MODIFIER||1423||388|sucC|protein_coding|CODING|ACT38369||1),upstream_gene_variant(MODIFIER||2589||289|sucD|protein_coding|CODING|ACT38370||1),upstream_gene_variant(MODIFIER||4393||658|hrsA|protein_coding|CODING|ACT38372||1),downstream_gene_variant(MODIFIER||4009||5…	117	364	COG0508	C	NO	742313	743530	+	A161G	-538.74	-538.06	7.29e-13	7.36e-13	201.51	201.86	0.5512	0.0332	135-204	0.6018	0.9203	124-193	0.7157	0.984335	0.908216
748391	A	G	SNP	missense_variant	MODERATE	aAc/aGc	p.Asn509Ser/c.1526A>G	hrsA	EFF=missense_variant(MODERATE|MISSENSE|aAc/aGc|p.Asn509Ser/c.1526A>G|658|hrsA|protein_coding|CODING|ACT38372|1|1),upstream_gene_variant(MODIFIER||469||877|ybgG|protein_coding|CODING|ACT38373||1),upstream_gene_variant(MODIFIER||1634||240|farR|protein_coding|CODING|ACT38371||1),upstream_gene_variant(MODIFIER||3949||522|cydA|protein_coding|CODING|ACT38374||1),downstream_gene_variant(MODIFIER||4861||…	0	18	NA	NA	NO	.	.	.	.	.	.	.	.	.	.	.	.	.	.	.	.	.	.	.
748752	TG	T	DEL	frameshift_variant	HIGH	ggg/	p.Gly630fs/c.1888delG	hrsA	EFF=frameshift_variant(HIGH||ggg/|p.Gly630fs/c.1888delG|658|hrsA|protein_coding|CODING|ACT38372|1|1),upstream_gene_variant(MODIFIER||107||877|ybgG|protein_coding|CODING|ACT38373||1),upstream_gene_variant(MODIFIER||1996||240|farR|protein_coding|CODING|ACT38371||1),upstream_gene_variant(MODIFIER||3587||522|cydA|protein_coding|CODING|ACT38374||1),downstream_gene_variant(MODIFIER||3691||388|sucC|prot…	0	18	NA	NA	NO	.	.	.	.	.	.	.	.	.	.	.	.	.	.	.	.	.	.	.
755295	C	T	SNP	synonymous_variant	LOW	gaC/gaT	p.Asp35Asp/c.105C>T	ybgE	EFF=synonymous_variant(LOW|SILENT|gaC/gaT|p.Asp35Asp/c.105C>T|97|ybgE|protein_coding|CODING|ACT38377|1|1),upstream_gene_variant(MODIFIER||339||134|ybgC|protein_coding|CODING|ACT38378||1|WARNING_TRANSCRIPT_NO_START_CODON),upstream_gene_variant(MODIFIER||740||230|tolQ|protein_coding|CODING|ACT38379||1|WARNING_TRANSCRIPT_NO_START_CODON),upstream_gene_variant(MODIFIER||1436||142|tolR|protein_coding|C…	156	83	COG3790	S	NO	755191	755484	+	C105T	-119.24	-118.09	0.00442772	0.00342566	85	76.62	0.4966	0.06	66-115	0.4082	0.611	73-157	0.3418	0.928075	0.896447
756622	C	T	SNP	synonymous_variant	LOW	aaC/aaT	p.Asn196Asn/c.588C>T	tolQ	EFF=synonymous_variant(LOW|SILENT|aaC/aaT|p.Asn196Asn/c.588C>T|230|tolQ|protein_coding|CODING|ACT38379|1|1|WARNING_TRANSCRIPT_NO_START_CODON),upstream_gene_variant(MODIFIER||109||142|tolR|protein_coding|CODING|ACT38380||1),upstream_gene_variant(MODIFIER||602||421|tolA|protein_coding|CODING|ACT38381||1|WARNING_TRANSCRIPT_NO_START_CODON),upstream_gene_variant(MODIFIER||2000||430|tolB|protein_coding…	423	174	COG0811	U	NO	756035	756727	+	C588T	-257.57	-258.45	1.41e-08	9.27e-09	194.47	209.85	0.5327	0.1961	520-601	0.1145	0.1576	525-578	0.1114	0.919434	0.967433
763915	A	G	SNP	missense_variant	MODERATE	Agt/Ggt	p.Ser41Gly/c.121A>G	pnuC	EFF=missense_variant(MODERATE|MISSENSE|Agt/Ggt|p.Ser41Gly/c.121A>G|239|pnuC|protein_coding|CODING|ACT38386|1|1),upstream_gene_variant(MODIFIER||2347||350|aroG|protein_coding|CODING|ACT38389||1),downstream_gene_variant(MODIFIER||596||313|ybgR|protein_coding|CODING|ACT38387||1),downstream_gene_variant(MODIFIER||4001||430|tolB|protein_coding|CODING|ACT38382||1),downstream_gene_variant(MODIFIER||3445…	9	193	COG3201	H	NO	763795	764514	+	A121G-T515C	-286.97	-289.63	1.42e-09	6.37e-10	117.78	136.89	0.4867	0.0526	73-123	0.4549	0.8123	73-123	0.5506	0.972206	0.835373
764309	T	C	SNP	missense_variant	MODERATE	gTg/gCg	p.Val172Ala/c.515T>C	pnuC	EFF=missense_variant(MODERATE|MISSENSE|gTg/gCg|p.Val172Ala/c.515T>C|239|pnuC|protein_coding|CODING|ACT38386|1|1),upstream_gene_variant(MODIFIER||1953||350|aroG|protein_coding|CODING|ACT38389||1),downstream_gene_variant(MODIFIER||202||313|ybgR|protein_coding|CODING|ACT38387||1),downstream_gene_variant(MODIFIER||4395||430|tolB|protein_coding|CODING|ACT38382||1),downstream_gene_variant(MODIFIER||383…	9	193	COG3201	H	NO	763795	764514	+	A121G-T515C	-286.97	-289.63	1.42e-09	6.37e-10	117.78	136.89	0.4867	0.0526	73-123	0.4549	0.8123	73-123	0.5506	0.972206	0.835373
766884	G	A	SNP	missense_variant	MODERATE	tGc/tAc	p.Cys208Tyr/c.623G>A	aroG	EFF=missense_variant(MODERATE|MISSENSE|tGc/tAc|p.Cys208Tyr/c.623G>A|350|aroG|protein_coding|CODING|ACT38389|1|1),upstream_gene_variant(MODIFIER||1432||313|ybgR|protein_coding|CODING|ACT38387||1),upstream_gene_variant(MODIFIER||938||126|ybgS|protein_coding|CODING|ACT38388||1),downstream_gene_variant(MODIFIER||4957|||valZ|tRNA|NON_CODING|ECB_t00018||1),downstream_gene_variant(MODIFIER||4878|||lysY|…	156	321	COG0722	E	NO	766262	767314	+	G623A-T785C	-421.56	-420.5	4.48e-09	2.24e-08	122.17	125.42	0.5453	0.0802	753-802	0.3549	0.7109	622-684	0.442	0.934004	0.857073
767046	T	C	SNP	missense_variant	MODERATE	gTg/gCg	p.Val262Ala/c.785T>C	aroG	EFF=missense_variant(MODERATE|MISSENSE|gTg/gCg|p.Val262Ala/c.785T>C|350|aroG|protein_coding|CODING|ACT38389|1|1),upstream_gene_variant(MODIFIER||1594||313|ybgR|protein_coding|CODING|ACT38387||1),upstream_gene_variant(MODIFIER||1100||126|ybgS|protein_coding|CODING|ACT38388||1),downstream_gene_variant(MODIFIER||4818|||lysZ|tRNA|NON_CODING|ECB_t00020||1),downstream_gene_variant(MODIFIER||4610|||lysQ…	156	321	COG0722	E	NO	766262	767314	+	G623A-T785C	-421.56	-420.5	4.48e-09	2.24e-08	122.17	125.42	0.5453	0.0802	753-802	0.3549	0.7109	622-684	0.442	0.934004	0.857073
767699	C	T	SNP	missense_variant	MODERATE	Ggt/Agt	p.Gly176Ser/c.526G>A	gpmA	EFF=missense_variant(MODERATE|MISSENSE|Ggt/Agt|p.Gly176Ser/c.526G>A|250|gpmA|protein_coding|CODING|ACT38390|1|1),upstream_gene_variant(MODIFIER||2247||313|ybgR|protein_coding|CODING|ACT38387||1),upstream_gene_variant(MODIFIER||1753||126|ybgS|protein_coding|CODING|ACT38388||1),downstream_gene_variant(MODIFIER||727||346|galM|protein_coding|CODING|ACT38391||1|WARNING_TRANSCRIPT_NO_START_CODON),downs…	1518	1043	COG0588	G	NO	767472	768224	-	G526A	-295.25	-293.74	1.39e-08	1.15e-08	164.94	168.44	0.5237	0.1013	510-575	0.2838	0.4739	511-565	0.2618	0.989947	0.962905
769050	C	CG	INS	frameshift_variant	HIGH	ccg/ccCg	p.Pro139_Gly140fs/c.416_417insC	galM	EFF=frameshift_variant(HIGH||ccg/ccCg|p.Pro139_Gly140fs/c.416_417insC|346|galM|protein_coding|CODING|ACT38391|1|1|WARNING_TRANSCRIPT_NO_START_CODON),upstream_gene_variant(MODIFIER||3599||313|ybgR|protein_coding|CODING|ACT38387||1),upstream_gene_variant(MODIFIER||3105||126|ybgS|protein_coding|CODING|ACT38388||1),upstream_gene_variant(MODIFIER||827||250|gpmA|protein_coding|CODING|ACT38390||1),downs…	77	122	COG2017	G	NO	.	.	.	.	.	.	.	.	.	.	.	.	.	.	.	.	.	.	.
769961	A	G	SNP	synonymous_variant	LOW	cgT/cgC	p.Arg216Arg/c.648T>C	galK	EFF=synonymous_variant(LOW|SILENT|cgT/cgC|p.Arg216Arg/c.648T>C|382|galK|protein_coding|CODING|ACT38392|1|1),upstream_gene_variant(MODIFIER||4509||313|ybgR|protein_coding|CODING|ACT38387||1),upstream_gene_variant(MODIFIER||4015||126|ybgS|protein_coding|CODING|ACT38388||1),upstream_gene_variant(MODIFIER||1737||250|gpmA|protein_coding|CODING|ACT38390||1),upstream_gene_variant(MODIFIER||495||346|galM…	50	95	COG0153	G	NO	769460	770608	-	T648C	-460.72	-462.86	5.84e-14	5.63e-14	273.86	277.46	0.5436	0.1601	605-654	0.1572	0.4541	600-649	0.2503	0.99948	0.992046
772931	T	C	SNP	upstream_gene_variant	MODIFIER	.	.	.	EFF=upstream_gene_variant(MODIFIER||4707||250|gpmA|protein_coding|CODING|ACT38390||1),upstream_gene_variant(MODIFIER||3465||346|galM|protein_coding|CODING|ACT38391||1|WARNING_TRANSCRIPT_NO_START_CODON),upstream_gene_variant(MODIFIER||2471||49|ybhT|protein_coding|CODING|ACT38397||1),upstream_gene_variant(MODIFIER||2323||382|galK|protein_coding|CODING|ACT38392||1),upstream_gene_variant(MODIFIER||27…	.	.	NA	NA	.	.	.	.	.	.	.	.	.	.	.	.	.	.	.	.	.	.	.	.
774487	A	G	SNP	stop_lost	HIGH	Taa/Caa	p.Ter263Glnext*?/c.787T>C	modE	EFF=stop_lost(HIGH|MISSENSE|Taa/Caa|p.Ter263Glnext*?/c.787T>C|262|modE|protein_coding|CODING|ACT38396|1|1),upstream_gene_variant(MODIFIER||915||49|ybhT|protein_coding|CODING|ACT38397||1),upstream_gene_variant(MODIFIER||3879||382|galK|protein_coding|CODING|ACT38392||1),upstream_gene_variant(MODIFIER||1231||257|modA|protein_coding|CODING|ACT38398||1),upstream_gene_variant(MODIFIER||2004||229|modB|p…	52	38	COG2005	R	NO	774485	775273	-	T787C	-302.92	-302.92	1.8e-09	1.06e-09	113.71	114.98	0.5172	0.003	708-757	0.8146	0.9842	706-755	0.7632	0.999227	0.996063
776411	A	G	SNP	missense_variant	MODERATE	Aca/Gca	p.Thr232Ala/c.694A>G	modA	EFF=missense_variant(MODERATE|MISSENSE|Aca/Gca|p.Thr232Ala/c.694A>G|257|modA|protein_coding|CODING|ACT38398|1|1),upstream_gene_variant(MODIFIER||80||229|modB|protein_coding|CODING|ACT38399||1),upstream_gene_variant(MODIFIER||4753||348|galT|protein_coding|CODING|ACT38393||1),upstream_gene_variant(MODIFIER||772||352|modC|protein_coding|CODING|ACT38400||1),upstream_gene_variant(MODIFIER||3727||338|g…	46	99	COG0725	P	NO	775718	776491	+	A694G	-307.26	-307.74	3.67e-10	5.84e-10	217.17	247.29	0.5018	0.0085	664-713	0.8513	0.9684	664-713	0.8341	0.995484	0.95801
778893	C	T	SNP	synonymous_variant	LOW	gcG/gcA	p.Ala56Ala/c.168G>A	ybhA	EFF=synonymous_variant(LOW|SILENT|gcG/gcA|p.Ala56Ala/c.168G>A|272|ybhA|protein_coding|CODING|ACT38401|1|1),upstream_gene_variant(MODIFIER||322||331|ybhE|protein_coding|CODING|ACT38402||1),upstream_gene_variant(MODIFIER||4476||490|modF|protein_coding|CODING|ACT38395||1),upstream_gene_variant(MODIFIER||3620||262|modE|protein_coding|CODING|ACT38396||1),upstream_gene_variant(MODIFIER||2495||350|ybhH|…	96	57	COG0561	R	NO	778242	779060	-	G168A	-312.77	-312.77	1.51e-06	1.66e-06	59.9	57.48	0.5	0.0253	154-203	0.6706	0.6629	146-202	0.3879	0.998263	0.954632
780673	C	T	SNP	missense_variant	MODERATE	Gcc/Acc	p.Ala199Thr/c.595G>A	ybhD	EFF=missense_variant(MODERATE|MISSENSE|Gcc/Acc|p.Ala199Thr/c.595G>A|338|ybhD|protein_coding|CODING|ACT38403|1|1),upstream_gene_variant(MODIFIER||715||350|ybhH|protein_coding|CODING|ACT38404||1),upstream_gene_variant(MODIFIER||1843||477|ybhI|protein_coding|CODING|ACT38405||1),upstream_gene_variant(MODIFIER||1613||272|ybhA|protein_coding|CODING|ACT38401||1),upstream_gene_variant(MODIFIER||3459||753…	2	21	COG0583	K	NO	780251	781267	-	G595A	-336.87	-332.72	1.81e-11	6.56e-12	95.94	103.38	0.4938	0.0649	564-613	0.3533	0.6463	564-613	0.3487	0.985299	0.97946
781381	C	T	SNP	upstream_gene_variant	MODIFIER	.	.	.	EFF=upstream_gene_variant(MODIFIER||7||350|ybhH|protein_coding|CODING|ACT38404||1),upstream_gene_variant(MODIFIER||1135||477|ybhI|protein_coding|CODING|ACT38405||1),upstream_gene_variant(MODIFIER||2321||272|ybhA|protein_coding|CODING|ACT38401||1),upstream_gene_variant(MODIFIER||2751||753|ybhJ|protein_coding|CODING|ACT38406||1),upstream_gene_variant(MODIFIER||114||338|ybhD|protein_coding|CODING|AC…	.	.	NA	NA	.	.	.	.	.	.	.	.	.	.	.	.	.	.	.	.	.	.	.	.
784646	A	G	SNP	missense_variant	MODERATE	cAg/cGg	p.Gln172Arg/c.515A>G	ybhJ	EFF=missense_variant(MODERATE|MISSENSE|cAg/cGg|p.Gln172Arg/c.515A>G|753|ybhJ|protein_coding|CODING|ACT38406|1|1),upstream_gene_variant(MODIFIER||3379||338|ybhD|protein_coding|CODING|ACT38403||1),downstream_gene_variant(MODIFIER||4436||331|ybhE|protein_coding|CODING|ACT38402||1),downstream_gene_variant(MODIFIER||1888||427|ybhC|protein_coding|CODING|ACT38407||1|WARNING_TRANSCRIPT_NO_START_CODON),do…	2	17	COG1048	C	NO	784132	786393	+	A515G-A1587G-A1801G	-938.71	-942.35	2.69e-24	2.08e-21	610.23	695.66	0.5412	0.2856	472-521	0.0496	0.4659	465-530	0.2571	0.997117
785718	A	G	SNP	synonymous_variant	LOW	gaA/gaG	p.Glu529Glu/c.1587A>G	ybhJ	EFF=synonymous_variant(LOW|SILENT|gaA/gaG|p.Glu529Glu/c.1587A>G|753|ybhJ|protein_coding|CODING|ACT38406|1|1),upstream_gene_variant(MODIFIER||4451||338|ybhD|protein_coding|CODING|ACT38403||1),upstream_gene_variant(MODIFIER||4526||114|ECB_00730|protein_coding|CODING|ACT38412||1),upstream_gene_variant(MODIFIER||4851||61|ECB_00731|protein_coding|CODING|ACT38413||1),downstream_gene_variant(MODIFIER||8…	2	17	COG1048	C	NO	784132	786393	+	A515G-A1587G-A1801G	-938.71	-942.35	2.69e-24	2.08e-21	610.23	695.66	0.5412	0.2856	472-521	0.0496	0.4659	465-530	0.2571	0.997117
785932	A	G	SNP	missense_variant	MODERATE	Aat/Gat	p.Asn601Asp/c.1801A>G	ybhJ	EFF=missense_variant(MODERATE|MISSENSE|Aat/Gat|p.Asn601Asp/c.1801A>G|753|ybhJ|protein_coding|CODING|ACT38406|1|1),upstream_gene_variant(MODIFIER||4665||338|ybhD|protein_coding|CODING|ACT38403||1),upstream_gene_variant(MODIFIER||4312||114|ECB_00730|protein_coding|CODING|ACT38412||1),upstream_gene_variant(MODIFIER||4637||61|ECB_00731|protein_coding|CODING|ACT38413||1),downstream_gene_variant(MODIFI…	2	17	COG1048	C	NO	784132	786393	+	A515G-A1587G-A1801G	-938.71	-942.35	2.69e-24	2.08e-21	610.23	695.66	0.5412	0.2856	472-521	0.0496	0.4659	465-530	0.2571	0.997117
787728	A	G	SNP	synonymous_variant	LOW	cgT/cgC	p.Arg30Arg/c.90T>C	ybhC	EFF=synonymous_variant(LOW|SILENT|cgT/cgC|p.Arg30Arg/c.90T>C|427|ybhC|protein_coding|CODING|ACT38407|1|1|WARNING_TRANSCRIPT_NO_START_CODON),upstream_gene_variant(MODIFIER||2516||114|ECB_00730|protein_coding|CODING|ACT38412||1),upstream_gene_variant(MODIFIER||2841||61|ECB_00731|protein_coding|CODING|ACT38413||1),upstream_gene_variant(MODIFIER||3727||183|ECB_00732|protein_coding|CODING|ACT38414||1)…	206	93	COG4677	G	NO	786534	787817	-	T90C	-530.29	-530.16	9.69e-16	5.95e-16	342.13	307.34	0.5586	0.0001	46-100	0.9957	0.9988	42-97	0.9788	0.994243	0.991848
790716	C	T	SNP	stop_gained	HIGH	Cga/Tga	p.Arg50*/c.148C>T	ECB_00731	EFF=stop_gained(HIGH|NONSENSE|Cga/Tga|p.Arg50*/c.148C>T|61|ECB_00731|protein_coding|CODING|ACT38413|1|1),upstream_gene_variant(MODIFIER||739||183|ECB_00732|protein_coding|CODING|ACT38414||1),upstream_gene_variant(MODIFIER||1293||540|ECB_00733|protein_coding|CODING|ACT38415||1),upstream_gene_variant(MODIFIER||2899||427|ybhC|protein_coding|CODING|ACT38407||1|WARNING_TRANSCRIPT_NO_START_CODON),upstr…	NA	NA	NA	NA	NO	790569	790754	+	C148T	-51.63	-50.69	0.004651	0.00315097	49.73	61.38	0.4839	0.0017	124-173	0.9518	0.9972	81-149	0.9587	0.998285	0.981287
791712	G	A	SNP	synonymous_variant	LOW	ctG/ctA	p.Leu86Leu/c.258G>A	ECB_00732	EFF=synonymous_variant(LOW|SILENT|ctG/ctA|p.Leu86Leu/c.258G>A|183|ECB_00732|protein_coding|CODING|ACT38414|1|1),upstream_gene_variant(MODIFIER||297||540|ECB_00733|protein_coding|CODING|ACT38415||1),upstream_gene_variant(MODIFIER||3895||427|ybhC|protein_coding|CODING|ACT38407||1|WARNING_TRANSCRIPT_NO_START_CODON),upstream_gene_variant(MODIFIER||1919||253|ECB_00734|protein_coding|CODING|ACT38416||1…	NA	NA	NA	NA	NO	791455	792006	+	G258A	-190.28	-189.27	2.88e-06	2.06e-06	100.65	70.77	0.4564	0.0515	179-258	0.4236	0.5816	184-258	0.298	0.969262	0.916858
792093	C	T	SNP	missense_variant	MODERATE	Cgc/Tgc	p.Arg29Cys/c.85C>T	ECB_00733	EFF=missense_variant(MODERATE|MISSENSE|Cgc/Tgc|p.Arg29Cys/c.85C>T|540|ECB_00733|protein_coding|CODING|ACT38415|1|1),upstream_gene_variant(MODIFIER||4276||427|ybhC|protein_coding|CODING|ACT38407||1|WARNING_TRANSCRIPT_NO_START_CODON),upstream_gene_variant(MODIFIER||1538||253|ECB_00734|protein_coding|CODING|ACT38416||1),upstream_gene_variant(MODIFIER||3071||356|ECB_00726|protein_coding|CODING|ACT384…	NA	NA	NA	NA	NO	792009	793631	+	C85T	-664.38	-662.47	2.16e-17	2.17e-17	236.49	236.53	0.4842	0	48-97	0.9999	1	24-88	0.9994	0.99992	0.999168
794409	GGGGG	GGGGGGGGGG	INS	upstream_gene_variant	MODIFIER	.	.	.	EFF=upstream_gene_variant(MODIFIER||28||152|ECB_00735|protein_coding|CODING|ACT38417||1|WARNING_TRANSCRIPT_NO_START_CODON),upstream_gene_variant(MODIFIER||4632||94|ECB_00727|protein_coding|CODING|ACT38409||1|WARNING_TRANSCRIPT_NO_START_CODON),upstream_gene_variant(MODIFIER||483||132|ECB_00736|protein_coding|CODING|ACT38418||1|WARNING_TRANSCRIPT_NO_START_CODON),upstream_gene_variant(MODIFIER||4301…	.	.	NA	NA	.	.	.	.	.	.	.	.	.	.	.	.	.	.	.	.	.	.	.	.
794721	C	G	SNP	missense_variant	MODERATE	Cct/Gct	p.Pro94Ala/c.280C>G	ECB_00735	EFF=missense_variant(MODERATE|MISSENSE|Cct/Gct|p.Pro94Ala/c.280C>G|152|ECB_00735|protein_coding|CODING|ACT38417|1|1|WARNING_TRANSCRIPT_NO_START_CODON),upstream_gene_variant(MODIFIER||4939||94|ECB_00727|protein_coding|CODING|ACT38409||1|WARNING_TRANSCRIPT_NO_START_CODON),upstream_gene_variant(MODIFIER||176||132|ECB_00736|protein_coding|CODING|ACT38418||1|WARNING_TRANSCRIPT_NO_START_CODON),upstream…	NA	NA	NA	NA	NO	794442	794900	+	C280G	-212.8	-214.66	1.09e-06	4.38e-06	71.87	55.74	0.5526	0.1042	219-287	0.2744	0.4075	181-242	0.2276	0.954117	0.934135
796027	T	C	SNP	synonymous_variant	LOW	gcA/gcG	p.Ala101Ala/c.303A>G	ECB_00737	EFF=synonymous_variant(LOW|SILENT|gcA/gcG|p.Ala101Ala/c.303A>G|330|ECB_00737|protein_coding|CODING|ACT38419|1|1),upstream_gene_variant(MODIFIER||728||445|ECB_00738|protein_coding|CODING|ACT38420||1),downstream_gene_variant(MODIFIER||4021||183|ECB_00732|protein_coding|CODING|ACT38414||1),downstream_gene_variant(MODIFIER||2103||381|ECB_00739|protein_coding|CODING|ACT38421||1),downstream_gene_varian…	NA	NA	NA	NA	NO	795337	796329	-	T71C-A303G	-251.76	-253.23	2.43e-12	2.93e-12	230.45	199.71	0.3161	0.0218	29-78	0.6758	0.8012	29-78	0.5323	0.997041	0.989514
796259	A	G	SNP	missense_variant	MODERATE	gTc/gCc	p.Val24Ala/c.71T>C	ECB_00737	EFF=missense_variant(MODERATE|MISSENSE|gTc/gCc|p.Val24Ala/c.71T>C|330|ECB_00737|protein_coding|CODING|ACT38419|1|1),upstream_gene_variant(MODIFIER||496||445|ECB_00738|protein_coding|CODING|ACT38420||1),downstream_gene_variant(MODIFIER||4253||183|ECB_00732|protein_coding|CODING|ACT38414||1),downstream_gene_variant(MODIFIER||1871||381|ECB_00739|protein_coding|CODING|ACT38421||1),downstream_gene_var…	NA	NA	NA	NA	NO	795337	796329	-	T71C-A303G	-251.76	-253.23	2.43e-12	2.93e-12	230.45	199.71	0.3161	0.0218	29-78	0.6758	0.8012	29-78	0.5323	0.997041	0.989514
796555	T	TG	INS	upstream_gene_variant	MODIFIER	.	.	.	EFF=upstream_gene_variant(MODIFIER||199||445|ECB_00738|protein_coding|CODING|ACT38420||1),upstream_gene_variant(MODIFIER||227||330|ECB_00737|protein_coding|CODING|ACT38419||1),downstream_gene_variant(MODIFIER||4550||183|ECB_00732|protein_coding|CODING|ACT38414||1),downstream_gene_variant(MODIFIER||1574||381|ECB_00739|protein_coding|CODING|ACT38421||1),downstream_gene_variant(MODIFIER||2925||540|E…	.	.	NA	NA	.	.	.	.	.	.	.	.	.	.	.	.	.	.	.	.	.	.	.	.
796792	A	AG	INS	frameshift_variant	HIGH	aag/aaGg	p.Lys13_Gly14fs/c.39_40insG	ECB_00738	EFF=frameshift_variant(HIGH||aag/aaGg|p.Lys13_Gly14fs/c.39_40insG|445|ECB_00738|protein_coding|CODING|ACT38420|1|1),upstream_gene_variant(MODIFIER||464||330|ECB_00737|protein_coding|CODING|ACT38419||1),downstream_gene_variant(MODIFIER||4787||183|ECB_00732|protein_coding|CODING|ACT38414||1),downstream_gene_variant(MODIFIER||1337||381|ECB_00739|protein_coding|CODING|ACT38421||1),downstream_gene_var…	NA	NA	NA	NA	NO	.	.	.	.	.	.	.	.	.	.	.	.	.	.	.	.	.	.	.
798332	CA	C	DEL	frameshift_variant	HIGH	ttg/	p.Leu315fs/c.943delT	ECB_00739	EFF=frameshift_variant(HIGH||ttg/|p.Leu315fs/c.943delT|381|ECB_00739|protein_coding|CODING|ACT38421|1|1),upstream_gene_variant(MODIFIER||2004||330|ECB_00737|protein_coding|CODING|ACT38419||1),upstream_gene_variant(MODIFIER||3637||346|bioB|protein_coding|CODING|ACT38424||1),upstream_gene_variant(MODIFIER||4674||384|bioF|protein_coding|CODING|ACT38425||1),downstream_gene_variant(MODIFIER||4702||540…	NA	NA	NA	NA	NO	.	.	.	.	.	.	.	.	.	.	.	.	.	.	.	.	.	.	.
802098	C	T	SNP	synonymous_variant	LOW	agC/agT	p.Ser43Ser/c.129C>T	bioB	EFF=synonymous_variant(LOW|SILENT|agC/agT|p.Ser43Ser/c.129C>T|346|bioB|protein_coding|CODING|ACT38424|1|1),upstream_gene_variant(MODIFIER||909||384|bioF|protein_coding|CODING|ACT38425||1),upstream_gene_variant(MODIFIER||2050||251|bioC|protein_coding|CODING|ACT38426||1),upstream_gene_variant(MODIFIER||2823||381|ECB_00739|protein_coding|CODING|ACT38421||1),upstream_gene_variant(MODIFIER||2798||225|…	6	94	COG0502	H	NO	801970	803010	+	C129T	-416.16	-416.16	1.11e-11	1.25e-11	276.32	261.28	0.5623	0.2327	119-185	0.0791	0.0358	189-253	0.0824	0.999842	0.997667
803994	C	T	SNP	missense_variant	MODERATE	Cgt/Tgt	p.Arg330Cys/c.988C>T	bioF	EFF=missense_variant(MODERATE|MISSENSE|Cgt/Tgt|p.Arg330Cys/c.988C>T|384|bioF|protein_coding|CODING|ACT38425|1|1),upstream_gene_variant(MODIFIER||154||251|bioC|protein_coding|CODING|ACT38426||1),upstream_gene_variant(MODIFIER||4719||381|ECB_00739|protein_coding|CODING|ACT38421||1),upstream_gene_variant(MODIFIER||902||225|bioD|protein_coding|CODING|ACT38427||1|WARNING_TRANSCRIPT_NO_START_CODON),ups…	2	36	COG0156	H	NO	803007	804161	+	C988T	-567.29	-566.18	8.06e-14	6.51e-14	257.67	263.26	0.5815	0.0028	984-1114	0.9412	0.9928	984-1100	0.9349	0.992603	0.96002
804961	A	G	SNP	synonymous_variant	LOW	gcA/gcG	p.Ala22Ala/c.66A>G	bioD	EFF=synonymous_variant(LOW|SILENT|gcA/gcG|p.Ala22Ala/c.66A>G|225|bioD|protein_coding|CODING|ACT38427|1|1|WARNING_TRANSCRIPT_NO_START_CODON),upstream_gene_variant(MODIFIER||4426||158|ybhB|protein_coding|CODING|ACT38422||1),upstream_gene_variant(MODIFIER||1191||673|uvrB|protein_coding|CODING|ACT38428||1),upstream_gene_variant(MODIFIER||3078||429|bioA|protein_coding|CODING|ACT38423||1),upstream_gene…	5	89	NA	NA	NO	804896	805573	+	A66G	-277.29	-283.1	7.85e-09	1.62e-08	78.77	73.19	0.5489	0.0911	42-91	0.312	0.7837	42-91	0.5057	0.981261	0.929051
808811	C	T	SNP	missense_variant	MODERATE	Gac/Aac	p.Asp155Asn/c.463G>A	ybhK	EFF=missense_variant(MODERATE|MISSENSE|Gac/Aac|p.Asp155Asn/c.463G>A|302|ybhK|protein_coding|CODING|ACT38429|1|1),upstream_gene_variant(MODIFIER||859||329|moaA|protein_coding|CODING|ACT38430||1),upstream_gene_variant(MODIFIER||1870||170|moaB|protein_coding|CODING|ACT38431||1),upstream_gene_variant(MODIFIER||2385||161|moaC|protein_coding|CODING|ACT38432||1),upstream_gene_variant(MODIFIER||2863||81|…	49	50	COG0391	S	NO	808365	809273	-	G463A	-371.16	-370.97	9.95e-11	9.05e-11	288.81	266.95	0.4888	0.084	447-496	0.2757	0.6077	453-502	0.3175	0.989804	0.870042
810320	A	G	SNP	synonymous_variant	LOW	ttA/ttG	p.Leu217Leu/c.651A>G	moaA	EFF=synonymous_variant(LOW|SILENT|ttA/ttG|p.Leu217Leu/c.651A>G|329|moaA|protein_coding|CODING|ACT38430|1|1),upstream_gene_variant(MODIFIER||361||170|moaB|protein_coding|CODING|ACT38431||1),upstream_gene_variant(MODIFIER||876||161|moaC|protein_coding|CODING|ACT38432||1),upstream_gene_variant(MODIFIER||1354||81|moaD|protein_coding|CODING|ACT38433||1),upstream_gene_variant(MODIFIER||1601||150|moaE|p…	230	109	COG2896	H	NO	809670	810659	+	A651G	-429.93	-434.06	6.93e-12	7.51e-12	188.38	141.94	0.5387	0.1874	590-661	0.1212	-0.0588	613-662	0.065	0.975589	0.919347
810906	A	G	SNP	missense_variant	MODERATE	Acg/Gcg	p.Thr76Ala/c.226A>G	moaB	EFF=missense_variant(MODERATE|MISSENSE|Acg/Gcg|p.Thr76Ala/c.226A>G|170|moaB|protein_coding|CODING|ACT38431|1|1),upstream_gene_variant(MODIFIER||290||161|moaC|protein_coding|CODING|ACT38432||1),upstream_gene_variant(MODIFIER||768||81|moaD|protein_coding|CODING|ACT38433||1),upstream_gene_variant(MODIFIER||1015||150|moaE|protein_coding|CODING|ACT38434||1),upstream_gene_variant(MODIFIER||1603||234|yb…	143	147	COG0521	H	NO	.	.	.	.	.	.	.	.	.	.	.	.	.	.	.	.	.	.	.
810908	GGGG	GGGGGGGG	INS	frameshift_variant	HIGH	ggt/GGGGggt	p.Gly78_Thr79fs/c.232_233insGGGG	moaB	EFF=frameshift_variant(HIGH||ggt/GGGGggt|p.Gly78_Thr79fs/c.232_233insGGGG|170|moaB|protein_coding|CODING|ACT38431|1|1),upstream_gene_variant(MODIFIER||284||161|moaC|protein_coding|CODING|ACT38432||1),upstream_gene_variant(MODIFIER||762||81|moaD|protein_coding|CODING|ACT38433||1),upstream_gene_variant(MODIFIER||1009||150|moaE|protein_coding|CODING|ACT38434||1),upstream_gene_variant(MODIFIER||1597|…	143	147	COG0521	H	NO	.	.	.	.	.	.	.	.	.	.	.	.	.	.	.	.	.	.	.
812153	G	A	SNP	missense_variant	MODERATE	cGc/cAc	p.Arg78His/c.233G>A	moaE	EFF=missense_variant(MODERATE|MISSENSE|cGc/cAc|p.Arg78His/c.233G>A|150|moaE|protein_coding|CODING|ACT38434|1|1),upstream_gene_variant(MODIFIER||356||234|ybhL|protein_coding|CODING|ACT38435||1),upstream_gene_variant(MODIFIER||1265||237|ybhM|protein_coding|CODING|ACT38436||1),upstream_gene_variant(MODIFIER||2880||302|ybhK|protein_coding|CODING|ACT38429||1),downstream_gene_variant(MODIFIER||3980||67…	156	80	COG0314	H	NO	811921	812373	+	G233A	-185.69	-182.22	2.4e-05	7.8e-06	133.78	91.21	0.5711	0.1983	185-295	0.1094	-0.0873	201-271	0.0594	0.860684	0.903612
814020	C	T	SNP	synonymous_variant	LOW	tgC/tgT	p.Cys201Cys/c.603C>T	ybhM	EFF=synonymous_variant(LOW|SILENT|tgC/tgT|p.Cys201Cys/c.603C>T|237|ybhM|protein_coding|CODING|ACT38436|1|1),upstream_gene_variant(MODIFIER||4747||302|ybhK|protein_coding|CODING|ACT38429||1),upstream_gene_variant(MODIFIER||3235||136|ybhQ|protein_coding|CODING|ACT38440||1),downstream_gene_variant(MODIFIER||147||318|ybhN|protein_coding|CODING|ACT38437||1),downstream_gene_variant(MODIFIER||1103||413|…	6	25	COG0670	R	NO	813418	814131	+	C603T	-245.28	-243.18	8.75e-10	8.88e-10	82.36	82.37	0.4327	0	581-630	1	1	574-642	0.9997	1	1
828245	C	T	SNP	synonymous_variant	LOW	Ctg/Ttg	p.Leu125Leu/c.373C>T	ybiB	EFF=synonymous_variant(LOW|SILENT|Ctg/Ttg|p.Leu125Leu/c.373C>T|320|ybiB|protein_coding|CODING|ACT38449|1|1),upstream_gene_variant(MODIFIER||4977||223|ybiH|protein_coding|CODING|ACT38445||1),upstream_gene_variant(MODIFIER||731||361|ybiC|protein_coding|CODING|ACT38450||1),upstream_gene_variant(MODIFIER||2670||160|ybiA|protein_coding|CODING|ACT38447||1),downstream_gene_variant(MODIFIER||3384||454|rh…	27	47	COG0547	E	NO	827873	828835	+	C373T	-437.34	-437.34	7.81e-11	7.64e-11	174.65	176.02	0.5686	0.0374	330-379	0.579	0.845	325-400	0.5988	0.993951	0.961473
829071	A	G	SNP	synonymous_variant	LOW	ttA/ttG	p.Leu32Leu/c.96A>G	ybiC	EFF=synonymous_variant(LOW|SILENT|ttA/ttG|p.Leu32Leu/c.96A>G|361|ybiC|protein_coding|CODING|ACT38450|1|1),upstream_gene_variant(MODIFIER||3496||160|ybiA|protein_coding|CODING|ACT38447||1),downstream_gene_variant(MODIFIER||4210||454|rhlE|protein_coding|CODING|ACT38446||1),downstream_gene_variant(MODIFIER||1219||86|ybiJ|protein_coding|CODING|ACT38451||1),downstream_gene_variant(MODIFIER||1744||88|y…	32	262	COG2055	C	NO	828976	830061	+	A96G	-488.17	-489.54	7.8e-12	5.15e-12	117.12	124.17	0.5236	0.0203	59-108	0.7406	0.9092	70-119	0.7205	0.98858	0.986483
834906	A	G	SNP	upstream_gene_variant	MODIFIER	.	.	.	EFF=upstream_gene_variant(MODIFIER||51||308|ybiN|protein_coding|CODING|ACT38456||1),upstream_gene_variant(MODIFIER||4356||86|ybiJ|protein_coding|CODING|ACT38451||1),upstream_gene_variant(MODIFIER||3825||88|ybiI|protein_coding|CODING|ACT38452||1),upstream_gene_variant(MODIFIER||3074||225|ybiX|protein_coding|CODING|ACT38453||1),upstream_gene_variant(MODIFIER||750||760|ybiL|protein_coding|CODING|ACT…	.	.	NA	NA	.	.	.	.	.	.	.	.	.	.	.	.	.	.	.	.	.	.	.	.
835987	G	GT	INS	frameshift_variant	HIGH	aaa/aaaA	p.Lys706_His707fs/c.2118_2119insA	ybiO	EFF=frameshift_variant(HIGH||aaa/aaaA|p.Lys706_His707fs/c.2118_2119insA|741|ybiO|protein_coding|CODING|ACT38457|1|1),upstream_gene_variant(MODIFIER||4907||88|ybiI|protein_coding|CODING|ACT38452||1),upstream_gene_variant(MODIFIER||4156||225|ybiX|protein_coding|CODING|ACT38453||1),upstream_gene_variant(MODIFIER||1832||760|ybiL|protein_coding|CODING|ACT38454||1),upstream_gene_variant(MODIFIER||1307|…	1	27	COG0668	M	NO	.	.	.	.	.	.	.	.	.	.	.	.	.	.	.	.	.	.	.
838514	A	G	SNP	missense_variant	MODERATE	gTg/gCg	p.Val192Ala/c.575T>C	glnQ	EFF=missense_variant(MODERATE|MISSENSE|gTg/gCg|p.Val192Ala/c.575T>C|240|glnQ|protein_coding|CODING|ACT38458|1|1|WARNING_TRANSCRIPT_NO_START_CODON),upstream_gene_variant(MODIFIER||4358||760|ybiL|protein_coding|CODING|ACT38454||1),upstream_gene_variant(MODIFIER||3833||86|ybiM|protein_coding|CODING|ACT38455||1),upstream_gene_variant(MODIFIER||4561||171|ompX|protein_coding|CODING|ACT38463||1),upstrea…	68	219	COG1126	E	NO	838366	839088	-	T575C	-300.38	-299.54	1.14e-08	9.08e-09	232.48	164.23	0.5415	0.0473	556-605	0.5288	0.8632	556-605	0.6306	0.97664	0.947679
839898	A	G	SNP	synonymous_variant	LOW	ggT/ggC	p.Gly244Gly/c.732T>C	glnH	EFF=synonymous_variant(LOW|SILENT|ggT/ggC|p.Gly244Gly/c.732T>C|248|glnH|protein_coding|CODING|ACT38460|1|1),upstream_gene_variant(MODIFIER||3177||171|ompX|protein_coding|CODING|ACT38463||1),upstream_gene_variant(MODIFIER||1793||741|ybiO|protein_coding|CODING|ACT38457||1),upstream_gene_variant(MODIFIER||810||240|glnQ|protein_coding|CODING|ACT38458||1|WARNING_TRANSCRIPT_NO_START_CODON),upstream_gen…	228	1520	COG0834	ET	NO	839883	840629	-	T732C	-266.94	-266.94	2.18e-07	2.98e-07	153.28	148.66	0.4907	0.0243	697-746	0.5686	0.9487	698-747	0.7151	0.997372	0.982389
844589	C	T	SNP	missense_variant	MODERATE	Gtt/Att	p.Val212Ile/c.634G>A	ybiP	EFF=missense_variant(MODERATE|MISSENSE|Gtt/Att|p.Val212Ile/c.634G>A|527|ybiP|protein_coding|CODING|ACT38464|1|1),upstream_gene_variant(MODIFIER||4845||219|glnP|protein_coding|CODING|ACT38459||1),upstream_gene_variant(MODIFIER||707||89|ECB_00783|protein_coding|CODING|ACT38465||1|WARNING_TRANSCRIPT_NO_START_CODON),upstream_gene_variant(MODIFIER||3960||248|glnH|protein_coding|CODING|ACT38460||1),ups…	42	43	COG2194	R	NO	843639	845222	-	G634A	-561.78	-562.38	1.4e-18	9.74e-19	383.01	388.69	0.5037	0.0331	586-636	0.6107	0.901	586-636	0.6879	0.975544	0.922864
845968	A	G	SNP	missense_variant	MODERATE	gAa/gGa	p.Glu54Gly/c.161A>G	mntR	EFF=missense_variant(MODERATE|MISSENSE|gAa/gGa|p.Glu54Gly/c.161A>G|155|mntR|protein_coding|CODING|ACT38466|1|1),upstream_gene_variant(MODIFIER||304||372|ybiR|protein_coding|CODING|ACT38467||1),upstream_gene_variant(MODIFIER||4432||167|dps|protein_coding|CODING|ACT38461||1),upstream_gene_variant(MODIFIER||3246||295|ybiF|protein_coding|CODING|ACT38462||1),upstream_gene_variant(MODIFIER||2620||530|y…	129	134	COG1321	K	NO	845808	846275	+	A161G	-182.6	-182.49	4.37e-05	1.97e-05	122.79	157.62	0.5402	0.0967	73-166	0.2914	0.7421	224-314	0.4633	0.935254	0.956974
851938	C	T	SNP	missense_variant	MODERATE	Gac/Aac	p.Asp215Asn/c.643G>A	ybiV	EFF=missense_variant(MODERATE|MISSENSE|Gac/Aac|p.Asp215Asn/c.643G>A|271|ybiV|protein_coding|CODING|ACT38471|1|1),upstream_gene_variant(MODIFIER||3569||306|ybiS|protein_coding|CODING|ACT38468||1),upstream_gene_variant(MODIFIER||4256||220|fsa|protein_coding|CODING|ACT38474||1),upstream_gene_variant(MODIFIER||325||421|ybiU|protein_coding|CODING|ACT38470||1),downstream_gene_variant(MODIFIER||4548||37…	71	38	COG0561	R	NO	851765	852580	-	A435G-G643A	-290.89	-294.44	1.18e-09	3.93e-09	126.44	131.98	0.4759	0.0469	432-505	0.4519	0.8971	435-503	0.6568	0.968947	0.886966
852146	T	C	SNP	synonymous_variant	LOW	gtA/gtG	p.Val145Val/c.435A>G	ybiV	EFF=synonymous_variant(LOW|SILENT|gtA/gtG|p.Val145Val/c.435A>G|271|ybiV|protein_coding|CODING|ACT38471|1|1),upstream_gene_variant(MODIFIER||3777||306|ybiS|protein_coding|CODING|ACT38468||1),upstream_gene_variant(MODIFIER||4048||220|fsa|protein_coding|CODING|ACT38474||1),upstream_gene_variant(MODIFIER||533||421|ybiU|protein_coding|CODING|ACT38470||1),downstream_gene_variant(MODIFIER||4756||372|ybi…	71	38	COG0561	R	NO	851765	852580	-	A435G-G643A	-290.89	-294.44	1.18e-09	3.93e-09	126.44	131.98	0.4759	0.0469	432-505	0.4519	0.8971	435-503	0.6568	0.968947	0.886966
859439	T	C	SNP	missense_variant	MODERATE	gTt/gCt	p.Val107Ala/c.320T>C	ybiK	EFF=missense_variant(MODERATE|MISSENSE|gTt/gCt|p.Val107Ala/c.320T>C|321|ybiK|protein_coding|CODING|ACT38477|1|1),upstream_gene_variant(MODIFIER||666||612|yliA|protein_coding|CODING|ACT38478||1|WARNING_TRANSCRIPT_NO_START_CODON),upstream_gene_variant(MODIFIER||4281||810|ybiW|protein_coding|CODING|ACT38472||1),upstream_gene_variant(MODIFIER||3349||308|ybiY|protein_coding|CODING|ACT38473||1),upstrea…	29	143	COG1446	E	NO	859120	860085	+	T320C	-437.8	-439.49	4.22e-10	2.92e-10	115.95	107.56	0.5686	0.0234	282-331	0.6913	0.9289	282-332	0.742	0.997062	0.99016
863881	C	T	SNP	synonymous_variant	LOW	gcC/gcT	p.Ala121Ala/c.363C>T	yliC	EFF=synonymous_variant(LOW|SILENT|gcC/gcT|p.Ala121Ala/c.363C>T|306|yliC|protein_coding|CODING|ACT38480|1|1),upstream_gene_variant(MODIFIER||4965||411|moeA|protein_coding|CODING|ACT38476||1),upstream_gene_variant(MODIFIER||561||303|yliD|protein_coding|CODING|ACT38481||1),upstream_gene_variant(MODIFIER||1902||698|yliE|protein_coding|CODING|ACT38482||1|WARNING_TRANSCRIPT_NO_START_CODON),upstream_gen…	9	65	COG0601	EP	NO	863519	864439	+	C363T	-417.03	-414.67	4.7e-10	5.03e-10	211.1	189.15	0.5686	0.0369	279-342	0.5826	0.8187	281-342	0.563	0.992216	0.978559
866697	C	T	SNP	synonymous_variant	LOW	aaC/aaT	p.Asn305Asn/c.915C>T	yliE	EFF=synonymous_variant(LOW|SILENT|aaC/aaT|p.Asn305Asn/c.915C>T|698|yliE|protein_coding|CODING|ACT38482|1|1|WARNING_TRANSCRIPT_NO_START_CODON),upstream_gene_variant(MODIFIER||1190||442|yliF|protein_coding|CODING|ACT38483||1),upstream_gene_variant(MODIFIER||4103||127|yliH|protein_coding|CODING|ACT38485||1),upstream_gene_variant(MODIFIER||4597||371|yliI|protein_coding|CODING|ACT38486||1),downstream_…	39	24	COG2200	T	NO	865783	867879	+	C915T	-745.99	-745.43	6.46e-23	7.4e-23	292.36	298.45	0.4239	0.2091	887-936	0.0643	0.6737	887-936	0.3727	0.991802	0.988017
870297	C	T	SNP	synonymous_variant	LOW	gtG/gtA	p.Val97Val/c.291G>A	yliG	EFF=synonymous_variant(LOW|SILENT|gtG/gtA|p.Val97Val/c.291G>A|441|yliG|protein_coding|CODING|ACT38484|1|1),upstream_gene_variant(MODIFIER||503||127|yliH|protein_coding|CODING|ACT38485||1),upstream_gene_variant(MODIFIER||997||371|yliI|protein_coding|CODING|ACT38486||1),upstream_gene_variant(MODIFIER||2982||400|dacC|protein_coding|CODING|ACT38488||1),downstream_gene_variant(MODIFIER||4944||303|yliD…	246	72	COG0621	J	NO	869262	870587	-	G291A	-516.07	-516.04	2e-14	2.47e-14	402.78	400.22	0.5162	0.0011	280-402	0.971	0.9955	289-394	0.9499	0.99961	0.997812
872610	A	G	SNP	synonymous_variant	LOW	ttT/ttC	p.Phe141Phe/c.423T>C	yliJ	EFF=synonymous_variant(LOW|SILENT|ttT/ttC|p.Phe141Phe/c.423T>C|208|yliJ|protein_coding|CODING|ACT38487|1|1),upstream_gene_variant(MODIFIER||669||400|dacC|protein_coding|CODING|ACT38488||1),upstream_gene_variant(MODIFIER||2023||441|yliG|protein_coding|CODING|ACT38484||1),upstream_gene_variant(MODIFIER||3615||410|cmr|protein_coding|CODING|ACT38491||1),downstream_gene_variant(MODIFIER||4731||698|yli…	30	120	COG0625	O	NO	872406	873032	-	T423C	-238.67	-240.86	6.56e-08	9.19e-08	103.9	92.56	0.5511	0.1336	396-445	0.204	0.6726	403-452	0.4062	0.976078	0.920798
877346	C	CG	INS	frameshift_variant	HIGH	ggg/Gggg	p.Gly375_Gly376fs/c.1123_1124insG	cmr	EFF=frameshift_variant(HIGH||ggg/Gggg|p.Gly375_Gly376fs/c.1123_1124insG|410|cmr|protein_coding|CODING|ACT38491|1|1),upstream_gene_variant(MODIFIER||4315||208|yliJ|protein_coding|CODING|ACT38487||1),upstream_gene_variant(MODIFIER||2628||178|ybjK|protein_coding|CODING|ACT38495||1),upstream_gene_variant(MODIFIER||2061||252|deoR|protein_coding|CODING|ACT38489||1),upstream_gene_variant(MODIFIER||1407|…	100	49	COG0477	GEPR	NO	.	.	.	.	.	.	.	.	.	.	.	.	.	.	.	.	.	.	.
879034	G	A	SNP	synonymous_variant	LOW	gcC/gcT	p.Ala286Ala/c.858C>T	ybjJ	EFF=synonymous_variant(LOW|SILENT|gcC/gcT|p.Ala286Ala/c.858C>T|402|ybjJ|protein_coding|CODING|ACT38494|1|1),upstream_gene_variant(MODIFIER||941||178|ybjK|protein_coding|CODING|ACT38495||1),upstream_gene_variant(MODIFIER||3748||252|deoR|protein_coding|CODING|ACT38489||1),upstream_gene_variant(MODIFIER||3094||198|ybjG|protein_coding|CODING|ACT38490||1),upstream_gene_variant(MODIFIER||1252||94|ybjH|…	45	55	COG0477	GEPR	NO	878683	879891	-	C858T	-548.41	-548.96	1.45e-10	2.13e-11	218.94	305.6	0.5786	0.3429	836-1049	0.0301	-0.5983	854-907	0.0056	0.853493	0.760121
880172	C	T	SNP	synonymous_variant	LOW	atC/atT	p.Ile66Ile/c.198C>T	ybjK	EFF=synonymous_variant(LOW|SILENT|atC/atT|p.Ile66Ile/c.198C>T|178|ybjK|protein_coding|CODING|ACT38495|1|1),upstream_gene_variant(MODIFIER||4886||252|deoR|protein_coding|CODING|ACT38489||1),upstream_gene_variant(MODIFIER||4232||198|ybjG|protein_coding|CODING|ACT38490||1),upstream_gene_variant(MODIFIER||2390||94|ybjH|protein_coding|CODING|ACT38492||1),upstream_gene_variant(MODIFIER||3065||73|ECB_00…	13	29	COG3226	S	NO	879975	880511	+	C198T	-196.82	-194.59	3.12e-07	2.92e-07	99.95	113.91	0.5	0.0026	169-277	0.9425	0.9922	159-285	0.9286	0.998174	0.98679
880738	A	G	SNP	missense_variant	MODERATE	Tat/Cat	p.Tyr96His/c.286T>C	ECB_00814	EFF=missense_variant(MODERATE|MISSENSE|Tat/Cat|p.Tyr96His/c.286T>C|110|ECB_00814|protein_coding|CODING|ACT38496|1|1),upstream_gene_variant(MODIFIER||4798||198|ybjG|protein_coding|CODING|ACT38490||1),upstream_gene_variant(MODIFIER||2956||94|ybjH|protein_coding|CODING|ACT38492||1),upstream_gene_variant(MODIFIER||2499||73|ECB_00818|protein_coding|CODING|ACT38500||1),upstream_gene_variant(MODIFIER||2…	NA	NA	NA	NA	NO	880691	881023	-	T286C	-85.09	-87.06	7.55e-05	0.000137173	98.83	63.77	0.371	0.1511	154-333	0.127	0.5294	174-333	0.2716	0.946112	0.955663
881060	A	G	SNP	upstream_gene_variant	MODIFIER	.	.	.	EFF=upstream_gene_variant(MODIFIER||3278||94|ybjH|protein_coding|CODING|ACT38492||1),upstream_gene_variant(MODIFIER||2177||73|ECB_00818|protein_coding|CODING|ACT38500||1),upstream_gene_variant(MODIFIER||2431||169|ECB_00819|protein_coding|CODING|ACT38501||1),upstream_gene_variant(MODIFIER||2377||271|ybjI|protein_coding|CODING|ACT38493||1),upstream_gene_variant(MODIFIER||2909||79|ECB_00820|protein_…	.	.	NA	NA	.	.	.	.	.	.	.	.	.	.	.	.	.	.	.	.	.	.	.	.
882089	A	G	SNP	upstream_gene_variant	MODIFIER	.	.	.	EFF=upstream_gene_variant(MODIFIER||4307||94|ybjH|protein_coding|CODING|ACT38492||1),upstream_gene_variant(MODIFIER||1148||73|ECB_00818|protein_coding|CODING|ACT38500||1),upstream_gene_variant(MODIFIER||1402||169|ECB_00819|protein_coding|CODING|ACT38501||1),upstream_gene_variant(MODIFIER||3406||271|ybjI|protein_coding|CODING|ACT38493||1),upstream_gene_variant(MODIFIER||1880||79|ECB_00820|protein_…	.	.	NA	NA	.	.	.	.	.	.	.	.	.	.	.	.	.	.	.	.	.	.	.	.
882949	C	T	SNP	missense_variant	MODERATE	Gcc/Acc	p.Ala53Thr/c.157G>A	ECB_00817	EFF=missense_variant(MODERATE|MISSENSE|Gcc/Acc|p.Ala53Thr/c.157G>A|187|ECB_00817|protein_coding|CODING|ACT38499|1|1),upstream_gene_variant(MODIFIER||288||73|ECB_00818|protein_coding|CODING|ACT38500||1),upstream_gene_variant(MODIFIER||542||169|ECB_00819|protein_coding|CODING|ACT38501||1),upstream_gene_variant(MODIFIER||4266||271|ybjI|protein_coding|CODING|ACT38493||1),upstream_gene_variant(MODIFIE…	NA	NA	NA	NA	NO	882542	883105	-	G157A	-188.1	-187.09	7.58e-06	4.91e-06	129.71	98.65	0.4342	0.0403	1961-09-01	0.5357	0.7174	153-202	0.4478	0.941168	0.855772
883627	C	T	SNP	missense_variant	MODERATE	gCg/gTg	p.Ala46Val/c.137C>T	ECB_00819	EFF=missense_variant(MODERATE|MISSENSE|gCg/gTg|p.Ala46Val/c.137C>T|169|ECB_00819|protein_coding|CODING|ACT38501|1|1),upstream_gene_variant(MODIFIER||4944||271|ybjI|protein_coding|CODING|ACT38493||1),upstream_gene_variant(MODIFIER||342||79|ECB_00820|protein_coding|CODING|ACT38502||1),upstream_gene_variant(MODIFIER||545||113|ECB_00821|protein_coding|CODING|ACT38503||1),upstream_gene_variant(MODIFIE…	NA	NA	NA	NA	NO	883491	884000	+	C137T	-198.06	-200.19	3.34e-06	1.02e-05	102.97	83.68	0.4926	0.0333	53-139	0.5972	0.8031	53-137	0.5474	0.979913	0.946405
894869	GT	G	DEL	upstream_gene_variant	MODIFIER	.	.	.	EFF=upstream_gene_variant(MODIFIER||22||250|ECB_00834|protein_coding|CODING|ACT38516||1),upstream_gene_variant(MODIFIER||768||48|ECB_00835|protein_coding|CODING|ACT38517||1),upstream_gene_variant(MODIFIER||911||142|ECB_00836|protein_coding|CODING|ACT38518||1),upstream_gene_variant(MODIFIER||1182||96|ECB_00837|protein_coding|CODING|ACT38519||1|WARNING_TRANSCRIPT_NO_START_CODON),upstream_gene_varia…	.	.	NA	NA	.	.	.	.	.	.	.	.	.	.	.	.	.	.	.	.	.	.	.	.
894888	G	A	SNP	upstream_gene_variant	MODIFIER	.	.	.	EFF=upstream_gene_variant(MODIFIER||4||250|ECB_00834|protein_coding|CODING|ACT38516||1),upstream_gene_variant(MODIFIER||750||48|ECB_00835|protein_coding|CODING|ACT38517||1),upstream_gene_variant(MODIFIER||893||142|ECB_00836|protein_coding|CODING|ACT38518||1),upstream_gene_variant(MODIFIER||1164||96|ECB_00837|protein_coding|CODING|ACT38519||1|WARNING_TRANSCRIPT_NO_START_CODON),upstream_gene_varian…	.	.	NA	NA	.	.	.	.	.	.	.	.	.	.	.	.	.	.	.	.	.	.	.	.
895030	C	T	SNP	missense_variant	MODERATE	Cac/Tac	p.His47Tyr/c.139C>T	ECB_00834	EFF=missense_variant(MODERATE|MISSENSE|Cac/Tac|p.His47Tyr/c.139C>T|250|ECB_00834|protein_coding|CODING|ACT38516|1|1),upstream_gene_variant(MODIFIER||608||48|ECB_00835|protein_coding|CODING|ACT38517||1),upstream_gene_variant(MODIFIER||751||142|ECB_00836|protein_coding|CODING|ACT38518||1),upstream_gene_variant(MODIFIER||1022||96|ECB_00837|protein_coding|CODING|ACT38519||1|WARNING_TRANSCRIPT_NO_STAR…	NA	NA	NA	NA	NO	894892	895644	+	C139T	-326.57	-326.57	1.05e-07	1.11e-07	91.23	70.92	0.5516	0.0001	121-244	0.9952	0.9994	114-249	0.9847	0.97831	0.877753
896238	A	G	SNP	missense_variant	MODERATE	Acg/Gcg	p.Thr63Ala/c.187A>G	ECB_00837	EFF=missense_variant(MODERATE|MISSENSE|Acg/Gcg|p.Thr63Ala/c.187A>G|96|ECB_00837|protein_coding|CODING|ACT38519|1|1|WARNING_TRANSCRIPT_NO_START_CODON),upstream_gene_variant(MODIFIER||67||143|ECB_00838|protein_coding|CODING|ACT38520||1|WARNING_TRANSCRIPT_NO_START_CODON),upstream_gene_variant(MODIFIER||491||148|ECB_00839|protein_coding|CODING|ACT38521||1|WARNING_TRANSCRIPT_NO_START_CODON),upstream_g…	NA	NA	NA	NA	NO	896052	896342	+	A187G	-128.28	-130.33	0.0983038	0.0977182	12.78	12.5	0.5808	0.0224	191-284	0.7085	0.9082	191-263	0.7023	0.957652	0.839465
901252	G	GCC	INS	frameshift_variant	HIGH	gcc/gCCcc	p.Ala268_Pro269fs/c.803_804insCC	ECB_00845	EFF=frameshift_variant(HIGH||gcc/gCCcc|p.Ala268_Pro269fs/c.803_804insCC|540|ECB_00845|protein_coding|CODING|ACT38527|1|1),upstream_gene_variant(MODIFIER||822||145|ECB_00846|protein_coding|CODING|ACT38528||1),upstream_gene_variant(MODIFIER||3330||268|ECB_00840|protein_coding|CODING|ACT38522||1),upstream_gene_variant(MODIFIER||2403||91|ECB_00849|protein_coding|CODING|ACT38531||1),upstream_gene_vari…	NA	NA	NA	NA	NO	.	.	.	.	.	.	.	.	.	.	.	.	.	.	.	.	.	.	.
901822	T	TGG	INS	frameshift_variant	HIGH	tgg/tGGgg	p.Trp458_Gly459fs/c.1373_1374insGG	ECB_00845	EFF=frameshift_variant(HIGH||tgg/tGGgg|p.Trp458_Gly459fs/c.1373_1374insGG|540|ECB_00845|protein_coding|CODING|ACT38527|1|1),upstream_gene_variant(MODIFIER||252||145|ECB_00846|protein_coding|CODING|ACT38528||1),upstream_gene_variant(MODIFIER||3900||268|ECB_00840|protein_coding|CODING|ACT38522||1),upstream_gene_variant(MODIFIER||1833||91|ECB_00849|protein_coding|CODING|ACT38531||1),upstream_gene_va…	NA	NA	NA	NA	NO	.	.	.	.	.	.	.	.	.	.	.	.	.	.	.	.	.	.	.
902559	A	G	SNP	synonymous_variant	LOW	gaT/gaC	p.Asp176Asp/c.528T>C	tfaE	EFF=synonymous_variant(LOW|SILENT|gaT/gaC|p.Asp176Asp/c.528T>C|200|tfaE|protein_coding|CODING|ACT38529|1|1),upstream_gene_variant(MODIFIER||4636||268|ECB_00840|protein_coding|CODING|ACT38522||1),upstream_gene_variant(MODIFIER||1097||91|ECB_00849|protein_coding|CODING|ACT38531||1),upstream_gene_variant(MODIFIER||1369||122|ECB_00850|protein_coding|CODING|ACT38532||1|WARNING_TRANSCRIPT_NO_START_CODO…	2	13	NA	NA	NO	902484	903086	-	T528C	-234.38	-231.41	9.01e-06	1.32e-05	90.3	102.71	0.5399	0.0444	432-529	0.5342	0.7561	436-528	0.4737	0.986658	0.907573
907128	A	G	SNP	synonymous_variant	LOW	ttA/ttG	p.Leu111Leu/c.333A>G	ybjM	EFF=synonymous_variant(LOW|SILENT|ttA/ttG|p.Leu111Leu/c.333A>G|125|ybjM|protein_coding|CODING|ACT38535|1|1|WARNING_TRANSCRIPT_NO_START_CODON),upstream_gene_variant(MODIFIER||492||95|ybjC|protein_coding|CODING|ACT38537||1),upstream_gene_variant(MODIFIER||763||240|nfsA|protein_coding|CODING|ACT38538||1),upstream_gene_variant(MODIFIER||4042||200|tfaE|protein_coding|CODING|ACT38529||1),upstream_gene_…	14	33	COG0477	GEPR	NO	906796	907173	+	A333G	-137.55	-137.24	0.000141582	0.000125748	51.97	69.55	0.4878	0.1248	316-365	0.1824	0.1546	291-357	0.0985	0.92701	0.812521
909759	G	A	SNP	synonymous_variant	LOW	ctG/ctA	p.Leu32Leu/c.96G>A	ybjN	EFF=synonymous_variant(LOW|SILENT|ctG/ctA|p.Leu32Leu/c.96G>A|158|ybjN|protein_coding|CODING|ACT38540|1|1),upstream_gene_variant(MODIFIER||732||370|potF|protein_coding|CODING|ACT38541||1),upstream_gene_variant(MODIFIER||3233||561|ybjL|protein_coding|CODING|ACT38534||1|WARNING_TRANSCRIPT_NO_START_CODON),upstream_gene_variant(MODIFIER||1939||377|potG|protein_coding|CODING|ACT38542||1|WARNING_TRANSCR…	572	212	NA	NA	NO	909664	910140	+	G96A	-179.39	-176.18	3.12e-05	5.16e-05	104.14	69.92	0.4932	0.2225	77-129	0.0751	-0.3046	86-138	0.0259	0.853939	0.929859
916193	G	A	SNP	synonymous_variant	LOW	acG/acA	p.Thr323Thr/c.969G>A	ybjF	EFF=synonymous_variant(LOW|SILENT|acG/acA|p.Thr323Thr/c.969G>A|375|ybjF|protein_coding|CODING|ACT38546|1|1),downstream_gene_variant(MODIFIER||358||243|artJ|protein_coding|CODING|ACT38547||1),downstream_gene_variant(MODIFIER||4590||370|potF|protein_coding|CODING|ACT38541||1),downstream_gene_variant(MODIFIER||1380||222|artM|protein_coding|CODING|ACT38548||1),downstream_gene_variant(MODIFIER||3362||…	34	22	COG2265	J	NO	915225	916352	+	G969A	-468.09	-467.47	5.03e-12	5.17e-12	367.57	370.37	0.5528	0.0046	898-989	0.9039	0.9849	898-975	0.8927	0.999485	0.997177
917183	A	AG	INS	frameshift_variant	HIGH	ccc/cccC	p.Pro33_Phe34fs/c.99_100insC	artJ	EFF=frameshift_variant(HIGH||ccc/cccC|p.Pro33_Phe34fs/c.99_100insC|243|artJ|protein_coding|CODING|ACT38547|1|1),upstream_gene_variant(MODIFIER||4116||107|ybjQ|protein_coding|CODING|ACT38553||1),upstream_gene_variant(MODIFIER||4436||276|ybjR|protein_coding|CODING|ACT38554||1),downstream_gene_variant(MODIFIER||389||222|artM|protein_coding|CODING|ACT38548||1),downstream_gene_variant(MODIFIER||4353||…	34	298	COG0834	ET	NO	.	.	.	.	.	.	.	.	.	.	.	.	.	.	.	.	.	.	.
917462	C	T	SNP	upstream_gene_variant	MODIFIER	.	.	.	EFF=upstream_gene_variant(MODIFIER||3838||107|ybjQ|protein_coding|CODING|ACT38553||1),upstream_gene_variant(MODIFIER||4158||276|ybjR|protein_coding|CODING|ACT38554||1),upstream_gene_variant(MODIFIER||180||243|artJ|protein_coding|CODING|ACT38547||1),downstream_gene_variant(MODIFIER||111||222|artM|protein_coding|CODING|ACT38548||1),downstream_gene_variant(MODIFIER||4631||377|potG|protein_coding|COD…	.	.	NA	NA	.	.	.	.	.	.	.	.	.	.	.	.	.	.	.	.	.	.	.	.
919872	C	T	SNP	synonymous_variant	LOW	acG/acA	p.Thr190Thr/c.570G>A	artP	EFF=synonymous_variant(LOW|SILENT|acG/acA|p.Thr190Thr/c.570G>A|242|artP|protein_coding|CODING|ACT38551|1|1),upstream_gene_variant(MODIFIER||1428||107|ybjQ|protein_coding|CODING|ACT38553||1),upstream_gene_variant(MODIFIER||1748||276|ybjR|protein_coding|CODING|ACT38554||1),upstream_gene_variant(MODIFIER||2590||243|artJ|protein_coding|CODING|ACT38547||1),upstream_gene_variant(MODIFIER||1631||222|art…	267	185	COG4161	E	NO	919713	920441	-	G570A	-276.58	-276.58	4.36e-09	7.07e-09	225.09	232.37	0.5139	0.0175	567-616	0.7385	0.9039	567-616	0.684	0.994845	0.984896
923883	G	T	SNP	synonymous_variant	LOW	cgC/cgA	p.Arg369Arg/c.1107C>A	ybjT	EFF=synonymous_variant(LOW|SILENT|cgC/cgA|p.Arg369Arg/c.1107C>A|476|ybjT|protein_coding|CODING|ACT38556|1|1|WARNING_TRANSCRIPT_NO_START_CODON),upstream_gene_variant(MODIFIER||4926||238|artQ|protein_coding|CODING|ACT38549||1),upstream_gene_variant(MODIFIER||4188||243|artI|protein_coding|CODING|ACT38550||1),upstream_gene_variant(MODIFIER||3442||242|artP|protein_coding|CODING|ACT38551||1),upstream_g…	26	44	COG0702	MG	NO	923559	924989	-	T635C-C1107A	-619.47	-620.88	5.37e-16	9.53e-16	462.78	256.81	0.5544	0.1518	1034-1118	0.1706	0.1475	1043-1119	0.1182	0.912771	0.668172
924355	A	G	SNP	missense_variant	MODERATE	gTg/gCg	p.Val212Ala/c.635T>C	ybjT	EFF=missense_variant(MODERATE|MISSENSE|gTg/gCg|p.Val212Ala/c.635T>C|476|ybjT|protein_coding|CODING|ACT38556|1|1|WARNING_TRANSCRIPT_NO_START_CODON),upstream_gene_variant(MODIFIER||4660||243|artI|protein_coding|CODING|ACT38550||1),upstream_gene_variant(MODIFIER||3914||242|artP|protein_coding|CODING|ACT38551||1),upstream_gene_variant(MODIFIER||3181||171|ybjP|protein_coding|CODING|ACT38552||1),upstre…	26	44	COG0702	MG	NO	923559	924989	-	T635C-C1107A	-619.47	-620.88	5.37e-16	9.53e-16	462.78	256.81	0.5544	0.1518	1034-1118	0.1706	0.1475	1043-1119	0.1182	0.912771	0.668172
926610	G	A	SNP	missense_variant	MODERATE	Cca/Tca	p.Pro383Ser/c.1147C>T	poxB	EFF=missense_variant(MODERATE|MISSENSE|Cca/Tca|p.Pro383Ser/c.1147C>T|572|poxB|protein_coding|CODING|ACT38558|1|1),upstream_gene_variant(MODIFIER||3150||337|ybjS|protein_coding|CODING|ACT38555||1),upstream_gene_variant(MODIFIER||1621||476|ybjT|protein_coding|CODING|ACT38556||1|WARNING_TRANSCRIPT_NO_START_CODON),upstream_gene_variant(MODIFIER||609||333|ltaE|protein_coding|CODING|ACT38557||1),downst…	5	119	COG0028	EH	NO	926038	927756	-	C1147T	-715.42	-719.11	3.32e-18	3.27e-18	351.83	320.3	0.5436	0.2704	1112-1161	0.0567	-0.0903	1111-1160	0.0588	0.965502	0.933761
928323	C	T	SNP	missense_variant	MODERATE	Gct/Act	p.Ala179Thr/c.535G>A	hcr	EFF=missense_variant(MODERATE|MISSENSE|Gct/Act|p.Ala179Thr/c.535G>A|322|hcr|protein_coding|CODING|ACT38559|1|1),upstream_gene_variant(MODIFIER||4863||337|ybjS|protein_coding|CODING|ACT38555||1),upstream_gene_variant(MODIFIER||3334||476|ybjT|protein_coding|CODING|ACT38556||1|WARNING_TRANSCRIPT_NO_START_CODON),upstream_gene_variant(MODIFIER||2322||333|ltaE|protein_coding|CODING|ACT38557||1),upstrea…	0	12	COG1018	C	NO	927889	928857	-	G535A	-451.75	-449.1	1.02e-10	6.32e-10	165.33	291.34	0.5486	0.173	521-733	0.1389	0.478	523-709	0.2642	0.82123	0.712031
928903	A	G	SNP	missense_variant	MODERATE	gTt/gCt	p.Val540Ala/c.1619T>C	hcp	EFF=missense_variant(MODERATE|MISSENSE|gTt/gCt|p.Val540Ala/c.1619T>C|550|hcp|protein_coding|CODING|ACT38560|1|1),upstream_gene_variant(MODIFIER||3914||476|ybjT|protein_coding|CODING|ACT38556||1|WARNING_TRANSCRIPT_NO_START_CODON),upstream_gene_variant(MODIFIER||2902||333|ltaE|protein_coding|CODING|ACT38557||1),upstream_gene_variant(MODIFIER||1147||572|poxB|protein_coding|CODING|ACT38558||1),upstre…	0	15	COG1151	C	NO	928869	930521	-	T1619C	-668.41	-669.39	3.83e-18	3.04e-18	383.36	394.09	0.5404	0.0485	1423-1649	0.4626	0.8569	1426-1567	0.5647	0.994937	0.993478
930891	G	A	SNP	missense_variant	MODERATE	gCg/gTg	p.Ala225Val/c.674C>T	ybjE	EFF=missense_variant(MODERATE|MISSENSE|gCg/gTg|p.Ala225Val/c.674C>T|299|ybjE|protein_coding|CODING|ACT38561|1|1),upstream_gene_variant(MODIFIER||4890||333|ltaE|protein_coding|CODING|ACT38557||1),upstream_gene_variant(MODIFIER||3135||572|poxB|protein_coding|CODING|ACT38558||1),upstream_gene_variant(MODIFIER||2288||552|ybjD|protein_coding|CODING|ACT38563||1),upstream_gene_variant(MODIFIER||2034||32…	43	65	COG2431	S	NO	.	.	.	.	.	.	.	.	.	.	.	.	.	.	.	.	.	.	.
931273	G	GT	INS	frameshift_variant	HIGH	aaa/aaaA	p.Lys97_Leu98fs/c.291_292insA	ybjE	EFF=frameshift_variant(HIGH||aaa/aaaA|p.Lys97_Leu98fs/c.291_292insA|299|ybjE|protein_coding|CODING|ACT38561|1|1),upstream_gene_variant(MODIFIER||3518||572|poxB|protein_coding|CODING|ACT38558||1),upstream_gene_variant(MODIFIER||1905||552|ybjD|protein_coding|CODING|ACT38563||1),upstream_gene_variant(MODIFIER||2417||322|hcr|protein_coding|CODING|ACT38559||1),upstream_gene_variant(MODIFIER||753||550|…	43	65	COG2431	S	NO	.	.	.	.	.	.	.	.	.	.	.	.	.	.	.	.	.	.	.
936130	G	A	SNP	missense_variant	MODERATE	Gtg/Atg	p.Val64Met/c.190G>A	macA	EFF=missense_variant(MODERATE|MISSENSE|Gtg/Atg|p.Val64Met/c.190G>A|371|macA|protein_coding|CODING|ACT38565|1|1),upstream_gene_variant(MODIFIER||4566||299|ybjE|protein_coding|CODING|ACT38561||1),upstream_gene_variant(MODIFIER||923||648|macB|protein_coding|CODING|ACT38566||1),upstream_gene_variant(MODIFIER||3376||231|aqpZ|protein_coding|CODING|ACT38562||1),upstream_gene_variant(MODIFIER||3489||106|…	16	53	COG0845	M	NO	935941	937056	+	G190A	-455.5	-452.24	2.93e-13	3.08e-13	336.49	338.29	0.5436	0.059	129-190	0.4457	0.7535	129-190	0.4879	0.982727	0.997915
939272	A	G	SNP	missense_variant	MODERATE	Ttc/Ctc	p.Phe9Leu/c.25T>C	cspD	EFF=missense_variant(MODERATE|MISSENSE|Ttc/Ctc|p.Phe9Leu/c.25T>C|74|cspD|protein_coding|CODING|ACT38567|1|1),upstream_gene_variant(MODIFIER||347||106|clpS|protein_coding|CODING|ACT38568||1),upstream_gene_variant(MODIFIER||841||710|clpA|protein_coding|CODING|ACT38569||1|WARNING_TRANSCRIPT_NO_START_CODON),upstream_gene_variant(MODIFIER||3446||330|ybjX|protein_coding|CODING|ACT38564||1),downstream_g…	91	3136	COG1278	K	NO	939072	939296	-	T25C	-73.47	-75.28	0.00570348	0.00516635	39.3	42.37	0.4844	0.0207	1959-09-01	0.6375	0.7383	1959-09-01	0.3966	0.963049	0.949662
940469	A	G	SNP	synonymous_variant	LOW	gaA/gaG	p.Glu119Glu/c.357A>G	clpA	EFF=synonymous_variant(LOW|SILENT|gaA/gaG|p.Glu119Glu/c.357A>G|710|clpA|protein_coding|CODING|ACT38569|1|1|WARNING_TRANSCRIPT_NO_START_CODON),upstream_gene_variant(MODIFIER||4643||330|ybjX|protein_coding|CODING|ACT38564||1),upstream_gene_variant(MODIFIER||1173||74|cspD|protein_coding|CODING|ACT38567||1),downstream_gene_variant(MODIFIER||3413||371|macA|protein_coding|CODING|ACT38565||1),downstream…	109	300	COG0542	O	NO	940113	942245	+	A357G-G1038A-C1408T	-913.56	-913.48	2.6e-22	5.95e-23	439.25	407.26	0.522	0.3864	995-1044	0.0208	0.3705	1002-1051	0.2062	0.979086
941150	G	A	SNP	synonymous_variant	LOW	ctG/ctA	p.Leu346Leu/c.1038G>A	clpA	EFF=synonymous_variant(LOW|SILENT|ctG/ctA|p.Leu346Leu/c.1038G>A|710|clpA|protein_coding|CODING|ACT38569|1|1|WARNING_TRANSCRIPT_NO_START_CODON),upstream_gene_variant(MODIFIER||1854||74|cspD|protein_coding|CODING|ACT38567||1),downstream_gene_variant(MODIFIER||4094||371|macA|protein_coding|CODING|ACT38565||1),downstream_gene_variant(MODIFIER||1793|||serW|tRNA|NON_CODING|ECB_t00022||1),downstream_gen…	109	300	COG0542	O	NO	940113	942245	+	A357G-G1038A-C1408T	-913.56	-913.48	2.6e-22	5.95e-23	439.25	407.26	0.522	0.3864	995-1044	0.0208	0.3705	1002-1051	0.2062	0.979086
941520	C	T	SNP	missense_variant	MODERATE	Cgc/Tgc	p.Arg470Cys/c.1408C>T	clpA	EFF=missense_variant(MODERATE|MISSENSE|Cgc/Tgc|p.Arg470Cys/c.1408C>T|710|clpA|protein_coding|CODING|ACT38569|1|1|WARNING_TRANSCRIPT_NO_START_CODON),upstream_gene_variant(MODIFIER||2224||74|cspD|protein_coding|CODING|ACT38567||1),downstream_gene_variant(MODIFIER||4464||371|macA|protein_coding|CODING|ACT38565||1),downstream_gene_variant(MODIFIER||1423|||serW|tRNA|NON_CODING|ECB_t00022||1),downstrea…	109	300	COG0542	O	NO	940113	942245	+	A357G-G1038A-C1408T	-913.56	-913.48	2.6e-22	5.95e-23	439.25	407.26	0.522	0.3864	995-1044	0.0208	0.3705	1002-1051	0.2062	0.979086
942702	A	AC	INS	upstream_gene_variant	MODIFIER	.	.	.	EFF=upstream_gene_variant(MODIFIER||3407||74|cspD|protein_coding|CODING|ACT38567||1),downstream_gene_variant(MODIFIER||240|||serW|tRNA|NON_CODING|ECB_t00022||1),downstream_gene_variant(MODIFIER||580||72|infA|protein_coding|CODING|ACT38570||1),downstream_gene_variant(MODIFIER||1083||234|aat|protein_coding|CODING|ACT38571||1),downstream_gene_variant(MODIFIER||3704||648|macB|protein_coding|CODING|AC…	.	.	NA	NA	.	.	.	.	.	.	.	.	.	.	.	.	.	.	.	.	.	.	.	.
944236	C	T	SNP	synonymous_variant	LOW	tcG/tcA	p.Ser85Ser/c.255G>A	aat	EFF=synonymous_variant(LOW|SILENT|tcG/tcA|p.Ser85Ser/c.255G>A|234|aat|protein_coding|CODING|ACT38571|1|1),upstream_gene_variant(MODIFIER||4940||74|cspD|protein_coding|CODING|ACT38567||1),upstream_gene_variant(MODIFIER||1206|||serW|tRNA|NON_CODING|ECB_t00022||1),upstream_gene_variant(MODIFIER||735||72|infA|protein_coding|CODING|ACT38570||1),downstream_gene_variant(MODIFIER||296||573|cydC|protein_c…	56	75	COG2360	O	NO	943786	944490	-	G255A	-286.44	-287.3	4.86e-08	7.63e-08	138.4	133.97	0.5661	0.0132	228-277	0.7965	0.9652	232-281	0.83	0.997273	0.977234
946011	A	G	SNP	synonymous_variant	LOW	cgT/cgC	p.Arg81Arg/c.243T>C	cydC	EFF=synonymous_variant(LOW|SILENT|cgT/cgC|p.Arg81Arg/c.243T>C|573|cydC|protein_coding|CODING|ACT38572|1|1),upstream_gene_variant(MODIFIER||2981|||serW|tRNA|NON_CODING|ECB_t00022||1),upstream_gene_variant(MODIFIER||2510||72|infA|protein_coding|CODING|ACT38570||1),upstream_gene_variant(MODIFIER||1521||234|aat|protein_coding|CODING|ACT38571||1),upstream_gene_variant(MODIFIER||3642||164|lrp|protein_c…	56	51	COG4987	CO	NO	944532	946253	-	G147A-T243C	-735.14	-734.19	5.34e-14	4.35e-14	207.49	202.04	0.5621	0.1592	115-164	0.1687	0.9172	109-163	0.7267	0.995823	0.995333
946107	C	T	SNP	synonymous_variant	LOW	gcG/gcA	p.Ala49Ala/c.147G>A	cydC	EFF=synonymous_variant(LOW|SILENT|gcG/gcA|p.Ala49Ala/c.147G>A|573|cydC|protein_coding|CODING|ACT38572|1|1),upstream_gene_variant(MODIFIER||3077|||serW|tRNA|NON_CODING|ECB_t00022||1),upstream_gene_variant(MODIFIER||2606||72|infA|protein_coding|CODING|ACT38570||1),upstream_gene_variant(MODIFIER||1617||234|aat|protein_coding|CODING|ACT38571||1),upstream_gene_variant(MODIFIER||3546||164|lrp|protein_c…	56	51	COG4987	CO	NO	944532	946253	-	G147A-T243C	-735.14	-734.19	5.34e-14	4.35e-14	207.49	202.04	0.5621	0.1592	115-164	0.1687	0.9172	109-163	0.7267	0.995823	0.995333
950762	A	G	SNP	missense_variant	MODERATE	Agc/Ggc	p.Ser161Gly/c.481A>G	ftsK	EFF=missense_variant(MODERATE|MISSENSE|Agc/Ggc|p.Ser161Gly/c.481A>G|1342|ftsK|protein_coding|CODING|ACT38576|1|1),upstream_gene_variant(MODIFIER||4509||573|cydC|protein_coding|CODING|ACT38572||1),upstream_gene_variant(MODIFIER||2742||588|cydD|protein_coding|CODING|ACT38573||1),upstream_gene_variant(MODIFIER||1654||321|trxB|protein_coding|CODING|ACT38574||1),upstream_gene_variant(MODIFIER||3700||2…	160	100	COG1674	D	YES	950282	954310	+	A481G	-1719.15	-1718.9	6.5e-41	6.21e-41	828.89	882.19	0.5062	0.0008	452-501	0.9788	0.9986	451-501	0.9749	0.97736	0.878496
954338	A	G	SNP	upstream_gene_variant	MODIFIER	.	.	.	EFF=upstream_gene_variant(MODIFIER||124||204|lolA|protein_coding|CODING|ACT38577||1),upstream_gene_variant(MODIFIER||749||447|ycaJ|protein_coding|CODING|ACT38578||1|WARNING_TRANSCRIPT_NO_START_CODON),upstream_gene_variant(MODIFIER||2183||430|serS|protein_coding|CODING|ACT38579||1),upstream_gene_variant(MODIFIER||3714||814|dmsA|protein_coding|CODING|ACT38580||1),downstream_gene_variant(MODIFIER||4…	.	.	NA	NA	.	.	.	.	.	.	.	.	.	.	.	.	.	.	.	.	.	.	.	.
957259	C	T	SNP	missense_variant	MODERATE	Cgc/Tgc	p.Arg247Cys/c.739C>T	serS	EFF=missense_variant(MODERATE|MISSENSE|Cgc/Tgc|p.Arg247Cys/c.739C>T|430|serS|protein_coding|CODING|ACT38579|1|1),upstream_gene_variant(MODIFIER||793||814|dmsA|protein_coding|CODING|ACT38580||1),upstream_gene_variant(MODIFIER||3248||205|dmsB|protein_coding|CODING|ACT38581||1),upstream_gene_variant(MODIFIER||3867||287|dmsC|protein_coding|CODING|ACT38582||1),downstream_gene_variant(MODIFIER||2949||1…	647	276	COG0172	J	YES	956521	957813	+	C739T	-527.64	-529.04	1.38e-15	1.05e-14	200	245.08	0.5262	0.0814	711-792	0.3501	0.6882	727-789	0.4204	0.911349	0.883159
958375	T	C	SNP	synonymous_variant	LOW	cgT/cgC	p.Arg108Arg/c.324T>C	dmsA	EFF=synonymous_variant(LOW|SILENT|cgT/cgC|p.Arg108Arg/c.324T>C|814|dmsA|protein_coding|CODING|ACT38580|1|1),upstream_gene_variant(MODIFIER||2132||205|dmsB|protein_coding|CODING|ACT38581||1),upstream_gene_variant(MODIFIER||2751||287|dmsC|protein_coding|CODING|ACT38582||1),upstream_gene_variant(MODIFIER||4589||382|ycaD|protein_coding|CODING|ACT38584||1),downstream_gene_variant(MODIFIER||4065||1342|…	1	17	COG0243	C	NO	958052	960496	+	T324C-C1518T	-1020.4	-1019.45	1.41e-24	9e-25	490.22	501.23	0.5329	0.2795	1345-1394	0.0523	-0.0954	1231-1345	0.0578	0.815784
959569	C	T	SNP	synonymous_variant	LOW	tgC/tgT	p.Cys506Cys/c.1518C>T	dmsA	EFF=synonymous_variant(LOW|SILENT|tgC/tgT|p.Cys506Cys/c.1518C>T|814|dmsA|protein_coding|CODING|ACT38580|1|1),upstream_gene_variant(MODIFIER||938||205|dmsB|protein_coding|CODING|ACT38581||1),upstream_gene_variant(MODIFIER||1557||287|dmsC|protein_coding|CODING|ACT38582||1),upstream_gene_variant(MODIFIER||3395||382|ycaD|protein_coding|CODING|ACT38584||1),upstream_gene_variant(MODIFIER||4753||476|yca…	1	17	COG0243	C	NO	958052	960496	+	T324C-C1518T	-1020.4	-1019.45	1.41e-24	9e-25	490.22	501.23	0.5329	0.2795	1345-1394	0.0523	-0.0954	1231-1345	0.0578	0.815784
966914	A	G	SNP	missense_variant	MODERATE	Acg/Gcg	p.Thr52Ala/c.154A>G	ycaK	EFF=missense_variant(MODERATE|MISSENSE|Acg/Gcg|p.Thr52Ala/c.154A>G|196|ycaK|protein_coding|CODING|ACT38587|1|1),upstream_gene_variant(MODIFIER||4264||208|ycaC|protein_coding|CODING|ACT38583||1),upstream_gene_variant(MODIFIER||253||302|ycaN|protein_coding|CODING|ACT38586||1),downstream_gene_variant(MODIFIER||4925||287|dmsC|protein_coding|CODING|ACT38582||1),downstream_gene_variant(MODIFIER||519||2…	10	66	COG2249	R	NO	966761	967351	+	A154G	-211.79	-212.13	3.29e-07	3.87e-07	94.42	94.56	0.4492	0.0004	113-162	0.986	0.9985	101-156	0.9741	0.956203	0.941837
968494	G	A	SNP	synonymous_variant	LOW	gaC/gaT	p.Asp718Asp/c.2154C>T	pflB	EFF=synonymous_variant(LOW|SILENT|gaC/gaT|p.Asp718Asp/c.2154C>T|760|pflB|protein_coding|CODING|ACT38589|1|1),upstream_gene_variant(MODIFIER||1833||302|ycaN|protein_coding|CODING|ACT38586||1),upstream_gene_variant(MODIFIER||321||246|pflA|protein_coding|CODING|ACT38588||1),downstream_gene_variant(MODIFIER||4382||382|ycaD|protein_coding|CODING|ACT38584||1),downstream_gene_variant(MODIFIER||2208||285…	498	1167	COG1882	C	NO	.	.	.	.	.	.	.	.	.	.	.	.	.	.	.	.	.	.	.
970117	A	G	SNP	synonymous_variant	LOW	cgT/cgC	p.Arg177Arg/c.531T>C	pflB	EFF=synonymous_variant(LOW|SILENT|cgT/cgC|p.Arg177Arg/c.531T>C|760|pflB|protein_coding|CODING|ACT38589|1|1),upstream_gene_variant(MODIFIER||3456||302|ycaN|protein_coding|CODING|ACT38586||1),upstream_gene_variant(MODIFIER||1944||246|pflA|protein_coding|CODING|ACT38588||1),upstream_gene_variant(MODIFIER||3737||230|ycaP|protein_coding|CODING|ACT38592||1),upstream_gene_variant(MODIFIER||4628||362|ser…	498	1167	COG1882	C	NO	.	.	.	.	.	.	.	.	.	.	.	.	.	.	.	.	.	.	.
970238	A	AT	INS	frameshift_variant	HIGH	atc/aAtc	p.Ile137_Phe138fs/c.409_410insA	pflB	EFF=frameshift_variant(HIGH||atc/aAtc|p.Ile137_Phe138fs/c.409_410insA|760|pflB|protein_coding|CODING|ACT38589|1|1),upstream_gene_variant(MODIFIER||3578||302|ycaN|protein_coding|CODING|ACT38586||1),upstream_gene_variant(MODIFIER||2066||246|pflA|protein_coding|CODING|ACT38588||1),upstream_gene_variant(MODIFIER||3615||230|ycaP|protein_coding|CODING|ACT38592||1),upstream_gene_variant(MODIFIER||4506||…	498	1167	COG1882	C	NO	.	.	.	.	.	.	.	.	.	.	.	.	.	.	.	.	.	.	.
971387	C	T	SNP	missense_variant	MODERATE	gGc/gAc	p.Gly58Asp/c.173G>A	focA	EFF=missense_variant(MODERATE|MISSENSE|gGc/gAc|p.Gly58Asp/c.173G>A|285|focA|protein_coding|CODING|ACT38590|1|1|WARNING_TRANSCRIPT_NO_START_CODON),upstream_gene_variant(MODIFIER||4726||302|ycaN|protein_coding|CODING|ACT38586||1),upstream_gene_variant(MODIFIER||3214||246|pflA|protein_coding|CODING|ACT38588||1),upstream_gene_variant(MODIFIER||2467||230|ycaP|protein_coding|CODING|ACT38592||1),upstrea…	117	264	COG2116	P	NO	970702	971559	-	G173A	-320.39	-321.41	2.11e-09	3.98e-09	283.51	258.44	0.5013	0.0104	160-297	0.8405	0.9699	162-293	0.852	0.948381	0.952891
973133	A	G	SNP	missense_variant	MODERATE	Tct/Cct	p.Ser198Pro/c.592T>C	ycaO	EFF=missense_variant(MODERATE|MISSENSE|Tct/Cct|p.Ser198Pro/c.592T>C|586|ycaO|protein_coding|CODING|ACT38591|1|1),upstream_gene_variant(MODIFIER||4960||246|pflA|protein_coding|CODING|ACT38588||1),upstream_gene_variant(MODIFIER||721||230|ycaP|protein_coding|CODING|ACT38592||1),upstream_gene_variant(MODIFIER||1612||362|serC|protein_coding|CODING|ACT38593||1),upstream_gene_variant(MODIFIER||2486||760…	312	61	COG1944	S	NO	971964	973724	-	T592C	-705.66	-707.31	4.38e-20	5.19e-20	296.28	309.11	0.5162	0.1501	543-595	0.1735	0.3222	533-595	0.1839	0.930111	0.856805
977249	G	GT	INS	upstream_gene_variant	MODIFIER	.	.	.	EFF=upstream_gene_variant(MODIFIER||106||254|ycaL|protein_coding|CODING|ACT38595||1),upstream_gene_variant(MODIFIER||1043||227|cmk|protein_coding|CODING|ACT38596||1),upstream_gene_variant(MODIFIER||3526||586|ycaO|protein_coding|CODING|ACT38591||1),upstream_gene_variant(MODIFIER||1837||557|rpsA|protein_coding|CODING|ACT38597||1),upstream_gene_variant(MODIFIER||3670||94|himD|protein_coding|CODING|A…	.	.	NA	NA	.	.	.	.	.	.	.	.	.	.	.	.	.	.	.	.	.	.	.	.
979996	G	A	SNP	missense_variant	MODERATE	Gta/Ata	p.Val304Ile/c.910G>A	rpsA	EFF=missense_variant(MODERATE|MISSENSE|Gta/Ata|p.Val304Ile/c.910G>A|557|rpsA|protein_coding|CODING|ACT38597|1|1),upstream_gene_variant(MODIFIER||924||94|himD|protein_coding|CODING|ACT38598||1),upstream_gene_variant(MODIFIER||1416||754|ycaI|protein_coding|CODING|ACT38599||1),upstream_gene_variant(MODIFIER||3717||582|msbA|protein_coding|CODING|ACT38600||1),downstream_gene_variant(MODIFIER||4163||36…	9436	1606	COG0539	J	YES	979087	980760	+	G910A	-665.01	-663.59	5.81e-19	1.66e-19	445.04	290.37	0.5187	0.1578	760-936	0.1609	0.156	848-929	0.1209	0.999216	0.977122
981105	T	C	SNP	synonymous_variant	LOW	cgT/cgC	p.Arg62Arg/c.186T>C	himD	EFF=synonymous_variant(LOW|SILENT|cgT/cgC|p.Arg62Arg/c.186T>C|94|himD|protein_coding|CODING|ACT38598|1|1),upstream_gene_variant(MODIFIER||307||754|ycaI|protein_coding|CODING|ACT38599||1),upstream_gene_variant(MODIFIER||2608||582|msbA|protein_coding|CODING|ACT38600||1),upstream_gene_variant(MODIFIER||4353||328|lpxK|protein_coding|CODING|ACT38601||1),downstream_gene_variant(MODIFIER||3918||427|aroA…	767	787	COG0776	L	NO	980920	981204	+	T186C	-88.51	-88.51	0.00228778	0.00046543	73	65.79	0.4912	0.0126	136-203	0.7692	0.9749	102-203	0.8492	0.985801	0.915435
985938	A	G	SNP	missense_variant	MODERATE	Att/Gtt	p.Ile161Val/c.481A>G	lpxK	EFF=missense_variant(MODERATE|MISSENSE|Att/Gtt|p.Ile161Val/c.481A>G|328|lpxK|protein_coding|CODING|ACT38601|1|1),upstream_gene_variant(MODIFIER||543||410|ycaQ|protein_coding|CODING|ACT38602||1),upstream_gene_variant(MODIFIER||1827||60|ycaR|protein_coding|CODING|ACT38603||1),upstream_gene_variant(MODIFIER||2006||248|kdsB|protein_coding|CODING|ACT38604||1),upstream_gene_variant(MODIFIER||2906||297|…	61	26	COG1663	M	YES	985458	986444	+	A481G	-462.43	-459.65	9.21e-10	1.24e-10	273.28	282.86	0.5586	0.2761	435-489	0.0539	0.6136	439-488	0.3569	0.980334	0.970643
988991	A	G	SNP	missense_variant	MODERATE	Acg/Gcg	p.Thr50Ala/c.148A>G	ycbJ	EFF=missense_variant(MODERATE|MISSENSE|Acg/Gcg|p.Thr50Ala/c.148A>G|297|ycbJ|protein_coding|CODING|ACT38605|1|1),upstream_gene_variant(MODIFIER||1638||261|smtA|protein_coding|CODING|ACT38607||1),upstream_gene_variant(MODIFIER||2420||440|mukF|protein_coding|CODING|ACT38608||1),upstream_gene_variant(MODIFIER||3750||225|mukE|protein_coding|CODING|ACT38609||1),upstream_gene_variant(MODIFIER||4427||148…	5	39	NA	NA	NO	988844	989737	+	A148G-A572G	-362.13	-362.46	4.88e-11	2.01e-11	191.34	230.99	0.5272	0.0091	199-272	0.8569	0.9732	153-272	0.858	0.991252	0.97812
989415	A	G	SNP	missense_variant	MODERATE	gAc/gGc	p.Asp191Gly/c.572A>G	ycbJ	EFF=missense_variant(MODERATE|MISSENSE|gAc/gGc|p.Asp191Gly/c.572A>G|297|ycbJ|protein_coding|CODING|ACT38605|1|1),upstream_gene_variant(MODIFIER||1214||261|smtA|protein_coding|CODING|ACT38607||1),upstream_gene_variant(MODIFIER||1996||440|mukF|protein_coding|CODING|ACT38608||1),upstream_gene_variant(MODIFIER||3326||225|mukE|protein_coding|CODING|ACT38609||1),upstream_gene_variant(MODIFIER||4003||14…	5	39	NA	NA	NO	988844	989737	+	A148G-A572G	-362.13	-362.46	4.88e-11	2.01e-11	191.34	230.99	0.5272	0.0091	199-272	0.8569	0.9732	153-272	0.858	0.991252	0.97812
990122	C	T	SNP	synonymous_variant	LOW	ctG/ctA	p.Leu124Leu/c.372G>A	ycbC	EFF=synonymous_variant(LOW|SILENT|ctG/ctA|p.Leu124Leu/c.372G>A|259|ycbC|protein_coding|CODING|ACT38606|1|1),upstream_gene_variant(MODIFIER||507||261|smtA|protein_coding|CODING|ACT38607||1),upstream_gene_variant(MODIFIER||1289||440|mukF|protein_coding|CODING|ACT38608||1),upstream_gene_variant(MODIFIER||2619||225|mukE|protein_coding|CODING|ACT38609||1),upstream_gene_variant(MODIFIER||3296||1486|muk…	23	55	COG1434	S	NO	989714	990493	-	G372A	-321.15	-319.24	5.75e-08	4.6e-08	202.16	179.12	0.5287	0.1558	330-379	0.1641	0.4998	330-383	0.2774	0.964437	0.970454
992050	A	G	SNP	missense_variant	MODERATE	Acg/Gcg	p.Thr214Ala/c.640A>G	mukF	EFF=missense_variant(MODERATE|MISSENSE|Acg/Gcg|p.Thr214Ala/c.640A>G|440|mukF|protein_coding|CODING|ACT38608|1|1),upstream_gene_variant(MODIFIER||691||225|mukE|protein_coding|CODING|ACT38609||1),upstream_gene_variant(MODIFIER||1368||1486|mukB|protein_coding|CODING|ACT38610||1),upstream_gene_variant(MODIFIER||1557||259|ycbC|protein_coding|CODING|ACT38606||1),downstream_gene_variant(MODIFIER||4337||…	66	37	COG3006	D	YES	991411	992733	+	A640G-A1211G	-564.35	-564.43	8.13e-12	3.2e-12	273.63	275.9	0.509	0.066	1202-1280	0.415	0.7611	1154-1280	0.494	0.959683	0.911871
992621	A	G	SNP	missense_variant	MODERATE	cAg/cGg	p.Gln404Arg/c.1211A>G	mukF	EFF=missense_variant(MODERATE|MISSENSE|cAg/cGg|p.Gln404Arg/c.1211A>G|440|mukF|protein_coding|CODING|ACT38608|1|1),upstream_gene_variant(MODIFIER||120||225|mukE|protein_coding|CODING|ACT38609||1),upstream_gene_variant(MODIFIER||797||1486|mukB|protein_coding|CODING|ACT38610||1),upstream_gene_variant(MODIFIER||2128||259|ycbC|protein_coding|CODING|ACT38606||1),downstream_gene_variant(MODIFIER||4908||…	66	37	COG3006	D	YES	991411	992733	+	A640G-A1211G	-564.35	-564.43	8.13e-12	3.2e-12	273.63	275.9	0.509	0.066	1202-1280	0.415	0.7611	1154-1280	0.494	0.959683	0.911871
993614	C	T	SNP	missense_variant	MODERATE	gCc/gTc	p.Ala66Val/c.197C>T	mukB	EFF=missense_variant(MODERATE|MISSENSE|gCc/gTc|p.Ala66Val/c.197C>T|1486|mukB|protein_coding|CODING|ACT38610|1|1),upstream_gene_variant(MODIFIER||3121||259|ycbC|protein_coding|CODING|ACT38606||1),upstream_gene_variant(MODIFIER||4525||615|ycbB|protein_coding|CODING|ACT38611||1),downstream_gene_variant(MODIFIER||4924||248|kdsB|protein_coding|CODING|ACT38604||1),downstream_gene_variant(MODIFIER||3877…	161	74	COG3096	D	YES	993418	997878	+	C197T-A1173G	-2010.77	-2012.45	4.59e-41	7.05e-41	866.03	914.11	0.5703	0.0273	1163-1212	0.6494	0.9366	124-197	0.7574	0.99122
994590	A	G	SNP	synonymous_variant	LOW	gaA/gaG	p.Glu391Glu/c.1173A>G	mukB	EFF=synonymous_variant(LOW|SILENT|gaA/gaG|p.Glu391Glu/c.1173A>G|1486|mukB|protein_coding|CODING|ACT38610|1|1),upstream_gene_variant(MODIFIER||4097||259|ycbC|protein_coding|CODING|ACT38606||1),upstream_gene_variant(MODIFIER||3549||615|ycbB|protein_coding|CODING|ACT38611||1),downstream_gene_variant(MODIFIER||4853||297|ycbJ|protein_coding|CODING|ACT38605||1),downstream_gene_variant(MODIFIER||3176||2…	161	74	COG3096	D	YES	993418	997878	+	C197T-A1173G	-2010.77	-2012.45	4.59e-41	7.05e-41	866.03	914.11	0.5703	0.0273	1163-1212	0.6494	0.9366	124-197	0.7574	0.99122
998936	C	CGG	INS	frameshift_variant	HIGH	ggg/GGggg	p.Gly267_Gly268fs/c.799_800insGG	ycbB	EFF=frameshift_variant(HIGH||ggg/GGggg|p.Gly267_Gly268fs/c.799_800insGG|615|ycbB|protein_coding|CODING|ACT38611|1|1),upstream_gene_variant(MODIFIER||1230||182|ycbK|protein_coding|CODING|ACT38612||1),upstream_gene_variant(MODIFIER||1805||215|ycbL|protein_coding|CODING|ACT38613||1),downstream_gene_variant(MODIFIER||2674||396|aspC|protein_coding|CODING|ACT38614||1),downstream_gene_variant(MODIFIER||…	42	99	NA	NA	NO	.	.	.	.	.	.	.	.	.	.	.	.	.	.	.	.	.	.	.
999161	C	T	SNP	synonymous_variant	LOW	ggC/ggT	p.Gly341Gly/c.1023C>T	ycbB	EFF=synonymous_variant(LOW|SILENT|ggC/ggT|p.Gly341Gly/c.1023C>T|615|ycbB|protein_coding|CODING|ACT38611|1|1),upstream_gene_variant(MODIFIER||1006||182|ycbK|protein_coding|CODING|ACT38612||1),upstream_gene_variant(MODIFIER||1581||215|ycbL|protein_coding|CODING|ACT38613||1),downstream_gene_variant(MODIFIER||2450||396|aspC|protein_coding|CODING|ACT38614||1),downstream_gene_variant(MODIFIER||1283||14…	42	99	NA	NA	NO	.	.	.	.	.	.	.	.	.	.	.	.	.	.	.	.	.	.	.
999174	G	A	SNP	missense_variant	MODERATE	Gac/Aac	p.Asp346Asn/c.1036G>A	ycbB	EFF=missense_variant(MODERATE|MISSENSE|Gac/Aac|p.Asp346Asn/c.1036G>A|615|ycbB|protein_coding|CODING|ACT38611|1|1),upstream_gene_variant(MODIFIER||993||182|ycbK|protein_coding|CODING|ACT38612||1),upstream_gene_variant(MODIFIER||1568||215|ycbL|protein_coding|CODING|ACT38613||1),downstream_gene_variant(MODIFIER||2437||396|aspC|protein_coding|CODING|ACT38614||1),downstream_gene_variant(MODIFIER||1296…	42	99	NA	NA	NO	.	.	.	.	.	.	.	.	.	.	.	.	.	.	.	.	.	.	.
1000283	T	C	SNP	synonymous_variant	LOW	atT/atC	p.Ile39Ile/c.117T>C	ycbK	EFF=synonymous_variant(LOW|SILENT|atT/atC|p.Ile39Ile/c.117T>C|182|ycbK|protein_coding|CODING|ACT38612|1|1),upstream_gene_variant(MODIFIER||459||215|ycbL|protein_coding|CODING|ACT38613||1),downstream_gene_variant(MODIFIER||1328||396|aspC|protein_coding|CODING|ACT38614||1),downstream_gene_variant(MODIFIER||2405||1486|mukB|protein_coding|CODING|ACT38610||1),downstream_gene_variant(MODIFIER||2703||36…	313	374	COG3108	S	NO	1000167	1000715	+	T117C	-203.6	-202.8	6.99e-06	6.48e-06	98.55	98.68	0.511	0.0002	110-159	0.995	0.9992	102-151	0.9837	0.999911	0.999905
1004093	GT	G	DEL	upstream_gene_variant	MODIFIER	.	.	.	EFF=upstream_gene_variant(MODIFIER||3619||870|pepN|protein_coding|CODING|ACT38618||1),upstream_gene_variant(MODIFIER||1293||396|aspC|protein_coding|CODING|ACT38614||1),upstream_gene_variant(MODIFIER||20||362|ompF|protein_coding|CODING|ACT38615||1),downstream_gene_variant(MODIFIER||582||466|asnS|protein_coding|CODING|ACT38616||1),downstream_gene_variant(MODIFIER||4108||615|ycbB|protein_coding|CODI…	.	.	NA	NA	.	.	.	.	.	.	.	.	.	.	.	.	.	.	.	.	.	.	.	.
1004385	T	C	SNP	upstream_gene_variant	MODIFIER	.	.	.	EFF=upstream_gene_variant(MODIFIER||3328||870|pepN|protein_coding|CODING|ACT38618||1),upstream_gene_variant(MODIFIER||1584||396|aspC|protein_coding|CODING|ACT38614||1),upstream_gene_variant(MODIFIER||311||362|ompF|protein_coding|CODING|ACT38615||1),downstream_gene_variant(MODIFIER||291||466|asnS|protein_coding|CODING|ACT38616||1),downstream_gene_variant(MODIFIER||4399||615|ycbB|protein_coding|COD…	.	.	NA	NA	.	.	.	.	.	.	.	.	.	.	.	.	.	.	.	.	.	.	.	.
1006352	C	T	SNP	missense_variant	MODERATE	Gtg/Atg	p.Val366Met/c.1096G>A	pncB	EFF=missense_variant(MODERATE|MISSENSE|Gtg/Atg|p.Val366Met/c.1096G>A|400|pncB|protein_coding|CODING|ACT38617|1|1),upstream_gene_variant(MODIFIER||1361||870|pepN|protein_coding|CODING|ACT38618||1),upstream_gene_variant(MODIFIER||3551||396|aspC|protein_coding|CODING|ACT38614||1),upstream_gene_variant(MODIFIER||2278||362|ompF|protein_coding|CODING|ACT38615||1),upstream_gene_variant(MODIFIER||276||46…	240	238	COG1488	H	NO	1006245	1007447	-	G758A-G1096A	-454.92	-453.38	2.25e-12	8.78e-13	292.03	315.06	0.5093	0.2314	752-821	0.0805	-0.2308	758-827	0.036	0.929533	0.870442
1006690	C	T	SNP	missense_variant	MODERATE	gGc/gAc	p.Gly253Asp/c.758G>A	pncB	EFF=missense_variant(MODERATE|MISSENSE|gGc/gAc|p.Gly253Asp/c.758G>A|400|pncB|protein_coding|CODING|ACT38617|1|1),upstream_gene_variant(MODIFIER||1023||870|pepN|protein_coding|CODING|ACT38618||1),upstream_gene_variant(MODIFIER||3889||396|aspC|protein_coding|CODING|ACT38614||1),upstream_gene_variant(MODIFIER||2616||362|ompF|protein_coding|CODING|ACT38615||1),upstream_gene_variant(MODIFIER||614||466…	240	238	COG1488	H	NO	1006245	1007447	-	G758A-G1096A	-454.92	-453.38	2.25e-12	8.78e-13	292.03	315.06	0.5093	0.2314	752-821	0.0805	-0.2308	758-827	0.036	0.929533	0.870442
1013925	A	G	SNP	synonymous_variant	LOW	agT/agC	p.Ser37Ser/c.111T>C	ssuA	EFF=synonymous_variant(LOW|SILENT|agT/agC|p.Ser37Ser/c.111T>C|319|ssuA|protein_coding|CODING|ACT38622|1|1),upstream_gene_variant(MODIFIER||1034||179|ycbQ|protein_coding|CODING|ACT38624||1),upstream_gene_variant(MODIFIER||1656||233|ycbR|protein_coding|CODING|ACT38625||1),upstream_gene_variant(MODIFIER||2790||255|ssuB|protein_coding|CODING|ACT38619||1),upstream_gene_variant(MODIFIER||2382||866|ycbS…	0	31	COG0715	P	NO	1013076	1014035	-	T111C	-355.87	-354.61	3.8e-11	2.73e-11	189.99	268.41	0.5177	0.2192	48-148	0.0921	0.2223	60-112	0.1408	0.949407	0.874186
1019365	AG	A	DEL	frameshift_variant	HIGH	ggg/	p.Gly157fs/c.469delG	ycbT	EFF=frameshift_variant(HIGH||ggg/|p.Gly157fs/c.469delG|356|ycbT|protein_coding|CODING|ACT38627|1|1),upstream_gene_variant(MODIFIER||4763||191|ssuE|protein_coding|CODING|ACT38623||1),upstream_gene_variant(MODIFIER||614||180|ycbU|protein_coding|CODING|ACT38628||1),upstream_gene_variant(MODIFIER||1164||171|ycbV|protein_coding|CODING|ACT38629||1),upstream_gene_variant(MODIFIER||1672||236|ycbF|protein…	3	35	COG3539	NU	NO	.	.	.	.	.	.	.	.	.	.	.	.	.	.	.	.	.	.	.
1021245	GGGG	GGGGGGGG	INS	frameshift_variant	HIGH	ggg/gGGGGgg	p.Gly71_Glu72fs/c.212_213insGGGG	ycbF	EFF=frameshift_variant(HIGH||ggg/gGGGGgg|p.Gly71_Glu72fs/c.212_213insGGGG|236|ycbF|protein_coding|CODING|ACT38630|1|1),upstream_gene_variant(MODIFIER||610||336|pyrD|protein_coding|CODING|ACT38631||1),upstream_gene_variant(MODIFIER||1794||180|ycbW|protein_coding|CODING|ACT38632||1),upstream_gene_variant(MODIFIER||3686||702|ycbY|protein_coding|CODING|ACT38634||1),downstream_gene_variant(MODIFIER||4…	5	15	COG3121	NU	NO	.	.	.	.	.	.	.	.	.	.	.	.	.	.	.	.	.	.	.
1021946	A	G	SNP	missense_variant	MODERATE	Aca/Gca	p.Thr30Ala/c.88A>G	pyrD	EFF=missense_variant(MODERATE|MISSENSE|Aca/Gca|p.Thr30Ala/c.88A>G|336|pyrD|protein_coding|CODING|ACT38631|1|1),upstream_gene_variant(MODIFIER||1097||180|ycbW|protein_coding|CODING|ACT38632||1),upstream_gene_variant(MODIFIER||2989||702|ycbY|protein_coding|CODING|ACT38634||1),downstream_gene_variant(MODIFIER||1636||369|ycbX|protein_coding|CODING|ACT38633||1|WARNING_TRANSCRIPT_NO_START_CODON),downst…	107	171	COG0167	F	NO	1021859	1022869	+	A88G	-365.17	-367.45	1.32e-11	3.01e-11	151.59	234.71	0.5278	0.1957	80-133	0.1162	-0.2346	81-132	0.034	0.766088	0.637155
1029219	C	T	SNP	missense_variant	MODERATE	gCg/gTg	p.Ala43Val/c.128C>T	pqiA	EFF=missense_variant(MODERATE|MISSENSE|gCg/gTg|p.Ala43Val/c.128C>T|417|pqiA|protein_coding|CODING|ACT38636|1|1),upstream_gene_variant(MODIFIER||4528||369|ycbX|protein_coding|CODING|ACT38633||1|WARNING_TRANSCRIPT_NO_START_CODON),upstream_gene_variant(MODIFIER||1131||546|pqiB|protein_coding|CODING|ACT38637||1),upstream_gene_variant(MODIFIER||2783||182|ymbA|protein_coding|CODING|ACT38638||1|WARNING_…	114	58	COG2995	S	NO	1029092	1030345	+	C128T	-549.85	-547.75	1.11e-13	7.6e-14	328.7	333.31	0.5396	0.0262	114-163	0.6737	0.9641	116-165	0.8224	0.998242	0.990611
1030441	C	T	SNP	missense_variant	MODERATE	gCc/gTc	p.Ala31Val/c.92C>T	pqiB	EFF=missense_variant(MODERATE|MISSENSE|gCc/gTc|p.Ala31Val/c.92C>T|546|pqiB|protein_coding|CODING|ACT38637|1|1),upstream_gene_variant(MODIFIER||1561||182|ymbA|protein_coding|CODING|ACT38638||1|WARNING_TRANSCRIPT_NO_START_CODON),upstream_gene_variant(MODIFIER||2365||55|rmf|protein_coding|CODING|ACT38639||1),downstream_gene_variant(MODIFIER||3398||702|ycbY|protein_coding|CODING|ACT38634||1),downstre…	104	45	COG3008	R	NO	1030350	1031990	+	C92T	-657.66	-659.52	1.13e-18	5.28e-19	309.32	313.77	0.4932	0.1947	16-103	0.0855	0.1602	24-102	0.1014	0.989889	0.989162
1034605	T	C	SNP	synonymous_variant	LOW	gcA/gcG	p.Ala262Ala/c.786A>G	ycbZ	EFF=synonymous_variant(LOW|SILENT|gcA/gcG|p.Ala262Ala/c.786A>G|586|ycbZ|protein_coding|CODING|ACT38641|1|1),upstream_gene_variant(MODIFIER||971||150|ycbG|protein_coding|CODING|ACT38642||1),upstream_gene_variant(MODIFIER||3624||209|yccR|protein_coding|CODING|ACT38645||1),upstream_gene_variant(MODIFIER||1044||172|fabA|protein_coding|CODING|ACT38640||1),downstream_gene_variant(MODIFIER||4260||417|pq…	292	116	COG1067	O	YES	1033630	1035390	-	A328G-A786G	-720.49	-719.95	1.7e-20	1.55e-20	335.47	342.67	0.5402	0.0167	258-841	0.7577	0.9038	357-433	0.693	0.743235	0.617875
1035063	T	C	SNP	missense_variant	MODERATE	Aat/Gat	p.Asn110Asp/c.328A>G	ycbZ	EFF=missense_variant(MODERATE|MISSENSE|Aat/Gat|p.Asn110Asp/c.328A>G|586|ycbZ|protein_coding|CODING|ACT38641|1|1),upstream_gene_variant(MODIFIER||513||150|ycbG|protein_coding|CODING|ACT38642||1),upstream_gene_variant(MODIFIER||3166||209|yccR|protein_coding|CODING|ACT38645||1),upstream_gene_variant(MODIFIER||1502||172|fabA|protein_coding|CODING|ACT38640||1),downstream_gene_variant(MODIFIER||4718||4…	292	116	COG1067	O	YES	1033630	1035390	-	A328G-A786G	-720.49	-719.95	1.7e-20	1.55e-20	335.47	342.67	0.5402	0.0167	258-841	0.7577	0.9038	357-433	0.693	0.743235	0.617875
1039343	T	C	SNP	synonymous_variant	LOW	gaA/gaG	p.Glu544Glu/c.1632A>G	yccS	EFF=synonymous_variant(LOW|SILENT|gaA/gaG|p.Glu544Glu/c.1632A>G|717|yccS|protein_coding|CODING|ACT38646|1|1),upstream_gene_variant(MODIFIER||3953||586|ycbZ|protein_coding|CODING|ACT38641||1),upstream_gene_variant(MODIFIER||2219||684|helD|protein_coding|CODING|ACT38648||1),upstream_gene_variant(MODIFIER||2199||346|ompA|protein_coding|CODING|ACT38643||1),upstream_gene_variant(MODIFIER||1333||169|su…	76	28	COG1289	S	NO	1038821	1040974	-	A388G-G827A-A1632G	-895.37	-895.33	5.88e-23	4.63e-23	465.05	464.74	0.5277	0.0399	1554-1703	0.5615	0.8859	1554-1639	0.6617	0.919036
1040148	C	T	SNP	missense_variant	MODERATE	cGg/cAg	p.Arg276Gln/c.827G>A	yccS	EFF=missense_variant(MODERATE|MISSENSE|cGg/cAg|p.Arg276Gln/c.827G>A|717|yccS|protein_coding|CODING|ACT38646|1|1),upstream_gene_variant(MODIFIER||4758||586|ycbZ|protein_coding|CODING|ACT38641||1),upstream_gene_variant(MODIFIER||1414||684|helD|protein_coding|CODING|ACT38648||1),upstream_gene_variant(MODIFIER||3004||346|ompA|protein_coding|CODING|ACT38643||1),upstream_gene_variant(MODIFIER||2138||16…	76	28	COG1289	S	NO	1038821	1040974	-	A388G-G827A-A1632G	-895.37	-895.33	5.88e-23	4.63e-23	465.05	464.74	0.5277	0.0399	1554-1703	0.5615	0.8859	1554-1639	0.6617	0.919036
1040587	T	C	SNP	missense_variant	MODERATE	Aca/Gca	p.Thr130Ala/c.388A>G	yccS	EFF=missense_variant(MODERATE|MISSENSE|Aca/Gca|p.Thr130Ala/c.388A>G|717|yccS|protein_coding|CODING|ACT38646|1|1),upstream_gene_variant(MODIFIER||975||684|helD|protein_coding|CODING|ACT38648||1),upstream_gene_variant(MODIFIER||3443||346|ompA|protein_coding|CODING|ACT38643||1),upstream_gene_variant(MODIFIER||2577||169|sulA|protein_coding|CODING|ACT38644||1),upstream_gene_variant(MODIFIER||4450||137…	76	28	COG1289	S	NO	1038821	1040974	-	A388G-G827A-A1632G	-895.37	-895.33	5.88e-23	4.63e-23	465.05	464.74	0.5277	0.0399	1554-1703	0.5615	0.8859	1554-1639	0.6617	0.919036
1042168	C	T	SNP	missense_variant	MODERATE	Cgg/Tgg	p.Arg203Trp/c.607C>T	helD	EFF=missense_variant(MODERATE|MISSENSE|Cgg/Tgg|p.Arg203Trp/c.607C>T|684|helD|protein_coding|CODING|ACT38648|1|1),upstream_gene_variant(MODIFIER||4158||169|sulA|protein_coding|CODING|ACT38644||1),upstream_gene_variant(MODIFIER||2869||137|yccU|protein_coding|CODING|ACT38651||1),upstream_gene_variant(MODIFIER||1194||717|yccS|protein_coding|CODING|ACT38646||1),upstream_gene_variant(MODIFIER||729||148…	41	58	COG0210	L	NO	1041562	1043616	+	C607T	-898.05	-898.05	4.89e-20	3.87e-20	400.48	489.03	0.5661	0.0007	600-651	0.9797	0.9991	601-650	0.9815	0.885362	0.831741
1046159	G	A	SNP	missense_variant	MODERATE	cCg/cTg	p.Pro272Leu/c.815C>T	yccW	EFF=missense_variant(MODERATE|MISSENSE|cCg/cTg|p.Pro272Leu/c.815C>T|367|yccW|protein_coding|CODING|ACT38653|1|1),upstream_gene_variant(MODIFIER||4720||148|yccF|protein_coding|CODING|ACT38647||1),upstream_gene_variant(MODIFIER||996||92|yccX|protein_coding|CODING|ACT38654||1),upstream_gene_variant(MODIFIER||2053||152|mgsA|protein_coding|CODING|ACT38649||1),upstream_gene_variant(MODIFIER||3071||372|…	279	63	COG1092	R	NO	1045870	1046973	-	C815T	-454.25	-454.34	8.94e-13	1.05e-12	220.11	217.03	0.4913	0.0468	762-817	0.4526	0.7939	760-811	0.5004	0.959727	0.971347
1051096	C	T	SNP	missense_variant	MODERATE	gCa/gTa	p.Ala251Val/c.752C>T	hyaB	EFF=missense_variant(MODERATE|MISSENSE|gCa/gTa|p.Ala251Val/c.752C>T|597|hyaB|protein_coding|CODING|ACT38658|1|1),upstream_gene_variant(MODIFIER||4123||367|yccW|protein_coding|CODING|ACT38653||1),upstream_gene_variant(MODIFIER||1061||235|hyaC|protein_coding|CODING|ACT38659||1),upstream_gene_variant(MODIFIER||3337||109|yccK|protein_coding|CODING|ACT38655||1),upstream_gene_variant(MODIFIER||1765||19…	0	17	COG0374	C	NO	1050345	1052138	+	C752T	-762.74	-762.88	2e-20	1.21e-20	480.64	522.92	0.5387	0.0211	744-834	0.7127	0.8502	768-827	0.6063	0.986115	0.968088
1053680	A	G	SNP	missense_variant	MODERATE	cAg/cGg	p.Gln79Arg/c.236A>G	hyaE	EFF=missense_variant(MODERATE|MISSENSE|cAg/cGg|p.Gln79Arg/c.236A>G|132|hyaE|protein_coding|CODING|ACT38661|1|1),upstream_gene_variant(MODIFIER||4877|||serT|tRNA|NON_CODING|ECB_t00023||1),upstream_gene_variant(MODIFIER||160||285|hyaF|protein_coding|CODING|ACT38662||1),upstream_gene_variant(MODIFIER||1151||514|appC|protein_coding|CODING|ACT38663||1),upstream_gene_variant(MODIFIER||2707||378|appB|pr…	1	13	COG0526	OC	NO	1053445	1053843	+	A236G	-174.74	-175.89	0.000158525	0.000502648	46.98	110.1	0.5714	0.0817	216-274	0.337	0.5627	218-267	0.3009	0.957419	0.912908
1053964	A	G	SNP	missense_variant	MODERATE	cAa/cGa	p.Gln42Arg/c.125A>G	hyaF	EFF=missense_variant(MODERATE|MISSENSE|cAa/cGa|p.Gln42Arg/c.125A>G|285|hyaF|protein_coding|CODING|ACT38662|1|1),upstream_gene_variant(MODIFIER||867||514|appC|protein_coding|CODING|ACT38663||1),upstream_gene_variant(MODIFIER||2423||378|appB|protein_coding|CODING|ACT38664||1),upstream_gene_variant(MODIFIER||3744||432|appA|protein_coding|CODING|ACT38665||1),downstream_gene_variant(MODIFIER||3616||37…	0	22	NA	NA	NO	1053840	1054697	+	A125G-A276G-C779T	-350.7	-350.18	8.79e-07	1.92e-07	256.08	325.84	0.549	0.0132	2-147	0.7989	0.867	118-202	0.6326	0.980985	0.939031
1054115	A	G	SNP	synonymous_variant	LOW	gaA/gaG	p.Glu92Glu/c.276A>G	hyaF	EFF=synonymous_variant(LOW|SILENT|gaA/gaG|p.Glu92Glu/c.276A>G|285|hyaF|protein_coding|CODING|ACT38662|1|1),upstream_gene_variant(MODIFIER||716||514|appC|protein_coding|CODING|ACT38663||1),upstream_gene_variant(MODIFIER||2272||378|appB|protein_coding|CODING|ACT38664||1),upstream_gene_variant(MODIFIER||3593||432|appA|protein_coding|CODING|ACT38665||1),downstream_gene_variant(MODIFIER||3767||372|hya…	0	22	NA	NA	NO	1053840	1054697	+	A125G-A276G-C779T	-350.7	-350.18	8.79e-07	1.92e-07	256.08	325.84	0.549	0.0132	2-147	0.7989	0.867	118-202	0.6326	0.980985	0.939031
1054618	C	T	SNP	missense_variant	MODERATE	gCa/gTa	p.Ala260Val/c.779C>T	hyaF	EFF=missense_variant(MODERATE|MISSENSE|gCa/gTa|p.Ala260Val/c.779C>T|285|hyaF|protein_coding|CODING|ACT38662|1|1),upstream_gene_variant(MODIFIER||213||514|appC|protein_coding|CODING|ACT38663||1),upstream_gene_variant(MODIFIER||1769||378|appB|protein_coding|CODING|ACT38664||1),upstream_gene_variant(MODIFIER||3090||432|appA|protein_coding|CODING|ACT38665||1),downstream_gene_variant(MODIFIER||4270||3…	0	22	NA	NA	NO	1053840	1054697	+	A125G-A276G-C779T	-350.7	-350.18	8.79e-07	1.92e-07	256.08	325.84	0.549	0.0132	2-147	0.7989	0.867	118-202	0.6326	0.980985	0.939031
1056875	A	G	SNP	synonymous_variant	LOW	caA/caG	p.Gln163Gln/c.489A>G	appB	EFF=synonymous_variant(LOW|SILENT|caA/caG|p.Gln163Gln/c.489A>G|378|appB|protein_coding|CODING|ACT38664|1|1),upstream_gene_variant(MODIFIER||833||432|appA|protein_coding|CODING|ACT38665||1),downstream_gene_variant(MODIFIER||4737||597|hyaB|protein_coding|CODING|ACT38658||1),downstream_gene_variant(MODIFIER||4011||235|hyaC|protein_coding|CODING|ACT38659||1),downstream_gene_variant(MODIFIER||3427||19…	4	41	COG1294	C	NO	1056387	1057523	+	A489G	-514.97	-514.89	6.41e-12	1.72e-12	134.53	163.6	0.5536	0.5112	423-496	0.0075	-0.4448	440-496	0.0141	0.930966	0.966184
1060737	T	C	SNP	missense_variant	MODERATE	Atc/Gtc	p.Ile189Val/c.565A>G	yccC	EFF=missense_variant(MODERATE|MISSENSE|Atc/Gtc|p.Ile189Val/c.565A>G|726|yccC|protein_coding|CODING|ACT38666|1|1),downstream_gene_variant(MODIFIER||584||148|yccY|protein_coding|CODING|ACT38667||1),downstream_gene_variant(MODIFIER||4362||514|appC|protein_coding|CODING|ACT38663||1),downstream_gene_variant(MODIFIER||1018||379|yccZ|protein_coding|CODING|ACT38668||1),downstream_gene_variant(MODIFIER||3…	16	43	COG0192	H	YES	1059121	1061301	-	A565G	-906.9	-908.23	4.74e-20	2.74e-20	381.08	532.65	0.5037	0.1002	514-574	0.2869	0.3798	519-572	0.2108	0.99373	0.984382
1062285	G	GCCC	INS	inframe_insertion	MODERATE	ggg/gggGGG	p.Gly203_Leu204insGlyGly/c.609_610insGGG	yccZ	EFF=inframe_insertion(MODERATE||ggg/gggGGG|p.Gly203_Leu204insGlyGly/c.609_610insGGG|379|yccZ|protein_coding|CODING|ACT38668|1|1),upstream_gene_variant(MODIFIER||985||726|yccC|protein_coding|CODING|ACT38666||1),upstream_gene_variant(MODIFIER||519||148|yccY|protein_coding|CODING|ACT38667||1),downstream_gene_variant(MODIFIER||4763||378|appB|protein_coding|CODING|ACT38664||1),downstream_gene_variant(…	6	20	COG1596	M	NO	.	.	.	.	.	.	.	.	.	.	.	.	.	.	.	.	.	.	.
1066753	C	T	SNP	missense_variant	MODERATE	gGg/gAg	p.Gly28Glu/c.83G>A	ymcD	EFF=missense_variant(MODERATE|MISSENSE|gGg/gAg|p.Gly28Glu/c.83G>A|101|ymcD|protein_coding|CODING|ACT38672|1|1),upstream_gene_variant(MODIFIER||4986||148|yccY|protein_coding|CODING|ACT38667||1),upstream_gene_variant(MODIFIER||999||70|cspG|protein_coding|CODING|ACT38674||1),upstream_gene_variant(MODIFIER||3859||379|yccZ|protein_coding|CODING|ACT38668||1),upstream_gene_variant(MODIFIER||1385||76|sfa…	5	8	NA	NA	NO	1066530	1066835	-	G83A	-122.11	-121.87	0.000677839	0.000595218	70.58	40.89	0.576	0.0363	61-110	0.608	0.5542	60-110	0.3282	0.890297	0.865739
1069800	A	AGG	INS	frameshift_variant	HIGH	ctt/cCCtt	p.Leu890_Pro891fs/c.2668_2669insCC	torS	EFF=frameshift_variant(HIGH||ctt/cCCtt|p.Leu890_Pro891fs/c.2668_2669insCC|914|torS|protein_coding|CODING|ACT38678|1|1|WARNING_TRANSCRIPT_NO_START_CODON),upstream_gene_variant(MODIFIER||4765||698|ymcA|protein_coding|CODING|ACT38669||1),upstream_gene_variant(MODIFIER||4019||248|ymcB|protein_coding|CODING|ACT38670||1),upstream_gene_variant(MODIFIER||3378||214|ymcC|protein_coding|CODING|ACT38671||1|W…	3	20	COG0642	T	NO	.	.	.	.	.	.	.	.	.	.	.	.	.	.	.	.	.	.	.
1069906	AT	A	DEL	frameshift_variant	HIGH	aaa/	p.Lys854fs/c.2562delA	torS	EFF=frameshift_variant(HIGH||aaa/|p.Lys854fs/c.2562delA|914|torS|protein_coding|CODING|ACT38678|1|1|WARNING_TRANSCRIPT_NO_START_CODON),upstream_gene_variant(MODIFIER||4871||698|ymcA|protein_coding|CODING|ACT38669||1),upstream_gene_variant(MODIFIER||4125||248|ymcB|protein_coding|CODING|ACT38670||1),upstream_gene_variant(MODIFIER||3484||214|ymcC|protein_coding|CODING|ACT38671||1|WARNING_TRANSCRIPT_…	3	20	COG0642	T	NO	.	.	.	.	.	.	.	.	.	.	.	.	.	.	.	.	.	.	.
1070207	C	T	SNP	synonymous_variant	LOW	tcG/tcA	p.Ser754Ser/c.2262G>A	torS	EFF=synonymous_variant(LOW|SILENT|tcG/tcA|p.Ser754Ser/c.2262G>A|914|torS|protein_coding|CODING|ACT38678|1|1|WARNING_TRANSCRIPT_NO_START_CODON),upstream_gene_variant(MODIFIER||4425||248|ymcB|protein_coding|CODING|ACT38670||1),upstream_gene_variant(MODIFIER||3784||214|ymcC|protein_coding|CODING|ACT38671||1|WARNING_TRANSCRIPT_NO_START_CODON),upstream_gene_variant(MODIFIER||3372||101|ymcD|protein_cod…	3	20	COG0642	T	NO	.	.	.	.	.	.	.	.	.	.	.	.	.	.	.	.	.	.	.
1072664	G	A	SNP	synonymous_variant	LOW	ccG/ccA	p.Pro38Pro/c.114G>A	torT	EFF=synonymous_variant(LOW|SILENT|ccG/ccA|p.Pro38Pro/c.114G>A|342|torT|protein_coding|CODING|ACT38679|1|1),upstream_gene_variant(MODIFIER||1710||390|torC|protein_coding|CODING|ACT38681||1),upstream_gene_variant(MODIFIER||3012||357|yccM|protein_coding|CODING|ACT38677||1),upstream_gene_variant(MODIFIER||2882||848|torA|protein_coding|CODING|ACT38682||1),upstream_gene_variant(MODIFIER||196||914|torS|…	2	21	COG1879	G	NO	1072551	1073579	+	G114A-A848G	-447.73	-446.41	4.56e-12	8.29e-12	224.84	221.13	0.5345	0.03	65-334	0.6458	0.8438	95-209	0.5958	0.969793	0.937216
1073398	A	G	SNP	missense_variant	MODERATE	gAa/gGa	p.Glu283Gly/c.848A>G	torT	EFF=missense_variant(MODERATE|MISSENSE|gAa/gGa|p.Glu283Gly/c.848A>G|342|torT|protein_coding|CODING|ACT38679|1|1),upstream_gene_variant(MODIFIER||976||390|torC|protein_coding|CODING|ACT38681||1),upstream_gene_variant(MODIFIER||3746||357|yccM|protein_coding|CODING|ACT38677||1),upstream_gene_variant(MODIFIER||2148||848|torA|protein_coding|CODING|ACT38682||1),upstream_gene_variant(MODIFIER||930||914|…	2	21	COG1879	G	NO	1072551	1073579	+	G114A-A848G	-447.73	-446.41	4.56e-12	8.29e-12	224.84	221.13	0.5345	0.03	65-334	0.6458	0.8438	95-209	0.5958	0.969793	0.937216
1074495	T	C	SNP	missense_variant	MODERATE	gTc/gCc	p.Val41Ala/c.122T>C	torC	EFF=missense_variant(MODERATE|MISSENSE|gTc/gCc|p.Val41Ala/c.122T>C|390|torC|protein_coding|CODING|ACT38681|1|1),upstream_gene_variant(MODIFIER||4843||357|yccM|protein_coding|CODING|ACT38677||1),upstream_gene_variant(MODIFIER||1051||848|torA|protein_coding|CODING|ACT38682||1),upstream_gene_variant(MODIFIER||2027||914|torS|protein_coding|CODING|ACT38678||1|WARNING_TRANSCRIPT_NO_START_CODON),upstrea…	0	35	COG3005	C	NO	1074374	1075546	+	T122C-A1096G	-434.59	-435.27	4.37e-14	2.37e-14	380.74	414.29	0.5115	0.119	1076-1128	0.2295	0.5904	76-131	0.3272	0.970241	0.895679
1075469	A	G	SNP	missense_variant	MODERATE	Acc/Gcc	p.Thr366Ala/c.1096A>G	torC	EFF=missense_variant(MODERATE|MISSENSE|Acc/Gcc|p.Thr366Ala/c.1096A>G|390|torC|protein_coding|CODING|ACT38681|1|1),upstream_gene_variant(MODIFIER||77||848|torA|protein_coding|CODING|ACT38682||1),upstream_gene_variant(MODIFIER||3001||914|torS|protein_coding|CODING|ACT38678||1|WARNING_TRANSCRIPT_NO_START_CODON),upstream_gene_variant(MODIFIER||2620||199|torD|protein_coding|CODING|ACT38683||1),upstrea…	0	35	COG3005	C	NO	1074374	1075546	+	T122C-A1096G	-434.59	-435.27	4.37e-14	2.37e-14	380.74	414.29	0.5115	0.119	1076-1128	0.2295	0.5904	76-131	0.3272	0.970241	0.895679
1075593	A	G	SNP	synonymous_variant	LOW	gcA/gcG	p.Ala16Ala/c.48A>G	torA	EFF=synonymous_variant(LOW|SILENT|gcA/gcG|p.Ala16Ala/c.48A>G|848|torA|protein_coding|CODING|ACT38682|1|1),upstream_gene_variant(MODIFIER||3125||914|torS|protein_coding|CODING|ACT38678||1|WARNING_TRANSCRIPT_NO_START_CODON),upstream_gene_variant(MODIFIER||2496||199|torD|protein_coding|CODING|ACT38683||1),upstream_gene_variant(MODIFIER||1349||230|torR|protein_coding|CODING|ACT38680||1),upstream_gene…	1	17	COG0243	C	NO	1075546	1078092	+	A48G	-1145.78	-1147.14	4.69e-25	3.58e-25	425.36	464.41	0.5847	0.07	38-87	0.394	0.8627	36-85	0.6152	0.989455	0.99068
1084360	A	G	SNP	upstream_gene_variant	MODIFIER	.	.	.	EFF=upstream_gene_variant(MODIFIER||4||57|ymdF|protein_coding|CODING|ACT38690||1),upstream_gene_variant(MODIFIER||4295||306|cbpA|protein_coding|CODING|ACT38685||1),upstream_gene_variant(MODIFIER||986||75|yccJ|protein_coding|CODING|ACT38688||1),upstream_gene_variant(MODIFIER||369||198|wrbA|protein_coding|CODING|ACT38689||1),downstream_gene_variant(MODIFIER||435||442|ycdG|protein_coding|CODING|ACT3…	.	.	NA	NA	.	.	.	.	.	.	.	.	.	.	.	.	.	.	.	.	.	.	.	.
1087023	C	T	SNP	missense_variant	MODERATE	Ggc/Agc	p.Gly73Ser/c.217G>A	ycdI	EFF=missense_variant(MODERATE|MISSENSE|Ggc/Agc|p.Gly73Ser/c.217G>A|196|ycdI|protein_coding|CODING|ACT38693|1|1),upstream_gene_variant(MODIFIER||3649||75|yccJ|protein_coding|CODING|ACT38688||1),upstream_gene_variant(MODIFIER||3032||198|wrbA|protein_coding|CODING|ACT38689||1),upstream_gene_variant(MODIFIER||3503||212|ycdC|protein_coding|CODING|ACT38698||1),upstream_gene_variant(MODIFIER||900||442|y…	0	38	COG0778	C	NO	1086649	1087239	-	G217A	-233.77	-232.85	1.05e-07	1.73e-06	123.3	147.01	0.5761	0.0953	201-250	0.3022	0.5753	208-257	0.3281	0.881827	0.863875
1087463	C	T	SNP	missense_variant	MODERATE	cGc/cAc	p.Arg196His/c.587G>A	ycdJ	EFF=missense_variant(MODERATE|MISSENSE|cGc/cAc|p.Arg196His/c.587G>A|266|ycdJ|protein_coding|CODING|ACT38694|1|1),upstream_gene_variant(MODIFIER||4089||75|yccJ|protein_coding|CODING|ACT38688||1),upstream_gene_variant(MODIFIER||3472||198|wrbA|protein_coding|CODING|ACT38689||1),upstream_gene_variant(MODIFIER||3063||212|ycdC|protein_coding|CODING|ACT38698||1),upstream_gene_variant(MODIFIER||1340||442…	0	18	COG0596	R	NO	1087249	1088049	-	G587A	-372.96	-372.81	3.26e-08	4.8e-08	76.64	65.34	0.5761	0.0022	559-648	0.9512	0.9925	537-590	0.9316	0.958722	0.953136
1091708	A	G	SNP	synonymous_variant	LOW	cgT/cgC	p.Arg1153Arg/c.3459T>C	putA	EFF=synonymous_variant(LOW|SILENT|cgT/cgC|p.Arg1153Arg/c.3459T>C|1320|putA|protein_coding|CODING|ACT38699|1|1),upstream_gene_variant(MODIFIER||4469||196|ycdI|protein_coding|CODING|ACT38693||1),upstream_gene_variant(MODIFIER||3659||266|ycdJ|protein_coding|CODING|ACT38694||1),upstream_gene_variant(MODIFIER||3265||128|ycdK|protein_coding|CODING|ACT38695||1),upstream_gene_variant(MODIFIER||2561||230|…	16	29	COG0506	E	NO	1091204	1095166	-	T3459C	-1836.88	-1839.76	2.61e-37	2.59e-36	678.47	669.36	0.6259	0.2237	3421-3527	0.1069	-0.0038	3434-3501	0.0807	0.988387	0.978408
1097070	T	C	SNP	synonymous_variant	LOW	gcT/gcC	p.Ala494Ala/c.1482T>C	putP	EFF=synonymous_variant(LOW|SILENT|gcT/gcC|p.Ala494Ala/c.1482T>C|502|putP|protein_coding|CODING|ACT38700|1|1),upstream_gene_variant(MODIFIER||561||279|ycdN|protein_coding|CODING|ACT38701||1|WARNING_TRANSCRIPT_NO_START_CODON),upstream_gene_variant(MODIFIER||1458||375|ycdO|protein_coding|CODING|ACT38702||1),upstream_gene_variant(MODIFIER||2591||423|ycdB|protein_coding|CODING|ACT38703||1),upstream_ge…	36	59	COG0591	ER	NO	1095589	1097097	+	T1482C	-676.57	-677.19	1.23e-17	3.64e-18	359.97	400.68	0.5526	0.0132	1283-1495	0.7618	0.9722	1299-1370	0.8143	0.999977	0.999568
1097581	A	G	SNP	upstream_gene_variant	MODIFIER	.	.	.	EFF=upstream_gene_variant(MODIFIER||50||279|ycdN|protein_coding|CODING|ACT38701||1|WARNING_TRANSCRIPT_NO_START_CODON),upstream_gene_variant(MODIFIER||947||375|ycdO|protein_coding|CODING|ACT38702||1),upstream_gene_variant(MODIFIER||2080||423|ycdB|protein_coding|CODING|ACT38703||1),upstream_gene_variant(MODIFIER||2415||1320|putA|protein_coding|CODING|ACT38699||1),upstream_gene_variant(MODIFIER||369…	.	.	NA	NA	.	.	.	.	.	.	.	.	.	.	.	.	.	.	.	.	.	.	.	.
1104019	G	A	SNP	missense_variant	MODERATE	cCg/cTg	p.Pro38Leu/c.113C>T	ycdQ	EFF=missense_variant(MODERATE|MISSENSE|cCg/cTg|p.Pro38Leu/c.113C>T|441|ycdQ|protein_coding|CODING|ACT38706|1|1),upstream_gene_variant(MODIFIER||1215||137|ycdP|protein_coding|CODING|ACT38705||1),downstream_gene_variant(MODIFIER||105||672|ycdR|protein_coding|CODING|ACT38707||1),downstream_gene_variant(MODIFIER||4364||375|ycdO|protein_coding|CODING|ACT38702||1),downstream_gene_variant(MODIFIER||3087…	2	31	COG1215	M	NO	1102806	1104131	-	C113T	-476.95	-476.95	4.97e-15	1.07e-14	249.63	239.33	0.4409	0.2237	69-312	0.0635	-0.2037	147-228	0.0336	0.948009	0.931524
1107746	A	G	SNP	missense_variant	MODERATE	Tac/Cac	p.Tyr277His/c.829T>C	ycdS	EFF=missense_variant(MODERATE|MISSENSE|Tac/Cac|p.Tyr277His/c.829T>C|807|ycdS|protein_coding|CODING|ACT38708|1|1),upstream_gene_variant(MODIFIER||4942||137|ycdP|protein_coding|CODING|ACT38705||1),upstream_gene_variant(MODIFIER||3615||441|ycdQ|protein_coding|CODING|ACT38706||1),upstream_gene_variant(MODIFIER||1415||452|ycdT|protein_coding|CODING|ACT38709||1),upstream_gene_variant(MODIFIER||1604||67…	6	22	COG0457	R	NO	1106151	1108574	-	T829C	-863.48	-866.96	2.32e-23	9.68e-23	685.58	415.4	0.4688	0.0246	783-832	0.6283	0.9067	780-829	0.675	0.997516	0.984053
1118308	AT	A	DEL	upstream_gene_variant	MODIFIER	.	.	.	EFF=upstream_gene_variant(MODIFIER||211||151|csgB|protein_coding|CODING|ACT38720||1),upstream_gene_variant(MODIFIER||707||151|csgA|protein_coding|CODING|ACT38721||1),upstream_gene_variant(MODIFIER||1221||110|csgC|protein_coding|CODING|ACT38722||1),upstream_gene_variant(MODIFIER||1674||103|ymdA|protein_coding|CODING|ACT38723||1),upstream_gene_variant(MODIFIER||2080||177|ymdB|protein_coding|CODING|…	.	.	NA	NA	.	.	.	.	.	.	.	.	.	.	.	.	.	.	.	.	.	.	.	.
1122147	A	G	SNP	synonymous_variant	LOW	gcA/gcG	p.Ala408Ala/c.1224A>G	ymdC	EFF=synonymous_variant(LOW|SILENT|gcA/gcG|p.Ala408Ala/c.1224A>G|473|ymdC|protein_coding|CODING|ACT38725|1|1),upstream_gene_variant(MODIFIER||4382||216|csgD|protein_coding|CODING|ACT38719||1),upstream_gene_variant(MODIFIER||1757||511|mdoG|protein_coding|CODING|ACT38727||1),upstream_gene_variant(MODIFIER||3285||847|mdoH|protein_coding|CODING|ACT38728||1),downstream_gene_variant(MODIFIER||206||385|m…	7	44	COG1502	I	NO	1120924	1122345	+	A1224G	-572.09	-572.09	9.94e-16	8.81e-16	206.17	218.94	0.4737	0.0082	1162-1229	0.8306	0.976	1162-1229	0.8507	0.998466	0.994961
1138611	A	G	SNP	missense_variant	MODERATE	Tac/Cac	p.Tyr6His/c.16T>C	grxB	EFF=missense_variant(MODERATE|MISSENSE|Tac/Cac|p.Tyr6His/c.16T>C|215|grxB|protein_coding|CODING|ACT38742|1|1|WARNING_TRANSCRIPT_NO_START_CODON),upstream_gene_variant(MODIFIER||4996||188|yceJ|protein_coding|CODING|ACT38735||1),upstream_gene_variant(MODIFIER||4595||46|yceO|protein_coding|CODING|ACT38736||1),upstream_gene_variant(MODIFIER||1523||194|rimJ|protein_coding|CODING|ACT38744||1),upstream_g…	47	178	COG2999	O	NO	1137979	1138626	-	T16C	-225.92	-225.92	1.26e-08	4.51e-09	98.22	190.46	0.4676	0.0029	1954-01-01	0.9001	0.9925	1-111	0.9004	0.998755	0.985248
1142186	C	T	SNP	missense_variant	MODERATE	gCg/gTg	p.Ala270Val/c.809C>T	mviM	EFF=missense_variant(MODERATE|MISSENSE|gCg/gTg|p.Ala270Val/c.809C>T|307|mviM|protein_coding|CODING|ACT38746|1|1|WARNING_TRANSCRIPT_NO_START_CODON),upstream_gene_variant(MODIFIER||225||511|mviN|protein_coding|CODING|ACT38747||1),upstream_gene_variant(MODIFIER||4341||186|yceB|protein_coding|CODING|ACT38741||1),upstream_gene_variant(MODIFIER||3560||215|grxB|protein_coding|CODING|ACT38742||1|WARNING_…	22	38	COG0673	R	NO	1141378	1142301	+	C809T	-416.41	-417.98	2.4e-10	2.06e-10	225.25	221.91	0.5791	0.1124	791-865	0.259	0.5342	799-856	0.2934	0.992227	0.958283
1148087	A	G	SNP	synonymous_variant	LOW	gtA/gtG	p.Val314Val/c.942A>G	flgE	EFF=synonymous_variant(LOW|SILENT|gtA/gtG|p.Val314Val/c.942A>G|401|flgE|protein_coding|CODING|ACT38754|1|1),upstream_gene_variant(MODIFIER||284||251|flgF|protein_coding|CODING|ACT38755||1),upstream_gene_variant(MODIFIER||1211||260|flgG|protein_coding|CODING|ACT38756||1),upstream_gene_variant(MODIFIER||3685||138|flgN|protein_coding|CODING|ACT38748||1),upstream_gene_variant(MODIFIER||3387||97|flgM|…	8	90	COG1749	N	NO	1147146	1148351	+	A942G	-449.1	-451.7	8.14e-14	8.6e-14	263.72	221.36	0.5312	0.0948	920-969	0.3038	0.6124	891-960	0.356	0.979212	0.944511
1150841	T	C	SNP	upstream_gene_variant	MODIFIER	.	.	.	EFF=upstream_gene_variant(MODIFIER||2||365|flgI|protein_coding|CODING|ACT38758||1|WARNING_TRANSCRIPT_NO_START_CODON),upstream_gene_variant(MODIFIER||1099||313|flgJ|protein_coding|CODING|ACT38759||1),upstream_gene_variant(MODIFIER||2106||547|flgK|protein_coding|CODING|ACT38760||1),upstream_gene_variant(MODIFIER||3761||317|flgL|protein_coding|CODING|ACT38761||1),downstream_gene_variant(MODIFIER||48…	.	.	NA	NA	.	.	.	.	.	.	.	.	.	.	.	.	.	.	.	.	.	.	.	.
1151374	C	T	SNP	stop_gained	HIGH	Cag/Tag	p.Gln178*/c.532C>T	flgI	EFF=stop_gained(HIGH|NONSENSE|Cag/Tag|p.Gln178*/c.532C>T|365|flgI|protein_coding|CODING|ACT38758|1|1|WARNING_TRANSCRIPT_NO_START_CODON),upstream_gene_variant(MODIFIER||566||313|flgJ|protein_coding|CODING|ACT38759||1),upstream_gene_variant(MODIFIER||1573||547|flgK|protein_coding|CODING|ACT38760||1),upstream_gene_variant(MODIFIER||3228||317|flgL|protein_coding|CODING|ACT38761||1),downstream_gene_va…	3	39	COG1706	N	NO	1150843	1151940	+	C532T	-452.43	-453.12	1.39e-11	5.67e-12	286.69	260.73	0.5461	0.1146	448-611	0.2472	0.2064	469-598	0.1379	0.99465	0.995836
1155156	C	T	SNP	synonymous_variant	LOW	agC/agT	p.Ser185Ser/c.555C>T	flgL	EFF=synonymous_variant(LOW|SILENT|agC/agT|p.Ser185Ser/c.555C>T|317|flgL|protein_coding|CODING|ACT38761|1|1),upstream_gene_variant(MODIFIER||3915||106|ECB_01081|protein_coding|CODING|ACT38763||1|WARNING_TRANSCRIPT_NO_START_CODON),upstream_gene_variant(MODIFIER||4353||319|rluC|protein_coding|CODING|ACT38764||1),downstream_gene_variant(MODIFIER||595||1061|rne|protein_coding|CODING|ACT38762||1),downs…	5	59	COG1344	N	NO	1154602	1155555	+	C555T	-349.86	-347.72	6.17e-11	1.32e-11	298.46	284.22	0.5137	0.0037	500-633	0.9243	0.992	474-617	0.9291	0.919212	0.889261
1158096	G	A	SNP	missense_variant	MODERATE	Cgt/Tgt	p.Arg281Cys/c.841C>T	rne	EFF=missense_variant(MODERATE|MISSENSE|Cgt/Tgt|p.Arg281Cys/c.841C>T|1061|rne|protein_coding|CODING|ACT38762|1|1),upstream_gene_variant(MODIFIER||975||106|ECB_01081|protein_coding|CODING|ACT38763||1|WARNING_TRANSCRIPT_NO_START_CODON),upstream_gene_variant(MODIFIER||1413||319|rluC|protein_coding|CODING|ACT38764||1),upstream_gene_variant(MODIFIER||3267||173|yceD|protein_coding|CODING|ACT38766||1),up…	4	42	COG1530	J	YES	1155751	1158936	-	C841T	-1353.61	-1351.51	9.94e-28	6.85e-28	495.29	500.56	0.5561	0.0171	809-858	0.7527	0.9715	810-860	0.8491	0.999274	0.997793
1159940	C	T	SNP	synonymous_variant	LOW	gaC/gaT	p.Asp144Asp/c.432C>T	rluC	EFF=synonymous_variant(LOW|SILENT|gaC/gaT|p.Asp144Asp/c.432C>T|319|rluC|protein_coding|CODING|ACT38764|1|1),upstream_gene_variant(MODIFIER||1423||173|yceD|protein_coding|CODING|ACT38766||1),upstream_gene_variant(MODIFIER||1996||57|rpmF|protein_coding|CODING|ACT38767||1),upstream_gene_variant(MODIFIER||2250||356|plsX|protein_coding|CODING|ACT38768||1),upstream_gene_variant(MODIFIER||3388||317|fabH…	260	62	COG0564	J	NO	1159509	1160468	+	C432T	-402.72	-400.91	8.91e-12	1.08e-11	230.24	192.32	0.5337	0.0005	429-548	0.9865	0.9989	425-553	0.9788	0.968145	0.905779
1162209	C	T	SNP	missense_variant	MODERATE	gCg/gTg	p.Ala7Val/c.20C>T	plsX	EFF=missense_variant(MODERATE|MISSENSE|gCg/gTg|p.Ala7Val/c.20C>T|356|plsX|protein_coding|CODING|ACT38768|1|1),upstream_gene_variant(MODIFIER||1119||317|fabH|protein_coding|CODING|ACT38769||1),upstream_gene_variant(MODIFIER||3273||1061|rne|protein_coding|CODING|ACT38762||1),upstream_gene_variant(MODIFIER||2088||309|fabD|protein_coding|CODING|ACT38770||1),upstream_gene_variant(MODIFIER||3030||244|f…	321	115	COG0416	I	NO	1162190	1163260	+	C20T-G397A	-468.24	-467.93	1.69e-11	1.16e-11	222.19	202.96	0.5327	0.0471	371-420	0.4519	0.8289	396-452	0.5154	0.987191	0.995146
1162586	G	A	SNP	missense_variant	MODERATE	Gta/Ata	p.Val133Ile/c.397G>A	plsX	EFF=missense_variant(MODERATE|MISSENSE|Gta/Ata|p.Val133Ile/c.397G>A|356|plsX|protein_coding|CODING|ACT38768|1|1),upstream_gene_variant(MODIFIER||742||317|fabH|protein_coding|CODING|ACT38769||1),upstream_gene_variant(MODIFIER||3650||1061|rne|protein_coding|CODING|ACT38762||1),upstream_gene_variant(MODIFIER||1711||309|fabD|protein_coding|CODING|ACT38770||1),upstream_gene_variant(MODIFIER||2653||244…	321	115	COG0416	I	NO	1162190	1163260	+	C20T-G397A	-468.24	-467.93	1.69e-11	1.16e-11	222.19	202.96	0.5327	0.0471	371-420	0.4519	0.8289	396-452	0.5154	0.987191	0.995146
1165325	C	T	SNP	synonymous_variant	LOW	ggC/ggT	p.Gly29Gly/c.87C>T	fabG	EFF=synonymous_variant(LOW|SILENT|ggC/ggT|p.Gly29Gly/c.87C>T|244|fabG|protein_coding|CODING|ACT38771|1|1),upstream_gene_variant(MODIFIER||4161||194|yceF|protein_coding|CODING|ACT38765||1),upstream_gene_variant(MODIFIER||859||78|acpP|protein_coding|CODING|ACT38772||1),upstream_gene_variant(MODIFIER||1183||413|fabF|protein_coding|CODING|ACT38773||1|WARNING_TRANSCRIPT_NO_START_CODON),upstream_gene_v…	4364	932	COG1028	IQR	YES	1165239	1165973	+	C87T-A162G	-318.28	-319.18	3.44e-08	4.66e-08	103.27	86	0.4724	0.1411	75-125	0.1609	0.3225	82-131	0.1684	0.968002	0.971855
1165400	A	G	SNP	synonymous_variant	LOW	aaA/aaG	p.Lys54Lys/c.162A>G	fabG	EFF=synonymous_variant(LOW|SILENT|aaA/aaG|p.Lys54Lys/c.162A>G|244|fabG|protein_coding|CODING|ACT38771|1|1),upstream_gene_variant(MODIFIER||4236||194|yceF|protein_coding|CODING|ACT38765||1),upstream_gene_variant(MODIFIER||784||78|acpP|protein_coding|CODING|ACT38772||1),upstream_gene_variant(MODIFIER||1108||413|fabF|protein_coding|CODING|ACT38773||1|WARNING_TRANSCRIPT_NO_START_CODON),upstream_gene_…	4364	932	COG1028	IQR	YES	1165239	1165973	+	C87T-A162G	-318.28	-319.18	3.44e-08	4.66e-08	103.27	86	0.4724	0.1411	75-125	0.1609	0.3225	82-131	0.1684	0.968002	0.971855
1166055	T	TG	INS	upstream_gene_variant	MODIFIER	.	.	.	EFF=upstream_gene_variant(MODIFIER||4892||194|yceF|protein_coding|CODING|ACT38765||1),upstream_gene_variant(MODIFIER||128||78|acpP|protein_coding|CODING|ACT38772||1),upstream_gene_variant(MODIFIER||452||413|fabF|protein_coding|CODING|ACT38773||1|WARNING_TRANSCRIPT_NO_START_CODON),upstream_gene_variant(MODIFIER||1813||269|pabC|protein_coding|CODING|ACT38774||1),upstream_gene_variant(MODIFIER||2625…	.	.	NA	NA	.	.	.	.	.	.	.	.	.	.	.	.	.	.	.	.	.	.	.	.
1170093	A	G	SNP	missense_variant	MODERATE	gAc/gGc	p.Asp134Gly/c.401A>G	tmk	EFF=missense_variant(MODERATE|MISSENSE|gAc/gGc|p.Asp134Gly/c.401A>G|213|tmk|protein_coding|CODING|ACT38776|1|1),upstream_gene_variant(MODIFIER||238||334|holB|protein_coding|CODING|ACT38777||1),upstream_gene_variant(MODIFIER||1253||265|ycfH|protein_coding|CODING|ACT38778||1),upstream_gene_variant(MODIFIER||2345||477|ptsG|protein_coding|CODING|ACT38779||1),downstream_gene_variant(MODIFIER||4867||30…	118	60	COG0125	F	YES	1169693	1170334	+	A401G	-261.95	-266.88	1.87e-06	3.5e-06	113.99	77.32	0.5436	0.0753	391-440	0.3743	0.7676	384-433	0.5012	0.982505	0.933366
1174380	A	G	SNP	missense_variant	MODERATE	Tat/Cat	p.Tyr581His/c.1741T>C	fhuE	EFF=missense_variant(MODERATE|MISSENSE|Tat/Cat|p.Tyr581His/c.1741T>C|729|fhuE|protein_coding|CODING|ACT38780|1|1),upstream_gene_variant(MODIFIER||2074||119|ycfF|protein_coding|CODING|ACT38781||1|WARNING_TRANSCRIPT_NO_START_CODON),upstream_gene_variant(MODIFIER||2436||125|ycfL|protein_coding|CODING|ACT38782||1),upstream_gene_variant(MODIFIER||2827||213|ycfM|protein_coding|CODING|ACT38783||1),upstr…	8	29	COG4773	P	NO	1173931	1176120	-	T1741C	-793.82	-793.82	6.37e-25	6.54e-25	587.43	587.91	0.5087	0.0002	1703-1758	0.9935	0.9994	1703-1806	0.9856	0.992236	0.976093
1177927	T	C	SNP	synonymous_variant	LOW	agT/agC	p.Ser33Ser/c.99T>C	ycfN	EFF=synonymous_variant(LOW|SILENT|agT/agC|p.Ser33Ser/c.99T>C|274|ycfN|protein_coding|CODING|ACT38784|1|1|WARNING_TRANSCRIPT_NO_START_CODON),upstream_gene_variant(MODIFIER||737||341|nagZ|protein_coding|CODING|ACT38785||1|WARNING_TRANSCRIPT_NO_START_CODON),upstream_gene_variant(MODIFIER||1785||180|ycfP|protein_coding|CODING|ACT38786||1),upstream_gene_variant(MODIFIER||2735||434|ndh|protein_coding|C…	74	49	COG0510	M	NO	1177829	1178653	+	T99C	-333.65	-335.67	6.03e-09	1.92e-08	292.17	259.76	0.5385	0.1195	98-222	0.2482	0.2953	160-209	0.1781	0.926174	0.965404
1188542	A	G	SNP	synonymous_variant	LOW	cgT/cgC	p.Arg6Arg/c.18T>C	mfd	EFF=synonymous_variant(LOW|SILENT|cgT/cgC|p.Arg6Arg/c.18T>C|1148|mfd|protein_coding|CODING|ACT38792|1|1),upstream_gene_variant(MODIFIER||3573||320|ycfS|protein_coding|CODING|ACT38791||1|WARNING_TRANSCRIPT_NO_START_CODON),upstream_gene_variant(MODIFIER||1480||399|ycfU|protein_coding|CODING|ACT38794||1),upstream_gene_variant(MODIFIER||2672||233|ycfV|protein_coding|CODING|ACT38795||1),upstream_gene_…	58	60	COG1197	LK	NO	1185113	1188559	-	T18C	-1491.78	-1493.35	1.36e-34	1.08e-33	765.43	724.54	0.5413	0.0509	168-217	0.4181	0.7541	144-212	0.4121	0.996917	0.997618
1205588	A	G	SNP	missense_variant	MODERATE	gTa/gCa	p.Val77Ala/c.230T>C	phoP	EFF=missense_variant(MODERATE|MISSENSE|gTa/gCa|p.Val77Ala/c.230T>C|223|phoP|protein_coding|CODING|ACT38809|1|1),upstream_gene_variant(MODIFIER||4624||378|potA|protein_coding|CODING|ACT38805||1),upstream_gene_variant(MODIFIER||1978||373|ycfD|protein_coding|CODING|ACT38807||1),upstream_gene_variant(MODIFIER||442||486|phoQ|protein_coding|CODING|ACT38808||1),upstream_gene_variant(MODIFIER||4904||416|…	119	165	COG0745	TK	NO	1205146	1205817	-	T230C	-224.56	-226.78	1.4e-08	6.22e-08	223.01	206.69	0.4788	0.0773	30-425	0.3005	0.3935	160-349	0.1861	0.992314	0.981048
1208610	A	G	SNP	missense_variant	MODERATE	gTg/gCg	p.Val178Ala/c.533T>C	trmU	EFF=missense_variant(MODERATE|MISSENSE|gTg/gCg|p.Val178Ala/c.533T>C|368|trmU|protein_coding|CODING|ACT38812|1|1),upstream_gene_variant(MODIFIER||5000||373|ycfD|protein_coding|CODING|ACT38807||1),upstream_gene_variant(MODIFIER||3464||486|phoQ|protein_coding|CODING|ACT38808||1),upstream_gene_variant(MODIFIER||1882||416|icdA|protein_coding|CODING|ACT38815||1),upstream_gene_variant(MODIFIER||2793||22…	383	142	COG0482	J	NO	1208036	1209142	-	T533C	-446.08	-447.41	1.33e-12	5.43e-13	265.18	182.39	0.5337	0.0107	393-562	0.8253	0.9476	470-539	0.7838	0.978502	0.960984
1217055	G	A	SNP	synonymous_variant	LOW	gtG/gtA	p.Val49Val/c.147G>A	ymgC	EFF=synonymous_variant(LOW|SILENT|gtG/gtA|p.Val49Val/c.147G>A|82|ymgC|protein_coding|CODING|ACT38823|1|1),upstream_gene_variant(MODIFIER||4887||107|ycgW|protein_coding|CODING|ACT38816||1),upstream_gene_variant(MODIFIER||434||507|ycgG|protein_coding|CODING|ACT38824||1),upstream_gene_variant(MODIFIER||3787||134|ycgX|protein_coding|CODING|ACT38817||1),upstream_gene_variant(MODIFIER||2089||72|ymgF|pr…	7	29	NA	NA	NO	1216909	1217157	+	G147A	-69.52	-69.83	0.0014549	0.0018081	53.68	41.57	0.3574	0.0022	106-160	0.9458	0.9924	120-239	0.9352	0.994129	0.992506
1218578	C	T	SNP	missense_variant	MODERATE	Cgc/Tgc	p.Arg364Cys/c.1090C>T	ycgG	EFF=missense_variant(MODERATE|MISSENSE|Cgc/Tgc|p.Arg364Cys/c.1090C>T|507|ycgG|protein_coding|CODING|ACT38824|1|1),upstream_gene_variant(MODIFIER||566||72|ymgF|protein_coding|CODING|ACT38825||1),upstream_gene_variant(MODIFIER||4358||243|ycgE|protein_coding|CODING|ACT38818||1|WARNING_TRANSCRIPT_NO_START_CODON),upstream_gene_variant(MODIFIER||2942||403|ycgF|protein_coding|CODING|ACT38819||1),downstr…	1	24	COG2200	T	NO	1217489	1219012	+	C1090T	-516.05	-519.67	1.06e-17	1.86e-17	272.38	236.55	0.4339	0.1067	1059-1108	0.2078	0.7194	1059-1108	0.4164	0.985129	0.890282
1225081	A	C	SNP	missense_variant	MODERATE	Tcc/Gcc	p.Ser148Ala/c.442T>G	minD	EFF=missense_variant(MODERATE|MISSENSE|Tcc/Gcc|p.Ser148Ala/c.442T>G|270|minD|protein_coding|CODING|ACT38830|1|1),upstream_gene_variant(MODIFIER||1680||122|ycgJ|protein_coding|CODING|ACT38832||1),upstream_gene_variant(MODIFIER||2286||109|ymgD|protein_coding|CODING|ACT38826||1),upstream_gene_variant(MODIFIER||2761||108|ycgL|protein_coding|CODING|ACT38834||1),upstream_gene_variant(MODIFIER||2001||91…	738	637	COG2894	D	NO	1224710	1225522	-	T442G	-325.89	-328.3	1.26e-08	4.68e-09	135.75	182.99	0.5062	0.1832	432-481	0.1261	0.3928	431-484	0.2173	0.912198	0.871537
1232035	T	C	SNP	missense_variant	MODERATE	Tgt/Cgt	p.Cys234Arg/c.700T>C	umuC	EFF=missense_variant(MODERATE|MISSENSE|Tgt/Cgt|p.Cys234Arg/c.700T>C|422|umuC|protein_coding|CODING|ACT38838|1|1),upstream_gene_variant(MODIFIER||4402||133|ycgK|protein_coding|CODING|ACT38833||1),upstream_gene_variant(MODIFIER||3053||239|fadR|protein_coding|CODING|ACT38841||1),downstream_gene_variant(MODIFIER||4906||122|ycgJ|protein_coding|CODING|ACT38832||1),downstream_gene_variant(MODIFIER||615|…	3	41	COG0389	L	NO	1231336	1232604	+	T700C	-515.89	-516.46	2.21e-14	4.71e-14	274.84	297.79	0.5062	0.0282	674-820	0.6499	0.9134	674-757	0.7108	0.988253	0.953978
1239843	A	G	SNP	missense_variant	MODERATE	tAc/tGc	p.Tyr272Cys/c.815A>G	dadX	EFF=missense_variant(MODERATE|MISSENSE|tAc/tGc|p.Tyr272Cys/c.815A>G|356|dadX|protein_coding|CODING|ACT38844|1|1),upstream_gene_variant(MODIFIER||4976||513|nhaB|protein_coding|CODING|ACT38840||1),upstream_gene_variant(MODIFIER||2452||510|ycgB|protein_coding|CODING|ACT38842||1),upstream_gene_variant(MODIFIER||3487||203|mltE|protein_coding|CODING|ACT38847||1|WARNING_TRANSCRIPT_NO_START_CODON),downst…	56	84	COG0787	M	NO	1239029	1240099	+	A815G	-529.42	-529.51	7.75e-12	4.2e-12	113.84	128.85	0.5985	0.0776	762-822	0.3652	0.84	763-821	0.5918	0.990234	0.986304
1245657	A	G	SNP	synonymous_variant	LOW	acA/acG	p.Thr116Thr/c.348A>G	ycgY	EFF=synonymous_variant(LOW|SILENT|acA/acG|p.Thr116Thr/c.348A>G|146|ycgY|protein_coding|CODING|ACT38850|1|1|WARNING_TRANSCRIPT_NO_START_CODON),upstream_gene_variant(MODIFIER||3436||578|ycgO|protein_coding|CODING|ACT38845||1),upstream_gene_variant(MODIFIER||2427||304|ldcA|protein_coding|CODING|ACT38846||1),upstream_gene_variant(MODIFIER||980||244|ycgR|protein_coding|CODING|ACT38848||1|WARNING_TRANS…	1	23	NA	NA	NO	1245310	1245750	+	A348G	-127.07	-126.55	1.1e-05	9.38e-06	134.72	138.49	0.415	0.0008	309-358	0.9757	0.9973	316-369	0.9624	0.999566	0.997551
1245750	G	GA	INS	upstream_gene_variant	MODIFIER	.	.	.	EFF=upstream_gene_variant(MODIFIER||3530||578|ycgO|protein_coding|CODING|ACT38845||1),upstream_gene_variant(MODIFIER||2521||304|ldcA|protein_coding|CODING|ACT38846||1),upstream_gene_variant(MODIFIER||1074||244|ycgR|protein_coding|CODING|ACT38848||1|WARNING_TRANSCRIPT_NO_START_CODON),downstream_gene_variant(MODIFIER||78||565|treA|protein_coding|CODING|ACT38851||1),downstream_gene_variant(MODIFIER|…	.	.	NA	NA	.	.	.	.	.	.	.	.	.	.	.	.	.	.	.	.	.	.	.	.
1247830	C	T	SNP	upstream_gene_variant	MODIFIER	.	.	.	EFF=upstream_gene_variant(MODIFIER||4600||304|ldcA|protein_coding|CODING|ACT38846||1),upstream_gene_variant(MODIFIER||3153||244|ycgR|protein_coding|CODING|ACT38848||1|WARNING_TRANSCRIPT_NO_START_CODON),upstream_gene_variant(MODIFIER||3386||639|dhaR|protein_coding|CODING|ACT38855||1),upstream_gene_variant(MODIFIER||304||565|treA|protein_coding|CODING|ACT38851||1),downstream_gene_variant(MODIFIER||…	.	.	NA	NA	.	.	.	.	.	.	.	.	.	.	.	.	.	.	.	.	.	.	.	.
1251185	G	A	SNP	upstream_gene_variant	MODIFIER	.	.	.	EFF=upstream_gene_variant(MODIFIER||31||639|dhaR|protein_coding|CODING|ACT38855||1),upstream_gene_variant(MODIFIER||3659||565|treA|protein_coding|CODING|ACT38851||1),upstream_gene_variant(MODIFIER||1921||472|dhaM|protein_coding|CODING|ACT38852||1),upstream_gene_variant(MODIFIER||1278||210|dhaL|protein_coding|CODING|ACT38853||1),upstream_gene_variant(MODIFIER||197||356|dhaK|protein_coding|CODING|A…	.	.	NA	NA	.	.	.	.	.	.	.	.	.	.	.	.	.	.	.	.	.	.	.	.
1252289	C	T	SNP	synonymous_variant	LOW	ggC/ggT	p.Gly358Gly/c.1074C>T	dhaR	EFF=synonymous_variant(LOW|SILENT|ggC/ggT|p.Gly358Gly/c.1074C>T|639|dhaR|protein_coding|CODING|ACT38855|1|1),upstream_gene_variant(MODIFIER||4763||565|treA|protein_coding|CODING|ACT38851||1),upstream_gene_variant(MODIFIER||3025||472|dhaM|protein_coding|CODING|ACT38852||1),upstream_gene_variant(MODIFIER||2382||210|dhaL|protein_coding|CODING|ACT38853||1),upstream_gene_variant(MODIFIER||1301||356|dh…	16	24	COG3284	QK	NO	1251216	1253135	+	C1074T	-777.01	-774.56	3.71e-21	2.9e-21	407.63	407.9	0.5187	0.0519	1039-1088	0.4873	0.8617	1037-1090	0.6234	0.994692	0.969847
1262123	G	A	SNP	upstream_gene_variant	MODIFIER	.	.	.	EFF=upstream_gene_variant(MODIFIER||4161||363|ychF|protein_coding|CODING|ACT38857||1),upstream_gene_variant(MODIFIER||3460||194|pth|protein_coding|CODING|ACT38858||1|WARNING_TRANSCRIPT_NO_START_CODON),upstream_gene_variant(MODIFIER||1741||418|hemA|protein_coding|CODING|ACT38864||1),upstream_gene_variant(MODIFIER||3039||360|prfA|protein_coding|CODING|ACT38865||1),upstream_gene_variant(MODIFIER||11…	.	.	NA	NA	.	.	.	.	.	.	.	.	.	.	.	.	.	.	.	.	.	.	.	.
1275602	G	A	SNP	synonymous_variant	LOW	ggC/ggT	p.Gly126Gly/c.378C>T	narL	EFF=synonymous_variant(LOW|SILENT|ggC/ggT|p.Gly126Gly/c.378C>T|216|narL|protein_coding|CODING|ACT38878|1|1),upstream_gene_variant(MODIFIER||3604||366|chaA|protein_coding|CODING|ACT38873||1),upstream_gene_variant(MODIFIER||2505||463|narK|protein_coding|CODING|ACT38880||1),upstream_gene_variant(MODIFIER||1854||117|ychN|protein_coding|CODING|ACT38876||1),upstream_gene_variant(MODIFIER||4412||1247|na…	158	166	COG2197	TK	NO	1275329	1275979	-	T263C-C378T	-251.64	-249.31	2.07e-07	2.11e-07	120.77	120.99	0.5194	0.1183	347-396	0.238	0.0681	350-402	0.095	0.943138	0.958717
1275717	A	G	SNP	missense_variant	MODERATE	gTc/gCc	p.Val88Ala/c.263T>C	narL	EFF=missense_variant(MODERATE|MISSENSE|gTc/gCc|p.Val88Ala/c.263T>C|216|narL|protein_coding|CODING|ACT38878|1|1),upstream_gene_variant(MODIFIER||3719||366|chaA|protein_coding|CODING|ACT38873||1),upstream_gene_variant(MODIFIER||2390||463|narK|protein_coding|CODING|ACT38880||1),upstream_gene_variant(MODIFIER||1969||117|ychN|protein_coding|CODING|ACT38876||1),upstream_gene_variant(MODIFIER||4297||124…	158	166	COG2197	TK	NO	1275329	1275979	-	T263C-C378T	-251.64	-249.31	2.07e-07	2.11e-07	120.77	120.99	0.5194	0.1183	347-396	0.238	0.0681	350-402	0.095	0.943138	0.958717
1277333	C	T	SNP	missense_variant	MODERATE	Gaa/Aaa	p.Glu146Lys/c.436G>A	narX	EFF=missense_variant(MODERATE|MISSENSE|Gaa/Aaa|p.Glu146Lys/c.436G>A|598|narX|protein_coding|CODING|ACT38879|1|1),upstream_gene_variant(MODIFIER||774||463|narK|protein_coding|CODING|ACT38880||1),upstream_gene_variant(MODIFIER||3585||117|ychN|protein_coding|CODING|ACT38876||1),upstream_gene_variant(MODIFIER||2681||1247|narG|protein_coding|CODING|ACT38881||1),upstream_gene_variant(MODIFIER||1354||21…	36	40	COG3850	T	NO	1275972	1277768	-	G436A	-750.51	-750.13	1.19e-18	2.62e-18	546.28	550.29	0.5362	0.2076	373-566	0.1003	-0.1413	398-461	0.0496	0.999622	0.994699
1278188	C	T	SNP	stop_gained	HIGH	Caa/Taa	p.Gln28*/c.82C>T	narK	EFF=stop_gained(HIGH|NONSENSE|Caa/Taa|p.Gln28*/c.82C>T|463|narK|protein_coding|CODING|ACT38880|1|1),upstream_gene_variant(MODIFIER||4440||117|ychN|protein_coding|CODING|ACT38876||1),upstream_gene_variant(MODIFIER||1826||1247|narG|protein_coding|CODING|ACT38881||1),upstream_gene_variant(MODIFIER||2209||216|narL|protein_coding|CODING|ACT38878||1),upstream_gene_variant(MODIFIER||420||598|narX|protei…	0	22	COG2223	P	NO	1278107	1279498	+	C82T	-605.98	-608.23	5.71e-14	2.89e-14	389.66	360.25	0.5142	0.0787	40-143	0.388	0.7726	59-143	0.5246	0.930422	0.928666
1280949	C	T	SNP	synonymous_variant	LOW	caC/caT	p.His312His/c.936C>T	narG	EFF=synonymous_variant(LOW|SILENT|caC/caT|p.His312His/c.936C>T|1247|narG|protein_coding|CODING|ACT38881|1|1),upstream_gene_variant(MODIFIER||4970||216|narL|protein_coding|CODING|ACT38878||1),upstream_gene_variant(MODIFIER||3181||598|narX|protein_coding|CODING|ACT38879||1),upstream_gene_variant(MODIFIER||2805||512|narH|protein_coding|CODING|ACT38882||1),upstream_gene_variant(MODIFIER||4340||236|na…	0	14	COG5013	C	NO	1280014	1283757	+	C936T-A2311G	-1622.9	-1621.27	1.04e-38	8.7e-39	580.16	601.04	0.5535	0.0306	2288-2337	0.6304	0.7248	2291-2340	0.4557	0.982257
1282324	A	G	SNP	missense_variant	MODERATE	Acg/Gcg	p.Thr771Ala/c.2311A>G	narG	EFF=missense_variant(MODERATE|MISSENSE|Acg/Gcg|p.Thr771Ala/c.2311A>G|1247|narG|protein_coding|CODING|ACT38881|1|1),upstream_gene_variant(MODIFIER||4556||598|narX|protein_coding|CODING|ACT38879||1),upstream_gene_variant(MODIFIER||1430||512|narH|protein_coding|CODING|ACT38882||1),upstream_gene_variant(MODIFIER||2965||236|narJ|protein_coding|CODING|ACT38883||1),upstream_gene_variant(MODIFIER||3675||…	0	14	COG5013	C	NO	1280014	1283757	+	C936T-A2311G	-1622.9	-1621.27	1.04e-38	8.7e-39	580.16	601.04	0.5535	0.0306	2288-2337	0.6304	0.7248	2291-2340	0.4557	0.982257
1284959	A	G	SNP	synonymous_variant	LOW	gtA/gtG	p.Val402Val/c.1206A>G	narH	EFF=synonymous_variant(LOW|SILENT|gtA/gtG|p.Val402Val/c.1206A>G|512|narH|protein_coding|CODING|ACT38882|1|1),upstream_gene_variant(MODIFIER||330||236|narJ|protein_coding|CODING|ACT38883||1),upstream_gene_variant(MODIFIER||1040||225|narI|protein_coding|CODING|ACT38884||1),upstream_gene_variant(MODIFIER||4041||314|ychK|protein_coding|CODING|ACT38887||1|WARNING_TRANSCRIPT_NO_START_CODON),downstream_…	1	12	COG1140	C	NO	1283754	1285292	+	A1206G	-647.08	-648.85	5.55e-16	1.47e-15	228.21	329.06	0.5611	0.1	1131-1236	0.2876	0.4723	1149-1220	0.2608	0.971517	0.944388
1296662	GT	G	DEL	frameshift_variant	HIGH	aaa/	p.Lys84fs/c.252delA	adhE	EFF=frameshift_variant(HIGH||aaa/|p.Lys84fs/c.252delA|891|adhE|protein_coding|CODING|ACT38892|1|1),upstream_gene_variant(MODIFIER||728||215|ychE|protein_coding|CODING|ACT38893||1|WARNING_TRANSCRIPT_NO_START_CODON),upstream_gene_variant(MODIFIER||3947||137|hns|protein_coding|CODING|ACT38890||1),upstream_gene_variant(MODIFIER||2113||543|oppA|protein_coding|CODING|ACT38894||1),upstream_gene_variant(…	383	556	COG1012	C	NO	.	.	.	.	.	.	.	.	.	.	.	.	.	.	.	.	.	.	.
1300075	A	G	SNP	missense_variant	MODERATE	Act/Gct	p.Thr434Ala/c.1300A>G	oppA	EFF=missense_variant(MODERATE|MISSENSE|Act/Gct|p.Thr434Ala/c.1300A>G|543|oppA|protein_coding|CODING|ACT38894|1|1),upstream_gene_variant(MODIFIER||418||306|oppB|protein_coding|CODING|ACT38895||1),upstream_gene_variant(MODIFIER||1353||302|oppC|protein_coding|CODING|ACT38896||1),upstream_gene_variant(MODIFIER||3161||891|adhE|protein_coding|CODING|ACT38892||1),upstream_gene_variant(MODIFIER||2273||33…	953	975	COG4166	E	NO	1298776	1300407	+	A1300G	-561.05	-561.38	1.18e-17	2.88e-18	343.99	365.17	0.4963	0.1522	1282-1331	0.1213	0.5079	1243-1323	0.2486	0.983122	0.950703
1301056	T	C	SNP	synonymous_variant	LOW	agT/agC	p.Ser188Ser/c.564T>C	oppB	EFF=synonymous_variant(LOW|SILENT|agT/agC|p.Ser188Ser/c.564T>C|306|oppB|protein_coding|CODING|ACT38895|1|1),upstream_gene_variant(MODIFIER||372||302|oppC|protein_coding|CODING|ACT38896||1),upstream_gene_variant(MODIFIER||4142||891|adhE|protein_coding|CODING|ACT38892||1),upstream_gene_variant(MODIFIER||1292||337|oppD|protein_coding|CODING|ACT38897||1),upstream_gene_variant(MODIFIER||2302||334|oppF…	335	86	COG0601	EP	NO	1300493	1301413	+	T564C	-330.02	-331.06	1e-11	1.49e-11	158.88	210.06	0.4738	0.0075	522-576	0.8408	0.9898	521-577	0.9109	0.998987	0.985535
1313799	A	G	SNP	upstream_gene_variant	MODIFIER	.	.	.	EFF=upstream_gene_variant(MODIFIER||3959||132|yciA|protein_coding|CODING|ACT38904||1),upstream_gene_variant(MODIFIER||3315||179|ispZ|protein_coding|CODING|ACT38905||1),upstream_gene_variant(MODIFIER||2542||247|yciC|protein_coding|CODING|ACT38906||1),upstream_gene_variant(MODIFIER||981||168|yciE|protein_coding|CODING|ACT38908||1),upstream_gene_variant(MODIFIER||435||166|yciF|protein_coding|CODING|…	.	.	NA	NA	.	.	.	.	.	.	.	.	.	.	.	.	.	.	.	.	.	.	.	.
1315236	A	G	SNP	synonymous_variant	LOW	ggT/ggC	p.Gly258Gly/c.774T>C	trpB	EFF=synonymous_variant(LOW|SILENT|ggT/ggC|p.Gly258Gly/c.774T>C|397|trpB|protein_coding|CODING|ACT38912|1|1),upstream_gene_variant(MODIFIER||4752||179|ispZ|protein_coding|CODING|ACT38905||1),upstream_gene_variant(MODIFIER||3979||247|yciC|protein_coding|CODING|ACT38906||1),upstream_gene_variant(MODIFIER||2418||168|yciE|protein_coding|CODING|ACT38908||1),upstream_gene_variant(MODIFIER||1872||166|yci…	26	235	COG0133	E	NO	1314816	1316009	-	T774C	-488.28	-490.63	3.57e-13	5.88e-13	271.83	263.6	0.5461	0.0029	673-793	0.9383	0.9946	676-771	0.9438	1	0.999999
1319304	C	T	SNP	missense_variant	MODERATE	Gcc/Acc	p.Ala413Thr/c.1237G>A	trpE	EFF=missense_variant(MODERATE|MISSENSE|Gcc/Acc|p.Ala413Thr/c.1237G>A|520|trpE|protein_coding|CODING|ACT38915|1|1),upstream_gene_variant(MODIFIER||4488||268|trpA|protein_coding|CODING|ACT38911||1),upstream_gene_variant(MODIFIER||1510||293|yciV|protein_coding|CODING|ACT38917||1),upstream_gene_variant(MODIFIER||3295||397|trpB|protein_coding|CODING|ACT38912||1),upstream_gene_variant(MODIFIER||2388||2…	4	204	COG0147	EH	NO	1318978	1320540	-	G1237A	-632.61	-629.84	5.15e-16	4.64e-16	264.32	263.38	0.5736	0.0568	1221-1281	0.4605	0.7958	1220-1273	0.5342	0.975812	0.899715
1332143	CT	C	DEL	upstream_gene_variant	MODIFIER	.	.	.	EFF=upstream_gene_variant(MODIFIER||83||324|cysB|protein_coding|CODING|ACT38927||1),upstream_gene_variant(MODIFIER||4660||252|yciK|protein_coding|CODING|ACT38923||1),upstream_gene_variant(MODIFIER||3104||83|yciN|protein_coding|CODING|ACT38925||1),upstream_gene_variant(MODIFIER||2059||891|acnA|protein_coding|CODING|ACT38928||1),downstream_gene_variant(MODIFIER||3391||349|sohB|protein_coding|CODING…	.	.	NA	NA	.	.	.	.	.	.	.	.	.	.	.	.	.	.	.	.	.	.	.	.
1342122	A	G	SNP	missense_variant	MODERATE	gTc/gCc	p.Val199Ala/c.596T>C	yciT	EFF=missense_variant(MODERATE|MISSENSE|gTc/gCc|p.Val199Ala/c.596T>C|249|yciT|protein_coding|CODING|ACT38936|1|1),upstream_gene_variant(MODIFIER||4590||196|ribA|protein_coding|CODING|ACT38929||1),upstream_gene_variant(MODIFIER||423||72|osmB|protein_coding|CODING|ACT38935||1),downstream_gene_variant(MODIFIER||1005||661|yciR|protein_coding|CODING|ACT38937||1),downstream_gene_variant(MODIFIER||3656||…	89	80	COG1349	KG	NO	1341968	1342717	-	T596C	-277.03	-276.13	1.02e-08	2.87e-09	81.5	136.16	0.4732	0.0716	586-635	0.3611	0.7278	584-634	0.4587	0.950786	0.706764
1354462	C	T	SNP	missense_variant	MODERATE	Gcc/Acc	p.Ala340Thr/c.1018G>A	sapA	EFF=missense_variant(MODERATE|MISSENSE|Gcc/Acc|p.Ala340Thr/c.1018G>A|547|sapA|protein_coding|CODING|ACT38946|1|1),upstream_gene_variant(MODIFIER||4333||117|ycjD|protein_coding|CODING|ACT38941||1|WARNING_TRANSCRIPT_NO_START_CODON),upstream_gene_variant(MODIFIER||3459||268|sapF|protein_coding|CODING|ACT38942||1),upstream_gene_variant(MODIFIER||2465||330|sapD|protein_coding|CODING|ACT38943||1),upstr…	58	40	COG4166	E	NO	1353836	1355479	-	G1018A	-676.06	-673.85	5.37e-17	1.76e-17	290.65	273.19	0.5486	0.1697	827-1113	0.1435	0.1358	882-1027	0.1145	0.984003	0.858811
1357632	A	AG	INS	upstream_gene_variant	MODIFIER	.	.	.	EFF=upstream_gene_variant(MODIFIER||4746||296|sapC|protein_coding|CODING|ACT38944||1),upstream_gene_variant(MODIFIER||3794||321|sapB|protein_coding|CODING|ACT38945||1),upstream_gene_variant(MODIFIER||1855||254|ycjL|protein_coding|CODING|ACT38950||1),upstream_gene_variant(MODIFIER||2646||185|ycjC|protein_coding|CODING|ACT38951||1),upstream_gene_variant(MODIFIER||2154||547|sapA|protein_coding|CODIN…	.	.	NA	NA	.	.	.	.	.	.	.	.	.	.	.	.	.	.	.	.	.	.	.	.
1357659	A	AG	INS	upstream_gene_variant	MODIFIER	.	.	.	EFF=upstream_gene_variant(MODIFIER||4773||296|sapC|protein_coding|CODING|ACT38944||1),upstream_gene_variant(MODIFIER||3821||321|sapB|protein_coding|CODING|ACT38945||1),upstream_gene_variant(MODIFIER||1828||254|ycjL|protein_coding|CODING|ACT38950||1),upstream_gene_variant(MODIFIER||2619||185|ycjC|protein_coding|CODING|ACT38951||1),upstream_gene_variant(MODIFIER||2181||547|sapA|protein_coding|CODIN…	.	.	NA	NA	.	.	.	.	.	.	.	.	.	.	.	.	.	.	.	.	.	.	.	.
1359810	T	C	SNP	missense_variant	MODERATE	aTc/aCc	p.Ile108Thr/c.323T>C	ycjL	EFF=missense_variant(MODERATE|MISSENSE|aTc/aCc|p.Ile108Thr/c.323T>C|254|ycjL|protein_coding|CODING|ACT38950|1|1),upstream_gene_variant(MODIFIER||469||185|ycjC|protein_coding|CODING|ACT38951||1),upstream_gene_variant(MODIFIER||4331||547|sapA|protein_coding|CODING|ACT38946||1),upstream_gene_variant(MODIFIER||3774||81|ymjA|protein_coding|CODING|ACT38947||1),upstream_gene_variant(MODIFIER||1301||495|…	8	62	COG2071	R	NO	1359488	1360252	+	T323C	-314.45	-312.53	2.54e-07	2.19e-07	218.26	139.37	0.5362	0.2656	229-338	0.0592	0.226	241-368	0.145	0.79749	0.653598
1361866	G	A	SNP	synonymous_variant	LOW	ctG/ctA	p.Leu252Leu/c.756G>A	aldH	EFF=synonymous_variant(LOW|SILENT|ctG/ctA|p.Leu252Leu/c.756G>A|495|aldH|protein_coding|CODING|ACT38952|1|1),upstream_gene_variant(MODIFIER||4311||461|ycjJ|protein_coding|CODING|ACT38948||1),upstream_gene_variant(MODIFIER||734||426|ordL|protein_coding|CODING|ACT38953||1),upstream_gene_variant(MODIFIER||2052||421|goaG|protein_coding|CODING|ACT38954||1),upstream_gene_variant(MODIFIER||2590||472|ycjK…	0	38	COG1012	C	NO	1361111	1362598	+	G756A	-667.6	-666.25	1.5e-18	2.13e-18	251.53	262.14	0.5711	0.1683	751-848	0.1453	0.1191	783-834	0.1095	0.974579	0.965554
1362825	T	C	SNP	missense_variant	MODERATE	Tcc/Ccc	p.Ser76Pro/c.226T>C	ordL	EFF=missense_variant(MODERATE|MISSENSE|Tcc/Ccc|p.Ser76Pro/c.226T>C|426|ordL|protein_coding|CODING|ACT38953|1|1),upstream_gene_variant(MODIFIER||1093||421|goaG|protein_coding|CODING|ACT38954||1),upstream_gene_variant(MODIFIER||3549||472|ycjK|protein_coding|CODING|ACT38949||1),upstream_gene_variant(MODIFIER||3622||222|pspA|protein_coding|CODING|ACT38956||1),upstream_gene_variant(MODIFIER||4344||74|…	0	36	COG0665	E	NO	1362600	1363880	+	T226C	-576.64	-576.06	5.39e-13	2.41e-13	318.01	296.93	0.5761	0.0092	205-254	0.8452	0.9307	205-254	0.7457	0.991102	0.988821
1365880	C	T	SNP	missense_variant	MODERATE	gGc/gAc	p.Gly134Asp/c.401G>A	pspF	EFF=missense_variant(MODERATE|MISSENSE|gGc/gAc|p.Gly134Asp/c.401G>A|325|pspF|protein_coding|CODING|ACT38955|1|1),upstream_gene_variant(MODIFIER||567||222|pspA|protein_coding|CODING|ACT38956||1),upstream_gene_variant(MODIFIER||1289||74|pspB|protein_coding|CODING|ACT38957||1),upstream_gene_variant(MODIFIER||1513||119|pspC|protein_coding|CODING|ACT38958||1),upstream_gene_variant(MODIFIER||1881||73|p…	16	35	COG1221	KT	NO	1365303	1366280	-	G401A	-397.49	-394.72	8.27e-10	7.62e-10	113.98	154.21	0.5362	0.0738	385-540	0.3805	0.5597	385-509	0.317	0.986656	0.904673
1368404	GT	G	DEL	upstream_gene_variant	MODIFIER	.	.	.	EFF=upstream_gene_variant(MODIFIER||179||559|ycjM|protein_coding|CODING|ACT38961||1),upstream_gene_variant(MODIFIER||1872||430|ycjN|protein_coding|CODING|ACT38962||1),upstream_gene_variant(MODIFIER||2125||325|pspF|protein_coding|CODING|ACT38955||1),upstream_gene_variant(MODIFIER||3185||293|ycjO|protein_coding|CODING|ACT38963||1),upstream_gene_variant(MODIFIER||4053||280|ycjP|protein_coding|CODING…	.	.	NA	NA	.	.	.	.	.	.	.	.	.	.	.	.	.	.	.	.	.	.	.	.
1377628	T	C	SNP	synonymous_variant	LOW	gtT/gtC	p.Val459Val/c.1377T>C	ycjT	EFF=synonymous_variant(LOW|SILENT|gtT/gtC|p.Val459Val/c.1377T>C|755|ycjT|protein_coding|CODING|ACT38968|1|1),upstream_gene_variant(MODIFIER||888||219|ycjU|protein_coding|CODING|ACT38969||1),upstream_gene_variant(MODIFIER||1561||360|ycjV|protein_coding|CODING|ACT38970||1),upstream_gene_variant(MODIFIER||2688||301|ompG|protein_coding|CODING|ACT38971||1),upstream_gene_variant(MODIFIER||4858||465|ycj…	0	15	COG1554	G	NO	1376252	1378519	+	T1377C	-958.65	-960.31	5.02e-23	1.22e-22	538.09	479.47	0.5087	0.0022	1315-1538	0.9504	0.9749	1386-1443	0.8598	0.993098	0.983139
1379004	G	A	SNP	synonymous_variant	LOW	ccG/ccA	p.Pro163Pro/c.489G>A	ycjU	EFF=synonymous_variant(LOW|SILENT|ccG/ccA|p.Pro163Pro/c.489G>A|219|ycjU|protein_coding|CODING|ACT38969|1|1),upstream_gene_variant(MODIFIER||185||360|ycjV|protein_coding|CODING|ACT38970||1),upstream_gene_variant(MODIFIER||1312||301|ompG|protein_coding|CODING|ACT38971||1),upstream_gene_variant(MODIFIER||3482||465|ycjX|protein_coding|CODING|ACT38973||1),upstream_gene_variant(MODIFIER||4876||353|ycjF…	0	23	COG0637	R	NO	1378516	1379175	+	G489A	-294.22	-293.26	3.21e-07	3.21e-07	104.73	104.72	0.5941	0	470-519	1	1	470-643	0.9997	1	0.999994
1380402	T	C	SNP	synonymous_variant	LOW	ttT/ttC	p.Phe29Phe/c.87T>C	ompG	EFF=synonymous_variant(LOW|SILENT|ttT/ttC|p.Phe29Phe/c.87T>C|301|ompG|protein_coding|CODING|ACT38971|1|1),upstream_gene_variant(MODIFIER||2084||465|ycjX|protein_coding|CODING|ACT38973||1),upstream_gene_variant(MODIFIER||3478||353|ycjF|protein_coding|CODING|ACT38974||1),upstream_gene_variant(MODIFIER||4687||513|tyrR|protein_coding|CODING|ACT38975||1),downstream_gene_variant(MODIFIER||4147||351|ycj…	0	31	NA	NA	NO	1380316	1381221	+	T87C	-350.57	-352.48	1.99e-10	2.09e-10	177.62	171.77	0.5261	0.0845	61-121	0.3478	0.718	61-188	0.4453	0.833284	0.765437
1391122	G	GA	INS	frameshift_variant	HIGH	gaa/gAaa	p.Glu255_Lys256fs/c.764_765insA	ycjZ	EFF=frameshift_variant(HIGH||gaa/gAaa|p.Glu255_Lys256fs/c.764_765insA|299|ycjZ|protein_coding|CODING|ACT38980|1|1),upstream_gene_variant(MODIFIER||473||537|mppA|protein_coding|CODING|ACT38981||1),upstream_gene_variant(MODIFIER||3943||168|tpx|protein_coding|CODING|ACT38976||1),upstream_gene_variant(MODIFIER||2096||262|ycjI|protein_coding|CODING|ACT38978||1),upstream_gene_variant(MODIFIER||3412||85…	36	48	COG0583	K	NO	.	.	.	.	.	.	.	.	.	.	.	.	.	.	.	.	.	.	.
1392293	A	G	SNP	missense_variant	MODERATE	gAt/gGt	p.Asp233Gly/c.698A>G	mppA	EFF=missense_variant(MODERATE|MISSENSE|gAt/gGt|p.Asp233Gly/c.698A>G|537|mppA|protein_coding|CODING|ACT38981|1|1),upstream_gene_variant(MODIFIER||3266||262|ycjI|protein_coding|CODING|ACT38978||1),upstream_gene_variant(MODIFIER||2242||85|ynaJ|protein_coding|CODING|ACT38983||1),upstream_gene_variant(MODIFIER||2059||310|ycjY|protein_coding|CODING|ACT38979||1),downstream_gene_variant(MODIFIER||967||34…	74	87	COG4166	E	NO	1391596	1393209	+	A698G-C908T	-596.22	-597.47	1.84e-16	1.73e-16	385.88	393.82	0.4812	0.2045	861-914	0.0676	0.3122	861-914	0.1502	0.968699	0.897441
1392503	C	T	SNP	missense_variant	MODERATE	cCg/cTg	p.Pro303Leu/c.908C>T	mppA	EFF=missense_variant(MODERATE|MISSENSE|cCg/cTg|p.Pro303Leu/c.908C>T|537|mppA|protein_coding|CODING|ACT38981|1|1),upstream_gene_variant(MODIFIER||3476||262|ycjI|protein_coding|CODING|ACT38978||1),upstream_gene_variant(MODIFIER||2032||85|ynaJ|protein_coding|CODING|ACT38983||1),upstream_gene_variant(MODIFIER||2269||310|ycjY|protein_coding|CODING|ACT38979||1),downstream_gene_variant(MODIFIER||757||34…	74	87	COG4166	E	NO	1391596	1393209	+	A698G-C908T	-596.22	-597.47	1.84e-16	1.73e-16	385.88	393.82	0.4812	0.2045	861-914	0.0676	0.3122	861-914	0.1502	0.968699	0.897441
1396528	T	C	SNP	missense_variant	MODERATE	Acg/Gcg	p.Thr57Ala/c.169A>G	fnr	EFF=missense_variant(MODERATE|MISSENSE|Acg/Gcg|p.Thr57Ala/c.169A>G|250|fnr|protein_coding|CODING|ACT38985|1|1),upstream_gene_variant(MODIFIER||2237||343|ynaI|protein_coding|CODING|ACT38982||1),upstream_gene_variant(MODIFIER||736||316|ydaA|protein_coding|CODING|ACT38984||1),downstream_gene_variant(MODIFIER||363||171|ogt|protein_coding|CODING|ACT38986||1),downstream_gene_variant(MODIFIER||889||508|…	813	396	COG0664	T	NO	1395944	1396696	-	A169G	-289.27	-289.27	2.69e-07	5.7e-08	146.33	243.7	0.4905	0.0507	165-364	0.4514	0.8616	227-363	0.6124	0.861	0.761531
1400829	C	T	SNP	missense_variant	MODERATE	Gcc/Acc	p.Ala303Thr/c.907G>A	abgA	EFF=missense_variant(MODERATE|MISSENSE|Gcc/Acc|p.Ala303Thr/c.907G>A|436|abgA|protein_coding|CODING|ACT38989|1|1),upstream_gene_variant(MODIFIER||4133||250|fnr|protein_coding|CODING|ACT38985||1),upstream_gene_variant(MODIFIER||1082||302|abgR|protein_coding|CODING|ACT38990||1),upstream_gene_variant(MODIFIER||3423||171|ogt|protein_coding|CODING|ACT38986||1),upstream_gene_variant(MODIFIER||2320||187|…	0	19	COG1473	R	NO	1400425	1401735	-	G907A	-578.12	-578.12	7.53e-14	8.33e-14	261.17	234.37	0.5736	0.043	864-913	0.5407	0.8701	868-917	0.6363	0.987828	0.94464
1404402	A	G	SNP	synonymous_variant	LOW	ccT/ccC	p.Pro188Pro/c.564T>C	ydaM	EFF=synonymous_variant(LOW|SILENT|ccT/ccC|p.Pro188Pro/c.564T>C|410|ydaM|protein_coding|CODING|ACT38992|1|1),upstream_gene_variant(MODIFIER||818||327|ydaN|protein_coding|CODING|ACT38993||1|WARNING_TRANSCRIPT_NO_START_CODON),upstream_gene_variant(MODIFIER||3977||481|abgB|protein_coding|CODING|ACT38988||1),upstream_gene_variant(MODIFIER||2279||457|dbpA|protein_coding|CODING|ACT38994||1|WARNING_TRANS…	4	139	COG2199	T	NO	1403733	1404965	-	T564C	-440.76	-439.62	2.54e-15	4.42e-15	199.46	223.97	0.4464	0.0393	540-592	0.5032	0.8853	543-593	0.6355	0.998522	0.974158
1406918	A	G	SNP	missense_variant	MODERATE	Acg/Gcg	p.Thr80Ala/c.238A>G	dbpA	EFF=missense_variant(MODERATE|MISSENSE|Acg/Gcg|p.Thr80Ala/c.238A>G|457|dbpA|protein_coding|CODING|ACT38994|1|1|WARNING_TRANSCRIPT_NO_START_CODON),upstream_gene_variant(MODIFIER||1953||410|ydaM|protein_coding|CODING|ACT38992||1),downstream_gene_variant(MODIFIER||4099||302|abgR|protein_coding|CODING|ACT38990||1),downstream_gene_variant(MODIFIER||1265||311|ydaO|protein_coding|CODING|ACT38995||1),dow…	33	26	COG0513	LKJ	NO	1406681	1408054	+	A238G-T881C	-595.54	-596.79	2.01e-14	4.55e-15	272.65	274.53	0.5259	0.2345	330-425	0.0783	-0.1575	349-425	0.0469	0.684223	0.503426
1407561	T	C	SNP	missense_variant	MODERATE	gTa/gCa	p.Val294Ala/c.881T>C	dbpA	EFF=missense_variant(MODERATE|MISSENSE|gTa/gCa|p.Val294Ala/c.881T>C|457|dbpA|protein_coding|CODING|ACT38994|1|1|WARNING_TRANSCRIPT_NO_START_CODON),upstream_gene_variant(MODIFIER||2596||410|ydaM|protein_coding|CODING|ACT38992||1),downstream_gene_variant(MODIFIER||4742||302|abgR|protein_coding|CODING|ACT38990||1),downstream_gene_variant(MODIFIER||622||311|ydaO|protein_coding|CODING|ACT38995||1),dow…	33	26	COG0513	LKJ	NO	1406681	1408054	+	A238G-T881C	-595.54	-596.79	2.01e-14	4.55e-15	272.65	274.53	0.5259	0.2345	330-425	0.0783	-0.1575	349-425	0.0469	0.684223	0.503426
1409617	A	G	SNP	synonymous_variant	LOW	ggT/ggC	p.Gly263Gly/c.789T>C	intR	EFF=synonymous_variant(LOW|SILENT|ggT/ggC|p.Gly263Gly/c.789T>C|411|intR|protein_coding|CODING|ACT38996|1|1),upstream_gene_variant(MODIFIER||4652||410|ydaM|protein_coding|CODING|ACT38992||1),upstream_gene_variant(MODIFIER||499||311|ydaO|protein_coding|CODING|ACT38995||1),downstream_gene_variant(MODIFIER||790||71|xisR|protein_coding|CODING|ACT38997||1),downstream_gene_variant(MODIFIER||1084||69|yda…	70	37	COG0582	L	NO	1409170	1410405	-	T789C	-387.97	-386.05	3.07e-14	2.68e-14	294.65	293.43	0.4489	0.0556	782-831	0.4003	0.8905	787-836	0.6446	0.995266	0.988644
1423100	G	A	SNP	missense_variant	MODERATE	tGc/tAc	p.Cys482Tyr/c.1445G>A	ECB_01342	EFF=missense_variant(MODERATE|MISSENSE|tGc/tAc|p.Cys482Tyr/c.1445G>A|741|ECB_01342|protein_coding|CODING|ACT39016|1|1),upstream_gene_variant(MODIFIER||778||92|ECB_01343|protein_coding|CODING|ACT39017||1),upstream_gene_variant(MODIFIER||1069||97|ECB_01344|protein_coding|CODING|ACT39018||1),downstream_gene_variant(MODIFIER||4576||99|rzpR|protein_coding|CODING|ACT39012||1),downstream_gene_variant(MO…	NA	NA	NA	NA	NO	1421656	1423881	+	G1445A	-816.79	-816.54	1.81e-23	2.18e-23	462.59	454.64	0.4539	0.0054	1315-1447	0.8758	0.9427	1316-1446	0.7538	0.973578	0.955952
1426401	A	AT	INS	upstream_gene_variant	MODIFIER	.	.	.	EFF=upstream_gene_variant(MODIFIER||1122||196|pinR|protein_coding|CODING|ACT39019||1),upstream_gene_variant(MODIFIER||539||88|ynaE|protein_coding|CODING|ACT39020||1),downstream_gene_variant(MODIFIER||4845||278|ECB_01341|protein_coding|CODING|ACT39015||1|WARNING_TRANSCRIPT_NO_START_CODON),downstream_gene_variant(MODIFIER||389||144|ynaF|protein_coding|CODING|ACT39021||1),downstream_gene_variant(MOD…	.	.	NA	NA	.	.	.	.	.	.	.	.	.	.	.	.	.	.	.	.	.	.	.	.
1428141	T	C	SNP	missense_variant	MODERATE	tAc/tGc	p.Tyr120Cys/c.359A>G	ompN	EFF=missense_variant(MODERATE|MISSENSE|tAc/tGc|p.Tyr120Cys/c.359A>G|377|ompN|protein_coding|CODING|ACT39022|1|1),upstream_gene_variant(MODIFIER||2861||196|pinR|protein_coding|CODING|ACT39019||1),upstream_gene_variant(MODIFIER||2278||88|ynaE|protein_coding|CODING|ACT39020||1),upstream_gene_variant(MODIFIER||916||144|ynaF|protein_coding|CODING|ACT39021||1),upstream_gene_variant(MODIFIER||4523||88|y…	1	21	COG3203	M	NO	1427366	1428499	-	A359G	-409.5	-411.51	1.03e-11	1.39e-11	151.03	150.54	0.4663	0.0226	329-458	0.6479	0.9287	339-458	0.7209	0.991526	0.991913
1431749	C	T	SNP	synonymous_variant	LOW	acG/acA	p.Thr214Thr/c.642G>A	ydbK	EFF=synonymous_variant(LOW|SILENT|acG/acA|p.Thr214Thr/c.642G>A|1174|ydbK|protein_coding|CODING|ACT39023|1|1),upstream_gene_variant(MODIFIER||4524||144|ynaF|protein_coding|CODING|ACT39021||1),upstream_gene_variant(MODIFIER||915||88|ydbJ|protein_coding|CODING|ACT39024||1),upstream_gene_variant(MODIFIER||3250||377|ompN|protein_coding|CODING|ACT39022||1),upstream_gene_variant(MODIFIER||2908||879|ydbH…	101	65	NA	NA	NO	1428866	1432390	-	G642A	-1462.2	-1458.9	3.28e-38	1.18e-37	830.11	870.21	0.5362	0.0064	604-653	0.8827	0.9702	462-538	0.8448	0.913354	0.835123
1446840	A	G	SNP	upstream_gene_variant	MODIFIER	.	.	.	EFF=upstream_gene_variant(MODIFIER||115||201|ynbA|protein_coding|CODING|ACT39037||1),upstream_gene_variant(MODIFIER||4439||572|tynA|protein_coding|CODING|ACT39032||1),upstream_gene_variant(MODIFIER||720||298|ynbB|protein_coding|CODING|ACT39038||1),upstream_gene_variant(MODIFIER||1632||585|ynbC|protein_coding|CODING|ACT39039||1),upstream_gene_variant(MODIFIER||3403||430|ynbD|protein_coding|CODING|…	.	.	NA	NA	.	.	.	.	.	.	.	.	.	.	.	.	.	.	.	.	.	.	.	.
1451166	A	G	SNP	synonymous_variant	LOW	ttA/ttG	p.Leu308Leu/c.924A>G	ynbD	EFF=synonymous_variant(LOW|SILENT|ttA/ttG|p.Leu308Leu/c.924A>G|430|ynbD|protein_coding|CODING|ACT39040|1|1),upstream_gene_variant(MODIFIER||1283||1281|hrpA|protein_coding|CODING|ACT39042||1),downstream_gene_variant(MODIFIER||420||201|acpD|protein_coding|CODING|ACT39041||1),downstream_gene_variant(MODIFIER||4382||768|ydbD|protein_coding|CODING|ACT39036||1),downstream_gene_variant(MODIFIER||3606||2…	3	55	COG0671	I	NO	1450243	1451535	+	A924G	-531.24	-531.22	3.87e-16	3e-16	334.32	321.96	0.5486	0.133	767-1116	0.2053	0.223	776-996	0.1438	0.998769	0.989076
1458524	A	G	SNP	missense_variant	MODERATE	aAc/aGc	p.Asn321Ser/c.962A>G	aldA	EFF=missense_variant(MODERATE|MISSENSE|aAc/aGc|p.Asn321Ser/c.962A>G|479|aldA|protein_coding|CODING|ACT39044|1|1),upstream_gene_variant(MODIFIER||1691||91|insA-12|protein_coding|CODING|ACT39046||1|WARNING_TRANSCRIPT_NO_START_CODON),upstream_gene_variant(MODIFIER||1885||167|insB-12|protein_coding|CODING|ACT39047||1),upstream_gene_variant(MODIFIER||2487||176|cybB|protein_coding|CODING|ACT39048||1),u…	32	966	COG1012	C	NO	1457563	1459002	+	A962G	-568.14	-571.48	6.77e-16	3.23e-15	361.07	354.29	0.5112	0.1048	941-1017	0.2736	0.3705	935-1018	0.2062	0.984325	0.945294
1465670	T	C	SNP	missense_variant	MODERATE	Tac/Cac	p.Tyr92His/c.274T>C	ydcJ	EFF=missense_variant(MODERATE|MISSENSE|Tac/Cac|p.Tyr92His/c.274T>C|447|ydcJ|protein_coding|CODING|ACT39054|1|1),upstream_gene_variant(MODIFIER||1325||541|ydcG|protein_coding|CODING|ACT39055||1),upstream_gene_variant(MODIFIER||3490||49|hokB|protein_coding|CODING|ACT39050||1),upstream_gene_variant(MODIFIER||3432||55|mokB|protein_coding|CODING|ACT39051||1),upstream_gene_variant(MODIFIER||3090||74|yd…	1	140	COG5383	S	NO	1465397	1466740	+	T274C	-556.41	-556.41	1.79e-15	1.59e-15	292.06	334.49	0.5262	0.0035	224-323	0.9277	0.9846	261-434	0.8952	0.980479	0.956352
1469011	C	CT	INS	upstream_gene_variant	MODIFIER	.	.	.	EFF=upstream_gene_variant(MODIFIER||35||179|rimL|protein_coding|CODING|ACT39058||1),upstream_gene_variant(MODIFIER||3832||307|ydcI|protein_coding|CODING|ACT39053||1),upstream_gene_variant(MODIFIER||1670||330|tehA|protein_coding|CODING|ACT39060||1),upstream_gene_variant(MODIFIER||2659||197|tehB|protein_coding|CODING|ACT39061||1),upstream_gene_variant(MODIFIER||3555||222|ydcL|protein_coding|CODING|…	.	.	NA	NA	.	.	.	.	.	.	.	.	.	.	.	.	.	.	.	.	.	.	.	.
1470372	C	T	SNP	missense_variant	MODERATE	Gac/Aac	p.Asp63Asn/c.187G>A	ydcK	EFF=missense_variant(MODERATE|MISSENSE|Gac/Aac|p.Asp63Asn/c.187G>A|326|ydcK|protein_coding|CODING|ACT39059|1|1),upstream_gene_variant(MODIFIER||310||330|tehA|protein_coding|CODING|ACT39060||1),upstream_gene_variant(MODIFIER||1299||197|tehB|protein_coding|CODING|ACT39061||1),upstream_gene_variant(MODIFIER||2195||222|ydcL|protein_coding|CODING|ACT39062||1),upstream_gene_variant(MODIFIER||1628||67|E…	4	64	COG1044	M	NO	.	.	.	.	.	.	.	.	.	.	.	.	.	.	.	.	.	.	.
1470491	AT	A	DEL	frameshift_variant	HIGH	aat/	p.Asn23fs/c.67delA	ydcK	EFF=frameshift_variant(HIGH||aat/|p.Asn23fs/c.67delA|326|ydcK|protein_coding|CODING|ACT39059|1|1),upstream_gene_variant(MODIFIER||190||330|tehA|protein_coding|CODING|ACT39060||1),upstream_gene_variant(MODIFIER||1179||197|tehB|protein_coding|CODING|ACT39061||1),upstream_gene_variant(MODIFIER||2075||222|ydcL|protein_coding|CODING|ACT39062||1),upstream_gene_variant(MODIFIER||1748||67|ECB_01382|prote…	4	64	COG1044	M	NO	.	.	.	.	.	.	.	.	.	.	.	.	.	.	.	.	.	.	.
1485496	A	G	SNP	missense_variant	MODERATE	Acc/Gcc	p.Thr209Ala/c.625A>G	ydcV	EFF=missense_variant(MODERATE|MISSENSE|Acc/Gcc|p.Thr209Ala/c.625A>G|264|ydcV|protein_coding|CODING|ACT39073|1|1),upstream_gene_variant(MODIFIER||192||474|ydcW|protein_coding|CODING|ACT39074||1),upstream_gene_variant(MODIFIER||2003||57|ydcX|protein_coding|CODING|ACT39075||1),upstream_gene_variant(MODIFIER||2262||77|ydcY|protein_coding|CODING|ACT39076||1),upstream_gene_variant(MODIFIER||3641||345|y…	1	133	COG1177	E	NO	1484872	1485666	+	A625G	-353.68	-353	5.54e-08	5.64e-08	128.65	128.69	0.5283	0	541-626	1	1	482-781	0.9995	1	0.999995
1489558	T	C	SNP	missense_variant	MODERATE	cTg/cCg	p.Leu141Pro/c.422T>C	yncB	EFF=missense_variant(MODERATE|MISSENSE|cTg/cCg|p.Leu141Pro/c.422T>C|345|yncB|protein_coding|CODING|ACT39079|1|1),upstream_gene_variant(MODIFIER||814||221|yncC|protein_coding|CODING|ACT39080||1),upstream_gene_variant(MODIFIER||3859||353|yncE|protein_coding|CODING|ACT39082||1),upstream_gene_variant(MODIFIER||1117||149|ydcZ|protein_coding|CODING|ACT39077||1),upstream_gene_variant(MODIFIER||602||172|…	2	43	COG2130	R	NO	1489137	1490174	+	T422C-C450T-C502T	-437.05	-439.75	7.75e-10	8.02e-10	278.51	272.15	0.5489	0.0821	494-599	0.3477	0.6246	494-599	0.3657	0.854482	0.605748
1489586	C	T	SNP	synonymous_variant	LOW	ggC/ggT	p.Gly150Gly/c.450C>T	yncB	EFF=synonymous_variant(LOW|SILENT|ggC/ggT|p.Gly150Gly/c.450C>T|345|yncB|protein_coding|CODING|ACT39079|1|1),upstream_gene_variant(MODIFIER||786||221|yncC|protein_coding|CODING|ACT39080||1),upstream_gene_variant(MODIFIER||3831||353|yncE|protein_coding|CODING|ACT39082||1),upstream_gene_variant(MODIFIER||1145||149|ydcZ|protein_coding|CODING|ACT39077||1),upstream_gene_variant(MODIFIER||630||172|yncA|…	2	43	COG2130	R	NO	1489137	1490174	+	T422C-C450T-C502T	-437.05	-439.75	7.75e-10	8.02e-10	278.51	272.15	0.5489	0.0821	494-599	0.3477	0.6246	494-599	0.3657	0.854482	0.605748
1489638	C	T	SNP	stop_gained	HIGH	Caa/Taa	p.Gln168*/c.502C>T	yncB	EFF=stop_gained(HIGH|NONSENSE|Caa/Taa|p.Gln168*/c.502C>T|345|yncB|protein_coding|CODING|ACT39079|1|1),upstream_gene_variant(MODIFIER||734||221|yncC|protein_coding|CODING|ACT39080||1),upstream_gene_variant(MODIFIER||3779||353|yncE|protein_coding|CODING|ACT39082||1),upstream_gene_variant(MODIFIER||1197||149|ydcZ|protein_coding|CODING|ACT39077||1),upstream_gene_variant(MODIFIER||682||172|yncA|protei…	2	43	COG2130	R	NO	1489137	1490174	+	T422C-C450T-C502T	-437.05	-439.75	7.75e-10	8.02e-10	278.51	272.15	0.5489	0.0821	494-599	0.3477	0.6246	494-599	0.3657	0.854482	0.605748
1491615	T	C	SNP	missense_variant	MODERATE	Acc/Gcc	p.Thr521Ala/c.1561A>G	yncD	EFF=missense_variant(MODERATE|MISSENSE|Acc/Gcc|p.Thr521Ala/c.1561A>G|700|yncD|protein_coding|CODING|ACT39081|1|1),upstream_gene_variant(MODIFIER||1802||353|yncE|protein_coding|CODING|ACT39082||1),upstream_gene_variant(MODIFIER||3174||149|ydcZ|protein_coding|CODING|ACT39077||1),upstream_gene_variant(MODIFIER||2659||172|yncA|protein_coding|CODING|ACT39078||1),upstream_gene_variant(MODIFIER||4744||2…	88	30	COG1629	P	NO	1491073	1493175	-	A1561G	-826.42	-829.42	2.83e-21	2.78e-21	610.35	609.46	0.4863	0.0088	1417-1616	0.8203	0.9322	1438-1487	0.7289	0.99666	0.99817
1507699	A	G	SNP	missense_variant	MODERATE	Tat/Cat	p.Tyr102His/c.304T>C	yddH	EFF=missense_variant(MODERATE|MISSENSE|Tat/Cat|p.Tyr102His/c.304T>C|189|yddH|protein_coding|CODING|ACT39093|1|1),upstream_gene_variant(MODIFIER||476||281|nhoA|protein_coding|CODING|ACT39094||1),downstream_gene_variant(MODIFIER||3199||1407|rhsE|protein_coding|CODING|ACT39087||1),downstream_gene_variant(MODIFIER||2733||160|ydcD|protein_coding|CODING|ACT39088||1),downstream_gene_variant(MODIFIER||23…	1	37	COG1853	R	NO	1507433	1508002	-	T304C	-225.57	-225.72	1.74e-06	1.95e-07	143.4	107.44	0.5312	0.0108	258-354	0.8248	0.8794	258-355	0.6511	0.943423	0.889331
1524237	G	A	SNP	missense_variant	MODERATE	cGt/cAt	p.Arg896His/c.2687G>A	fdnG	EFF=missense_variant(MODERATE|MISSENSE|cGt/cAt|p.Arg896His/c.2687G>A|1015|fdnG|protein_coding|CODING|ACT39104|1|1),upstream_gene_variant(MODIFIER||374||294|fdnH|protein_coding|CODING|ACT39105||1),upstream_gene_variant(MODIFIER||4372||318|yddK|protein_coding|CODING|ACT39101||1),upstream_gene_variant(MODIFIER||4058||96|yddL|protein_coding|CODING|ACT39102||1),upstream_gene_variant(MODIFIER||1251||21…	2	16	COG0243	C	NO	1521551	1524598	+	G2687A	-1292.43	-1291.05	1.39e-31	1.68e-32	538.94	491.89	0.5436	0.066	2649-2698	0.4147	0.5448	2648-2697	0.3067	0.97865	0.969577
1528716	AT	A	DEL	frameshift_variant	HIGH	aaa/	p.Lys297fs/c.891delA	sfcA	EFF=frameshift_variant(HIGH||aaa/|p.Lys297fs/c.891delA|565|sfcA|protein_coding|CODING|ACT39109|1|1),upstream_gene_variant(MODIFIER||1846||143|osmC|protein_coding|CODING|ACT39112||1),upstream_gene_variant(MODIFIER||2019||120|yddM|protein_coding|CODING|ACT39107||1),upstream_gene_variant(MODIFIER||941||336|adhP|protein_coding|CODING|ACT39108||1),downstream_gene_variant(MODIFIER||4119||1015|fdnG|prot…	127	119	COG0281	C	NO	.	.	.	.	.	.	.	.	.	.	.	.	.	.	.	.	.	.	.
1531240	A	G	SNP	missense_variant	MODERATE	cTc/cCc	p.Leu246Pro/c.737T>C	yddO	EFF=missense_variant(MODERATE|MISSENSE|cTc/cCc|p.Leu246Pro/c.737T>C|308|yddO|protein_coding|CODING|ACT39113|1|1|WARNING_TRANSCRIPT_NO_START_CODON),upstream_gene_variant(MODIFIER||4542||120|yddM|protein_coding|CODING|ACT39107||1),upstream_gene_variant(MODIFIER||3464||336|adhP|protein_coding|CODING|ACT39108||1),upstream_gene_variant(MODIFIER||1633||565|sfcA|protein_coding|CODING|ACT39109||1),upstre…	1	15	COG1124	EP	NO	1531050	1531976	-	T217C-T737C	-383.83	-385.97	8.59e-11	8.73e-11	187.65	187.48	0.5467	0.1009	725-774	0.285	0.7491	725-774	0.4809	0.986133	0.966572
1531760	A	G	SNP	missense_variant	MODERATE	Tac/Cac	p.Tyr73His/c.217T>C	yddO	EFF=missense_variant(MODERATE|MISSENSE|Tac/Cac|p.Tyr73His/c.217T>C|308|yddO|protein_coding|CODING|ACT39113|1|1|WARNING_TRANSCRIPT_NO_START_CODON),upstream_gene_variant(MODIFIER||3984||336|adhP|protein_coding|CODING|ACT39108||1),upstream_gene_variant(MODIFIER||2153||565|sfcA|protein_coding|CODING|ACT39109||1),upstream_gene_variant(MODIFIER||1859||45|rpsV|protein_coding|CODING|ACT39110||1),upstream…	1	15	COG1124	EP	NO	1531050	1531976	-	T217C-T737C	-383.83	-385.97	8.59e-11	8.73e-11	187.65	187.48	0.5467	0.1009	725-774	0.285	0.7491	725-774	0.4809	0.986133	0.966572
1532603	A	G	SNP	missense_variant	MODERATE	gTg/gCg	p.Val118Ala/c.353T>C	yddP	EFF=missense_variant(MODERATE|MISSENSE|gTg/gCg|p.Val118Ala/c.353T>C|328|yddP|protein_coding|CODING|ACT39114|1|1),upstream_gene_variant(MODIFIER||4827||336|adhP|protein_coding|CODING|ACT39108||1),upstream_gene_variant(MODIFIER||2996||565|sfcA|protein_coding|CODING|ACT39109||1),upstream_gene_variant(MODIFIER||2702||45|rpsV|protein_coding|CODING|ACT39110||1),upstream_gene_variant(MODIFIER||2385||71|…	0	25	COG0444	EP	NO	1531969	1532955	-	T353C	-405.71	-405.39	4.38e-11	4.43e-11	332.81	332.83	0.5312	0	318-367	0.9987	0.9998	313-362	0.9921	0.999989	0.999949
1533994	A	G	SNP	missense_variant	MODERATE	Tgg/Cgg	p.Trp292Arg/c.874T>C	yddR	EFF=missense_variant(MODERATE|MISSENSE|Tgg/Cgg|p.Trp292Arg/c.874T>C|340|yddR|protein_coding|CODING|ACT39116|1|1|WARNING_TRANSCRIPT_NO_START_CODON),upstream_gene_variant(MODIFIER||4387||565|sfcA|protein_coding|CODING|ACT39109||1),upstream_gene_variant(MODIFIER||4093||45|rpsV|protein_coding|CODING|ACT39110||1),upstream_gene_variant(MODIFIER||3776||71|bdm|protein_coding|CODING|ACT39111||1),upstream_…	1	36	COG0601	EP	NO	1533845	1534867	-	T874C	-460.24	-462.6	1.57e-11	2.16e-11	199.28	181.15	0.5343	0.0171	690-936	0.7657	0.8919	842-1022	0.6786	0.992918	0.923285
1535678	C	T	SNP	missense_variant	MODERATE	Gac/Aac	p.Asp248Asn/c.742G>A	yddS	EFF=missense_variant(MODERATE|MISSENSE|Gac/Aac|p.Asp248Asn/c.742G>A|516|yddS|protein_coding|CODING|ACT39117|1|1),upstream_gene_variant(MODIFIER||3702||308|yddO|protein_coding|CODING|ACT39113||1|WARNING_TRANSCRIPT_NO_START_CODON),upstream_gene_variant(MODIFIER||2723||328|yddP|protein_coding|CODING|ACT39114||1),upstream_gene_variant(MODIFIER||1830||298|yddQ|protein_coding|CODING|ACT39115||1),upstre…	0	70	COG0747	E	NO	1534869	1536419	-	G742A	-580.62	-579.75	1.4e-15	1.27e-15	352.63	251.41	0.5162	0.0052	715-765	0.9012	0.9797	675-816	0.8766	0.999069	0.967919
1544188	G	A	SNP	missense_variant	MODERATE	Ccg/Tcg	p.Pro85Ser/c.253C>T	xasA	EFF=missense_variant(MODERATE|MISSENSE|Ccg/Tcg|p.Pro85Ser/c.253C>T|511|xasA|protein_coding|CODING|ACT39122|1|1),upstream_gene_variant(MODIFIER||4517||799|dos|protein_coding|CODING|ACT39119||1),upstream_gene_variant(MODIFIER||3449||347|yddV|protein_coding|CODING|ACT39120||1|WARNING_TRANSCRIPT_NO_START_CODON),upstream_gene_variant(MODIFIER||1414||439|yddW|protein_coding|CODING|ACT39121||1),downstre…	2	160	COG0531	E	NO	1542905	1544440	-	C253T	-607.5	-609.43	4.71e-18	6.33e-18	375.38	344.18	0.4863	0.0651	248-452	0.3523	0.7249	226-382	0.4221	0.989192	0.973884
1548998	A	G	SNP	synonymous_variant	LOW	gcT/gcC	p.Ala52Ala/c.156T>C	pqqL	EFF=synonymous_variant(LOW|SILENT|gcT/gcC|p.Ala52Ala/c.156T>C|931|pqqL|protein_coding|CODING|ACT39124|1|1),upstream_gene_variant(MODIFIER||4558||511|xasA|protein_coding|CODING|ACT39122||1),upstream_gene_variant(MODIFIER||3002||466|gadB|protein_coding|CODING|ACT39123||1),downstream_gene_variant(MODIFIER||200||790|yddB|protein_coding|CODING|ACT39125||1),downstream_gene_variant(MODIFIER||2610||561|y…	21	34	COG0612	R	NO	1546358	1549153	-	T156C	-1018.47	-1019.76	7.51e-28	1.88e-27	433.17	422.25	0.4551	0.0189	98-156	0.7375	0.9457	119-168	0.795	0.995101	0.989775
1551947	A	G	SNP	synonymous_variant	LOW	tgT/tgC	p.Cys449Cys/c.1347T>C	yddA	EFF=synonymous_variant(LOW|SILENT|tgT/tgC|p.Cys449Cys/c.1347T>C|561|yddA|protein_coding|CODING|ACT39126|1|1),upstream_gene_variant(MODIFIER||2794||931|pqqL|protein_coding|CODING|ACT39124||1),upstream_gene_variant(MODIFIER||377||790|yddB|protein_coding|CODING|ACT39125||1),downstream_gene_variant(MODIFIER||1637||385|ydeM|protein_coding|CODING|ACT39127||1),downstream_gene_variant(MODIFIER||2846||560…	24	33	COG4178	R	NO	1551608	1553293	-	T1347C	-571	-569.65	3.39e-18	4.09e-18	332.17	335.64	0.4514	0.0143	1254-1360	0.7431	0.9346	1258-1350	0.7345	0.985651	0.904784
1560898	A	G	SNP	missense_variant	MODERATE	gTc/gCc	p.Val263Ala/c.788T>C	ydeQ	EFF=missense_variant(MODERATE|MISSENSE|gTc/gCc|p.Val263Ala/c.788T>C|304|ydeQ|protein_coding|CODING|ACT39132|1|1),upstream_gene_variant(MODIFIER||4423||560|ydeN|protein_coding|CODING|ACT39128||1),upstream_gene_variant(MODIFIER||3260||253|ydeO|protein_coding|CODING|ACT39129||1),upstream_gene_variant(MODIFIER||2988||65|ECB_01458|protein_coding|CODING|ACT39130||1),upstream_gene_variant(MODIFIER||461|…	1	17	NA	NA	NO	1560771	1561685	-	T788C	-319.12	-317.45	2.66e-10	2.78e-10	206.25	206.42	0.4634	0.0168	755-804	0.7156	0.9191	752-801	0.7008	0.994098	0.999731
1563100	T	C	SNP	missense_variant	MODERATE	Act/Gct	p.Thr285Ala/c.853A>G	ydeT	EFF=missense_variant(MODERATE|MISSENSE|Act/Gct|p.Thr285Ala/c.853A>G|382|ydeT|protein_coding|CODING|ACT39135|1|1),upstream_gene_variant(MODIFIER||2663||759|ydeP|protein_coding|CODING|ACT39131||1),upstream_gene_variant(MODIFIER||1415||304|ydeQ|protein_coding|CODING|ACT39132||1),upstream_gene_variant(MODIFIER||853||167|ydeR|protein_coding|CODING|ACT39133||1),upstream_gene_variant(MODIFIER||310||176|…	NA	NA	COG3188	NU	NO	1562804	1563952	-	A853G	-378.6	-382.16	5.54e-14	1.53e-13	370.97	367.76	0.4539	0.0504	820-869	0.4303	0.8375	823-872	0.5592	0.9884	0.996768
1564356	T	C	SNP	upstream_gene_variant	MODIFIER	.	.	.	EFF=upstream_gene_variant(MODIFIER||3919||759|ydeP|protein_coding|CODING|ACT39131||1),upstream_gene_variant(MODIFIER||2671||304|ydeQ|protein_coding|CODING|ACT39132||1),upstream_gene_variant(MODIFIER||2109||167|ydeR|protein_coding|CODING|ACT39133||1),upstream_gene_variant(MODIFIER||1566||176|ydeS|protein_coding|CODING|ACT39134||1),upstream_gene_variant(MODIFIER||404||382|ydeT|protein_coding|CODING…	.	.	NA	NA	.	.	.	.	.	.	.	.	.	.	.	.	.	.	.	.	.	.	.	.
1565408	A	G	SNP	upstream_gene_variant	MODIFIER	.	.	.	EFF=upstream_gene_variant(MODIFIER||4971||759|ydeP|protein_coding|CODING|ACT39131||1),upstream_gene_variant(MODIFIER||3723||304|ydeQ|protein_coding|CODING|ACT39132||1),upstream_gene_variant(MODIFIER||3161||167|ydeR|protein_coding|CODING|ACT39133||1),upstream_gene_variant(MODIFIER||2618||176|ydeS|protein_coding|CODING|ACT39134||1),upstream_gene_variant(MODIFIER||1456||382|ydeT|protein_coding|CODIN…	.	.	NA	NA	.	.	.	.	.	.	.	.	.	.	.	.	.	.	.	.	.	.	.	.
1569676	T	C	SNP	upstream_gene_variant	MODIFIER	.	.	.	EFF=upstream_gene_variant(MODIFIER||1111||265|ydeZ|protein_coding|CODING|ACT39139||1),upstream_gene_variant(MODIFIER||1920||340|yneA|protein_coding|CODING|ACT39140||1),upstream_gene_variant(MODIFIER||2573||178|yneL|protein_coding|CODING|ACT39136||1),upstream_gene_variant(MODIFIER||2969||291|yneB|protein_coding|CODING|ACT39141||1),upstream_gene_variant(MODIFIER||3868||96|yneC|protein_coding|CODING…	.	.	NA	NA	.	.	.	.	.	.	.	.	.	.	.	.	.	.	.	.	.	.	.	.
1570691	G	GC	INS	upstream_gene_variant	MODIFIER	.	.	.	EFF=upstream_gene_variant(MODIFIER||95||265|ydeZ|protein_coding|CODING|ACT39139||1),upstream_gene_variant(MODIFIER||904||340|yneA|protein_coding|CODING|ACT39140||1),upstream_gene_variant(MODIFIER||3589||178|yneL|protein_coding|CODING|ACT39136||1),upstream_gene_variant(MODIFIER||1953||291|yneB|protein_coding|CODING|ACT39141||1),upstream_gene_variant(MODIFIER||2852||96|yneC|protein_coding|CODING|AC…	.	.	NA	NA	.	.	.	.	.	.	.	.	.	.	.	.	.	.	.	.	.	.	.	.
1580853	G	A	SNP	synonymous_variant	LOW	ggC/ggT	p.Gly298Gly/c.894C>T	yneI	EFF=synonymous_variant(LOW|SILENT|ggC/ggT|p.Gly298Gly/c.894C>T|462|yneI|protein_coding|CODING|ACT39149|1|1),upstream_gene_variant(MODIFIER||994||293|yneJ|protein_coding|CODING|ACT39150||1),upstream_gene_variant(MODIFIER||3628||483|uxaB|protein_coding|CODING|ACT39145||1|WARNING_TRANSCRIPT_NO_START_CODON),upstream_gene_variant(MODIFIER||1953||371|yneK|protein_coding|CODING|ACT39151||1),upstream_gen…	11	41	COG0533	O	NO	1580358	1581746	-	C894T	-579.88	-579.53	1.85e-15	4.43e-15	356.07	314.34	0.5387	0.048	847-896	0.5099	0.7873	847-896	0.524	0.970117	0.965708
1592116	AT	A	DEL	frameshift_variant	HIGH	aaa/	p.Lys49fs/c.147delA	ydeI	EFF=frameshift_variant(HIGH||aaa/|p.Lys49fs/c.147delA|130|ydeI|protein_coding|CODING|ACT39162|1|1),upstream_gene_variant(MODIFIER||422||172|ydeJ|protein_coding|CODING|ACT39163||1|WARNING_TRANSCRIPT_NO_START_CODON),upstream_gene_variant(MODIFIER||3214||299|eamA|protein_coding|CODING|ACT39159||1),upstream_gene_variant(MODIFIER||3166||248|ydfG|protein_coding|CODING|ACT39165||1),upstream_gene_variant…	2	77	COG3111	S	NO	.	.	.	.	.	.	.	.	.	.	.	.	.	.	.	.	.	.	.
1594844	T	C	SNP	synonymous_variant	LOW	gaA/gaG	p.Glu101Glu/c.303A>G	dcp	EFF=synonymous_variant(LOW|SILENT|gaA/gaG|p.Glu101Glu/c.303A>G|681|dcp|protein_coding|CODING|ACT39164|1|1),upstream_gene_variant(MODIFIER||439||248|ydfG|protein_coding|CODING|ACT39165||1),upstream_gene_variant(MODIFIER||1274||228|ydfH|protein_coding|CODING|ACT39166||1),upstream_gene_variant(MODIFIER||3228||296|ydeH|protein_coding|CODING|ACT39161||1),upstream_gene_variant(MODIFIER||2137||67|ydfZ|p…	74	38	COG0826	O	NO	1593101	1595146	-	A303G	-806.68	-808.64	8.1e-22	8.74e-22	420.87	465.14	0.4863	0.0051	280-383	0.8808	0.9825	281-361	0.877	0.999917	0.998061
1595160	A	G	SNP	upstream_gene_variant	MODIFIER	.	.	.	EFF=upstream_gene_variant(MODIFIER||123||248|ydfG|protein_coding|CODING|ACT39165||1),upstream_gene_variant(MODIFIER||958||228|ydfH|protein_coding|CODING|ACT39166||1),upstream_gene_variant(MODIFIER||3544||296|ydeH|protein_coding|CODING|ACT39161||1),upstream_gene_variant(MODIFIER||1821||67|ydfZ|protein_coding|CODING|ACT39167||1),upstream_gene_variant(MODIFIER||2897||130|ydeI|protein_coding|CODING|A…	.	.	NA	NA	.	.	.	.	.	.	.	.	.	.	.	.	.	.	.	.	.	.	.	.
1595636	A	G	SNP	synonymous_variant	LOW	ttA/ttG	p.Leu118Leu/c.354A>G	ydfG	EFF=synonymous_variant(LOW|SILENT|ttA/ttG|p.Leu118Leu/c.354A>G|248|ydfG|protein_coding|CODING|ACT39165|1|1),upstream_gene_variant(MODIFIER||482||228|ydfH|protein_coding|CODING|ACT39166||1),upstream_gene_variant(MODIFIER||4020||296|ydeH|protein_coding|CODING|ACT39161||1),upstream_gene_variant(MODIFIER||1345||67|ydfZ|protein_coding|CODING|ACT39167||1),upstream_gene_variant(MODIFIER||3373||130|ydeI|…	118	227	COG4221	R	NO	1595283	1596029	+	A354G	-305.24	-305.27	1.37e-08	1.37e-08	129.34	129.38	0.5362	0	353-502	0.9999	1	353-502	0.9985	0.999997	0.999997
1603169	C	T	SNP	synonymous_variant	LOW	aaG/aaA	p.Lys15Lys/c.45G>A	ECB_01506	EFF=synonymous_variant(LOW|SILENT|aaG/aaA|p.Lys15Lys/c.45G>A|234|ECB_01506|protein_coding|CODING|ACT39173|1|1),upstream_gene_variant(MODIFIER||4489||486|ydfI|protein_coding|CODING|ACT39168||1),upstream_gene_variant(MODIFIER||3117||427|ydfJ|protein_coding|CODING|ACT39169||1),upstream_gene_variant(MODIFIER||671||97|ECB_01505|protein_coding|CODING|ACT39172||1),upstream_gene_variant(MODIFIER||4804||1…	NA	NA	NA	NA	NO	1602509	1603213	-	G45A	-229.29	-228.8	7.81e-08	1.05e-07	162.24	177.63	0.4082	0.0093	28-79	0.8107	0.9769	29-80	0.8477	0.99661	0.992853
1609910	AT	A	DEL	frameshift_variant	HIGH	aaa/	p.Lys21fs/c.63delA	gnsB	EFF=frameshift_variant(HIGH||aaa/|p.Lys21fs/c.63delA|57|gnsB|protein_coding|CODING|ACT39181|1|1),upstream_gene_variant(MODIFIER||4029||792|stfR|protein_coding|CODING|ACT39175||1),upstream_gene_variant(MODIFIER||3365||199|lomR|protein_coding|CODING|ACT39176||1),upstream_gene_variant(MODIFIER||1979||439|ECB_01510|protein_coding|CODING|ACT39177||1),upstream_gene_variant(MODIFIER||407||68|ybcW|protei…	153	145	NA	NA	NO	.	.	.	.	.	.	.	.	.	.	.	.	.	.	.	.	.	.	.
1610353	TA	T	DEL	upstream_gene_variant	MODIFIER	.	.	.	EFF=upstream_gene_variant(MODIFIER||4472||792|stfR|protein_coding|CODING|ACT39175||1),upstream_gene_variant(MODIFIER||3808||199|lomR|protein_coding|CODING|ACT39176||1),upstream_gene_variant(MODIFIER||2422||439|ECB_01510|protein_coding|CODING|ACT39177||1),upstream_gene_variant(MODIFIER||850||68|ybcW|protein_coding|CODING|ACT39180||1),upstream_gene_variant(MODIFIER||381||57|gnsB|protein_coding|CODI…	.	.	NA	NA	.	.	.	.	.	.	.	.	.	.	.	.	.	.	.	.	.	.	.	.
1613157	T	C	SNP	missense_variant	MODERATE	gAc/gGc	p.Asp63Gly/c.188A>G	essQ	EFF=missense_variant(MODERATE|MISSENSE|gAc/gGc|p.Asp63Gly/c.188A>G|71|essQ|protein_coding|CODING|ACT39188|1|1),upstream_gene_variant(MODIFIER||3653||68|ybcW|protein_coding|CODING|ACT39180||1),upstream_gene_variant(MODIFIER||3184||57|gnsB|protein_coding|CODING|ACT39181||1),upstream_gene_variant(MODIFIER||2856||51|ynfN|protein_coding|CODING|ACT39182||1),upstream_gene_variant(MODIFIER||2370||102|ins…	1	28	NA	NA	NO	1613129	1613344	-	A188G	-73.6	-74.26	0.0213014	0.017631	17.48	12.68	0.4676	0.0325	143-203	0.5648	0.8248	151-203	0.5465	0.950386	0.761567
1617938	GT	G	DEL	frameshift_variant	HIGH	aac/	p.Asn64fs/c.190delA	ECB_01528	EFF=frameshift_variant(HIGH||aac/|p.Asn64fs/c.190delA|126|ECB_01528|protein_coding|CODING|ACT39194|1|1),upstream_gene_variant(MODIFIER||4815||183|ydfR|protein_coding|CODING|ACT39187||1),upstream_gene_variant(MODIFIER||4595||71|essQ|protein_coding|CODING|ACT39188||1),upstream_gene_variant(MODIFIER||3691||237|ECB_01522|protein_coding|CODING|ACT39189||1),upstream_gene_variant(MODIFIER||2562||240|ECB…	NA	NA	NA	NA	NO	.	.	.	.	.	.	.	.	.	.	.	.	.	.	.	.	.	.	.
1618088	G	GC	INS	frameshift_variant	HIGH	gca/gGca	p.Ala14_Trp15fs/c.40_41insG	ECB_01528	EFF=frameshift_variant(HIGH||gca/gGca|p.Ala14_Trp15fs/c.40_41insG|126|ECB_01528|protein_coding|CODING|ACT39194|1|1),upstream_gene_variant(MODIFIER||4965||183|ydfR|protein_coding|CODING|ACT39187||1),upstream_gene_variant(MODIFIER||4745||71|essQ|protein_coding|CODING|ACT39188||1),upstream_gene_variant(MODIFIER||3841||237|ECB_01522|protein_coding|CODING|ACT39189||1),upstream_gene_variant(MODIFIER||2…	NA	NA	NA	NA	NO	.	.	.	.	.	.	.	.	.	.	.	.	.	.	.	.	.	.	.
1618839	G	A	SNP	missense_variant	MODERATE	Cca/Tca	p.Pro79Ser/c.235C>T	ECB_01530	EFF=missense_variant(MODERATE|MISSENSE|Cca/Tca|p.Pro79Ser/c.235C>T|92|ECB_01530|protein_coding|CODING|ACT39196|1|1),upstream_gene_variant(MODIFIER||4591||237|ECB_01522|protein_coding|CODING|ACT39189||1),upstream_gene_variant(MODIFIER||3462||240|ECB_01523|protein_coding|CODING|ACT39190||1|WARNING_TRANSCRIPT_NO_START_CODON),upstream_gene_variant(MODIFIER||711||126|ECB_01528|protein_coding|CODING|AC…	NA	NA	NA	NA	NO	1618795	1619073	-	C235T	-90.96	-90.96	0.0058645	0.00360228	15.62	15.94	0.5265	0	229-278	1	1	49-278	0.9993	0.999914	0.997753
1625053	T	C	SNP	upstream_gene_variant	MODIFIER	.	.	.	EFF=upstream_gene_variant(MODIFIER||4989||29|ECB_01533|protein_coding|CODING|ACT39199||1|WARNING_TRANSCRIPT_NO_START_CODON),upstream_gene_variant(MODIFIER||271||62|dicB|protein_coding|CODING|ACT39209||1),upstream_gene_variant(MODIFIER||456||63|ydfD|protein_coding|CODING|ACT39210||1),upstream_gene_variant(MODIFIER||741||823|ydfE|protein_coding|CODING|ACT39211||1),upstream_gene_variant(MODIFIER||38…	.	.	NA	NA	.	.	.	.	.	.	.	.	.	.	.	.	.	.	.	.	.	.	.	.
1626647	G	A	SNP	missense_variant	MODERATE	cGc/cAc	p.Arg285His/c.854G>A	ydfE	EFF=missense_variant(MODERATE|MISSENSE|cGc/cAc|p.Arg285His/c.854G>A|823|ydfE|protein_coding|CODING|ACT39211|1|1),upstream_gene_variant(MODIFIER||4900||140|ECB_01535|protein_coding|CODING|ACT39201||1|WARNING_TRANSCRIPT_NO_START_CODON),upstream_gene_variant(MODIFIER||3840||339|ECB_01536|protein_coding|CODING|ACT39202||1),upstream_gene_variant(MODIFIER||3452||153|ydfX|protein_coding|CODING|ACT39203|…	NA	NA	NA	NA	NO	1625794	1628265	+	G854A	-862.29	-860.63	4.46e-25	2.89e-25	506.56	490.66	0.4963	0.0059	708-1032	0.8673	0.9761	844-910	0.8521	0.997343	0.994225
1640409	T	C	SNP	synonymous_variant	LOW	tgT/tgC	p.Cys75Cys/c.225T>C	ynfG	EFF=synonymous_variant(LOW|SILENT|tgT/tgC|p.Cys75Cys/c.225T>C|205|ynfG|protein_coding|CODING|ACT39222|1|1),upstream_gene_variant(MODIFIER||395||284|ynfH|protein_coding|CODING|ACT39223||1),upstream_gene_variant(MODIFIER||1292||204|ynfI|protein_coding|CODING|ACT39224||1),upstream_gene_variant(MODIFIER||2101||418|ynfJ|protein_coding|CODING|ACT39225||1),downstream_gene_variant(MODIFIER||2719||808|ynf…	6	28	COG0437	C	NO	1640185	1640802	+	T225C	-234.54	-234.47	1.85e-07	3.2e-08	102.51	85.56	0.5212	0.0348	208-379	0.5978	0.8678	219-378	0.6327	0.86314	0.783568
1641959	T	C	SNP	missense_variant	MODERATE	Tgg/Cgg	p.Trp87Arg/c.259T>C	ynfI	EFF=missense_variant(MODERATE|MISSENSE|Tgg/Cgg|p.Trp87Arg/c.259T>C|204|ynfI|protein_coding|CODING|ACT39224|1|1),upstream_gene_variant(MODIFIER||551||418|ynfJ|protein_coding|CODING|ACT39225||1),upstream_gene_variant(MODIFIER||4935||417|ynfM|protein_coding|CODING|ACT39229||1|WARNING_TRANSCRIPT_NO_START_CODON),downstream_gene_variant(MODIFIER||4269||808|ynfE|protein_coding|CODING|ACT39220||1),downst…	39	37	COG3381	R	NO	1641701	1642315	+	T259C	-275.02	-275.02	6.89e-06	4.6e-06	120.03	130.23	0.5586	0.0142	213-264	0.7848	0.9867	209-261	0.9041	0.998089	0.99159
1644867	T	C	SNP	missense_variant	MODERATE	gAc/gGc	p.Asp298Gly/c.893A>G	mlc	EFF=missense_variant(MODERATE|MISSENSE|gAc/gGc|p.Asp298Gly/c.893A>G|406|mlc|protein_coding|CODING|ACT39227|1|1|WARNING_TRANSCRIPT_NO_START_CODON),upstream_gene_variant(MODIFIER||2027||417|ynfM|protein_coding|CODING|ACT39229||1|WARNING_TRANSCRIPT_NO_START_CODON),upstream_gene_variant(MODIFIER||3704||102|asr|protein_coding|CODING|ACT39230||1),upstream_gene_variant(MODIFIER||4288||273|ydgD|protein_c…	37	70	COG1940	KG	NO	1644539	1645759	-	A893G	-498.14	-500.36	1.4e-12	1.88e-12	205.78	245.49	0.5262	0.0464	855-904	0.5194	0.8525	856-907	0.6096	0.970275	0.926768
1647472	G	A	SNP	synonymous_variant	LOW	ctG/ctA	p.Leu193Leu/c.579G>A	ynfM	EFF=synonymous_variant(LOW|SILENT|ctG/ctA|p.Leu193Leu/c.579G>A|417|ynfM|protein_coding|CODING|ACT39229|1|1|WARNING_TRANSCRIPT_NO_START_CODON),upstream_gene_variant(MODIFIER||1099||102|asr|protein_coding|CODING|ACT39230||1),upstream_gene_variant(MODIFIER||1683||273|ydgD|protein_coding|CODING|ACT39231||1),upstream_gene_variant(MODIFIER||3058||231|ynfK|protein_coding|CODING|ACT39226||1),upstream_gen…	11	36	COG0477	GEPR	NO	1646894	1648147	+	G579A	-520.94	-519.31	2.21e-15	1.19e-15	381.78	380.91	0.5062	0.0027	561-668	0.9415	0.9874	561-640	0.9073	0.98919	0.946323
1650623	G	A	SNP	missense_variant	MODERATE	gCg/gTg	p.Ala25Val/c.74C>T	ydgF	EFF=missense_variant(MODERATE|MISSENSE|gCg/gTg|p.Ala25Val/c.74C>T|121|ydgF|protein_coding|CODING|ACT39233|1|1),upstream_gene_variant(MODIFIER||4864||406|mlc|protein_coding|CODING|ACT39227||1|WARNING_TRANSCRIPT_NO_START_CODON),upstream_gene_variant(MODIFIER||485||344|ydgG|protein_coding|CODING|ACT39234||1),upstream_gene_variant(MODIFIER||3836||297|ynfL|protein_coding|CODING|ACT39228||1),upstream_g…	25	46	COG2076	P	NO	1650331	1650696	-	C74T	-112.16	-112.14	2.87e-05	2.69e-05	153.33	118.99	0.3942	0.0067	1975-08-01	0.8436	0.9421	1975-02-01	0.7471	0.993876	0.948443
1664801	T	C	SNP	missense_variant	MODERATE	Acg/Gcg	p.Thr258Ala/c.772A>G	fumA	EFF=missense_variant(MODERATE|MISSENSE|Acg/Gcg|p.Thr258Ala/c.772A>G|548|fumA|protein_coding|CODING|ACT39245|1|1),upstream_gene_variant(MODIFIER||970||391|manA|protein_coding|CODING|ACT39246||1),upstream_gene_variant(MODIFIER||2246||502|ydgA|protein_coding|CODING|ACT39247||1),upstream_gene_variant(MODIFIER||1018||467|fumC|protein_coding|CODING|ACT39244||1),downstream_gene_variant(MODIFIER||4728||2…	87	404	COG1951	C	NO	1663926	1665572	-	A772G	-662.17	-664.7	1.71e-15	2.32e-15	263.27	231.56	0.5212	0.1393	729-778	0.1929	0.144	722-778	0.1171	0.935122	0.809165
1667598	A	G	SNP	synonymous_variant	LOW	agA/agG	p.Arg184Arg/c.552A>G	ydgA	EFF=synonymous_variant(LOW|SILENT|agA/agG|p.Arg184Arg/c.552A>G|502|ydgA|protein_coding|CODING|ACT39247|1|1),upstream_gene_variant(MODIFIER||3815||467|fumC|protein_coding|CODING|ACT39244||1),upstream_gene_variant(MODIFIER||2026||548|fumA|protein_coding|CODING|ACT39245||1),downstream_gene_variant(MODIFIER||1183||421|uidC|protein_coding|CODING|ACT39248||1),downstream_gene_variant(MODIFIER||2487||457…	236	249	COG5339	S	NO	1667047	1668555	+	A552G	-570.74	-573.95	1.92e-14	5.48e-14	323.56	299.74	0.4564	0.137	531-583	0.1447	0.3622	495-559	0.1715	0.967753	0.941189
1670494	G	A	SNP	missense_variant	MODERATE	gCg/gTg	p.Ala322Val/c.965C>T	uidB	EFF=missense_variant(MODERATE|MISSENSE|gCg/gTg|p.Ala322Val/c.965C>T|457|uidB|protein_coding|CODING|ACT39249|1|1),upstream_gene_variant(MODIFIER||4922||548|fumA|protein_coding|CODING|ACT39245||1),upstream_gene_variant(MODIFIER||448||421|uidC|protein_coding|CODING|ACT39248||1),downstream_gene_variant(MODIFIER||961||603|uidA|protein_coding|CODING|ACT39250||1),downstream_gene_variant(MODIFIER||3548||…	0	22	COG2211	G	NO	1670085	1671458	-	A653G-C965T	-577.36	-577.85	1.9e-15	2.54e-15	228.38	245.38	0.5203	0.1751	858-1035	0.1362	0.07	895-1003	0.0955	0.98796	0.958187
1670806	T	C	SNP	missense_variant	MODERATE	aAt/aGt	p.Asn218Ser/c.653A>G	uidB	EFF=missense_variant(MODERATE|MISSENSE|aAt/aGt|p.Asn218Ser/c.653A>G|457|uidB|protein_coding|CODING|ACT39249|1|1),upstream_gene_variant(MODIFIER||760||421|uidC|protein_coding|CODING|ACT39248||1),downstream_gene_variant(MODIFIER||649||603|uidA|protein_coding|CODING|ACT39250||1),downstream_gene_variant(MODIFIER||3860||391|manA|protein_coding|CODING|ACT39246||1),downstream_gene_variant(MODIFIER||2251…	0	22	COG2211	G	NO	1670085	1671458	-	A653G-C965T	-577.36	-577.85	1.9e-15	2.54e-15	228.38	245.38	0.5203	0.1751	858-1035	0.1362	0.07	895-1003	0.0955	0.98796	0.958187
1673645	AAG	A	DEL	upstream_gene_variant	MODIFIER	.	.	.	EFF=upstream_gene_variant(MODIFIER||3600||421|uidC|protein_coding|CODING|ACT39248||1),upstream_gene_variant(MODIFIER||2188||457|uidB|protein_coding|CODING|ACT39249||1),upstream_gene_variant(MODIFIER||2903||530|malX|protein_coding|CODING|ACT39254||1),upstream_gene_variant(MODIFIER||4505||390|malY|protein_coding|CODING|ACT39255||1),upstream_gene_variant(MODIFIER||380||603|uidA|protein_coding|CODING…	.	.	NA	NA	.	.	.	.	.	.	.	.	.	.	.	.	.	.	.	.	.	.	.	.
1679982	CCG	C	DEL	frameshift_variant	HIGH	cgc/	p.Arg186fs/c.557_558delCG	add	EFF=frameshift_variant(HIGH||cgc/|p.Arg186fs/c.557_558delCG|333|add|protein_coding|CODING|ACT39256|1|1),upstream_gene_variant(MODIFIER||4748||255|hdhA|protein_coding|CODING|ACT39252||1|WARNING_TRANSCRIPT_NO_START_CODON),upstream_gene_variant(MODIFIER||3609||342|malI|protein_coding|CODING|ACT39253||1),upstream_gene_variant(MODIFIER||1762||41|blr|protein_coding|CODING|ACT39258||1),upstream_gene_var…	77	48	COG1057	H	NO	.	.	.	.	.	.	.	.	.	.	.	.	.	.	.	.	.	.	.
1680406	G	A	SNP	missense_variant	MODERATE	cGa/cAa	p.Arg327Gln/c.980G>A	add	EFF=missense_variant(MODERATE|MISSENSE|cGa/cAa|p.Arg327Gln/c.980G>A|333|add|protein_coding|CODING|ACT39256|1|1),upstream_gene_variant(MODIFIER||4032||342|malI|protein_coding|CODING|ACT39253||1),upstream_gene_variant(MODIFIER||1339||41|blr|protein_coding|CODING|ACT39258||1),upstream_gene_variant(MODIFIER||1737||71|ydgT|protein_coding|CODING|ACT39259||1),upstream_gene_variant(MODIFIER||2038||146|yd…	77	48	COG1057	H	NO	.	.	.	.	.	.	.	.	.	.	.	.	.	.	.	.	.	.	.
1684320	C	T	SNP	missense_variant	MODERATE	Ccg/Tcg	p.Pro70Ser/c.208C>T	rnfC	EFF=missense_variant(MODERATE|MISSENSE|Ccg/Tcg|p.Pro70Ser/c.208C>T|740|rnfC|protein_coding|CODING|ACT39263|1|1),upstream_gene_variant(MODIFIER||2016||352|rnfD|protein_coding|CODING|ACT39264||1),upstream_gene_variant(MODIFIER||2818||346|ydgJ|protein_coding|CODING|ACT39257||1),upstream_gene_variant(MODIFIER||3078||206|rnfG|protein_coding|CODING|ACT39265||1),upstream_gene_variant(MODIFIER||3702||231…	61	28	COG4656	C	NO	1684113	1686335	+	C208T	-943.56	-938.06	1.35e-22	2.19e-23	589.48	712.53	0.5436	0.0444	198-273	0.5317	0.7052	202-272	0.4364	0.866575	0.82939
1687910	C	T	SNP	synonymous_variant	LOW	acC/acT	p.Thr171Thr/c.513C>T	rnfG	EFF=synonymous_variant(LOW|SILENT|acC/acT|p.Thr171Thr/c.513C>T|206|rnfG|protein_coding|CODING|ACT39265|1|1),upstream_gene_variant(MODIFIER||112||231|rnfE|protein_coding|CODING|ACT39266||1|WARNING_TRANSCRIPT_NO_START_CODON),upstream_gene_variant(MODIFIER||807||211|nth|protein_coding|CODING|ACT39267||1),upstream_gene_variant(MODIFIER||2053||500|ydgR|protein_coding|CODING|ACT39268||1|WARNING_TRANSCR…	95	37	COG4659	C	NO	1687398	1688018	+	C513T	-237.81	-235.45	3.64e-07	3.58e-07	146.41	146.99	0.5405	0.0529	504-572	0.494	0.5912	523-572	0.3421	0.982068	0.924791
1691512	CT	C	DEL	upstream_gene_variant	MODIFIER	.	.	.	EFF=upstream_gene_variant(MODIFIER||58||201|gst|protein_coding|CODING|ACT39269||1),downstream_gene_variant(MODIFIER||707||287|pdxY|protein_coding|CODING|ACT39270||1),downstream_gene_variant(MODIFIER||4119||352|rnfD|protein_coding|CODING|ACT39264||1),downstream_gene_variant(MODIFIER||3495||206|rnfG|protein_coding|CODING|ACT39265||1),downstream_gene_variant(MODIFIER||1629||424|tyrS|protein_coding|C…	.	.	NA	NA	.	.	.	.	.	.	.	.	.	.	.	.	.	.	.	.	.	.	.	.
1701461	G	A	SNP	missense_variant	MODERATE	gCg/gTg	p.Ala130Val/c.389C>T	sodC	EFF=missense_variant(MODERATE|MISSENSE|gCg/gTg|p.Ala130Val/c.389C>T|173|sodC|protein_coding|CODING|ACT39280|1|1),upstream_gene_variant(MODIFIER||4665||369|ydhH|protein_coding|CODING|ACT39274||1),upstream_gene_variant(MODIFIER||3443||144|slyA|protein_coding|CODING|ACT39276||1),upstream_gene_variant(MODIFIER||1840||171|ydhM|protein_coding|CODING|ACT39283||1),upstream_gene_variant(MODIFIER||2392||36…	14	93	COG2032	P	NO	.	.	.	.	.	.	.	.	.	.	.	.	.	.	.	.	.	.	.
1701666	C	CGG	INS	frameshift_variant	HIGH	ccc/cccCC	p.Pro61_Gly62fs/c.183_184insCC	sodC	EFF=frameshift_variant(HIGH||ccc/cccCC|p.Pro61_Gly62fs/c.183_184insCC|173|sodC|protein_coding|CODING|ACT39280|1|1),upstream_gene_variant(MODIFIER||4871||369|ydhH|protein_coding|CODING|ACT39274||1),upstream_gene_variant(MODIFIER||3649||144|slyA|protein_coding|CODING|ACT39276||1),upstream_gene_variant(MODIFIER||1634||171|ydhM|protein_coding|CODING|ACT39283||1),upstream_gene_variant(MODIFIER||2186||…	14	93	COG2032	P	NO	.	.	.	.	.	.	.	.	.	.	.	.	.	.	.	.	.	.	.
1709109	C	T	SNP	synonymous_variant	LOW	gaC/gaT	p.Asp943Asp/c.2829C>T	lhr	EFF=synonymous_variant(LOW|SILENT|gaC/gaT|p.Asp943Asp/c.2829C>T|1538|lhr|protein_coding|CODING|ACT39287|1|1),upstream_gene_variant(MODIFIER||2520||271|ydhO|protein_coding|CODING|ACT39289||1|WARNING_TRANSCRIPT_NO_START_CODON),upstream_gene_variant(MODIFIER||3463||193|sodB|protein_coding|CODING|ACT39290||1),downstream_gene_variant(MODIFIER||4159||365|nemA|protein_coding|CODING|ACT39284||1),downstre…	3	31	COG1201	R	NO	.	.	.	.	.	.	.	.	.	.	.	.	.	.	.	.	.	.	.
1716073	G	A	SNP	synonymous_variant	LOW	gtG/gtA	p.Val321Val/c.963G>A	purR	EFF=synonymous_variant(LOW|SILENT|gtG/gtA|p.Val321Val/c.963G>A|341|purR|protein_coding|CODING|ACT39293|1|1),upstream_gene_variant(MODIFIER||4778||115|ydhD|protein_coding|CODING|ACT39288||1),upstream_gene_variant(MODIFIER||1105||403|ydhC|protein_coding|CODING|ACT39295||1),upstream_gene_variant(MODIFIER||2607||382|cfa|protein_coding|CODING|ACT39296||1),upstream_gene_variant(MODIFIER||1516||389|ydhP…	216	156	COG1609	K	NO	1715111	1716136	+	G963A	-451.56	-448.04	7.73e-10	7.98e-10	76.17	74.71	0.553	0.1521	951-1000	0.1692	0.0862	930-979	0.0921	0.889262	0.888613
1720585	G	A	SNP	upstream_gene_variant	MODIFIER	.	.	.	EFF=upstream_gene_variant(MODIFIER||139||457|norM|protein_coding|CODING|ACT39298||1|WARNING_TRANSCRIPT_NO_START_CODON),upstream_gene_variant(MODIFIER||3520||310|ydhB|protein_coding|CODING|ACT39294||1),upstream_gene_variant(MODIFIER||3117|||valV|tRNA|NON_CODING|ECB_t00027||1),upstream_gene_variant(MODIFIER||3198|||valW|tRNA|NON_CODING|ECB_t00028||1),upstream_gene_variant(MODIFIER||3382||101|ydhR|p…	.	.	NA	NA	.	.	.	.	.	.	.	.	.	.	.	.	.	.	.	.	.	.	.	.
1722046	G	A	SNP	synonymous_variant	LOW	cgG/cgA	p.Arg441Arg/c.1323G>A	norM	EFF=synonymous_variant(LOW|SILENT|cgG/cgA|p.Arg441Arg/c.1323G>A|457|norM|protein_coding|CODING|ACT39298|1|1|WARNING_TRANSCRIPT_NO_START_CODON),upstream_gene_variant(MODIFIER||4981||310|ydhB|protein_coding|CODING|ACT39294||1),upstream_gene_variant(MODIFIER||1656|||valV|tRNA|NON_CODING|ECB_t00027||1),upstream_gene_variant(MODIFIER||1737|||valW|tRNA|NON_CODING|ECB_t00028||1),upstream_gene_variant(MO…	26	42	COG0534	V	NO	1720724	1722097	+	G1323A	-586.43	-583.94	2.72e-14	2.12e-15	362.33	385.35	0.5119	0.0135	1307-1356	0.7824	0.8062	1304-1353	0.5274	0.995902	0.997519
1730800	C	CA	INS	frameshift_variant	HIGH	ttt/tttT	p.Phe99_Ala100fs/c.297_298insT	ydhV	EFF=frameshift_variant(HIGH||ttt/tttT|p.Phe99_Ala100fs/c.297_298insT|700|ydhV|protein_coding|CODING|ACT39306|1|1),upstream_gene_variant(MODIFIER||3975||270|ydhT|protein_coding|CODING|ACT39302||1),upstream_gene_variant(MODIFIER||3186||261|ydhU|protein_coding|CODING|ACT39303||1),upstream_gene_variant(MODIFIER||2164||470|pykF|protein_coding|CODING|ACT39309||1),upstream_gene_variant(MODIFIER||2521||2…	0	22	COG2414	C	NO	.	.	.	.	.	.	.	.	.	.	.	.	.	.	.	.	.	.	.
1730964	A	G	SNP	missense_variant	MODERATE	gTa/gCa	p.Val45Ala/c.134T>C	ydhV	EFF=missense_variant(MODERATE|MISSENSE|gTa/gCa|p.Val45Ala/c.134T>C|700|ydhV|protein_coding|CODING|ACT39306|1|1),upstream_gene_variant(MODIFIER||4138||270|ydhT|protein_coding|CODING|ACT39302||1),upstream_gene_variant(MODIFIER||3349||261|ydhU|protein_coding|CODING|ACT39303||1),upstream_gene_variant(MODIFIER||2001||470|pykF|protein_coding|CODING|ACT39309||1),upstream_gene_variant(MODIFIER||2684||222…	0	22	COG2414	C	NO	.	.	.	.	.	.	.	.	.	.	.	.	.	.	.	.	.	.	.
1731842	A	G	SNP	upstream_gene_variant	MODIFIER	.	.	.	EFF=upstream_gene_variant(MODIFIER||4227||261|ydhU|protein_coding|CODING|ACT39303||1),upstream_gene_variant(MODIFIER||1123||470|pykF|protein_coding|CODING|ACT39309||1),upstream_gene_variant(MODIFIER||3562||222|ydhX|protein_coding|CODING|ACT39304||1),upstream_gene_variant(MODIFIER||2851||215|ydhW|protein_coding|CODING|ACT39305||1),upstream_gene_variant(MODIFIER||2846||78|lpp|protein_coding|CODING|…	.	.	NA	NA	.	.	.	.	.	.	.	.	.	.	.	.	.	.	.	.	.	.	.	.
1733173	C	A	SNP	missense_variant	MODERATE	cCg/cAg	p.Pro70Gln/c.209C>A	pykF	EFF=missense_variant(MODERATE|MISSENSE|cCg/cAg|p.Pro70Gln/c.209C>A|470|pykF|protein_coding|CODING|ACT39309|1|1),upstream_gene_variant(MODIFIER||4893||222|ydhX|protein_coding|CODING|ACT39304||1),upstream_gene_variant(MODIFIER||4182||215|ydhW|protein_coding|CODING|ACT39305||1),upstream_gene_variant(MODIFIER||1515||78|lpp|protein_coding|CODING|ACT39310||1),upstream_gene_variant(MODIFIER||2076||700|y…	1040	422	COG0469	G	NO	1732965	1734377	+	C209A-A507G	-519.68	-524.59	1.01e-15	1.08e-15	229.88	214.06	0.4793	0.0337	435-514	0.5466	0.9072	435-514	0.6761	0.990272	0.986449
1733471	A	G	SNP	synonymous_variant	LOW	gcA/gcG	p.Ala169Ala/c.507A>G	pykF	EFF=synonymous_variant(LOW|SILENT|gcA/gcG|p.Ala169Ala/c.507A>G|470|pykF|protein_coding|CODING|ACT39309|1|1),upstream_gene_variant(MODIFIER||4480||215|ydhW|protein_coding|CODING|ACT39305||1),upstream_gene_variant(MODIFIER||1217||78|lpp|protein_coding|CODING|ACT39310||1),upstream_gene_variant(MODIFIER||2374||700|ydhV|protein_coding|CODING|ACT39306||1),upstream_gene_variant(MODIFIER||1727||208|ydhY|…	1040	422	COG0469	G	NO	1732965	1734377	+	C209A-A507G	-519.68	-524.59	1.01e-15	1.08e-15	229.88	214.06	0.4793	0.0337	435-514	0.5466	0.9072	435-514	0.6761	0.990272	0.986449
1734516	A	G	SNP	upstream_gene_variant	MODIFIER	.	.	.	EFF=upstream_gene_variant(MODIFIER||172||78|lpp|protein_coding|CODING|ACT39310||1),upstream_gene_variant(MODIFIER||3419||700|ydhV|protein_coding|CODING|ACT39306||1),upstream_gene_variant(MODIFIER||2772||208|ydhY|protein_coding|CODING|ACT39307||1),upstream_gene_variant(MODIFIER||2108||69|ydhZ|protein_coding|CODING|ACT39308||1),downstream_gene_variant(MODIFIER||472||334|ynhG|protein_coding|CODING|A…	.	.	NA	NA	.	.	.	.	.	.	.	.	.	.	.	.	.	.	.	.	.	.	.	.
1734965	AT	A	DEL	upstream_gene_variant	MODIFIER	.	.	.	EFF=upstream_gene_variant(MODIFIER||3869||700|ydhV|protein_coding|CODING|ACT39306||1),upstream_gene_variant(MODIFIER||3222||208|ydhY|protein_coding|CODING|ACT39307||1),upstream_gene_variant(MODIFIER||2558||69|ydhZ|protein_coding|CODING|ACT39308||1),downstream_gene_variant(MODIFIER||22||334|ynhG|protein_coding|CODING|ACT39311||1),downstream_gene_variant(MODIFIER||1175||138|sufE|protein_coding|CODI…	.	.	NA	NA	.	.	.	.	.	.	.	.	.	.	.	.	.	.	.	.	.	.	.	.
1735368	A	G	SNP	missense_variant	MODERATE	Tgt/Cgt	p.Cys209Arg/c.625T>C	ynhG	EFF=missense_variant(MODERATE|MISSENSE|Tgt/Cgt|p.Cys209Arg/c.625T>C|334|ynhG|protein_coding|CODING|ACT39311|1|1),upstream_gene_variant(MODIFIER||4271||700|ydhV|protein_coding|CODING|ACT39306||1),upstream_gene_variant(MODIFIER||3624||208|ydhY|protein_coding|CODING|ACT39307||1),upstream_gene_variant(MODIFIER||2960||69|ydhZ|protein_coding|CODING|ACT39308||1),downstream_gene_variant(MODIFIER||773||13…	10	55	NA	NA	NO	1734988	1735992	-	T625C	-404.76	-406.33	7.54e-09	7.95e-09	117.8	114.89	0.5461	0.0625	616-665	0.4314	0.8746	615-664	0.6434	0.993715	0.883609
1746200	AT	A	DEL	upstream_gene_variant	MODIFIER	.	.	.	EFF=upstream_gene_variant(MODIFIER||4925||495|sufB|protein_coding|CODING|ACT39316||1),upstream_gene_variant(MODIFIER||140||370|ydiK|protein_coding|CODING|ACT39321||1),upstream_gene_variant(MODIFIER||4548||122|sufA|protein_coding|CODING|ACT39317||1),upstream_gene_variant(MODIFIER||3731||89|ydiH|protein_coding|CODING|ACT39318||1|WARNING_TRANSCRIPT_NO_START_CODON),upstream_gene_variant(MODIFIER||168…	.	.	NA	NA	.	.	.	.	.	.	.	.	.	.	.	.	.	.	.	.	.	.	.	.
1746738	T	TG	INS	frameshift_variant	HIGH	atg/atGg	p.Met133_Gly134fs/c.399_400insG	ydiK	EFF=frameshift_variant(HIGH||atg/atGg|p.Met133_Gly134fs/c.399_400insG|370|ydiK|protein_coding|CODING|ACT39321|1|1),upstream_gene_variant(MODIFIER||4269||89|ydiH|protein_coding|CODING|ACT39318||1|WARNING_TRANSCRIPT_NO_START_CODON),upstream_gene_variant(MODIFIER||1143||118|ydiL|protein_coding|CODING|ACT39322||1),upstream_gene_variant(MODIFIER||3840||136|ydiI|protein_coding|CODING|ACT39319||1),upstr…	71	98	COG0628	R	NO	.	.	.	.	.	.	.	.	.	.	.	.	.	.	.	.	.	.	.
1748728	C	T	SNP	upstream_gene_variant	MODIFIER	.	.	.	EFF=upstream_gene_variant(MODIFIER||1050||421|ydiN|protein_coding|CODING|ACT39323||1),upstream_gene_variant(MODIFIER||2776||1018|ydiJ|protein_coding|CODING|ACT39320||1),upstream_gene_variant(MODIFIER||2327||288|ydiB|protein_coding|CODING|ACT39324||1),upstream_gene_variant(MODIFIER||3224||252|aroD|protein_coding|CODING|ACT39325||1),upstream_gene_variant(MODIFIER||4127||531|ydiF|protein_coding|CODI…	.	.	NA	NA	.	.	.	.	.	.	.	.	.	.	.	.	.	.	.	.	.	.	.	.
1752751	TA	T	DEL	upstream_gene_variant	MODIFIER	.	.	.	EFF=upstream_gene_variant(MODIFIER||103||531|ydiF|protein_coding|CODING|ACT39326||1),upstream_gene_variant(MODIFIER||1712||383|ydiO|protein_coding|CODING|ACT39327||1),upstream_gene_variant(MODIFIER||4133||254|ydiQ|protein_coding|CODING|ACT39329||1),upstream_gene_variant(MODIFIER||4917||312|ydiR|protein_coding|CODING|ACT39330||1),downstream_gene_variant(MODIFIER||4514||118|ydiL|protein_coding|CODI…	.	.	NA	NA	.	.	.	.	.	.	.	.	.	.	.	.	.	.	.	.	.	.	.	.
1768644	G	A	SNP	synonymous_variant	LOW	ttC/ttT	p.Phe158Phe/c.474C>T	ydiV	EFF=synonymous_variant(LOW|SILENT|ttC/ttT|p.Phe158Phe/c.474C>T|180|ydiV|protein_coding|CODING|ACT39339|1|1),upstream_gene_variant(MODIFIER||4264||792|ppsA|protein_coding|CODING|ACT39334||1),upstream_gene_variant(MODIFIER||132||478|ydiU|protein_coding|CODING|ACT39338||1),downstream_gene_variant(MODIFIER||890||154|nlpC|protein_coding|CODING|ACT39340||1),downstream_gene_variant(MODIFIER||1432||249|b…	17	32	COG2200	T	NO	1768575	1769117	-	C474T	-165.89	-164.3	1.68e-07	2.35e-07	69.6	77.85	0.4778	0.0175	427-506	0.7165	0.8594	439-493	0.6022	0.948966	0.869966
1770543	T	C	SNP	missense_variant	MODERATE	Aca/Gca	p.Thr95Ala/c.283A>G	btuD	EFF=missense_variant(MODERATE|MISSENSE|Aca/Gca|p.Thr95Ala/c.283A>G|249|btuD|protein_coding|CODING|ACT39341|1|1),upstream_gene_variant(MODIFIER||2031||478|ydiU|protein_coding|CODING|ACT39338||1),upstream_gene_variant(MODIFIER||1426||180|ydiV|protein_coding|CODING|ACT39339||1),upstream_gene_variant(MODIFIER||545||154|nlpC|protein_coding|CODING|ACT39340||1),downstream_gene_variant(MODIFIER||4997||27…	35	125	COG4138	H	NO	1770076	1770825	-	A283G	-325.61	-328.09	1.78e-08	6.14e-09	164.52	99.99	0.5661	0.3995	242-291	0.0187	0.0429	238-287	0.0884	0.956288	0.862666
1781555	G	A	SNP	upstream_gene_variant	MODIFIER	.	.	.	EFF=upstream_gene_variant(MODIFIER||4539||118|rplT|protein_coding|CODING|ACT39348||1),upstream_gene_variant(MODIFIER||4289||65|rpmI|protein_coding|CODING|ACT39349||1),upstream_gene_variant(MODIFIER||860||40|ECB_01690|protein_coding|CODING|ACT39352||1),upstream_gene_variant(MODIFIER||3758||144|infC|protein_coding|CODING|ACT39350||1|WARNING_TRANSCRIPT_NO_START_CODON),upstream_gene_variant(MODIFIER|…	.	.	NA	NA	.	.	.	.	.	.	.	.	.	.	.	.	.	.	.	.	.	.	.	.
1783360	C	T	SNP	upstream_gene_variant	MODIFIER	.	.	.	EFF=upstream_gene_variant(MODIFIER||275||309|pfkB|protein_coding|CODING|ACT39354||1),upstream_gene_variant(MODIFIER||1305||96|ydiZ|protein_coding|CODING|ACT39355||1),upstream_gene_variant(MODIFIER||3523||642|thrS|protein_coding|CODING|ACT39351||1),upstream_gene_variant(MODIFIER||1701||286|yniA|protein_coding|CODING|ACT39356||1),upstream_gene_variant(MODIFIER||3285||222|yniC|protein_coding|CODING|…	.	.	NA	NA	.	.	.	.	.	.	.	.	.	.	.	.	.	.	.	.	.	.	.	.
1783610	T	C	SNP	upstream_gene_variant	MODIFIER	.	.	.	EFF=upstream_gene_variant(MODIFIER||25||309|pfkB|protein_coding|CODING|ACT39354||1),upstream_gene_variant(MODIFIER||1055||96|ydiZ|protein_coding|CODING|ACT39355||1),upstream_gene_variant(MODIFIER||3773||642|thrS|protein_coding|CODING|ACT39351||1),upstream_gene_variant(MODIFIER||1451||286|yniA|protein_coding|CODING|ACT39356||1),upstream_gene_variant(MODIFIER||3035||222|yniC|protein_coding|CODING|A…	.	.	NA	NA	.	.	.	.	.	.	.	.	.	.	.	.	.	.	.	.	.	.	.	.
1787065	G	A	SNP	missense_variant	MODERATE	Gct/Act	p.Ala141Thr/c.421G>A	yniC	EFF=missense_variant(MODERATE|MISSENSE|Gct/Act|p.Ala141Thr/c.421G>A|222|yniC|protein_coding|CODING|ACT39358|1|1),upstream_gene_variant(MODIFIER||411||196|ydjM|protein_coding|CODING|ACT39359||1),upstream_gene_variant(MODIFIER||1134||463|ydjN|protein_coding|CODING|ACT39360||1),upstream_gene_variant(MODIFIER||3717||252|ydiY|protein_coding|CODING|ACT39353||1),upstream_gene_variant(MODIFIER||4067||753…	157	165	COG0637	R	NO	1786645	1787313	+	G421A	-247.92	-243	5.17e-07	7.74e-08	156.14	137.85	0.5212	0.0546	419-495	0.472	0.6266	419-497	0.3673	0.897767	0.908392
1787749	G	A	SNP	missense_variant	MODERATE	Gtt/Att	p.Val92Ile/c.274G>A	ydjM	EFF=missense_variant(MODERATE|MISSENSE|Gtt/Att|p.Val92Ile/c.274G>A|196|ydjM|protein_coding|CODING|ACT39359|1|1),upstream_gene_variant(MODIFIER||450||463|ydjN|protein_coding|CODING|ACT39360||1),upstream_gene_variant(MODIFIER||4401||252|ydiY|protein_coding|CODING|ACT39353||1),upstream_gene_variant(MODIFIER||3383||753|katE|protein_coding|CODING|ACT39363||1),upstream_gene_variant(MODIFIER||1251||178|…	34	18	COG1988	R	NO	1787476	1788066	+	G274A	-215.34	-214.73	1.63e-08	3.13e-08	181.38	86.97	0.5212	0.0817	229-278	0.3493	0.5906	259-322	0.3394	0.95982	0.953928
1797789	T	C	SNP	missense_variant	MODERATE	Agc/Ggc	p.Ser231Gly/c.691A>G	celB	EFF=missense_variant(MODERATE|MISSENSE|Agc/Ggc|p.Ser231Gly/c.691A>G|452|celB|protein_coding|CODING|ACT39368|1|1),upstream_gene_variant(MODIFIER||3389||249|ydjC|protein_coding|CODING|ACT39364||1),upstream_gene_variant(MODIFIER||1934||275|nadE|protein_coding|CODING|ACT39371||1),upstream_gene_variant(MODIFIER||2024||450|celF|protein_coding|CODING|ACT39365||1),upstream_gene_variant(MODIFIER||2991||29…	4	29	COG1455	G	NO	1797121	1798479	-	A691G	-526.86	-531.61	5.69e-14	8.35e-14	285.2	282.11	0.5337	0.0785	491-540	0.3614	0.391	645-699	0.2164	0.985324	0.947417
1799047	G	A	SNP	upstream_gene_variant	MODIFIER	.	.	.	EFF=upstream_gene_variant(MODIFIER||4647||249|ydjC|protein_coding|CODING|ACT39364||1),upstream_gene_variant(MODIFIER||676||275|nadE|protein_coding|CODING|ACT39371||1),upstream_gene_variant(MODIFIER||3282||450|celF|protein_coding|CODING|ACT39365||1),upstream_gene_variant(MODIFIER||1733||295|ydjQ|protein_coding|CODING|ACT39372||1|WARNING_TRANSCRIPT_NO_START_CODON),upstream_gene_variant(MODIFIER||23…	.	.	NA	NA	.	.	.	.	.	.	.	.	.	.	.	.	.	.	.	.	.	.	.	.
1804191	GC	G	DEL	frameshift_variant	HIGH	ggc/	p.Gly445fs/c.1333delG	astB	EFF=frameshift_variant(HIGH||ggc/|p.Gly445fs/c.1333delG|447|astB|protein_coding|CODING|ACT39376|1|1),upstream_gene_variant(MODIFIER||4671||112|osmE|protein_coding|CODING|ACT39370||1),upstream_gene_variant(MODIFIER||1990||191|ydjR|protein_coding|CODING|ACT39373||1),upstream_gene_variant(MODIFIER||1302||161|spy|protein_coding|CODING|ACT39374||1),upstream_gene_variant(MODIFIER||4||322|astE|protein_c…	0	30	COG3724	E	NO	.	.	.	.	.	.	.	.	.	.	.	.	.	.	.	.	.	.	.
1806006	T	C	SNP	missense_variant	MODERATE	Act/Gct	p.Thr332Ala/c.994A>G	astD	EFF=missense_variant(MODERATE|MISSENSE|Act/Gct|p.Thr332Ala/c.994A>G|492|astD|protein_coding|CODING|ACT39377|1|1),upstream_gene_variant(MODIFIER||3804||191|ydjR|protein_coding|CODING|ACT39373||1),upstream_gene_variant(MODIFIER||3116||161|spy|protein_coding|CODING|ACT39374||1),upstream_gene_variant(MODIFIER||1818||322|astE|protein_coding|CODING|ACT39375||1),upstream_gene_variant(MODIFIER||3687||268…	0	9	COG1012	C	NO	1805521	1806999	-	A994G	-711.53	-714.76	2.87e-17	4.97e-17	374.38	367.72	0.5761	0.0541	985-1035	0.4749	0.7647	985-1035	0.4979	0.822127	0.714414
1810973	T	C	SNP	missense_variant	MODERATE	cTg/cCg	p.Leu103Pro/c.308T>C	ydjX	EFF=missense_variant(MODERATE|MISSENSE|cTg/cCg|p.Leu103Pro/c.308T>C|236|ydjX|protein_coding|CODING|ACT39381|1|1),upstream_gene_variant(MODIFIER||3974||492|astD|protein_coding|CODING|ACT39377||1),upstream_gene_variant(MODIFIER||1063||235|ydjZ|protein_coding|CODING|ACT39382||1),upstream_gene_variant(MODIFIER||1770||182|ynjA|protein_coding|CODING|ACT39383||1),upstream_gene_variant(MODIFIER||2943||34…	3	92	COG0398	S	NO	1810666	1811376	+	T308C-T362C	-217.22	-217.13	4.48e-07	4.48e-07	140.49	142.55	0.4813	0.0222	337-480	0.6521	0.7983	344-435	0.506	0.980585	0.978015
1811027	T	C	SNP	missense_variant	MODERATE	aTt/aCt	p.Ile121Thr/c.362T>C	ydjX	EFF=missense_variant(MODERATE|MISSENSE|aTt/aCt|p.Ile121Thr/c.362T>C|236|ydjX|protein_coding|CODING|ACT39381|1|1),upstream_gene_variant(MODIFIER||4028||492|astD|protein_coding|CODING|ACT39377||1),upstream_gene_variant(MODIFIER||1009||235|ydjZ|protein_coding|CODING|ACT39382||1),upstream_gene_variant(MODIFIER||1716||182|ynjA|protein_coding|CODING|ACT39383||1),upstream_gene_variant(MODIFIER||2997||34…	3	92	COG0398	S	NO	1810666	1811376	+	T308C-T362C	-217.22	-217.13	4.48e-07	4.48e-07	140.49	142.55	0.4813	0.0222	337-480	0.6521	0.7983	344-435	0.506	0.980585	0.978015
1814936	T	C	SNP	missense_variant	MODERATE	gTg/gCg	p.Val151Ala/c.452T>C	ynjC	EFF=missense_variant(MODERATE|MISSENSE|gTg/gCg|p.Val151Ala/c.452T>C|496|ynjC|protein_coding|CODING|ACT39385|1|1),upstream_gene_variant(MODIFIER||1039||217|ynjD|protein_coding|CODING|ACT39386||1),upstream_gene_variant(MODIFIER||1759||435|ynjE|protein_coding|CODING|ACT39387||1),upstream_gene_variant(MODIFIER||3782||135|nudG|protein_coding|CODING|ACT39389||1),upstream_gene_variant(MODIFIER||4663||44…	4	16	COG4135	R	NO	.	.	.	.	.	.	.	.	.	.	.	.	.	.	.	.	.	.	.
1815914	AT	A	DEL	frameshift_variant	HIGH	att/	p.Ile477fs/c.1431delT	ynjC	EFF=frameshift_variant(HIGH||att/|p.Ile477fs/c.1431delT|496|ynjC|protein_coding|CODING|ACT39385|1|1),upstream_gene_variant(MODIFIER||60||217|ynjD|protein_coding|CODING|ACT39386||1),upstream_gene_variant(MODIFIER||780||435|ynjE|protein_coding|CODING|ACT39387||1),upstream_gene_variant(MODIFIER||2803||135|nudG|protein_coding|CODING|ACT39389||1),upstream_gene_variant(MODIFIER||3684||447|gdhA|protein_…	4	16	COG4135	R	NO	.	.	.	.	.	.	.	.	.	.	.	.	.	.	.	.	.	.	.
1817315	T	C	SNP	synonymous_variant	LOW	tcT/tcC	p.Ser207Ser/c.621T>C	ynjE	EFF=synonymous_variant(LOW|SILENT|tcT/tcC|p.Ser207Ser/c.621T>C|435|ynjE|protein_coding|CODING|ACT39387|1|1),upstream_gene_variant(MODIFIER||1403||135|nudG|protein_coding|CODING|ACT39389||1),upstream_gene_variant(MODIFIER||2284||447|gdhA|protein_coding|CODING|ACT39391||1),downstream_gene_variant(MODIFIER||4572||235|ydjZ|protein_coding|CODING|ACT39382||1),downstream_gene_variant(MODIFIER||696||206|…	3	30	COG2897	P	NO	1816695	1818002	+	T621C	-518.46	-517.09	2e-14	7.02e-15	337.88	278	0.5461	0.0241	557-632	0.685	0.9319	607-657	0.7482	0.972487	0.92735
1827816	G	A	SNP	synonymous_variant	LOW	ctG/ctA	p.Leu584Leu/c.1752G>A	sppA	EFF=synonymous_variant(LOW|SILENT|ctG/ctA|p.Leu584Leu/c.1752G>A|618|sppA|protein_coding|CODING|ACT39396|1|1),upstream_gene_variant(MODIFIER||272||338|ansA|protein_coding|CODING|ACT39397||1),upstream_gene_variant(MODIFIER||1299||213|pncA|protein_coding|CODING|ACT39398||1),upstream_gene_variant(MODIFIER||3628||653|topB|protein_coding|CODING|ACT39393||1),upstream_gene_variant(MODIFIER||2580||347|sel…	82	65	COG0616	OU	NO	1826065	1827921	+	G1752A	-776.64	-777.74	8.22e-19	2.3e-18	501.19	484.29	0.5131	0.0166	1738-1787	0.7613	0.949	1738-1789	0.7924	0.982281	0.992066
1828949	G	A	SNP	missense_variant	MODERATE	Gcc/Acc	p.Ala288Thr/c.862G>A	ansA	EFF=missense_variant(MODERATE|MISSENSE|Gcc/Acc|p.Ala288Thr/c.862G>A|338|ansA|protein_coding|CODING|ACT39397|1|1),upstream_gene_variant(MODIFIER||166||213|pncA|protein_coding|CODING|ACT39398||1),upstream_gene_variant(MODIFIER||4761||653|topB|protein_coding|CODING|ACT39393||1),upstream_gene_variant(MODIFIER||3713||347|selD|protein_coding|CODING|ACT39394||1),upstream_gene_variant(MODIFIER||3045||183…	89	46	COG0252	EJ	NO	1828088	1829104	+	G862A	-381.19	-380.5	6.4e-11	3.88e-11	211.16	228.18	0.5253	0.0118	832-881	0.8106	0.9476	832-881	0.782	0.99512	0.983444
1838457	G	A	SNP	synonymous_variant	LOW	gcC/gcT	p.Ala35Ala/c.105C>T	ydjL	EFF=synonymous_variant(LOW|SILENT|gcC/gcT|p.Ala35Ala/c.105C>T|358|ydjL|protein_coding|CODING|ACT39406|1|1),upstream_gene_variant(MODIFIER||4300||315|ydjH|protein_coding|CODING|ACT39402||1),upstream_gene_variant(MODIFIER||3459||278|ydjI|protein_coding|CODING|ACT39403||1),upstream_gene_variant(MODIFIER||1543||331|gapA|protein_coding|CODING|ACT39409||1),upstream_gene_variant(MODIFIER||2395||347|ydjJ…	0	27	COG1063	ER	NO	1837485	1838561	-	C105T	-415.08	-412.72	2.02e-13	1.98e-13	234.46	237.99	0.5115	0.0025	66-204	0.9543	0.9949	90-207	0.9535	0.999995	0.999764
1839861	T	C	SNP	upstream_gene_variant	MODIFIER	.	.	.	EFF=upstream_gene_variant(MODIFIER||4863||278|ydjI|protein_coding|CODING|ACT39403||1),upstream_gene_variant(MODIFIER||139||331|gapA|protein_coding|CODING|ACT39409||1),upstream_gene_variant(MODIFIER||3799||347|ydjJ|protein_coding|CODING|ACT39404||1),upstream_gene_variant(MODIFIER||1218||294|yeaD|protein_coding|CODING|ACT39410||1),upstream_gene_variant(MODIFIER||2403||459|ydjK|protein_coding|CODING…	.	.	NA	NA	.	.	.	.	.	.	.	.	.	.	.	.	.	.	.	.	.	.	.	.
1844324	T	C	SNP	missense_variant	MODERATE	cTc/cCc	p.Leu21Pro/c.62T>C	yeaG	EFF=missense_variant(MODERATE|MISSENSE|cTc/cCc|p.Leu21Pro/c.62T>C|602|yeaG|protein_coding|CODING|ACT39413|1|1),upstream_gene_variant(MODIFIER||4666||137|yeaA|protein_coding|CODING|ACT39408||1),upstream_gene_variant(MODIFIER||1860||427|yeaH|protein_coding|CODING|ACT39414||1),upstream_gene_variant(MODIFIER||3290||491|yeaI|protein_coding|CODING|ACT39415||1),upstream_gene_variant(MODIFIER||1459||284|…	2	290	COG2766	T	NO	1844263	1846071	+	T62C-T170C	-681.45	-684.59	2.88e-18	7.95e-17	554.91	414.25	0.4973	0.1013	1962-02-01	0.2456	0.4139	1961-12-01	0.2025	0.973757	0.916381
1844432	T	C	SNP	missense_variant	MODERATE	cTg/cCg	p.Leu57Pro/c.170T>C	yeaG	EFF=missense_variant(MODERATE|MISSENSE|cTg/cCg|p.Leu57Pro/c.170T>C|602|yeaG|protein_coding|CODING|ACT39413|1|1),upstream_gene_variant(MODIFIER||4774||137|yeaA|protein_coding|CODING|ACT39408||1),upstream_gene_variant(MODIFIER||1752||427|yeaH|protein_coding|CODING|ACT39414||1),upstream_gene_variant(MODIFIER||3182||491|yeaI|protein_coding|CODING|ACT39415||1),upstream_gene_variant(MODIFIER||1567||284…	2	290	COG2766	T	NO	1844263	1846071	+	T62C-T170C	-681.45	-684.59	2.88e-18	7.95e-17	554.91	414.25	0.4973	0.1013	1962-02-01	0.2456	0.4139	1961-12-01	0.2025	0.973757	0.916381
1848741	A	G	SNP	synonymous_variant	LOW	ggA/ggG	p.Gly376Gly/c.1128A>G	yeaI	EFF=synonymous_variant(LOW|SILENT|ggA/ggG|p.Gly376Gly/c.1128A>G|491|yeaI|protein_coding|CODING|ACT39415|1|1),upstream_gene_variant(MODIFIER||529||496|yeaJ|protein_coding|CODING|ACT39416||1),upstream_gene_variant(MODIFIER||2062||167|yeaK|protein_coding|CODING|ACT39417||1),upstream_gene_variant(MODIFIER||2840||148|yeaL|protein_coding|CODING|ACT39419||1),upstream_gene_variant(MODIFIER||4161||393|yea…	0	82	COG2199	T	NO	1847614	1849089	+	A1128G	-427.3	-428.14	9.31e-19	2.38e-18	286.82	327.18	0.4314	0.1153	1101-1150	0.1872	0.8525	1096-1155	0.5815	0.964447	0.967403
1849198	G	A	SNP	upstream_gene_variant	MODIFIER	.	.	.	EFF=upstream_gene_variant(MODIFIER||72||496|yeaJ|protein_coding|CODING|ACT39416||1),upstream_gene_variant(MODIFIER||1605||167|yeaK|protein_coding|CODING|ACT39417||1),upstream_gene_variant(MODIFIER||2383||148|yeaL|protein_coding|CODING|ACT39419||1),upstream_gene_variant(MODIFIER||3704||393|yeaN|protein_coding|CODING|ACT39421||1),upstream_gene_variant(MODIFIER||4940||115|yeaO|protein_coding|CODING|…	.	.	NA	NA	.	.	.	.	.	.	.	.	.	.	.	.	.	.	.	.	.	.	.	.
1851089	C	T	SNP	missense_variant	MODERATE	cCg/cTg	p.Pro96Leu/c.287C>T	yeaK	EFF=missense_variant(MODERATE|MISSENSE|cCg/cTg|p.Pro96Leu/c.287C>T|167|yeaK|protein_coding|CODING|ACT39417|1|1),upstream_gene_variant(MODIFIER||492||148|yeaL|protein_coding|CODING|ACT39419||1),upstream_gene_variant(MODIFIER||1813||393|yeaN|protein_coding|CODING|ACT39421||1),upstream_gene_variant(MODIFIER||3049||115|yeaO|protein_coding|CODING|ACT39422||1),upstream_gene_variant(MODIFIER||3855||341|…	82	87	COG2606	S	NO	1850803	1851306	+	C287T	-181	-183.46	4.4e-06	1.16e-06	73.25	72.58	0.5137	0.1135	273-322	0.2501	0.6623	273-322	0.3971	0.964206	0.961956
1859900	G	A	SNP	missense_variant	MODERATE	aCc/aTc	p.Thr163Ile/c.488C>T	yeaT	EFF=missense_variant(MODERATE|MISSENSE|aCc/aTc|p.Thr163Ile/c.488C>T|307|yeaT|protein_coding|CODING|ACT39430|1|1),upstream_gene_variant(MODIFIER||590||361|yeaU|protein_coding|CODING|ACT39431||1),upstream_gene_variant(MODIFIER||3416||82|yeaQ|protein_coding|CODING|ACT39425||1),upstream_gene_variant(MODIFIER||1866||481|yeaV|protein_coding|CODING|ACT39432||1),upstream_gene_variant(MODIFIER||3086||60|y…	15	73	COG0583	K	NO	1859464	1860387	-	C488T	-383.95	-383.77	3.75e-12	1.51e-12	231.43	252.17	0.5062	0.1661	469-518	0.1484	0.3246	474-523	0.1849	0.987502	0.924839
1869121	C	CT	INS	upstream_gene_variant	MODIFIER	.	.	.	EFF=upstream_gene_variant(MODIFIER||2553||375|rnd|protein_coding|CODING|ACT39435||1),upstream_gene_variant(MODIFIER||2823||114|yoaB|protein_coding|CODING|ACT39440||1),upstream_gene_variant(MODIFIER||3530||119|yoaC|protein_coding|CODING|ACT39441||1),upstream_gene_variant(MODIFIER||798||561|fadD|protein_coding|CODING|ACT39436||1),upstream_gene_variant(MODIFIER||4262||453|pabB|protein_coding|CODING|…	.	.	NA	NA	.	.	.	.	.	.	.	.	.	.	.	.	.	.	.	.	.	.	.	.
1871508	C	T	SNP	synonymous_variant	LOW	ggG/ggA	p.Gly102Gly/c.306G>A	yoaA	EFF=synonymous_variant(LOW|SILENT|ggG/ggA|p.Gly102Gly/c.306G>A|636|yoaA|protein_coding|CODING|ACT39439|1|1|WARNING_TRANSCRIPT_NO_START_CODON),upstream_gene_variant(MODIFIER||4939||375|rnd|protein_coding|CODING|ACT39435||1),upstream_gene_variant(MODIFIER||437||114|yoaB|protein_coding|CODING|ACT39440||1),upstream_gene_variant(MODIFIER||1144||119|yoaC|protein_coding|CODING|ACT39441||1),upstream_gene…	24	25	COG1199	KL	NO	1869903	1871813	-	G306A	-826.14	-826.82	8.05e-22	1.14e-21	330.1	323.43	0.5686	0.0038	300-349	0.9224	0.9971	291-340	0.9612	0.999883	0.998042
1872808	A	G	SNP	missense_variant	MODERATE	Atc/Gtc	p.Ile53Val/c.157A>G	yoaC	EFF=missense_variant(MODERATE|MISSENSE|Atc/Gtc|p.Ile53Val/c.157A>G|119|yoaC|protein_coding|CODING|ACT39441|1|1),upstream_gene_variant(MODIFIER||4484||561|fadD|protein_coding|CODING|ACT39436||1),upstream_gene_variant(MODIFIER||576||453|pabB|protein_coding|CODING|ACT39443||1),upstream_gene_variant(MODIFIER||3698||193|yeaY|protein_coding|CODING|ACT39437||1),upstream_gene_variant(MODIFIER||1941||192|…	21	170	NA	NA	NO	1872652	1873011	+	A157G	-97.6	-101.64	0.000211807	0.00204182	81.78	52.44	0.4146	0.0502	128-178	0.4718	0.5902	127-191	0.3371	0.95239	0.960487
1878868	T	C	SNP	missense_variant	MODERATE	Act/Gct	p.Thr433Ala/c.1297A>G	yoaE	EFF=missense_variant(MODERATE|MISSENSE|Act/Gct|p.Thr433Ala/c.1297A>G|518|yoaE|protein_coding|CODING|ACT39447|1|1),upstream_gene_variant(MODIFIER||1759||323|manX|protein_coding|CODING|ACT39448||1|WARNING_TRANSCRIPT_NO_START_CODON),upstream_gene_variant(MODIFIER||2793||266|manY|protein_coding|CODING|ACT39449||1),upstream_gene_variant(MODIFIER||3597||286|manZ|protein_coding|CODING|ACT39450||1|WARNIN…	28	44	COG0861	P	NO	1878608	1880164	-	C1133T-A1297G	-699.91	-698.17	2.91e-18	1.76e-18	189.94	191.57	0.5699	0.0524	933-1151	0.4841	0.7647	1078-1179	0.498	0.90889	0.924495
1879032	G	A	SNP	missense_variant	MODERATE	aCc/aTc	p.Thr378Ile/c.1133C>T	yoaE	EFF=missense_variant(MODERATE|MISSENSE|aCc/aTc|p.Thr378Ile/c.1133C>T|518|yoaE|protein_coding|CODING|ACT39447|1|1),upstream_gene_variant(MODIFIER||1595||323|manX|protein_coding|CODING|ACT39448||1|WARNING_TRANSCRIPT_NO_START_CODON),upstream_gene_variant(MODIFIER||2629||266|manY|protein_coding|CODING|ACT39449||1),upstream_gene_variant(MODIFIER||3433||286|manZ|protein_coding|CODING|ACT39450||1|WARNIN…	28	44	COG0861	P	NO	1878608	1880164	-	C1133T-A1297G	-699.91	-698.17	2.91e-18	1.76e-18	189.94	191.57	0.5699	0.0524	933-1151	0.4841	0.7647	1078-1179	0.498	0.90889	0.924495
1881519	G	A	SNP	missense_variant	MODERATE	gGt/gAt	p.Gly298Asp/c.893G>A	manX	EFF=missense_variant(MODERATE|MISSENSE|gGt/gAt|p.Gly298Asp/c.893G>A|323|manX|protein_coding|CODING|ACT39448|1|1|WARNING_TRANSCRIPT_NO_START_CODON),upstream_gene_variant(MODIFIER||142||266|manY|protein_coding|CODING|ACT39449||1),upstream_gene_variant(MODIFIER||946||286|manZ|protein_coding|CODING|ACT39450||1|WARNING_TRANSCRIPT_NO_START_CODON),upstream_gene_variant(MODIFIER||1861||152|yobD|protein_c…	397	943	COG2893	G	NO	1880627	1881598	+	G893A	-385.59	-386.35	9.53e-10	9.64e-10	141.02	139.98	0.4679	0.0076	839-967	0.862	0.9787	859-925	0.8732	0.999505	0.989579
1882202	G	A	SNP	missense_variant	MODERATE	gGt/gAt	p.Gly181Asp/c.542G>A	manY	EFF=missense_variant(MODERATE|MISSENSE|gGt/gAt|p.Gly181Asp/c.542G>A|266|manY|protein_coding|CODING|ACT39449|1|1),upstream_gene_variant(MODIFIER||263||286|manZ|protein_coding|CODING|ACT39450||1|WARNING_TRANSCRIPT_NO_START_CODON),upstream_gene_variant(MODIFIER||1178||152|yobD|protein_coding|CODING|ACT39451||1),upstream_gene_variant(MODIFIER||2065||188|yebN|protein_coding|CODING|ACT39452||1),upstrea…	302	857	COG3715	G	NO	1881661	1882461	+	G542A	-329.51	-329.44	1.26e-08	6.61e-08	130.76	120.58	0.5137	0.0554	507-564	0.468	0.7121	512-561	0.4431	0.852855	0.84136
1883360	GT	G	DEL	upstream_gene_variant	MODIFIER	.	.	.	EFF=upstream_gene_variant(MODIFIER||19||152|yobD|protein_coding|CODING|ACT39451||1),upstream_gene_variant(MODIFIER||906||188|yebN|protein_coding|CODING|ACT39452||1),upstream_gene_variant(MODIFIER||3197||518|yoaE|protein_coding|CODING|ACT39447||1),upstream_gene_variant(MODIFIER||4142||79|ECB_01797|protein_coding|CODING|ACT39458||1),downstream_gene_variant(MODIFIER||4757||532|yoaD|protein_coding|CO…	.	.	NA	NA	.	.	.	.	.	.	.	.	.	.	.	.	.	.	.	.	.	.	.	.
1887501	T	C	SNP	upstream_gene_variant	MODIFIER	.	.	.	EFF=upstream_gene_variant(MODIFIER||2||79|ECB_01797|protein_coding|CODING|ACT39458||1),upstream_gene_variant(MODIFIER||1352||457|yebQ|protein_coding|CODING|ACT39460||1),upstream_gene_variant(MODIFIER||1862||269|rrmA|protein_coding|CODING|ACT39453||1),upstream_gene_variant(MODIFIER||1487||69|cspC|protein_coding|CODING|ACT39454||1),upstream_gene_variant(MODIFIER||1331||47|yobF|protein_coding|CODING…	.	.	NA	NA	.	.	.	.	.	.	.	.	.	.	.	.	.	.	.	.	.	.	.	.
1887654	T	C	SNP	missense_variant	MODERATE	gTa/gCa	p.Val51Ala/c.152T>C	ECB_01797	EFF=missense_variant(MODERATE|MISSENSE|gTa/gCa|p.Val51Ala/c.152T>C|79|ECB_01797|protein_coding|CODING|ACT39458|1|1),upstream_gene_variant(MODIFIER||1199||457|yebQ|protein_coding|CODING|ACT39460||1),upstream_gene_variant(MODIFIER||2015||269|rrmA|protein_coding|CODING|ACT39453||1),upstream_gene_variant(MODIFIER||1640||69|cspC|protein_coding|CODING|ACT39454||1),upstream_gene_variant(MODIFIER||1484||…	NA	NA	NA	NA	NO	1887503	1887742	+	T152C	-77.05	-77.62	0.00511149	0.00202808	60.19	32.31	0.4333	0.037	149-235	0.5434	0.7913	150-217	0.5127	0.940363	0.647257
1889783	A	G	SNP	missense_variant	MODERATE	Aca/Gca	p.Thr311Ala/c.931A>G	yebQ	EFF=missense_variant(MODERATE|MISSENSE|Aca/Gca|p.Thr311Ala/c.931A>G|457|yebQ|protein_coding|CODING|ACT39460|1|1),upstream_gene_variant(MODIFIER||4144||269|rrmA|protein_coding|CODING|ACT39453||1),upstream_gene_variant(MODIFIER||3769||69|cspC|protein_coding|CODING|ACT39454||1),upstream_gene_variant(MODIFIER||3613||47|yobF|protein_coding|CODING|ACT39455||1),upstream_gene_variant(MODIFIER||2657||95|y…	4	25	COG0477	GEPR	NO	1888853	1890226	+	A931G	-539.24	-542.23	4.45e-16	4.47e-16	395.56	361.08	0.5087	0.0057	917-976	0.8928	0.9814	788-930	0.8828	0.879282	0.863895
1895216	G	GCC	INS	frameshift_variant	HIGH	gcc/gCCcc	p.Ala128_Pro129fs/c.383_384insCC	yebS	EFF=frameshift_variant(HIGH||gcc/gCCcc|p.Ala128_Pro129fs/c.383_384insCC|427|yebS|protein_coding|CODING|ACT39465|1|1),upstream_gene_variant(MODIFIER||870||877|yebT|protein_coding|CODING|ACT39466||1),upstream_gene_variant(MODIFIER||4064||293|htpX|protein_coding|CODING|ACT39461||1),upstream_gene_variant(MODIFIER||1824||682|prc|protein_coding|CODING|ACT39462||1),upstream_gene_variant(MODIFIER||3583||…	33	44	COG2995	S	NO	.	.	.	.	.	.	.	.	.	.	.	.	.	.	.	.	.	.	.
1900146	G	A	SNP	synonymous_variant	LOW	ccG/ccA	p.Pro449Pro/c.1347G>A	yebU	EFF=synonymous_variant(LOW|SILENT|ccG/ccA|p.Pro449Pro/c.1347G>A|479|yebU|protein_coding|CODING|ACT39467|1|1|WARNING_TRANSCRIPT_NO_START_CODON),upstream_gene_variant(MODIFIER||211||78|yebV|protein_coding|CODING|ACT39468||1),upstream_gene_variant(MODIFIER||552||63|yebW|protein_coding|CODING|ACT39469||1),upstream_gene_variant(MODIFIER||3538||76|holE|protein_coding|CODING|ACT39474||1),upstream_gene_v…	81	32	COG0144	J	NO	1898800	1900239	+	G1347A	-563.81	-563.96	5.88e-17	8.24e-17	164.85	150.88	0.5306	0.0119	1340-1389	0.8072	0.9843	1343-1392	0.8884	0.998113	0.986433
1903600	T	C	SNP	upstream_gene_variant	MODIFIER	.	.	.	EFF=upstream_gene_variant(MODIFIER||84||76|holE|protein_coding|CODING|ACT39474||1),upstream_gene_variant(MODIFIER||416||218|yobB|protein_coding|CODING|ACT39475||1),upstream_gene_variant(MODIFIER||1096||220|exoX|protein_coding|CODING|ACT39476||1),upstream_gene_variant(MODIFIER||2054||218|pphA|protein_coding|CODING|ACT39470||1),upstream_gene_variant(MODIFIER||1318||113|yebY|protein_coding|CODING|AC…	.	.	NA	NA	.	.	.	.	.	.	.	.	.	.	.	.	.	.	.	.	.	.	.	.
1906052	T	C	SNP	missense_variant	MODERATE	tAc/tGc	p.Tyr455Cys/c.1364A>G	ptrB	EFF=missense_variant(MODERATE|MISSENSE|tAc/tGc|p.Tyr455Cys/c.1364A>G|686|ptrB|protein_coding|CODING|ACT39477|1|1),upstream_gene_variant(MODIFIER||4506||218|pphA|protein_coding|CODING|ACT39470||1),upstream_gene_variant(MODIFIER||3770||113|yebY|protein_coding|CODING|ACT39471||1),upstream_gene_variant(MODIFIER||2885||290|yebZ|protein_coding|CODING|ACT39472||1),upstream_gene_variant(MODIFIER||2507||1…	11	47	COG1770	E	NO	1905355	1907415	-	A1364G	-815.46	-817.89	1.96e-20	1.48e-20	319.32	396.77	0.4713	0.2573	1359-1408	0.0384	-0.0235	1369-1423	0.0548	0.899356	0.813629
1909761	T	C	SNP	missense_variant	MODERATE	gTc/gCc	p.Val102Ala/c.305T>C	purT	EFF=missense_variant(MODERATE|MISSENSE|gTc/gCc|p.Val102Ala/c.305T>C|392|purT|protein_coding|CODING|ACT39481|1|1),upstream_gene_variant(MODIFIER||2346||686|ptrB|protein_coding|CODING|ACT39477||1),upstream_gene_variant(MODIFIER||1478||219|yebE|protein_coding|CODING|ACT39478||1),upstream_gene_variant(MODIFIER||783||122|yebF|protein_coding|CODING|ACT39479||1),upstream_gene_variant(MODIFIER||438||96|y…	9	85	COG0027	F	NO	1909457	1910635	+	T305C-T348C	-508.4	-510.52	1.24e-12	1.07e-12	219.58	210.63	0.536	0.1653	434-488	0.1496	0.2361	434-526	0.1487	0.996838	0.950809
1909804	T	C	SNP	synonymous_variant	LOW	ggT/ggC	p.Gly116Gly/c.348T>C	purT	EFF=synonymous_variant(LOW|SILENT|ggT/ggC|p.Gly116Gly/c.348T>C|392|purT|protein_coding|CODING|ACT39481|1|1),upstream_gene_variant(MODIFIER||2389||686|ptrB|protein_coding|CODING|ACT39477||1),upstream_gene_variant(MODIFIER||1521||219|yebE|protein_coding|CODING|ACT39478||1),upstream_gene_variant(MODIFIER||826||122|yebF|protein_coding|CODING|ACT39479||1),upstream_gene_variant(MODIFIER||481||96|yebG|p…	9	85	COG0027	F	NO	1909457	1910635	+	T305C-T348C	-508.4	-510.52	1.24e-12	1.07e-12	219.58	210.63	0.536	0.1653	434-488	0.1496	0.2361	434-526	0.1487	0.996838	0.950809
1912688	C	T	SNP	missense_variant	MODERATE	Gcc/Acc	p.Ala165Thr/c.493G>A	edd	EFF=missense_variant(MODERATE|MISSENSE|Gcc/Acc|p.Ala165Thr/c.493G>A|603|edd|protein_coding|CODING|ACT39483|1|1),upstream_gene_variant(MODIFIER||4405||219|yebE|protein_coding|CODING|ACT39478||1),upstream_gene_variant(MODIFIER||3710||122|yebF|protein_coding|CODING|ACT39479||1),upstream_gene_variant(MODIFIER||3365||96|yebG|protein_coding|CODING|ACT39480||1),upstream_gene_variant(MODIFIER||2540||289|…	90	43	COG3147	S	NO	1911369	1913180	-	A138G-G493A	-758.81	-758.29	3.18e-21	3.06e-21	310.95	322.31	0.5296	0.0549	481-631	0.4698	0.8528	488-624	0.6042	0.719994	0.53223
1913043	T	C	SNP	synonymous_variant	LOW	gcA/gcG	p.Ala46Ala/c.138A>G	edd	EFF=synonymous_variant(LOW|SILENT|gcA/gcG|p.Ala46Ala/c.138A>G|603|edd|protein_coding|CODING|ACT39483|1|1),upstream_gene_variant(MODIFIER||4760||219|yebE|protein_coding|CODING|ACT39478||1),upstream_gene_variant(MODIFIER||4065||122|yebF|protein_coding|CODING|ACT39479||1),upstream_gene_variant(MODIFIER||3720||96|yebG|protein_coding|CODING|ACT39480||1),upstream_gene_variant(MODIFIER||2185||289|yebK|p…	90	43	COG3147	S	NO	1911369	1913180	-	A138G-G493A	-758.81	-758.29	3.18e-21	3.06e-21	310.95	322.31	0.5296	0.0549	481-631	0.4698	0.8528	488-624	0.6042	0.719994	0.53223
1914131	C	T	SNP	missense_variant	MODERATE	Gac/Aac	p.Asp254Asn/c.760G>A	zwf	EFF=missense_variant(MODERATE|MISSENSE|Gac/Aac|p.Asp254Asn/c.760G>A|491|zwf|protein_coding|CODING|ACT39484|1|1),upstream_gene_variant(MODIFIER||4808||96|yebG|protein_coding|CODING|ACT39480||1),upstream_gene_variant(MODIFIER||1097||289|yebK|protein_coding|CODING|ACT39485||1),upstream_gene_variant(MODIFIER||2094||480|pykA|protein_coding|CODING|ACT39486||1),upstream_gene_variant(MODIFIER||2799||213|…	NA	NA	COG0364	G	NO	1913415	1914890	-	A234G-G760A	-587.22	-587.22	7.16e-15	7.02e-15	283.4	288.56	0.521	0.0153	430-774	0.7723	0.9476	460-612	0.7838	0.989629	0.971475
1914657	T	C	SNP	synonymous_variant	LOW	ttA/ttG	p.Leu78Leu/c.234A>G	zwf	EFF=synonymous_variant(LOW|SILENT|ttA/ttG|p.Leu78Leu/c.234A>G|491|zwf|protein_coding|CODING|ACT39484|1|1),upstream_gene_variant(MODIFIER||571||289|yebK|protein_coding|CODING|ACT39485||1),upstream_gene_variant(MODIFIER||1568||480|pykA|protein_coding|CODING|ACT39486||1),upstream_gene_variant(MODIFIER||3325||213|eda|protein_coding|CODING|ACT39482||1),upstream_gene_variant(MODIFIER||1477||603|edd|pro…	NA	NA	COG0364	G	NO	1913415	1914890	-	A234G-G760A	-587.22	-587.22	7.16e-15	7.02e-15	283.4	288.56	0.521	0.0153	430-774	0.7723	0.9476	460-612	0.7838	0.989629	0.971475
1915610	C	CA	INS	frameshift_variant	HIGH	gca/gcAa	p.Ala128_Lys129fs/c.384_385insA	yebK	EFF=frameshift_variant(HIGH||gca/gcAa|p.Ala128_Lys129fs/c.384_385insA|289|yebK|protein_coding|CODING|ACT39485|1|1),upstream_gene_variant(MODIFIER||614||480|pykA|protein_coding|CODING|ACT39486||1),upstream_gene_variant(MODIFIER||4279||213|eda|protein_coding|CODING|ACT39482||1),upstream_gene_variant(MODIFIER||2431||603|edd|protein_coding|CODING|ACT39483||1),upstream_gene_variant(MODIFIER||721||491|…	61	152	COG1737	K	NO	.	.	.	.	.	.	.	.	.	.	.	.	.	.	.	.	.	.	.
1916454	G	A	SNP	missense_variant	MODERATE	cGt/cAt	p.Arg77His/c.230G>A	pykA	EFF=missense_variant(MODERATE|MISSENSE|cGt/cAt|p.Arg77His/c.230G>A|480|pykA|protein_coding|CODING|ACT39486|1|1),upstream_gene_variant(MODIFIER||3274||603|edd|protein_coding|CODING|ACT39483||1),upstream_gene_variant(MODIFIER||1564||491|zwf|protein_coding|CODING|ACT39484||1),upstream_gene_variant(MODIFIER||4784||251|znuC|protein_coding|CODING|ACT39490||1),downstream_gene_variant(MODIFIER||1344||323…	85	151	COG0469	G	NO	1916225	1917667	+	G230A	-605.1	-605.1	2.4e-16	1.37e-16	305.1	305.57	0.5062	0.0847	149-233	0.3381	0.5382	112-193	0.3022	0.989512	0.966081
1926273	T	C	SNP	missense_variant	MODERATE	Atg/Gtg	p.Met217Val/c.649A>G	yebC	EFF=missense_variant(MODERATE|MISSENSE|Atg/Gtg|p.Met217Val/c.649A>G|246|yebC|protein_coding|CODING|ACT39496|1|1),upstream_gene_variant(MODIFIER||2147||336|ruvB|protein_coding|CODING|ACT39492||1),upstream_gene_variant(MODIFIER||3329||188|yecD|protein_coding|CODING|ACT39499||1),upstream_gene_variant(MODIFIER||1527||203|ruvA|protein_coding|CODING|ACT39493||1|WARNING_TRANSCRIPT_NO_START_CODON),upstre…	1231	298	COG0217	S	NO	1926181	1926921	-	T216C-A649G	-285.63	-287.74	5.78e-11	7.58e-11	124.88	128.16	0.5193	0.0204	617-666	0.7198	0.8813	616-667	0.6542	0.988103	0.996668
1926706	A	G	SNP	synonymous_variant	LOW	cgT/cgC	p.Arg72Arg/c.216T>C	yebC	EFF=synonymous_variant(LOW|SILENT|cgT/cgC|p.Arg72Arg/c.216T>C|246|yebC|protein_coding|CODING|ACT39496|1|1),upstream_gene_variant(MODIFIER||2580||336|ruvB|protein_coding|CODING|ACT39492||1),upstream_gene_variant(MODIFIER||2896||188|yecD|protein_coding|CODING|ACT39499||1),upstream_gene_variant(MODIFIER||1960||203|ruvA|protein_coding|CODING|ACT39493||1|WARNING_TRANSCRIPT_NO_START_CODON),upstream_gen…	1231	298	COG0217	S	NO	1926181	1926921	-	T216C-A649G	-285.63	-287.74	5.78e-11	7.58e-11	124.88	128.16	0.5193	0.0204	617-666	0.7198	0.8813	616-667	0.6542	0.988103	0.996668
1927401	A	G	SNP	missense_variant	MODERATE	gTg/gCg	p.Val1Ala/c.2T>C	ntpA	EFF=missense_variant(MODERATE|MISSENSE|gTg/gCg|p.Val1Ala/c.2T>C|150|ntpA|protein_coding|CODING|ACT39497|1|1|WARNING_TRANSCRIPT_NO_START_CODON),upstream_gene_variant(MODIFIER||3275||336|ruvB|protein_coding|CODING|ACT39492||1),upstream_gene_variant(MODIFIER||2201||188|yecD|protein_coding|CODING|ACT39499||1),upstream_gene_variant(MODIFIER||2655||203|ruvA|protein_coding|CODING|ACT39493||1|WARNING_TRA…	456	105	COG0494	LR	NO	1926950	1927402	-	T2C	-199.53	-201.35	8.39e-06	1.48e-05	80.94	62.32	0.5396	0.0142	1-201	0.5139	0.8941	152-201	0.421	0.994927	0.937628
1929817	G	A	SNP	synonymous_variant	LOW	gcG/gcA	p.Ala72Ala/c.216G>A	yecD	EFF=synonymous_variant(LOW|SILENT|gcG/gcA|p.Ala72Ala/c.216G>A|188|yecD|protein_coding|CODING|ACT39499|1|1),upstream_gene_variant(MODIFIER||348||272|yecE|protein_coding|CODING|ACT39500||1),upstream_gene_variant(MODIFIER||1219||131|yecN|protein_coding|CODING|ACT39501||1),upstream_gene_variant(MODIFIER||3671||173|ruvC|protein_coding|CODING|ACT39495||1),upstream_gene_variant(MODIFIER||1655||247|yecO|…	68	76	COG1335	Q	NO	1929602	1930168	+	G216A	-226.07	-223.05	7.01e-07	3.55e-06	109.79	188.01	0.5312	0.2533	159-219	0.0661	-0.0503	143-203	0.0668	0.862081	0.744378
1931126	G	A	SNP	missense_variant	MODERATE	Gcc/Acc	p.Ala31Thr/c.91G>A	yecN	EFF=missense_variant(MODERATE|MISSENSE|Gcc/Acc|p.Ala31Thr/c.91G>A|131|yecN|protein_coding|CODING|ACT39501|1|1),upstream_gene_variant(MODIFIER||4980||173|ruvC|protein_coding|CODING|ACT39495||1),upstream_gene_variant(MODIFIER||346||247|yecO|protein_coding|CODING|ACT39502||1),upstream_gene_variant(MODIFIER||4205||246|yebC|protein_coding|CODING|ACT39496||1),upstream_gene_variant(MODIFIER||1086||323|y…	126	174	COG3788	R	NO	1931036	1931431	+	G91A	-169.09	-167.61	1.35e-05	7.73e-06	119.47	136.16	0.4742	0.315	60-122	0.0259	-0.3784	73-123	0.0135	0.828683	0.683038
1943000	T	A	SNP	missense_variant	MODERATE	gAt/gTt	p.Asp274Val/c.821A>T	flhA	EFF=missense_variant(MODERATE|MISSENSE|gAt/gTt|p.Asp274Val/c.821A>T|692|flhA|protein_coding|CODING|ACT39511|1|1),upstream_gene_variant(MODIFIER||4384||188|yecM|protein_coding|CODING|ACT39507||1),upstream_gene_variant(MODIFIER||1282||122|flhE|protein_coding|CODING|ACT39510||1),downstream_gene_variant(MODIFIER||813||382|flhB|protein_coding|CODING|ACT39512||1|WARNING_TRANSCRIPT_NO_START_CODON),downs…	2	28	COG1298	NU	NO	1941742	1943820	-	A821T	-911.18	-911.18	7.87e-21	7.88e-21	590.18	590.03	0.5786	0	797-847	1	1	721-779	0.9995	1	1
1945524	T	C	SNP	missense_variant	MODERATE	gAt/gGt	p.Asp95Gly/c.284A>G	cheZ	EFF=missense_variant(MODERATE|MISSENSE|gAt/gGt|p.Asp95Gly/c.284A>G|214|cheZ|protein_coding|CODING|ACT39513|1|1),upstream_gene_variant(MODIFIER||3806||122|flhE|protein_coding|CODING|ACT39510||1),upstream_gene_variant(MODIFIER||1704||692|flhA|protein_coding|CODING|ACT39511||1),upstream_gene_variant(MODIFIER||563||382|flhB|protein_coding|CODING|ACT39512||1|WARNING_TRANSCRIPT_NO_START_CODON),downstre…	1	31	COG3143	NT	NO	1945163	1945807	-	A284G	-273.9	-274.16	9.45e-07	1.13e-06	141.96	179.31	0.5536	0.0052	249-298	0.9014	0.9766	251-300	0.8657	0.993025	0.99273
1946471	G	A	SNP	synonymous_variant	LOW	gtC/gtT	p.Val267Val/c.801C>T	cheB	EFF=synonymous_variant(LOW|SILENT|gtC/gtT|p.Val267Val/c.801C>T|349|cheB|protein_coding|CODING|ACT39515|1|1),upstream_gene_variant(MODIFIER||4753||122|flhE|protein_coding|CODING|ACT39510||1),upstream_gene_variant(MODIFIER||2651||692|flhA|protein_coding|CODING|ACT39511||1),upstream_gene_variant(MODIFIER||1510||382|flhB|protein_coding|CODING|ACT39512||1|WARNING_TRANSCRIPT_NO_START_CODON),upstream_ge…	0	18	COG2201	NT	NO	1946222	1947271	-	A502G-T521C-C801T	-462.04	-462	4.44e-11	3.52e-11	221.74	231.42	0.55	0.1338	816-865	0.2036	0.133	816-865	0.1137	0.996536	0.976694
1946751	A	G	SNP	missense_variant	MODERATE	gTa/gCa	p.Val174Ala/c.521T>C	cheB	EFF=missense_variant(MODERATE|MISSENSE|gTa/gCa|p.Val174Ala/c.521T>C|349|cheB|protein_coding|CODING|ACT39515|1|1),upstream_gene_variant(MODIFIER||2931||692|flhA|protein_coding|CODING|ACT39511||1),upstream_gene_variant(MODIFIER||1790||382|flhB|protein_coding|CODING|ACT39512||1|WARNING_TRANSCRIPT_NO_START_CODON),upstream_gene_variant(MODIFIER||944||214|cheZ|protein_coding|CODING|ACT39513||1),upstrea…	0	18	COG2201	NT	NO	1946222	1947271	-	A502G-T521C-C801T	-462.04	-462	4.44e-11	3.52e-11	221.74	231.42	0.55	0.1338	816-865	0.2036	0.133	816-865	0.1137	0.996536	0.976694
1946770	T	C	SNP	missense_variant	MODERATE	Act/Gct	p.Thr168Ala/c.502A>G	cheB	EFF=missense_variant(MODERATE|MISSENSE|Act/Gct|p.Thr168Ala/c.502A>G|349|cheB|protein_coding|CODING|ACT39515|1|1),upstream_gene_variant(MODIFIER||2950||692|flhA|protein_coding|CODING|ACT39511||1),upstream_gene_variant(MODIFIER||1809||382|flhB|protein_coding|CODING|ACT39512||1|WARNING_TRANSCRIPT_NO_START_CODON),upstream_gene_variant(MODIFIER||963||214|cheZ|protein_coding|CODING|ACT39513||1),upstrea…	0	18	COG2201	NT	NO	1946222	1947271	-	A502G-T521C-C801T	-462.04	-462	4.44e-11	3.52e-11	221.74	231.42	0.55	0.1338	816-865	0.2036	0.133	816-865	0.1137	0.996536	0.976694
1947565	T	C	SNP	synonymous_variant	LOW	ggA/ggG	p.Gly190Gly/c.570A>G	cheR	EFF=synonymous_variant(LOW|SILENT|ggA/ggG|p.Gly190Gly/c.570A>G|286|cheR|protein_coding|CODING|ACT39516|1|1),upstream_gene_variant(MODIFIER||3745||692|flhA|protein_coding|CODING|ACT39511||1),upstream_gene_variant(MODIFIER||2604||382|flhB|protein_coding|CODING|ACT39512||1|WARNING_TRANSCRIPT_NO_START_CODON),upstream_gene_variant(MODIFIER||1758||214|cheZ|protein_coding|CODING|ACT39513||1),upstream_ge…	0	28	COG1352	NT	NO	1947274	1948134	-	A570G	-356.01	-355.46	7.33e-11	3.36e-11	255.71	277.92	0.5461	0.0001	537-586	0.9978	0.9998	537-588	0.9933	0.997097	0.979861
1948270	T	C	SNP	synonymous_variant	LOW	gaA/gaG	p.Glu495Glu/c.1485A>G	tap	EFF=synonymous_variant(LOW|SILENT|gaA/gaG|p.Glu495Glu/c.1485A>G|533|tap|protein_coding|CODING|ACT39517|1|1),upstream_gene_variant(MODIFIER||4450||692|flhA|protein_coding|CODING|ACT39511||1),upstream_gene_variant(MODIFIER||3309||382|flhB|protein_coding|CODING|ACT39512||1|WARNING_TRANSCRIPT_NO_START_CODON),upstream_gene_variant(MODIFIER||2463||214|cheZ|protein_coding|CODING|ACT39513||1),upstream_ge…	0	35	COG0840	NT	NO	1948153	1949754	-	A1485G	-667.58	-669.1	3e-15	2.76e-14	184.39	215.84	0.5377	0.0484	1439-1495	0.5082	0.8153	1436-1498	0.5441	0.992768	0.982349
1950434	T	C	SNP	missense_variant	MODERATE	gAt/gGt	p.Asp343Gly/c.1028A>G	tar	EFF=missense_variant(MODERATE|MISSENSE|gAt/gGt|p.Asp343Gly/c.1028A>G|553|tar|protein_coding|CODING|ACT39518|1|1),upstream_gene_variant(MODIFIER||4627||214|cheZ|protein_coding|CODING|ACT39513||1),upstream_gene_variant(MODIFIER||4227||129|cheY|protein_coding|CODING|ACT39514||1),upstream_gene_variant(MODIFIER||3163||349|cheB|protein_coding|CODING|ACT39515||1),upstream_gene_variant(MODIFIER||2300||28…	0	35	COG0840	NT	NO	1949800	1951461	-	C1014T-A1028G	-658.06	-656.47	1.18e-18	1.11e-18	617.95	600.99	0.5904	0.4065	990-1039	0.0176	0.0485	968-1026	0.0898	0.962551	0.970939
1950448	G	A	SNP	synonymous_variant	LOW	ggC/ggT	p.Gly338Gly/c.1014C>T	tar	EFF=synonymous_variant(LOW|SILENT|ggC/ggT|p.Gly338Gly/c.1014C>T|553|tar|protein_coding|CODING|ACT39518|1|1),upstream_gene_variant(MODIFIER||4641||214|cheZ|protein_coding|CODING|ACT39513||1),upstream_gene_variant(MODIFIER||4241||129|cheY|protein_coding|CODING|ACT39514||1),upstream_gene_variant(MODIFIER||3177||349|cheB|protein_coding|CODING|ACT39515||1),upstream_gene_variant(MODIFIER||2314||286|che…	0	35	COG0840	NT	NO	1949800	1951461	-	C1014T-A1028G	-658.06	-656.47	1.18e-18	1.11e-18	617.95	600.99	0.5904	0.4065	990-1039	0.0176	0.0485	968-1026	0.0898	0.962551	0.970939
1954374	C	T	SNP	missense_variant	MODERATE	Gcc/Acc	p.Ala218Thr/c.652G>A	motB	EFF=missense_variant(MODERATE|MISSENSE|Gcc/Acc|p.Ala218Thr/c.652G>A|308|motB|protein_coding|CODING|ACT39521|1|1),upstream_gene_variant(MODIFIER||4620||533|tap|protein_coding|CODING|ACT39517||1),upstream_gene_variant(MODIFIER||2913||553|tar|protein_coding|CODING|ACT39518||1),upstream_gene_variant(MODIFIER||2265||167|cheW|protein_coding|CODING|ACT39519||1),upstream_gene_variant(MODIFIER||3373||142|…	1	27	COG1360	N	NO	1954099	1955025	-	G652A	-351.33	-350.66	3.37e-11	8.12e-11	146	130.63	0.5486	0.0991	534-660	0.2901	0.7305	535-658	0.4615	0.965364	0.966773
1955285	T	C	SNP	missense_variant	MODERATE	Act/Gct	p.Thr209Ala/c.625A>G	motA	EFF=missense_variant(MODERATE|MISSENSE|Act/Gct|p.Thr209Ala/c.625A>G|295|motA|protein_coding|CODING|ACT39522|1|1|WARNING_TRANSCRIPT_NO_START_CODON),upstream_gene_variant(MODIFIER||3824||553|tar|protein_coding|CODING|ACT39518||1),upstream_gene_variant(MODIFIER||3176||167|cheW|protein_coding|CODING|ACT39519||1),upstream_gene_variant(MODIFIER||2462||142|yecG|protein_coding|CODING|ACT39525||1),upstrea…	0	25	COG1291	N	NO	1955022	1955909	-	A625G	-360.66	-361	2.08e-09	2.38e-09	202.52	193.47	0.5287	0.0164	468-669	0.7605	0.8824	580-633	0.6559	0.998902	0.992106
1958328	G	A	SNP	missense_variant	MODERATE	Cgt/Tgt	p.Arg427Cys/c.1279C>T	otsA	EFF=missense_variant(MODERATE|MISSENSE|Cgt/Tgt|p.Arg427Cys/c.1279C>T|474|otsA|protein_coding|CODING|ACT39526|1|1),upstream_gene_variant(MODIFIER||4234||654|cheA|protein_coding|CODING|ACT39520||1|WARNING_TRANSCRIPT_NO_START_CODON),upstream_gene_variant(MODIFIER||3303||308|motB|protein_coding|CODING|ACT39521||1),upstream_gene_variant(MODIFIER||2419||295|motA|protein_coding|CODING|ACT39522||1|WARNIN…	8	173	COG0380	G	NO	1958182	1959606	-	A105G-C1279T	-549.18	-551.29	1.02e-15	8.26e-17	279.33	277.19	0.4919	0.2044	95-269	0.0838	0.3801	98-243	0.1988	0.749433
[truncated: 814 more rows]
