# Supplementary material for: RNA chaperones buffer deleterious mutations in E. coli
Source: eLife. 2015 Mar 25;4:e04745. doi: 10.7554/eLife.04745 (PMC4402597; doi:10.7554/eLife.04745)
Supplement: Supplementary file 3. — Mutation in the evolved ΔmutH strain. DOI: http://dx.doi.org/10.7554/eLife.04745.018 [file elife04745s003.xlsx]

## Sheet: dH02.eff_annot4.vcf
Supplementary file 3 - Mutations in the evolved ΔmutH strain compared to the reference MG1655 genome
Variant_location: in relation to the MG1655 reference genome NC_000913.3)
Variant_type: SNP (Single nucleotide polymorphism), INS (insertion)
Variant_effect: as annotated by SnpEff v4.0 (http://snpeff.sourceforge.net/)
Predicted_impact: as categorized by SnpEff v4.0
Context: old codon context/new context for variants in coding sequence.
AA_change: The amino acid/nucleotide change and position within the protein/coding sequence
Gene: for variants in coding sequence, the gene affected
SNP_effect_string: full SnpEff-generated effect annotation. See SnpEff documentation
Expression_LB: Upper-quartile-normalized expression level of the gene in LB medium as computed by the Rockhopper software (http://cs.wellesley.edu/~btjaden/Rockhopper/index.html) across 3 biological replicates [NCBI Sequence Read Archive IDs: SRR794833, SRR794834, SRR794834]
Expression_Minimal: Upper-quartile-normalized expression level of the gene in minimal MOPS medium as computed by the Rockhopper software (http://cs.wellesley.edu/~btjaden/Rockhopper/index.html) across 3 biological replicates [NCBI Sequence Read Archive IDs: SRR794863, SRR794864, SRR794865]
COG(_class): the Cluster of Orthologous Group affiliation for proteins
Essential: Is the gene essential? (according to list compiled from multiple primary publications, available at http://ecoliwiki.net/colipedia/index.php/Essential_genes)
SNPs_in_gene: Summary of all variants present in the focal gene
MFE_reference(alt): Minimum free energies of WT (SNP-affected) RNA secondary structures as computed by RNAfold
MFE_freq_reference(alt): The frequency of the MFE structure in the ensembl of structures
Ensemble_diversity_reference(alt): The ensemble diversity computed by RNAfold
Dmax: Maximum local structural dissimilarity (WT versus SNP-affected structure) computed by RNAsnp
Dmax_interval: the RNA region where Dmax is found
Dmax_pval: Estimated significance of structural effect based on comparison to background distribution. See RNAsnp documentation for details
Rmin: Minimum local structural correlation (WT versus SNP-affected structure) computed by RNAsnp
Rmin_interval: the RNA region where Rmin is found
Rmin_pval: Estimated significance of structural effect based on comparison to background distribution. See RNAsnp documentation for details
Base_pairing_probability: Correlation of base pairing probabilities computed by SNPfold (http://ribosnitch.bio.unc.edu/snpfold/SNPfold.html)
Shannon_corr: Shannon correlation computed by SNPfold (http://ribosnitch.bio.unc.edu/snpfold/SNPfold.html)
RNA secondary structure and mutational effects were predicted based on coding regions of the respective genes. While mutations are listed individually, RNA secondary structures were determined using all mutations present in the relevant coding sequence.
Variant_location	Reference_allele	Variant_allele	Variant_type	Variant_effect	Predicted_impact	Context	AA_change	Gene	SNP_effect_string	Expression_LB	Expression_Minimal	COG	COG_class	Essential	Gene_start	Gene_end	Strand	SNPs_in_gene	MFE_reference	MFE_alt	MFE_freq_reference	MFE_freq_alt	Ensemble_diversity_reference	Ensemble_diversity_alt	CDS_GC_content	Dmax	Dmax_interval	Dmax_pval	Rmin	Rmin_interval	Rmin_pval	Base_pairing_probability	Shannon_corr
60677	C	T	SNP	missense_variant	MODERATE	cGc/cAc	p.Arg863His/c.2588G>A	rapA (hepA)	EFF=missense_variant(MODERATE|MISSENSE|cGc/cAc|p.Arg863His/c.2588G>A|968|rapA|protein_coding|CODING|AAC73170|1|1),upstream_gene_variant(MODIFIER||3568||784|lptD|protein_coding|CODING|AAC73165||1),upstream_gene_variant(MODIFIER||331||219|rluA|protein_coding|CODING|AAC73169||1),downstream_gene_variant(MODIFIER||2498||271|djlA|protein_coding|CODING|AAC73166||1),downstream_gene_variant(MODIFIER||2752…	291	56	COG0553	KL	NO	60358	63264	-	G2588A	-1246.17	-1246.69	1.43176e-25	2.65049e-25	957.67	916.32	0.5411	0.0179	2461-2609	0.7447	0.9765	2468-2605	0.8654	0.993631	0.953121
316599	A	G	SNP	upstream_gene_variant	MODIFIER	.	.	.	EFF=upstream_gene_variant(MODIFIER||840|||ykgQ|pseudogene|NON_CODING|b4631||1),upstream_gene_variant(MODIFIER||4085||46|ykgO|protein_coding|CODING|ABD18636||1),upstream_gene_variant(MODIFIER||3822||87|ykgM|protein_coding|CODING|AAC73399||1),upstream_gene_variant(MODIFIER||3357||33|ykgR|protein_coding|CODING|ACO59990||1),upstream_gene_variant(MODIFIER||2794|||ykgP|pseudogene|NON_CODING|b4630||1),u…	.	.	NA	NA	.	.	.	.	.	.	.	.	.	.	.	.	.	.	.	.	.	.	.	.
380012	AGGGGGGGGGG	AGGGGGGGG,AGGGGGGGGG	INS	upstream_gene_variant	MODIFIER	.	.	.	EFF=upstream_gene_variant(MODIFIER||1330||121|insC1|protein_coding|CODING|AAC73463||1),upstream_gene_variant(MODIFIER||1329||121|insC1|protein_coding|CODING|AAC73463||2),upstream_gene_variant(MODIFIER||1653||301|insD1|protein_coding|CODING|AAC73464||1|WARNING_TRANSCRIPT_NO_START_CODON),upstream_gene_variant(MODIFIER||1652||301|insD1|protein_coding|CODING|AAC73464||2|WARNING_TRANSCRIPT_NO_START_CO…	.	.	NA	NA	.	.	.	.	.	.	.	.	.	.	.	.	.	.	.	.	.	.	.	.
451346	C	T	SNP	missense_variant	MODERATE	Gaa/Aaa	p.Glu89Lys/c.265G>A	cyoA	EFF=missense_variant(MODERATE|MISSENSE|Gaa/Aaa|p.Glu89Lys/c.265G>A|315|cyoA|protein_coding|CODING|AAC73535|1|1),upstream_gene_variant(MODIFIER||4680||454|yajR|protein_coding|CODING|AAC73530||1),upstream_gene_variant(MODIFIER||3641||296|cyoE|protein_coding|CODING|AAC73531||1),upstream_gene_variant(MODIFIER||3300||109|cyoD|protein_coding|CODING|AAC73532||1),upstream_gene_variant(MODIFIER||2686||204…	3022	1118	COG1622	C	NO	450663	451610	-	G265A	-348.85	-343.23	5.00636e-11	5.69761e-11	159.37	168.3	0.4913	0.0565	234-283	0.3955	0.8311	234-283	0.5501	0.971773	0.947492
1060865	A	G	SNP	missense_variant	MODERATE	gAc/gGc	p.Asp537Gly/c.1610A>G	torA	EFF=missense_variant(MODERATE|MISSENSE|gAc/gGc|p.Asp537Gly/c.1610A>G|848|torA|protein_coding|CODING|AAC74082|1|1),upstream_gene_variant(MODIFIER||4687||914|torS|protein_coding|CODING|AAC74078||1|WARNING_TRANSCRIPT_NO_START_CODON),upstream_gene_variant(MODIFIER||934||199|torD|protein_coding|CODING|AAC74083||1),upstream_gene_variant(MODIFIER||2911||230|torR|protein_coding|CODING|AAC74080||1),upstre…	1	17	COG0243	C	NO	1059256	1061802	+	A1610G	-1150.4	-1156.21	8.13103e-23	3.75179e-23	589.78	497.25	0.5362	0.0333	1561-1611	0.6093	0.8294	1561-1611	0.5772	0.968361	0.908524
1556757	G	A	SNP	missense_variant	MODERATE	Gga/Aga	p.Gly45Arg/c.133G>A	osmC	EFF=missense_variant(MODERATE|MISSENSE|Gga/Aga|p.Gly45Arg/c.133G>A|143|osmC|protein_coding|CODING|AAC74555|1|1),upstream_gene_variant(MODIFIER||4075||94|yddM|protein_coding|CODING|AAD13441||1),upstream_gene_variant(MODIFIER||2919||336|adhP|protein_coding|CODING|AAC74551||1),upstream_gene_variant(MODIFIER||1088||565|maeA|protein_coding|CODING|AAC74552||1),upstream_gene_variant(MODIFIER||794||45|sr…	50	515	COG1764	O	NO	1556625	1557056	+	G133A	-144.09	-144.09	1.31269e-06	2.79841e-06	116.67	142.66	0.5135	0.0379	77-195	0.5827	0.5361	116-206	0.3	0.951789	0.902302
1601231	T	C	SNP	missense_variant	MODERATE	aAc/aGc	p.Asn4Ser/c.11A>G	lsrR	EFF=missense_variant(MODERATE|MISSENSE|aAc/aGc|p.Asn4Ser/c.11A>G|317|lsrR|protein_coding|CODING|AAC74585|1|1),upstream_gene_variant(MODIFIER||259||511|lsrA|protein_coding|CODING|AAC74586||1),upstream_gene_variant(MODIFIER||3244|||yneO|pseudogene|NON_CODING|b4696||1),upstream_gene_variant(MODIFIER||1788||342|lsrC|protein_coding|CODING|AAC74587||1),upstream_gene_variant(MODIFIER||2816||330|lsrD|pro…	7	27	COG2390	K	NO	1600288	1601241	-	A11G	-386.79	-389.13	9.92144e-10	2.40646e-10	182.36	206.39	0.5071	0.0257	8-211	0.5908	0.8707	127-198	0.5579	0.860907	0.838276
2058787	T	C	SNP	missense_variant	MODERATE	Acc/Gcc	p.Thr302Ala/c.904A>G	yeeO	EFF=missense_variant(MODERATE|MISSENSE|Acc/Gcc|p.Thr302Ala/c.904A>G|495|yeeO|protein_coding|CODING|AAC75048|1|1),upstream_gene_variant(MODIFIER||1064|||asnU|tRNA|NON_CODING|b1986||1),upstream_gene_variant(MODIFIER||3473|||asnV|tRNA|NON_CODING|b1989||1),upstream_gene_variant(MODIFIER||685|||asnW|tRNA|NON_CODING|b1984||1),downstream_gene_variant(MODIFIER||3828||438|shiA|protein_coding|CODING|AAC750…	2	48	COG0534	V	NO	2058203	2059690	-	A904G	-621.79	-621.39	3.29197e-18	3.32469e-18	267.23	267.24	0.4813	0.0167	902-1066	0.7133	0.9384	904-1063	0.7434	0.998334	0.958414
3108814	G	A	SNP	synonymous_variant	LOW	ggC/ggT	p.Gly114Gly/c.342C>T	speC	EFF=synonymous_variant(LOW|SILENT|ggC/ggT|p.Gly114Gly/c.342C>T|711|speC|protein_coding|CODING|AAC76002|1|1),upstream_gene_variant(MODIFIER||739||235|yqgA|protein_coding|CODING|AAC76003||1|WARNING_TRANSCRIPT_NO_START_CODON),upstream_gene_variant(MODIFIER||1552|||pheV|tRNA|NON_CODING|b2967||1),downstream_gene_variant(MODIFIER||4749||350|mutY|protein_coding|CODING|AAC75998||1),downstream_gene_varian…	28	55	COG1982	E	NO	3107020	3109155	-	C342T	-901.85	-899.71	6.23834e-25	5.92454e-25	427.39	427.51	0.4938	0.0001	327-376	0.9953	0.9996	327-376	0.9866	0.999985	0.999985
3631716	A	G	SNP	missense_variant	MODERATE	cTg/cCg	p.Leu292Pro/c.875T>C	yhiJ	EFF=missense_variant(MODERATE|MISSENSE|cTg/cCg|p.Leu292Pro/c.875T>C|540|yhiJ|protein_coding|CODING|AAC76513|1|1),upstream_gene_variant(MODIFIER||4913||374|yhhJ|protein_coding|CODING|AAC76510||1),upstream_gene_variant(MODIFIER||2178||911|rbbA|protein_coding|CODING|AAT48187||1),upstream_gene_variant(MODIFIER||3125||350|yhiM|protein_coding|CODING|AAC76516||1|WARNING_TRANSCRIPT_NO_START_CODON),upstre…	4	31	NA	NA	NO	3630968	3632590	-	T875C	-481.07	-480.75	6.68547e-18	1.51616e-17	263.55	323.79	0.3566	0.0309	861-1008	0.5525	0.9071	948-997	0.6757	0.964867	0.91272
3696076	G	A	SNP	missense_variant	MODERATE	gCc/gTc	p.Ala37Val/c.110C>T	yhjR	EFF=missense_variant(MODERATE|MISSENSE|gCc/gTc|p.Ala37Val/c.110C>T|62|yhjR|protein_coding|CODING|AAC76560|1|1),upstream_gene_variant(MODIFIER||382||523|bcsE|protein_coding|CODING|AAC76561||1),upstream_gene_variant(MODIFIER||3469||779|bcsB|protein_coding|CODING|AAC76557||1),upstream_gene_variant(MODIFIER||1950||63|bcsF|protein_coding|CODING|AAC76562||1),upstream_gene_variant(MODIFIER||2138||559|bc…	17	39	NA	NA	NO	3695997	3696185	-	C110T	-59.18	-59.27	0.00820376	0.0178446	18.77	52.71	0.4603	0.121	68-117	0.2077	0.4635	98-156	0.251	0.843401	0.738669
4179620	ACCCCC	ACCCCCC	INS	upstream_gene_variant	MODIFIER	.	.	.	EFF=upstream_gene_variant(MODIFIER||370||165|rplJ|protein_coding|CODING|AAC76959||1),upstream_gene_variant(MODIFIER||4600||316|coaA|protein_coding|CODING|AAC76952||1),upstream_gene_variant(MODIFIER||934||121|rplL|protein_coding|CODING|AAC76960||1),upstream_gene_variant(MODIFIER||1619||1342|rpoB|protein_coding|CODING|AAC76961||1),downstream_gene_variant(MODIFIER||4163|||thrU|tRNA|NON_CODING|b3976|…	.	.	NA	NA	.	.	.	.	.	.	.	.	.	.	.	.	.	.	.	.	.	.	.	.
4248956	A	G	SNP	missense_variant	MODERATE	aAg/aGg	p.Lys329Arg/c.986A>G	lamB	EFF=missense_variant(MODERATE|MISSENSE|aAg/aGg|p.Lys329Arg/c.986A>G|446|lamB|protein_coding|CODING|AAC77006|1|1),upstream_gene_variant(MODIFIER||598||306|malM|protein_coding|CODING|AAC77007||1),upstream_gene_variant(MODIFIER||3881||514|malF|protein_coding|CODING|AAC77003||1),upstream_gene_variant(MODIFIER||1747|||yjbI|pseudogene|NON_CODING|b4038||1),upstream_gene_variant(MODIFIER||2537||396|malE|…	3	316	COG4580	G	NO	4247971	4249311	+	A986G	-523.15	-526.58	1.98554e-16	4.18337e-16	209.67	189.98	0.5337	0.1378	933-1018	0.1958	0.513	948-1012	0.2858	0.961883	0.96361
4566457	C	T	SNP	missense_variant	MODERATE	Gcc/Acc	p.Ala264Thr/c.790G>A	yjiN	EFF=missense_variant(MODERATE|MISSENSE|Gcc/Acc|p.Ala264Thr/c.790G>A|426|yjiN|protein_coding|CODING|AAC77292|1|1),upstream_gene_variant(MODIFIER||3782||392|yjiJ|protein_coding|CODING|AAC77288||1),upstream_gene_variant(MODIFIER||2854||286|yjiK|protein_coding|CODING|AAC77289||1|WARNING_TRANSCRIPT_NO_START_CODON),upstream_gene_variant(MODIFIER||2541|||yjiP|pseudogene|NON_CODING|b4339||1),upstream_gen…	5	34	COG2733	S	NO	4565966	4567246	-	G790A	-575.17	-574.97	3.43954e-15	7.40838e-15	201.69	146.73	0.5062	0.0853	690-792	0.336	0.6529	702-765	0.3891	0.989308	0.937957
