# Supplementary material for: RNA chaperones buffer deleterious mutations in E. coli
Source: eLife. 2015 Mar 25;4:e04745. doi: 10.7554/eLife.04745 (PMC4402597; doi:10.7554/eLife.04745)
Supplement: Supplementary file 5. — Primers used for recombineering and sequencing. DOI: http://dx.doi.org/10.7554/eLife.04745.020 [file elife04745s005.xlsx]

## Sheet: Sheet1
Supplementary file 5 - Primersused for recombineering and sequencing
Primers used for introducing point mutations
Primer name	Primer sequence
rapA_Ok	GC GGC GCA GGT AGA GTT TGA AAC CTT TAA CCA CCA GCT TAA CGC GGT TAA CCG TCA CAC CGG CAG CAA ACT GGT T
cyoA_Ok	GTA CAG CCC GAA CTG GTC ACA CTC CAA TAA AGT GAA AGC TGT GGT CTG GAC GGT ACC TAT CTT AAT CAT
torA_Ok	GAT AAT GCC ACG GTT GGA GTG ATT GCC GTA CTG GCC GAG ATC GTT ACG CTC AAA CTG CGT GGT CGC AGG
osmC_Ok	CG CTG CGC CAA TCA GTT CTT CAG GGT TGG TTC TTT TTT CGC CTT CAA AAC GCG TGT TAA ATC CAT ACG GCT GTT G
lsrR_Ok	TG TTC AAA GTG AAG AAT GAA TTA TGA CAA TCA GCG ATT CGG CAA TTT CAG AAC AGG GAA TGT GTG AAG AAG AAC A
speC_Ok	TT TTA TGA CAC GCT GAC GCA GTA CGT TGA GAT GGG TAA CAG CAC CTT TGC TTG CCC TGG ACA TCA ACA TGG TGC GTT T
lamB_Ok	TG TAC ATC GGG CGA ATA CCG ACG GTC CAC CAC CTG GTC CCG TTG TCG TTA TCC CAG TTG ATA TCC TGG TAC ATA C
rplS_non-syn_Ok	CCA GAC TCA CTC TCC GGT AGT TGA CAG CAT TTC TAT CAA ACG TCG TGG TGC TGT TCG TAA AGC TAA ACT
rplS_syn_Ok	CTG TCA AAC GTC GTG GTG CTG TTC GTA AAG CTA AGC TGT ACT ACC TGC GTG AGC GTA CTG GTA AGG CTG
Primers used for sequencing
Primer name	Primer sequence
rapA_fwd	TTC GTC GTC ACG AAT GTT CGG G
rapA_RC	CCT TTC TGG CGA TAC CGG TAG
cyoA_fwd	AAA GCG ATT TCA TTC ACG GTA GC
cyoA_RC	TTG CAG GCA CTG TAT TGC TCA GT
torA_fwd	ATC GAT GCG ATC CTC GAA CC
torA_RC	TTA TTC CAG AAG TCA TCA AAC GCT
osmC_fwd	TCG GAA TAT CCT GCT TAT CCT CG
osmC_RC	AAG GTA GAG GCA TCA ATA CCC G
lsrR_fwd	TTC CAG ACA GCC TTC AAA GCG
lsrR_RC	CTT TTA ATT TGT TCA TAA CCT TAG GTG
speC_fwd	TTT ATT CGC TGC CGA TGT GCC
speC_RC	CGG CAG TCG TCA TTA CCG C
lamB_fwd	GTG TCC TGA AGG GCT TTA ACA A
lamB_RC	AGC GTT ACC GGT GTA GTC GTA A
rplS_non-syn_fwd	AAT ATC CCA TAG CCA GTA ACA AG
rplS_non-syn_RC	GCA ACT TGA ACA AGA GCA GAT G
rplS_syn_fwd	CAC AGG GTT TAG GAA AAA AAT
rplS_syn_RC	GTA CCT TCC TTC CGT CCG G
